# Supplementary material for: TP53mutation–associated and copy number–dependent KDM7A-DT expression affects DNA repair and promotes invasive breast cancer progression
Source: Research Square preprint supplement (doi:10.21203/rs.3.rs-1896103/v3), 2022-09-27
Supplement: Supplementary file 1 [file 002230d78ef6bddef3185a32.xlsx]

## Sheet: Sheet1
Table S18. Cancer Hallmark Genesets correlated with correlated with the genes coregulated with KDM7A-DT expression. Empy cell: p-value <9.99E-10
	Breast cancer	TGM2		NOTCH1		WWTR1		EGFR		YAP1		SMAD3
		Oncogene		Oncogene		Oncogene		Oncogene		Oncogene		Tumor suppressor
	HALLMARK Geneset correlated with an expressed gene	Correlation	P-value	Correlation	P-value	Correlation	P-value	Correlation	P-value	Correlation	P-value	Correlation	P-value
1	IL2_STAT5_SIGNALING	0.616	3.05e-115	0.475	1.8e-62	0.509	5.44e-73	0.532	9.77e-81	0.284	1.07e-21
2	IL6_JAK_STAT3_SIGNALING	0.604	8.18e-110	0.456	4.18e-57	0.431	1.27e-50	0.448	6.09e-55	0.228	2.58e-14
3	COMPLEMENT	0.601	2.93e-108	0.371	5.73e-37	0.415	1.13e-46	0.407	9.31e-45	0.242	5.49e-16
4	INFLAMMATORY_RESPONSE	0.6	4.5e-108	0.44	6.28e-53	0.489	9e-67	0.466	6.4e-60	0.281	2.69e-21
5	ALLOGRAFT_REJECTION	0.578	2.42e-98	0.394	7.66e-42	0.339	9.08e-31	0.373	2.5e-37
6	KRAS_SIGNALING_UP	0.555	1.72e-89	0.478	1.57e-63	0.562	5.01e-92	0.576	1.94e-97	0.415	1.04e-46
7	APOPTOSIS	0.543	7.63e-85	0.315	1.21e-26	0.295	1.84e-23	0.31	7.44e-26	0.23	1.47e-14
8	TNFA_SIGNALING_VIA_NFKB	0.515	5.68e-75	0.504	1.91e-71	0.48	4.84e-64	0.521	4.02e-77	0.311	5.31e-26
9	INTERFERON_GAMMA_RESPONSE	0.51	1.44e-73	0.247	1.33e-16	0.224	7.35e-14	0.225	5.16e-14
10	COAGULATION	0.483	4.98e-65	0.35	9.1e-33	0.301	2.4e-24	0.304	9.94e-25	0.244	2.83e-16
11	APICAL_JUNCTION	0.42	6.07e-48	0.584	4.43e-101	0.521	3.88e-77	0.585	2.24e-101	0.4	3.63e-43
12	HYPOXIA	0.411	8.43e-46	0.476	7.25e-63	0.536	2.24e-82	0.546	7.91e-86	0.366	5.9e-36
13	ANGIOGENESIS	0.398	9.28e-43	0.356	6.17e-34	0.379	9.63e-39	0.325	2.78e-28	0.281	2.76e-21
14	EPITHELIAL_MESENCHYMAL_TRANSITION	0.383	2.04e-39	0.385	4.87e-40	0.497	3.32e-69	0.424	6.44e-49	0.425	2.88e-49
15	INTERFERON_ALPHA_RESPONSE	0.382	3.28e-39	0.107	0.000414
16	APICAL_SURFACE	0.368	2.64e-36	0.344	1.03e-31	0.375	6.64e-38	0.382	2.35e-39	0.307	2.34e-25
17	XENOBIOTIC_METABOLISM	0.359	1.46e-34
18	PI3K_AKT_MTOR_SIGNALING	0.345	6.26e-32	0.219	2.38e-13	0.312	3.5e-26	0.378	1.94e-38
19	REACTIVE_OXIGEN_SPECIES_PATHWAY	0.34	5.8e-31	0.212	1.57e-12					-0.197	4.88e-11	-0.291	8.56e-23
20	P53_PATHWAY	0.338	1.36e-30	0.319	2.74e-27			0.192	1.72e-10
21	MYOGENESIS	0.281	3.2e-21	0.427	1.39e-49	0.27	1.02e-19	0.327	1.17e-28
22	UV_RESPONSE_UP	0.276	1.51e-20	0.264	7.25e-19					-0.225	4.63e-14	-0.252	2.69e-17
23	TGF_BETA_SIGNALING	0.27	1.14e-19	0.4	2.66e-43	0.572	3.99e-96	0.521	5.47e-77	0.508	7.53e-73	0.317	7.1e-27
24	UV_RESPONSE_DN	0.256	8.57e-18	0.29	1.37e-22	0.591	6.55e-104	0.52	8.42e-77	0.587	3.88e-102	0.31	8.62e-26
25	ANDROGEN_RESPONSE	0.244	2.54e-16			0.435	1.36e-51	0.357	3.17e-34	0.47	3.44e-61
26	WNT_BETA_CATENIN_SIGNALING	0.236	2.67e-15	0.68	4.62e-149	0.397	1.64e-42	0.497	2.38e-69
27	NOTCH_SIGNALING	0.215	6.42e-13	0.616	2.28e-115	0.531	1.28e-80	0.568	2.15e-94	0.403	7.05e-44
28	ADIPOGENESIS	0.212	1.41e-12
29	HEDGEHOG_SIGNALING	0.192	1.43e-10	0.48	5.57e-64	0.537	8.12e-83	0.58	3.94e-99	0.428	8.06e-50
30	MTORC1_SIGNALING	0.188	3.44e-10	0.073	0.0159			0.189	3.03e-10			-0.337	2.11e-30
31	CHOLESTEROL_HOMEOSTASIS											-0.215	6.43e-13
32	FATTY_ACID_METABOLISM			-0.234	4.72e-15	-0.212	1.31e-12	-0.205	7.16e-12
33	MITOTIC_SPINDLE			0.312	4.82e-26	0.402	8.61e-44	0.39	6.14e-41	0.188	3.67e-10
34	UNFOLDED_PROTEIN_RESPONSE											-0.285	6.97e-22
35	HEME_METABOLISM					0.192	1.48e-10			0.258	4.58e-18
36	GLYCOLYSIS											-0.416	5.53e-47
37	PANCREAS_BETA_CELLS
38	PROTEIN_SECRETION					0.32	2.23e-27	0.244	2.9e-16	0.442	1.55e-53
39	BILE_ACID_METABOLISM			-0.264	5.96e-19							0.203	1.38e-11
40	ESTROGEN_RESPONSE_LATE			-0.272	5.58e-20	-0.284	9.3e-22	-0.302	1.66e-24			0.259	2.95e-18
41	PEROXISOME			-0.392	1.42e-41	-0.31	1.02e-25	-0.325	2.86e-28	-0.208	3.76e-12
42	G2M_CHECKPOINT											-0.187	4.6e-10
43	MYC_TARGETS_V1									-0.272	4.97e-20	-0.322	7.35e-28
44	KRAS_SIGNALING_DN			0.304	9.15e-25	0.186	5.39e-10	0.317	5.98e-27
45	ESTROGEN_RESPONSE_EARLY			-0.253	2.21e-17			-0.247	1.06e-16			0.365	1.09e-35
46	MYC_TARGETS_V2									-0.37	9.04e-37	-0.326	1.87e-28
47	E2F_TARGETS									-0.187	4.63e-10	-0.219	2.18e-13
48	OXIDATIVE_PHOSPHORYLATION			-0.296	1.69e-23	-0.485	1.41e-65	-0.44	6.77e-53	-0.467	2.24e-60	-0.29	1.34e-22
49	DNA_REPAIR			-0.198	3.68e-11	-0.496	4.91e-69	-0.419	1.16e-47	-0.576	1.78e-97	-0.253	1.94e-17
50	SPERMATOGENESIS											-0.187	4.4e-10
