# Supplementary material for: TP53mutation–associated and copy number–dependent KDM7A-DT expression affects DNA repair and promotes invasive breast cancer progression
Source: Research Square preprint supplement (doi:10.21203/rs.3.rs-1896103/v3), 2022-09-27
Supplement: Supplementary file 2 [file 074142141b5f8500df5774e9.xlsx]

## Sheet: ST11
Table S11. Spearman Rank Order Correlation Matrix of KDM7A-DT mRNA, essential genetic variables and genomic scores avaialble in 1072 TCGA breast cancer samples
Variables	log2 (KDM7A-DT RNA)	log2 (TP53 mRNA)*	log2 (TP53BP1 mRNA)	Buffa Hypoxia Score	Ragnum Hypoxia Score	3'UTR Mutations	5'Flank Mutations*	Missense Mutations	Nonsense Mutations	RNA Mutations	Silent Mutations	Splice Region mutations*	Aneuploidy Score 1	Fraction Genome Altered	SNV Neoantigens	Indel Neoantigens	Leukocyte Fraction	Intratumor Heterogeneity	Proliferation Score	Wound Healing Score	Number of Segments (CNA)	Homologous Recombination Defects	TP53 Missense and No Mutations
log2 (KDM7A-DT RNA)	1	-0.015434	-0.344074	0.35983	0.262166	0.211257	0.1313	0.302296	0.214286	0.162934	0.264074	0.080088	0.239667	0.136608	0.305318	0.144554	0.238126	0.193135	0.16663	0.230337	0.136959	0.228554	0.366566
log2 (TP53 mRNA)	-0.015434	1	0.002035	-0.012598	-0.009584	0.007881	0.060289	-0.054081	-0.068908	0.010858	-0.067797	-0.022987	-0.016558	-0.093538	-0.059466	0.007567	0.038251	0.002425	0.013313	0.051935	-0.103096	-0.093697	0.356847
log2 (TP53BP1 mRNA)	-0.344074	0.002035	1	-0.487186	-0.229962	-0.302265	-0.075716	-0.287153	-0.154374	-0.164561	-0.262237	-0.117965	-0.210966	-0.239555	-0.264566	-0.132978	-0.135205	-0.225641	-0.225685	-0.441758	-0.238564	-0.364143	-0.249889
Buffa Hypoxia Score	0.35983	-0.012598	-0.487186	1	0.773955	0.26825	0.074655	0.453807	0.227962	0.208146	0.385865	0.067333	0.393373	0.543284	0.423952	0.160628	0.081698	0.42197	0.739232	0.85877	0.598958	0.621006	0.512034
Ragnum Hypoxia Score	0.262166	-0.009584	-0.229962	0.773955	1	0.181414	0.049274	0.41822	0.199102	0.136135	0.368139	0.050427	0.384386	0.523328	0.404042	0.119896	0.087731	0.390218	0.879871	0.801635	0.603473	0.614061	0.431624
3'UTR Mutations	0.211257	0.007881	-0.302265	0.26825	0.181414	1	0.416397	0.637823	0.509815	0.540908	0.614088	0.494297	0.131383	0.203703	0.566451	0.229927	0.156988	0.101665	0.195351	0.212712	0.240871	0.316197	0.28178
5'Flank Mutations*	0.1313	0.060289	-0.075716	0.074655	0.049274	0.416397	1	0.394812	0.328867	0.451695	0.36095	0.414686	-0.00417	-0.00634	0.334163	0.212466	0.032983	-0.004808	0.060457	0.053566	-0.009493	0.039436	0.068864
Missense Mutations	0.302296	-0.054081	-0.287153	0.453807	0.41822	0.637823	0.394812	1	0.690937	0.562869	0.87814	0.564306	0.267699	0.398305	0.910653	0.289482	0.160021	0.293495	0.433802	0.405642	0.437367	0.528891	0.39368
Nonsense Mutations	0.214286	-0.068908	-0.154374	0.227962	0.199102	0.509815	0.328867	0.690937	1	0.47134	0.679196	0.530586	0.100529	0.208103	0.645175	0.16785	0.152353	0.091121	0.194308	0.185757	0.239463	0.300854	0.175862
RNA Mutations	0.162934	0.010858	-0.164561	0.208146	0.136135	0.540908	0.451695	0.562869	0.47134	1	0.52695	0.441456	0.036831	0.09937	0.507193	0.142202	0.097131	0.033229	0.145396	0.156133	0.15283	0.177924	0.224499
Silent Mutations	0.264074	-0.067797	-0.262237	0.385865	0.368139	0.614088	0.36095	0.87814	0.679196	0.52695	1	0.568696	0.230185	0.363424	0.810132	0.258371	0.112307	0.244505	0.388662	0.347476	0.400212	0.463641	0.344528
Splice Region mutations*	0.080088	-0.022987	-0.117965	0.067333	0.050427	0.494297	0.414686	0.564306	0.530586	0.441456	0.568696	1	0.051669	0.022692	0.510062	0.183042	0.109224	-0.006944	0.045415	0.062377	0.034508	0.046385	0.043428
Aneuploidy Score 1	0.239667	-0.016558	-0.210966	0.393373	0.384386	0.131383	-0.00417	0.267699	0.100529	0.036831	0.230185	0.051669	1	0.645583	0.275662	0.076382	0.009329	0.420379	0.384776	0.354473	0.411047	0.42549	0.288485
Fraction Genome Altered	0.136608	-0.093538	-0.239555	0.543284	0.523328	0.203703	-0.00634	0.398305	0.208103	0.09937	0.363424	0.022692	0.645583	1	0.405942	0.173176	-0.204851	0.372167	0.561026	0.507776	0.681913	0.692138	0.3157
SNV Neoantigens	0.305318	-0.059466	-0.264566	0.423952	0.404042	0.566451	0.334163	0.910653	0.645175	0.507193	0.810132	0.510062	0.275662	0.405942	1	0.303724	0.12729	0.286452	0.425474	0.390936	0.432766	0.508125	0.373894
Indel Neoantigens	0.144554	0.007567	-0.132978	0.160628	0.119896	0.229927	0.212466	0.289482	0.16785	0.142202	0.258371	0.183042	0.076382	0.173176	0.303724	1	0.039445	0.105026	0.156241	0.14042	0.116288	0.208585	0.068539
Leukocyte Fraction	0.238126	0.038251	-0.135205	0.081698	0.087731	0.156988	0.032983	0.160021	0.152353	0.097131	0.112307	0.109224	0.009329	-0.204851	0.12729	0.039445	1	0.147899	0.084424	0.123451	-0.064046	0.10584	0.252462
Intratumor Heterogeneity	0.193135	0.002425	-0.225641	0.42197	0.390218	0.101665	-0.004808	0.293495	0.091121	0.033229	0.244505	-0.006944	0.420379	0.372167	0.286452	0.105026	0.147899	1	0.407444	0.419461	0.336294	0.433385	0.266352
Proliferation Score	0.16663	0.013313	-0.225685	0.739232	0.879871	0.195351	0.060457	0.433802	0.194308	0.145396	0.388662	0.045415	0.384776	0.561026	0.425474	0.156241	0.084424	0.407444	1	0.842129	0.620564	0.650411	0.433361
Wound Healing Score	0.230337	0.051935	-0.441758	0.85877	0.801635	0.212712	0.053566	0.405642	0.185757	0.156133	0.347476	0.062377	0.354473	0.507776	0.390936	0.14042	0.123451	0.419461	0.842129	1	0.59565	0.620621	0.443805
Number of Segments (CNA)	0.136959	-0.103096	-0.238564	0.598958	0.603473	0.240871	-0.009493	0.437367	0.239463	0.15283	0.400212	0.034508	0.411047	0.681913	0.432766	0.116288	-0.064046	0.336294	0.620564	0.59565	1	0.789747	0.3901
Homologous Recombination Defects	0.228554	-0.093697	-0.364143	0.621006	0.614061	0.316197	0.039436	0.528891	0.300854	0.177924	0.463641	0.046385	0.42549	0.692138	0.508125	0.208585	0.10584	0.433385	0.650411	0.620621	0.789747	1	0.461922
TP53 Missense MS **	0.366566	0.356847	-0.249889	0.512034	0.431624	0.28178	0.068864	0.39368	0.175862	0.224499	0.344528	0.043428	0.288485	0.3157	0.373894	0.068539	0.252462	0.266352	0.433361	0.443805	0.3901	0.461922	1
*: blue: correlation is not significant at p<0.001
**: TP53 Missense score: binary vector(1,2) where 1: TP53 wild type, 2: TP53 missense mutation.
