# Supplementary material for: TP53mutation–associated and copy number–dependent KDM7A-DT expression affects DNA repair and promotes invasive breast cancer progression
Source: Research Square preprint supplement (doi:10.21203/rs.3.rs-1896103/v3), 2022-09-27
Supplement: Supplementary file 3 [file 0900da34c8356780b3d193a5.xlsx]

## Sheet: Main Tab.2
Table 2. KDM7A-DT-defined concordant correlated proteins and mRNAs encoded by primary BRCA46 genes (p<0.015 for RNA and p<0.05 for proteins). The 876 tumor samples with 191 protein data (RPPA) were used to calculate the correlation coefficients.
n/n	KDM7A-DT epression: Correlation direction: pos.=1, neg.=2	mRNA Symbol	Cytoband	Spearman's Correlation	p-value	Protein Symbol	Spearman's Correlation	p-value	Invasive tumors (IPA)	Number of references (IPA)	EMT pathways
A. Positive correlations between KDM7A-DT expression and gene and protein expressions
1	1	ANXA1	9q21.13	0.267482	3.02517e-14	ANXA1	0.230567	5.20829e-12	Increases	35
2	1	CDH3	16q22.1	0.3216	3.16401e-20	CDH3	0.227657	9.73823e-12
3	1	AKT3	1q43-q44	0.158292	8.921e-06	AKT3	0.21825	1.6002e-10	Increases	36	1
4	1	EGFR	7p11.2	0.28616	3.63226e-16	EGFR	0.213057	1.98003e-10	Increases	26	1
5	1	LCK	1p35.2	0.244233	4.67536e-12	LCK	0.177965	1.1833e-07	Affects	20
6	1	KIT	4q12	0.187099	1.41297e-07	KIT	0.152884	5.62483e-06	Increases	21
7	1	TGM2	20q11.23	0.220682	4.65281e-10	TGM2	0.151156	7.18523e-06	Increases	6	1
8	1	WWTR1	3q25.1	0.235676	2.63547e-11	WWTR1	0.130631	0.000107515	Increases	4	1
9	1	G6PD	Xq28	0.242391	6.82274e-12	G6PD	0.127713	0.000153236
10	1	CCNE1	19q12	0.248548	1.90563e-12	CCNE1	0.124102	0.000235184	Affects	29
11	1	STMN1	1p36.11	0.185307	1.86556e-07	STMN1	0.121033	0.000335499	Affects	7
12	1	YAP1	11q22.1	0.151513	2.14445e-05	YAP1	0.112499	0.00086318	Increases	2	1
13	1	NOTCH1	9q34.3	0.259473	1.81859e-13	NOTCH1	0.111239	0.000987291	Increases	18	1
14	1	SRC	20q11.23	0.158512	8.66519e-06	SRC	0.100799	0.00285138	Increases	8
15	1	TIGAR	12p13.32	0.141858	7.01903e-05	TIGAR	0.0914581	0.00681765
16	1	ACVRL1	12q13.13	0.152107	1.98873e-05	ACVRL1	0.0906179	0.00734762
17	1	PRKCA	17q24.2	0.168113	2.3439e-06	PRKCA	0.0863405	0.0106602	Affects	15
18	1	CHEK1	11q24.2	0.207548	4.88501e-09	CHEK1	0.0856959	0.0112606	Affects	27
19	1	TFRC	3q29	0.251033	1.12774e-12	TFRC	0.0849824	0.0119598
20	1	PRDX1	1p34.1	0.213281	1.78313e-09	PRDX1	0.0803682	0.0174821
21	1	BAX	19q13.33	0.175555	8.07794e-07	BAX	0.0803224	0.0175466	Decreases	32
22	1	ETS1	11q24.3	0.175692	7.91771e-07	ETS1	0.0777624	0.0214981			1
23	1	YWHAZ	8q22.3	0.14685	3.83733e-05	YWHAZ	0.0741592	0.0283587	Affects	1
24	1	RAD51	15q15.1	0.185599	1.78328e-07	RAD51	0.0717661	0.033892	Affects	13
B. Negative correlations between KDM7A-DT expression and gene and protein expressions
25	2	GATA3	10p14	-0.47435	5.18688e-45	GATA3	-0.435285	1.03133e-41	Affects /Decreases	4*
26	2	BCL2	18q21.33	-0.499733	1.64026e-50	BCL2	-0.419253	1.5969e-38	Affects	31
27	2	ESR1	6q25.1-q25.2	-0.393035	3.24223e-30	ESR1	-0.352394	5.93893e-27	Affects	24
28	2	PREX1	20q13.13	-0.270544	1.49958e-14	PREX1	-0.265048	1.61997e-15	Affects	16
29	2	TP53BP1	15q15.3	-0.333081	1.1562e-21	TP53BP1	-0.258561	8.1361e-15	Decreases	5
30	2	INPP4B	4q31.21	-0.231707	5.74668e-11	INPP4B	-0.246047	1.61548e-13
31	2	XRCC1	19q13.31	-0.149038	2.92679e-05	XRCC1	-0.210036	3.59715e-10	Affects	3
32	2	RPTOR	17q25.3	-0.185074	1.93405e-07	RPTOR	-0.203312	1.31576e-09	Increases	10
33	2	BCL2L11	2q13	-0.131184	0.000238998	BCL2L11	-0.2036	1.24583e-09	Decreases	30
34	2	IRS1	2q36.3	-0.322579	2.39903e-20	IRS1	-0.178838	1.02357e-07	Increases	22
35	2	MAPK9	5q35.3	-0.196623	3.08212e-08	MAPK9	-0.172992	2.66408e-07	Affects	19
36	2	AR	Xq12	-0.162843	4.84898e-06	AR	-0.151025	7.31985e-06	Affects	34
37	2	RPS6KB1	17q23.1	-0.190688	8.03242e-08	RPS6KB1	-0.149316	9.29972e-06	Increases	11
38	2	PGR	11q22.1	-0.189738	9.33705e-08	PGR	-0.138787	3.83695e-05	Affects	17
39	2	RICTOR	5p13.1	-0.209804	3.2971e-09	RICTOR	-0.131308	9.89135e-05	Increases	12
40	2	SMAD3	15q22.33	-0.234187	3.53619e-11	SMAD3	-0.128108	0.000146132	Decreases	9	1
41	2	CDKN1B	12p13.1	-0.254127	5.8218e-13	CDKN1B	-0.125345	0.000203203	Increases	28
42	2	ARID1A	1p36.11	-0.166728	2.84351e-06	ARID1A	-0.134731	0.000241913	Decreases	33
43	2	ACACA	17q12	-0.129863	0.000276398	ACACA	-0.123856	0.000242072
44	2	RAD50	5q31.1	-0.302494	5.72952e-18	RAD50	-0.118476	0.000448258	Affects	14
45	2	ERBB3	12q13.2	-0.215695	1.15662e-09	ERBB3	-0.1097	0.001161	Increases	25
46	2	XRCC5	2q35	-0.0870967	0.0149659	Ku80	-0.10881	0.001274
* References by manual curation for breast cancer (see Suppl. Materials References)
1: Shaoxian T, Baohua Y, Xiaoli X, Yufan C, Xiaoyu T, Hongfen L, Rui B, Xiangjie
S, Ruohong S, Wentao Y. Characterisation of GATA3 expression in invasive breast
cancer: differences in histological subtypes and immunohistochemically defined
molecular subtypes. J Clin Pathol. 2017 Nov;70(11):926-934. doi:
10.1136/jclinpath-2016-204137. Epub 2017 Apr 20. PMID: 28428285.
2: Gaynor KU, Grigorieva IV, Allen MD, Esapa CT, Head RA, Gopinath P, Christie
PT, Nesbit MA, Jones JL, Thakker RV. GATA3 mutations found in breast cancers may
be associated with aberrant nuclear localization, reduced transactivation and
cell invasiveness. Horm Cancer. 2013 Jun;4(3):123-39. doi:
10.1007/s12672-013-0138-x. Epub 2013 Feb 22. PMID: 23435732.
3: Querzoli P, Pedriali M, Rinaldi R, Secchiero P, Rossi PG, Kuhn E.
<i>GATA3</i> as an Adjunct Prognostic Factor in Breast Cancer Patients with Less
Aggressive Disease: A Study with a Review of the Literature. Diagnostics
(Basel). 2021 Mar 28;11(4):604. doi: 10.3390/diagnostics11040604. PMID:
33800667; PMCID: PMC8066261.
4: Yu W, Huang W, Yang Y, Qiu R, Zeng Y, Hou Y, Sun G, Shi H, Leng S, Feng D,
Chen Y, Wang S, Teng X, Yu H, Wang Y. GATA3 recruits UTX for gene
transcriptional activation to suppress metastasis of breast cancer. Cell Death
Dis. 2019 Nov 4;10(11):832. doi: 10.1038/s41419-019-2062-7. PMID: 31685800;
PMCID: PMC6828764.
