# Supplementary material for: TP53mutation–associated and copy number–dependent KDM7A-DT expression affects DNA repair and promotes invasive breast cancer progression
Source: Research Square preprint supplement (doi:10.21203/rs.3.rs-1896103/v3), 2022-09-27
Supplement: Supplementary file 4 [file 097289c3c3ac7362ec2aed55.xlsx]

## Sheet: ST6
Table S6. Gene Set Enrichment Analysis for Hallmark Gene set pathways in differentially expressed genes
Experiment	Description	genes	setSize	gene ratio	enrichmentScore	NES	pvalue	p.adjust	qvalues	rank	leading_edge	core_enrichment
Overexpresion	Myc Targets V2	35	55	0.636364	0.789524	2.7706	1e-10	1.25e-09	4.47368e-10	1225	tags=64%, list=9%, signal=58%	MYC/NOP2/TFB2M/PPRC1/AIMP2/BYSL/NOP16/WDR43/GRWD1/RABEPK/PA2G4/EXOSC5/WDR74/RRP12/NOP56/PUS1/TBRG4/PHB/NOLC1/GNL3/PRMT3/IMP4/HSPD1/LAS1L/RCL1/NDUFAF4/FARSA/NIP7/DDX18/SUPV3L1/MRTO4/RRP9/PES1/MYBBP1A/MCM4
Overexpresion	Myc Targets V1	95	194	0.489691	0.586966	2.51166	1e-10	1.25e-09	4.47368e-10	2567	tags=49%, list=18%, signal=41%	MYC/DDX21/EIF4E/IFRD1/ODC1/AIMP2/NOP16/RSL1D1/SERBP1/MRPS18B/CYC1/NHP2/CNBP/ABCE1/CCT7/EIF3D/PA2G4/RNPS1/TRIM28/COPS5/EIF4A1/NOP56/C1QBP/CCT2/PHB/NOLC1/SNRPA1/GNL3/ETF1/DHX15/SET/TUFM/PSMC6/RPLP0/SMARCC1/SRPK1/HSPD1/POLD2/FBL/CTPS1/CCT5/MRPL9/ACP1/RPS6/G3BP1/PPM1G/GSPT1/EIF3B/DDX18/RPS5/POLE3/RRP9/SF3A1/RPL34/MCM4/HSP90AB1/RPL14/MCM7/HNRNPA3/GOT2/CLNS1A/EXOSC7/RPL22/IMPDH2/RUVBL2/MAD2L1/UBA2/NME1…
Overexpresion	Interferon Alpha Response	45	87	0.517241	-0.661218	-2.42685	1e-10	1.25e-09	4.47368e-10	2575	tags=52%, list=18%, signal=43%	TRAFD1/GMPR/RNF31/TRIM5/DHX58/IFIT2/TAP1/IFIT3/ISG20/USP18/PARP14/GBP2/PARP9/EIF2AK2/DDX60/PSME2/IFI44L/OAS1/EPSTI1/TMEM140/IRF7/WARS1/MOV10/IL4R/BST2/SP110/IRF1/PROCR/IFITM3/PSME1/IRF9/LY6E/HELZ2/CD47/IFITM2/IFI35/B2M/UBE2L6/LGALS3BP/ISG15/STAT2/C1S/IFI27/MX1/IFITM1
Overexpresion	Epithelial Mesenchymal Transition	88	184	0.478261	-0.727756	-2.95727	1e-10	1.25e-09	4.47368e-10	1106	tags=48%, list=8%, signal=45%	ANPEP/SGCB/FAP/ITGAV/WNT5A/TNFAIP3/LOXL1/PLOD3/HTRA1/VCAN/BMP1/SDC1/TIMP1/PFN2/IGFBP3/MATN2/ENO2/MXRA5/SPOCK1/VEGFC/COL12A1/FERMT2/CDH11/LGALS1/SGCD/TFPI2/IL6/PLAUR/PLOD2/ITGA5/SFRP1/COL16A1/FSTL1/PPIB/GPX7/FSTL3/SERPINE1/NID2/COL6A2/THBS1/DCN/COL6A3/ITGB5/ACTA2/LOX/CALU/FBN2/TPM2/COL7A1/NNMT/COL4A2/CD44/CCN2/MYLK/NTM/SERPINH1/COLGALT1/GLIPR1/ITGB1/P3H1/QSOX1/TNC/MYL9/BGN/PMP22/TPM1/CALD1/CAP2/CD…
Knockdown (Untreated) - Group B	Interferon Alpha Response	28	78	0.358974	0.582276	3.04889	1e-10	1.63333e-09	1.26316e-09	851	tags=36%, list=7%, signal=34%	IFI27/IFIT2/SAMD9/OASL/ISG15/OAS1/IRF7/ISG20/IRF9/CASP1/EPSTI1/LPAR6/LAMP3/GBP2/TRIM5/DDX60/TRIM26/IRF1/HERC6/TENT5A/PLSCR1/IFI30/DHX58/TXNIP/MX1/HELZ2/TRAFD1/IFI44
Knockdown (Untreated) - Group B	Interferon Gamma Response	36	141	0.255319	0.400902	2.34323	1e-10	1.63333e-09	1.26316e-09	975	tags=26%, list=8%, signal=24%	IFI27/IFIT2/CCL2/OASL/ISG15/IFIT1/CASP4/IRF7/ISG20/IRF9/CASP1/UPP1/EPSTI1/SOCS1/NAMPT/CD40/DDX60/TRIM26/IRF1/HLA-G/HERC6/ZNFX1/PLSCR1/IFI30/DHX58/APOL6/TXNIP/SECTM1/PELI1/MX1/HELZ2/TRAFD1/IFI44/FAS/LCP2/HIF1A
Knockdown (Untreated) - Group B	Tnfa Signaling Via Nfkb	31	147	0.210884	0.426327	2.53213	1e-10	1.63333e-09	1.26316e-09	728	tags=21%, list=6%, signal=20%	IFIT2/CCL2/ABCA1/DUSP1/ZC3H12A/SIK1/PPP1R15A/TNF/CCN1/GEM/CEBPD/PLPP3/NAMPT/NFIL3/RELB/TSC22D1/FUT4/GADD45A/KLF6/CLCF1/DNAJB4/IRF1/ATF3/PLAUR/IER2/JUN/MARCKS/EFNA1/KLF4/BTG2/SQSTM1
Overexpresion	Apical Junction	65	163	0.398773	-0.53796	-2.1461	6.38399e-10	6.38399e-09	2.2848e-09	2040	tags=40%, list=14%, signal=35%	ATP1A3/ITGA9/LAMB3/GAMT/TUBG1/GNAI2/PALS1/SPEG/ZYX/THBS3/VCAM1/SIRPA/CRB3/MSN/HADH/FLNC/MYH10/NEXN/CD276/PFN1/LIMA1/CDH15/TMEM8B/TSPAN4/TNFRSF11B/MYL12B/CERCAM/NECTIN2/INPPL1/VCAN/BMP1/ADAM23/ACTG1/NLGN2/ARHGEF6/ACTN4/TRO/B4GALT1/ACTB/VCL/EPB41L2/RRAS/CDH11/FSCN1/JUP/SGCE/JAM3/MYH9/COL16A1/RAC2/MDK/PARVA/MAP4K2/EVL/CD99/ITGA3/LAYN/ACTN1/ITGB1/MYL9/CNN2/CDH6/TGFBI/THY1/ACTG2
Overexpresion	Interferon Gamma Response	66	170	0.388235	-0.512148	-2.06112	1.15358e-08	9.61313e-08	3.44049e-08	2333	tags=39%, list=16%, signal=33%	DHX58/IFIT2/NUP93/SOCS1/TAP1/IFIT3/CFB/DDX58/VCAM1/PML/PFKP/ISG20/METTL7B/OAS2/USP18/PARP14/EIF2AK2/CFH/DDX60/PSME2/IFI44L/SPPL2A/EPSTI1/IRF7/HLA-G/SSPN/ST3GAL5/WARS1/IFNAR2/TNFAIP3/IL4R/BST2/RBCK1/CCL5/SP110/PSMB10/IRF1/TAPBP/MVP/IFITM3/IFIT1/STAT1/SOD2/C1R/HLA-A/MT2A/PSME1/IRF9/IL6/LY6E/VAMP5/HELZ2/HLA-B/IFITM2/IFI35/B2M/UBE2L6/LGALS3BP/HLA-DMA/ISG15/STAT2/C1S/IFI27/CCL2/MX1/FGL2
Overexpresion	Coagulation	31	101	0.306931	-0.586134	-2.20417	1.58587e-08	1.13277e-07	4.05411e-08	1089	tags=31%, list=8%, signal=29%	LGMN/CAPN5/F10/HTRA1/BMP1/MSRB2/TIMP1/GSN/CRIP2/C1R/ACOX2/CTSB/ANXA1/ANG/TFPI2/CPQ/LAMP2/CTSK/PROS1/SERPINE1/PLAU/DPP4/CD9/CSRP1/THBS1/F2RL2/A2M/C1S/F3/S100A13/PLAT
Overexpresion	Complement	44	161	0.273292	-0.481833	-1.92088	3.8516e-07	2.40725e-06	8.61543e-07	1637	tags=27%, list=11%, signal=24%	PFN1/C2/XPNPEP1/CFH/LIPA/PRKCD/SH2B3/IRF7/LGMN/HSPA1A/TNFAIP3/CTSD/ATOX1/F10/CCL5/TIMP2/LGALS3/TIMP1/IRF1/CDH13/ANXA5/APOBEC3F/C1R/EHD1/CTSB/ANG/TFPI2/IL6/CPQ/LAMP2/PLAUR/CALM3/CTSL/MSRB1/SERPINE1/DPP4/CSRP1/COL4A2/PRCP/C1S/CTSC/F3/S100A13/PLAT
Overexpresion	Myogenesis	42	155	0.270968	-0.484857	-1.92645	1.87171e-06	1.03984e-05	3.72152e-06	1422	tags=27%, list=10%, signal=25%	MAPK12/SMTN/FHL1/BDKRB2/MYO1C/COL15A1/HSPB8/DMPK/SSPN/MYL6B/DENND2B/NQO1/TPD52L1/ADCY9/SVIL/GSN/AGRN/IGFBP3/PLXNB2/CDH13/ATP6AP1/PDLIM7/SGCD/EFS/MYH9/COL6A2/APP/COL6A3/ITGB5/CNN3/TPM2/AEBP1/COL4A2/MYLK/CRYAB/ITGB1/COX7A1/PPP1R3C/IGFBP7/COL3A1/TAGLN/COL1A1
Overexpresion	Glycolysis	87	173	0.50289	-0.457397	-1.84249	3.31516e-06	1.65758e-05	5.93239e-06	2776	tags=50%, list=19%, signal=41%	PHKA2/GALE/PGAM1/IDUA/DPYSL4/CHPF/VEGFA/CHST4/DDIT4/AK4/PGK1/HSPA5/SOD1/CDK1/HAX1/NOL3/CHST1/ME1/GALK2/NT5E/EXT1/VLDLR/B3GAT1/PPFIA4/TALDO1/ABCB6/CTH/PDK3/PYGL/AKR1A1/CASP6/ALDH7A1/B4GALT2/FAM162A/COPB2/SDC2/PFKP/ISG20/DLD/XYLT2/KIF20A/SDHC/STMN1/PKM/UGP2/GUSB/GPC1/GMPPA/GOT1/B4GALT4/GLCE/CAPN5/GFPT1/GALK1/G6PD/SLC37A4/PMM2/RBCK1/TPST1/VCAN/IL13RA1/GPC4/SDC1/AGRN/IGFBP3/ENO2/B4GALT1/GMPPB/CHPF2/S…
Overexpresion	Hypoxia	58	181	0.320442	-0.455863	-1.85216	5.17338e-06	2.35154e-05	8.41603e-06	1890	tags=32%, list=13%, signal=28%	GPI/PFKP/ISG20/WSB1/CDKN1C/NDST2/FOSL2/XPNPEP1/UGP2/GPC1/ANXA2/INHA/CAVIN3/IDS/CSRP2/ZFP36/SELENBP1/GALK1/TNFAIP3/SLC37A4/CHST3/GPC4/S100A4/IGFBP3/ENO2/ADM/MT2A/CAVIN1/LXN/TPST2/SRPX/IL6/PAM/PLAUR/PGM1/MYH9/NAGK/SERPINE1/SLC2A1/DCN/LOX/ALDOC/CCN2/CAV1/BGN/TMEM45A/P4HA2/CCN1/MT1E/COL5A1/PPP1R3C/F3/TGFBI/P4HA1/KDELR3/ANGPTL4/FOS/TGM2
Knockdown (Untreated) - Group B	Heme Metabolism	79	148	0.533784	-0.428344	-1.66767	1.82673e-05	0.000223774	0.000173058	4594	tags=53%, list=36%, signal=35%	TMEM9B/OSBP2/ALAD/MPP1/TRAK2/CDC27/SIDT2/TFDP2/ICAM4/RAP1GAP/BSG/CCND3/C3/SLC66A2/BLVRB/TOP1/HDGF/MGST3/ATP6V0A1/ADD1/BNIP3L/FBXO7/NNT/GMPS/RCL1/H1-0/HAGH/SEC14L1/MARK3/TNS1/CTNS/PIGQ/CPOX/SLC22A4/SMOX/MARCHF8/SLC6A9/BACH1/UROS/H4C3/RAD23A/LRP10/AGPAT4/BCAM/PPOX/E2F2/BLVRA/P4HA2/ENDOD1/NEK7/TCEA1/MBOAT2/UCP2/HEBP1/GDE1/ALDH6A1/SLC6A8/TENT5C/TSPAN5/PPP2R5B/ALAS2/PICALM/MAP2K3/ABCB6/PGLS/EZH1/SLC2A…
Overexpresion	E2f Targets	71	187	0.379679	0.393052	1.68285	7.26388e-05	0.000302661	0.000108321	3812	tags=38%, list=27%, signal=28%	MYC/PA2G4/PAICS/NUP205/LYAR/NOP56/TBRG4/PPM1D/NOLC1/CSE1L/CDKN1A/POLD2/PPP1R8/CTPS1/AK2/MTHFD2/ILF3/PHF5A/GSPT1/ING3/CTCF/MCM4/MCM7/MCM3/NUP153/IPO7/SMC3/DCTPP1/MAD2L1/NME1/SNRPB/ATAD2/HMGA1/EXOSC8/XPO1/H2AX/PRKDC/PNN/XRCC6/HNRNPD/NUP107/EED/POLE4/TIMELESS/CDC25A/SPC25/CKS1B/CKS2/NCAPD2/USP1/BRMS1L/KPNA2/ZW10/CDKN2C/UBE2S/SLBP/TIPIN/MRE11/MKI67/CDKN3/RFC3/PTTG1/ORC2/DSCC1/ORC6/POP7/STAG1/WDR90/MC…
Overexpresion	G2m Checkpoint	62	190	0.326316	0.38973	1.66949	0.000102914	0.000395824	0.000141663	3153	tags=33%, list=22%, signal=26%	MYC/SQLE/DKC1/ODC1/PRMT5/UCK2/DTYMK/NOLC1/NCL/AMD1/SLC7A5/SMARCC1/TENT4A/ORC5/H2BC12/ABL1/YTHDC1/ILF3/G3BP1/UPF1/GSPT1/KMT5A/CTCF/TLE3/DR1/MCM3/E2F1/MAD2L1/CDC27/CENPA/HMGA1/XPO1/SLC38A1/SAP30/H2AX/RAD23B/RBM14/HNRNPD/PTTG3P/MAP3K20/PURA/CDC25A/ATRX/WRN/CUL1/CKS1B/TNPO2/CKS2/EWSR1/TOP1/KATNA1/NUP98/CHAF1A/TRAIP/MTF2/KPNA2/PRPF4B/CUL5/CDKN2C/UBE2S/SLC7A1/MEIS2
Knockdown (Stress) - Group D	Interferon Alpha Response	20	76	0.263158	0.412564	2.14078	9.27488e-06	0.000426645	0.000370995	776	tags=26%, list=6%, signal=25%	ISG20/IFIT2/SAMD9/DHX58/IRF7/GBP2/TXNIP/IFITM3/DDX60/IRF9/IRF2/NCOA7/CXCL10/HERC6/TRIM26/OGFR/TRIM5/LAMP3/IRF1/CASP1
Overexpresion	Apoptosis	34	133	0.255639	-0.442803	-1.72496	0.000252396	0.000901415	0.000322612	1311	tags=26%, list=9%, signal=23%	IGF2R/TSPO/CD14/ERBB2/MGMT/FEZ1/BCL2L2/TIMP2/LGALS3/TIMP1/IRF1/GSN/HSPB1/ENO2/IFITM3/SOD2/CCND1/NEDD9/ANXA1/IL6/DCN/APP/CD44/DAP/CAV1/GSTM1/IL1B/PEA15/BGN/LMNA/LUM/PDGFRB/IGFBP6/PLAT
Overexpresion	Tnfa Signaling Via Nfkb	41	173	0.236994	0.382753	1.6207	0.000304515	0.00101505	0.000363281	1155	tags=24%, list=8%, signal=22%	LDLR/MYC/SERPINB2/BHLHE40/BMP2/YRDC/TRIB1/IER3/IRS2/KYNU/NAMPT/BTG1/TIPARP/EGR2/EDN1/ATF3/CEBPB/BCL6/NR4A2/NFIL3/JUN/PHLDA1/PTGS2/TGIF1/RHOB/EIF1/PPP1R15A/TNFAIP6/NFE2L2/FJX1/CDKN1A/ETS2/CLCF1/SERPINB8/FOSL1/CEBPD/SQSTM1/JAG1/MAFF/KLF10/DUSP1
Overexpresion	Angiogenesis	10	28	0.357143	-0.656618	-1.96273	0.000380562	0.00118926	0.000425629	1064	tags=36%, list=7%, signal=33%	ITGAV/VCAN/LRPAP1/TIMP1/S100A4/FSTL1/APP/LUM/COL5A2/COL3A1
Overexpresion	Mtorc1 Signaling	52	189	0.275132	0.372926	1.60269	0.00053149	0.00156321	0.000559464	1630	tags=28%, list=11%, signal=25%	INSIG1/LDLR/SCD/FADS1/BHLHE40/ACSL3/SQLE/ADIPOR2/NAMPT/IFRD1/HMGCS1/ACACA/DDIT3/NFIL3/EEF1E1/COPS5/NUP205/HSPA9/CCT6A/PPP1R15A/ETF1/PNP/TPI1/SLC7A5/PSMC6/CDKN1A/HSPD1/PSMD12/HSPA4/STIP1/ELOVL6/MTHFD2/YKT6/SQSTM1/GBE1/GMPS/SLC9A3R1/RRP9/TBK1/RDH11/MCM4/ABCF2/PSMB5/FADS2/POLR3G/UBE2D3/TOMM40/MTHFD2L/SLC2A3/NUFIP1/TXNRD1/ELOVL5
Knockdown (Untreated) - Group B	Inflammatory Response	21	113	0.185841	0.294588	1.61172	0.000234983	0.00230284	0.00178093	975	tags=19%, list=8%, signal=17%	CCL2/ABCA1/CD14/IRF7/CXCL8/ITGA5/FZD5/NAMPT/LAMP3/CD40/KLF6/IRF1/PLAUR/BTG2/SGMS2/IRAK2/HRH1/P2RX7/LCP2/RGS16/HIF1A
Overexpresion	Uv Response Dn	42	137	0.306569	-0.412152	-1.61689	0.000907175	0.00251993	0.00090187	740	tags=31%, list=5%, signal=29%	ANXA4/RXRA/SMAD3/AGGF1/SDC2/DAB2/PTPRM/KCNMA1/CDON/ICA1/ID1/BMPR1A/ANXA2/LPAR1/RBPMS/ERBB2/PPARG/MGMT/TFPI/FZD2/DDAH1/IGFBP5/MAP1B/MGLL/TGFBR2/SLC22A18/SERPINE1/ATP2B4/ADD3/CAV1/PMP22/CAP2/CCN1/MT1E/F3/COL5A2/FBLN5/EFEMP1/PDGFRB/COL3A1/COL1A1/COL1A2
Overexpresion	Allograft Rejection	31	138	0.224638	-0.410267	-1.6097	0.00101778	0.00267838	0.000958577	1819	tags=22%, list=13%, signal=20%	FLNA/ELF4/IL2/GBP2/C2/CD4/IL4/EIF4G3/IRF7/HLA-G/WARS1/IFNAR2/IL4R/AKT1/CCL5/HLA-E/DEGS1/PSMB10/TIMP1/BCAT1/TAPBP/STAT1/HLA-A/IL6/CD47/B2M/CCND3/HLA-DMA/IL1B/CCL2/THY1
Overexpresion	Estrogen Response Late	44	157	0.280255	-0.395519	-1.57494	0.00160038	0.00384618	0.00137653	2130	tags=28%, list=15%, signal=24%	SCARB1/STIL/MOCS2/ALDH3B1/NCOR2/ISG20/IMPA2/CXCL14/DNAJC1/KIF20A/UGDH/ID2/SGK1/HSPB8/CDC20/ZFP36/PTGES/IDH2/COX6C/TPD52L1/TSPAN13/CPE/SEMA3B/GLA/TOB1/DYNLT3/IL6ST/NBL1/PERP/CCND1/ACOX2/RPS6KA2/TFPI2/FARP1/WFS1/PLAAT3/MDK/MYOF/CD9/ATP2B4/CD44/ADD3/CAV1/FOS
Overexpresion	Protein Secretion	30	90	0.333333	-0.448402	-1.65812	0.0016154	0.00384618	0.00137653	2223	tags=33%, list=15%, signal=28%	COPB1/GNAS/AP3S1/COPB2/USO1/VAMP3/ATP1A1/ICA1/SCAMP1/MAPK1/TMX1/AP2S1/RER1/IGF2R/CLTC/AP3B1/SSPN/GLA/ARFGAP3/ERGIC3/SNAP23/SCRN1/STX12/SEC22B/SEC24D/PAM/LAMP2/CAV2/CD63/CTSC
Overexpresion	Il6 Jak Stat3 Signaling	21	66	0.318182	-0.474358	-1.64908	0.0020454	0.00464864	0.00166372	1874	tags=32%, list=13%, signal=28%	CSF2/TYK2/TNFRSF21/LTBR/PDGFC/TNFRSF1B/CD14/IL4R/IL13RA1/ACVRL1/IRF1/IL6ST/STAT1/IRF9/IL6/IL10RB/CD9/CD44/IL1B/A2M/STAT2
Knockdown (Untreated) - Group B	Oxidative Phosphorylation	135	193	0.699482	-0.365922	-1.45449	0.000916801	0.0056154	0.00434274	6366	tags=70%, list=50%, signal=36%	POLR2F/NDUFB2/ATP6V1C1/ATP5MC2/MRPS12/MRPS11/NDUFS3/TIMM10/ATP5PD/UQCR10/ATP5ME/ETFA/TIMM9/NDUFC1/ECH1/COX7C/ACAA2/DLAT/UQCRC1/COX7A2/COX6C/ATP5F1E/ATP5MG/SLC25A5/IDH3G/UQCRC2/NDUFA4/ATP5PO/HADHA/HADHB/NDUFA2/COX8A/UQCR11/NDUFS2/COX4I1/VDAC2/COX6B1/IDH2/ACADVL/ECI1/NDUFB5/CYB5R3/MRPS22/ATP5F1B/ECHS1/MRPL34/OXA1L/NDUFA7/RHOT1/LDHB/ETFB/MRPS15/NDUFB4/NDUFB3/NDUFC2/NDUFB8/BCKDHA/NDUFS8/SUCLG1/MFN2/A…
Knockdown (Untreated) - Group B	Estrogen Response Early	77	178	0.432584	-0.373821	-1.47737	0.000797019	0.0056154	0.00434274	3778	tags=43%, list=29%, signal=31%	AR/IGF1R/FASN/TPBG/MLPH/CXCL12/ADD3/SLC22A5/PDZK1/SLC1A4/DHRS2/SNX24/CLDN7/RAPGEFL1/CCND1/SLC7A5/UNC119/ARL3/SIAH2/CHPT1/OVOL2/FARP1/TGM2/GREB1/ABCA3/AKAP1/WFS1/SYNGR1/IL17RB/FLNB/SLC9A3R1/CANT1/NADSYN1/KCNK5/P2RY2/SLC24A3/INHBB/SCARB1/ABAT/TFF3/PAPSS2/LRIG1/NXT1/SFN/ABLIM1/TJP3/ENDOD1/ELOVL5/OLFM1/ISG20L2/HR/MED24/ADCY9/RAB31/PRSS23/MINDY1/THSD4/ITPK1/CALCR/FHL2/IGFBP4/NCOR2/CLIC3/TPD52L1/SLC2A1…
Knockdown (Untreated) - Group B	Myogenesis	47	115	0.408696	-0.405751	-1.55042	0.000813368	0.0056154	0.00434274	3159	tags=41%, list=25%, signal=31%	TSC2/ACSL1/RB1/PLXNB2/OCEL1/TNNT1/DMPK/APP/TEAD4/CRAT/DTNA/SYNGR2/AGRN/NQO1/ATP6AP1/LARGE1/CFD/SIRT2/MYO1C/COL6A2/ITGB5/NOTCH1/VIPR1/ABLIM1/ITGB4/CAMK2B/ADCY9/FXYD1/SLC6A8/IGFBP7/SPDEF/SMTN/GSN/PTP4A3/TPD52L1/EFS/MAPK12/NAV2/PSEN2/GPX3/SOD3/PC/CACNG1/BIN1/WWTR1/SH2B1/EPHB3
Overexpresion	Dna Repair	47	136	0.345588	0.376603	1.53262	0.00285275	0.00620163	0.00221953	2725	tags=35%, list=19%, signal=28%	CSTF3/RAE1/POLR1D/NELFCD/POLR1C/GTF3C5/POLR2A/SAC3D1/PNP/POLR2D/EIF1B/XPC/ADRM1/ALYREF/ERCC1/NT5C3A/UPF3B/SF3A3/POLR2J/DCTN4/CLP1/POLR2H/ZNF707/RBX1/PDE4B/POLR2F/IMPDH2/NME1/STX3/ERCC3/BOLA2/TAF13/NELFB/BRF2/APRT/POLR3C/NCBP2/SUPT5H/VPS37B/POLE4/SMAD5/MRPL40/DDB2/TSG101/TAF6/AAAS/POM121
Overexpresion	Heme Metabolism	52	165	0.315152	-0.37216	-1.4863	0.00326817	0.00680868	0.00243679	2810	tags=32%, list=20%, signal=26%	C3/MYL4/ASNS/KAT2B/NFE2L1/BLVRB/UBAC1/GDE1/ABCB6/CDR2/TRIM58/CAST/YPEL5/RNF123/TNS1/ALDH6A1/MOSPD1/EPB41/EPOR/PRDX2/MGST3/HEBP1/MARCHF2/MAP2K3/HAGH/SLC10A3/EIF2AK1/CTNS/ENDOD1/GCLM/SNCA/TMEM9B/SLC11A2/SELENBP1/NNT/H4C3/ATP6V0A1/CAT/ARL2BP/PIGQ/CTSB/TRAK2/LAMP2/OPTN/SLC2A1/UROS/LRP10/HBD/SIDT2/CCND3/P4HA2/TENT5C
Overexpresion	Cholesterol Homeostasis	22	62	0.354839	0.446212	1.60298	0.00382473	0.00764947	0.0027377	1932	tags=35%, list=13%, signal=31%	LDLR/SCD/FASN/FABP5/SQLE/FDFT1/HMGCS1/ATF3/NFIL3/TP53INP1/ATXN2/ERRFI1/NSDHL/JAG1/HSD17B7/FADS2/CHKA/MVD/LSS/CPEB2/FDPS/PCYT2
Knockdown (Untreated) - Group B	Kras Signaling Dn	30	91	0.32967	-0.413807	-1.54856	0.00212123	0.0115489	0.00893147	2733	tags=33%, list=21%, signal=26%	MSH5/MACROH2A2/SGK1/SNCB/GTF3C5/SLC25A23/SIDT1/GP1BA/INSL5/PDK2/ATP6V1B1/COPZ2/TENT5C/ABCG4/SNN/CELSR2/CLDN8/CAMK1D/TNNI3/IGFBP2/FGGY/MEFV/CACNG1/PDE6B/PRODH/YPEL1/CHST2/DTNB/SERPINA10/TCF7L1
Knockdown (Untreated) - Group B	Apoptosis	22	126	0.174603	0.255837	1.44717	0.00247934	0.0121488	0.00939538	961	tags=17%, list=7%, signal=16%	CD14/ANXA1/PMAIP1/TNF/CASP4/ISG20/CASP1/BMF/DDIT3/HMOX1/GADD45A/IRF1/ATF3/JUN/AIFM3/TXNIP/BTG2/SQSTM1/BCL2L11/FAS/BCL10/SC5D
Knockdown (Stress) - Group D	Oxidative Phosphorylation	134	192	0.697917	-0.373965	-1.45012	0.000722581	0.0166194	0.0144516	6423	tags=70%, list=51%, signal=35%	PDHB/POLR2F/SURF1/TIMM9/NDUFB3/VDAC2/PRDX3/NDUFA8/ATP5PD/OGDH/ATP5PF/CYCS/HADHA/UQCRC2/CYB5R3/ISCU/SDHC/ATP5F1D/TIMM8B/ISCA1/PDP1/UQCRFS1/SLC25A5/POR/NDUFC2/RHOT2/SLC25A11/MRPL34/ATP5MC3/MRPS22/SUCLG1/CYC1/VDAC3/CS/AIFM1/TIMM10/NDUFA1/PMPCA/MTX2/ATP6V0E1/ATP5F1A/ACADVL/TOMM22/ATP6AP1/ACAA1/HSD17B10/COX5A/COX8A/MRPS15/TOMM70/IDH3B/NDUFB2/DLD/IDH1/NDUFB6/MFN2/GPX4/ATP5F1E/ACADM/FH/COX4I1/OAT/PDHA1/…
Overexpresion	Il2 Stat5 Signaling	47	166	0.283133	-0.358036	-1.43241	0.00923808	0.0177655	0.00635819	2206	tags=28%, list=15%, signal=24%	SMPDL3A/SOCS1/NDRG1/ANXA4/SWAP70/GALM/CSF2/PRNP/NCS1/CDKN1C/TNFRSF21/ICOS/EEF1AKMT1/PLPP1/ALCAM/IGF2R/ST3GAL4/MYO1C/TNFRSF1B/CDCP1/ITGAV/SNX14/AHNAK/IL4R/P2RX4/HIPK2/DHRS3/CD81/NFKBIZ/DENND5A/MUC1/IFITM3/SCN9A/ITGAE/GABARAPL1/GLIPR2/COL6A1/CD44/CCND3/F2RL2/TWSG1/CKAP4/ECM1/P4HA1/ADAM19/TGM2/FGL2
Knockdown (Stress) - Group D	G2m Checkpoint	118	192	0.614583	-0.365895	-1.41883	0.0016743	0.0192545	0.016743	5662	tags=61%, list=45%, signal=35%	MYBL2/TOP1/TNPO2/TENT4A/E2F2/PLK1/STIL/KIF22/CENPA/KIF11/GINS2/ODF2/MCM3/UBE2S/SMC4/SLC7A1/SFPQ/PRMT5/PRPF4B/NDC80/ATF5/RBM14/PTTG1/KMT5A/CDC25B/TACC3/CENPE/RBL1/KPNA2/AURKB/RAD23B/MCM5/CDC45/H2AZ1/CDKN3/PTTG3P/TTK/PDS5B/FANCC/POLE/PAFAH1B1/HMGA1/TFDP1/MT2A/RPS6KA5/CHAF1A/CCND1/H2AZ2/TOP2A/CCNF/AURKA/RACGAP1/NCL/HSPA8/CENPF/SMAD3/CCNB2/TPX2/CDKN1B/H2AX/SNRPD1/TLE3/TROAP/E2F3/XPO1/UBE2C/SRSF10/DBF…
Knockdown (Stress) - Group D	Uv Response Dn	49	108	0.453704	-0.409309	-1.50833	0.00146168	0.0192545	0.016743	3466	tags=45%, list=27%, signal=33%	RXRA/IRS1/SMAD3/VAV2/CDKN1B/ATXN1/BCKDHB/NFIB/PIAS3/SERPINE1/SCAF8/APBB2/CAP2/ATP2B4/PTEN/MT1E/NEK7/IGF1R/SNAI2/LPAR1/SPOP/DYRK1A/RBPMS/EFEMP1/TJP1/SYNJ2/PEX14/SMAD7/PDLIM5/LAMC1/ARHGEF9/PIK3CD/SDC2/MAP2K5/ATRN/SCHIP1/BMPR1A/ATP2C1/KCNMA1/ANXA4/TGFBR3/DLG1/CDC42BPA/GJA1/PRKCE/ACVR2A/MAPK14/DDAH1/ATRX
Overexpresion	Xenobiotic Metabolism	27	155	0.174194	-0.358943	-1.42616	0.0109962	0.0203634	0.00728796	1294	tags=17%, list=9%, signal=16%	UGDH/COMT/ID2/PYCR1/NQO1/PTGES/NINJ1/F10/TPST1/PSMB10/BCAT1/CAT/GABARAPL1/APOE/ACOX2/MT2A/PMM1/DHRS1/JUP/PTGDS/PROS1/CYB5A/SERPINE1/ACP2/ALDH2/HSD17B2/FBLN1
Overexpresion	Unfolded Protein Response	32	105	0.304762	0.373423	1.4637	0.0130721	0.0233431	0.00835436	1580	tags=30%, list=11%, signal=27%	GEMIN4/EIF4E/DKC1/ATF3/NHP2/DDX10/DCP1A/EXOSC5/CEBPB/EIF4A1/NOP56/EXOSC4/IMP3/HSPA9/TARS1/NOLC1/KHSRP/SLC7A5/ATF4/MTREX/CNOT4/STC2/FUS/EIF4A3/MTHFD2/RRP9/EXOSC9/BANF1/CNOT2/EXOSC10/SDAD1/CEBPG
Knockdown (Untreated) - Group B	G2m Checkpoint	96	190	0.505263	-0.345414	-1.37155	0.00557336	0.0248268	0.0192001	4744	tags=51%, list=37%, signal=32%	HMGB3/CDKN3/CENPE/PAFAH1B1/MCM3/NCL/SMC2/PRMT5/STMN1/ODF2/KIF2C/SMC4/TPX2/CDC27/PLK4/ABL1/SMARCC1/TFDP1/MCM2/TLE3/EZH2/MCM6/TOP1/PLK1/KMT5A/CDC25B/HSPA8/RBM14/AURKB/MEIS1/TOP2A/TMPO/PRC1/FANCC/GINS2/CDC20/E2F3/SS18/CENPA/KIF22/SQLE/KIF4A/CDC45/NDC80/CCND1/RAD23B/NUSAP1/SLC7A5/TACC3/UBE2C/SMC1A/AURKA/HMGA1/E2F1/JPT1/TTK/MCM5/LIG3/HMMR/SAP30/INCENP/RAD54L/RPS6KA5/CBX1/SUV39H1/KIF20B/DTYMK/FOXN3/NOT…
Knockdown (Untreated) - Group B	Estrogen Response Late	73	176	0.414773	-0.346225	-1.36574	0.00647108	0.0264236	0.020435	3620	tags=41%, list=28%, signal=30%	TPBG/ACOX2/GINS2/LAMC2/CXCL12/CDC20/ADD3/SLC22A5/PDZK1/TST/ST14/SLC1A4/CPE/PRLR/DHRS2/RAPGEFL1/CCND1/DCXR/FGFR3/SLC7A5/ARL3/SIAH2/SLC2A8/CHPT1/OVOL2/FARP1/FABP5/ABCA3/SGK1/WFS1/IL17RB/FLNB/SLC9A3R1/PTGER3/KCNK5/LARGE1/LLGL2/SLC24A3/SCARB1/IMPA2/TFF3/PAPSS2/NXT1/SFN/TSPAN13/CDC6/TJP3/SLC29A1/ELOVL5/PKP3/OLFM1/HR/RABEP1/RAB31/DLG5/PRSS23/ITPK1/CALCR/NMU/IGFBP4/NCOR2/CLIC3/PDCD4/ASS1/TPD52L1/CELSR2/…
Overexpresion	Oxidative Phosphorylation	51	188	0.271277	0.307436	1.31675	0.0181396	0.0312752	0.0111932	2428	tags=27%, list=17%, signal=23%	MRPS12/MRPS30/CYC1/PDK4/GRPEL1/HSPA9/UQCRFS1/NDUFS8/COX11/NDUFS3/AFG3L2/MRPS15/IDH3B/MRPS11/MFN2/ECHS1/ATP5F1B/MRPL35/PDHX/SUPV3L1/MDH2/NDUFA9/MRPS22/LRPPRC/GOT2/TOMM22/POLR2F/ISCU/TIMM9/NDUFV2/PMPCA/OXA1L/COX10/CS/SDHA/MTRF1/SDHB/TIMM10/AIFM1/ATP5MC2/CYCS/ATP5MC1/ABCB7/HTRA2/IDH1/DLST/ATP5ME/COX7A2L/TOMM70/ATP5F1A/COX6A1
Knockdown (Untreated) - Group B	Mitotic Spindle	94	180	0.522222	-0.337782	-1.33615	0.00939749	0.0354213	0.0273935	5175	tags=52%, list=40%, signal=32%	EZR/SEPTIN9/RALBP1/MYH9/LMNB1/RASA2/NF1/CDC42/DLG1/CLASP1/CENPE/PAFAH1B1/KIF2C/AKAP13/SMC4/TPX2/CDC27/ABL1/PKD2/PCM1/ABR/MAPRE1/RAB3GAP1/RASA1/PLK1/ARHGEF3/TOP2A/PRC1/UXT/BCAR1/MAP3K11/CKAP5/KIF22/KIF4A/NDC80/CTTN/NUSAP1/ECT2/FARP1/SMC1A/ARHGAP10/KIF3B/TBCD/AURKA/CAPZB/KLC1/TUBA4A/TTK/DOCK2/FLNB/CDK5RAP2/EPB41L2/ITSN1/INCENP/RAPGEF6/ANLN/GEMIN4/KIF20B/TAOK2/NOTCH2/CENPF/LLGL1/CDC42EP1/BUB1/CD2AP/…
Overexpresion	Inflammatory Response	34	142	0.239437	-0.349843	-1.37544	0.0233103	0.0388505	0.0139044	1761	tags=24%, list=12%, signal=21%	SLC31A2/PCDH7/EIF2AK2/SLC31A1/EMP3/PDPN/TNFRSF1B/LPAR1/CD14/SLC4A4/IRF7/SLC11A2/IL4R/BST2/SELENOS/P2RX4/AXL/CCL5/TIMP1/IRF1/TAPBP/IL7R/SEMA4D/ADM/IL6/PLAUR/ITGA5/LY6E/SERPINE1/CD82/IL1B/F3/CCL2/IFITM1
Overexpresion	Estrogen Response Early	33	162	0.203704	-0.334987	-1.33744	0.0258079	0.0416256	0.0148976	1241	tags=20%, list=9%, signal=19%	TUBB2B/SLC1A1/HSPB8/SNX24/RHOBTB3/PTGES/TPD52L1/SEMA3B/GLA/ADCY9/DHRS3/SVIL/TOB1/DYNLT3/HES1/MUC1/IL6ST/B4GALT1/OLFML3/NBL1/SYNGR1/CCND1/RPS6KA2/NADSYN1/FARP1/WFS1/PLAAT3/MYOF/SLC2A1/CD44/ADD3/FOS/TGM2
Knockdown (Stress) - Group D	Mitotic Spindle	78	176	0.443182	-0.361833	-1.39661	0.00466628	0.0429297	0.0373302	4099	tags=44%, list=32%, signal=30%	YWHAE/TTK/CDC42EP2/PAFAH1B1/SUN2/RALBP1/CLASP1/TUBGCP2/BIN1/ARHGEF3/TOP2A/AURKA/ARHGEF7/RACGAP1/KIFAP3/ATG4B/ALS2/SAC3D1/CENPF/CCNB2/TPX2/MYO9B/CAPZB/CYTH2/ECT2/CDK5RAP2/KIF4A/NIN/CTTN/KIF23/FLNB/RASA1/ABI1/GSN/PCM1/BIRC5/ABL1/KIF15/CD2AP/NF1/LRPPRC/INCENP/LLGL1/TBCD/MYO1E/ANLN/VCL/UXT/NEK2/TIAM1/TRIO/DLGAP5/NCK1/RAPGEF5/FBXO5/FLNA/CLIP2/PDLIM5/BUB1/BCR/LMNB1/CEP57/RABGAP1/PREX1/PXN/TLK1/KIF3B/DL…
