# Supplementary material for: TP53mutation–associated and copy number–dependent KDM7A-DT expression affects DNA repair and promotes invasive breast cancer progression
Source: Research Square preprint supplement (doi:10.21203/rs.3.rs-1896103/v3), 2022-09-27
Supplement: Supplementary file 5 [file 0bf6e78585c3eaf98290f7c0.xlsx]

## Sheet: ST5
Table S5. Geneset Enrichment Analysis for GO Terms and KEGG pathways in differential expressed genes after KDM7A-DT overexpression in firobllasts cells
The gene set enrichment analysis was carried out using GSEA statistics.The primary result is the enrichment score (ES), which reflects the degree to which a gene set is overrepresented at the top or bottom of a ranked list of genes. A positive ES indicates gene set enrichment at the top of the ranked list; a negative ES indicates gene set enrichment at the bottom of the ranked list.Normalized Enr…
ID	Description	genes subset	set Size	gene ratio	enrichment Score	NES	p-value	p.adjust	rank	leading_edge	core_enrichment
GO:0022618	ribonucleoprotein complex assembly	68	69	0.985507	0.45746	3.0025	0.00334448	0.0137074	1409	tags=99%, list=54%, signal=46%	4839/50628/6128/10419/84154/23212/22907/55299/8664/51116/23369/708/10569/1975/26284/79833/10146/255967/51187/10713/5433/56949/23451/6732/8161/6122/6147/91746/64963/51386/8662/8666/8661/25929/6311/11052/10480/51388/6193/29093/29883/51154/9733/8607/10946/10291/83939/3326/27339/8667/27341/10978/1207/4848/9326/1654/10856/26747/55794/27316/6628/6209/26065/8233/55052/54496/55239/80153
GO:0071826	ribonucleoprotein complex subunit organization	70	72	0.972222	0.449341	2.99459	0.00330033	0.0137074	1409	tags=97%, list=54%, signal=46%	4839/50628/6128/10419/84154/23212/22907/55299/8664/51116/23369/708/10569/4528/1975/26284/79833/10146/255967/51187/10713/5433/56949/23451/6732/8161/6122/6147/91746/64963/51386/8662/8666/8661/25929/6311/11052/10480/51388/6193/29093/24144/29883/51154/9733/8607/10946/10291/83939/3326/27339/8667/27341/10978/1207/4848/9326/1654/10856/26747/55794/27316/6628/6209/26065/8233/55052/54496/55239/80153
GO:0006405	RNA export from nucleus	49	53	0.924528	0.422608	2.55731	0.00307692	0.0137074	1362	tags=92%, list=53%, signal=45%	26993/29107/8480/23212/8106/23049/23165/84946/3267/9887/10569/81929/57187/5433/51808/9984/5901/6059/22794/81608/91746/55677/129401/57510/9775/23636/84271/5976/11052/4927/26019/3178/29072/65109/10482/23381/51068/9972/4928/55153/7884/29890/6209/9631/1977/199746/1984/8021/11338
GO:0022613	ribonucleoprotein complex biogenesis	145	159	0.91195	0.482681	3.93802	0.00512821	0.0161412	1278	tags=91%, list=49%, signal=49%	4839/9188/50628/6229/54663/10153/54881/1736/6128/705/25983/51491/10419/84154/285855/26156/153443/23160/1662/23212/22907/25926/55299/8664/64216/5036/23411/56915/51116/55646/23560/84128/10528/84946/23369/54512/55272/27079/708/10569/51106/55759/9221/55651/80135/1975/26284/55003/79833/57647/10146/55695/26574/255967/51187/10713/51010/5433/92856/5901/23378/6059/10360/56949/54606/23451/51018/6732/57418/…
GO:0140053	mitochondrial gene expression	50	55	0.909091	0.559308	3.45889	0.00302115	0.0137074	1017	tags=91%, list=39%, signal=56%	6183/10884/60488/64216/51116/54460/79590/54148/26589/708/54802/2309/10240/4528/26284/84881/64983/28973/60493/219927/64960/65080/80324/7284/51069/51023/57129/84311/54534/64963/5442/64969/65005/10352/51073/29074/116541/51318/283459/28977/55168/51253/55173/29093/6832/64979/64949/11222/56945/51258
GO:0051168	nuclear export	58	65	0.892308	0.320308	2.07358	0.00318471	0.0137074	1362	tags=89%, list=53%, signal=43%	26993/29107/8480/1959/23212/8106/23049/23165/84946/3267/9887/3313/10569/81929/57187/1434/5433/51808/9984/5901/6059/22794/81608/91746/55696/55677/129401/57510/9775/23636/84271/5976/11052/4927/5494/64328/26019/3178/29072/56478/65109/8498/10482/23381/51068/9972/4928/55153/7884/29890/10541/6209/9631/1977/199746/1984/8021/11338
GO:0006611	protein export from nucleus	54	61	0.885246	0.310652	1.9678	0.00309598	0.0137074	1362	tags=89%, list=53%, signal=43%	26993/29107/8480/1959/23212/8106/23049/23165/84946/3267/9887/3313/10569/81929/57187/1434/5433/9984/5901/6059/22794/81608/91746/55696/55677/129401/57510/9775/23636/84271/5976/4927/5494/64328/26019/29072/65109/8498/10482/23381/51068/9972/4928/55153/7884/29890/10541/6209/9631/1977/199746/1984/8021/11338
GO:0009101	glycoprotein biosynthetic process	47	54	0.87037	-0.517877	-2.77509	0.00149701	0.0102666	1005	tags=87%, list=39%, signal=54%	6484/7358/2801/2135/8702/26035/8869/27090/57134/2673/11253/8985/10905/9445/5373/9528/53947/6184/1462/113189/25825/79690/4582/5238/2683/2132/79947/5372/54480/29071/160418/23275/66008/55858/6185/54360/7991/23753/79796/1634/81618/1650/1464/11227/23385/633/58505
GO:0006403	RNA localization	77	89	0.865169	0.352642	2.47544	0.00353357	0.0137074	1362	tags=87%, list=53%, signal=42%	7014/1736/26993/29107/8480/23212/8106/23049/23165/84946/3267/9887/10569/81929/10576/23144/55651/908/10574/57187/51010/5433/51808/8570/9984/5901/6059/22794/81608/6950/91746/2091/55677/10694/129401/57510/25909/9775/22948/23636/65110/29074/51602/84271/5976/170506/6311/11052/4927/56648/26019/3178/29072/23299/65109/8607/3297/10482/23381/220988/10128/51068/9972/5394/4928/9326/55153/7884/10856/29890/620…
GO:0000956	nuclear-transcribed mRNA catabolic process	43	50	0.86	0.406236	2.44907	0.00294118	0.0137074	1191	tags=86%, list=46%, signal=47%	6159/6229/6128/6173/55802/56915/55629/23049/5520/54512/9887/2107/255967/51010/5433/5515/22794/4850/6122/201626/6147/9775/65110/6218/5976/6231/170506/6132/6138/2935/6193/26019/29883/51154/5393/65109/4849/23381/6202/25904/4848/23016/5394
GO:0006352	DNA-templated transcription, initiation	46	54	0.851852	0.364287	2.22456	0.00299401	0.0137074	1279	tags=85%, list=49%, signal=44%	4929/64216/10155/3725/9328/9533/5430/3516/8493/902/2908/5433/10001/9519/5706/1026/6877/54700/6874/9794/51773/5442/64425/22938/5704/8061/126382/170506/5431/6662/6879/6878/9774/5439/581/860/25937/9442/84246/5914/5437/5435/2101/6597/29959/6257
GO:0031503	protein-containing complex localization	57	67	0.850746	0.316579	2.07051	0.00328947	0.0137074	1405	tags=85%, list=54%, signal=40%	1948/7014/26993/29107/8480/23212/8106/23049/23165/84946/3267/9887/10569/81929/57187/5433/9984/5901/6059/22794/55920/81608/91746/55677/129401/9775/23636/84271/4218/5976/2288/4927/10243/26019/5108/6103/29072/65109/10482/23381/8976/51068/9972/4928/55153/7884/29890/1627/6209/9631/1977/199746/1984/8021/11338/2060/6830
GO:0009100	glycoprotein metabolic process	54	64	0.84375	-0.480918	-2.70695	0.00144509	0.0102666	1005	tags=84%, list=39%, signal=53%	6484/7358/2801/3423/2135/8702/26035/8869/27090/57134/2673/11253/8985/23213/10905/9445/5373/9528/53947/6184/1462/55741/113189/25825/5589/79690/4582/5238/2683/2132/79947/5372/54480/29071/160418/23275/66008/55858/6185/54360/7991/23753/79796/1634/3074/81618/4126/1650/1464/11227/23385/633/58505/6448
GO:0051028	mRNA transport	48	57	0.842105	0.335097	2.08749	0.00302115	0.0137074	1362	tags=84%, list=53%, signal=41%	26993/29107/8480/8106/23049/23165/3267/9887/10569/81929/23144/57187/5433/8570/9984/22794/81608/91746/55677/129401/25909/9775/23636/65110/84271/5976/4927/56648/26019/3178/29072/23299/65109/3297/10482/23381/220988/10128/9972/4928/7884/29890/9631/1977/199746/1984/8021/11338
GO:0006281	DNA repair	73	87	0.83908	0.301895	2.10435	0.00352113	0.0137074	1392	tags=84%, list=54%, signal=40%	56647/7014/2070/23411/9960/10155/121642/2033/23049/10987/2956/5430/902/5433/56949/84126/23244/7508/4913/57599/10973/2521/55611/5886/25836/51588/11198/25/4287/2547/5976/493861/5431/51720/1647/51366/9557/10450/24144/56893/29072/7323/5965/133746/407006/8607/5439/3297/5378/6996/84268/27339/8846/25988/2067/9100/5437/9978/5435/56897/10038/10856/91875/1054/353497/9112/2071/7405/5425/988/10524/50485/7874
GO:0050657	nucleic acid transport	61	73	0.835616	0.319509	2.14793	0.00326797	0.0137074	1362	tags=84%, list=53%, signal=41%	7014/26993/29107/8480/23212/8106/23049/23165/84946/3267/9887/10569/81929/23144/57187/5433/51808/8570/9984/5901/6059/22794/81608/91746/55677/129401/57510/25909/9775/23636/65110/29074/84271/5976/6311/11052/4927/56648/26019/3178/29072/23299/65109/3297/10482/23381/220988/10128/51068/9972/4928/55153/7884/29890/6209/9631/1977/199746/1984/8021/11338
GO:0050658	RNA transport	61	73	0.835616	0.319509	2.14793	0.00326797	0.0137074	1362	tags=84%, list=53%, signal=41%	7014/26993/29107/8480/23212/8106/23049/23165/84946/3267/9887/10569/81929/23144/57187/5433/51808/8570/9984/5901/6059/22794/81608/91746/55677/129401/57510/25909/9775/23636/65110/29074/84271/5976/6311/11052/4927/56648/26019/3178/29072/23299/65109/3297/10482/23381/220988/10128/51068/9972/4928/55153/7884/29890/6209/9631/1977/199746/1984/8021/11338
GO:0051236	establishment of RNA localization	61	73	0.835616	0.319509	2.14793	0.00326797	0.0137074	1362	tags=84%, list=53%, signal=41%	7014/26993/29107/8480/23212/8106/23049/23165/84946/3267/9887/10569/81929/23144/57187/5433/51808/8570/9984/5901/6059/22794/81608/91746/55677/129401/57510/25909/9775/23636/65110/29074/84271/5976/6311/11052/4927/56648/26019/3178/29072/23299/65109/3297/10482/23381/220988/10128/51068/9972/4928/55153/7884/29890/6209/9631/1977/199746/1984/8021/11338
GO:0051276	chromosome organization	176	211	0.834123	0.316535	2.74647	0.00595238	0.0169942	1392	tags=83%, list=54%, signal=42%	4609/5514/7014/1736/26993/2070/8480/10419/5977/6294/23212/22907/83743/5609/1105/54665/51322/23411/9960/604/10155/2648/54971/2033/23049/10987/2956/9887/57459/23429/23314/81929/6418/10576/8289/5245/8493/55651/51742/6018/908/10574/2908/10146/25942/6046/3720/10196/22985/8019/54984/5901/23378/10360/64682/116447/23558/79003/6599/6732/57050/23244/6950/221037/10943/79142/6877/51780/83746/6720/7508/54433/…
GO:0051169	nuclear transport	81	98	0.826531	0.280093	2.02616	0.00369004	0.0138919	1362	tags=83%, list=53%, signal=41%	5514/50628/26993/29107/8480/1959/23212/8106/5743/10155/23049/23165/84946/3267/9887/3313/10569/81929/9221/79833/57187/1434/5433/51808/9984/5901/6059/22794/5936/1026/81608/26263/23633/91746/55696/5295/55677/25929/129401/57510/9775/23636/65110/84271/5976/11052/4927/5494/51366/64328/55027/26019/3178/29072/56478/65109/8498/10482/23381/51194/84268/5501/8815/51068/10527/9972/4928/5571/55153/7884/29890/6…
GO:0006913	nucleocytoplasmic transport	80	97	0.824742	0.278425	1.98765	0.00371747	0.013911	1362	tags=82%, list=53%, signal=41%	5514/50628/26993/29107/8480/1959/23212/8106/5743/10155/23049/23165/84946/3267/9887/3313/10569/81929/9221/79833/57187/1434/5433/51808/9984/5901/6059/22794/5936/1026/81608/26263/23633/91746/55696/5295/55677/25929/129401/57510/9775/23636/65110/84271/5976/11052/4927/5494/51366/64328/55027/26019/3178/29072/56478/65109/8498/10482/23381/51194/84268/5501/51068/10527/9972/4928/5571/55153/7884/29890/6628/1…
GO:0000209	protein polyubiquitination	49	60	0.816667	0.274523	1.73597	0.00623053	0.0174545	1439	tags=82%, list=56%, signal=37%	57161/55905/7337/29116/25820/5695/7326/64682/84085/5706/26263/79791/10210/5718/25831/63893/7328/7322/80829/55611/5694/6477/91694/5704/81847/51366/867/6047/9810/7323/997/25793/5689/5987/23608/27339/26145/9861/5693/9978/8945/26234/2295/5710/127544/9690/6468/6049/55294
GO:0040029	regulation of gene expression, epigenetic	64	79	0.810127	0.35151	2.39739	0.00357143	0.0137074	1259	tags=81%, list=49%, signal=43%	9188/8480/64783/23411/10155/2648/2033/23165/9698/9533/5430/23369/10209/81929/8289/8493/51742/25942/3720/5433/5901/23378/65080/5936/23451/8087/23558/10943/91746/144233/5511/129401/57510/64425/23636/5976/5431/4927/84759/29883/54107/84444/693224/10664/407006/5439/10514/5987/6996/80314/23409/10978/1487/9972/5437/57673/5394/4928/5435/9031/22880/63925/648/29890
GO:0006325	chromatin organization	108	134	0.80597	0.304913	2.39005	0.00452489	0.0152417	1328	tags=81%, list=51%, signal=41%	4609/26993/2070/10419/5977/6294/83743/1105/54665/51322/23411/9960/604/10155/2648/54971/2033/57459/23429/23314/6418/8289/5245/8493/51742/6018/2908/25942/6046/3720/10196/8019/23378/10360/23558/6599/6732/57050/221037/10943/6877/51780/83746/6720/2091/23741/51773/55677/5929/55611/3276/25836/11198/196528/22938/1106/3054/6662/6879/29994/51720/84759/51366/9557/6878/54880/6832/80335/54556/9733/29072/9810/…
GO:0016458	gene silencing	45	56	0.803571	0.323238	2.00026	0.00302115	0.0137074	1239	tags=80%, list=48%, signal=43%	8480/23411/10155/23165/9698/5430/23369/81929/8289/8493/25942/5433/5901/23378/65080/5936/8087/10943/144233/5511/129401/57510/23636/5431/4927/84759/29883/54107/84444/693224/407006/5439/4849/25904/23409/10978/1487/9972/5437/4848/57673/4928/5435/22880/648
GO:0090305	nucleic acid phosphodiester bond hydrolysis	44	55	0.8	0.391353	2.42022	0.00302115	0.0137074	1191	tags=80%, list=46%, signal=44%	1479/64782/55802/23212/56915/55629/54512/55651/51585/10146/83940/255967/51010/90806/65080/51728/79897/79042/81608/1774/10799/201626/28987/7508/4913/5511/81887/79707/10171/10557/64852/11052/9557/29883/5393/581/3297/2021/2067/54913/4848/23016/9978/5394
GO:0015931	nucleobase-containing compound transport	66	83	0.795181	0.271286	1.8625	0.00348432	0.0137074	1362	tags=80%, list=53%, signal=39%	7014/26993/29107/8480/23212/8106/23049/60386/23165/84946/3267/9887/10569/81929/23144/57187/5433/51808/8570/9984/5901/6059/22794/81608/91746/55677/129401/57510/25909/9775/23636/65110/29074/84271/84912/5976/6311/11052/4927/56648/26019/3178/29072/23299/65109/3297/10482/23381/220988/10128/51068/55315/9972/55186/4928/55153/7884/29890/6209/9631/114789/1977/199746/1984/8021/11338
GO:0032446	protein modification by small protein conjugation	133	174	0.764368	0.222082	1.85838	0.0104712	0.025449	1425	tags=76%, list=55%, signal=37%	57161/8480/7965/1959/51322/23411/55905/10155/23560/23165/7337/55527/29116/23429/84541/81929/5581/25820/10296/5695/10016/23640/553115/8805/51070/10196/4780/54984/7326/64682/84085/5706/122809/4850/51530/26263/79791/10210/140459/5718/79142/91107/25831/57599/26054/63893/7328/9529/55182/7322/84259/10059/51592/80829/129401/55611/5694/9817/23636/57820/51588/6477/7329/25/91694/5704/81847/51506/89122/5480…
GO:0016569	covalent chromatin modification	68	89	0.764045	0.283563	1.99052	0.00353357	0.0137074	1273	tags=76%, list=49%, signal=40%	26993/2070/10419/5977/1105/51322/23411/9960/604/10155/2648/2033/23429/6418/5245/51742/6018/25942/3720/10196/23558/221037/10943/6877/51780/6720/2091/23741/51773/55677/5929/55611/3276/25836/22938/3054/6879/51720/84759/51366/54880/80335/54556/9733/29072/9810/54107/84444/10664/8607/123169/11091/10270/80314/7404/10902/1487/10765/57673/9031/8864/22880/63925/648/10856/9739/25855/23476
GO:0033044	regulation of chromosome organization	55	72	0.763889	0.288023	1.9195	0.00330033	0.0137074	1273	tags=76%, list=49%, signal=40%	4609/5514/7014/1736/26993/5609/23411/604/10155/2648/23049/9887/6418/10576/908/10574/25942/3720/54984/64682/23558/6950/6720/26054/23741/55677/10694/55611/22948/25836/22938/5976/170506/6879/51366/54880/3178/9733/6047/9810/3184/10664/10270/23381/25913/11011/56984/2067/1487/5394/22880/63925/10856/9739/23476
GO:0016567	protein ubiquitination	116	153	0.75817	0.212489	1.74094	0.00966184	0.0240526	1420	tags=76%, list=55%, signal=36%	57161/7965/51322/23411/55905/10155/23560/7337/55527/29116/23429/84541/5581/25820/10296/5695/10016/23640/553115/8805/51070/10196/4780/54984/7326/64682/84085/5706/122809/4850/51530/26263/79791/10210/140459/5718/79142/91107/25831/57599/63893/7328/9529/55182/7322/84259/10059/51592/80829/55611/5694/9817/57820/6477/25/91694/5704/81847/89122/54800/51255/84759/51366/81559/29979/80124/4799/10489/54880/867…
GO:0016570	histone modification	65	86	0.755814	0.272881	1.89106	0.0035461	0.0137074	1273	tags=76%, list=49%, signal=40%	26993/2070/10419/5977/51322/23411/9960/604/2648/2033/23429/6418/5245/51742/6018/25942/3720/10196/23558/221037/10943/6877/51780/6720/2091/23741/51773/55677/5929/55611/3276/25836/22938/3054/6879/51720/84759/51366/54880/80335/54556/9733/29072/9810/54107/84444/10664/8607/123169/11091/10270/80314/7404/10902/1487/10765/57673/9031/8864/63925/648/10856/9739/25855/23476
GO:0016579	protein deubiquitination	40	53	0.754717	0.340935	2.06309	0.00307692	0.0137074	1172	tags=75%, list=45%, signal=42%	4609/55252/55432/9960/2648/2033/10987/84132/5695/10713/84640/5706/54726/5718/57599/11047/55611/5694/5886/9817/9146/4287/5704/3054/51720/9097/220213/23032/80124/9736/9733/9101/8607/54764/5689/221937/9861/9100/3607/5693
GO:0043624	cellular protein complex disassembly	46	63	0.730159	0.367971	2.33991	0.00310559	0.0137074	1022	tags=73%, list=40%, signal=45%	6183/10884/60488/51116/54460/79590/54148/26589/10240/26284/57026/2107/64983/28973/6059/219927/64960/65080/51069/51023/89795/57129/84311/157922/54534/64963/64969/65005/51073/29074/116541/51318/28977/55168/5976/51253/2935/55173/56648/29093/64979/64949/11222/56945/51258/3796
GO:0006412	translation	121	166	0.728916	0.398561	3.28412	0.0052356	0.0163453	1018	tags=73%, list=39%, signal=47%	6159/6229/6183/6128/8890/10884/6173/7965/25983/7555/60488/56919/8664/5036/51116/23367/1973/54460/9521/10987/79590/54148/26589/9698/23369/23185/54517/10209/708/84541/2309/10240/9221/4528/1975/23645/4691/26284/84881/10131/2107/54938/51187/8872/64983/28973/5433/8570/6059/22794/219927/64960/468/51441/65080/5936/8087/7284/51069/10289/113251/51023/23173/6122/57129/6147/84311/54534/64963/23/51386/8662/4…
GO:0006396	RNA processing	196	270	0.725926	0.439084	4.05225	0.00680272	0.0186589	1007	tags=73%, list=39%, signal=50%	4839/9188/50628/6229/10656/54663/54881/1736/1479/26993/705/25983/10419/84154/285855/64783/26156/153443/6651/23160/6294/23524/1662/10992/23212/25926/4670/8106/64216/5036/23411/56915/55621/55646/23560/9698/9667/112858/84128/1859/10528/5430/23369/54517/1665/3187/54512/55272/27079/708/10569/51106/54802/3189/55759/10081/23144/9221/55651/6627/51585/80135/79833/84881/57647/902/57187/55695/255967/10713/5…
GO:0070646	protein modification by small protein removal	41	57	0.719298	0.316896	1.97411	0.00302115	0.0137074	1172	tags=72%, list=45%, signal=40%	4609/55252/55432/9960/2648/2033/10987/84132/5695/10713/84640/5706/54726/5718/57599/11047/26054/55611/5694/5886/9817/9146/4287/5704/3054/51720/9097/220213/23032/80124/9736/9733/9101/8607/54764/5689/221937/9861/9100/3607/5693
hsa03013	RNA transport	38	53	0.716981	0.466761	2.89491	0.0031746	0.0126984	844	tags=72%, list=33%, signal=49%	50628/8890/29107/8480/10419/8664/1973/23165/10209/81929/1975/79833/57187/22985/51808/9984/5901/22794/8087/79897/10289/10799/10284/8662/8666/8661/25929/129401/57510/2521/9775/23636/65110/7329/5976/10557/8893/4927
GO:0006397	mRNA processing	98	137	0.715328	0.380419	2.98823	0.00460829	0.0153877	1030	tags=72%, list=40%, signal=45%	50628/10656/1479/26993/10419/64783/6651/6294/23524/10992/4670/8106/9667/1859/5430/1665/3187/708/10569/3189/10081/23144/6627/51585/79833/902/57187/255967/10713/22985/5433/22827/8570/9128/9984/60493/56949/22794/25949/8458/5936/23451/79042/79811/6732/81608/23248/79005/8161/3191/201626/5725/23076/10949/10084/10284/9584/55596/91746/5511/55696/55677/9410/25929/2521/9775/55147/22938/84271/55660/29101/23…
GO:0043043	peptide biosynthetic process	122	171	0.71345	0.382704	3.17195	0.00531915	0.0165389	1018	tags=71%, list=39%, signal=46%	6159/6229/6183/6128/8890/10884/6173/7965/25983/7555/60488/56919/8664/5036/51116/23367/1973/54460/9521/10987/79590/54148/26589/9698/23369/23185/54517/10209/708/84541/2309/10240/9221/4528/1975/23645/4691/26284/84881/10131/2107/54938/51187/8872/4780/64983/28973/5433/8570/6059/22794/219927/64960/468/51441/65080/5936/8087/7284/51069/10289/113251/51023/23173/6122/57129/6147/84311/54534/64963/23/51386/8…
GO:0006259	DNA metabolic process	134	188	0.712766	0.250749	2.1385	0.00555556	0.0169942	1255	tags=71%, list=49%, signal=40%	4609/2247/5514/56647/7014/4830/1736/2070/10419/83743/5609/23411/56915/9960/604/253461/10155/121642/2033/23049/3725/10987/23560/2956/5430/54512/9887/6418/10576/5245/8493/55651/6018/908/10574/902/25942/83940/51010/5433/5515/54984/9984/5901/56949/116447/54815/1026/54726/57418/84126/23529/1774/23244/6950/3329/6416/9093/7508/26057/4913/57599/54433/10694/10973/2521/55611/22948/5886/25836/57820/51588/11…
GO:0000375	RNA splicing, via transesterification reactions	66	93	0.709677	0.387722	2.72751	0.0035461	0.0137074	1007	tags=71%, list=39%, signal=45%	50628/10656/1479/10419/64783/6651/23524/10992/4670/8106/1859/5430/1665/3187/708/10569/3189/10081/6627/51585/79833/10713/5433/22827/8570/9128/56949/22794/25949/5936/23451/6732/81608/79005/8161/3191/5725/10949/10084/10284/55596/91746/55696/9410/25929/2521/9775/22938/55660/23398/54957/10914/5431/4904/84844/3185/143884/10450/3178/24144/9733/3184/65109/10946/10291/5439
GO:0000377	RNA splicing, via transesterification reactions with bulged adenosine as nucleophile	65	92	0.706522	0.38474	2.70321	0.00358423	0.0137074	1007	tags=71%, list=39%, signal=45%	50628/10656/1479/10419/64783/6651/23524/10992/4670/8106/1859/5430/1665/3187/708/10569/3189/10081/6627/51585/79833/10713/5433/22827/9128/56949/22794/25949/5936/23451/6732/81608/79005/8161/3191/5725/10949/10084/10284/55596/91746/55696/9410/25929/2521/9775/22938/55660/23398/54957/10914/5431/4904/84844/3185/143884/10450/3178/24144/9733/3184/65109/10946/10291/5439
GO:0000398	mRNA splicing, via spliceosome	65	92	0.706522	0.38474	2.70321	0.00358423	0.0137074	1007	tags=71%, list=39%, signal=45%	50628/10656/1479/10419/64783/6651/23524/10992/4670/8106/1859/5430/1665/3187/708/10569/3189/10081/6627/51585/79833/10713/5433/22827/9128/56949/22794/25949/5936/23451/6732/81608/79005/8161/3191/5725/10949/10084/10284/55596/91746/55696/9410/25929/2521/9775/22938/55660/23398/54957/10914/5431/4904/84844/3185/143884/10450/3178/24144/9733/3184/65109/10946/10291/5439
GO:0034660	ncRNA metabolic process	110	156	0.705128	0.491645	4.02718	0.00485437	0.0157973	857	tags=71%, list=33%, signal=50%	4839/9188/50628/6229/54663/54881/1736/7965/705/25983/84154/285855/26156/153443/23160/1662/23212/25926/64216/5036/23411/56915/55621/55646/9521/23560/112858/9328/84128/10528/5430/8812/54517/54512/55272/27079/51106/54802/55759/7702/9221/55651/80135/4691/84881/57647/55695/54938/54888/51010/5433/92856/51808/8570/5901/23378/10360/127253/54606/65080/57508/51728/80324/55250/79897/79042/51018/57418/57050/…
GO:0016072	rRNA metabolic process	61	87	0.701149	0.542165	3.77914	0.00352113	0.0137074	742	tags=70%, list=29%, signal=52%	4839/9188/50628/6229/54663/54881/1736/705/25983/84154/285855/26156/153443/23160/1662/23212/25926/64216/5036/23411/56915/55646/23560/9328/84128/10528/54512/55272/27079/51106/55759/9221/55651/80135/4691/57647/55695/51010/92856/23378/10360/54606/51018/57418/57050/10799/23076/28987/54433/64963/2091/51096/81887/79707/55813/9775/64425/10171/55661/51602/6218
GO:0006974	cellular response to DNA damage stimulus	114	163	0.699387	0.2762	2.27573	0.00518135	0.0162419	1220	tags=70%, list=47%, signal=39%	4609/5514/56647/8870/7014/2308/2070/64782/60488/51322/23411/9960/604/1649/253461/10155/121642/2033/9521/23049/10987/2956/1859/5430/8812/2309/8493/23645/902/26574/5433/9984/56949/8738/25949/1026/84126/4850/79791/23244/10210/7508/23612/28992/4913/57599/64963/8445/5295/5929/10973/2521/55611/4170/3276/5886/25896/25836/51588/11198/25/4287/2547/22938/91801/1106/5976/493861/5431/9923/51720/1647/51366/95…
GO:0006364	rRNA processing	58	83	0.698795	0.540349	3.70974	0.00348432	0.0137074	742	tags=70%, list=29%, signal=51%	4839/9188/50628/6229/54663/54881/1736/705/25983/84154/285855/26156/153443/23160/1662/23212/25926/64216/5036/23411/56915/55646/23560/84128/10528/54512/55272/27079/51106/55759/9221/55651/80135/57647/55695/51010/92856/23378/10360/54606/51018/57418/57050/10799/23076/28987/54433/64963/2091/51096/81887/79707/55813/9775/10171/55661/51602/6218
GO:1902679	negative regulation of RNA biosynthetic process	155	222	0.698198	0.196472	1.72473	0.00595238	0.0169942	1268	tags=70%, list=49%, signal=39%	4609/650/55122/10370/6664/2308/4929/10419/1906/5977/467/2296/7555/10009/10468/5036/23411/9960/1051/604/1649/8325/253461/10155/4783/2033/55646/3725/3516/57459/708/23429/23314/6418/8289/2309/57215/5245/8493/196/23013/8427/5771/7572/3084/2908/3096/25942/8805/3720/155061/6299/7050/23378/6926/639/54815/4335/155054/9241/2114/30812/10943/10284/654/9093/6720/55922/4665/23741/51773/51592/163126/11244/2583…
GO:1903507	negative regulation of nucleic acid-templated transcription	155	222	0.698198	0.196472	1.72473	0.00595238	0.0169942	1268	tags=70%, list=49%, signal=39%	4609/650/55122/10370/6664/2308/4929/10419/1906/5977/467/2296/7555/10009/10468/5036/23411/9960/1051/604/1649/8325/253461/10155/4783/2033/55646/3725/3516/57459/708/23429/23314/6418/8289/2309/57215/5245/8493/196/23013/8427/5771/7572/3084/2908/3096/25942/8805/3720/155061/6299/7050/23378/6926/639/54815/4335/155054/9241/2114/30812/10943/10284/654/9093/6720/55922/4665/23741/51773/51592/163126/11244/2583…
GO:0010608	posttranscriptional regulation of gene expression	108	155	0.696774	0.248756	2.03439	0.00487805	0.0158073	1213	tags=70%, list=47%, signal=39%	1736/8890/8480/25983/26135/55802/7555/4670/8664/5036/56915/23367/23165/9698/5430/23369/23185/54517/54512/10209/708/84541/81929/6418/2309/9221/4528/5695/1975/23645/4691/84881/10131/2107/8872/51010/5433/90806/8570/5901/22794/468/51441/65080/5936/8087/5706/10289/113251/23173/201626/10949/5718/9782/91746/144233/5511/8662/25929/129401/57510/5694/9775/23636/65110/55147/84271/5704/3609/5976/170506/5431/…
GO:0032259	methylation	44	64	0.6875	0.348255	2.22449	0.00322581	0.0137074	969	tags=69%, list=37%, signal=44%	4609/4839/694/10419/64783/64216/23411/55621/10155/51106/84274/8493/51742/6018/10400/2107/55695/54888/3720/10196/23378/127253/639/54815/29081/144233/9718/2091/55677/5929/3276/4144/22938/91801/80745/2935/51805/9836/54880/80335/56980/29072/84444/10664
GO:0034470	ncRNA processing	85	124	0.685484	0.482142	3.71936	0.00425532	0.0147977	840	tags=69%, list=32%, signal=49%	4839/9188/50628/6229/54663/54881/1736/705/25983/84154/285855/26156/153443/23160/1662/23212/25926/64216/5036/23411/56915/55621/55646/23560/112858/84128/10528/54517/54512/55272/27079/51106/54802/55759/9221/55651/80135/84881/57647/55695/54888/51010/92856/23378/10360/127253/54606/65080/57508/51728/80324/55250/79897/79042/51018/57418/57050/10799/23076/28987/56931/144233/54433/64963/2091/51096/81887/79…
GO:0006366	transcription by RNA polymerase II	331	486	0.68107	0.23381	2.27285	0.0105263	0.0255022	1281	tags=68%, list=50%, signal=42%	3638/4609/23175/2247/4839/650/9188/55122/10370/10153/7014/23082/10135/6664/2308/55859/1479/26993/4929/1959/1906/55252/5977/64783/6294/467/2296/7555/1105/10009/9586/8106/10468/7570/23411/9960/1051/604/1649/8325/253461/51545/10155/2648/4783/2033/55646/90874/3725/10987/9935/170960/5324/7337/9667/5430/8812/3516/57459/708/23429/171017/3142/283078/23314/8289/2309/57215/23144/7702/5245/8493/5695/51585/7…
GO:0043604	amide biosynthetic process	130	191	0.680628	0.364847	3.089	0.00578035	0.0169942	1018	tags=68%, list=39%, signal=45%	6319/2194/2181/6159/6229/6183/6128/8890/10884/6173/7965/25983/7555/5166/60488/56919/8664/5036/31/51116/23367/1973/54460/9521/10987/79590/54148/26589/9698/23369/23185/54517/10209/708/84541/2309/10240/9221/4528/1975/23645/4691/26284/84881/10400/10131/2107/54938/51187/8872/4780/64983/28973/5433/8570/6059/22794/219927/64960/468/51441/65080/5936/8087/7284/51069/10289/113251/51023/23173/6122/57129/6147…
GO:0044270	cellular nitrogen compound catabolic process	95	141	0.673759	0.22928	1.81319	0.0046729	0.0154025	1196	tags=67%, list=46%, signal=38%	6159/6229/8942/1736/6128/6173/8480/5144/26135/55802/4670/56915/23367/55629/23049/23165/9698/7167/23369/5520/54512/9887/81929/6418/5695/57026/2107/255967/51010/5433/90806/5515/8570/22794/51441/8087/5706/4850/1774/6122/201626/10949/5718/6147/4913/5511/129401/5694/9775/23636/65110/55147/6218/5142/5704/5976/6231/170506/4904/6132/6138/2935/4927/6193/3163/26019/6832/29883/79675/51154/5393/6093/3184/651…
GO:0034655	nucleobase-containing compound catabolic process	92	137	0.671533	0.223086	1.75236	0.00460829	0.0153877	1196	tags=67%, list=46%, signal=38%	6159/6229/1736/6128/6173/8480/5144/26135/55802/4670/56915/23367/55629/23049/23165/9698/7167/23369/5520/54512/9887/81929/6418/5695/2107/255967/51010/5433/90806/5515/8570/22794/51441/8087/5706/4850/1774/6122/201626/10949/5718/6147/4913/5511/129401/5694/9775/23636/65110/55147/6218/5142/5704/5976/6231/170506/4904/6132/6138/2935/4927/6193/26019/6832/29883/79675/51154/5393/6093/3184/65109/581/3297/5689…
GO:0000122	negative regulation of transcription by RNA polymerase II	99	148	0.668919	0.27167	2.19094	0.00471698	0.0154155	1126	tags=67%, list=44%, signal=40%	4609/650/55122/10370/6664/2308/4929/1906/5977/467/2296/7555/10468/23411/9960/1051/604/1649/8325/10155/4783/2033/55646/3725/3516/57459/708/23429/23314/8289/2309/57215/5245/23013/5771/2908/3096/25942/3720/155061/6299/7050/6926/639/54815/4335/9241/2114/654/9093/6720/23741/51592/163126/11244/25836/10127/51588/7329/1602/22938/23286/169792/9678/3054/6662/6879/9839/4774/5494/8545/84759/8878/4799/54880/2…
GO:0046700	heterocycle catabolic process	96	144	0.666667	0.224762	1.80046	0.00471698	0.0154155	1196	tags=67%, list=46%, signal=38%	6159/6229/8942/1736/6128/6173/8480/5144/26135/55802/4670/56915/23367/55629/23049/23165/9698/7167/23369/5520/54512/9887/81929/6418/5695/57026/2107/255967/51010/4780/5433/90806/5515/8570/22794/51441/8087/5706/4850/1774/6122/201626/10949/5718/6147/4913/5511/129401/5694/9775/23636/65110/55147/6218/5142/5704/5976/6231/170506/4904/6132/6138/2935/4927/6193/3163/26019/6832/29883/79675/51154/5393/6093/318…
GO:0019439	aromatic compound catabolic process	96	145	0.662069	0.216407	1.74482	0.00465116	0.015397	1196	tags=66%, list=46%, signal=38%	6159/6229/8942/1736/6128/6173/8480/5144/26135/55802/4670/56915/23367/55629/23049/23165/9698/7167/23369/5520/54512/9887/81929/6418/5695/57026/2107/255967/51010/5433/90806/5515/8570/22794/51441/8087/5706/4850/1774/6122/201626/10949/5718/6147/4913/5511/129401/5694/9775/23636/65110/55147/6218/5142/5704/4128/5976/6231/170506/4904/6132/6138/2935/4927/6193/3163/26019/6832/29883/79675/51154/5393/6093/318…
GO:0019080	viral gene expression	35	53	0.660377	0.413645	2.50307	0.00307692	0.0137074	878	tags=66%, list=34%, signal=45%	6159/6229/6128/6173/8480/1105/8664/2033/3725/23165/5430/81929/5433/6122/5725/23076/6147/51386/8662/8666/9150/51773/8661/129401/23636/6667/22938/6218/6231/5431/6132/6138/4927/6193/81559
GO:0043414	macromolecule methylation	35	53	0.660377	0.33324	2.01652	0.00307692	0.0137074	969	tags=66%, list=37%, signal=42%	4609/4839/694/10419/64783/64216/23411/55621/10155/51106/8493/51742/6018/2107/55695/54888/3720/10196/127253/54815/144233/2091/55677/5929/3276/22938/91801/80745/2935/9836/54880/80335/29072/84444/10664
GO:1901361	organic cyclic compound catabolic process	99	150	0.66	0.219716	1.78796	0.00930233	0.0234236	1196	tags=66%, list=46%, signal=38%	6159/6229/8942/1736/6128/6173/8480/5144/26135/55802/4670/56915/23367/55629/23049/23165/9698/7167/23369/5520/54512/9887/81929/6418/5695/57026/2107/255967/51010/4780/5433/90806/5515/8570/22794/51441/8087/5706/4850/1774/6122/201626/10949/5718/6147/4913/5511/129401/5694/9775/23636/65110/55147/6218/5142/5704/4128/5976/6231/170506/4904/6132/6138/2935/4927/6193/3163/26019/6832/29883/79675/51154/5393/609…
GO:0032984	protein-containing complex disassembly	60	91	0.659341	0.30385	2.13036	0.00362319	0.0137074	1022	tags=66%, list=40%, signal=41%	4609/6183/10884/83743/60488/51116/54460/79590/54148/26589/6418/8289/10240/4528/26284/57026/2107/64983/28973/6059/219927/64960/65080/51069/6599/51023/89795/79142/57129/84311/157922/23401/54534/64963/64969/65005/11198/196528/51073/29074/116541/51318/28977/55168/5976/51253/2935/55173/56648/29979/29093/24144/56893/3480/64979/64949/11222/56945/51258/3796
GO:0006402	mRNA catabolic process	58	88	0.659091	0.339592	2.36424	0.00352113	0.0137074	979	tags=66%, list=38%, signal=42%	6159/6229/6128/6173/26135/55802/4670/56915/23367/55629/23049/9698/23369/5520/54512/9887/6418/5695/2107/255967/51010/5433/90806/5515/8570/22794/51441/8087/5706/4850/6122/201626/10949/5718/6147/5694/9775/65110/55147/6218/5704/5976/6231/170506/4904/6132/6138/2935/6193/26019/6832/29883/79675/51154/5393/6093/3184/65109
GO:0016071	mRNA metabolic process	142	218	0.651376	0.381106	3.32351	0.00598802	0.0170326	941	tags=65%, list=36%, signal=45%	6159/50628/6229/10656/1736/6128/1479/26993/6173/10419/64783/26135/6651/6294/23524/55802/10992/4670/8106/56915/1649/23367/55629/23049/9698/9667/1859/5430/23369/5520/54517/1665/3187/54512/9887/708/10569/3189/6418/10081/23144/5695/6627/51585/79833/902/57187/2107/255967/10713/51010/22985/5433/22827/90806/5515/8570/9128/9984/60493/56949/22794/468/25949/8458/51441/5936/80324/23451/8087/79042/5706/79811…
GO:0042254	ribosome biogenesis	74	115	0.643478	0.512839	3.91168	0.00389105	0.0142301	702	tags=64%, list=27%, signal=49%	4839/9188/50628/6229/54663/10153/54881/1736/6128/705/25983/51491/84154/285855/26156/153443/23160/1662/23212/22907/25926/55299/64216/5036/23411/56915/51116/55646/23560/84128/10528/84946/54512/55272/27079/708/51106/55759/9221/55651/80135/26284/55003/57647/55695/26574/51187/51010/92856/5901/23378/6059/10360/54606/51018/57418/57050/10799/6122/23076/28987/6147/54700/54433/64963/2091/51096/81887/90441/…
GO:0045934	negative regulation of nucleobase-containing compound metabolic process	172	269	0.639405	0.206544	1.90055	0.00671141	0.0184744	1164	tags=64%, list=45%, signal=39%	4609/650/55122/10370/7014/1736/6664/2308/4929/10419/1906/5977/467/2296/7555/10009/10468/5036/23411/9960/1051/604/1649/23367/8325/253461/10155/4783/2033/55646/3725/23560/2956/1859/3516/57459/708/23429/23314/6418/8289/2309/57215/5245/8493/196/23013/8427/5771/7572/3084/2908/3096/25942/8805/3720/155061/90806/54984/6299/9984/7050/23378/6926/6059/55022/639/54815/4335/155054/9241/2114/23244/201626/5725/…
GO:0008380	RNA splicing	76	119	0.638655	0.392564	3.02739	0.00393701	0.01433	853	tags=64%, list=33%, signal=45%	50628/10656/1479/26993/10419/64783/6651/23524/10992/4670/8106/1859/5430/1665/3187/708/10569/3189/10081/6627/51585/79833/57187/10713/22985/5433/22827/6100/5515/8570/9128/9984/56949/22794/25949/8458/5936/23451/79042/6732/81608/1195/79005/8161/3191/5725/23076/10949/10084/10284/9584/55596/91746/5511/55696/5295/55677/9410/25929/2521/9775/22938/1198/55660/23398/54957/57396/10914/6231/5431/4904/84844/55…
GO:0006518	peptide metabolic process	126	198	0.636364	0.297162	2.53608	0.00574713	0.0169942	1018	tags=64%, list=39%, signal=42%	6159/6229/6183/6128/8890/10884/6173/7965/25983/7555/60488/56919/8664/5036/51116/23367/1973/54460/9521/10987/79590/54148/26589/9698/1859/23369/23185/54517/10209/708/84541/2309/10240/9221/4528/1975/23645/4691/26284/84881/10131/2107/54938/51187/8872/4780/64983/28973/5433/8570/6059/9619/22794/219927/64960/468/51441/65080/5936/8087/7284/51069/10289/113251/51023/23173/6122/57129/6147/84311/54534/64963/…
GO:0006401	RNA catabolic process	59	93	0.634409	0.317393	2.23277	0.0035461	0.0137074	958	tags=63%, list=37%, signal=41%	6159/6229/1736/6128/6173/26135/55802/4670/56915/23367/55629/23049/9698/23369/5520/54512/9887/6418/5695/2107/255967/51010/5433/90806/5515/8570/22794/51441/8087/5706/4850/6122/201626/10949/5718/6147/5511/5694/9775/65110/55147/6218/5704/5976/6231/170506/4904/6132/6138/2935/6193/26019/6832/29883/79675/51154/5393/6093/3184
GO:0007015	actin filament organization	47	75	0.626667	-0.395685	-2.29421	0.00141643	0.0102666	854	tags=63%, list=33%, signal=43%	29109/7114/9639/55114/148170/8195/30011/9270/4641/339768/3636/22921/64780/2934/11034/5217/7016/5358/81/9873/9181/23433/10552/6281/7126/10093/2017/4739/201191/6624/3693/10096/10278/55616/6422/5880/9168/961/10092/28988/91663/7169/51466/7184/87/10486/7168
GO:1990778	protein localization to cell periphery	35	56	0.625	-0.361439	-1.95814	0.00298063	0.0137074	907	tags=62%, list=35%, signal=41%	582/10519/483/6616/1605/91461/10484/9270/9528/207/129303/3958/481/25999/975/23433/6281/10490/8766/2037/30846/784/5064/60/10133/10791/122416/91663/3675/22883/54843/857/3688/3911/2621
GO:0030031	cell projection assembly	40	64	0.625	-0.369847	-2.08176	0.00289017	0.0137074	935	tags=62%, list=36%, signal=41%	832/8555/582/25776/54874/27148/148170/8195/22885/7802/5898/3636/1639/9459/10121/2934/79600/5217/53827/23433/25940/1012/8766/203068/7414/2017/10938/6624/5064/115704/10096/5880/55742/28988/51466/4638/857/3688/7846/3911
GO:0120031	plasma membrane bounded cell projection assembly	40	64	0.625	-0.369847	-2.08176	0.00289017	0.0137074	935	tags=62%, list=36%, signal=41%	832/8555/582/25776/54874/27148/148170/8195/22885/7802/5898/3636/1639/9459/10121/2934/79600/5217/53827/23433/25940/1012/8766/203068/7414/2017/10938/6624/5064/115704/10096/5880/55742/28988/51466/4638/857/3688/7846/3911
GO:0051253	negative regulation of RNA metabolic process	150	242	0.619835	0.205397	1.83151	0.00613497	0.0173223	1126	tags=62%, list=44%, signal=39%	4609/650/55122/10370/1736/6664/2308/4929/10419/1906/5977/467/2296/7555/10009/10468/5036/23411/9960/1051/604/1649/23367/8325/253461/10155/4783/2033/55646/3725/1859/3516/57459/708/23429/23314/6418/8289/2309/57215/5245/8493/196/23013/8427/5771/7572/3084/2908/3096/25942/8805/3720/155061/90806/6299/7050/23378/6926/6059/639/54815/4335/155054/9241/2114/5725/10949/30812/10943/10284/654/9093/6720/55922/14…
GO:0030198	extracellular matrix organization	63	102	0.617647	-0.593378	-3.68224	0.00137741	0.0102666	499	tags=62%, list=19%, signal=52%	1305/780/84695/3682/26585/1303/4921/54507/6624/7837/351/3693/2022/84171/5352/3672/3678/9644/83700/1307/1513/22795/5054/1292/1803/961/80781/7057/1634/1293/1291/4015/3912/2201/1294/165/1284/960/3675/871/3688/2/3371/633/3913/23187/1289/3911/7045/83716/1290/4239/5351/5033/2192/10516/1282/8728/8434/1281/2621/1277/1278
GO:0030036	actin cytoskeleton organization	76	124	0.612903	-0.408578	-2.64621	0.00130378	0.0102666	835	tags=61%, list=32%, signal=44%	7114/9639/55114/148170/8195/22885/3996/57669/30011/9270/5898/84168/4641/339768/3636/29/22921/64780/5239/1264/2934/11034/5217/7016/5358/81/9873/3611/9181/23433/10552/6281/5754/7126/10093/2037/4627/30846/2017/4739/201191/301/6624/11188/3693/5066/10096/60/10278/7094/55616/83700/6422/5880/9168/55742/961/1465/71/10092/1266/28988/91663/7169/23022/51466/7184/87/3688/811/10486/1265/7010/7168/9124/5159
hsa04510	Focal adhesion	33	54	0.611111	-0.596107	-3.23244	0.00144928	0.00772947	450	tags=61%, list=17%, signal=52%	7424/7414/595/858/3693/3672/3678/60/7094/5880/55742/10398/1292/7057/71/1293/1291/3912/1284/896/3675/4638/10627/857/87/3688/3371/3913/3911/1282/5159/1277/1278
GO:0007155	cell adhesion	138	230	0.6	-0.479554	-3.44138	0.00119048	0.0102666	697	tags=60%, list=27%, signal=48%	84168/558/79414/207/3636/6352/1462/8745/3958/57555/481/22801/94/975/5239/91179/2934/64332/3280/3315/6494/81/7216/4582/2683/10507/3611/23654/53827/6695/1305/780/6281/5754/84695/1012/3682/64065/59339/284/7414/4627/1303/2017/10979/4921/4739/301/1009/7048/351/3693/3956/8406/2022/3672/8764/4831/3678/8910/60/10278/7094/83700/6422/1307/677/5880/55742/10272/10398/22795/5054/27286/55591/1292/5328/1803/961…
GO:0022610	biological adhesion	138	231	0.597403	-0.477782	-3.43519	0.00118343	0.0102666	697	tags=60%, list=27%, signal=48%	84168/558/79414/207/3636/6352/1462/8745/3958/57555/481/22801/94/975/5239/91179/2934/64332/3280/3315/6494/81/7216/4582/2683/10507/3611/23654/53827/6695/1305/780/6281/5754/84695/1012/3682/64065/59339/284/7414/4627/1303/2017/10979/4921/4739/301/1009/7048/351/3693/3956/8406/2022/3672/8764/4831/3678/8910/60/10278/7094/83700/6422/1307/677/5880/55742/10272/10398/22795/5054/27286/55591/1292/5328/1803/961…
GO:1903311	regulation of mRNA metabolic process	53	89	0.595506	0.283	1.98658	0.00353357	0.0137074	958	tags=60%, list=37%, signal=39%	10656/64783/26135/6651/6294/55802/4670/8106/56915/23367/9698/9667/1859/23369/54512/708/6418/23144/5695/51010/90806/8570/51441/5936/8087/5706/79811/6732/3191/201626/5725/10949/5718/10284/91746/55677/5694/55147/22938/5704/5976/10914/170506/4904/11052/3178/29883/79675/9733/5393/9810/6093/3184
GO:0070647	protein modification by small protein conjugation or removal	124	209	0.593301	0.254485	2.21643	0.00595238	0.0169942	1074	tags=59%, list=42%, signal=38%	4609/57161/8480/7965/1959/55252/55432/51322/23411/9960/55905/10155/2648/2033/10987/23560/23165/7337/55527/29116/84132/23429/84541/81929/5581/25820/10296/5695/10016/23640/553115/8805/10713/51070/10196/4780/84640/54984/7326/64682/84085/5706/122809/54726/4850/51530/26263/79791/10210/140459/5718/79142/91107/25831/57599/11047/26054/63893/7328/9529/55182/7322/84259/10059/51592/80829/129401/55611/5694/5…
GO:0016192	vesicle-mediated transport	206	349	0.590258	-0.372524	-2.83163	0.00110619	0.0102666	708	tags=59%, list=27%, signal=50%	757/10549/2802/5468/9727/10313/7301/22898/54874/3685/9761/8492/6616/7867/51150/7114/55114/5648/9749/823/3303/3996/54732/51699/91461/10484/339122/55198/30011/23265/2159/2717/10945/5898/26286/4641/558/3916/8724/3636/114876/6352/29/3958/7077/317/57555/4043/1639/8560/64400/64780/25999/975/10121/51614/51226/7076/2934/8407/10159/535/57410/11014/5217/8773/81/6892/9873/23258/847/2683/9961/51071/9145/1091…
GO:0032940	secretion by cell	145	246	0.589431	-0.3804	-2.74968	0.00118483	0.0102666	881	tags=59%, list=34%, signal=43%	83786/10549/818/27163/9727/7301/2641/3685/9761/8492/6616/51150/7114/3710/55114/3418/9749/823/3303/3996/7128/1363/23265/2717/5898/26286/558/3916/6352/29/3958/7077/317/57555/285381/8560/64780/7076/2934/8407/10159/535/5217/8773/81/847/2683/9961/51768/51071/9145/10916/25797/23568/10490/9588/537/2720/308/9805/8766/203068/7424/133/284/3920/7414/4627/291/10312/1508/8907/5660/55754/301/2799/2896/8566/111…
GO:0061013	regulation of mRNA catabolic process	30	51	0.588235	0.259801	1.57134	0.021021	0.0444742	958	tags=59%, list=37%, signal=38%	26135/55802/4670/56915/23367/9698/23369/54512/6418/5695/51010/90806/8570/51441/8087/5706/201626/10949/5718/5694/55147/5704/5976/170506/4904/29883/79675/5393/6093/3184
GO:0036230	granulocyte activation	62	106	0.584906	-0.469909	-2.93569	0.00137552	0.0102666	666	tags=58%, list=26%, signal=45%	6352/29/3958/7077/317/8560/2934/10159/535/8773/847/2683/9961/51071/9145/25797/9588/2720/203068/3920/7414/10312/1508/8907/5660/55754/2799/2896/8566/58485/5329/1727/4831/5236/10577/8836/5476/29952/94103/5328/961/1535/10092/967/3074/4126/230/567/1650/28988/8635/5547/960/23385/11010/57153/968/10970/1265/1075/83716/10875
GO:0042119	neutrophil activation	62	106	0.584906	-0.469909	-2.93569	0.00137552	0.0102666	666	tags=58%, list=26%, signal=45%	6352/29/3958/7077/317/8560/2934/10159/535/8773/847/2683/9961/51071/9145/25797/9588/2720/203068/3920/7414/10312/1508/8907/5660/55754/2799/2896/8566/58485/5329/1727/4831/5236/10577/8836/5476/29952/94103/5328/961/1535/10092/967/3074/4126/230/567/1650/28988/8635/5547/960/23385/11010/57153/968/10970/1265/1075/83716/10875
GO:0030029	actin filament-based process	80	137	0.583942	-0.383927	-2.54454	0.00127389	0.0102666	835	tags=58%, list=32%, signal=42%	7114/9639/55114/148170/8195/22885/3996/57669/30011/9270/5898/84168/4641/339768/3636/29/22921/64780/5239/1264/2934/11034/5217/7016/5358/81/9873/4637/3611/9181/23433/10552/6281/5754/7126/10093/2037/4627/30846/2017/4739/201191/301/6624/11188/3693/6444/5066/10096/60/10278/7094/55616/83700/6422/54795/5880/9168/55742/961/1465/71/10092/1266/28988/91663/7169/23022/51466/7184/857/87/3688/811/10486/1265/70…
GO:0043547	positive regulation of GTPase activity	35	60	0.583333	-0.298731	-1.64916	0.020558	0.0437356	944	tags=58%, list=36%, signal=38%	397/2064/4650/85360/9639/55114/57636/3996/10484/6001/23102/26286/6352/29/9459/51306/8853/5997/6494/10507/6281/55803/4739/858/115704/9905/55616/6422/392/54453/30851/3688/6347/1123/7070
GO:0002283	neutrophil activation involved in immune response	61	105	0.580952	-0.470347	-2.93512	0.00137741	0.0102666	659	tags=58%, list=25%, signal=45%	29/3958/7077/317/8560/2934/10159/535/8773/847/2683/9961/51071/9145/25797/9588/2720/203068/3920/7414/10312/1508/8907/5660/55754/2799/2896/8566/58485/5329/1727/4831/5236/10577/8836/5476/29952/94103/5328/961/1535/10092/967/3074/4126/230/567/1650/28988/8635/5547/960/23385/11010/57153/968/10970/1265/1075/83716/10875
GO:0043312	neutrophil degranulation	61	105	0.580952	-0.470347	-2.93512	0.00137741	0.0102666	659	tags=58%, list=25%, signal=45%	29/3958/7077/317/8560/2934/10159/535/8773/847/2683/9961/51071/9145/25797/9588/2720/203068/3920/7414/10312/1508/8907/5660/55754/2799/2896/8566/58485/5329/1727/4831/5236/10577/8836/5476/29952/94103/5328/961/1535/10092/967/3074/4126/230/567/1650/28988/8635/5547/960/23385/11010/57153/968/10970/1265/1075/83716/10875
GO:0010558	negative regulation of macromolecule biosynthetic process	160	276	0.57971	0.194457	1.78426	0.0070922	0.0190448	1083	tags=58%, list=42%, signal=38%	4609/650/55122/10370/23671/7014/6664/2308/4929/10419/1906/5977/467/2296/7555/10009/10468/5036/23411/9960/1051/604/1649/23367/8325/253461/10155/4783/2033/55646/3725/23560/2956/9698/54517/3516/57459/708/23429/23314/6418/8289/2309/57215/5245/8493/4691/196/23013/8427/5771/7572/3084/2908/3096/26574/25942/8805/3720/155061/8570/54984/6299/7050/23378/6926/468/51441/5936/639/8087/54815/4335/155054/9241/21…
GO:0031327	negative regulation of cellular biosynthetic process	164	284	0.577465	0.194425	1.78153	0.0075188	0.0198434	1083	tags=58%, list=42%, signal=38%	3638/4609/650/55122/10370/7014/6664/2308/4929/10419/1906/5977/467/2296/7555/10009/10468/5036/23411/9960/1051/604/1649/23367/8325/253461/10155/4783/2033/55646/3725/23560/2956/9698/54517/3516/57459/708/23429/23314/6418/8289/2309/57215/10296/5245/8493/4691/196/23013/8427/5771/7572/3084/2908/3096/26574/25942/8805/3720/155061/8570/54984/6299/7050/23378/6926/55022/468/51441/5936/639/8087/54815/4335/155…
GO:0007160	cell-matrix adhesion	30	52	0.576923	-0.528116	-2.79647	0.00149925	0.0102666	535	tags=58%, list=21%, signal=47%	3611/1305/780/6281/1012/59339/7414/2017/10979/4921/3693/3672/8910/83700/6422/1307/22795/5054/5328/7057/967/960/3675/87/3688/7010/3911/10516/1281/7070
GO:0002446	neutrophil mediated immunity	61	106	0.575472	-0.467494	-2.9206	0.00137552	0.0102666	659	tags=58%, list=25%, signal=45%	29/3958/7077/317/8560/2934/10159/535/8773/847/2683/9961/51071/9145/25797/9588/2720/203068/3920/7414/10312/1508/8907/5660/55754/2799/2896/8566/58485/5329/1727/4831/5236/10577/8836/5476/29952/94103/5328/961/1535/10092/967/3074/4126/230/567/1650/28988/8635/5547/960/23385/11010/57153/968/10970/1265/1075/83716/10875
GO:0051604	protein maturation	35	61	0.57377	-0.306827	-1.70113	0.017673	0.039115	919	tags=57%, list=36%, signal=38%	90701/147372/9973/10549/8492/26262/9159/1363/9528/91289/60559/831/975/25825/2934/10159/26022/83464/64065/715/4627/79094/7466/5627/5054/5328/7057/165/871/23385/3553/2/811/2152/5327
GO:0045055	regulated exocytosis	86	150	0.573333	-0.474424	-3.19836	0.00127065	0.0102666	659	tags=57%, list=25%, signal=45%	29/3958/7077/317/8560/64780/7076/2934/8407/10159/535/5217/8773/81/847/2683/9961/51071/9145/10916/25797/10490/9588/2720/308/203068/7424/3920/7414/4627/10312/1508/8907/5660/55754/2799/2896/8566/351/58485/334/5329/1727/808/4831/5236/7094/10577/8836/5476/5627/5880/51706/29952/5054/94103/5328/961/928/1535/7057/10092/967/3074/4126/230/567/1650/28988/8635/5547/960/3959/23385/11010/87/57153/968/2/10970/1…
GO:0022411	cellular component disassembly	74	130	0.569231	0.208953	1.6218	0.00877193	0.0224561	1030	tags=57%, list=40%, signal=36%	4609/23175/4314/6183/10884/26993/83743/60488/51116/54460/79590/54148/26589/6418/8289/10240/4528/26284/57026/2107/22985/64983/28973/6059/219927/64960/65080/51069/6599/51023/89795/79065/79142/57129/6720/84311/157922/23401/54534/64963/1459/9927/10059/64969/65005/11198/196528/51073/29074/116541/51318/28977/55168/5976/51253/2935/55173/56648/8878/29979/29093/2011/24144/56893/3480/64979/64949/11222/5694…
GO:0009890	negative regulation of biosynthetic process	166	292	0.568493	0.187977	1.73406	0.0144928	0.0335254	1083	tags=57%, list=42%, signal=37%	3638/4609/650/55122/10370/23671/7014/6664/2308/4929/10419/1906/5977/467/2296/7555/10009/10468/5036/23411/9960/1051/604/1649/23367/8325/253461/10155/4783/2033/55646/3725/23560/2956/9698/54517/3516/57459/708/23429/23314/6418/8289/2309/57215/10296/5245/8493/4691/196/23013/8427/5771/7572/10131/3084/2908/3096/26574/25942/8805/3720/155061/8570/54984/6299/7050/23378/6926/55022/468/51441/5936/639/8087/54…
GO:0009611	response to wounding	70	124	0.564516	-0.463181	-2.99986	0.00130378	0.0102666	624	tags=56%, list=24%, signal=45%	64780/94/975/7076/2934/3315/10544/2683/3611/22846/780/5754/308/133/7414/4627/30846/8323/4131/29071/10938/3065/301/7048/2896/378/79001/3956/5329/26509/7035/3678/60/7094/83700/677/5627/3047/10398/5054/5328/928/1465/7057/71/1634/4015/5547/3048/960/4638/2151/81029/10627/857/50808/2/3371/114897/3913/7168/1289/2152/2192/5159/1281/2621/5327/1277/1278
GO:0043299	leukocyte degranulation	62	110	0.563636	-0.453703	-2.841	0.00134771	0.0102666	659	tags=56%, list=25%, signal=44%	29/3958/7077/317/8560/2934/10159/535/8773/847/2683/9961/51071/9145/25797/9588/2720/203068/3920/7414/10312/1508/8907/5660/55754/2799/2896/8566/58485/5329/1727/4831/5236/10577/8836/5476/5880/29952/94103/5328/961/1535/10092/967/3074/4126/230/567/1650/28988/8635/5547/960/23385/11010/57153/968/10970/1265/1075/83716/10875
GO:0042060	wound healing	61	109	0.559633	-0.460219	-2.8783	0.00135501	0.0102666	624	tags=56%, list=24%, signal=44%	64780/94/975/7076/2934/3315/10544/2683/3611/780/5754/308/7414/4627/30846/8323/29071/10938/3065/301/7048/79001/5329/26509/7035/3678/60/7094/5627/3047/10398/5054/5328/928/1465/7057/71/1634/4015/5547/3048/960/4638/2151/81029/10627/857/50808/2/3371/114897/7168/1289/2152/2192/5159/1281/2621/5327/1277/1278
GO:0002275	myeloid cell activation involved in immune response	62	111	0.558559	-0.447178	-2.80625	0.00135135	0.0102666	659	tags=56%, list=25%, signal=43%	29/3958/7077/317/8560/2934/10159/535/8773/847/2683/9961/51071/9145/25797/9588/2720/203068/3920/7414/10312/1508/8907/5660/55754/2799/2896/8566/58485/5329/1727/4831/5236/10577/8836/5476/5880/29952/94103/5328/961/1535/10092/967/3074/4126/230/567/1650/28988/8635/5547/960/23385/11010/57153/968/10970/1265/1075/83716/10875
GO:0006357	regulation of transcription by RNA polymerase II	246	443	0.555305	0.211725	2.00509	0.0113636	0.0268726	1069	tags=56%, list=41%, signal=39%	3638/4609/23175/2247/4839/650/55122/10370/10153/7014/23082/10135/6664/2308/55859/26993/4929/1959/1906/55252/5977/64783/6294/467/2296/7555/1105/10009/9586/10468/7570/23411/9960/1051/604/1649/8325/253461/51545/10155/2648/4783/2033/55646/90874/3725/10987/9935/170960/5324/7337/9667/8812/3516/57459/708/23429/171017/3142/283078/23314/8289/2309/57215/23144/7702/5245/5695/7675/4691/196/51742/6018/23013/8…
GO:0002444	myeloid leukocyte mediated immunity	63	114	0.552632	-0.439578	-2.79	0.00134409	0.0102666	659	tags=55%, list=25%, signal=43%	29/3958/7077/317/8560/2934/10159/535/8773/847/2683/9961/51071/9145/25797/9588/2720/203068/3920/7414/10312/1508/8907/5660/55754/2799/2896/8566/58485/5329/1727/4831/5236/10577/8836/5476/5880/29952/94103/5328/961/1535/10092/967/3074/10417/4126/230/567/1650/28988/8635/5547/960/23385/11010/57153/968/10970/1265/1075/83716/10875
GO:0006887	exocytosis	92	167	0.550898	-0.444149	-3.04855	0.00123457	0.0102666	666	tags=55%, list=26%, signal=44%	6352/29/3958/7077/317/8560/64780/7076/2934/8407/10159/535/5217/8773/81/847/2683/9961/51071/9145/10916/25797/10490/9588/537/2720/308/9805/8766/203068/7424/3920/7414/4627/10312/1508/8907/5660/55754/301/2799/2896/8566/351/58485/334/5329/1727/808/4831/5236/7094/10577/8836/5476/5627/5880/51706/29952/5054/94103/5328/961/928/1535/7057/10092/967/3074/4126/230/567/1650/28988/8635/5547/960/3959/23385/54843…
GO:0010629	negative regulation of gene expression	207	378	0.547619	0.234199	2.19996	0.0106383	0.025612	979	tags=55%, list=38%, signal=40%	3949/4609/650/6159/55122/10370/6229/7014/4830/6664/6128/2308/4929/25976/6173/8480/1906/5977/26135/467/55802/2296/7555/79893/4670/10009/10468/5036/23411/56915/9960/1051/604/1649/23367/8325/253461/10155/4783/2033/55629/55646/23049/3725/5324/23165/9698/1859/5430/23369/1399/5520/54517/3516/54512/9887/57459/708/23429/7850/23314/81929/6418/8289/2309/57215/5245/8493/5695/4691/196/94241/23013/8427/5771/7…
GO:0042110	T cell activation	36	66	0.545455	-0.398157	-2.2629	0.00143678	0.0102666	708	tags=55%, list=27%, signal=41%	10945/207/6352/3958/975/2934/64332/3280/26022/84695/4627/10312/301/7048/3956/8764/677/5880/1803/961/652/567/1650/2615/960/896/23385/8654/857/3553/57045/3575/7292/6347/10875/7070
GO:0002274	myeloid leukocyte activation	67	123	0.544715	-0.405653	-2.62351	0.00130548	0.0102666	666	tags=54%, list=26%, signal=42%	6352/29/3958/7077/317/8560/2934/10159/535/8773/847/2683/9961/51071/9145/25797/9588/2720/203068/3920/7414/10312/1508/8907/5660/55754/7048/2799/2896/8566/351/58485/5329/1727/4831/5236/10577/8836/5476/5880/29952/94103/5328/961/1535/7057/10092/967/3074/4126/230/567/1650/28988/4495/8635/5547/960/23385/11010/57153/968/10970/1265/1075/83716/10875
GO:0031589	cell-substrate adhesion	43	79	0.544304	-0.518529	-3.06278	0.00138504	0.0102666	504	tags=54%, list=19%, signal=45%	6695/1305/780/6281/1012/59339/284/7414/2017/10979/4921/4739/3693/3956/3672/3678/8910/83700/6422/1307/5880/55742/22795/5054/5328/7057/967/3912/91663/960/3675/87/3688/811/3913/7010/3911/2192/10516/1281/7070/2621/1277
GO:0043062	extracellular structure organization	58	107	0.542056	-0.580426	-3.6441	0.00136054	0.0102666	371	tags=54%, list=14%, signal=48%	54507/6624/7837/351/3693/2022/5360/84171/5352/3672/3678/9644/83700/1307/1513/5034/22795/5054/1292/1803/961/80781/7057/1634/1293/1291/4015/3912/2201/1294/165/1284/960/3675/871/3688/2/3371/633/3913/23187/1289/3911/7045/83716/1290/4239/5351/5033/2192/10516/1282/8728/8434/1281/2621/1277/1278
GO:0045892	negative regulation of transcription, DNA-templated	114	211	0.540284	0.200366	1.73851	0.00595238	0.0169942	974	tags=54%, list=38%, signal=37%	4609/650/55122/10370/6664/2308/4929/1906/5977/467/2296/7555/10009/10468/5036/23411/9960/1051/604/1649/8325/253461/10155/4783/2033/55646/3725/3516/57459/708/23429/23314/6418/8289/2309/57215/5245/8493/196/23013/8427/5771/7572/3084/2908/3096/25942/8805/3720/155061/6299/7050/23378/6926/639/54815/4335/155054/9241/2114/30812/10943/654/9093/6720/55922/4665/23741/51773/51592/163126/11244/25836/10127/5158…
GO:0098609	cell-cell adhesion	67	126	0.531746	-0.445618	-2.89331	0.00130208	0.0102666	612	tags=53%, list=24%, signal=43%	975/91179/64332/3280/3315/7216/10507/3611/23654/53827/1305/84695/1012/64065/7414/4627/301/1009/7048/3693/3956/8764/3678/60/7094/83700/677/5880/55742/10272/10398/27286/55591/1803/961/928/1465/71/652/54510/1266/83692/3912/2615/91663/23022/960/4267/22883/8654/10627/857/3688/3553/57045/3575/114897/1004/3911/9124/7292/6347/8728/10875/7070/9076/2621
GO:2000113	negative regulation of cellular macromolecule biosynthetic process	139	262	0.530534	0.19692	1.79577	0.00653595	0.018187	974	tags=53%, list=38%, signal=37%	4609/650/55122/10370/7014/6664/2308/4929/1906/5977/467/2296/7555/10009/10468/5036/23411/9960/1051/604/1649/23367/8325/253461/10155/4783/2033/55646/3725/23560/2956/9698/54517/3516/57459/708/23429/23314/6418/8289/2309/57215/5245/8493/4691/196/23013/8427/5771/7572/3084/2908/3096/26574/25942/8805/3720/155061/8570/54984/6299/7050/23378/6926/468/51441/5936/639/8087/54815/4335/155054/9241/2114/23244/308…
GO:0002263	cell activation involved in immune response	70	132	0.530303	-0.415647	-2.72931	0.0012837	0.0102666	659	tags=53%, list=25%, signal=42%	29/3958/7077/317/8560/975/2934/10159/64332/535/8773/847/2683/9961/51071/26022/9145/25797/84695/9588/2720/203068/3920/7414/10312/1508/8907/5660/55754/301/2799/2896/8566/351/3956/58485/5329/1727/4831/5236/10577/8836/5476/5880/29952/94103/5328/961/1535/10092/967/3074/4126/230/567/1650/28988/8635/5547/960/23385/11010/57153/968/10970/1265/1075/83716/7292/10875
GO:0006897	endocytosis	62	117	0.529915	-0.375746	-2.39334	0.00132802	0.0102666	696	tags=53%, list=27%, signal=41%	4641/558/8724/3636/29/3958/57555/4043/25999/975/2934/81/9873/23433/10552/84695/1012/26585/10093/133/3190/284/4627/30846/2017/10938/858/301/7048/351/8406/88455/84171/4037/808/10096/60/5054/54453/961/928/1535/7057/71/10092/967/84286/10417/26020/567/28988/6272/7184/3959/857/3688/3553/811/4240/6347/7052/2621
GO:0007565	female pregnancy	28	53	0.528302	-0.345348	-1.85023	0.00590842	0.0169942	689	tags=53%, list=27%, signal=40%	5678/207/5672/23641/7076/5997/7216/3488/10916/780/5671/133/5673/1508/7048/5066/3678/1307/6513/231/2354/3675/3553/811/2192/8434/2353/3490
GO:0050673	epithelial cell proliferation	38	72	0.527778	-0.284172	-1.64682	0.0200286	0.0429664	783	tags=53%, list=30%, signal=38%	7128/57142/23213/599/9270/5654/207/6352/94/8742/3280/5176/2683/22846/3488/26277/1012/7424/595/858/2896/4831/6422/677/1535/7057/652/567/3912/51092/26471/9500/23385/857/7010/1893/2152/6347
GO:0009306	protein secretion	38	72	0.527778	-0.301284	-1.74599	0.0143062	0.0331937	881	tags=53%, list=34%, signal=36%	83786/818/9727/2641/3685/6616/7114/3710/3418/7128/26286/6352/57555/285381/51768/23568/308/7424/284/291/10312/301/5066/8764/6422/54795/64285/1803/6513/2615/51092/114902/9636/3553/57333/7292/4053/2621
GO:0002366	leukocyte activation involved in immune response	69	131	0.526718	-0.412451	-2.71299	0.00127877	0.0102666	659	tags=53%, list=25%, signal=41%	29/3958/7077/317/8560/975/2934/10159/64332/535/8773/847/2683/9961/51071/26022/9145/25797/84695/9588/2720/203068/3920/7414/10312/1508/8907/5660/55754/301/2799/2896/8566/3956/58485/5329/1727/4831/5236/10577/8836/5476/5880/29952/94103/5328/961/1535/10092/967/3074/4126/230/567/1650/28988/8635/5547/960/23385/11010/57153/968/10970/1265/1075/83716/7292/10875
GO:0090130	tissue migration	35	67	0.522388	-0.296975	-1.69283	0.0186246	0.0405205	773	tags=52%, list=30%, signal=38%	57142/57669/5025/9270/3964/207/94/8742/3315/5217/5176/22846/1012/26585/8766/7424/284/4627/301/7048/2896/152007/27286/1803/7057/1634/652/59/5547/51466/3675/3688/811/7010/72
GO:0007596	blood coagulation	37	71	0.521127	-0.515953	-2.97715	0.00143266	0.0102666	463	tags=52%, list=18%, signal=44%	308/7414/4627/30846/8323/29071/10938/3065/79001/5329/7035/60/7094/5627/3047/10398/5054/5328/928/1465/7057/71/5547/3048/2151/10627/857/50808/2/114897/2152/2192/1281/2621/5327/1277/1278
GO:0050817	coagulation	37	71	0.521127	-0.515953	-2.97715	0.00143266	0.0102666	463	tags=52%, list=18%, signal=44%	308/7414/4627/30846/8323/29071/10938/3065/79001/5329/7035/60/7094/5627/3047/10398/5054/5328/928/1465/7057/71/5547/3048/2151/10627/857/50808/2/114897/2152/2192/1281/2621/5327/1277/1278
GO:0043603	cellular amide metabolic process	121	233	0.519313	0.271167	2.37331	0.00625	0.0174545	868	tags=52%, list=34%, signal=38%	6319/2194/2181/6159/6229/8942/6183/6128/8890/10884/3157/6173/7965/25983/7555/5166/60488/56919/8664/5036/31/51116/23367/1973/54460/9521/10987/79590/54148/26589/9698/1859/23369/23185/54517/10209/708/84541/2309/10240/9221/4528/1975/23645/4691/26284/84881/10400/10131/2107/54938/51187/8872/4780/64983/28973/5433/5515/8570/6059/9619/22794/219927/64960/468/51441/65080/5936/8087/7284/51069/10289/113251/51…
GO:0034765	regulation of ion transmembrane transport	27	52	0.519231	-0.304365	-1.61167	0.023988	0.0497913	835	tags=52%, list=32%, signal=36%	7114/7402/823/10550/2539/79026/207/57555/481/10063/5997/81/53827/6335/219931/3306/10312/784/351/808/25932/1535/7057/967/857/6347/7070
GO:0001667	ameboidal-type cell migration	41	79	0.518987	-0.278449	-1.6447	0.0193906	0.0418314	773	tags=52%, list=30%, signal=38%	57142/57669/55198/7869/5025/9270/3964/207/94/7076/8742/3315/5217/5176/10507/3611/22846/1012/26585/8766/7424/284/4627/4921/114757/301/7048/2896/152007/27286/1803/7057/1634/652/5547/51466/3675/3688/811/7010/3911
GO:0007162	negative regulation of cell adhesion	29	56	0.517857	-0.429907	-2.32908	0.00149031	0.0102666	570	tags=52%, list=22%, signal=41%	6494/81/4582/10507/23654/53827/6695/84695/1012/284/301/3956/8764/5054/928/7057/652/55558/2615/91663/8654/57045/3371/114897/7045/2192/7292/10875/1277
GO:0044706	multi-multicellular organism process	30	58	0.517241	-0.333128	-1.82417	0.00736377	0.0197051	689	tags=52%, list=27%, signal=39%	5678/207/5672/23641/7076/5997/7216/2683/3488/10916/780/5671/133/5673/1508/7048/5066/3678/1307/6513/3074/231/2354/3675/3553/811/2192/8434/2353/3490
GO:0007010	cytoskeleton organization	113	219	0.515982	-0.309004	-2.19959	0.00120048	0.0102666	858	tags=52%, list=33%, signal=38%	85360/29109/22983/126374/7114/9639/55114/84790/148170/8195/3303/22885/1605/3996/7128/7802/57669/30011/2009/9270/5898/84168/4641/339768/3636/29/6840/8045/22921/1639/64780/25999/10121/5239/1264/2934/6867/11034/5217/7016/6494/5358/81/9873/3611/9181/23433/10552/6281/5754/7126/10093/8766/203068/2037/4627/30846/2017/4131/4739/201191/301/6624/5064/11188/3693/5066/9204/10096/60/25932/10278/7094/55616/837…
GO:0007599	hemostasis	37	72	0.513889	-0.512027	-2.96728	0.00143062	0.0102666	463	tags=51%, list=18%, signal=43%	308/7414/4627/30846/8323/29071/10938/3065/79001/5329/7035/60/7094/5627/3047/10398/5054/5328/928/1465/7057/71/5547/3048/2151/10627/857/50808/2/114897/2152/2192/1281/2621/5327/1277/1278
GO:0000904	cell morphogenesis involved in differentiation	58	113	0.513274	-0.308444	-1.94752	0.00134409	0.0102666	796	tags=51%, list=31%, signal=37%	4692/1605/3996/10494/57142/57669/8985/9638/30011/7869/9270/84168/558/79600/3280/81/10507/3611/23654/6281/8766/7414/4627/1303/2017/4131/29071/10979/4739/1009/351/66008/6277/60/5880/55742/1292/80781/1293/55558/1291/3912/28988/91663/1294/51393/23022/51466/87/3688/4130/811/3913/7010/3911/2192/1123/7070
GO:0043269	regulation of ion transport	39	76	0.513158	-0.286517	-1.66414	0.0156472	0.0355535	879	tags=51%, list=34%, signal=35%	483/818/2641/7114/7402/823/10550/2539/79026/5025/207/6352/3958/57555/481/10063/5997/81/53827/6335/219931/3306/10312/784/351/808/7466/25932/1535/7057/967/567/51393/4638/857/3553/6347/5159/7070
GO:0034220A141:O168A141:O172A141:O176A2A141:O164A141:O180A141:O184A2A141:O164A141:O188A2A141:O164A141:O193A2A141:O164A141:O198A2A141:O164A141:O203A2A141:O164A141:O208A2A141:O164A141:O213A2A141:O164A141:O218A2A141:O164A141:O223A2A141:OA141:Y321	ion transmembrane transport	72	141	0.510638	-0.246301	-1.64557	0.0164975	0.0370665	900	tags=51%, list=35%, signal=35%	4891/23155/9213/483/3685/6616/7114/8992/3710/23530/1345/7402/823/80727/284129/124565/10550/2539/475/55129/79026/2542/5025/6687/207/11182/3927/4697/57555/347734/481/113655/56996/145389/10063/535/5997/81/29927/55002/53827/6335/537/308/284439/523/219931/3306/9123/10312/6575/784/351/23443/6277/808/25932/54795/7991/1528/1535/7057/967/84286/155066/51393/121601/857/1346/6347/7070/2621
GO:0006812	cation transport	72	142	0.507042	-0.251173	-1.68044	0.0114068	0.0268726	900	tags=51%, list=35%, signal=35%	4891/9973/483/818/2641/3685/6616/7114/8992/3710/23530/1345/7402/823/124565/2539/475/55129/79026/5025/6687/207/11182/6352/3958/4697/57555/481/113655/56996/145389/10063/535/5997/8773/81/29927/55002/53827/10916/6335/537/308/284439/523/219931/3306/10312/6575/784/351/55858/808/7466/54795/7991/1528/392/1535/967/84286/155066/567/51393/4638/857/57153/1346/6347/5159/7070/2621
GO:0002790	peptide secretion	39	77	0.506494	-0.277732	-1.62255	0.0196078	0.0421816	881	tags=51%, list=34%, signal=34%	83786/818/9727/2641/3685/6616/7114/3710/3418/7128/1363/26286/6352/57555/285381/51768/23568/308/7424/284/291/10312/301/5066/8764/6422/54795/64285/1803/6513/2615/51092/114902/9636/3553/57333/7292/4053/2621
GO:0002443	leukocyte mediated immunity	69	138	0.5	-0.390909	-2.60691	0.00125786	0.0102666	659	tags=50%, list=25%, signal=39%	29/3958/7077/317/8560/975/2934/10159/535/8773/847/2683/9961/51071/9145/25797/9588/2720/203068/715/3920/7414/10312/1508/8907/5660/55754/2799/2896/8566/58485/5329/1727/4831/5236/10577/8836/54795/5476/5880/29952/94103/5328/961/1535/10092/967/3074/10417/4126/230/567/1650/28988/8635/5547/960/23385/11010/57153/968/3553/3575/10970/1265/1075/83716/7292/10875
GO:0097435	supramolecular fiber organization	71	142	0.5	-0.413092	-2.76373	0.00126743	0.0102666	638	tags=50%, list=25%, signal=40%	22921/1639/64780/25999/5239/2934/11034/5217/7016/5358/81/9873/3611/9181/23433/10552/6281/84695/7126/26585/10093/8766/1303/2017/4131/4921/4739/201191/6624/7837/351/3693/84171/5352/10096/10278/55616/6422/5880/9168/961/1465/71/10092/4015/567/28988/91663/7169/165/51466/7184/871/50861/1410/87/3688/4130/10486/7168/1289/1290/4239/5351/5033/4053/10516/5159/1281/1277/1278
GO:0006811	ion transport	100	201	0.497512	-0.231987	-1.63162	0.00842359	0.0218558	903	tags=50%, list=35%, signal=35%	92579/4891/9973/23155/9213/483/818/5468/2641/3685/6616/7114/8992/3710/23530/1345/7402/823/80727/284129/124565/10550/2539/475/55129/79026/2542/5025/6687/207/11182/6352/3927/3958/4697/57555/347734/481/113655/56996/145389/10063/535/5997/80765/8773/81/29927/55002/53827/10916/6335/537/308/284439/291/523/219931/3306/9123/10312/6575/784/5660/55754/301/351/11000/23443/6277/5360/55858/808/7466/25932/10577…
GO:0098657	import into cell	66	133	0.496241	-0.3455	-2.2777	0.00127877	0.0102666	696	tags=50%, list=27%, signal=38%	4641/558/8724/3636/29/3958/57555/4043/481/25999/56996/975/2934/5997/81/9873/23433/10552/84695/1012/26585/10093/133/3190/284/4627/30846/2017/10938/858/301/7048/351/8406/88455/84171/4037/808/10096/60/54795/5054/54453/961/928/1535/7057/71/10092/967/84286/10417/26020/567/28988/6272/7184/3959/857/3688/3553/811/4240/6347/7052/2621
GO:0048193	Golgi vesicle transport	37	75	0.493333	-0.284218	-1.64792	0.0155807	0.0355074	789	tags=49%, list=30%, signal=35%	3996/54732/91461/10484/339122/2159/10945/26286/3916/1639/10121/51614/51226/57410/11014/8773/6892/51124/11018/10490/6396/9554/378/9871/58485/51014/9905/5627/10133/10791/56681/23423/6272/1294/1075/11015/2621
GO:0030155	regulation of cell adhesion	62	126	0.492063	-0.408138	-2.64995	0.00130208	0.0102666	616	tags=49%, list=24%, signal=39%	94/975/2934/64332/3280/6494/81/4582/10507/3611/23654/53827/6695/780/6281/84695/1012/59339/284/4921/4739/301/7048/3956/8764/3678/6422/1307/5880/10272/5054/5328/1803/961/928/7057/652/55558/2615/91663/960/3675/8654/857/3553/57045/3371/3575/114897/811/7010/7168/3911/7045/2192/7292/6347/8728/7052/10875/7070/1277
GO:0050878	regulation of body fluid levels	47	96	0.489583	-0.484379	-2.98198	0.00137552	0.0102666	463	tags=49%, list=18%, signal=42%	308/8766/133/7414/4627/595/30846/8323/29071/2629/10938/3065/79001/5066/5329/7466/7035/60/7094/5627/3047/10398/5054/5328/928/1465/1535/7057/71/231/5547/3048/2151/54843/10627/857/50808/2/114897/2152/2192/1281/9076/2621/5327/1277/1278
GO:0060627	regulation of vesicle-mediated transport	37	76	0.486842	-0.311476	-1.8091	0.00853485	0.0220699	705	tags=49%, list=27%, signal=36%	5898/558/3916/8724/29/3958/4043/64780/25999/5217/81/1012/537/26585/8766/3190/284/30846/10938/301/88455/808/5880/65009/56681/392/5054/961/1535/967/567/857/3553/811/4240/6347/2621
GO:0010810	regulation of cell-substrate adhesion	24	50	0.48	-0.418837	-2.19341	0.00151057	0.0102666	560	tags=48%, list=22%, signal=38%	81/3611/6695/780/6281/1012/59339/4921/4739/3956/3678/6422/1307/5880/5054/5328/7057/91663/3675/811/7010/2192/7070/1277
GO:0052548	regulation of endopeptidase activity	31	65	0.476923	-0.345652	-1.95106	0.00436047	0.0148179	655	tags=48%, list=25%, signal=37%	7077/317/831/64780/7076/2934/5176/6695/64065/56925/5720/3065/351/51232/334/5329/7035/5627/5054/7057/1293/1294/960/1611/871/1410/2/2152/8434/2621/2537
GO:0051271	negative regulation of cellular component movement	35	74	0.472973	-0.362994	-2.11141	0.00140845	0.0102666	616	tags=47%, list=24%, signal=37%	94/7076/5217/5176/81/10507/3611/22846/127435/3488/4681/26585/7414/114757/6237/11188/2022/25932/6422/65009/5054/928/7057/1634/55558/51466/87/811/7168/2192/6347/8434/1281/7070/8519
GO:0051346	negative regulation of hydrolase activity	34	72	0.472222	-0.343063	-1.9881	0.00286123	0.0137074	656	tags=47%, list=25%, signal=36%	3958/7077/831/64780/94274/7076/5997/5176/10507/6695/56925/301/351/51232/334/5329/7035/5627/5054/7057/1293/1266/6272/1294/960/871/1410/54843/2/90853/1893/8434/2621/2537
GO:0050900	leukocyte migration	33	70	0.471429	-0.479445	-2.76556	0.00143062	0.0102666	456	tags=47%, list=18%, signal=40%	26585/7424/284/4627/9123/301/351/3672/8764/3678/83700/54795/5627/5880/5054/961/928/7057/83692/960/4267/3675/857/3688/3553/811/7010/1893/6347/7070/2621/1277/1278
GO:0040017	positive regulation of locomotion	46	98	0.469388	-0.378504	-2.33919	0.00136799	0.0102666	577	tags=47%, list=22%, signal=38%	3315/81/10507/3611/3488/9181/9510/1012/8766/7424/284/4921/4739/858/301/7048/2896/351/152007/8764/3678/5880/5054/27286/5328/80781/7057/652/83692/3912/6648/91663/4267/3675/4638/81029/857/3688/3553/811/7010/2152/5159/7070/2621/1277
GO:0046903	secretion	122	260	0.469231	-0.371053	-2.70851	0.00117371	0.0102666	666	tags=47%, list=26%, signal=39%	6352/29/3958/7077/317/57555/285381/8560/64780/7076/2934/8407/10159/535/5217/8773/81/847/2683/9961/51768/51071/9145/10916/780/25797/23568/10490/9588/537/2720/308/9805/8766/203068/7424/133/284/3920/7414/4627/595/291/10312/23275/1508/8907/5660/55754/301/2799/2896/8566/11188/351/2022/5066/58485/334/5329/1727/808/8764/4831/5236/7094/6422/10577/8836/54795/5476/5627/5880/51706/64285/29952/5054/94103/532…
GO:0030335	positive regulation of cell migration	45	96	0.46875	-0.376603	-2.31848	0.00137552	0.0102666	577	tags=47%, list=22%, signal=38%	3315/81/10507/3611/3488/9181/9510/1012/8766/7424/284/4921/4739/301/7048/2896/351/152007/8764/3678/5880/5054/27286/5328/80781/7057/652/83692/3912/6648/91663/4267/3675/4638/81029/857/3688/3553/811/7010/2152/5159/7070/2621/1277
GO:2000147	positive regulation of cell motility	45	96	0.46875	-0.376603	-2.31848	0.00137552	0.0102666	577	tags=47%, list=22%, signal=38%	3315/81/10507/3611/3488/9181/9510/1012/8766/7424/284/4921/4739/301/7048/2896/351/152007/8764/3678/5880/5054/27286/5328/80781/7057/652/83692/3912/6648/91663/4267/3675/4638/81029/857/3688/3553/811/7010/2152/5159/7070/2621/1277
GO:0006954	inflammatory response	48	103	0.466019	-0.306901	-1.90904	0.00275862	0.0137074	695	tags=47%, list=27%, signal=35%	558/207/11343/8460/6352/29/975/7076/25825/64332/5176/8773/2683/84695/6335/133/715/2629/10312/56925/301/2896/351/4258/83700/5627/2167/5054/3588/961/1535/7057/5731/5547/26471/960/23643/968/3553/2/7010/1893/1075/2152/7292/6347/2353/7052
GO:0001666	response to hypoxia	33	71	0.464789	-0.293656	-1.69445	0.017192	0.0383821	686	tags=46%, list=27%, signal=35%	57085/207/317/481/94/81/847/23576/22937/7424/133/25994/5720/114757/7048/5066/5352/6422/677/5034/5328/1803/6513/1535/7057/7184/1410/857/4000/7010/9124/5351/5327
GO:0051272	positive regulation of cellular component movement	46	99	0.464646	-0.370998	-2.28806	0.00137741	0.0102666	577	tags=46%, list=22%, signal=38%	3315/81/10507/3611/3488/9181/9510/1012/8766/7424/284/4921/4739/301/7048/2896/351/152007/8764/3678/54795/5880/5054/27286/5328/80781/7057/652/83692/3912/6648/91663/4267/3675/4638/81029/857/3688/3553/811/7010/2152/5159/7070/2621/1277
GO:0062012	regulation of small molecule metabolic process	48	104	0.461538	0.330382	2.43285	0.00355872	0.0137074	686	tags=46%, list=27%, signal=35%	3638/3949/6319/2194/650/6713/2222/79602/8660/2308/2171/3157/4953/8480/5166/23411/219743/31/5743/2648/2033/23165/81929/5581/10296/5695/3037/5771/1353/5901/55022/9619/5706/11266/201626/5718/654/6720/79071/8445/160760/10059/136/129401/90007/5694/23636/6667
GO:0072331	signal transduction by p53 class mediator	28	61	0.459016	0.321737	2.03802	0.00309598	0.0137074	613	tags=46%, list=24%, signal=36%	4839/10419/84154/64782/23212/23411/54971/2033/9521/112858/1859/2309/8493/55003/94241/8805/23378/8738/1026/84126/4850/10210/6877/23612/54700/1459/6874/8445
hsa05165	Human papillomavirus infection	32	70	0.457143	-0.464708	-2.68565	0.00138504	0.00772947	433	tags=46%, list=17%, signal=39%	595/523/8323/10312/3065/10379/3693/4854/3672/3678/6199/1292/7057/1293/155066/1291/3912/1284/896/3675/81029/9636/3688/3371/3913/6773/3911/1282/5159/4599/1277/1278
GO:0001503	ossification	40	88	0.454545	-0.323432	-1.96182	0.00417827	0.0147198	685	tags=45%, list=26%, signal=35%	207/9249/3636/649/1462/10140/22801/847/10507/3611/2132/3488/4882/1305/537/26585/4921/10312/1009/56975/6422/54795/1513/10272/652/1291/4015/2201/6272/9636/57045/3371/7010/1893/338773/1290/1277/8519/115908/1278
GO:0036293	response to decreased oxygen levels	34	75	0.453333	-0.278341	-1.61384	0.0155807	0.0355074	686	tags=45%, list=27%, signal=34%	57085/207/317/481/94/81/847/23576/22937/7424/133/25994/5720/114757/784/7048/5066/5352/6422/677/5034/5328/1803/6513/1535/7057/7184/1410/857/4000/7010/9124/5351/5327
GO:0030334	regulation of cell migration	76	168	0.452381	-0.373166	-2.56245	0.00123457	0.0102666	577	tags=45%, list=22%, signal=38%	3315/5217/5176/81/8543/10507/3611/22846/127435/3488/9181/4681/23654/9510/1012/26585/8766/7424/284/7414/4921/4739/114757/6237/301/7048/2896/11188/351/2022/152007/8764/3678/25932/83700/6422/5880/9168/65009/5054/27286/5328/928/80781/7057/1634/652/55558/83692/3912/6648/91663/5547/51466/4267/3675/4638/81029/857/3688/3553/811/4000/7010/7168/3911/1893/2152/6347/8434/5159/1281/7070/2621/1277/8519
GO:0016477	cell migration	118	262	0.450382	-0.371157	-2.70447	0.00117786	0.0102666	621	tags=45%, list=24%, signal=38%	481/22801/94/975/7076/8742/3280/3315/5217/5176/81/8543/2683/10507/3611/22846/127435/3488/9181/4681/23654/6695/780/9510/5754/7126/1012/26585/8766/7424/284/7414/4627/2017/4131/4921/4739/9123/114757/6237/301/6624/7048/2896/378/11188/351/3693/2022/152007/3672/8764/3678/25932/10278/55616/83700/6422/54795/5627/5880/9168/64285/65009/55742/5054/27286/5328/1803/961/928/80781/7057/1634/10092/652/967/3074/5…
GO:0051049	regulation of transport	113	251	0.450199	-0.205405	-1.48731	0.0189125	0.0410306	881	tags=45%, list=34%, signal=33%	83786/483/818/5468/9727/2641/3685/6616/7114/3710/3418/7402/823/3303/22885/7128/10550/91461/2539/79026/9638/55198/5025/9270/5898/4641/558/3916/8724/207/6352/55741/29/3958/57555/4043/285381/64780/481/25999/975/10063/5217/5997/81/51768/53827/23433/23568/1012/6335/537/308/26585/8766/7424/3190/284/291/30846/219931/4131/3306/10938/10312/23275/784/55754/301/351/88455/5066/5360/808/7466/8764/60/25932/642…
GO:0034504	protein localization to nucleus	27	60	0.45	0.255308	1.61446	0.0155763	0.0355074	684	tags=45%, list=26%, signal=34%	5514/1736/29107/705/84154/23212/5743/10155/54971/10576/9221/908/10574/25942/1434/54984/5901/1026/6950/23633/10210/55696/5295/10694/129401/22948/23636
hsa04151	PI3K-Akt signaling pathway	26	58	0.448276	-0.4487	-2.49624	0.0014245	0.00772947	450	tags=45%, list=17%, signal=38%	7424/284/595/3693/3672/3678/6199/1292/7057/1293/1291/3912/1284/7184/896/3675/3688/3371/3575/3913/7010/3911/1282/5159/1277/1278
GO:0061024	membrane organization	64	143	0.447552	-0.240701	-1.61312	0.0189873	0.0410768	797	tags=45%, list=31%, signal=33%	3303/54732/57142/10484/9697/55198/30011/5898/26286/8724/6687/207/53947/10618/57555/1639/481/2934/8773/6892/9873/9145/10552/6281/10490/10093/8766/23673/6396/4627/30846/2017/9554/858/5660/55754/301/57048/9871/58485/808/26509/10096/60/56681/928/7057/71/10092/84286/51308/91663/1294/22883/121601/857/3575/811/4000/4240/1289/1075/4599/2621
GO:0008015	blood circulation	34	76	0.447368	-0.310213	-1.80177	0.0113798	0.0268726	722	tags=45%, list=28%, signal=33%	5025/9270/57085/207/29/481/94/10159/5997/23576/4882/7424/133/284/784/11188/6444/1727/808/26509/3672/54795/59342/1535/59/27129/6648/5547/8654/857/7010/7168/2621/1278
GO:0030336	negative regulation of cell migration	29	65	0.446154	-0.331703	-1.87232	0.00581395	0.0169942	616	tags=45%, list=24%, signal=35%	94/7076/5217/5176/3611/22846/127435/3488/4681/26585/7414/114757/6237/11188/2022/25932/6422/65009/5054/7057/1634/51466/811/7168/6347/8434/1281/7070/8519
GO:0045944	positive regulation of transcription by RNA polymerase II	99	222	0.445946	0.237705	2.08669	0.00595238	0.0169942	806	tags=45%, list=31%, signal=34%	3638/4609/23175/2247/650/55122/10370/10153/23082/10135/6664/2308/55859/26993/4929/1959/1906/55252/5977/64783/6294/467/2296/7555/23411/1051/1649/8325/253461/2648/2033/3725/10987/9935/5324/7337/8812/3516/23314/2309/7702/4691/196/51742/6018/7572/902/2908/3096/26574/25942/4780/155061/6299/6926/55022/7589/468/10001/359948/9519/5706/23558/6599/9241/2114/4520/23633/23076/30812/4097/654/6720/55922/6874/5…
GO:2000145	regulation of cell motility	78	175	0.445714	-0.371854	-2.56274	0.00123001	0.0102666	577	tags=45%, list=22%, signal=37%	3315/5217/5176/81/8543/10507/3611/22846/127435/3488/9181/4681/23654/9510/1012/308/26585/8766/7424/284/7414/4921/4739/114757/6237/301/7048/2896/11188/351/2022/152007/8764/3678/25932/83700/6422/5880/9168/65009/5054/27286/5328/928/80781/7057/1634/652/55558/83692/3912/6648/91663/5547/51466/4267/3675/4638/81029/857/3688/3553/811/4000/7010/7168/3911/1893/2152/2192/6347/8434/5159/1281/7070/2621/1277/8519
GO:0051146	striated muscle cell differentiation	24	54	0.444444	-0.330397	-1.77046	0.011976	0.0281272	456	tags=44%, list=18%, signal=37%	975/5239/5997/3488/26585/4627/30846/10938/858/6444/26509/928/1465/71/652/115701/4015/6272/3688/811/4000/7168/338773/5159
GO:0001525	angiogenesis	46	104	0.442308	-0.339142	-2.11191	0.00138696	0.0102666	584	tags=44%, list=23%, signal=36%	8742/3315/5176/2683/23576/22846/1012/26585/7424/133/284/4627/6237/301/7048/2896/2022/4854/3678/25932/83700/6422/55742/5054/27286/80781/7057/1634/652/5547/1284/1464/857/3688/3553/4240/7010/3911/1893/2152/7045/6347/1282/8434/5159/7070
GO:0001775	cell activation	106	240	0.441667	-0.368429	-2.66382	0.00117925	0.0102666	601	tags=44%, list=23%, signal=37%	7076/25825/2934/10159/64332/535/3280/3315/8773/8543/847/2683/9961/3611/51071/26022/9145/25797/84695/9588/2720/203068/3920/7414/4627/8323/29071/10312/1508/114757/8907/5660/55754/301/7048/2799/2896/8566/351/3956/58485/5329/1727/8764/4831/60/5236/7094/6422/10577/8836/5476/677/5880/29952/10398/94103/5328/1803/961/928/1465/1535/7057/71/10092/652/967/3074/4126/230/567/1650/2615/28988/4495/8635/5547/960…
GO:2000146	negative regulation of cell motility	30	68	0.441176	-0.335019	-1.91002	0.00433526	0.0147977	616	tags=44%, list=24%, signal=35%	94/7076/5217/5176/3611/22846/127435/3488/4681/26585/7414/114757/6237/11188/2022/25932/6422/65009/5054/7057/1634/51466/811/7168/2192/6347/8434/1281/7070/8519
GO:0048646	anatomical structure formation involved in morphogenesis	91	207	0.439614	-0.331915	-2.34432	0.00120192	0.0102666	616	tags=44%, list=24%, signal=36%	94/975/5239/2535/79600/6604/8742/3280/3315/5176/8543/2683/23576/3611/2132/22846/23654/9510/5754/1012/64065/157506/26585/7424/133/284/4627/1303/30846/8323/10938/10312/23275/3065/6237/301/7048/2896/3693/2022/4854/26509/56975/3678/9644/25932/83700/6422/55742/5054/27286/928/1465/80781/7057/71/1634/652/1291/3912/8506/2201/8463/1294/5547/1284/1464/3675/857/87/3688/3553/57045/4240/7010/7168/23187/1289/3…
GO:0051336	regulation of hydrolase activity	87	198	0.439394	-0.294837	-2.06966	0.00120773	0.0102666	713	tags=44%, list=28%, signal=34%	26086/9270/23102/26286/84168/207/6352/29/3958/7077/317/831/64780/94274/481/9459/51306/7076/2934/8853/5217/5997/6494/5176/10507/23654/6695/6281/55803/64065/3306/4739/56925/5720/858/3065/5660/301/2896/378/351/51232/115704/334/5329/808/3672/7035/9905/55616/6422/5627/392/5054/54453/30851/7057/1293/55558/1266/6272/7169/1294/960/7184/1611/871/50861/1410/54843/857/3688/2/57333/90853/5118/7168/1893/2152/…
GO:0003013	circulatory system process	34	78	0.435897	-0.301441	-1.76846	0.0111576	0.0265295	722	tags=44%, list=28%, signal=32%	5025/9270/57085/207/29/481/94/10159/5997/23576/4882/7424/133/284/784/11188/6444/1727/808/26509/3672/54795/59342/1535/59/27129/6648/5547/8654/857/7010/7168/2621/1278
GO:0048870	cell motility	118	273	0.432234	-0.375045	-2.75987	0.00115875	0.0102666	584	tags=43%, list=23%, signal=37%	8742/3280/3315/5217/5176/81/8543/2683/10507/3611/22846/127435/3488/9181/4681/23654/6695/780/9510/5754/7126/1012/308/26585/8766/7424/284/7414/4627/2017/4131/4921/4739/9123/114757/6237/301/6624/7048/2896/378/11188/351/3693/2022/5360/152007/3672/10096/8764/3678/60/25932/10278/55616/83700/6422/54795/5627/5880/9168/64285/65009/55742/5054/27286/5328/1803/961/928/80781/7057/1634/10092/652/967/3074/55558…
GO:0051674	localization of cell	118	273	0.432234	-0.375045	-2.75987	0.00115875	0.0102666	584	tags=43%, list=23%, signal=37%	8742/3280/3315/5217/5176/81/8543/2683/10507/3611/22846/127435/3488/9181/4681/23654/6695/780/9510/5754/7126/1012/308/26585/8766/7424/284/7414/4627/2017/4131/4921/4739/9123/114757/6237/301/6624/7048/2896/378/11188/351/3693/2022/5360/152007/3672/10096/8764/3678/60/25932/10278/55616/83700/6422/54795/5627/5880/9168/64285/65009/55742/5054/27286/5328/1803/961/928/80781/7057/1634/10092/652/967/3074/55558…
GO:0003008	system process	97	225	0.431111	-0.316432	-2.25524	0.00120048	0.0102666	686	tags=43%, list=27%, signal=35%	57085/207/339768/11343/115/9249/29/57555/1639/481/94/2535/1264/2934/10159/5997/5176/23576/4637/3488/4942/26022/4882/10916/6335/157506/8766/7424/133/284/7414/219931/2017/2629/56925/29995/784/5660/285440/378/11188/351/3693/6444/1727/808/26509/3672/7466/3678/7094/83700/54795/59342/7991/65009/10398/1535/80781/5731/652/3074/59/231/27129/51308/567/8506/6907/6648/7169/5547/51393/3675/4638/1410/23385/865…
GO:0051270	regulation of cellular component movement	80	186	0.430108	-0.354379	-2.45297	0.00122399	0.0102666	577	tags=43%, list=22%, signal=36%	3315/5217/5176/81/8543/10507/3611/22846/127435/3488/9181/4681/23654/9510/1012/308/26585/8766/7424/284/7414/4921/4739/114757/6237/301/7048/2896/11188/351/2022/152007/8764/3678/25932/83700/6422/54795/5880/9168/65009/5054/27286/5328/928/80781/7057/1634/652/55558/83692/3912/6648/91663/5547/51466/4267/3675/4638/81029/857/87/3688/3553/811/4000/7010/7168/3911/1893/2152/2192/6347/8434/5159/1281/7070/2621…
GO:0040012	regulation of locomotion	79	186	0.424731	-0.346344	-2.39735	0.00122399	0.0102666	577	tags=42%, list=22%, signal=36%	3315/5217/5176/81/8543/10507/3611/22846/127435/3488/9181/4681/23654/9510/1012/308/26585/8766/7424/284/7414/4921/4739/114757/858/6237/301/7048/2896/11188/351/2022/152007/8764/3678/25932/83700/6422/5880/9168/65009/5054/27286/5328/928/80781/7057/1634/652/55558/83692/3912/6648/91663/5547/51466/4267/3675/4638/81029/857/3688/3553/811/4000/7010/7168/3911/1893/2152/2192/6347/8434/5159/1281/7070/2621/1277…
GO:0003012	muscle system process	31	73	0.424658	-0.344373	-1.99429	0.00431034	0.0147977	438	tags=42%, list=17%, signal=36%	481/1264/2934/5997/4637/3488/7414/219931/2017/29995/3693/6444/808/26509/3672/7094/54795/10398/1535/59/7169/4638/1410/8654/10627/857/3553/800/4000/7168/72
GO:0002252	immune effector process	88	208	0.423077	-0.355365	-2.51224	0.00120482	0.0102666	595	tags=42%, list=23%, signal=35%	2934/10159/64332/535/8773/847/2683/9961/51071/26022/9145/10552/25797/84695/9588/2720/10093/203068/200316/284/91607/715/3920/7414/10312/1508/8907/5660/55754/301/10379/2799/2896/8566/351/3956/58485/5329/1727/10096/8764/4831/60/5236/10577/8836/54795/5476/5627/5880/29952/94103/3588/5328/961/10581/1535/71/10092/967/3074/10417/4126/230/567/1650/28988/8635/5547/960/23385/11010/9636/57153/968/3553/2/3575…
GO:0010038	response to metal ion	27	64	0.421875	-0.40844	-2.29899	0.00144509	0.0102666	463	tags=42%, list=18%, signal=36%	308/595/4502/10312/4489/351/79901/5066/808/25932/8836/1528/84557/2167/10272/7057/7390/2354/567/4495/4501/140576/23385/857/811/2353/9076
GO:2001233	regulation of apoptotic signaling pathway	35	83	0.421687	-0.287379	-1.71566	0.0125874	0.029473	685	tags=42%, list=26%, signal=32%	207/10616/3958/317/138151/2934/8742/3315/4582/9181/3190/25994/2017/114971/3065/8406/5329/7466/6422/5034/5054/7057/652/81618/6648/26471/960/9500/857/3553/8682/4000/10962/1075/2537
GO:0040013	negative regulation of locomotion	32	76	0.421053	-0.315037	-1.82979	0.0056899	0.0169942	616	tags=42%, list=24%, signal=33%	94/7076/5217/5176/10507/3611/22846/127435/3488/4681/26585/7414/114757/6237/11188/2022/25932/6422/65009/5054/7057/1634/55558/51466/811/7168/2192/6347/8434/1281/7070/8519
GO:0006928	movement of cell or subcellular component	131	313	0.41853	-0.346769	-2.6027	0.00114416	0.0102666	621	tags=42%, list=24%, signal=36%	481/22801/94/975/10121/7076/8742/3280/3315/5217/5176/81/8543/2683/4637/10507/3611/22846/127435/3488/9181/4681/23654/6695/780/9510/5754/7126/1012/308/26585/8766/7424/284/7414/4627/2017/4131/4921/4739/9123/114757/6237/301/6624/7048/2896/378/11188/351/3693/6444/66008/2022/5360/152007/3672/10096/8764/3678/60/25932/10278/55616/83700/6422/54795/5627/5880/9168/64285/65009/55742/5054/27286/5328/1803/961/…
GO:0032970	regulation of actin filament-based process	30	72	0.416667	-0.326199	-1.89037	0.00572246	0.0169942	595	tags=42%, list=23%, signal=33%	2934/11034/5217/7016/9873/3611/23433/10552/6281/10093/4627/2017/6624/5066/10096/55616/83700/6422/54795/9168/961/10092/28988/91663/51466/857/1265/7010/7168/5159
GO:0051050	positive regulation of transport	57	137	0.416058	-0.260316	-1.72529	0.00509554	0.0161412	742	tags=42%, list=29%, signal=31%	9638/55198/5025/9270/4641/558/3916/207/6352/55741/29/3958/57555/481/25999/975/10063/81/51768/23433/537/26585/7424/3190/284/30846/3306/10938/784/55754/301/5360/808/7466/8764/60/54795/5880/56681/5054/961/1535/967/567/51393/4638/54843/857/3553/114897/811/4240/7292/6347/5159/7070/2621
GO:0072503	cellular divalent inorganic cation homeostasis	24	58	0.413793	-0.400925	-2.19542	0.00147275	0.0102666	463	tags=41%, list=18%, signal=35%	308/133/219931/4502/10312/4489/784/351/55858/808/7466/54795/1535/5731/3074/4495/4501/7184/2151/857/114897/811/7052/7070
GO:0032956	regulation of actin cytoskeleton organization	26	63	0.412698	-0.319079	-1.78631	0.00588235	0.0169942	595	tags=41%, list=23%, signal=33%	2934/11034/5217/7016/9873/3611/23433/10552/6281/10093/2017/6624/5066/10096/55616/83700/6422/9168/961/10092/28988/91663/51466/7010/7168/5159
GO:0045321	leukocyte activation	85	206	0.412621	-0.325743	-2.30258	0.0011976	0.0102666	595	tags=41%, list=23%, signal=35%	2934/10159/64332/535/3280/8773/847/2683/9961/51071/26022/9145/25797/84695/9588/2720/203068/3920/7414/4627/10312/1508/8907/5660/55754/301/7048/2799/2896/8566/351/3956/58485/5329/1727/8764/4831/5236/6422/10577/8836/5476/677/5880/29952/94103/5328/1803/961/1535/7057/10092/652/967/3074/4126/230/567/1650/2615/28988/4495/8635/5547/960/896/23385/8654/11010/857/57153/3688/968/3553/57045/3575/10970/1265/10…
GO:0040011	locomotion	122	297	0.410774	-0.353547	-2.62624	0.00115875	0.0102666	584	tags=41%, list=23%, signal=36%	8742/3280/3315/5217/5176/81/8543/2683/10507/3611/22846/127435/3488/9181/4681/23654/6695/780/9510/5754/7126/1012/308/26585/8766/7424/284/7414/4627/2017/4131/4921/4739/9123/114757/858/6237/301/6624/7048/2896/378/11188/351/3693/2022/5360/5329/152007/3672/10096/8764/3678/60/25932/10278/55616/83700/6422/54795/5627/5880/9168/64285/65009/55742/5054/123920/27286/5328/1803/961/928/80781/7057/1634/10092/65…
GO:0006935	chemotaxis	32	79	0.405063	-0.329393	-1.94561	0.00277008	0.0137074	540	tags=41%, list=21%, signal=33%	10507/4681/23654/1012/26585/7424/284/301/351/5329/3672/83700/54795/5880/55742/5054/123920/5328/7057/652/55558/4015/23022/51466/3553/811/3913/2152/6347/1123/5159/2621
GO:0120035	regulation of plasma membrane bounded cell projection organization	36	89	0.404494	-0.293355	-1.7848	0.0069541	0.0187656	575	tags=40%, list=22%, signal=33%	5217/5997/5176/23258/10507/3611/23654/6695/23433/5754/25940/8766/2017/4131/55754/6624/2896/5064/3956/66008/115704/4831/6422/5880/65009/55558/81618/567/28988/51393/960/51466/3675/857/1123/7070
GO:0072507	divalent inorganic cation homeostasis	25	62	0.403226	-0.389415	-2.17432	0.00146199	0.0102666	463	tags=40%, list=18%, signal=34%	308/133/219931/4502/10312/4489/784/351/6444/55858/808/7466/54795/1535/5731/3074/4495/4501/7184/2151/857/114897/811/7052/7070
GO:0045785	positive regulation of cell adhesion	29	72	0.402778	-0.383935	-2.22496	0.00143062	0.0102666	494	tags=40%, list=19%, signal=34%	6281/1012/59339/284/4739/301/7048/3956/8764/3678/6422/1307/10272/1803/961/91663/960/3675/857/3553/3575/811/7010/7168/7292/6347/8728/7052/7070
GO:0035239	tube morphogenesis	67	167	0.401198	-0.289086	-1.98423	0.00123457	0.0102666	600	tags=40%, list=23%, signal=33%	2535/79600/8742/3280/3315/5176/8543/2683/23576/3611/22846/23654/780/5754/1012/157506/26585/7424/133/284/4627/8323/6237/301/7048/2896/6444/2022/4854/3678/25932/83700/6422/677/65009/55742/5054/27286/80781/7057/1634/652/4015/8463/5547/1284/1464/4638/9500/857/3688/3553/3371/4240/7010/3911/1893/2152/7045/6347/1282/8434/5159/1281/7052/7070/115908
GO:0043487	regulation of RNA stability	20	50	0.4	0.281952	1.69981	0.00588235	0.0169942	530	tags=40%, list=20%, signal=32%	1736/26135/55802/4670/56915/23367/9698/23369/54512/6418/5695/51010/90806/8570/51441/8087/5706/201626/10949/5718
GO:0042330	taxis	32	80	0.4	-0.322285	-1.90719	0.0055325	0.0169942	540	tags=40%, list=21%, signal=33%	10507/4681/23654/1012/26585/7424/284/301/351/5329/3672/83700/54795/5880/55742/5054/123920/5328/7057/652/55558/4015/23022/51466/3553/811/3913/2152/6347/1123/5159/2621
GO:0006909	phagocytosis	20	50	0.4	-0.379597	-1.98791	0.00302115	0.0137074	454	tags=40%, list=18%, signal=34%	10093/4627/301/8406/10096/60/961/1535/7057/71/10092/84286/10417/3688/3553/811/4240/6347/7052/2621
GO:0070482	response to oxygen levels	33	83	0.39759	-0.304346	-1.81696	0.00839161	0.0218466	560	tags=40%, list=22%, signal=32%	81/847/23576/22937/537/7424/133/25994/523/5720/114757/784/7048/5066/5352/6422/677/5034/5328/1803/6513/1535/7057/7184/1410/857/4000/7010/9124/5351/5159/5327/1277
GO:0000902	cell morphogenesis	62	156	0.397436	-0.340931	-2.31579	0.00125628	0.0102666	540	tags=40%, list=21%, signal=33%	10507/3611/9181/4681/23654/54961/23433/780/6281/1012/26585/8766/7414/4627/1303/2017/4131/29071/10979/4739/301/1009/5064/351/66008/6277/9204/3672/60/5880/55742/1292/80781/1293/3074/55558/1291/3912/28988/8506/51092/91663/1294/51393/23022/960/51466/87/3688/4130/3575/811/3913/10486/1004/7010/7168/3911/2192/6347/1123/7070
GO:0048729	tissue morphogenesis	48	121	0.396694	-0.274847	-1.76061	0.00398936	0.014452	646	tags=40%, list=25%, signal=31%	83605/317/94/2535/79600/3280/8543/3611/2132/3488/23654/780/5754/157506/7424/133/7414/1303/8323/23275/5720/7048/2022/3678/6422/65009/1292/1293/652/59/1291/8463/1294/960/3675/4638/9500/3688/57045/3371/7168/1289/3911/1282/1281/7052/115908/72
GO:0006936	muscle contraction	21	53	0.396226	-0.410407	-2.19878	0.0014771	0.0102666	438	tags=40%, list=17%, signal=34%	7414/219931/2017/3693/6444/808/26509/3672/7094/54795/10398/59/7169/4638/1410/8654/10627/857/800/7168/72
GO:0031344	regulation of cell projection organization	36	91	0.395604	-0.274871	-1.68019	0.0110193	0.026282	575	tags=40%, list=22%, signal=32%	5217/5997/5176/23258/10507/3611/23654/6695/23433/5754/25940/8766/2017/4131/55754/6624/2896/5064/3956/66008/115704/4831/6422/5880/65009/55558/81618/567/28988/51393/960/51466/3675/857/1123/7070
GO:0042692	muscle cell differentiation	29	74	0.391892	-0.274429	-1.59625	0.0239437	0.0497913	612	tags=39%, list=24%, signal=31%	975/5239/6604/3280/5997/3488/26585/133/4627/30846/10938/858/6444/2022/26509/928/1465/71/652/115701/4015/6648/6272/3688/811/4000/7168/338773/5159
GO:0022604	regulation of cell morphogenesis	29	74	0.391892	-0.32576	-1.89483	0.00422535	0.0147977	560	tags=39%, list=22%, signal=32%	81/10507/3611/23654/23433/6281/8766/4627/2017/4131/10979/4739/301/5064/66008/9204/55742/3074/55558/28988/91663/51393/960/811/7168/2192/6347/1123/7070
GO:0120036	plasma membrane bounded cell projection organization	76	195	0.389744	-0.287641	-2.01013	0.00121212	0.0102666	627	tags=39%, list=24%, signal=32%	1639/9459/10121/2934/79600/3280/5217/26227/5997/5176/23258/10507/3611/4681/23654/53827/6695/23433/780/5754/25940/1012/8766/203068/133/7414/4627/2017/4131/10938/201191/55754/1009/6624/2896/5064/378/351/3956/66008/6277/115704/3672/10096/4831/60/83700/6422/5880/65009/55742/10092/55558/81618/567/3912/28988/8506/51393/23022/960/51466/3675/4638/50861/857/3688/4130/3371/3913/7846/7168/3911/1123/7070/115…
GO:0032989	cellular component morphogenesis	67	172	0.389535	-0.337631	-2.32128	0.00123305	0.0102666	540	tags=39%, list=21%, signal=33%	10507/3611/9181/4681/23654/54961/23433/780/6281/1012/26585/8766/7414/4627/1303/2017/4131/29071/10979/4739/301/1009/5064/351/66008/6277/9204/3672/60/5880/55742/1292/928/1465/80781/71/1293/3074/55558/1291/3912/28988/8506/51092/91663/1294/51393/23022/960/51466/87/3688/4130/3575/811/3913/10486/1004/7010/7168/23187/3911/2192/6347/1123/5159/7070
GO:0031175	neuron projection development	53	137	0.386861	-0.286439	-1.89842	0.00254777	0.0137074	590	tags=39%, list=23%, signal=32%	79600/3280/26227/5997/5176/23258/10507/3611/4681/23654/6695/780/5754/8766/133/7414/2017/4131/10938/201191/55754/1009/2896/378/351/3956/66008/6277/3672/4831/60/83700/6422/5880/65009/55558/81618/567/3912/28988/8506/51393/23022/51466/3675/50861/3688/4130/3371/3913/1123/7070/115908
GO:0061564	axon development	27	70	0.385714	-0.299276	-1.7263	0.0157368	0.0355975	540	tags=39%, list=21%, signal=31%	10507/3611/23654/780/8766/7414/2017/4131/1009/2896/351/66008/6277/60/83700/5880/55558/28988/51393/23022/51466/3688/4130/3371/3913/1123/7070
GO:0006874	cellular calcium ion homeostasis	20	52	0.384615	-0.373879	-1.97976	0.0029985	0.0137074	463	tags=38%, list=18%, signal=32%	308/133/219931/10312/784/351/55858/808/7466/54795/1535/5731/3074/7184/2151/857/114897/811/7052/7070
GO:0007159	leukocyte cell-cell adhesion	21	55	0.381818	-0.422556	-2.27612	0.00149031	0.0102666	370	tags=38%, list=14%, signal=33%	301/7048/3956/8764/3678/5880/1803/961/652/2615/960/8654/857/3688/3553/57045/3575/7292/6347/10875/7070
GO:0008284	positive regulation of cell proliferation	61	160	0.38125	-0.271669	-1.86202	0.00247525	0.0137074	616	tags=38%, list=24%, signal=31%	94/975/10063/7076/138151/6604/8742/3280/9236/6302/2683/3611/3488/780/9510/25940/1012/1397/26585/7424/133/595/4921/10312/858/3065/301/7048/2896/6277/4854/4831/6422/54795/5880/1803/961/1535/80781/7057/652/231/3912/3590/3688/3553/3371/3575/811/7010/1893/2152/338773/64759/7292/5159/7052/2621/81606/115908/57124
GO:0061448	connective tissue development	19	50	0.38	-0.431722	-2.26089	0.00151057	0.0102666	305	tags=38%, list=12%, signal=34%	54360/54795/1513/1292/1293/652/59/1291/4015/5307/1294/960/871/81029/1289/1893/7045/5159/1277
GO:0035295	tube development	77	203	0.37931	-0.280255	-1.97528	0.00120192	0.0102666	590	tags=38%, list=23%, signal=32%	79600/10159/8742/3280/3315/26227/5176/8543/847/2683/23576/3611/22846/3488/23654/780/5754/84695/1012/157506/26585/7424/133/284/4627/8323/6237/301/7048/2896/6444/2022/4854/3678/25932/83700/6422/677/65009/55742/10272/5054/27286/80781/7057/1634/652/231/4015/8463/5547/1284/1464/3675/4638/9500/857/3688/3553/57333/3371/4240/7010/3911/1893/2152/7045/83716/64759/6347/1282/8434/5159/1281/7052/7070/115908
GO:0071560	cellular response to transforming growth factor beta stimulus	22	58	0.37931	-0.418702	-2.29277	0.00147275	0.0102666	409	tags=38%, list=16%, signal=33%	10979/858/7048/3693/2022/6422/677/7057/4015/2615/2201/1284/3675/857/57045/27122/4053/2353/1281/9076/1277/1278
GO:0030030	cell projection organization	76	201	0.378109	-0.272206	-1.9145	0.00120337	0.0102666	627	tags=38%, list=24%, signal=31%	1639/9459/10121/2934/79600/3280/5217/26227/5997/5176/23258/10507/3611/4681/23654/53827/6695/23433/780/5754/25940/1012/8766/203068/133/7414/4627/2017/4131/10938/201191/55754/1009/6624/2896/5064/378/351/3956/66008/6277/115704/3672/10096/4831/60/83700/6422/5880/65009/55742/10092/55558/81618/567/3912/28988/8506/51393/23022/960/51466/3675/4638/50861/857/3688/4130/3371/3913/7846/7168/3911/1123/7070/115…
GO:0006875	cellular metal ion homeostasis	29	77	0.376623	-0.337767	-1.97328	0.00280112	0.0137074	468	tags=38%, list=18%, signal=32%	537/308/133/523/219931/4502/10312/4489/784/351/79901/55858/808/7466/51310/54795/1535/5731/3074/4738/4495/4501/7184/2151/857/114897/811/7052/7070
GO:0009888	tissue development	125	332	0.376506	-0.299144	-2.26373	0.00111857	0.0102666	616	tags=38%, list=24%, signal=33%	94/975/5239/7076/2535/2934/8407/79600/10159/3280/26227/5997/8543/847/2683/4637/10507/3611/2132/3488/23654/780/5754/84695/64065/147906/157506/26585/7424/133/7414/595/1303/8323/4921/10312/23275/78987/1508/5720/858/3065/5660/54507/301/7048/3693/6444/2022/152007/56975/54360/4831/3678/25932/6422/54795/677/1513/10791/341405/65009/5054/1292/928/1465/80781/1634/1293/652/115701/1266/59/1291/4015/230/3912/…
GO:0007399	nervous system development	130	346	0.375723	-0.202268	-1.53565	0.00556174	0.0169942	742	tags=38%, list=29%, signal=31%	9638/23213/55198/30011/7869/2009/9445/5025/6594/28996/26086/5898/51604/558/79414/8724/6687/207/1462/8745/29/7077/317/57555/1639/10063/2535/25825/2934/79600/10159/6604/3280/6867/26227/5997/5176/8543/23258/10507/3611/6240/9181/4681/26022/23654/54674/6695/780/5754/84695/8766/7424/133/7414/8323/2017/4131/10938/10312/79094/3065/201191/5660/55754/301/1009/7048/2896/5064/378/351/3956/66008/51232/2022/50…
GO:0055074	calcium ion homeostasis	21	56	0.375	-0.362534	-1.96407	0.00298063	0.0137074	463	tags=38%, list=18%, signal=31%	308/133/219931/10312/784/351/6444/55858/808/7466/54795/1535/5731/3074/7184/2151/857/114897/811/7052/7070
GO:0052547	regulation of peptidase activity	28	75	0.373333	-0.394859	-2.28942	0.00141643	0.0102666	397	tags=37%, list=15%, signal=33%	56925/5720/3065/2896/351/51232/334/5329/7035/5627/5054/7057/1293/1294/960/1611/871/1410/857/2/57333/5118/1893/2152/2192/8434/2621/2537
GO:0048666	neuron development	54	145	0.372414	-0.267153	-1.79264	0.00508259	0.0161412	600	tags=37%, list=23%, signal=30%	2535/79600/3280/26227/5997/5176/23258/10507/3611/4681/23654/6695/780/5754/8766/133/7414/2017/4131/10938/201191/55754/1009/2896/378/351/3956/66008/6277/3672/4831/60/83700/6422/5880/65009/55558/81618/567/3912/28988/8506/51393/23022/51466/3675/50861/3688/4130/3371/3913/1123/7070/115908
GO:0072359	circulatory system development	77	208	0.370192	-0.279826	-1.97821	0.00120482	0.0102666	585	tags=37%, list=23%, signal=31%	6604/8742/3280/3315/5997/5176/8543/2683/23576/3611/22846/9510/5754/1012/55803/26585/7424/133/284/4627/78987/6237/162/301/7048/2896/64359/6444/2022/5066/4854/3678/25932/83700/6422/677/65009/55742/5054/27286/80781/7057/1634/652/115701/59/27129/4015/6648/8463/5547/1284/1464/3675/4638/857/3688/3553/811/4000/4240/7010/7168/1289/3911/1893/9124/2152/7045/6347/1282/8434/5159/1281/7070/1277/1278
GO:0006955	immune response	121	327	0.370031	-0.318535	-2.40441	0.0011236	0.0102666	588	tags=37%, list=23%, signal=33%	10159/64332/8742/535/8773/29927/6892/847/4582/2683/9961/10507/22937/51071/9181/26022/9145/10552/25797/84695/7126/9588/2720/10093/2217/203068/200316/284/715/3920/7414/4502/10312/1508/5720/8907/784/5660/55754/301/10379/7837/2799/2896/8566/351/3956/58485/5329/1727/10096/8764/4831/60/5236/83700/10577/8836/54795/5476/1513/5627/5880/10133/29952/123920/94103/3588/5328/961/10581/1535/7057/71/10092/967/30…
GO:0048598	embryonic morphogenesis	39	106	0.367925	-0.259925	-1.62385	0.0178817	0.0391303	600	tags=37%, list=23%, signal=29%	2535/79600/3280/8543/2132/23654/5754/157506/7424/133/1303/8323/23275/3065/7048/3693/2022/3678/6422/677/65009/652/1291/3912/5307/2201/8463/91663/1294/1284/3675/3688/57045/23187/1289/3911/1290/8434/115908
GO:0071559	response to transforming growth factor beta	22	60	0.366667	-0.406477	-2.24398	0.00146843	0.0102666	409	tags=37%, list=16%, signal=32%	10979/858/7048/3693/2022/6422/677/7057/4015/2615/2201/1284/3675/857/57045/27122/4053/2353/1281/9076/1277/1278
GO:0048468	cell development	116	317	0.365931	-0.267191	-2.00606	0.00114025	0.0102666	606	tags=37%, list=23%, signal=32%	5239/2535/25825/2934/79600/6604/3280/26227/5997/5176/81/23258/2683/10507/3611/9181/4681/26022/23654/4882/6695/780/6281/5754/537/157506/8766/7424/133/7414/4627/1303/2017/4131/29071/3306/10979/4739/10938/858/3065/201191/5660/55754/54507/1009/7048/2896/378/351/3956/6444/66008/2022/6277/4854/26509/3672/56975/4831/60/83700/6422/5880/65009/55742/1292/928/1465/80781/71/1293/652/115701/3074/55558/59/1291…
GO:0032103	positive regulation of response to external stimulus	19	52	0.365385	-0.382684	-2.02639	0.0029985	0.0137074	269	tags=37%, list=10%, signal=33%	2896/4258/5880/10133/2167/5054/961/1535/7057/26471/23643/3553/811/1075/2152/7292/5159/7052/2621
GO:0051094	positive regulation of developmental process	79	218	0.362385	-0.268026	-1.90828	0.0011976	0.0102666	586	tags=36%, list=23%, signal=31%	64332/6604/8742/3280/3315/5997/5176/23576/10507/3611/9181/4681/23654/54674/6281/5754/537/26585/8766/7424/133/595/30846/4131/4921/4739/10938/3065/6237/55754/301/7048/2896/2022/152007/56975/4831/3678/6422/54795/677/5479/65009/5054/27286/7057/1634/652/55558/567/28988/2201/6648/91663/51393/3675/22883/9500/8654/81029/9636/3688/3553/3575/811/4000/7010/23187/1893/2152/338773/7292/5159/2353/2621/81606/12…
GO:0010035	response to inorganic substance	38	105	0.361905	-0.359934	-2.2461	0.00137741	0.0102666	433	tags=36%, list=17%, signal=31%	595/4502/4131/10312/4489/5660/301/351/79901/5066/808/25932/8836/1528/84557/2167/10272/928/80781/7057/231/7390/2354/567/6648/4495/4501/140576/1410/23385/857/811/7292/10516/5159/2353/9076/1277
GO:0043687	post-translational protein modification	26	72	0.361111	-0.367909	-2.13209	0.00143062	0.0102666	389	tags=36%, list=15%, signal=32%	54972/8766/5720/351/3956/334/7466/56975/51088/11167/10130/5034/10272/122416/652/4738/3912/813/7184/3371/10970/4924/3913/4240/3490/2621
GO:0045597	positive regulation of cell differentiation	57	158	0.360759	-0.257852	-1.76222	0.005	0.0161345	586	tags=36%, list=23%, signal=30%	64332/6604/3280/5997/5176/10507/3611/9181/4681/23654/6281/5754/537/26585/8766/7424/133/30846/4131/4921/4739/10938/3065/55754/301/7048/2896/2022/152007/56975/4831/6422/54795/677/65009/5054/652/55558/28988/2201/6648/91663/51393/3675/8654/81029/9636/3553/3575/811/338773/7292/2353/2621/1277/8519/115908
GO:0055065	metal ion homeostasis	31	86	0.360465	-0.322587	-1.94719	0.00416667	0.0147198	468	tags=36%, list=18%, signal=31%	537/308/133/523/219931/4502/10312/4489/784/351/6444/79901/55858/808/7466/51310/54795/1535/5731/3074/4738/567/4495/4501/7184/2151/857/114897/811/7052/7070
GO:0032101	regulation of response to external stimulus	45	125	0.36	-0.316752	-2.05966	0.0012987	0.0102666	477	tags=36%, list=18%, signal=31%	1012/308/26585/7424/200316/715/2629/784/301/7048/2896/79001/5329/4258/7035/83700/5627/5880/10133/2167/5054/5328/961/928/1535/7057/55558/26471/23643/4925/857/3553/2/114897/811/7010/1075/2152/7292/6347/5159/7052/10875/2621/5327
GO:0048514	blood vessel morphogenesis	45	125	0.36	-0.320135	-2.08165	0.0012987	0.0102666	456	tags=36%, list=18%, signal=31%	26585/7424/133/284/4627/6237/301/7048/2896/6444/2022/4854/3678/25932/83700/6422/677/55742/5054/27286/80781/7057/1634/652/4015/8463/5547/1284/1464/4638/857/3688/3553/4240/7010/3911/1893/2152/7045/6347/1282/8434/5159/1281/7070
GO:0051052	regulation of DNA metabolic process	32	89	0.359551	0.271348	1.90478	0.00353357	0.0137074	524	tags=36%, list=20%, signal=30%	4609/2247/5514/7014/1736/2070/10419/5609/23411/604/253461/10155/23049/3725/23560/2956/9887/10576/6018/908/10574/51010/5515/54984/9984/1026/54726/57418/23529/23244/6950/6416
GO:0030003	cellular cation homeostasis	32	89	0.359551	-0.324256	-1.9728	0.00417246	0.0147198	468	tags=36%, list=18%, signal=30%	537/308/133/523/219931/4502/10312/4489/784/2896/351/79901/55858/808/7466/51310/54795/1535/5731/3074/84286/155066/4738/4495/4501/7184/2151/857/114897/811/7052/7070
GO:0022603	regulation of anatomical structure morphogenesis	67	187	0.358289	-0.260842	-1.81154	0.00121655	0.0102666	584	tags=36%, list=23%, signal=30%	8742/3280/3315/5176/81/23576/10507/3611/22846/23654/23433/6281/5754/26585/8766/7424/133/4627/30846/8323/2017/4131/10979/4739/10938/5720/6237/301/7048/2896/5064/66008/2022/9204/3678/6422/55742/5054/27286/7057/1634/652/3074/55558/28988/91663/51393/1284/960/9500/3688/3553/811/6773/7010/7168/23187/1289/1893/2152/1290/2192/6347/1123/8434/7070/115908
GO:0034622	cellular protein-containing complex assembly	72	202	0.356436	0.172755	1.48533	0.0233918	0.0488177	685	tags=36%, list=26%, signal=28%	3638/4839/50628/6128/10419/84154/23212/22907/83743/55299/56919/8664/51116/9997/23165/9328/1859/23369/708/10569/6418/10576/5581/1975/26284/79833/4728/902/3084/10146/255967/51187/10713/617/6046/4722/5433/56949/10001/23451/9519/5706/79003/6732/89795/8161/6122/6950/79738/3329/3308/6147/7508/10427/54700/157922/91746/11047/64963/51386/26054/8662/4733/8666/51773/10059/8661/25929/25909/163126/64425/5286
GO:0006873	cellular ion homeostasis	32	91	0.351648	-0.316944	-1.93737	0.00413223	0.0147198	468	tags=35%, list=18%, signal=30%	537/308/133/523/219931/4502/10312/4489/784/2896/351/79901/55858/808/7466/51310/54795/1535/5731/3074/84286/155066/4738/4495/4501/7184/2151/857/114897/811/7052/7070
GO:0001934	positive regulation of protein phosphorylation	53	151	0.350993	-0.241718	-1.6312	0.0152284	0.0350163	625	tags=35%, list=24%, signal=28%	64400/25999/94/975/9064/3280/5217/29937/10507/3611/9181/23568/537/26585/7424/284/595/25994/3306/4921/4739/858/5660/7048/351/2022/5329/808/152007/3672/8764/3678/65009/8099/7057/652/28988/5871/1464/960/896/9500/8654/857/3553/57045/8682/114897/7010/338773/6347/5159/2621
GO:0007167	enzyme linked receptor protein signaling pathway	72	206	0.349515	-0.315164	-2.2278	0.0011976	0.0102666	522	tags=35%, list=20%, signal=30%	3488/4681/4882/23433/10552/780/83464/1012/537/26585/10093/7424/284/523/10979/4921/10312/858/7048/378/351/3693/51232/2022/5329/26509/3672/10096/56975/3678/60/6422/11167/64285/65009/10272/1535/7057/71/1634/10092/652/967/155066/4015/2615/2201/6272/1284/1464/896/3675/23385/857/3553/57045/27122/7010/2152/5157/1123/4053/1282/5159/2353/1281/3489/2621/5327/1277/2537/1278
GO:0042327	positive regulation of phosphorylation	55	158	0.348101	-0.240266	-1.64203	0.01375	0.032	625	tags=35%, list=24%, signal=28%	64400/25999/94/975/9064/3280/5217/8543/29937/10507/3611/9181/23568/537/26585/7424/284/595/25994/3306/4921/4739/858/5660/7048/351/2022/5329/808/152007/3672/8764/3678/65009/8099/7057/652/28988/5871/26471/1464/960/896/9500/8654/857/3553/57045/8682/114897/7010/338773/6347/5159/2621
GO:0009636	response to toxic substance	35	101	0.346535	-0.316821	-1.96944	0.00273598	0.0137074	474	tags=35%, list=18%, signal=29%	9588/6335/595/4502/4131/4489/114757/5660/301/7837/64359/4258/808/60/8836/3047/2882/84557/2952/5445/567/6648/4495/4501/3048/26471/1410/2944/3371/4924/10516/5159/2353/9076/1277
GO:0001101	response to acid chemical	21	61	0.344262	-0.416709	-2.31035	0.00147275	0.0102666	303	tags=34%, list=12%, signal=31%	4831/6422/1307/928/1535/80781/231/1291/8463/81029/3371/3294/1290/7292/1282/5159/3490/1281/9076/1277/1278
GO:0006417	regulation of translation	32	93	0.344086	0.249967	1.75844	0.0035461	0.0137074	462	tags=34%, list=18%, signal=29%	8890/25983/7555/8664/5036/23367/9698/23369/23185/54517/10209/708/84541/2309/9221/4528/1975/23645/4691/84881/10131/2107/8872/5433/8570/22794/468/51441/5936/8087/10289/113251
GO:0022407	regulation of cell-cell adhesion	23	67	0.343284	-0.377078	-2.14943	0.00143266	0.0102666	370	tags=34%, list=14%, signal=30%	301/7048/3956/8764/10272/1803/961/928/652/2615/91663/960/8654/857/3553/57045/3575/114897/7292/6347/8728/10875/7070
GO:0042127	regulation of cell proliferation	99	289	0.342561	-0.250465	-1.85748	0.0023015	0.0137074	616	tags=34%, list=24%, signal=29%	94/975/10063/7076/138151/1264/6604/8742/3280/5176/9236/6302/2683/23576/3611/22846/127435/3488/9181/780/9510/26277/25940/1012/1397/26585/7424/133/284/595/4921/10312/858/3065/301/6196/7048/2896/351/8406/6277/4854/3672/8764/4831/6422/54795/677/5880/65009/5328/1803/961/30851/928/388610/1535/80781/7057/652/231/567/3912/2615/6648/26471/896/3590/9500/10608/8654/857/3688/3553/57045/3371/3575/811/4000/677…
GO:0007169	transmembrane receptor protein tyrosine kinase signaling pathway	50	146	0.342466	-0.299899	-2.01681	0.00126422	0.0102666	501	tags=34%, list=19%, signal=29%	23433/10552/780/83464/1012/537/26585/10093/7424/284/523/4921/10312/858/378/351/51232/5329/26509/3672/10096/56975/3678/60/64285/65009/1535/7057/71/1634/10092/967/155066/4015/6272/1284/1464/896/23385/3553/7010/2152/5157/1123/1282/5159/3489/5327/1277/2537
GO:0048545	response to steroid hormone	25	73	0.342466	-0.331445	-1.91943	0.00431034	0.0147977	467	tags=34%, list=18%, signal=29%	2720/133/595/2629/3065/301/7048/2022/5066/808/7035/6422/677/1535/7057/652/4015/2354/857/811/2353/3490/9076/81606/1277
GO:0051241	negative regulation of multicellular organismal process	74	217	0.341014	-0.249705	-1.77978	0.00119048	0.0102666	582	tags=34%, list=22%, signal=29%	3280/5217/5997/5176/23258/10544/10507/22846/3488/9181/26022/4882/6695/84695/147906/308/26585/133/284/2629/784/301/7048/2896/351/3956/66008/5329/4854/7035/4831/6422/54795/677/1513/5627/10272/5054/5328/80349/928/1535/7057/5731/1634/652/115701/55558/81618/567/2615/1284/51466/9246/8654/9636/3553/57045/114897/811/4000/7010/1289/1893/1075/338773/1290/7292/1281/10875/7070/2621/5327/10234
GO:0055080	cation homeostasis	34	100	0.34	-0.302586	-1.8672	0.00414365	0.0147198	468	tags=34%, list=18%, signal=29%	537/308/133/523/219931/4502/10312/4489/784/2896/351/6444/79901/55858/808/7466/51310/54795/1535/5731/3074/84286/155066/4738/567/4495/4501/7184/2151/857/114897/811/7052/7070
GO:0034248	regulation of cellular amide metabolic process	35	103	0.339806	0.246314	1.80371	0.00361011	0.0137074	462	tags=34%, list=18%, signal=29%	8890/25983/7555/5166/8664/5036/23367/9698/23369/23185/54517/10209/708/84541/2309/9221/4528/1975/23645/4691/84881/10131/2107/8872/4780/5433/8570/9619/22794/468/51441/5936/8087/10289/113251
GO:0035966	response to topologically incorrect protein	18	53	0.339623	-0.311521	-1.669	0.0206795	0.0438725	433	tags=34%, list=17%, signal=29%	595/3306/79094/55033/7466/7094/23753/10133/10130/10954/7057/27129/7184/871/811/4000/11015/6347
GO:0072593	reactive oxygen species metabolic process	18	53	0.339623	-0.351485	-1.88311	0.00443131	0.0149923	364	tags=34%, list=14%, signal=30%	7837/7048/378/9644/5880/3047/961/1535/7057/6648/5547/3048/1410/857/3553/10516/5159/2537
GO:0009653	anatomical structure morphogenesis	149	439	0.339408	-0.290151	-2.26022	0.0010917	0.0102666	544	tags=34%, list=21%, signal=32%	2683/23576/10507/3611/2132/22846/3488/9181/4681/23654/54961/23433/1305/780/6281/9510/5754/1012/64065/157506/26585/8766/7424/133/284/7414/4627/1303/30846/8323/2017/4131/29071/10979/4739/2629/10938/10312/23275/5720/3065/6237/301/1009/7048/2896/5064/351/3693/6444/66008/2022/5066/6277/9204/4854/26509/3672/56975/3678/9644/60/25932/83700/6422/677/5880/65009/55742/5054/27286/1292/928/388610/1465/80781/7…
GO:0050801	ion homeostasis	38	112	0.339286	-0.322729	-2.02901	0.00134953	0.0102666	468	tags=34%, list=18%, signal=29%	537/308/133/523/219931/4502/10312/4489/784/2896/351/6444/79901/55858/808/7466/51310/54795/1535/5731/1634/3074/84286/155066/4738/567/4495/4501/7184/2151/857/57333/114897/811/10962/7052/7070/2537
GO:0034976	response to endoplasmic reticulum stress	20	59	0.338983	-0.317447	-1.74067	0.0132548	0.0309413	433	tags=34%, list=17%, signal=29%	595/79094/160418/55033/8406/7466/7094/23753/10130/5034/10954/7057/26471/7184/857/57333/811/4000/11015/6347
GO:0098771	inorganic ion homeostasis	34	102	0.333333	-0.296235	-1.83831	0.00275482	0.0137074	468	tags=33%, list=18%, signal=28%	537/308/133/523/219931/4502/10312/4489/784/2896/351/6444/79901/55858/808/7466/51310/54795/1535/5731/3074/84286/155066/4738/567/4495/4501/7184/2151/857/114897/811/7052/7070
hsa05200	Pathways in cancer	29	87	0.333333	-0.307599	-1.87111	0.00413223	0.0132231	450	tags=33%, list=17%, signal=28%	7424/595/8323/3065/7048/4258/808/4854/5880/2952/6199/6513/5731/652/3912/1284/7184/896/3675/81029/2944/3688/3575/3913/6773/3911/1282/5159/2353
GO:0001568	blood vessel development	49	147	0.333333	-0.309464	-2.08688	0.00125945	0.0102666	382	tags=33%, list=15%, signal=30%	26585/7424/133/284/4627/6237/301/7048/2896/6444/2022/4854/3678/25932/83700/6422/677/55742/5054/27286/80781/7057/1634/652/59/4015/8463/5547/1284/1464/4638/857/3688/3553/4240/7010/1289/3911/1893/2152/7045/6347/1282/8434/5159/1281/7070/1277/1278
GO:0045861	negative regulation of proteolysis	22	67	0.328358	-0.376247	-2.14469	0.00143266	0.0102666	398	tags=33%, list=15%, signal=29%	79094/56925/351/51232/334/5329/7035/5627/5054/7057/1293/1294/960/871/1410/2/4130/1893/8434/2621/5327/2537
GO:0022008	neurogenesis	76	233	0.32618	-0.218505	-1.57173	0.0106888	0.0256532	600	tags=33%, list=23%, signal=28%	2535/25825/2934/79600/6604/3280/26227/5997/5176/8543/23258/10507/3611/9181/4681/26022/23654/6695/780/5754/8766/7424/133/7414/2017/4131/10938/79094/3065/201191/55754/301/1009/2896/378/351/3956/66008/6277/4854/3672/4831/60/83700/6422/5880/65009/928/652/3074/55558/81618/567/3912/28988/8506/51393/23022/1464/51466/3675/50861/23385/81029/3688/3553/4130/3371/811/3913/6347/1123/1281/7070/2621/115908
GO:0051130	positive regulation of cellular component organization	74	228	0.324561	-0.240252	-1.72021	0.00238095	0.0137074	578	tags=32%, list=22%, signal=28%	11034/5217/5997/7016/5176/81/9873/4582/10507/3611/23654/54674/23433/10552/6281/5754/25940/26585/10093/8766/3190/284/30846/2017/4131/4921/4739/2629/10938/55754/301/6624/2896/5064/351/5329/10096/4831/6422/1307/5880/10133/65009/5054/27286/961/80349/1535/1634/10092/967/55558/567/28988/91663/51393/51466/3675/22883/51750/857/3553/811/4000/4240/7010/7168/23187/10962/6347/5159/7070/9076/2621
GO:0019725	cellular homeostasis	49	151	0.324503	-0.289792	-1.95562	0.00126904	0.0102666	474	tags=32%, list=18%, signal=28%	9588/537/308/133/3920/523/219931/4502/79770/10312/4489/784/2896/351/64359/3956/79901/55858/808/7466/4831/51310/54795/5880/10130/5034/10954/94103/1535/5731/3074/84286/155066/4738/4015/51092/4495/4501/7184/2151/51750/857/4130/114897/811/6347/7052/7070/2621
GO:0050790	regulation of catalytic activity	121	374	0.323529	-0.218645	-1.67289	0.00222222	0.0137074	624	tags=32%, list=24%, signal=29%	64780/94274/481/9459/51306/975/10063/7076/9064/2934/8853/3315/5217/5997/7016/6494/5176/8543/9961/23576/10507/3611/23654/6695/6281/83464/23568/55803/64065/308/113791/26585/284/595/25994/57515/3306/4921/4739/2629/56925/1508/5720/114757/858/3065/5660/301/7048/2896/5064/378/351/51232/115704/334/5329/4258/808/83707/3672/7035/9905/9644/60/55616/6422/5476/5627/5880/2167/392/5054/54453/30851/1535/7057/12…
GO:0008283	cell proliferation	109	337	0.323442	-0.229062	-1.73762	0.00221729	0.0137074	616	tags=32%, list=24%, signal=28%	94/975/10063/7076/138151/1264/6604/8742/3280/6867/5176/9236/6302/2683/23576/3611/6240/22846/127435/3488/9181/23654/780/9510/26277/25940/1012/1397/26585/7424/133/284/595/8323/4921/10312/858/3065/301/6196/7048/2896/8566/351/8406/6277/4854/3672/8764/4831/6422/54795/677/5880/64285/65009/5328/1803/961/30851/928/388610/1535/80781/7057/652/231/567/3912/2615/6648/51092/26471/1464/896/3590/9500/23385/1060…
GO:0045595	regulation of cell differentiation	100	311	0.321543	-0.232795	-1.74853	0.00229095	0.0137074	586	tags=32%, list=23%, signal=28%	64332/6604/3280/5997/5176/81/8543/23258/10507/3611/3488/9181/4681/26022/23654/4882/6695/6281/5754/84695/537/147906/26585/8766/7424/133/595/30846/2017/4131/4921/4739/10938/10312/23275/5720/3065/55754/301/7048/2896/351/3956/66008/2022/4854/152007/56975/4831/6422/54795/677/1513/54681/65009/10272/10398/5054/80349/7057/652/55558/81618/4015/567/28988/2201/6648/6272/8463/91663/51393/3675/8654/81029/857/…
GO:0030522	intracellular receptor signaling pathway	18	56	0.321429	0.283163	1.75227	0.0060423	0.0171236	338	tags=32%, list=13%, signal=29%	10370/2171/4929/55252/6294/23411/2033/9698/7337/9667/23369/1399/708/8289/5245/196/2908/8805
GO:0065009	regulation of molecular function	150	468	0.320513	-0.206329	-1.6191	0.00217628	0.0137074	637	tags=32%, list=25%, signal=29%	57555/5092/831/4043/149951/285381/64400/64780/94274/481/9459/51306/975/10063/7076/2535/9064/2934/146198/8853/6604/3280/6867/3315/5217/5997/7016/6494/5176/9236/81/8543/847/9961/23576/10507/3611/9181/23654/53827/6695/6281/83464/23568/55803/64065/308/113791/26585/284/595/25994/57515/8323/3306/4921/4739/2629/56925/1508/5720/114757/858/3065/784/5660/301/7048/2896/5064/378/351/51232/115704/334/5329/425…
GO:0001501	skeletal system development	31	97	0.319588	-0.353595	-2.1894	0.00136426	0.0102666	369	tags=32%, list=14%, signal=28%	1009/7048/79001/2022/56975/54360/6422/1513/5479/1292/1293/652/3074/53/1291/4015/5307/2201/1294/960/871/81029/7010/1893/7045/338773/1290/1281/1277/10234/1278
GO:0032879	regulation of localization	131	415	0.315663	-0.23326	-1.80536	0.00220507	0.0137074	577	tags=32%, list=22%, signal=29%	3315/5217/5997/7016/5176/81/8543/10507/3611/22846/51768/127435/3488/9181/4681/26022/23654/53827/23433/9510/23568/10490/1012/6335/537/308/26585/8766/7424/3190/284/2037/7414/291/30846/219931/4131/3306/4921/4739/10938/10312/23275/114757/6237/784/55754/301/7048/2896/11188/351/88455/2022/5066/5360/808/152007/7466/8764/3678/60/25932/83700/6422/54795/677/5880/9168/64285/65009/56681/392/5054/27286/5328/1…
GO:0031328	positive regulation of cellular biosynthetic process	119	377	0.31565	0.220626	2.08721	0.010101	0.0247057	535	tags=32%, list=21%, signal=29%	3638/3949/4609/23175/2247/650/2181/55122/10370/10153/8660/23082/1736/10135/6664/2308/55859/26993/4929/1959/1906/55252/5977/64783/23160/6294/467/2296/7555/5609/25926/9586/56919/8664/51322/64216/23411/5743/1051/1649/23367/8325/253461/10155/2648/54971/4783/2033/3725/10987/9935/5324/51282/7337/84128/8812/23185/3516/708/23429/23314/10576/8289/2309/7702/9221/5245/3037/23645/4691/196/51742/6018/94241/90…
GO:0035690	cellular response to drug	23	73	0.315068	0.278303	1.87091	0.00326797	0.0137074	359	tags=32%, list=14%, signal=28%	4609/4314/1545/4830/2308/1906/5471/23411/5743/23367/1399/388/5581/2309/196/94241/57026/1398/10131/2908/25942/4780/5032
GO:0010557	positive regulation of macromolecule biosynthetic process	114	362	0.314917	0.210219	1.97785	0.01	0.0246945	535	tags=31%, list=21%, signal=29%	3638/4609/23175/2247/650/55122/10370/10153/8660/23082/1736/10135/6664/2308/55859/26993/4929/1959/1906/55252/5977/64783/23160/6294/467/2296/7555/5609/25926/9586/56919/8664/51322/64216/23411/1051/1649/23367/8325/253461/10155/2648/54971/4783/2033/3725/10987/9935/5324/51282/7337/84128/8812/23185/3516/708/23429/23314/10576/8289/2309/7702/9221/5245/3037/23645/4691/196/51742/6018/94241/908/84881/10574/7…
GO:0050865	regulation of cell activation	28	89	0.314607	-0.329637	-2.00555	0.00278164	0.0137074	388	tags=31%, list=15%, signal=28%	114757/301/7048/2896/3956/8764/6422/677/5880/1803/961/928/7057/652/2615/8654/857/3553/57045/3575/114897/1075/7292/6347/5159/10875/7070/2621
GO:0009891	positive regulation of biosynthetic process	120	382	0.314136	0.215737	2.04466	0.0107527	0.0257261	535	tags=31%, list=21%, signal=29%	3638/3949/4609/23175/2247/650/2181/55122/10370/10153/8660/23082/1736/10135/6664/2308/55859/26993/4929/1959/1906/55252/5977/64783/23160/6294/467/2296/7555/5609/25926/9586/56919/8664/51322/64216/23411/5743/1051/1649/23367/8325/253461/10155/2648/54971/4783/2033/3725/10987/9935/5324/51282/7337/84128/8812/23185/3516/708/23429/23314/10576/8289/2309/7702/9221/5245/3037/23645/4691/196/51742/6018/94241/90…
GO:0050793	regulation of developmental process	134	427	0.313817	-0.233558	-1.80954	0.00220507	0.0137074	586	tags=31%, list=23%, signal=29%	64332/6604/8742/3280/3315/5997/5176/81/8543/23258/23576/10507/3611/22846/3488/9181/4681/26022/23654/54674/4882/6695/23433/6281/5754/84695/537/147906/26585/8766/7424/133/4627/595/30846/8323/2017/4131/10979/4921/4739/10938/10312/23275/5720/3065/6237/55754/301/7048/2896/5064/351/3956/66008/2022/9204/4854/152007/56975/4831/3678/6422/54795/677/1513/54681/5479/65009/55742/10272/10398/5054/27286/80349/7…
GO:0048878	chemical homeostasis	54	173	0.312139	-0.269475	-1.85342	0.00123305	0.0102666	468	tags=31%, list=18%, signal=27%	537/308/8766/133/8309/523/219931/4502/2629/10938/10312/4489/784/2896/351/57048/3956/6444/79901/55858/808/7466/4831/51310/10577/54795/2167/94103/1535/5731/1634/3074/84286/231/155066/4738/567/6648/51092/4495/5547/4501/7184/2151/857/57333/114897/811/10962/7052/7070/9076/2621/2537
GO:2000026	regulation of multicellular organismal development	105	337	0.311573	-0.231109	-1.75315	0.00221729	0.0137074	586	tags=31%, list=23%, signal=28%	64332/6604/8742/3280/3315/5997/5176/23258/23576/10507/3611/22846/9181/4681/26022/23654/54674/6695/5754/84695/537/147906/26585/8766/7424/133/595/8323/2017/4131/4921/23275/5720/3065/6237/55754/301/7048/2896/351/3956/66008/2022/4854/152007/56975/4831/3678/6422/54795/677/1513/54681/65009/10272/10398/5054/27286/80349/7057/1634/652/115701/55558/81618/4015/567/28988/2201/6648/91663/51393/1284/26471/3675…
GO:0055082	cellular chemical homeostasis	37	119	0.310924	-0.272773	-1.73877	0.00668449	0.0184665	468	tags=31%, list=18%, signal=27%	537/308/133/523/219931/4502/10312/4489/784/2896/351/3956/79901/55858/808/7466/4831/51310/54795/94103/1535/5731/3074/84286/155066/4738/51092/4495/4501/7184/2151/857/114897/811/7052/7070/2621
GO:0009887	animal organ morphogenesis	58	187	0.31016	-0.273592	-1.90009	0.00121655	0.0102666	499	tags=31%, list=19%, signal=27%	1305/780/9510/5754/64065/157506/26585/7424/133/1303/8323/2629/10312/5720/3065/7048/2022/5066/56975/6422/65009/55742/5054/1292/80781/1634/1293/652/115701/59/1291/3912/2201/8463/1294/51466/4638/871/9500/857/57045/3371/3913/7010/7168/1289/3911/338773/1290/6347/5159/1281/7052/7070/1277/115908/72/1278
GO:1903508	positive regulation of nucleic acid-templated transcription	95	307	0.309446	0.211182	1.95233	0.00757576	0.0199155	535	tags=31%, list=21%, signal=28%	3638/4609/23175/2247/650/55122/10370/10153/23082/10135/6664/2308/55859/26993/4929/1959/1906/55252/5977/64783/23160/6294/467/2296/7555/5609/25926/9586/56919/51322/64216/23411/1051/1649/8325/253461/10155/2648/54971/4783/2033/3725/10987/9935/5324/51282/7337/84128/8812/3516/23429/23314/8289/2309/7702/9221/5245/4691/196/51742/6018/94241/7572/902/2908/26205/3096/26574/25942/8805/4780/155061/6299/9984/5…
GO:1902680	positive regulation of RNA biosynthetic process	95	308	0.308442	0.210249	1.9499	0.0075188	0.0198434	535	tags=31%, list=21%, signal=28%	3638/4609/23175/2247/650/55122/10370/10153/23082/10135/6664/2308/55859/26993/4929/1959/1906/55252/5977/64783/23160/6294/467/2296/7555/5609/25926/9586/56919/51322/64216/23411/1051/1649/8325/253461/10155/2648/54971/4783/2033/3725/10987/9935/5324/51282/7337/84128/8812/3516/23429/23314/8289/2309/7702/9221/5245/4691/196/51742/6018/94241/7572/902/2908/26205/3096/26574/25942/8805/4780/155061/6299/9984/5…
GO:0043491	protein kinase B signaling	16	52	0.307692	-0.337639	-1.78786	0.0089955	0.0228005	283	tags=31%, list=11%, signal=28%	6237/2022/677/5880/6199/7057/4015/3688/3553/57333/114897/7010/2152/6347/5159/2621
GO:0061061	muscle structure development	41	134	0.30597	-0.280075	-1.84528	0.00256082	0.0137074	456	tags=31%, list=18%, signal=27%	26585/133/4627/30846/10938/858/7048/3956/6444/2022/26509/8910/677/10791/341405/928/1465/71/1634/1293/652/115701/4015/5307/6648/6272/26471/4638/1410/857/3688/811/4000/7168/3911/9124/338773/5159/2353/1281/6876
GO:0045935	positive regulation of nucleobase-containing compound metabolic process	111	365	0.30411	0.201665	1.88148	0.0103093	0.025135	535	tags=30%, list=21%, signal=28%	3638/4609/23175/2247/650/5514/55122/10370/10153/23082/1736/10135/6664/2308/55859/26993/4929/2070/1959/1906/55252/5977/64783/23160/6294/467/2296/7555/5609/25926/9586/56919/51322/64216/23411/1051/1649/8325/253461/10155/2648/54971/4783/2033/3725/10987/9935/5324/9698/51282/7337/84128/1859/5430/8812/3516/23429/23314/10576/8289/2309/7702/9221/5245/4691/196/51742/6018/94241/908/10574/7572/902/2908/26205…
GO:0002694	regulation of leukocyte activation	24	80	0.3	-0.314793	-1.86286	0.00691563	0.0187656	370	tags=30%, list=14%, signal=27%	301/7048/2896/3956/8764/6422/677/5880/1803/961/7057/652/2615/8654/857/3553/57045/3575/1075/7292/6347/10875/7070/2621
GO:0072358	cardiovascular system development	46	155	0.296774	-0.30834	-2.09613	0.00125471	0.0102666	382	tags=30%, list=15%, signal=27%	6237/301/7048/2896/64359/6444/2022/4854/3678/25932/83700/6422/677/55742/5054/27286/80781/7057/1634/652/59/4015/6648/8463/5547/1284/1464/4638/857/3688/3553/4240/7010/1289/3911/1893/2152/7045/6347/1282/8434/5159/1281/7070/1277/1278
GO:0007166	cell surface receptor signaling pathway	140	472	0.29661	-0.262366	-2.05738	0.00109649	0.0102666	522	tags=30%, list=20%, signal=29%	3488/9181/4681/23654/4882/23433/10552/780/83464/9510/5754/84695/1012/3682/537/64065/147906/26585/10093/7424/284/4627/595/523/8323/4502/2017/10979/4921/4739/10312/79094/5720/858/3065/784/301/10379/6624/7837/7048/378/351/3693/64359/8406/51232/2022/5329/4854/26509/3672/10096/56975/8764/4831/3678/60/7094/6422/54795/1307/11167/5034/64285/65009/10272/5054/123920/3588/961/30851/80349/10581/1535/7057/71/…
GO:0007178	transmembrane receptor protein serine/threonine kinase signaling pathway	21	71	0.295775	-0.303336	-1.75031	0.0157593	0.0355975	409	tags=30%, list=16%, signal=26%	10979/858/7048/3693/2022/6422/11167/10272/7057/652/4015/2615/2201/3675/857/57045/27122/4053/2353/1281/1278
GO:0051249	regulation of lymphocyte activation	21	71	0.295775	-0.328407	-1.89497	0.00429799	0.0147977	370	tags=30%, list=14%, signal=26%	301/7048/3956/8764/6422/677/5880/1803/961/652/2615/8654/857/3553/57045/3575/7292/6347/10875/7070/2621
GO:0002376	immune system process	145	496	0.292339	-0.272974	-2.15152	0.0010929	0.0102666	480	tags=29%, list=19%, signal=29%	84695/7126/1397/9588/537/2720/26585/10093/2217/203068/7424/200316/284/91607/715/3920/7414/6396/4627/4502/9554/9123/10312/1508/5720/8907/3065/6237/784/162/5660/55754/301/10379/7837/7048/2799/2896/8566/351/3693/3956/9871/58485/5329/1727/3672/10096/56975/8764/4831/3678/9644/60/5236/83700/6422/10577/8836/54795/5476/677/1513/54681/5627/5880/10133/29952/10272/10398/5054/123920/94103/3588/5328/1803/961/…
GO:0001944	vasculature development	45	154	0.292208	-0.304576	-2.0646	0.00126743	0.0102666	382	tags=29%, list=15%, signal=26%	6237/301/7048/2896/6444/2022/4854/3678/25932/83700/6422/677/55742/5054/27286/80781/7057/1634/652/59/4015/6648/8463/5547/1284/1464/4638/857/3688/3553/4240/7010/1289/3911/1893/2152/7045/6347/1282/8434/5159/1281/7070/1277/1278
GO:0051128	regulation of cellular component organization	123	426	0.288732	-0.191644	-1.48618	0.00550055	0.0169942	578	tags=29%, list=22%, signal=27%	11034/5217/5997/7016/6494/5176/81/8543/9873/23258/4582/10507/3611/3488/9181/23654/54674/6695/23433/10552/780/6281/5754/26277/25940/1012/147906/26585/10093/8766/203068/3190/284/4627/30846/25994/2017/4131/3306/10979/4921/4739/2629/9554/10938/858/55754/301/6624/2896/5064/378/351/3956/88455/66008/5066/115704/5329/9204/808/10096/4831/25932/55616/83700/6422/1307/5880/9168/10133/65009/55742/56681/5054/2…
GO:0050877	nervous system process	30	105	0.285714	-0.273955	-1.70957	0.00964187	0.0240526	406	tags=29%, list=16%, signal=25%	2629/56925/784/5660/285440/378/351/7466/3678/83700/7991/65009/80781/3074/51308/567/8506/6907/6648/51393/3675/23385/3688/4130/3913/1075/7045/6347/2353/1277
GO:0010628	positive regulation of gene expression	105	375	0.28	0.201471	1.90462	0.010101	0.0247057	469	tags=28%, list=18%, signal=27%	3638/3949/4609/23175/2247/10253/650/9188/55122/10370/10153/7014/23082/10135/6664/2308/55859/26993/4929/1959/1906/55252/5977/64783/23160/6294/467/2296/7555/5609/25926/9586/56919/8664/51322/64216/23411/1051/1649/23367/8325/253461/10155/2648/54971/4783/2033/3725/10987/9935/5324/7337/9533/84128/1859/5430/8812/23185/3516/708/23429/23314/8289/2309/7702/9221/5245/23645/4691/196/51742/6018/94241/84881/75…
GO:0071363	cellular response to growth factor stimulus	41	148	0.277027	-0.276798	-1.86786	0.00379747	0.0140214	418	tags=28%, list=16%, signal=25%	4131/10979/10938/858/301/7048/351/3693/2022/26509/56975/3678/6422/677/11167/10272/7057/1634/652/967/4015/2615/2201/6272/4495/1284/960/3675/857/3553/57045/27122/6347/4053/5159/2353/1281/9076/2621/1277/1278
GO:0051254	positive regulation of RNA metabolic process	91	329	0.276596	0.202774	1.88503	0.00892857	0.0227058	469	tags=28%, list=18%, signal=26%	3638/4609/23175/2247/650/55122/10370/10153/23082/10135/6664/2308/55859/26993/4929/1959/1906/55252/5977/64783/23160/6294/467/2296/7555/5609/25926/9586/56919/51322/64216/23411/1051/1649/8325/253461/10155/2648/54971/4783/2033/3725/10987/9935/5324/9698/51282/7337/84128/1859/5430/8812/3516/23429/23314/8289/2309/7702/9221/5245/4691/196/51742/6018/94241/7572/902/2908/26205/3096/26574/25942/8805/4780/155…
GO:0030111	regulation of Wnt signaling pathway	21	76	0.276316	-0.271681	-1.57797	0.0227596	0.0476277	485	tags=28%, list=19%, signal=23%	5754/147906/26585/8323/5720/3065/351/64359/6422/54795/30851/115701/6907/3675/81029/857/27122/8434/3489/1277/115908
GO:0043410	positive regulation of MAPK cascade	21	76	0.276316	-0.274807	-1.59613	0.0213371	0.045019	386	tags=28%, list=15%, signal=24%	858/5660/351/152007/3672/65009/7057/652/28988/5871/1464/960/9500/8654/3553/8682/114897/7010/6347/5159/2621
GO:0009725	response to hormone	49	179	0.273743	-0.237235	-1.63441	0.00862069	0.0221428	468	tags=27%, list=18%, signal=24%	537/2720/308/133/595/523/4131/2629/10312/1508/858/3065/6638/301/7048/2022/5066/808/7035/4831/6422/8836/677/6513/1535/7057/652/231/155066/4015/2354/6272/5547/896/3675/1410/857/3553/3371/811/6773/7010/7292/5159/2353/3490/9076/81606/1277
GO:0030855	epithelial cell differentiation	29	106	0.273585	-0.264194	-1.65051	0.0165062	0.0370665	391	tags=27%, list=15%, signal=24%	1508/3065/5660/54507/301/2022/56975/4831/25932/677/1513/5054/80781/652/1266/59/230/51092/91663/23022/81029/857/3553/3913/3911/1282/9076/6876/81606
GO:0009605	response to external stimulus	98	359	0.272981	-0.246149	-1.8844	0.00220264	0.0137074	463	tags=27%, list=18%, signal=26%	308/23710/26585/7424/133/200316/284/91607/715/3920/595/25994/4502/4131/2629/56925/8907/784/301/10379/7048/2896/351/57048/79001/2022/5329/4258/3672/8764/7035/83700/6422/10577/54795/11167/5627/5880/10133/84557/2167/55742/5054/123920/3588/5328/961/928/6513/10581/1535/7057/5731/1634/652/967/55558/59/10417/4015/2354/567/26471/23022/51466/7184/1611/23643/4925/857/9636/968/3553/2/3371/114897/811/3913/12…
GO:0071345	cellular response to cytokine stimulus	55	203	0.270936	-0.262342	-1.84903	0.00120192	0.0102666	450	tags=27%, list=17%, signal=24%	7424/284/595/4502/5372/2629/10312/5720/301/10379/6624/7837/10096/8764/7035/6422/677/5034/2167/3588/961/10581/1535/7057/71/4015/10376/567/6648/4501/960/51466/7184/3590/857/9636/3688/3553/3575/1265/6773/5118/3911/1893/2152/7292/6347/2353/4599/9076/2621/1277/8519/2537/1278
GO:0009617	response to bacterium	23	85	0.270588	-0.284291	-1.71009	0.00973574	0.0241195	360	tags=27%, list=14%, signal=24%	2896/57048/4258/8764/7035/10133/2167/5054/961/1535/5731/1634/10417/567/23643/857/9636/968/3553/7292/6347/2353/9076
GO:0045893	positive regulation of transcription, DNA-templated	77	285	0.270175	0.227394	2.0828	0.0075188	0.0198434	413	tags=27%, list=16%, signal=26%	3638/4609/23175/2247/650/55122/10370/10153/23082/10135/6664/2308/55859/26993/4929/1959/1906/55252/5977/64783/23160/6294/467/2296/7555/5609/25926/9586/56919/51322/64216/23411/1051/1649/8325/253461/10155/2648/54971/4783/2033/3725/10987/9935/5324/7337/84128/8812/3516/23429/23314/8289/2309/7702/9221/5245/4691/196/51742/6018/94241/7572/902/2908/3096/26574/25942/8805/4780/155061/6299/9984/5901/6926/550…
GO:0046649	lymphocyte activation	27	100	0.27	-0.295471	-1.82329	0.00414365	0.0147198	370	tags=27%, list=14%, signal=24%	301/7048/3956/8764/6422/677/5880/1803/961/652/567/1650/2615/960/896/23385/8654/857/3688/3553/57045/3575/7292/6347/10875/7070/2621
GO:0098542	defense response to other organism	17	63	0.269841	-0.326177	-1.82604	0.00588235	0.0169942	366	tags=27%, list=14%, signal=24%	10379/2896/8764/10133/5054/3588/10581/1535/10417/9636/3553/6773/7292/4599/10875/8519/2537
GO:0070848	response to growth factor	42	156	0.269231	-0.264422	-1.7961	0.00376884	0.013983	418	tags=27%, list=16%, signal=24%	4131/10979/10938/858/301/7048/351/3693/2022/26509/56975/3678/6422/677/11167/10272/7057/1634/652/967/4015/2615/2201/6272/4495/1284/960/3675/857/3553/57045/3371/27122/6347/4053/5159/2353/1281/9076/2621/1277/1278
GO:0042493	response to drug	46	171	0.269006	-0.235356	-1.62272	0.014742	0.0339996	455	tags=27%, list=18%, signal=24%	284439/7424/595/291/4502/4131/2629/114757/5660/55754/301/7048/3956/2022/5066/808/6185/60/6422/8836/54795/3047/84557/1535/80781/7057/4015/2354/567/4837/3048/7184/3675/1410/857/3553/8682/3371/811/4924/5159/2353/3490/9076/2621/1277
GO:0019216	regulation of lipid metabolic process	19	71	0.267606	0.388393	2.58655	0.00328947	0.0137074	149	tags=27%, list=6%, signal=26%	3638/3949/6319/3992/2194/2247/650/2181/6713/2222/79602/8660/2171/3157/5166/23411/219743/31/5743
GO:0006631	fatty acid metabolic process	16	60	0.266667	0.411938	2.60492	0.00311526	0.0137074	149	tags=27%, list=6%, signal=26%	3638/6319/3992/23175/2194/2181/1545/79602/8660/2171/1906/5166/23411/219743/31/5743
GO:0042592	homeostatic process	82	308	0.266234	-0.21308	-1.59613	0.00690449	0.0187656	474	tags=27%, list=18%, signal=25%	9588/537/308/8766/133/3920/8309/523/219931/4502/79770/2629/10938/10312/4489/784/301/2896/351/64359/57048/3956/6444/79901/55858/808/7466/54360/4831/60/51310/83700/10577/54795/677/1513/54681/5880/10130/5034/2167/10954/94103/1535/5731/71/1634/728378/652/3074/84286/231/155066/4738/4015/567/6648/51092/4495/5547/51393/4501/7184/2151/23385/51750/857/9636/3553/4130/57333/3575/114897/811/10962/338773/6347…
GO:0009628	response to abiotic stimulus	58	220	0.263636	-0.243889	-1.73301	0.00361011	0.0137074	450	tags=26%, list=17%, signal=24%	7424/133/121457/6396/595/25994/523/4131/3306/2629/56925/5720/114757/784/301/7048/5064/351/2022/5066/5352/26509/6422/677/5034/65009/5328/1803/928/6513/1535/80781/7057/1634/231/2354/51393/7184/4638/1410/857/3688/3553/3371/1265/4000/7010/5935/9124/4239/5351/5159/2353/3490/1281/9076/5327/1277
GO:0034097	response to cytokine	58	220	0.263636	-0.25498	-1.81183	0.00120337	0.0102666	450	tags=26%, list=17%, signal=24%	7424/284/595/4502/5372/2629/10312/5720/301/10379/6624/7837/351/10096/8764/7035/6422/677/5034/2167/3588/961/10581/1535/7057/71/4015/10376/567/1650/6648/4501/960/51466/7184/3590/857/9636/3688/3553/3575/1265/6773/5118/3911/1893/2152/7292/6347/2353/4599/1281/9076/2621/1277/8519/2537/1278
GO:0030162	regulation of proteolysis	38	146	0.260274	-0.271238	-1.82407	0.00505689	0.0161412	406	tags=26%, list=16%, signal=23%	2629/79094/56925/160418/5720/3065/2896/351/51232/334/5329/7035/5627/64285/5054/7057/1293/4738/1294/26471/960/1611/871/1410/857/3553/2/4130/57333/5118/1893/1075/2152/2192/8434/2621/5327/2537
GO:0071407	cellular response to organic cyclic compound	28	108	0.259259	0.215469	1.60449	0.00746269	0.0198434	359	tags=26%, list=14%, signal=23%	3638/650/81035/1545/2308/3157/4929/25976/8480/1906/5144/6294/23411/5743/1051/23367/2033/7337/9667/8289/2309/5245/196/57026/2908/25942/8805/5032
GO:0042180	cellular ketone metabolic process	15	58	0.258621	0.293964	1.82332	0.00309598	0.0137074	278	tags=26%, list=11%, signal=24%	3638/650/79602/8660/8942/2171/4953/5166/23411/219743/5743/7167/84274/5581/5695
GO:0048585	negative regulation of response to stimulus	80	311	0.257235	-0.226889	-1.70417	0.00229095	0.0137074	464	tags=26%, list=18%, signal=24%	147906/308/113791/26585/133/284/25994/8323/2017/2629/79094/5720/858/3065/784/5660/301/7837/7048/2896/5064/64359/115265/5329/808/4854/3672/7466/8764/7035/6422/5627/10133/65009/10272/5054/5328/961/30851/928/7057/1634/652/115701/55558/2201/6648/91663/960/3675/23643/50861/51750/81029/4925/857/3688/3553/57045/2/8682/3575/114897/811/4000/27122/7010/1893/2192/7292/6347/1281/3489/10875/7070/2621/81606/53…
GO:0002682	regulation of immune system process	65	253	0.256917	-0.269259	-1.95695	0.00117647	0.0102666	391	tags=26%, list=15%, signal=24%	1508/5720/3065/784/301/7048/2896/351/3956/10096/8764/4831/60/83700/6422/54795/677/1513/54681/5627/5880/10272/10398/5054/123920/1803/961/80349/928/1535/7057/71/10092/652/10417/83692/4015/567/2615/4267/7184/23643/8654/857/9636/3688/968/3553/57045/2/3575/811/1893/1075/7292/6347/2353/1281/10875/7070/2621/1277/8519/10234/1278
GO:1901566	organonitrogen compound biosynthetic process	96	377	0.254642	0.169901	1.60733	0.010101	0.0247057	462	tags=25%, list=18%, signal=24%	6319/23175/2194/2181/6159/6229/4830/8942/6183/10135/6128/8890/10884/2171/4929/6173/4953/8480/7965/25983/1537/7555/5166/60488/5471/56919/8664/5036/31/5743/1051/51116/23367/1973/54460/9521/10987/22822/79590/23165/10606/54148/26589/9698/7167/23369/23185/54517/7371/10209/708/84541/81929/2309/10240/9221/4507/4528/3037/1975/23645/4691/262/26284/84881/55326/10400/10131/2107/54938/26574/51187/8872/119391…
GO:0009719	response to endogenous stimulus	78	307	0.254072	-0.214999	-1.6089	0.00574713	0.0169942	468	tags=25%, list=18%, signal=24%	537/2720/308/26585/133/595/523/4131/10979/2629/10938/10312/1508/858/3065/6638/301/7048/351/3693/2022/5066/808/56975/7035/4831/60/6422/8836/54795/1307/677/11167/10272/928/6513/1535/7057/652/231/7390/155066/1291/4015/2354/2615/2201/6272/5547/1284/960/7184/896/3675/1410/857/3688/968/3553/57045/3371/811/6773/27122/7010/1290/7292/6347/4053/1282/5159/2353/3490/1281/9076/81606/1277/1278
GO:0006952	defense response	62	245	0.253061	-0.234659	-1.69584	0.00236967	0.0137074	451	tags=25%, list=17%, signal=23%	203068/133/200316/91607/715/4502/2629/10312/56925/1508/5720/301/10379/2896/351/4258/10096/8764/83700/1513/5627/10133/2167/5054/3588/1803/961/10581/1535/7057/5731/71/10417/567/5547/5871/26471/960/51466/7184/23643/3959/857/9636/3688/968/3553/2/6773/7010/1893/1075/2152/7292/6347/2353/4599/7052/10875/9076/8519/2537
GO:0002683	negative regulation of immune system process	22	87	0.252874	-0.294623	-1.78007	0.00696379	0.0187656	306	tags=25%, list=12%, signal=23%	8764/4831/6422/677/10272/961/80349/7057/652/2615/23643/8654/968/57045/2/3575/7292/6347/1281/10875/7070/10234
GO:0071310	cellular response to organic substance	119	489	0.243354	-0.228961	-1.79992	0.00110375	0.0102666	427	tags=24%, list=17%, signal=25%	523/4502/5372/4131/3306/10979/2629/10938/10312/1508/5720/858/3065/55033/5660/301/10379/6624/7837/7048/351/3693/57048/3956/2022/26509/7466/10096/56975/8764/7035/4831/3678/60/7094/6422/54795/1307/677/11167/23753/10133/10130/5034/2167/10272/5054/10954/3588/961/10581/1535/7057/71/1634/652/967/231/7390/155066/1291/10417/4015/10376/2354/567/2615/2201/6648/6272/8463/51092/4495/5547/4501/1284/960/51466/7…
GO:0002684	positive regulation of immune system process	40	166	0.240964	-0.22967	-1.57772	0.0221948	0.0465727	391	tags=24%, list=15%, signal=22%	1508/5720/784/301/7048/351/3956/10096/8764/60/677/1513/5627/5880/5054/123920/1803/961/1535/7057/71/10092/10417/83692/567/4267/7184/23643/857/9636/3553/2/3575/811/1075/7292/6347/2353/7070/2621
GO:0006732	coenzyme metabolic process	20	84	0.238095	0.232447	1.60289	0.0175439	0.0390542	350	tags=24%, list=14%, signal=21%	6319/2194/2181/8942/10135/3157/8480/5166/31/5743/23165/7167/81929/84274/262/7086/57026/10400/29914/119391
GO:0033993	response to lipid	39	164	0.237805	-0.230742	-1.58502	0.0221948	0.0465727	385	tags=24%, list=15%, signal=22%	3065/301/7048/57048/2022/5066/4258/808/7035/4831/6422/677/5054/1535/7057/5731/1634/652/10417/4015/2354/8463/23643/1410/81029/857/968/3553/3371/811/3294/7292/6347/5159/2353/3490/9076/81606/1277
GO:0051093	negative regulation of developmental process	42	177	0.237288	-0.239177	-1.65334	0.00858896	0.0221353	370	tags=24%, list=14%, signal=22%	301/7048/351/3956/66008/4854/4831/6422/54795/677/1513/10272/5054/80349/7057/1634/652/115701/55558/81618/567/6272/1284/857/3688/3553/57045/811/7010/1289/1893/1075/338773/1290/2192/7292/1281/10875/7070/2621/81606/10234
GO:0008202	steroid metabolic process	13	55	0.236364	0.372512	2.3037	0.00302115	0.0137074	147	tags=24%, list=6%, signal=23%	3638/3949/6319/2194/650/6713/1545/2222/3157/25976/7555/23411/31
GO:0050776	regulation of immune response	36	154	0.233766	-0.26273	-1.78094	0.00506971	0.0161412	391	tags=23%, list=15%, signal=21%	1508/5720/784/301/2896/10096/8764/60/54795/1513/5627/5880/123920/961/1535/71/10092/10417/567/4267/7184/23643/857/3688/3553/2/3575/1893/7292/2353/1281/10875/7070/1277/8519/1278
GO:0044283	small molecule biosynthetic process	37	159	0.232704	0.252034	2.05625	0.00512821	0.0161412	308	tags=23%, list=12%, signal=22%	3638/6319/3992/2194/2247/650/2181/6713/2222/79602/4830/8942/2308/2171/3157/8480/1906/5144/467/7555/5166/23411/31/5743/2648/2033/23165/7167/7371/81929/84274/10296/4507/3037/262/7086/5771
GO:0072330	monocarboxylic acid biosynthetic process	15	65	0.230769	0.321169	2.07916	0.00318471	0.0137074	210	tags=23%, list=8%, signal=22%	3638/6319/3992/2194/2181/79602/2171/8480/1906/5166/23411/31/5743/23165/7167
GO:0009260	ribonucleotide biosynthetic process	14	61	0.229508	0.28486	1.80443	0.00309598	0.0137074	252	tags=23%, list=10%, signal=21%	6319/2194/2181/4830/8480/1537/5166/5471/31/23165/10606/7167/7371/81929
GO:0043207	response to external biotic stimulus	33	145	0.227586	-0.254739	-1.70933	0.00762389	0.0199155	366	tags=23%, list=14%, signal=21%	10379/2896/57048/4258/8764/7035/10577/10133/2167/5054/3588/961/10581/1535/5731/1634/59/10417/567/23643/857/9636/968/3553/6773/7292/6347/2353/4599/10875/9076/8519/2537
GO:0051707	response to other organism	33	145	0.227586	-0.254739	-1.70933	0.00762389	0.0199155	366	tags=23%, list=14%, signal=21%	10379/2896/57048/4258/8764/7035/10577/10133/2167/5054/3588/961/10581/1535/5731/1634/59/10417/567/23643/857/9636/968/3553/6773/7292/6347/2353/4599/10875/9076/8519/2537
GO:0009607	response to biotic stimulus	34	150	0.226667	-0.250741	-1.69039	0.00889454	0.0226944	366	tags=23%, list=14%, signal=21%	10379/2896/57048/4258/7466/8764/7035/10577/10133/2167/5054/3588/961/10581/1535/5731/1634/59/10417/567/23643/857/9636/968/3553/6773/7292/6347/2353/4599/10875/9076/8519/2537
GO:1901700	response to oxygen-containing compound	63	278	0.226619	-0.23182	-1.70943	0.00346021	0.0137074	373	tags=23%, list=14%, signal=22%	5660/301/7048/351/57048/3956/5066/4258/808/7035/4831/60/6422/8836/54795/1307/677/84557/5054/1292/928/6513/1535/80781/7057/5731/1634/231/155066/1291/10417/2354/6648/6272/8463/51092/7184/896/23643/1410/81029/857/968/3553/3371/811/6773/3294/7010/7168/1290/7292/6347/10516/1282/5159/2353/3490/1281/9076/2621/1277/1278
GO:0072522	purine-containing compound biosynthetic process	15	67	0.223881	0.259762	1.69891	0.00657895	0.0182405	292	tags=22%, list=11%, signal=20%	6319/2194/2181/4830/8480/1537/5166/5471/31/23165/10606/7167/81929/4507/262
GO:0016053	organic acid biosynthetic process	19	85	0.223529	0.264099	1.82406	0.00353357	0.0137074	279	tags=22%, list=11%, signal=21%	3638/6319/3992/2194/2181/79602/8942/2171/8480/1906/5166/23411/31/5743/23165/7167/81929/4507/3037
GO:0046394	carboxylic acid biosynthetic process	19	85	0.223529	0.264099	1.82406	0.00353357	0.0137074	279	tags=22%, list=11%, signal=21%	3638/6319/3992/2194/2181/79602/8942/2171/8480/1906/5166/23411/31/5743/23165/7167/81929/4507/3037
GO:0071495	cellular response to endogenous stimulus	59	264	0.223485	-0.207319	-1.51115	0.0105758	0.0255415	427	tags=22%, list=17%, signal=21%	523/4131/10979/10938/10312/1508/858/3065/301/7048/351/3693/2022/56975/7035/60/6422/54795/1307/677/11167/10272/1535/7057/652/231/7390/155066/1291/4015/2354/2615/2201/6272/5547/1284/960/7184/896/3675/857/3553/57045/3371/811/27122/1290/7292/6347/4053/1282/5159/2353/3490/1281/9076/81606/1277/1278
GO:0009108	coenzyme biosynthetic process	13	59	0.220339	0.275902	1.73469	0.00619195	0.0174191	256	tags=22%, list=10%, signal=20%	6319/2194/2181/8942/10135/8480/5166/31/5743/23165/7167/81929/84274
GO:0046390	ribose phosphate biosynthetic process	14	64	0.21875	0.273114	1.74452	0.00322581	0.0137074	252	tags=22%, list=10%, signal=20%	6319/2194/2181/4830/8480/1537/5166/5471/31/23165/10606/7167/7371/81929
GO:0009165	nucleotide biosynthetic process	17	78	0.217949	0.265426	1.81456	0.00350877	0.0137074	252	tags=22%, list=10%, signal=20%	6319/2194/2181/4830/8942/10135/8480/1537/5166/5471/31/5743/23165/10606/7167/7371/81929
GO:1901293	nucleoside phosphate biosynthetic process	17	78	0.217949	0.265426	1.81456	0.00350877	0.0137074	252	tags=22%, list=10%, signal=20%	6319/2194/2181/4830/8942/10135/8480/1537/5166/5471/31/5743/23165/10606/7167/7371/81929
GO:0009152	purine ribonucleotide biosynthetic process	13	60	0.216667	0.272709	1.7245	0.00934579	0.0234561	252	tags=22%, list=10%, signal=20%	6319/2194/2181/4830/8480/1537/5166/5471/31/23165/10606/7167/81929
GO:0048584	positive regulation of response to stimulus	84	388	0.216495	-0.208597	-1.60536	0.00328947	0.0137074	391	tags=22%, list=15%, signal=22%	1508/29995/5720/858/784/5660/301/7048/2896/351/3956/8406/2022/5329/4258/808/152007/3672/10096/8764/3678/60/6422/54795/1513/5627/5880/10133/65009/2167/392/5054/123920/3588/961/1535/7057/71/1634/10092/652/967/231/10417/81618/567/28988/8506/6907/5871/26471/1464/960/7184/23643/4638/9500/2151/8654/857/57153/3688/3553/57045/2/8682/3575/114897/811/7010/10962/1893/1075/2152/7292/6347/1123/8434/5159/1281/…
GO:0009967	positive regulation of signal transduction	61	289	0.211073	-0.213435	-1.58286	0.00575374	0.0169942	390	tags=21%, list=15%, signal=20%	29995/5720/858/784/5660/351/3956/8406/2022/5329/808/152007/3672/3678/6422/54795/5880/65009/392/123920/3588/1535/7057/1634/652/967/231/81618/28988/8506/6907/5871/26471/1464/960/23643/9500/2151/8654/857/57153/3688/3553/57045/8682/3575/114897/811/7010/10962/1893/1075/2152/6347/1123/8434/5159/1281/7052/2621/1277
GO:0010647	positive regulation of cell communication	63	302	0.208609	-0.211316	-1.57644	0.00691244	0.0187656	390	tags=21%, list=15%, signal=20%	29995/5720/858/784/5660/351/3956/8406/2022/5329/808/152007/3672/3678/6422/54795/5880/65009/392/123920/3588/1535/7057/1634/652/967/231/81618/28988/8506/6907/5871/26471/1464/960/22883/23643/9500/2151/23385/8654/857/57153/3688/3553/57045/8682/3575/114897/811/7010/10962/1893/1075/2152/6347/1123/8434/5159/1281/7052/2621/1277
GO:0023056	positive regulation of signaling	63	304	0.207237	-0.209965	-1.56933	0.00574053	0.0169942	390	tags=21%, list=15%, signal=20%	29995/5720/858/784/5660/351/3956/8406/2022/5329/808/152007/3672/3678/6422/54795/5880/65009/392/123920/3588/1535/7057/1634/652/967/231/81618/28988/8506/6907/5871/26471/1464/960/22883/23643/9500/2151/23385/8654/857/57153/3688/3553/57045/8682/3575/114897/811/7010/10962/1893/1075/2152/6347/1123/8434/5159/1281/7052/2621/1277
GO:0090407	organophosphate biosynthetic process	26	127	0.204724	0.229928	1.78838	0.004329	0.0147977	319	tags=20%, list=12%, signal=19%	6319/3992/23175/2194/2247/2181/4830/8942/10135/2171/3157/8480/1537/5166/5471/31/5743/23165/10606/7167/7371/81929/9489/7086/55326/10400
GO:0006164	purine nucleotide biosynthetic process	13	64	0.203125	0.257142	1.64251	0.00967742	0.0240526	252	tags=20%, list=10%, signal=19%	6319/2194/2181/4830/8480/1537/5166/5471/31/23165/10606/7167/81929
GO:0006066	alcohol metabolic process	12	60	0.2	0.359004	2.27019	0.00311526	0.0137074	147	tags=20%, list=6%, signal=19%	3638/3949/6319/2194/2247/650/6713/1545/2222/3157/7555/31
GO:0001654	eye development	11	55	0.2	-0.318778	-1.71711	0.0178838	0.0391303	202	tags=20%, list=8%, signal=19%	652/2201/1410/81029/57045/3913/1289/1290/1282/5159/7070
GO:0048880	sensory system development	11	55	0.2	-0.318778	-1.71711	0.0178838	0.0391303	202	tags=20%, list=8%, signal=19%	652/2201/1410/81029/57045/3913/1289/1290/1282/5159/7070
GO:0150063	visual system development	11	55	0.2	-0.318778	-1.71711	0.0178838	0.0391303	202	tags=20%, list=8%, signal=19%	652/2201/1410/81029/57045/3913/1289/1290/1282/5159/7070
GO:0080135	regulation of cellular response to stress	27	136	0.198529	0.235767	1.8435	0.00462963	0.015392	205	tags=20%, list=8%, signal=19%	3638/4609/4314/650/5514/8870/7014/10135/2308/2070/8480/1906/26156/5609/55432/23411/5743/604/1649/8325/10155/2033/9521/23049/10987/23165/1859
GO:0009615	response to virus	12	64	0.1875	-0.301191	-1.69532	0.0202312	0.0432801	231	tags=19%, list=9%, signal=18%	3588/10581/59/10417/9636/3553/6773/7292/4599/10875/8519/2537
GO:1901701	cellular response to oxygen-containing compound	37	202	0.183168	-0.212704	-1.49571	0.0204573	0.0436422	304	tags=18%, list=12%, signal=18%	7035/4831/60/6422/54795/1307/677/84557/5054/1535/231/155066/1291/10417/6648/8463/51092/7184/896/23643/81029/857/968/3553/3371/7168/1290/7292/6347/10516/1282/2353/1281/9076/2621/1277/1278
GO:0009259	ribonucleotide metabolic process	19	105	0.180952	0.206154	1.52699	0.0181159	0.0395257	254	tags=18%, list=10%, signal=17%	6319/2194/2181/4830/8942/3157/8480/5144/5744/1537/5166/5471/31/23165/10606/7167/7371/81929/7386
GO:0019637	organophosphate metabolic process	35	195	0.179487	0.184717	1.5748	0.0169492	0.0379503	322	tags=18%, list=12%, signal=17%	3949/6319/3992/23175/2194/2247/2181/2222/4830/8942/10135/2171/3157/8480/5144/5744/1537/5166/5471/31/5743/23049/23165/10606/7167/7371/81929/7386/9489/7086/57026/4728/55326/10400/526
GO:0008610	lipid biosynthetic process	20	114	0.175439	0.296338	2.24742	0.00387597	0.0142301	149	tags=18%, list=6%, signal=17%	3638/3949/6319/3992/23175/2194/2247/650/2181/6713/2222/79602/2171/3157/1906/7555/5166/23411/31/5743
GO:1901615	organic hydroxy compound metabolic process	14	81	0.17284	0.305627	2.1003	0.00350877	0.0137074	147	tags=17%, list=6%, signal=17%	3638/3949/6319/2194/2247/650/6713/1545/2222/3157/4929/7555/23411/31
GO:0019221	cytokine-mediated signaling pathway	23	135	0.17037	-0.282679	-1.86525	0.00255754	0.0137074	171	tags=17%, list=7%, signal=17%	567/6648/960/7184/3590/857/9636/3688/3553/3575/1265/6773/3911/1893/2152/7292/6347/2353/4599/2621/8519/2537/1278
GO:0032787	monocarboxylic acid metabolic process	18	108	0.166667	0.264084	1.96651	0.00373134	0.013911	149	tags=17%, list=6%, signal=16%	3638/6319/3992/23175/2194/2181/1545/79602/8660/8942/2171/8480/1906/5166/23411/219743/31/5743
GO:0044255	cellular lipid metabolic process	20	152	0.131579	0.220875	1.8111	0.00930233	0.0234236	149	tags=13%, list=6%, signal=13%	3638/3949/6319/3992/23175/2194/2247/2181/1545/2222/79602/8660/2171/3157/1906/5166/23411/219743/31/5743
GO:0006644	phospholipid metabolic process	8	63	0.126984	0.265282	1.68692	0.00310559	0.0137074	66	tags=13%, list=3%, signal=13%	3949/3992/23175/2247/2181/2222/2171/3157
GO:0006629	lipid metabolic process	24	203	0.118227	0.185217	1.59415	0.0176471	0.039115	149	tags=12%, list=6%, signal=12%	3638/3949/6319/3992/23175/2194/2247/650/2181/6713/1545/2222/79602/8660/2171/3157/25976/1906/7555/5166/23411/219743/31/5743
