# Supplementary material for: TP53mutation–associated and copy number–dependent KDM7A-DT expression affects DNA repair and promotes invasive breast cancer progression
Source: Research Square preprint supplement (doi:10.21203/rs.3.rs-1896103/v3), 2022-09-27
Supplement: Supplementary file 6 [file 207ddfc5ff746af232ef9bde.xlsx]

## Sheet: ST10
Table S10. Breast cancer mutation types, TCGA PanCancer DB
Mutation type	Count of Variant_Class	Freq., %
Missense_Mutation	66930	51.2893
Silent	24257	18.5885
Frame_Shift_Del	9266	7.10066
3'UTR	9011	6.90525
Nonsense_Mutation	5632	4.31587
5'UTR	3331	2.55259
Intron	3252	2.49205
RNA	2443	1.8721
Splice_Site	2042	1.56481
Splice_Region	1489	1.14104
Frame_Shift_Ins	943	0.722633
In_Frame_Del	672	0.514962
3'Flank	607	0.465152
5'Flank	385	0.29503
Nonstop_Mutation	95	0.0727997
Translation_Start_Site	89	0.0682018
In_Frame_Ins	51	0.039082
Total	130495	100
