# Supplementary material for: TP53mutation–associated and copy number–dependent KDM7A-DT expression affects DNA repair and promotes invasive breast cancer progression
Source: Research Square preprint supplement (doi:10.21203/rs.3.rs-1896103/v3), 2022-09-27
Supplement: Supplementary file 7 [file 20c7bbe9e3a9a925aa8ca07c.xlsx]

## Sheet: ST17
Table S17. Breast cancer cell lines EMT genes (IPA Data base )
ABL1	2 common elements in "Fibroblast_EMT" and "BrCells_EMT":
AKT1	CD44
AKT2	FBLN5
ALX1
BRAF
CD44
CDKN1B
CSNK2B
CUL4A
DPP4
EHT-1864
EIF3E
EIF4E
ELF5
ERF
ESRP1
ESRP2
FBLN5
FGFR1
GPI
GRHL2
GSC
HNRNPM
HRAS
IDH1
IGF1R
IKBKB
ILK
ITGB3
KDM6B
KISS1
KISS1R
KLF4
KLF8
KRAS
LTB4R2
MAP2K2
Map3k7
MAPK1
MEMO1
MK2206
MRAS
NAMPT
NFkB
NFKBIA
NSC23766
OBSCN
PCBP1
PIK3CA
PIN1
PP1
RAC1
SEMA7A
SERPINB3
SKIL
SNAI1
SNAI2
SP600125
SPP1
SSBP1
STK11
STMN1
TAZ
TEAD
TGFB1
TGFB3
TGFBR
TGFBR1
TGFBR2
TGFBR3
TNFRSF11A
TP63
TP73
TRAF4
TWIST1
WT1
WWC1
ZEB2
