# Supplementary material for: TP53mutation–associated and copy number–dependent KDM7A-DT expression affects DNA repair and promotes invasive breast cancer progression
Source: Research Square preprint supplement (doi:10.21203/rs.3.rs-1896103/v3), 2022-09-27
Supplement: Supplementary file 8 [file 318d9aec482f8ad800f5ad7b.xlsx]

## Sheet: ST4
Table S4. Analysis of the top up-regulated and down-regulated gene sets induced by the over-expression of KDM7A-DT in non-cancer fibroblast cells
	Gene Probe ID	GeneTarget ID	Average Expression	Average Expression (log2)	Fold change (FC) (KDM7A-DT over-expression vs EV (control))	Log2 Fold change (FC) (KDM7A-DT over-expression vs EV(control))	Luma T-test	T-test p-value	p.value.adj (Adjusted p value)	F-test	F-test p-value	Gene definition	up:1, down:-1; at p<0.002, 0.5>FC>2
A. n=23
1	ILMN_1793474	INSIG1	2134.97	11.06	4.20178	2.071	9.85	<1e-06	<1e-06	97.08	0	insulin induced gene 1	1
2	ILMN_2053415	LDLR	6338.83	12.63	3.97512	1.991	16.97	<1e-06	<1e-06	287.86	0	low density lipoprotein receptor	1
3	ILMN_1689329	SCD	5792.62	12.5	3.72696	1.898	14.01	<1e-06	<1e-06	196.29	0	stearoyl-CoA desaturase (delta-9-desaturase)	1
4	ILMN_1680618	MYC	1269.46	10.31	3.00424	1.587	14.5	<1e-06	<1e-06	210.27	0	v-myc myelocytomatosis viral oncogene homolog (avian)	1
5	ILMN_2150851	SERPINB2	1209.34	10.24	2.79723	1.484	5.61	<1e-06	9.7e-05	31.48	0	serpin peptidase inhibitor, clade B (ovalbumin), member 2	1
6	ILMN_1670134	FADS1	1652	10.69	2.7057	1.436	12.12	<1e-06	<1e-06	146.89	0	fatty acid desaturase 1	1
7	ILMN_1671554	LPIN1	2076.59	11.02	2.69447	1.43	10.59	<1e-06	<1e-06	112.05	0	lipin 1	1
8	ILMN_1784871	FASN	5996.9	12.55	2.63171	1.396	9.91	<1e-06	<1e-06	98.15	0	fatty acid synthase	1
9	ILMN_2110908	MYC	803.414	9.65	2.58291	1.369	12.3	<1e-06	<1e-06	151.18	0	v-myc myelocytomatosis viral oncogene homolog (avian)	1
10	ILMN_3251550	PHLDA1	861.078	9.75	2.51577	1.331	9.21	<1e-06	<1e-06	84.77	0	pleckstrin homology-like domain, family A, member 1	1
11	ILMN_2150856	SERPINB2	1217.75	10.25	2.45547	1.296	4.86	3e-05	0.000574	23.59	3e-05	serpin peptidase inhibitor, clade B (ovalbumin), member 2	1
12	ILMN_1703852	EFNB2	652.575	9.35	2.44359	1.289	13.89	<1e-06	<1e-06	192.87	0	ephrin-B2	1
13	ILMN_1720889	SC4MOL	1606.83	10.65	2.38502	1.254	9.46	<1e-06	<1e-06	89.43	0	methylsterol monooxygenase 1	1
14	ILMN_1683664	SINHCAF/FAM60A	2062.24	11.01	2.19162	1.132	11.95	<1e-06	<1e-06	142.82	0	SIN3-HDAC complex-associated factor	1
15	ILMN_1784459	MMP3	1746.2	10.77	2.16145	1.112	4.47	9e-05	0.001414	20	9e-05	matrix metallopeptidase 3 (stromelysin 1, progelatinase)	1
16	ILMN_2105919	FGF2	929.3	9.86	2.12579	1.088	8.74	<1e-06	<1e-06	76.42	0	fibroblast growth factor 2 (basic)	1
17	ILMN_2089329	SPRY2	2105.58	11.04	2.09072	1.064	11.19	<1e-06	<1e-06	125.31	0	sprouty homolog 2 (Drosophila)	1
18	ILMN_1768534	BHLHB2	814.629	9.67	2.0648	1.046	8.35	<1e-06	<1e-06	69.67	0	basic helix-loop-helix family, member e40	1
19	ILMN_1898124	SNHG15	699.413	9.45	2.04344	1.031	9.65	<1e-06	<1e-06	93.21	0	small nucleolar RNA host gene 15 (non-protein coding)	1
20	ILMN_1686989	INSIG1	229.126	7.84	2.04202	1.03	8.53	<1e-06	<1e-06	72.78	0	insulin induced gene 1	1
21	ILMN_3272603	SIN3HCAF/FAM60A	560.278	9.13	2.03214	1.023	9.75	<1e-06	<1e-06	95.04	0	SIN3-HDAC complex-associated factor	1
22	ILMN_1723158	NOP2	1629.26	10.67	2.03073	1.022	10.51	<1e-06	<1e-06	110.45	0	NOP2 nucleolar protein homolog (yeast)	1
23	ILMN_1678842	THBS2	455.087	8.83	2.00277	1.002	8.45	<1e-06	<1e-06	71.41	0	thrombospondin 2	1
B. n=88
1	ILMN_1785272	COL1A2	4608.24	12.17	0.211393	-2.242	-16.85	<1e-06	<1e-06	283.76	0	collagen, type I, alpha 2	-1
2	ILMN_2104356	COL1A2	7181.15	12.81	0.214195	-2.223	-15.94	<1e-06	<1e-06	254.02	0	collagen, type I, alpha 2	-1
3	ILMN_2347798	IFI6	5042.77	12.3	0.228141	-2.132	-6.32	<1e-06	1.9e-05	39.92	0	interferon, alpha-inducible protein 6	-1
4	ILMN_1795325	ACTG2	11665.8	13.51	0.237007	-2.077	-14.36	<1e-06	<1e-06	206.34	0	actin, gamma 2, smooth muscle, enteric	-1
5	ILMN_1652826	LRRC17	2048	11	0.238986	-2.065	-16.65	<1e-06	<1e-06	277.27	0	leucine rich repeat containing 17	-1
6	ILMN_1658356	PAMR1	2797.65	11.45	0.255607	-1.968	-14.12	<1e-06	<1e-06	199.25	0	peptidase domain containing associated with muscle regeneration 1	-1
7	ILMN_1725090	CTHRC1	5367.37	12.39	0.257385	-1.958	-13.05	<1e-06	<1e-06	170.43	0	collagen triple helix repeat containing 1	-1
8	ILMN_1726589	CD248	7912.95	12.95	0.26134	-1.936	-12.87	<1e-06	<1e-06	165.7	0	CD248 molecule, endosialin	-1
9	ILMN_2117508	CTHRC1	2005.85	10.97	0.272627	-1.875	-12.88	<1e-06	<1e-06	165.87	0	collagen triple helix repeat containing 1	-1
10	ILMN_1801246	IFITM1	7281.4	12.83	0.288771	-1.792	-4.71	5e-05	0.00082	22.16	5e-05	interferon induced transmembrane protein 1	-1
11	ILMN_1701308	COL1A1	6080.61	12.57	0.291385	-1.779	-11.91	<1e-06	<1e-06	141.87	0	collagen, type I, alpha 1	-1
12	ILMN_1738742	PLAT	3019.3	11.56	0.294023	-1.766	-9.35	<1e-06	<1e-06	87.37	0	plasminogen activator, tissue	-1
13	ILMN_2315979	LBH	2194.99	11.1	0.303549	-1.72	-14.91	<1e-06	<1e-06	222.29	0	limb bud and heart development homolog (mouse)	-1
14	ILMN_1778668	TAGLN	33923.6	15.05	0.32421	-1.625	-13.56	<1e-06	<1e-06	183.97	0	transgelin	-1
15	ILMN_1784749	GAS6	10015.9	13.29	0.32942	-1.602	-17.42	<1e-06	<1e-06	303.39	0	growth arrest-specific 6	-1
16	ILMN_1724686	CLDN1	1584.71	10.63	0.330106	-1.599	-7.43	<1e-06	2e-06	55.23	0	claudin 1	-1
17	ILMN_1779558	GAS6	11346.8	13.47	0.330564	-1.597	-16.42	<1e-06	<1e-06	269.56	0	growth arrest-specific 6	-1
18	ILMN_1779875	THY1	3615.55	11.82	0.330793	-1.596	-13.18	<1e-06	<1e-06	173.8	0	Thy-1 cell surface antigen	-1
19	ILMN_2400935	TAGLN	4770.75	12.22	0.331711	-1.592	-10.09	<1e-06	<1e-06	101.79	0	transgelin	-1
20	ILMN_1693009	FGL2	464.65	8.86	0.332402	-1.589	-15.77	<1e-06	<1e-06	248.57	0	fibrinogen-like 2	-1
21	ILMN_1705750	TGM2	2225.63	11.12	0.339386	-1.559	-12.41	<1e-06	<1e-06	154.11	0	transglutaminase 2 (C polypeptide, protein-glutamine-gamma-glutamyltransferase)	-1
22	ILMN_1669362	IGFBP6	2304.12	11.17	0.355027	-1.494	-11.72	<1e-06	<1e-06	137.46	0	insulin-like growth factor binding protein 6	-1
23	ILMN_1713266	FAM46C	1640.59	10.68	0.356754	-1.487	-13.96	<1e-06	<1e-06	194.82	0	family with sequence similarity 46, member C	-1
24	ILMN_1773079	COL3A1	1734.13	10.76	0.35824	-1.481	-11.68	<1e-06	<1e-06	136.46	0	collagen, type III, alpha 1	-1
25	ILMN_1662358	MX1	5042.77	12.3	0.358737	-1.479	-4.42	0.00011	0.001599	19.52	0.00011	myxovirus (influenza virus) resistance 1, interferon-inducible protein p78 (mouse)	-1
26	ILMN_2062468	IGFBP7	5042.77	12.3	0.361233	-1.469	-7.93	<1e-06	1e-06	62.94	0	insulin-like growth factor binding protein 7	-1
27	ILMN_1669523	FOS	324.034	8.34	0.37475	-1.416	-11.87	<1e-06	<1e-06	141	0	FBJ murine osteosarcoma viral oncogene homolog	-1
28	ILMN_1815057	PDGFRB	1951	10.93	0.378929	-1.4	-11.63	<1e-06	<1e-06	135.16	0	platelet-derived growth factor receptor, beta polypeptide	-1
29	ILMN_2350634	EFEMP1	2076.59	11.02	0.383687	-1.382	-6.23	<1e-06	2.3e-05	38.87	0	EGF containing fibulin-like extracellular matrix protein 1	-1
30	ILMN_2067269	RECK	1074.91	10.07	0.387428	-1.368	-10.46	<1e-06	<1e-06	109.31	0	reversion-inducing-cysteine-rich protein with kazal motifs	-1
31	ILMN_1713751	ADAM19	2272.4	11.15	0.388773	-1.363	-8.54	<1e-06	<1e-06	72.98	0	ADAM metallopeptidase domain 19	-1
32	ILMN_2133675	SGSH	1606.83	10.65	0.393109	-1.347	-10.85	<1e-06	<1e-06	117.8	0	N-sulfoglucosamine sulfohydrolase	-1
33	ILMN_1653028	COL4A1	6517.03	12.67	0.395295	-1.339	-4.85	3e-05	0.000588	23.5	3e-05	collagen, type IV, alpha 1	-1
34	ILMN_2223941	FBLN5	1698.45	10.73	0.39832	-1.328	-10.11	<1e-06	<1e-06	102.2	0	fibulin 5	-1
35	ILMN_3248591	LTBP2	729.114	9.51	0.403601	-1.309	-10.7	<1e-06	<1e-06	114.59	0	latent transforming growth factor beta binding protein 2	-1
36	ILMN_1678493	CHN1	2134.97	11.06	0.40669	-1.298	-12.89	<1e-06	<1e-06	166.23	0	chimerin (chimaerin) 1	-1
37	ILMN_1707727	ANGPTL4	948.826	9.89	0.408668	-1.291	-7.2	<1e-06	3e-06	51.88	0	angiopoietin-like 4	-1
38	ILMN_1657373	LEPREL1	2241.11	11.13	0.409235	-1.289	-5.86	<1e-06	5.5e-05	34.36	0	leprecan-like 1	-1
39	ILMN_1720048	CCL2	3104.19	11.6	0.412081	-1.279	-4.44	1e-04	0.001526	19.69	1e-04	chemokine (C-C motif) ligand 2	-1
40	ILMN_2089875	TNFSF4	1052.79	10.04	0.413512	-1.274	-9.93	<1e-06	<1e-06	98.63	0	tumor necrosis factor (ligand) superfamily, member 4	-1
41	ILMN_1767665	LOC493869	2683.69	11.39	0.421908	-1.245	-13.44	<1e-06	<1e-06	180.6	0	glutathione peroxidase 8 (putative)	-1
42	ILMN_1672536	FBLN1	1871.53	10.87	0.424548	-1.236	-11.05	<1e-06	<1e-06	122.09	0	fibulin 1	-1
43	ILMN_1722820	KDELR3	2091.03	11.03	0.425432	-1.233	-8.73	<1e-06	<1e-06	76.22	0	KDEL (Lys-Asp-Glu-Leu) endoplasmic reticulum protein retention receptor 3	-1
44	ILMN_1698243	C1ORF85	2076.59	11.02	0.428094	-1.224	-11.46	<1e-06	<1e-06	131.35	0	chromosome 1 open reading frame 85	-1
45	ILMN_2407168	S100A13	2435.5	11.25	0.430475	-1.216	-7.45	<1e-06	2e-06	55.44	0	S100 calcium binding protein A13	-1
46	ILMN_2058782	IFI27	1964.57	10.94	0.43407	-1.204	-2.76	0.00956	0.055167	7.6	0.00956	interferon, alpha-inducible protein 27	0
47	ILMN_1713901	KDELR3	2179.83	11.09	0.434672	-1.202	-10.1	<1e-06	<1e-06	102.01	0	KDEL (Lys-Asp-Glu-Leu) endoplasmic reticulum protein retention receptor 3	-1
48	ILMN_1667893	TNS3	2740.08	11.42	0.437392	-1.193	-10.52	<1e-06	<1e-06	110.62	0	tensin 3	-1
49	ILMN_1680339	PDGFRL	1370.04	10.42	0.439825	-1.185	-9.64	<1e-06	<1e-06	92.9	0	platelet-derived growth factor receptor-like	-1
50	ILMN_1693334	P4HA1	1629.26	10.67	0.443498	-1.173	-7.63	<1e-06	1e-06	58.27	0	prolyl 4-hydroxylase, alpha polypeptide I	-1
51	ILMN_1684391	PLOD1	7967.99	12.96	0.444421	-1.17	-11.28	<1e-06	<1e-06	127.27	0	procollagen-lysine, 2-oxoglutarate 5-dioxygenase 1	-1
52	ILMN_1766914	MFAP4	1910.85	10.9	0.445655	-1.166	-6.26	<1e-06	2.2e-05	39.23	0	microfibrillar-associated protein 4	-1
53	ILMN_1729117	COL5A2	2610.3	11.35	0.445964	-1.165	-7.5	<1e-06	1e-06	56.24	0	collagen, type V, alpha 2	-1
54	ILMN_1790689	CRISPLD2	625.992	9.29	0.454389	-1.138	-8.44	<1e-06	<1e-06	71.18	0	cysteine-rich secretory protein LCCL domain containing 2	-1
55	ILMN_1738116	TMEM119	522.758	9.03	0.456283	-1.132	-6.62	<1e-06	1e-05	43.89	0	transmembrane protein 119	-1
56	ILMN_1663866	TGFBI	6936.54	12.76	0.456599	-1.131	-10.34	<1e-06	<1e-06	106.99	0	transforming growth factor, beta-induced, 68kDa	-1
57	ILMN_2129572	F3	4096	12	0.458184	-1.126	-9.87	<1e-06	<1e-06	97.4	0	coagulation factor III (thromboplastin, tissue factor)	-1
58	ILMN_1660794	LBH	714.109	9.48	0.461052	-1.117	-8.73	<1e-06	<1e-06	76.27	0	limb bud and heart development homolog (mouse)	-1
59	ILMN_1736670	PPP1R3C	1499.22	10.55	0.462011	-1.114	-8.59	<1e-06	<1e-06	73.71	0	protein phosphatase 1, regulatory subunit 3C	-1
60	ILMN_1797236	TGM2	413.001	8.69	0.462011	-1.114	-12.28	<1e-06	<1e-06	150.84	0	transglutaminase 2 (C polypeptide, protein-glutamine-gamma-glutamyltransferase)	-1
61	ILMN_1798952	KDELR3	1305.15	10.35	0.463937	-1.108	-9.73	<1e-06	<1e-06	94.6	0	KDEL (Lys-Asp-Glu-Leu) endoplasmic reticulum protein retention receptor 3	-1
62	ILMN_1788955	PDLIM1	3350.13	11.71	0.464902	-1.105	-8.85	<1e-06	<1e-06	78.35	0	PDZ and LIM domain 1	-1
63	ILMN_1698213	RBM3	1060.11	10.05	0.466193	-1.101	-9.57	<1e-06	<1e-06	91.51	0	RNA binding motif (RNP1, RRM) protein 3	-1
64	ILMN_1792885	CTSC	3444.31	11.75	0.467488	-1.097	-6.2	<1e-06	2.5e-05	38.45	0	cathepsin C	-1
65	ILMN_1702231	C1ORF54	1097.5	10.1	0.467488	-1.097	-6.25	<1e-06	2.2e-05	39.12	0	chromosome 1 open reading frame 54	-1
66	ILMN_1714820	ITGB1	2469.49	11.27	0.469111	-1.092	-9.09	<1e-06	<1e-06	82.58	0	integrin, beta 1 (fibronectin receptor, beta polypeptide, antigen CD29 includes MDF2, MSK12)	-1
67	ILMN_2329735	ECM1	1398.83	10.45	0.470739	-1.087	-11.78	<1e-06	<1e-06	138.73	0	extracellular matrix protein 1	-1
68	ILMN_1802654	GLT8D2	837.532	9.71	0.472046	-1.083	-9.64	<1e-06	<1e-06	93.02	0	glycosyltransferase 8 domain containing 2	-1
69	ILMN_1759097	MLLT11	1951	10.93	0.476319	-1.07	-9.12	<1e-06	<1e-06	83.22	0	myeloid/lymphoid or mixed-lineage leukemia (trithorax homolog, Drosophila)	-1
70	ILMN_1693394	BCKDK	2740.08	11.42	0.476649	-1.069	-12.87	<1e-06	<1e-06	165.52	0	branched chain ketoacid dehydrogenase kinase	-1
71	ILMN_1696347	CTSC	2105.58	11.04	0.47698	-1.068	-6.69	<1e-06	8e-06	44.72	0	cathepsin C	-1
72	ILMN_1781626	C1S	975.501	9.93	0.477311	-1.067	-5.61	<1e-06	9.8e-05	31.44	0	complement component 1, s subcomponent	-1
73	ILMN_1773567	LAMA5	1314.23	10.36	0.478304	-1.064	-11.36	<1e-06	<1e-06	129.05	0	laminin, alpha 5	-1
74	ILMN_1776005	OSTC	5042.77	12.3	0.479965	-1.059	-8.33	<1e-06	<1e-06	69.38	0	oligosaccharyltransferase complex subunit	-1
75	ILMN_1706505	COL5A1	2385.37	11.22	0.481297	-1.055	-6.37	<1e-06	1.7e-05	40.54	0	collagen, type V, alpha 1	-1
76	ILMN_1666819	PHLDB1	1573.76	10.62	0.485317	-1.043	-9.36	<1e-06	<1e-06	87.64	0	pleckstrin homology-like domain, family B, member 1	-1
77	ILMN_1688630	RECK	544.958	9.09	0.48599	-1.041	-9.64	<1e-06	<1e-06	93	0	reversion-inducing-cysteine-rich protein with kazal motifs	-1
78	ILMN_1716687	TPM1	4770.75	12.22	0.487678	-1.036	-8.16	<1e-06	<1e-06	66.51	0	tropomyosin 1 (alpha)	-1
79	ILMN_2173611	MT1E	6208.38	12.6	0.488016	-1.035	-6.21	<1e-06	2.4e-05	38.55	0	metallothionein 1E	-1
80	ILMN_1662419	COX7A1	2817.11	11.46	0.489032	-1.032	-8.16	<1e-06	<1e-06	66.58	0	cytochrome c oxidase subunit VIIa polypeptide 1 (muscle)	-1
81	ILMN_1790529	LUM	576.03	9.17	0.48971	-1.03	-5.79	<1e-06	6.4e-05	33.49	0	lumican	-1
82	ILMN_1700950	LOC646567	2091.03	11.03	0.49073	-1.027	-9.43	<1e-06	<1e-06	88.99	0	oligosaccharyltransferase complex subunit pseudogene 2	-1
83	ILMN_2066151	TEK	560.278	9.13	0.491751	-1.024	-5.24	1e-05	0.00023	27.47	1e-05	TEK tyrosine kinase, endothelial	-1
84	ILMN_2188264	CYR61	6338.83	12.63	0.492433	-1.022	-8.81	<1e-06	<1e-06	77.54	0	cysteine-rich, angiogenic inducer, 61	-1
85	ILMN_1808713	HSD17B2	929.3	9.86	0.494143	-1.017	-7.64	<1e-06	1e-06	58.39	0	hydroxysteroid (17-beta) dehydrogenase 2	-1
86	ILMN_1707070	PCOLCE	2134.97	11.06	0.496202	-1.011	-11.69	<1e-06	<1e-06	136.56	0	procollagen C-endopeptidase enhancer	-1
87	ILMN_1795778	P4HA2	1686.71	10.72	0.496202	-1.011	-8.65	<1e-06	<1e-06	74.86	0	prolyl 4-hydroxylase, alpha polypeptide II	-1
88	ILMN_1815673	DKK3	20452.6	14.32	0.497925	-1.006	-10.08	<1e-06	<1e-06	101.52	0	dickkopf 3 homolog (Xenopus laevis)	-1
