# Supplementary material for: TP53mutation–associated and copy number–dependent KDM7A-DT expression affects DNA repair and promotes invasive breast cancer progression
Source: Research Square preprint supplement (doi:10.21203/rs.3.rs-1896103/v3), 2022-09-27
Supplement: Supplementary file 9 [file 3311feadd450bfa111e4f989.xlsx]

## Sheet: ST7
Table S7. KDM7A-DT unduced Type 2 (fibroblasts) EMT pathway related signature.
n	Gene symbol	Chromosome location	Approved name	HGNC ID	Ensembl gene ID	NCBI gene ID	Down-regulated Genes In human normal fibroblasts after neuronal differentiation, GSE84013	Down-regulated genes In Huntington's disease patient Fibroblasts after neuronal differentiation, GSE84013	DB EMT-2 (cancer EMT genes)
1	ACTA2	10q23.31	actin alpha 2, smooth muscle	130	ENSG00000107796	59	ACTA2	ACTA2
2	ANPEP	15q26.1	alanyl aminopeptidase, membrane	500	ENSG00000166825	290	ANPEP	ANPEP
3	BGN	Xq28	biglycan	1044	ENSG00000182492	633	BGN	BGN
4	BMP1	8p21.3	bone morphogenetic protein 1	1067	ENSG00000168487	649	BMP1	BMP1
5	CALD1	7q33	caldesmon 1	1441	ENSG00000122786	800	CALD1	CALD1
6	CALU	7q32.1	calumenin	1458	ENSG00000128595	813	CALU	CALU
7	CAP2	6p22.3	cyclase associated actin cytoskeleton regulatory protein 2	20039	ENSG00000112186	10486	CCN1	CCN1
8	CCN1	1p22.3	cellular communication network factor 1	2654	ENSG00000142871	3491	CCN2	CCN2
9	CCN2	6q23.2	cellular communication network factor 2	2500	ENSG00000118523	1490	CD44	CD44
10	CD44	11p13	CD44 molecule (Indian blood group)	1681	ENSG00000026508	960	CDH11		TumSuppressorEMT
11	CDH6	5p13.3	cadherin 6	1765	ENSG00000113361	1004	COL12A1
12	CDH11	16q21	cadherin 11	1750	ENSG00000140937	1009	COL16A1	CDH11	TumSuppressorEMT
13	COL1A1	17q21.33	collagen type I alpha 1 chain	2197	ENSG00000108821	1277	COL1A1	COL1A1
14	COL1A2	7q21.3	collagen type I alpha 2 chain	2198	ENSG00000164692	1278	COL1A2	COL1A2
15	COL3A1	2q32.2	collagen type III alpha 1 chain	2201	ENSG00000168542	1281	COL3A1	COL3A1
16	COL4A1	13q34	collagen type IV alpha 1 chain	2202	ENSG00000187498	1282	COL4A1	COL4A1
17	COL4A2	13q34	collagen type IV alpha 2 chain	2203	ENSG00000134871	1284	COL4A2	COL4A2
18	COL5A1	9q34.3	collagen type V alpha 1 chain	2209	ENSG00000130635	1289	COL5A1	COL5A1
19	COL5A2	2q32.2	collagen type V alpha 2 chain	2210	ENSG00000204262	1290	COL5A2	COL5A2
20	COL6A2	21q22.3	collagen type VI alpha 2 chain	2212	ENSG00000142173	1292	COL6A2	COL6A2
21	COL6A3	2q37.3	collagen type VI alpha 3 chain	2213	ENSG00000163359	1293	COL6A3	COL6A3
22	COL7A1	3p21.31	collagen type VII alpha 1 chain	2214	ENSG00000114270	1294	COL7A1	COL7A1
23	COL12A1	6q13-q14.1	collagen type XII alpha 1 chain	2188	ENSG00000111799	1303		COL12A1
24	COL16A1	1p35.2	collagen type XVI alpha 1 chain	2193	ENSG00000084636	1307		COL16A1
25	COLGALT1	19p13.11	collagen beta(1-O)galactosyltransferase 1	26182	ENSG00000130309	79709	COLGALT1	COLGALT1
26	CTHRC1	8q22.3	collagen triple helix repeat containing 1	18831	ENSG00000164932	115908	CTHRC1	CTHRC1
27	DCN	12q21.33	decorin	2705	ENSG00000011465	1634	DCN	DCN
28	ECM1	1q21.2	extracellular matrix protein 1	3153	ENSG00000143369	1893	ECM1	ECM1
29	ENO2	12p13.31	enolase 2	3353	ENSG00000111674	2026
30	FAP	2q24.2	fibroblast activation protein alpha	3590	ENSG00000078098	2191	FAP	FAP
31	FBLN1	22q13.31	fibulin 1	3600	ENSG00000077942	2192	FBLN1	FBLN1	TumSuppressorEMT
32	FBLN5	14q32.12	fibulin 5	3602	ENSG00000140092	10516	FBLN5	FBLN5
33	FBN2	5q23.3	fibrillin 2	3604	ENSG00000138829	2201	FBN2
34	FERMT2	14q22.1	FERM domain containing kindlin 2	15767	ENSG00000073712	10979	FERMT2	FERMT2
35	FSTL1	3q13.33	follistatin like 1	3972	ENSG00000163430	11167	FSTL1	FSTL1
36	FSTL3	19p13.3	follistatin like 3	3973	ENSG00000070404	10272	FSTL3	FSTL3
37	GLIPR1	12q21.2	GLI pathogenesis related 1	17001	ENSG00000139278	11010	GLIPR1	GLIPR1
38	GPX7	1p32.3	glutathione peroxidase 7	4559	ENSG00000116157	2882	GPX7	GPX7
39	HTRA1	10q26.13	HtrA serine peptidase 1	9476	ENSG00000166033	5654	HTRA1	HTRA1
40	IGFBP3	7p12.3	insulin like growth factor binding protein 3	5472	ENSG00000146674	3486	IGFBP3	IGFBP3	TumSuppressorEMT
41	IL6	7p15.3	interleukin 6	6018	ENSG00000136244	3569	IL6	IL6
42	ITGA5	12q13.13	integrin subunit alpha 5	6141	ENSG00000161638	3678	ITGA5	ITGA5	TumSuppressorEMT
43	ITGAV	2q32.1	integrin subunit alpha V	6150	ENSG00000138448	3685	ITGAV
44	ITGB1	10p11.22	integrin subunit beta 1	6153	ENSG00000150093	3688	ITGB1	ITGB1	TumSuppressorEMT
45	ITGB5	3q21.2	integrin subunit beta 5	6160	ENSG00000082781	3693	ITGB5	ITGB5
46	LGALS1	22q13.1	galectin 1	6561	ENSG00000100097	3956	LGALS1	LGALS1
47	LOX	5q23.1	lysyl oxidase	6664	ENSG00000113083	4015	LOX	LOX	TumSuppressorEMT
48	LOXL1	15q24.1	lysyl oxidase like 1	6665	ENSG00000129038	4016	LOXL1	LOXL1
49	LUM	12q21.33	lumican	6724	ENSG00000139329	4060	LUM	LUM
50	MATN2	8q22.1-q22.2	matrilin 2	6908	ENSG00000132561	4147
51	MXRA5	Xp22.33	matrix remodeling associated 5	7539	ENSG00000101825	25878	MXRA5	MXRA5
52	MYL9	20q11.23	myosin light chain 9	15754	ENSG00000101335	10398	MYL9	MYL9
53	MYLK	3q21.1	myosin light chain kinase	7590	ENSG00000065534	4638	MYLK	MYLK
54	NID2	14q22.1	nidogen 2	13389	ENSG00000087303	22795
55	NNMT	11q23.2	nicotinamide N-methyltransferase	7861	ENSG00000166741	4837	NNMT	NNMT
56	NTM	11q25	neurotrimin	17941	ENSG00000182667	50863
57	P3H1	1p34.2	prolyl 3-hydroxylase 1	19316	ENSG00000117385	64175	P3H1	P3H1
58	PCOLCE	7q22.1	procollagen C-endopeptidase enhancer	8738	ENSG00000106333	5118	PCOLCE	PCOLCE
59	PDGFRB	5q32	platelet derived growth factor receptor beta	8804	ENSG00000113721	5159	PDGFRB	PDGFRB	OncoEMT
60	PFN2	3q25.1	profilin 2	8882	ENSG00000070087	5217
61	PLAUR	19q13	plasminogen activator, urokinase receptor	9053	ENSG00000011422	5329	PLAUR	PLAUR
62	PLOD1	1p36.22	procollagen-lysine,2-oxoglutarate 5-dioxygenase 1	9081	ENSG00000083444	5351	PLOD1	PLOD1
63	PLOD2	3q24	procollagen-lysine,2-oxoglutarate 5-dioxygenase 2	9082	ENSG00000152952	5352	PLOD2	PLOD2
64	PLOD3	7q22.1	procollagen-lysine,2-oxoglutarate 5-dioxygenase 3	9083	ENSG00000106397	8985	PLOD3	PLOD3
65	PMP22	17p12	peripheral myelin protein 22	9118	ENSG00000109099	5376	PMP22	PMP22
66	PPIB	15q22.31	peptidylprolyl isomerase B	9255	ENSG00000166794	5479	PPIB	PPIB
67	QSOX1	1q25.2	quiescin sulfhydryl oxidase 1	9756	ENSG00000116260	5768	QSOX1	QSOX1
68	SDC1	2p24.1	syndecan 1	10658	ENSG00000115884	6382	SDC1	SDC1
69	SERPINE1	7q22.1	serpin family E member 1	8583	ENSG00000106366	5054	SERPINE1	SERPINE1
70	SERPINH1	11q13.5	serpin family H member 1	1546	ENSG00000149257	871	SERPINH1	SERPINH1
71	SFRP1	8p11.21	secreted frizzled related protein 1	10776	ENSG00000104332	6422
72	SGCB	4q12	sarcoglycan beta	10806	ENSG00000163069	6443	SGCD	SGCD
73	SGCD	5q33.2-q33.3	sarcoglycan delta	10807	ENSG00000170624	6444
74	SPOCK1	5q31.2	SPARC (osteonectin), cwcv and kazal like domains proteoglycan 1	11251	ENSG00000152377	6695
75	TAGLN	11q23.3	transgelin	11553	ENSG00000149591	6876	TAGLN	TAGLN
76	TFPI2	7q21.3	tissue factor pathway inhibitor 2	11761	ENSG00000105825	7980
77	TGFBI	5q31.1	transforming growth factor beta induced	11771	ENSG00000120708	7045	TGFBI	TGFBI
78	TGM2	20q11.23	transglutaminase 2	11778	ENSG00000198959	7052	TGM2	TGM2
79	THBS1	15q14	thrombospondin 1	11785	ENSG00000137801	7057	THBS1	THBS1
80	THY1	11q23.3	Thy-1 cell surface antigen	11801	ENSG00000154096	7070	THY1	THY1
81	TIMP1	Xp11.3	TIMP metallopeptidase inhibitor 1	11820	ENSG00000102265	7076	TIMP1	TIMP1
82	TNC	9q33.1	tenascin C	5318	ENSG00000041982	3371	TNC	TNC
83	TNFAIP3	6q23.3	TNF alpha induced protein 3	11896	ENSG00000118503	7128
84	TPM1	15q22.2	tropomyosin 1	12010	ENSG00000140416	7168	TPM1	TPM1
85	TPM2	9p13.3	tropomyosin 2	12011	ENSG00000198467	7169	TPM2	TPM2
86	VCAN	5q14.2-q14.3	versican	2464	ENSG00000038427	1462	VCAN
87	VEGFC	4q34.3	vascular endothelial growth factor C	12682	ENSG00000150630	7424	VEGFC	VEGFC
88	WNT5A	3p14.3	Wnt family member 5A	12784	ENSG00000114251	7474	WNT5A	WNT5A	Dual_EMT
