# Supplementary material for: TP53mutation–associated and copy number–dependent KDM7A-DT expression affects DNA repair and promotes invasive breast cancer progression
Source: Research Square preprint supplement (doi:10.21203/rs.3.rs-1896103/v3), 2022-09-27
Supplement: Supplementary file 10 [file 5c0c846d896c377c5485ea8c.xlsx]

## Sheet: ST19.A.B
Table S19. Venn diagram gene ID subsets representing the breast cancer transcripts positivly and negativly correlated with the epression levels of KDM7A-DT RNA. The gene subsets were categirized onto Tumor suppressors and oncogenes and also Type II EMT. (TCGA breast cancer RNA-seq data were analysed).
A.	40 common elements in "Type II EMT" and "KDM7A-DT_posCorr":	4 common elements in "Type II EMT", "KDM7A-DT_posCorr" and "TumSuppressor":	40 elements included exclusively in "Type II EMT":	46 common elements in "KDM7A-DT_posCorr" and "TumSuppressor":	47 common elements in "OncoEMT" and "KDM7A-DT_posCorr":	207 elements included exclusively in "TumSuppressor":	143 elements included exclusively in "OncoEMT":	B.	3 common elements in "Type II EMT" and "KDM7A-DT_negCor":	77 elements included exclusively in "Type II EMT":	34 common elements in "KDM7A-DT_negCor" and "TumSuppressor":	219 elements included exclusively in "TumSuppressor":	23 common elements in "OncoEMT" and "KDM7A-DT_negCor":	167 elements included exclusively in "OncoEMT":
	WNT5A	IGFBP3	ANPEP	CD82	ALK	CREBBP	SKI		SGCB	ANPEP	ESR1	GPC3	GSK3A	SKI
	TNFAIP3	LOX	SGCB	DKK1	CXCR4	GPC3	GLI2		ENO2	FAP	GLS2	NUMB	PAK1	GLI2
	PLOD3	ITGB1	FAP	CTNNBIP1	PTP4A3	NUMB	AKT1		CAP2	ITGAV	CCNDBP1	MIR124-2	IGF1R	AKT1
	BMP1	FBLN1	ITGAV	DNMT3B	S100A8	MIR124-2	EIF3I		7 common elements in "Type II EMT" and "TumSuppressor":	WNT5A	TP53BP1	TP53BP2	MDM4	EIF3I
	SDC1	3 common elements in "Type II EMT" and "TumSuppressor":	LOXL1	ZYX	GOLPH3	MIR25	MTDH		IGFBP3	TNFAIP3	AGTR1	MIR25	MYB	MTDH
	MATN2	CDH11	HTRA1	DAPK1	EPCAM	AFAP1L2	ARHGEF2		CDH11	LOXL1	IFT88	HDAC3	TBX3	ARHGEF2
	MXRA5	ITGA5	VCAN	SOD2	WWTR1	HDAC3	GSK3A		ITGA5	PLOD3	NEDD4L	MIRLET7A1	NEAT1	MIR301A
	FERMT2	CD44	TIMP1	NDRG1	PIM2	MIRLET7A1	PAK1		LOX	HTRA1	SMAD4	VDR	MALAT1	ALK
	LGALS1	1 common element in "Type II EMT" and "OncoEMT":	PFN2	ANXA1	MYD88	VDR	MIR301A		CD44	VCAN	SPOP	NR1I2	IRS2	HSPB1
	IL6	PDGFRB	ENO2	ANGPTL4	ETS1	NR1I2	HSPB1		ITGB1	BMP1	AXIN2	CEACAM1	ITGA3	CXCR4
	PLAUR		SPOCK1	EPHB2	S100A4	CEACAM1	YWHAG		FBLN1	SDC1	SCUBE2	CTNNBIP1	PPM1D	YWHAG
	SFRP1		VEGFC	CFTR	GATA6	MIR122	MCL1		1 common element in "Type II EMT" and "OncoEMT":	TIMP1	NF1	MIR122	PTP4A2	MCL1
	FSTL1		COL12A1	KLK6	FOXQ1	IGFBP7	IGF1R		PDGFRB	PFN2	FBP1	IGFBP7	TFCP2	MAP3K7
	PPIB		SGCD	EGLN3	TAZ	VHL	MDM4			MATN2	INPP4B	VHL	MDM2	TWIST1
	GPX7		TFPI2	VSNL1	LCN2	YPEL3	MAP3K7			MXRA5	PRKAA2	YPEL3	PAX2	MIR135B
	COL6A2		PLOD2	ESR2	PLAC8	MIR494	TWIST1			SPOCK1	SLC9A3R1	MIR494	USP22	MUC1
	ACTA2		COL16A1	PRKAA1	MYCN	CTNND1	MIR135B			VEGFC	AFAP1L2	CTNND1	AR	PAK5
	CALU		FSTL3	TP53BP2	SNAI1	EPHB3	MUC1			COL12A1	RNF111	EPHB3	LETMD1	MYC
	TPM2		SERPINE1	HIF1A	MET	MIR145	PAK5			FERMT2	RHOB	MIR145	EIF4E	PTP4A3
	NNMT		NID2	FLNA	TXN	MIR487B	MYC			LGALS1	ARHGEF12	MIR487B	BMI1	KDM5B
	MYLK		THBS1	EED	ACTN4	LIMA1	KDM5B			SGCD	ABCG2	LIMA1	BCL2	MIR92B
	SERPINH1		DCN	CLDN1	CD24	MIR34C	MIR92B			TFPI2	SIRT3	MIR34C	FRAT1	ERBB2
	COLGALT1		COL6A3	TWIST2	CAMK1D	RUNX2	ERBB2			IL6	TSC1	RUNX2	CCND1	HOXD9
	GLIPR1		ITGB5	HOXB13	ROS1	MIR30C1	HOXD9			PLAUR	LRIG1	MIR30C1		MIR373
	P3H1		FBN2	FOXC1	PRKCA	HPGD	MIR373			PLOD2	LATS1	HPGD		RHOC
	TNC		COL7A1	FAS	YWHAZ	ABCG2	RHOC			SFRP1	CREBBP	MIR196B		MIR96
	MYL9		COL4A2	DAB2	FOSL1	MIR196B	MIR96			COL16A1	EPB41L3	HIPK2		LIN28A
	BGN		CCN2	RASAL2	HOTAIR	HIPK2	LIN28A			FSTL1	BRCA1	RNH1		CRK
	TPM1		NTM	CEBPA	MITF	RNH1	CRK			PPIB	PAWR	H2AFX		MIR506
	CALD1		QSOX1	ESRP1	UCA1	NEDD4L	MIR506			GPX7	PCGF2	MIR29B1		S100A8
	PCOLCE		PMP22	IRF8	YBX1	H2AFX	CREB1			FSTL3	DICER1	DKK3		CREB1
	CCN1		CAP2	CSF2	KIT	MIR29B1	RAB22A			SERPINE1	NR2C2	MIR152		GOLPH3
	LUM		CDH6	GSN	WNT1	SIRT3	HOXA9			NID2	TP53INP1	MIR141		RAB22A
	TGFBI		COL5A1	S100A2	MACC1	DKK3	JUNB			COL6A2	SMAD2	SIAH1		HOXA9
	PLOD1		ECM1	MEG3	CTSZ	MIR152	RAF1			THBS1		GSN		JUNB
	FBLN5		COL5A2	TNFAIP8L2	TLE1	MIR141	HRAS			DCN		KDM5A		RAF1
	TGM2		COL4A1	HIC1	AURKA	SIAH1	CDK14			COL6A3		RB1		EPCAM
	THY1		COL3A1	EPAS1	RAC1	KDM5A	SOX4			ITGB5		LEFTY1		HRAS
	TAGLN		COL1A1	NDRG2	BIRC5	INPP4B	SETDB1			ACTA2		MIRLET7D		WWTR1
	CTHRC1		COL1A2	FOXA2	ALDH1A1	RB1	MYB			CALU		ANXA1		CDK14
				BMP2	KLF8	LEFTY1	MIR19A			FBN2		DAB2		SOX4
				IL17A	BMP7	PCGF2	JUN			TPM2		PHLDA2		SETDB1
				SOCS3	GMNN	MIRLET7D	KRAS			COL7A1		MIR143		MIR19A
				SCRIB	EGFR	SMAD2	CEACAM6			NNMT		ZYX		PIM2
				PROX1	EML4	ARHGEF12	JAK2			COL4A2		MIR137		JUN
				GJB2	CRYAB	PHLDA2	FASN			CCN2		ESR2		KRAS
					SRC	MIR143	MIR130B			MYLK		NOTCH2		CEACAM6
						MIR137	TBX3			NTM		ISG15		MYD88
						NOTCH2	MIR221			SERPINH1		BBC3		JAK2
						SCUBE2	MIR517C			COLGALT1		MIR203A		FASN
						ISG15	MIR10B			GLIPR1		PRKAA1		MIR130B
						BBC3	PIK3CA			P3H1		TXNIP		MIR221
						MIR203A	FZD2			QSOX1		STK11		MIR517C
						SMAD4	FOXM1			TNC		AHR		ETS1
						TXNIP	AKT2			MYL9		CLDN1		S100A4
						STK11	FHL2			BGN		TCF4		GATA6
						AHR	CUL4A			PMP22		MIR194-1		MIR10B
						TCF4	NEAT1			TPM1		MIR181B1		FOXQ1
						MIR194-1	MIR191			CALD1		BMP4		PIK3CA
						MIR181B1	MIR224			CDH6		MIR218-2		FZD2
						FBP1	MIR93			PCOLCE		DKK1		TAZ
						BMP4	MKL2			CCN1		ESRRB		FOXM1
						MIR218-2	ETV4			LUM		TGFBR3		AKT2
						AXIN2	BRF2			COL5A1		MIR24-1		LCN2
						ESRRB	MIR21			ECM1		EGLN3		PLAC8
						TGFBR3	FGFR1			TGFBI		TGFBR2		FHL2
						MIR24-1	ZEB1-AS1			COL5A2		MIR375		MYCN
						TGFBR2	MALAT1			PLOD1		HNF4A		CUL4A
						MIR375	MIR485			FBLN5		STAT5A		MIR191
						TSC1	ELK1			COL4A1		S100A2		MIR224
						HNF4A	TBX2			COL3A1		MIR9-1		SNAI1
						STAT5A	BRD4			TGM2		CLU		MIR93
						SLC9A3R1	PRKCI			THY1		BATF2		MKL2
						MIR9-1	SQSTM1			TAGLN		MIR26A1		MET
						CLU	EIF5A2			COL1A1		MIR205		ETV4
						BATF2	ZNF217			CTHRC1		PEBP1		BRF2
						MIR26A1	MIR663A			COL1A2		KDM6A		MIR21
						MIR205	ERG					NR4A1		FGFR1
						PEBP1	TYMS					GSK3B		ZEB1-AS1
						KDM6A	IRS2					EPAS1		MIR485
						NR4A1	AKTIP					MIR101-1		ELK1
						GSK3B	ITGA3					MIR29A		TBX2
						MIR101-1	NANOG					GKN2		TXN
						MIR29A	PPM1D					MIR193A		BRD4
						GKN2	PTP4A2					HRG		PRKCI
						MIR193A	TRIM28					ROR2		SQSTM1
						HRG	MIR520G					MIRLET7G		EIF5A2
						ROR2	CIP2A					MIR206		ZNF217
						MIRLET7G	UHRF1					MIR132		ACTN4
						MIR206	ROCK1					PDCD4		MIR663A
						MIR132	TFCP2					IL17A		ERG
						PDCD4	CTNNB1					MTUS1		TYMS
						MTUS1	SREBF1					CXCR2		CD24
						CXCR2	LEF1					NUAK1		AKTIP
						NR2C2	GNA13					RACK1		NANOG
						NUAK1	MDM2					MIR214		CAMK1D
						RACK1	YY1					STAT1		TRIM28
						MIR214	PAX2					TNFAIP8L2		MIR520G
						STAT1	AXL					PKD1		ROS1
						AGTR1	ID1					NDRG2		CIP2A
						PKD1	BRAF					MIR146A		UHRF1
						ESR1	NCOA3					ATM		ROCK1
						MIR146A	PDGFB					FBXW7		CTNNB1
						ATM	EEF1D					GJB2		SREBF1
						FBXW7	BCL2L1					FOXC1		LEF1
						FOXO4	SIX1					FOXO4		GNA13
						KDM3A	ID2					KDM3A		YY1
						WWOX	ELAVL1					WWOX		AXL
						MIR211	HMGA2					MIR211		ID1
						ITGB3	BCL6					CD82		PRKCA
						WISP3	USP22					ITGB3		BRAF
						KL	EPS8					WISP3		YWHAZ
						MIR129-1	GLO1					DAPK1		NCOA3
						RHOB	AR					KL		PDGFB
						MIR181A1	BIRC2					MIR129-1		EEF1D
						DNMT1	NANOGP8					MIR181A1		FOSL1
						PCDH9	SATB1					DNMT1		HOTAIR
						SUFU	LETMD1					PCDH9		MITF
						MIR30A	EIF4E					SUFU		BCL2L1
						WNT11	NOTCH4					MIR30A		SIX1
						MIR136	CRKL					WNT11		ID2
						TDGF1	UBE3C					MIR136		ELAVL1
						IGF1	MIR106B					TDGF1		UCA1
						MIR497	BMI1					IGF1		YBX1
						PTPN6	FGFR2					MIR497		HMGA2
						LATS1	ETV1					PTPN6		BCL6
						FHL1	BCL2					FHL1		EPS8
						DICER1	MUC4					CSF2		GLO1
						BRD7	HSPA5					FAS		BIRC2
						DDR2	GAB2					BRD7		NANOGP8
						MIR106A	ELK3					DDR2		SATB1
						UIMC1	CBLB					VSNL1		KIT
						MIR10A	MIR454					MIR106A		WNT1
						EPB41L3	PIK3R1					UIMC1		NOTCH4
						MIR124-3	GATA1					MIR10A		MACC1
						MIR204	FRAT1					MIR124-3		CRKL
						MIR217	CCND1					MIR204		UBE3C
						MIR200A	HSPA4					MIR217		CTSZ
						ING4	SOX2					MIR200A		MIR106B
						PARP1	MIR128-1					HOXB13		FGFR2
						SPOP	MTOR					TWIST2		TLE1
						MIR200B	MLLT3					ING4		AURKA
						BRMS1	PLAGL2					PARP1		ETV1
						MIR218-1						DNMT3B		RAC1
						MIR101-2						MIR200B		MUC4
						NF1						BRMS1		HSPA5
						CXCL12						MIR218-1		GAB2
						CCNDBP1						MIR101-2		ELK3
						ERRFI1						RASAL2		CBLB
						MIR29C						CXCL12		BIRC5
						MIR424						SCRIB		MIR454
						FOXO3						PROX1		ALDH1A1
						MIR134						HIF1A		PIK3R1
						LRIG1						ERRFI1		GATA1
						KRT19						MIR29C		KLF8
						AXIN1						MIR424		BMP7
						PRKAA2						KLK6		GMNN
						ZFP36						FOXO3		HSPA4
						MARVELD1						MIR134		EGFR
						TNFSF12						ESRP1		SOX2
						TSC2						FLNA		MIR128-1
						THBD						FOXA2		EML4
						TP53						KRT19		MTOR
						MIR124-1						SOCS3		MLLT3
						CDH5						AXIN1		CRYAB
						RNF8						ZFP36		SRC
						MIR181A2						MARVELD1		PLAGL2
						BRCA1						TNFSF12
						EGR1						TSC2
						PTEN						THBD
						IL17RD						TP53
						MIR888						MIR124-1
						VEGFA						CDH5
						UHRF2						RNF8
						MIR449A						SOD2
						PAWR						MIR181A2
						MIRLET7B						EGR1
						RNF111						PTEN
						DAB2IP						IL17RD
						NFKB1						MIR888
						MIR33A						VEGFA
						PIN1						UHRF2
						MAP3K4						ANGPTL4
						MIR26A2						MIR449A
						TIMP3						MIRLET7B
						SFRP2						BMP2
						GLS2						DAB2IP
						TP53BP1						NFKB1
						TP53INP1						CEBPA
						TRIM62						MIR33A
						MIR326						PIN1
						IFT88						MAP3K4
						TUSC7						MIR26A2
						MIR186						TIMP3
						CDKN2A						SFRP2
						CDH13						TRIM62
						MIR185						MIR326
						MIR26B						TUSC7
						ERF						MIR186
						AJAP1						CDKN2A
						MIR15A						MEG3
						NOTCH3						EPHB2
						PTPA						CDH13
						CXCL14						MIR185
						MIR148A						MIR26B
						MIR187						ERF
						MIR100						AJAP1
												MIR15A
												EED
												NOTCH3
												PTPA
												NDRG1
												IRF8
												CXCL14
												MIR148A
												MIR187
												CFTR
												HIC1
												MIR100
