# Supplementary material for: TP53mutation–associated and copy number–dependent KDM7A-DT expression affects DNA repair and promotes invasive breast cancer progression
Source: Research Square preprint supplement (doi:10.21203/rs.3.rs-1896103/v3), 2022-09-27
Supplement: Supplementary file 11 [file 8125f6b78fd9a054d142cdc8.xlsx]

## Sheet: Sheet1
Table 1. Basic statistics of TCGA BRCA samples, clinical variables, and Spearman correlation coefficients between log2 (KDM7D-TD RNA), aneuploidy score, and other reported variables
Variables	Mean	Std.Dev.	Spearman Corr. Coefficient Log2 (KDM7A-DT RNA)	Spearman Corr. Coeff. Aneuploidy Score
log2 (KDM7A-DT RNA)	7.6259	1.0565	1	0.239667
log2 (TP53 mRNA)*	10.8672	0.6618	-	-
log2 (TP53BP1 mRNA)	10.0248	0.6296	-0.344074	-0.210966
Buffa Hypoxia Score	5.806	20.3248	0.35983	0.393373
Ragnum Hypoxia Score	9.5224	9.9519	0.262166	0.384386
3'UTR Mutations	30.806	71.0941	0.211257	0.131383
5'Flank Mutations*	1.9701	2.7522	-	-
Missense Mutations	273.746	700.651	0.302296	0.267699
Nonsense Mutations	29.403	103.019	0.214286	0.100529
RNA Mutations	8.8955	20.1398	0.162934	-
Silent Mutations	95.4328	224.785	0.264074	0.230185
Splice Region mutations*	6.9701	17.0053	-	-
Aneuploidy Score	14.7911	6.7634	0.239667	1
Fraction Genome Altered	0.4125	0.1861	0.136608	0.645583
SNV Neoantigens	139.388	330.841	0.305318	0.275662
Indel Neoantigens	98.2388	225.67	0.144554	-
Leukocyte Fraction	0.222	0.124	0.238126	-
Intratumor Heterogeneity	0.1536	0.1168	0.193135	0.420379
Proliferation Score	0.4215	0.4787	0.16663	0.384776
Wound Healing Score	0.1159	0.1508	0.230337	0.354473
Number of Segments (CNA)	7.7729	0.982	0.136959	0.411047
Homologous Recombination Defects	37.4925	22.067	0.228554	0.42549
TP53 Missense and No Mutations**	1.4925	0.5037	0.366566	0.288485
*: Marked correlations are not significant at p<0.001
**: TP53 Missense and No Mutations: binary score vector(1,2): 1: TP53 missense mutation, 2: TP53 wild type.
