# Supplementary material for: TP53mutation–associated and copy number–dependent KDM7A-DT expression affects DNA repair and promotes invasive breast cancer progression
Source: Research Square preprint supplement (doi:10.21203/rs.3.rs-1896103/v3), 2022-09-27
Supplement: Supplementary file 12 [file 8433b5172a76855c447bc652.xlsx]

## Sheet: ST12
Table S12. Annotation of the proteins whose expresion was significantly correlated with KDM7A-DT expression.
Gene Symbol	Ensembl ID	Protein	Definition
ACACA	ENSP00000483300	ACC1	Acetyl-CoA carboxylase 1
ACVRL1	ENSP00000373574	ACVRL1	Serine/threonine-protein kinase receptor R3
AKT3	ENSP00000263826	Akt	RAC-gamma serine/threonine-protein kinase
ANXA1	ENSP00000366109	Annexin-1	Annexin A1
AR	ENSP00000363822	AR	Androgen receptor
ARID1A	ENSP00000320485	ARID1A	AT-rich interactive domain-containing protein 1A
BAX	ENSP00000293288	Bax	Apoptosis regulator BAX
BCL2	ENSP00000381185	Bcl-2	Apoptosis regulator Bcl-2
BCL2L11	ENSP00000376943	Bim	Bcl-2-like protein 11
CCNE1	ENSP00000262643	Cyclin_E1	G1/S-specific cyclin-E1
CDH3	ENSP00000264012	P-Cadherin	Cadherin-3
CDKN1B	ENSP00000228872	p27	Cyclin-dependent kinase inhibitor 1B
CHEK1	ENSP00000388648	Chk1	Serine/threonine-protein kinase Chk1
EGFR	ENSP00000275493	EGFR	Epidermal growth factor receptor
ERBB3	ENSP00000267101	HER3	Receptor tyrosine-protein kinase erbB-3
ESR1	ENSP00000405330	ER-alpha	Estrogen receptor
ETS1	ENSP00000376436	ETS-1	Ets proto-oncogene 1, transcription factor
G6PD	ENSP00000377192	G6PD	Glucose-6-phosphate 1-dehydrogenase
GATA3	ENSP00000368632	GATA3	Trans-acting T-cell-specific transcription factor GATA-3
INPP4B	ENSP00000425487	INPP4B	Type II inositol 3,4-bisphosphate 4-phosphatase
IRS1	ENSP00000304895	IRS1	Insulin receptor substrate 1
KIT	ENSP00000288135	c-Kit	Mast/stem cell growth factor receptor Kit
LCK	ENSP00000337825	Lck	Tyrosine-protein kinase Lck
MAPK9	ENSP00000394560	JNK2	Mitogen-activated protein kinase 8/9/10 (c-jun n-terminal kinase)
NOTCH1	ENSP00000277541	Notch1	Neurogenic locus notch homolog protein 1
PGR	ENSP00000325120	PR	Progesterone receptor
PRDX1	ENSP00000262746	PRDX1	Peroxiredoxin-1
PREX1	ENSP00000361009	PREX1	Phosphatidylinositol 3,4,5-trisphosphate-dependent Rac exchanger 1 protein
PRKCA	ENSP00000408695	PKC-alpha	Protein kinase C alpha type
RAD50	ENSP00000368100	Rad50	DNA repair protein RAD50
RAD51	ENSP00000372088	Rad51	DNA repair protein RAD51 homolog 1
RICTOR	ENSP00000296782	Rictor	Rapamycin-insensitive companion of mTOR
RPS6KB1	ENSP00000225577	p70S6K	Ribosomal protein S6 kinase beta-1
RPTOR	ENSP00000307272	Raptor	Regulatory-associated protein of mTOR
SMAD3	ENSP00000332973	Smad3	Mothers against decapentaplegic homolog 3
SRC	ENSP00000362680	Src	Proto-oncogene tyrosine-protein kinase Src
STMN1	ENSP00000410452	Stathmin	Stathmin
TFRC	ENSP00000353224	TFRC	Transferrin receptor protein 1
TGM2	ENSP00000355330	Transglutaminase	Protein-glutamine gamma-glutamyltransferase 2
TIGAR	ENSP00000179259	TIGAR	Fructose-2,6-bisphosphatase TIGAR
TP53BP1	ENSP00000371475	53BP1	TP53-binding protein 1
WWTR1	ENSP00000419465	TAZ	WW domain-containing transcription regulator protein 1
XRCC1	ENSP00000262887	XRCC1	X-ray repair cross complementing 1
XRCC5	ENSP00000375978	Ku80	X-ray repair cross-complementing protein 5
YAP1	ENSP00000478927	YAP	Yes1 associated transcriptional regulator
YWHAZ	ENSP00000379287	14-3-3_zeta	14-3-3 protein zeta/delta
