# Supplementary material for: TP53mutation–associated and copy number–dependent KDM7A-DT expression affects DNA repair and promotes invasive breast cancer progression
Source: Research Square preprint supplement (doi:10.21203/rs.3.rs-1896103/v3), 2022-09-27
Supplement: Supplementary file 13 [file 86174b6025266e6d160c1f5f.xlsx]

## Sheet: ST16
Table S16. Spearman correlation coefficients of the gene expression levels positively and negativly Correlated with KDM7A-DT RNA. Breast cancer. TCGA data.
cut-off p<0.0004; q<0.001	Positive Correlated RNA	Cytoband	Spearman's Correlation	p-Value	q-Value		Negative Correlated RNA	Cytoband	Spearman's Correlation	p-Value	q-Value
	KDM7A	7q34	0.659441	1.67717e-98	3.35853e-94		BCL2	18q21.33	-0.499733	1.64026e-50	1.64231e-46
	KRT7	12q13.13	0.472524	1.23923e-44	6.20392e-41		GATA3	10p14	-0.47435	5.18688e-45	3.46224e-41
	INAVA	1q32.1	0.454554	4.95456e-41	1.24019e-37		DNAJC12	10q21.3	-0.468833	7.08657e-44	2.83817e-40
	PSCA	8q24.3	0.443665	5.9611e-39	1.08519e-35		WNT3	17q21.31-q21.32	-0.460364	3.57865e-42	1.19438e-38
	VGLL1	Xq26.3	0.442328	1.06077e-38	1.77016e-35		AFF3	2q11.2	-0.456647	1.93341e-41	5.53094e-38
	CD82	11p11.2	0.440667	2.16266e-38	3.33133e-35		TLE3	15q23	-0.449752	4.18454e-40	9.31059e-37
	S100A11	1q21.3	0.435636	1.82646e-37	2.15146e-34		ARSG	17q24.2	-0.447042	1.37463e-39	2.7527e-36
	GRAMD2A	15q23	0.433872	3.82805e-37	4.2587e-34		DACH1	13q21.33	-0.43762	7.90879e-38	1.13124e-34
	CHRM1	11q12.3	0.432578	6.56829e-37	6.5765e-34		RGS22	8q22.2	-0.436346	1.35467e-37	1.80849e-34
	PADI2	1p36.13	0.431872	8.80809e-37	8.39914e-34		ZNF396	18q12.2	-0.435894	1.63866e-37	2.05088e-34
	MPZL2	11q23.3	0.431165	1.1809e-36	1.07488e-33		PCSK6	15q26.3	-0.432941	5.64652e-37	5.95114e-34
	TRPV6	7q34	0.425809	1.06523e-35	7.5589e-33		ZNF24	18q12.2	-0.430604	1.48993e-36	1.29721e-33
	ACE2	Xp22.2	0.425069	1.43908e-35	9.60587e-33		SLC27A2	15q21.2	-0.428225	3.96963e-36	3.31216e-33
	HILPDA	7q32.1	0.424874	1.55723e-35	1.00592e-32		HDGFL3	15q25.2	-0.426368	8.48285e-36	6.79477e-33
	GSDMC	8q24.21	0.42454	1.78344e-35	1.11604e-32		WDR17	4q34.2	-0.426132	9.33932e-36	7.19308e-33
	MEAK7	16q24.1	0.423625	2.58194e-35	1.54345e-32		RIC8B	12q23.3	-0.425867	1.04018e-35	7.5589e-33
	SDC1	2p24.1	0.423589	2.62059e-35	1.54345e-32		LONRF2	2q11.2	-0.425742	1.09467e-35	7.5589e-33
	FUT3	19p13.3	0.423215	3.04711e-35	1.74338e-32		THSD4	15q23	-0.421258	6.69342e-35	3.72322e-32
	VSTM2L	20q11.23	0.41788	2.57194e-34	1.39198e-31		BRD8	5q31.2	-0.416723	4.06521e-34	2.14226e-31
	A2ML1	12p13.31	0.416287	4.82782e-34	2.4789e-31		WDR19	4p14	-0.41549	6.60716e-34	3.22704e-31
	TMEM123	11q22.2	0.416018	5.36608e-34	2.68639e-31		MED13L	12q24.21	-0.414043	1.16502e-33	5.42549e-31
	UMODL1-AS1	21q22.3	0.41491	8.29421e-34	3.95456e-31		TMPRSS6	22q12.3	-0.413861	1.25117e-33	5.69423e-31
	NFIL3	9q22.31	0.413267	1.57762e-33	6.86781e-31		TBC1D9	4q31.21	-0.413802	1.28027e-33	5.69722e-31
	SILC1	2p25.2	0.413165	1.64173e-33	6.99482e-31		CCND1	11q13.3	-0.411215	3.50317e-33	1.43165e-30
	PXDC1	6p25.2	0.411566	3.05734e-33	1.27548e-30		ICA1L	2q33.2	-0.409995	5.61405e-33	2.16195e-30
	SPNS2	17p13.2	0.41105	3.73499e-33	1.48382e-30		FSIP1	15q14	-0.405715	2.89252e-32	1.06469e-29
	MAB21L4	2q37.3	0.411019	3.77902e-33	1.48382e-30		IGF1R	15q26.3	-0.40338	7.00419e-32	2.46068e-29
	SMCO4	11q21	0.406559	2.0973e-32	7.92424e-30		DCTN4	5q33.1	-0.402007	1.17442e-31	3.83304e-29
	RCAN1	21q22.12	0.405687	2.92423e-32	1.06469e-29		LDLRAD3	11p13	-0.401692	1.32164e-31	4.20093e-29
	SLC15A1	13q32.2-q32.3	0.404316	4.91773e-32	1.75853e-29		ZNF516	18q23	-0.401489	1.42621e-31	4.46248e-29
	ACTB	7p22.1	0.403262	7.32318e-32	2.52839e-29		CSNK1G3	5q23.2	-0.400936	1.75466e-31	5.40572e-29
	MSL3	Xp22.2	0.402476	9.84829e-32	3.34257e-29		SLC39A6	18q12.2	-0.400271	2.24987e-31	6.74072e-29
	LCN2	9q34.11	0.402317	1.04538e-31	3.48897e-29		GNPDA2	4p12	-0.400264	2.25532e-31	6.74072e-29
	NXPH4	12q13.3	0.401979	1.18676e-31	3.83304e-29		MYT1	20q13.33	-0.398714	4.01634e-31	1.16151e-28
	LGALS3	14q22.3	0.399444	3.06198e-31	9.01708e-29		GIN1	5q21.1	-0.398685	4.06021e-31	1.16151e-28
	DTX2	7q11.23	0.397772	5.69571e-31	1.58412e-28		RERG	12p12.3	-0.397901	5.42871e-31	1.53112e-28
	AKR1B15	7q33	0.397471	6.36645e-31	1.74641e-28		ZXDB	Xp11.21	-0.396523	9.03394e-31	2.41206e-28
	NCCRP1	19q13.2	0.396612	8.74013e-31	2.36515e-28		TPRG1	3q28	-0.393631	2.60848e-30	6.52936e-28
	ASS1	9q34.11	0.396069	1.06754e-30	2.81284e-28		TMEM161B	5q14.3	-0.393508	2.72801e-30	6.74425e-28
	USB1	16q21	0.395891	1.13978e-30	2.96417e-28		DELE1	5q31.3	-0.393151	3.10739e-30	7.58847e-28
	SLURP1	8q24.3	0.395818	1.17101e-30	3.00635e-28		ESR1	6q25.1-q25.2	-0.393035	3.24223e-30	7.82236e-28
	CCDC71L	7q22.3	0.394473	1.91762e-30	4.86079e-28		DBNDD2	20q13.12	-0.391763	5.14617e-30	1.22275e-27
	TLE1	9q21.32	0.39174	5.19018e-30	1.22275e-27		PLCD4	2q35	-0.389051	1.36952e-29	3.11643e-27
	DBI	2q14.2	0.39058	7.89581e-30	1.83853e-27		GATA3-AS1	10p14	-0.388732	1.53552e-29	3.45493e-27
	B3GNT3	19p13.11	0.389736	1.0704e-29	2.46376e-27		ASB16	17q21.31	-0.386004	4.06844e-29	9.05227e-27
	TTC7A	2p21	0.385904	4.21486e-29	9.26584e-27		MINDY1	1q21.3	-0.384944	5.92489e-29	1.27576e-26
	BACE2	21q22.2-q22.3	0.385876	4.25696e-29	9.26584e-27		APH1B	15q22.2	-0.384457	7.04039e-29	1.49352e-26
	DCAF4	14q24.2	0.384439	7.08536e-29	1.49352e-26		SLC16A6	17q24.2	-0.383766	8.98411e-29	1.87403e-26
	SCPEP1	17q22	0.383426	1.01288e-28	2.09103e-26		CST9	20p11.21	-0.381364	2.08903e-28	4.26866e-26
	MID1	Xp22	0.379138	4.53739e-28	8.82148e-26		ELP2	18q12.2	-0.381335	2.11044e-28	4.26884e-26
	HSD17B2	16q23.3	0.378803	5.09599e-28	9.71878e-26		CPLX1	4p16.3	-0.380579	2.74801e-28	5.50288e-26
	CALML5	10p15.1	0.378614	5.44158e-28	1.02197e-25		NUDT12	5q21.2	-0.379803	3.6007e-28	7.13901e-26
	S100A9	1q21.3	0.378603	5.46072e-28	1.02197e-25		KLHL42	12p11.22	-0.379354	4.20839e-28	8.26206e-26
	HEBP2	6q24.1	0.378462	5.73407e-28	1.06319e-25		PGBD1	6p22.1	-0.379001	4.75739e-28	9.16027e-26
	REXO2	11q23.2	0.377323	8.50057e-28	1.56169e-25		MTX3	5q14.1	-0.37511	1.81849e-27	3.28065e-25
	ATP6V1C2	2p25.1	0.376386	1.17395e-27	2.13712e-25		RETREG1	5p15.1	-0.374991	1.894e-27	3.38636e-25
	SRD5A1	5p15.31	0.374585	2.17588e-27	3.85593e-25		DNALI1	1p34.3	-0.374304	2.39486e-27	4.17019e-25
	STK38	6p21.31	0.374518	2.22602e-27	3.91018e-25		DTX3	12q13.3	-0.374212	2.47111e-27	4.26586e-25
	PERP	6q23.3	0.373905	2.74453e-27	4.69736e-25		SLC22A5	5q31.1	-0.373698	2.94442e-27	4.99677e-25
	RIPK4	21q22.3	0.373548	3.09919e-27	5.21523e-25		FAAH2	Xp11.21	-0.373158	3.53878e-27	5.90534e-25
	POR	7q11.23	0.372992	3.74382e-27	6.14508e-25		KCNJ3	2q24.1	-0.373055	3.66432e-27	6.0643e-25
	KRT86	12q13	0.371853	5.50776e-27	8.89458e-25		SMARCC2	12q13.2	-0.372095	5.07429e-27	8.2612e-25
	RARRES1	3q25.32	0.37155	6.10236e-27	9.77599e-25		POLI	18q21.2	-0.370921	7.54594e-27	1.18982e-24
	SOD3	4p15.2	0.370997	7.35678e-27	1.1692e-24		C5AR2	19q13.32	-0.370305	9.28776e-27	1.43067e-24
	NANOS1	10q26.11	0.370728	8.05494e-27	1.26016e-24		P4HTM	3p21.31	-0.368932	1.47238e-26	2.20032e-24
	PROM1	4p15.32	0.370438	8.88052e-27	1.37855e-24		SLC45A1	1p36.23	-0.368885	1.49587e-26	2.21887e-24
	CLIC3	9q34.3	0.370156	9.76533e-27	1.49275e-24		MYEF2	15q21.1	-0.368666	1.60995e-26	2.37053e-24
	EFNA4	1q21.3	0.370019	1.02257e-26	1.55129e-24		HDHD2	18q21.1	-0.367511	2.36727e-26	3.38605e-24
	TTYH3	7p22.3	0.36977	1.11165e-26	1.67374e-24		C9ORF64	9q21.32	-0.367306	2.5345e-26	3.59953e-24
	TMSB10	2p11.2	0.368569	1.6627e-26	2.43034e-24		RABEP1	17p13.2	-0.365551	4.5391e-26	6.26866e-24
	USP6NL	10p14	0.368542	1.67763e-26	2.43439e-24		FBXL17	5q21.3	-0.365011	5.42593e-26	7.39145e-24
	EHD1	11q13.1	0.367948	2.04619e-26	2.94784e-24		KDM4B	19p13.3	-0.364584	6.24673e-26	8.33938e-24
	ADGRG6	6q24.2	0.366586	3.22015e-26	4.5411e-24		KIF12	9q32	-0.364415	6.60465e-26	8.75882e-24
	S100A8	1q21.3	0.36633	3.50572e-26	4.90923e-24		DIS3L	15q22.31	-0.364196	7.09904e-26	9.35251e-24
	KLRG2	7q34	0.36622	3.63586e-26	5.05611e-24		MAP3K12	12q13.13	-0.36362	8.58099e-26	1.10861e-23
	SVOPL	7q34	0.365195	5.10593e-26	7.00317e-24		CHST10	2q11.2	-0.361733	1.59235e-25	1.99293e-23
	ARL4C	2q37.1	0.364976	5.4898e-26	7.42792e-24		ACADSB	10q26.13	-0.36142	1.76333e-25	2.1663e-23
	NHSL1	6q24.1	0.364683	6.04544e-26	8.12483e-24		CPB1	3q24	-0.360762	2.18486e-25	2.6678e-23
	SYTL3	6q25.3	0.364166	7.171e-26	9.38557e-24		ARMT1	6q25.1	-0.35912	3.72272e-25	4.41109e-23
	LIMK1	7q11.23	0.364087	7.35863e-26	9.56861e-24		ZNF214	11p15.4	-0.358923	3.96675e-25	4.6726e-23
	LGMN	14q32.12	0.363438	9.11053e-26	1.16948e-23		NBR1	17q21.31	-0.357927	5.47067e-25	6.36919e-23
	KRT4	12q13.13	0.362814	1.11791e-25	1.42587e-23		ANKRA2	5q13.2	-0.357519	6.23923e-25	7.18049e-23
	GLYATL2	11q12.1	0.362763	1.13671e-25	1.44067e-23		CDK17	12q23.1	-0.357083	7.1764e-25	8.21186e-23
	NAMPT	7q22.3	0.36218	1.37579e-25	1.73271e-23		BBS1	11q13.2	-0.355548	1.17333e-24	1.31262e-22
	ST8SIA1	12p12.1	0.361515	1.70956e-25	2.11778e-23		GLRB	4q32.1	-0.355009	1.39367e-24	1.54189e-22
	PSAT1	9q21.2	0.361509	1.71326e-25	2.11778e-23		TCTN1	12q24.11	-0.354742	1.5173e-24	1.66033e-22
	NRBP1	2p23.3	0.360473	2.40059e-25	2.91344e-23		CLSTN2	3q23	-0.35456	1.6081e-24	1.74065e-22
	SBSN	19q13.12	0.359549	3.23949e-25	3.90788e-23		CPEB2	4p15.32	-0.354158	1.82738e-24	1.96375e-22
	RASAL1	12q24.13	0.359442	3.35372e-25	4.02145e-23		NOVA1	14q12	-0.354147	1.83381e-24	1.96375e-22
	LINC00964	8q24.13	0.359147	3.69004e-25	4.39839e-23		RAD17	5q13.2	-0.353811	2.04035e-24	2.1733e-22
	UBE2E3	2q31.3	0.358261	4.91208e-25	5.7523e-23		NKAIN1	1p35.2	-0.352489	3.10108e-24	3.25127e-22
	ST14	11q24.3	0.357865	5.58079e-25	6.45984e-23		CFAP91	3q13.33	-0.35185	3.7933e-24	3.93579e-22
	SLPI	20q13.12	0.356946	7.49942e-25	8.53272e-23		DUBR	3q13.12	-0.351595	4.11141e-24	4.23566e-22
	AIF1L	9q34.12-q34.13	0.356805	7.8462e-25	8.87685e-23		ZKSCAN2	16p12.1	-0.351344	4.4497e-24	4.52311e-22
	IDH2	15q26.1	0.356528	8.57667e-25	9.64876e-23		FBXO3	11p13	-0.350179	6.4136e-24	6.45388e-22
	CP	3q24-q25.1	0.355324	1.26042e-24	1.40222e-22		MRPS30	5p12	-0.349834	7.14587e-24	7.11921e-22
	UGT2B7	4q13.2	0.354882	1.45136e-24	1.5969e-22		GLS2	12q13.3	-0.349803	7.21567e-24	7.15316e-22
	ADM	11p15.4	0.354707	1.53433e-24	1.66983e-22		RMND1	6q25.1	-0.349625	7.62953e-24	7.52617e-22
	NUDT8	11q13.2	0.353445	2.29104e-24	2.42742e-22		MAST4	5q12.3	-0.34959	7.71341e-24	7.57162e-22
	CEBPB	20q13.13	0.353217	2.46288e-24	2.59575e-22		PARD6B	20q13.13	-0.349255	8.56466e-24	8.32559e-22
	RAP2B	3q25.2	0.352445	3.14411e-24	3.27921e-22		CCDC158	4q21.1	-0.348724	1.01051e-23	9.68205e-22
	PPARD	6p21.31	0.351585	4.12461e-24	4.23566e-22		CCNDBP1	15q15.2	-0.348603	1.04933e-23	1.00061e-21
	NT5DC2	3p21.1	0.351468	4.27834e-24	4.37111e-22		INTU	4q28.1	-0.348004	1.26469e-23	1.20025e-21
	PGRMC1	Xq24	0.350859	5.18231e-24	5.2412e-22		MADD	11p11.2	-0.347838	1.33137e-23	1.25758e-21
	GLIPR2	9p13.3	0.350116	6.54126e-24	6.54944e-22		KANSL3	2q11.2	-0.347604	1.43203e-23	1.34002e-21
	PDIA6	2p25.1	0.349571	7.75772e-24	7.57797e-22		CTR9	11p15.4	-0.347221	1.61236e-23	1.49479e-21
	SLC43A3	11q12.1	0.349024	9.20324e-24	8.90314e-22		JADE2	5q31.1	-0.346338	2.11938e-23	1.94682e-21
	TMEM65	8q24.13	0.348864	9.67381e-24	9.31336e-22		ZNF776	19q13.43	-0.346154	2.24343e-23	2.05135e-21
	CNGA1	4p12	0.347635	1.41811e-23	1.33322e-21		DNAJC24	11p13	-0.346137	2.25465e-23	2.05224e-21
	UMODL1	21q22.3	0.347564	1.44963e-23	1.35018e-21		TTC39C	18q11.2	-0.346108	2.27534e-23	2.0617e-21
	PLCH1	3q25.31	0.347065	1.69225e-23	1.56162e-21		YTHDC2	5q22.2	-0.345814	2.49158e-23	2.20898e-21
	CPAMD8	19p13.11	0.346026	2.33387e-23	2.10522e-21		TRAM1L1	4q26	-0.345812	2.49303e-23	2.20898e-21
	NPC2	14q24.3	0.345863	2.45383e-23	2.19742e-21		CTC1	17p13.1	-0.345003	3.19802e-23	2.76036e-21
	SLC10A3	Xq28	0.345858	2.45804e-23	2.19742e-21		TCEAL1	Xq22.2	-0.344881	3.32003e-23	2.85337e-21
	PLOD1	1p36.22	0.345784	2.51453e-23	2.21821e-21		RELL1	4p14	-0.344678	3.53447e-23	2.99906e-21
	EGFL6	Xp22.2	0.345571	2.68475e-23	2.35799e-21		SCAMP1	5q14.1	-0.344174	4.12474e-23	3.45598e-21
	ACOT9	Xp22.11	0.345431	2.80363e-23	2.45164e-21		EFCAB7	1p31.3	-0.343814	4.6058e-23	3.84297e-21
	NCOA7	6q22.31-q22.32	0.345061	3.14146e-23	2.73512e-21		MACIR	5q21.1	-0.343506	5.061e-23	4.20525e-21
	MRPS6	21q22.11	0.345032	3.16951e-23	2.74759e-21		FBXL2	3p22.3	-0.343278	5.42672e-23	4.4905e-21
	LINC01006	7q36.3	0.344748	3.45859e-23	2.95976e-21		USP30	12q24.11	-0.342922	6.05038e-23	4.96553e-21
	TMEM40	3p25.2	0.344687	3.52473e-23	2.99906e-21		CCDC91	12p11.22	-0.342373	7.15303e-23	5.82274e-21
	B3GNT4	12q24.31	0.34448	3.75613e-23	3.17369e-21		ERBB4	2q34	-0.342159	7.63499e-23	6.1899e-21
	CYRIA	2p24.2	0.344212	4.07718e-23	3.43049e-21		MRTFB	16p13.12	-0.341897	8.26694e-23	6.64841e-21
	PDXK	21q22.3	0.342964	5.97383e-23	4.92288e-21		CHD1	5q15-q21.1	-0.341427	9.53788e-23	7.6094e-21
	BFSP1	20p12.1	0.342639	6.59611e-23	5.39131e-21		ARL14EP	11p14.1	-0.341404	9.60399e-23	7.63174e-21
	ENO1	1p36.23	0.342038	7.92009e-23	6.39516e-21		FOXA1	14q21.1	-0.341285	9.95549e-23	7.87979e-21
	MMP15	16q21	0.341694	8.79385e-23	7.04387e-21		PAH	12q23.2	-0.341271	9.99883e-23	7.88294e-21
	ATP13A5	3q29	0.340749	1.17135e-22	9.19853e-21		CCDC170	6q25.1	-0.340219	1.37506e-22	1.06727e-20
	RASD2	22q12.3	0.340465	1.27654e-22	9.98545e-21		UGCG	9q31.3	-0.339949	1.4918e-22	1.15341e-20
	MUC15	11p14.2	0.340422	1.29332e-22	1.00773e-20		PCBD2	5q31.1	-0.339848	1.53814e-22	1.18466e-20
	CSTB	21q22.3	0.3397	1.6082e-22	1.23388e-20		SREK1	5q12.3	-0.339423	1.74821e-22	1.32606e-20
	KMO	1q43	0.339543	1.68603e-22	1.28865e-20		AGBL2	11p11.2	-0.339235	1.85007e-22	1.39803e-20
	ALK	2p23.2-p23.1	0.339514	1.7009e-22	1.29508e-20		RNF14	5q31.3	-0.339116	1.91763e-22	1.44363e-20
	DPF3	14q24.2	0.337921	2.74591e-22	2.02903e-20		TAPT1	4p15.32	-0.339068	1.94577e-22	1.45427e-20
	ADGRF1	6p12.3	0.337856	2.79935e-22	2.06092e-20		PIEZO2	18p11.22-p11.21	-0.339067	1.94628e-22	1.45427e-20
	VPS37B	12q24.31	0.33775	2.89023e-22	2.12003e-20		COX6C	8q22.2	-0.338574	2.25684e-22	1.68004e-20
	PDP1	8q22.1	0.337703	2.93083e-22	2.14061e-20		PEX5L	3q26.33	-0.338126	2.58206e-22	1.91503e-20
	DKK1	10q21.1	0.337693	2.93966e-22	2.14061e-20		NME5	5q31.2	-0.337395	3.21377e-22	2.33173e-20
	EPHB6	7q34	0.33736	3.24822e-22	2.34551e-20		KAT6B	10q22.2	-0.337159	3.44917e-22	2.47562e-20
	CHI3L1	1q32.1	0.337351	3.25619e-22	2.34551e-20		C5ORF63	5q23.2	-0.337038	3.57554e-22	2.55715e-20
	GPRC5B	16p12.3	0.336469	4.2382e-22	2.99894e-20		LYPD6B	2q23.2	-0.33687	3.75949e-22	2.67914e-20
	RAET1G	6q25.1	0.336147	4.66375e-22	3.2769e-20		MSH3	5q14.1	-0.336754	3.89284e-22	2.76433e-20
	FANCD2OS	3p25.3	0.335839	5.11187e-22	3.56673e-20		ARNT2	15q25.1	-0.336429	4.28829e-22	3.0237e-20
	STRA8	7q33	0.335775	5.20993e-22	3.60999e-20		C11ORF58	11p15.2	-0.335878	5.05333e-22	3.53821e-20
	MYO1H	12q24.11	0.335468	5.70832e-22	3.92815e-20		TCTN2	12q24.31	-0.335811	5.15438e-22	3.5839e-20
	RILP	17p13.3	0.335319	5.96534e-22	4.07699e-20		CDON	11q24.2	-0.335583	5.51643e-22	3.80919e-20
	C1ORF198	1q42.2	0.335246	6.09767e-22	4.14046e-20		SEPSECS	4p15.2	-0.335397	5.83038e-22	3.99841e-20
	MRPL15	8q11.23	0.335241	6.10628e-22	4.14046e-20		GUF1	4p12	-0.335221	6.14297e-22	4.14185e-20
	KCNK5	6p21.2	0.335233	6.12023e-22	4.14046e-20		ZADH2	18q22.3	-0.335019	6.52124e-22	4.37239e-20
	CPA4	7q32.2	0.334932	6.69201e-22	4.46692e-20		SYBU	8q23.2	-0.335015	6.52856e-22	4.37239e-20
	NXN	17p13.3	0.334777	7.00605e-22	4.64557e-20		BBS4	15q24.1	-0.334842	6.87342e-22	4.57276e-20
	TMEM51	1p36.21	0.333996	8.82705e-22	5.75771e-20		CCNH	5q14.3	-0.334657	7.25927e-22	4.79759e-20
	NTAN1	16p13.11	0.333753	9.48295e-22	6.16546e-20		CLASP2	3p22.3	-0.334287	8.09894e-22	5.33491e-20
	HAPLN3	15q26.1	0.333638	9.81077e-22	6.35795e-20		BTRC	10q24.32	-0.334135	8.47268e-22	5.5628e-20
	UGP2	2p15	0.33338	1.05886e-21	6.75695e-20		TSG101	11p15.1	-0.33401	8.79145e-22	5.75323e-20
	AKR1E2	10p15.1	0.333377	1.05952e-21	6.75695e-20		SPTBN4	19q13.2	-0.333543	1.00905e-21	6.51815e-20
	EFNA3	1q21.3	0.332994	1.18607e-21	7.51613e-20		ZNF587	19q13.43	-0.333531	1.01255e-21	6.51969e-20
	MPHOSPH6	16q23.3	0.332759	1.27121e-21	7.97994e-20		ZNF236	18q23	-0.33339	1.05563e-21	6.75695e-20
	FAM20A	17q24.2	0.332658	1.3094e-21	8.194e-20		TP53BP1	15q15.3	-0.333081	1.1562e-21	7.3501e-20
	ZNRF1	16q23.1	0.332361	1.42861e-21	8.85691e-20		QDPR	4p15.32	-0.332828	1.24556e-21	7.8679e-20
	PDSS1	10p12.1	0.332285	1.46095e-21	9.02948e-20		LRRC49	15q23	-0.332817	1.24943e-21	7.8679e-20
	LY6E	8q24.3	0.332244	1.47879e-21	9.11163e-20		RALGAPA1	14q13.2	-0.332565	1.34581e-21	8.39558e-20
	FAM98A	2p22.3	0.332075	1.55406e-21	9.51686e-20		MRPS27	5q13.2	-0.332441	1.39567e-21	8.67962e-20
	SLC5A6	2p23.3	0.331996	1.59043e-21	9.70989e-20		CEP120	5q23.2	-0.332168	1.51226e-21	9.28925e-20
	RDH10	8q21.11	0.331911	1.63062e-21	9.92497e-20		BTF3	5q13.2	-0.331147	2.03907e-21	1.23361e-19
	RNF24	20p13	0.331278	1.96264e-21	1.19097e-19		FRY	13q13.1	-0.330818	2.24479e-21	1.34587e-19
	NCK2	2q12.2	0.331089	2.07419e-21	1.25107e-19		CDH7	18q22.1	-0.330799	2.25724e-21	1.34929e-19
	OPRK1	8q11.23	0.331056	2.09393e-21	1.25918e-19		RPRD1A	18q12.2	-0.330692	2.32921e-21	1.38817e-19
	RTN4IP1	6q21	0.330666	2.34651e-21	1.39433e-19		ULK2	17p11.2	-0.330536	2.4371e-21	1.43961e-19
	KIFC3	16q21	0.33059	2.39943e-21	1.42155e-19		NUMA1	11q13.4	-0.330274	2.63057e-21	1.54933e-19
	CLCN5	Xp11.23	0.329721	3.09013e-21	1.80407e-19		LRBA	4q31.3	-0.330086	2.77863e-21	1.63173e-19
	C15ORF39	15q24.2	0.329705	3.10449e-21	1.80719e-19		SPATA4	4q34.2	-0.330057	2.80214e-21	1.64073e-19
	WDR91	7q33	0.32951	3.28566e-21	1.89612e-19		DCLK1	13q13.3	-0.329661	3.14418e-21	1.82499e-19
	PITX1	5q31.1	0.328985	3.82677e-21	2.19573e-19		MBLAC2	5q14.3	-0.32956	3.23809e-21	1.87407e-19
	PDE7A	8q13.1	0.328259	4.72176e-21	2.68617e-19		SIN3A	15q24.2	-0.32923	3.56433e-21	2.05102e-19
	MRPS17	7p11.2	0.327626	5.66976e-21	3.21634e-19		C11ORF49	11p11.2	-0.328621	4.25263e-21	2.43311e-19
	PHGDH	1p12	0.327206	6.39947e-21	3.62004e-19		USP32	17q23.3	-0.328445	4.47444e-21	2.55273e-19
	PDIA4	7q36.1	0.327096	6.60467e-21	3.72559e-19		CAMLG	5q31.1	-0.326805	7.18164e-21	3.99479e-19
	RASGRF1	15q25.1	0.327003	6.78374e-21	3.81585e-19		SPATA41	15q26.3	-0.326687	7.42984e-21	4.1214e-19
	GRHL1	2p25.1	0.326895	6.99847e-21	3.92561e-19		SEZ6L	22q12.1	-0.326666	7.47477e-21	4.13487e-19
	RASGEF1B	4q21.21	0.326868	7.0528e-21	3.94504e-19		LMX1B	9q33.3	-0.326265	8.38832e-21	4.61473e-19
	TCF7L1	2p11.2	0.326811	7.17037e-21	3.99479e-19		SPEF2	5p13.2	-0.326161	8.64287e-21	4.74174e-19
	PBDC1	Xq13.3	0.326381	8.11272e-21	4.47541e-19		SPATA6L	9p24.2-p24.1	-0.324914	1.23494e-20	6.59457e-19
	ECE2	3q27.1	0.326047	8.9288e-21	4.88523e-19		MAGED2	Xp11.21	-0.324858	1.25472e-20	6.68237e-19
	NRBF2	10q21.3	0.325928	9.23884e-21	5.04108e-19		C2ORF15	2q11.2	-0.324663	1.32679e-20	7.02505e-19
	ITM2C	2q37.1	0.325893	9.33346e-21	5.07888e-19		AP2B1	17q12	-0.324143	1.53879e-20	8.06656e-19
	ABRACL	6q24.1	0.325861	9.41902e-21	5.11154e-19		MAG	19q13.1	-0.324112	1.55242e-20	8.10643e-19
	KRT23	17q21.2	0.325736	9.76041e-21	5.28249e-19		LYPD6	2q23.2	-0.324107	1.55449e-20	8.10643e-19
	SLC15A2	3q13.33	0.325353	1.08922e-20	5.87917e-19		MOAP1	14q32.12	-0.324077	1.56771e-20	8.15414e-19
	SMC1B	22q13.31	0.325215	1.13331e-20	6.1007e-19		CHD3	17p13.1	-0.32404	1.5844e-20	8.21958e-19
	CLCN4	Xp22.2	0.324959	1.21911e-20	6.54497e-19		EIF4B	12q13.13	-0.323941	1.62974e-20	8.43295e-19
	CRABP1	15q25.1	0.32492	1.23266e-20	6.59457e-19		FAM193A	4p16.3	-0.323843	1.67586e-20	8.64925e-19
	PPP1R14C	6q25.1	0.324778	1.28394e-20	6.81986e-19		FBXL5	4p15.32	-0.323381	1.91121e-20	9.83854e-19
	FAM118B	11q24.2	0.324655	1.32958e-20	7.02505e-19		METTL15	11p14.1	-0.323144	2.04425e-20	1.04163e-18
	B3GNT7	2q37.1	0.324358	1.44737e-20	7.62726e-19		RUNDC1	17q21.31	-0.322764	2.27628e-20	1.15107e-18
	HPDL	1p34.1	0.324325	1.46089e-20	7.67832e-19		DMXL1	5q23.1	-0.322604	2.38227e-20	1.19862e-18
	VASN	16p13.3	0.323233	1.99309e-20	1.02337e-18		IRS1	2q36.3	-0.322579	2.39903e-20	1.20403e-18
	PCP4L1	1q23.3	0.323178	2.02418e-20	1.03668e-18		LINC00908	18q23	-0.322379	2.53854e-20	1.27086e-18
	SUMO3	21q22.3	0.323148	2.04176e-20	1.04163e-18		ZSWIM5	1p34.1	-0.322325	2.57803e-20	1.28741e-18
	PDZK1IP1	1p33	0.322958	2.15487e-20	1.09521e-18		CST9L	20p11.21	-0.321727	3.05212e-20	1.51659e-18
	PRSS27	16p13.3	0.322786	2.26217e-20	1.14683e-18		POLK	5q13.3	-0.321505	3.24951e-20	1.60274e-18
	SLC52A2	8q24.3	0.322617	2.37325e-20	1.19709e-18		RPH3AL	17p13.3	-0.321441	3.3087e-20	1.62793e-18
	CBR3	21q22.12	0.322244	2.63776e-20	1.31396e-18		CHIC1	Xq13.2	-0.321392	3.35515e-20	1.64674e-18
	CDH3	16q22.1	0.3216	3.16401e-20	1.5683e-18		ZNF703	8p11.23	-0.321381	3.36502e-20	1.64754e-18
	GAREM1	18q12.1	0.321526	3.23056e-20	1.59733e-18		TRH	3q22.1	-0.321331	3.41284e-20	1.66283e-18
	DTNB	2p23.3	0.321333	3.41151e-20	1.66283e-18		MYO18B	22q12.1	-0.321214	3.52744e-20	1.71034e-18
	SCEL	13q22.3	0.3213	3.44256e-20	1.67323e-18		IGFALS	16p13.3	-0.321064	3.67932e-20	1.77111e-18
	MARCO	2q14.2	0.321183	3.55785e-20	1.72092e-18		C2CD5	12p12.1	-0.321055	3.68936e-20	1.77169e-18
	S100A10	1q21.3	0.32111	3.63276e-20	1.75291e-18		DOK7	4p16.3	-0.320683	4.09644e-20	1.94849e-18
	SLC30A3	2p23.3	0.32101	3.73595e-20	1.78977e-18		MAP9	4q32.1	-0.320661	4.12189e-20	1.95595e-18
	FBXO32	8q24.13	0.320998	3.74852e-20	1.79151e-18		BORCS7	10q24.32	-0.320219	4.6665e-20	2.19874e-18
	UPK2	11q23.3	0.320785	3.98002e-20	1.89762e-18		VPS39	15q15.1	-0.320189	4.7054e-20	2.21187e-18
	S1PR2	19p13.2	0.320637	4.14872e-20	1.96402e-18		RASEF	9q21.32	-0.320049	4.89399e-20	2.27912e-18
	C1ORF116	1q32.1	0.320258	4.61513e-20	2.17967e-18		TRIM23	5q12.3	-0.319922	5.07138e-20	2.35625e-18
	BRI3	7q21.3	0.320168	4.73375e-20	2.21998e-18		NAGS	17q21.31	-0.319766	5.29767e-20	2.43875e-18
	MICAL3	22q11.21	0.320132	4.78116e-20	2.23698e-18		TBC1D19	4p15.2	-0.319655	5.46487e-20	2.50995e-18
	PTK7	6p21.1	0.320102	4.82239e-20	2.25101e-18		BBS5	2q31.1	-0.319639	5.48922e-20	2.51537e-18
	OPN3	1q43	0.319887	5.12195e-20	2.37013e-18		PABIR2	Xq26.3	-0.319345	5.96087e-20	2.71287e-18
	CDK6	7q21.2	0.31988	5.13224e-20	2.37013e-18		LINC00173	12q24.22	-0.319267	6.09167e-20	2.76611e-18
	KDELR2	7p22.1	0.319876	5.13675e-20	2.37013e-18		CNNM3	2q11.2	-0.318854	6.83746e-20	3.08379e-18
	FTL	19q13.33	0.319512	5.68919e-20	2.60105e-18		MYOZ3	5q33.1	-0.318538	7.46749e-20	3.36037e-18
	IL17RE	3p25.3	0.319399	5.87156e-20	2.67831e-18		MLPH	2q37.3	-0.318434	7.68826e-20	3.45196e-18
	DTX4	11q12.1	0.319154	6.28827e-20	2.84893e-18		TMEM145	19q13.2	-0.318333	7.90614e-20	3.54184e-18
	SNX3	6q21	0.318957	6.64428e-20	3.00343e-18		PRKAR1A	17q24.2	-0.31817	8.27474e-20	3.6987e-18
	MET	7q31	0.318126	8.37634e-20	3.73577e-18		MATR3	5q31.2	-0.317753	9.29258e-20	4.1352e-18
	ELF5	11p13	0.317354	1.03822e-19	4.56929e-18		PHGR1	15q15.1	-0.317694	9.44535e-20	4.19386e-18
	SH2D2A	1q23.1	0.317325	1.04646e-19	4.58876e-18		SALL2	14q11.2	-0.317685	9.46941e-20	4.19524e-18
	KYNU	2q22.2	0.317319	1.04824e-19	4.58876e-18		ZFX	Xp22.11	-0.317554	9.82153e-20	4.34164e-18
	CTNNBIP1	1p36.22	0.317168	1.09322e-19	4.76946e-18		TYW3	1p31.1	-0.317396	1.02626e-19	4.52664e-18
	GALNT3	2q24.3	0.317103	1.11308e-19	4.84552e-18		TBC1D12	10q23.33	-0.317315	1.04951e-19	4.58876e-18
	YBX1	1p34.2	0.316136	1.45476e-19	6.1982e-18		SLC7A2	8p22	-0.316961	1.15782e-19	5.02934e-18
	TAX1BP3	17p13.2	0.316009	1.50674e-19	6.39246e-18		ARPP19	15q21.2	-0.316949	1.16171e-19	5.03535e-18
	MSL3P1	2q37.1	0.315958	1.52787e-19	6.45602e-18		RBM11	21q11.2	-0.316923	1.16993e-19	5.06e-18
	PLIN2	9p22.1	0.315958	1.52817e-19	6.45602e-18		BECN1	17q21.31	-0.316748	1.22816e-19	5.30039e-18
	SLC6A14	Xq23	0.315906	1.55029e-19	6.53569e-18		TRAPPC13	5q12.3	-0.316478	1.32339e-19	5.69913e-18
	TRPM8	2q37.1	0.315819	1.58788e-19	6.68012e-18		FBXO21	12q24.22	-0.316446	1.33509e-19	5.73715e-18
	PLEKHA8P1	12q12	0.315775	1.60735e-19	6.74784e-18		ADD1	4p16.3	-0.316354	1.36958e-19	5.87278e-18
	B4GALT5	20q13.13	0.315334	1.81511e-19	7.5724e-18		MAPT	17q21.31	-0.316244	1.41203e-19	6.04185e-18
	CIB2	15q25.1	0.315088	1.9423e-19	8.06942e-18		CFAP61	20p11.23	-0.316154	1.44758e-19	6.18076e-18
	ZNF503-AS2	10q22.2	0.315039	1.96876e-19	8.1624e-18		TRAK1	3p22.1	-0.316111	1.46487e-19	6.22804e-18
	NOD1	7p14.3	0.314993	1.99398e-19	8.24987e-18		ABI2	2q33.2	-0.315691	1.64516e-19	6.8921e-18
	SLC37A3	7q34	0.3149	2.04537e-19	8.39994e-18		ZFYVE27	10q24.2	-0.315652	1.66294e-19	6.95205e-18
	PLD1	3q26.31	0.314148	2.51492e-19	1.0246e-17		FBXO38	5q32	-0.315261	1.85199e-19	7.71023e-18
	FAM3D	3p14.2	0.314144	2.51737e-19	1.0246e-17		MAPT-IT1	17q21.31	-0.314978	2.00212e-19	8.26648e-18
	GGCT	7p14.3	0.314087	2.55725e-19	1.03872e-17		KBTBD4	11p11.2	-0.314965	2.00904e-19	8.278e-18
	CLDN14	21q22.13	0.314063	2.5741e-19	1.04345e-17		ITPR1	3p26.1	-0.314897	2.04703e-19	8.39994e-18
	GRAMD2B	5q23.2	0.313638	2.89149e-19	1.16215e-17		FAR1	11p15.3	-0.314841	2.07905e-19	8.51389e-18
	FLVCR2	14q24.3	0.313633	2.89595e-19	1.16215e-17		FSD1L	9q31.2	-0.314416	2.33627e-19	9.5477e-18
	CNN2	19p13.3	0.313433	3.05909e-19	1.22517e-17		BBS12	4q27	-0.313933	2.66743e-19	1.0791e-17
	MALL	2q13	0.313403	3.08359e-19	1.23251e-17		MDM1	12q15	-0.313796	2.76948e-19	1.11812e-17
	PTTG1IP	21q22.3	0.313225	3.23776e-19	1.28885e-17		NUDT16L2P	3q22.1	-0.313733	2.81777e-19	1.13533e-17
	IFRD1	7q31.1	0.313184	3.2746e-19	1.29337e-17		BAIAP2-DT	17q25.3	-0.313347	3.13183e-19	1.2493e-17
	RRBP1	20p12.1	0.312741	3.69506e-19	1.45085e-17		CAMTA2	17p13.2	-0.313212	3.24937e-19	1.28885e-17
	PPP2R3A	3q22.2-q22.3	0.3126	3.83998e-19	1.50481e-17		EPHA10	1p34.3	-0.313211	3.25029e-19	1.28885e-17
	RNASEH1	2p25.3	0.312498	3.94777e-19	1.54101e-17		MPP2	17q21.31	-0.313199	3.26097e-19	1.29053e-17
	KCNG1	20q13.13	0.312386	4.07018e-19	1.58571e-17		IMPACT	18q11.2	-0.312853	3.58439e-19	1.41294e-17
	EPOP	17q12	0.312262	4.21012e-19	1.63704e-17		ATXN2	12q24.12	-0.312828	3.60845e-19	1.41963e-17
	SPINK8	3p21.31	0.312227	4.25064e-19	1.64589e-17		FANCF	11p14.3	-0.312525	3.91921e-19	1.53285e-17
	DCUN1D5	11q22.3	0.311704	4.90038e-19	1.87629e-17		KIAA0753	17p13.1	-0.312223	4.25601e-19	1.64589e-17
	B3GAT1	11q25	0.311696	4.91071e-19	1.87666e-17		SETBP1	18q12.3	-0.312221	4.25753e-19	1.64589e-17
	HMGA1	6p21.31	0.311546	5.11594e-19	1.95136e-17		GLI3	7p14.1	-0.312061	4.44778e-19	1.71612e-17
	ULBP2	6q25.1	0.311251	5.54218e-19	2.10592e-17		UBE3A	15q11.2	-0.311998	4.52381e-19	1.7421e-17
	TES	7q31.2	0.310812	6.24288e-19	2.35431e-17		ICE2	15q22.2	-0.311897	4.65021e-19	1.78734e-17
	IL22RA2	6q23.3	0.310791	6.27705e-19	2.36274e-17		SKP1	5q31.1	-0.311768	4.81555e-19	1.84734e-17
	MPC1	6q27	0.310767	6.31796e-19	2.37368e-17		OCIAD1	4p11	-0.311532	5.13494e-19	1.95489e-17
	NABP1	2q32.3	0.310683	6.46402e-19	2.42401e-17		ZNF721	4p16.3	-0.311179	5.65201e-19	2.14359e-17
	PLTP	20q13.12	0.310391	6.99527e-19	2.60372e-17		SFXN1	5q35.2	-0.311095	5.78191e-19	2.18871e-17
	MFAP3L	4q33	0.310382	7.01239e-19	2.60525e-17		AGTR1	3q24	-0.310912	6.07584e-19	2.29563e-17
	SLC31A1	9q32	0.310096	7.57618e-19	2.80431e-17		PER2	2q37.3	-0.31059	6.62916e-19	2.48129e-17
	LINC01634	22q11.21	0.309905	7.97701e-19	2.94723e-17		C5ORF24	5q31.1	-0.310581	6.64481e-19	2.4825e-17
	MTRES1	6q21	0.309858	8.07909e-19	2.97386e-17		FBXO36	2q36.3	-0.310457	6.87084e-19	2.56217e-17
	NMI	2q23.3	0.309851	8.09366e-19	2.97386e-17		NPEPPS	17q21.32	-0.310362	7.05134e-19	2.61487e-17
	LRIG3	12q14.1	0.309513	8.86668e-19	3.22828e-17		GLCE	15q23	-0.309852	8.09153e-19	2.97386e-17
	TINCR	19p13.3	0.309235	9.55628e-19	3.45423e-17		IFT88	13q12.11	-0.30967	8.49872e-19	3.11697e-17
	IL10RB	21q22.11	0.309207	9.62849e-19	3.47406e-17		TMEM26	10q21.2	-0.309614	8.62838e-19	3.15874e-17
	TLR9	3p21.2	0.309153	9.7676e-19	3.51792e-17		PCM1	8p22	-0.309591	8.68058e-19	3.17205e-17
	C1QL2	2q14.2	0.308977	1.02422e-18	3.67562e-17		SYNGAP1	6p21.32	-0.30952	8.84938e-19	3.22785e-17
	ADCY2	5p15.31	0.308956	1.03008e-18	3.69006e-17		ARL3	10q24.32	-0.309498	8.90269e-19	3.23551e-17
	AQP9	15q21.3	0.308945	1.03302e-18	3.69396e-17		XBP1	22q12.1	-0.309429	9.07013e-19	3.29039e-17
	ASCL2	11p15.5	0.308597	1.13441e-18	4.04209e-17		COQ10A	12q13.3	-0.309348	9.27028e-19	3.35692e-17
	CMC2	16q23.2	0.308514	1.15991e-18	4.1183e-17		IQCH	15q23	-0.309006	1.01639e-18	3.65407e-17
	FZD9	7q11.23	0.30843	1.18627e-18	4.20445e-17		MIGA1	1p31.1	-0.308877	1.05208e-18	3.75542e-17
	BCL2A1	15q25.1	0.308359	1.20922e-18	4.27821e-17		KIAA0232	4p16.1	-0.308564	1.14452e-18	4.07089e-17
	SPSB1	1p36.22	0.308222	1.25426e-18	4.42973e-17		PRRT2	16p11.2	-0.30812	1.28929e-18	4.54544e-17
	TNFRSF21	6p12.3	0.307882	1.37415e-18	4.81073e-17		CEP290	12q21.32	-0.308094	1.29811e-18	4.5685e-17
	SLC2A12	6q23.2	0.307779	1.41264e-18	4.93683e-17		CRACR2A	12p13.32	-0.308033	1.31951e-18	4.63563e-17
	GFUS	8q24.3	0.307645	1.46401e-18	5.10745e-17		DNAAF4	15q21.3	-0.308026	1.32194e-18	4.63606e-17
	TMPRSS2	21q22.3	0.307502	1.52127e-18	5.29801e-17		ZNF620	3p22.1	-0.307445	1.54434e-18	5.35968e-17
	PITPNM3	17p13.2-p13.1	0.307457	1.53975e-18	5.35305e-17		ABCC8	11p15.1	-0.307134	1.6784e-18	5.78486e-17
	IFI30	19p13.11	0.307428	1.55159e-18	5.37555e-17		PARD6G-AS1	18q23	-0.306762	1.85326e-18	6.32223e-17
	POU2F2	19q13.2	0.307264	1.62124e-18	5.60713e-17		CACNA2D2	3p21.31	-0.306565	1.9535e-18	6.65285e-17
	PDZD2	5p13.3	0.307201	1.64853e-18	5.69171e-17		IQSEC2	Xp11.22	-0.306477	1.99968e-18	6.7951e-17
	PLAUR	19q13	0.307125	1.68221e-18	5.78801e-17		CYP2B6	19q13.2	-0.306276	2.10974e-18	7.10043e-17
	KRT16	17q21.2	0.307006	1.73674e-18	5.96538e-17		MYB	6q23.3	-0.306214	2.14492e-18	7.20672e-17
	PPP1R14B	11q13.1	0.306913	1.7804e-18	6.10488e-17		SLC30A9	4p13	-0.30529	2.74118e-18	9.11829e-17
	RAB20	13q34	0.306799	1.83519e-18	6.282e-17		POC5	5q13.3	-0.305234	2.78203e-18	9.22353e-17
	CREB3L2	7q33	0.306766	1.85142e-18	6.32223e-17		TMC4	19q13.42	-0.305205	2.8034e-18	9.25695e-17
	GPNMB	7p15.3	0.306473	2.00205e-18	6.7951e-17		CCDC103	17q21.31	-0.305202	2.80598e-18	9.25695e-17
	ACY3	11q13.2	0.30641	2.03571e-18	6.89764e-17		FAM86B3P	8p23.1	-0.305154	2.84182e-18	9.3444e-17
	EN1	2q14.2	0.306373	2.05606e-18	6.95485e-17		LAMA3	18q11.2	-0.304985	2.97164e-18	9.72031e-17
	COTL1	16q24.1	0.306354	2.06617e-18	6.97725e-17		NEURL1	10q24.33	-0.304933	3.01311e-18	9.81096e-17
	LAD1	1q32.1	0.306335	2.07681e-18	7.00135e-17		ALG10B	12q12	-0.304551	3.33397e-18	1.08381e-16
	ARHGEF4	2q21.1	0.306102	2.20957e-18	7.41149e-17		PHOSPHO2	2q31.1	-0.304395	3.47438e-18	1.12036e-16
	LIMK2	22q12.2	0.305996	2.27298e-18	7.60437e-17		PPIP5K1	15q15.3	-0.304133	3.72302e-18	1.19861e-16
	DCLK2	4q31.23-q31.3	0.305993	2.27466e-18	7.60437e-17		SERPINA11	14q32.13	-0.303975	3.88102e-18	1.242e-16
	SLC31A2	9q32	0.305861	2.35583e-18	7.86259e-17		FAM102B	1p13.3	-0.303875	3.98492e-18	1.27067e-16
	IL4I1	19q13.33	0.305682	2.47077e-18	8.23249e-17		LANCL1	2q34	-0.303666	4.2103e-18	1.33615e-16
	KRT40	17q21.2	0.305251	2.76998e-18	9.19881e-17		SLTM	15q22.1	-0.303555	4.3357e-18	1.36944e-16
	ST6GAL1	3q27.3	0.305227	2.78755e-18	9.22656e-17		ZNRF3	22q12.1	-0.303528	4.36674e-18	1.37707e-16
	STX19	3q11.2	0.305194	2.81211e-18	9.26191e-17		CELSR1	22q13.31	-0.303476	4.42689e-18	1.39186e-16
	CD72	9p13.3	0.305123	2.86544e-18	9.40662e-17		ZSCAN30	18q12.2	-0.303428	4.48267e-18	1.40698e-16
	DNMT3B	20q11.21	0.305019	2.94541e-18	9.65334e-17		NEDD4L	18q21.31	-0.303377	4.54324e-18	1.42359e-16
	ZFP36L2	2p21	0.30498	2.97556e-18	9.72031e-17		NBEA	13q13.3	-0.303372	4.5498e-18	1.42359e-16
	RNF222	17p13.1	0.304941	3.00715e-18	9.80752e-17		THAP10	15q23	-0.303304	4.63189e-18	1.44701e-16
	ZNF503	10q22.2	0.304506	3.3737e-18	1.09495e-16		TXNDC16	14q22.1	-0.30292	5.12354e-18	1.58822e-16
	GARS1	7p14.3	0.304439	3.43347e-18	1.11255e-16		TTC8	14q31.3	-0.302898	5.15368e-18	1.59509e-16
	MED8	1p34.2	0.304428	3.44375e-18	1.11407e-16		HTT	4p16.3	-0.302784	5.3105e-18	1.64109e-16
	WNT6	2q35	0.304415	3.45586e-18	1.11619e-16		HOGA1	10q24.2	-0.302614	5.55256e-18	1.71325e-16
	SLC13A3	20q13.12	0.304079	3.77602e-18	1.21372e-16		RAD50	5q31.1	-0.302494	5.72952e-18	1.76242e-16
	RNF130	5q35.3	0.304009	3.84668e-18	1.23445e-16		GIPR	19q13.32	-0.302221	6.15542e-18	1.88475e-16
	ACTR3	2q14.1	0.303974	3.88262e-18	1.242e-16		CCDC74B	2q21.1	-0.30217	6.23788e-18	1.90564e-16
	LIMD2	17q23.3	0.303916	3.94209e-18	1.25902e-16		ABLIM3	5q32	-0.302167	6.2427e-18	1.90564e-16
	CENPW	6q22.32	0.303734	4.13601e-18	1.31675e-16		EEF1A2	20q13.33	-0.301863	6.75979e-18	2.04788e-16
	DDOST	1p36.12	0.303705	4.16802e-18	1.32483e-16		RIMS4	20q13.12	-0.301715	7.02661e-18	2.12229e-16
	DECR1	8q21.3	0.303615	4.26768e-18	1.35222e-16		SLC46A1	17q11.2	-0.301688	7.07584e-18	2.13073e-16
	B3GNT5	3q27.1	0.303564	4.32583e-18	1.36848e-16		POLR2A	17p13.1	-0.301667	7.11543e-18	2.13944e-16
	PPP1R1B	17q12	0.303475	4.42754e-18	1.39186e-16		SUGT1P3	13q14.11	-0.30121	8.01696e-18	2.39611e-16
	CBX2	17q25.3	0.303217	4.73895e-18	1.47816e-16		LETM2	8p11.23	-0.301051	8.35727e-18	2.48669e-16
	TMPRSS13	11q23.3	0.303111	4.87329e-18	1.51769e-16		LINC00957	7p13	-0.300111	1.06746e-17	3.15279e-16
	PDE6A	5q32	0.303013	4.99956e-18	1.5546e-16		HHAT	1q32.2	-0.299889	1.13081e-17	3.33498e-16
	RRAGD	6q15	0.30296	5.07e-18	1.57406e-16		CYP2B7P	19q13.2	-0.299881	1.13298e-17	3.33646e-16
	NAGK	2p13.3	0.302569	5.61756e-18	1.73064e-16		ZNF814	19q13.43	-0.299863	1.13843e-17	3.34757e-16
	KRT81	12q13.13	0.302314	6.00594e-18	1.84462e-16		CA12	15q22.2	-0.299805	1.15549e-17	3.39277e-16
	MTFR1	8q13.1	0.302241	6.12288e-18	1.87765e-16		HPN	19q13.11	-0.299735	1.17667e-17	3.4499e-16
	TXNDC5	6p24.3	0.302138	6.29047e-18	1.91617e-16		KDM3B	5q31.2	-0.299642	1.20565e-17	3.5297e-16
	SOX11	2p25.2	0.302134	6.29633e-18	1.91617e-16		TRAF3IP1	2q37.3	-0.299547	1.23573e-17	3.61247e-16
	ADGRG3	16q21	0.302108	6.33923e-18	1.9263e-16		MDM2	12q15	-0.299277	1.325e-17	3.86218e-16
	SLC2A5	1p36.23	0.301863	6.75954e-18	2.04788e-16		NDFIP1	5q31.3	-0.299098	1.38794e-17	4.03975e-16
	BCL2L12	19q13.33	0.301838	6.80461e-18	2.05834e-16		SLC24A1	15q22.31	-0.299003	1.42246e-17	4.12823e-16
	ARHGAP27	17q21.31	0.301694	7.0653e-18	2.13073e-16		BMPR1B	4q22.3	-0.298955	1.44051e-17	4.17457e-16
	WT1-AS	11p13	0.301639	7.16825e-18	2.15209e-16		CC2D2A	4p15.32	-0.298774	1.5095e-17	4.34306e-16
	RSU1	10p13	0.301361	7.70711e-18	2.3104e-16		FAM120A	9q22.31	-0.298671	1.55022e-17	4.44745e-16
	RAB3IL1	11q12.2-q12.3	0.301351	7.72785e-18	2.31316e-16		SYTL2	11q14.1	-0.298622	1.56967e-17	4.49679e-16
	KRT83	12q13.13	0.301117	8.2149e-18	2.45162e-16		PTPN9	15q24.2	-0.298547	1.60052e-17	4.57863e-16
	ESYT3	3q22.3	0.301084	8.28542e-18	2.46898e-16		CELSR2	1p13.3	-0.298101	1.79588e-17	5.09384e-16
	RBMS1	2q24.2	0.300914	8.65996e-18	2.57293e-16		PLA2G12A	4q25	-0.298073	1.80853e-17	5.12246e-16
	SEM1	7q21.3	0.30087	8.76068e-18	2.599e-16		ELAPOR2	7q21.12	-0.298046	1.82148e-17	5.14668e-16
	ADAM15	1q21.3	0.300681	9.20192e-18	2.72586e-16		LCMT2	15q15.3	-0.298044	1.82222e-17	5.14668e-16
	NECTIN1	11q23.3	0.300369	9.98234e-18	2.95268e-16		INSYN2A	10q26.2	-0.297516	2.08779e-17	5.84728e-16
	GALNT12	9q22.33	0.299488	1.25461e-17	3.66234e-16		AMFR	16q13	-0.297504	2.094e-17	5.85646e-16
	FUT6	19p13.3	0.299026	1.41409e-17	4.10989e-16		CCDC191	3q13.31	-0.297311	2.20045e-17	6.1456e-16
	MUCL1	12q13.2	0.298939	1.44648e-17	4.18582e-16		TBX3	12q24.21	-0.297255	2.23284e-17	6.22739e-16
	PEDS1	20q13.13	0.29885	1.48e-17	4.27663e-16		TMEM144	4q32.1	-0.297215	2.25565e-17	6.27354e-16
	VAMP5	2p11.2	0.298818	1.49246e-17	4.30641e-16		ZNF407	18q23	-0.297091	2.32859e-17	6.45845e-16
	COLCA1	11q23.1	0.298801	1.49902e-17	4.31913e-16		MYO5C	15q21.2	-0.297077	2.33688e-17	6.47248e-16
	SLC43A2	17p13.3	0.298739	1.52306e-17	4.37578e-16		ZSWIM6	5q12.1	-0.297059	2.34803e-17	6.49437e-16
	JRKL	11q21	0.298533	1.60652e-17	4.58923e-16		HAUS3	4p16.3	-0.297039	2.35993e-17	6.51828e-16
	GABRE	Xq28	0.29839	1.66654e-17	4.7539e-16		MOSMO	16p12.2	-0.296608	2.63602e-17	7.22109e-16
	SOCS1	16p13.13	0.29838	1.6711e-17	4.76014e-16		EML2	19q13.32	-0.296187	2.93562e-17	7.94402e-16
	RASSF4	10q11.21	0.298273	1.71797e-17	4.88669e-16		TOM1L1	17q22	-0.296056	3.03557e-17	8.20342e-16
	LY6D	8q24.3	0.29823	1.73718e-17	4.93434e-16		EFHC1	6p12.2	-0.296043	3.04603e-17	8.22059e-16
	HENMT1	1p13.3	0.298009	1.83898e-17	5.18671e-16		KCNC1	11p15.1	-0.295828	3.21799e-17	8.66133e-16
	LONRF3	Xq24	0.297955	1.86471e-17	5.25186e-16		KANSL1	17q21.31	-0.295732	3.29776e-17	8.84039e-16
	PI3	20q13.12	0.297804	1.93854e-17	5.45214e-16		HSD17B4	5q23.1	-0.295707	3.31927e-17	8.87428e-16
	TEAD3	6p21.31	0.297754	1.96365e-17	5.51501e-16		DCDC1	11p14.1	-0.29557	3.43736e-17	9.15334e-16
	DUSP9	Xq28	0.297726	1.97769e-17	5.54667e-16		STK36	2q35	-0.295187	3.79032e-17	1.00665e-15
	SLC6A16	19q13.33	0.297217	2.25442e-17	6.27354e-16		APBB2	4p14-p13	-0.29504	3.93447e-17	1.04355e-15
	PSMC2	7q22.1	0.297173	2.28026e-17	6.33317e-16		SVIP	11p14.3	-0.295007	3.96766e-17	1.05096e-15
	RFLNA	12q24.31	0.296946	2.41706e-17	6.66689e-16		SPG11	15q21.1	-0.295002	3.97322e-17	1.05104e-15
	LBR	1q42.12	0.296936	2.42347e-17	6.67538e-16		NECAP1	12p13.31	-0.294464	4.55585e-17	1.19569e-15
	MEMO1	2p22.3	0.296884	2.45553e-17	6.7544e-16		AKAP10	17p11.2	-0.294453	4.56838e-17	1.19741e-15
	CCDC82	11q21	0.296778	2.52372e-17	6.93244e-16		SYT9	11p15.4	-0.294214	4.85503e-17	1.26591e-15
	CD58	1p13.1	0.296691	2.58065e-17	7.0791e-16		DNAH7	2q32.3	-0.294108	4.98746e-17	1.29875e-15
	TNIP3	4q27	0.29658	2.65449e-17	7.26171e-16		C12ORF76	12q24.11	-0.293839	5.3395e-17	1.385e-15
	DDN	12q13.12	0.296575	2.65809e-17	7.26171e-16		ZSCAN26	6p22.1	-0.293834	5.34633e-17	1.385e-15
	LYN	8q12.1	0.296507	2.70466e-17	7.37887e-16		EAF1	3p25.1	-0.293501	5.81627e-17	1.50091e-15
	PRR18	6q27	0.296429	2.7593e-17	7.51768e-16		NCR3LG1	11p15.1	-0.293314	6.09792e-17	1.57157e-15
	PCBP3	21q22.3	0.296357	2.81113e-17	7.6485e-16		XPC	3p25.1	-0.29325	6.19749e-17	1.59109e-15
	TTYH1	19q13.42	0.296336	2.82606e-17	7.67867e-16		RNF41	12q13.3	-0.29324	6.21403e-17	1.59329e-15
	ALDH1A3	15q26.3	0.296315	2.84156e-17	7.70596e-16		BCAT2	19q13.33	-0.293216	6.25062e-17	1.60062e-15
	RBM38	20q13.31	0.296312	2.8438e-17	7.70596e-16		TESMIN	11q13.3	-0.293092	6.45049e-17	1.64969e-15
	RIN3	14q32.12	0.295982	3.09426e-17	8.33951e-16		CT62	15q23	-0.293004	6.5949e-17	1.68447e-15
	CARD9	9q34.3	0.295762	3.27272e-17	8.79682e-16		VEZF1	17q22	-0.292983	6.63088e-17	1.68935e-15
	INSL3	19p13.11	0.295735	3.29548e-17	8.84039e-16		RPGR	Xp11.4	-0.292884	6.79833e-17	1.72982e-15
	PDIA5	3q21.1	0.295718	3.3102e-17	8.86188e-16		THAP6	4q21.1	-0.292836	6.88122e-17	1.74869e-15
	BARX1	9q22.32	0.295665	3.35521e-17	8.95841e-16		SMAD4	18q21.2	-0.292789	6.9642e-17	1.76753e-15
	GSTP1	11q13.2	0.29558	3.42839e-17	9.14162e-16		KCNIP4	4p15.31-p15.2	-0.292736	7.05757e-17	1.78896e-15
	TIMM8B	11q23.1	0.295204	3.77378e-17	1.00358e-15		R3HDM2	12q13.3	-0.292434	7.61524e-17	1.91097e-15
	CCDC107	9p13.3	0.294932	4.04394e-17	1.06834e-15		AFTPH	2p14	-0.291889	8.7367e-17	2.17874e-15
	MAL	2q11.1	0.294782	4.20133e-17	1.10845e-15		SLC1A2	11p13	-0.291821	8.88742e-17	2.21082e-15
	DEPP1	10q11.21	0.294667	4.32683e-17	1.14006e-15		FSCN2	17q25.3	-0.291627	9.33151e-17	2.3184e-15
	PKP1	1q32.1	0.294608	4.39199e-17	1.15571e-15		DLG5	10q22.3	-0.29144	9.78123e-17	2.42256e-15
	NFIB	9p23-p22.3	0.29449	4.52552e-17	1.18928e-15		TLCD5	11q23.3	-0.291426	9.81525e-17	2.42655e-15
	MCF2L2	3q27.1	0.294417	4.61097e-17	1.20699e-15		ASB13	10p15.1	-0.291328	1.0058e-16	2.48044e-15
	STEAP3	2q14.2	0.294351	4.68884e-17	1.22577e-15		IVD	15q15.1	-0.291203	1.03793e-16	2.55653e-15
	SLC26A9	1q32.1	0.294278	4.77625e-17	1.24699e-15		IL6ST	5q11.2	-0.290919	1.11445e-16	2.73491e-15
	SLC4A11	20p13	0.293971	5.16276e-17	1.34265e-15		SPOP	17q21.33	-0.290754	1.16147e-16	2.83987e-15
	FUOM	10q26.3	0.293913	5.23949e-17	1.36084e-15		MYOG	1q32.1	-0.290639	1.19567e-16	2.91635e-15
	MFSD2B	2p23.3	0.293777	5.42348e-17	1.40317e-15		TSPYL1	6q22.1	-0.290601	1.20693e-16	2.94023e-15
	SLC35C1	11p11.2	0.293559	5.73082e-17	1.48077e-15		KCNJ11	11p15.1	-0.290543	1.22455e-16	2.97231e-15
	MRPL13	8q24.12	0.293299	6.12158e-17	1.57564e-15		IKZF5	10q26.13	-0.290394	1.2711e-16	3.07786e-15
	ART3	4q21.1	0.293273	6.16127e-17	1.58382e-15		LDLRAD4	18p11.21	-0.290367	1.27983e-16	3.09524e-15
	VAC14	16q22.1-q22.2	0.292985	6.6277e-17	1.68935e-15		ZNF112	19q13.31	-0.290304	1.30015e-16	3.1406e-15
	SNAI1	20q13.13	0.292682	7.15429e-17	1.81118e-15		ADIPOR2	12p13.33	-0.29016	1.34778e-16	3.24392e-15
	RBM28	7q32.1	0.292576	7.34812e-17	1.85679e-15		VPS37A	8p22	-0.289464	1.60316e-16	3.83095e-15
	TGFBR1	9q22.33	0.292573	7.35297e-17	1.85679e-15		WDR35	2p24.1	-0.289351	1.64892e-16	3.92624e-15
	EDN1	6p24.1	0.292567	7.36422e-17	1.85729e-15		DZIP3	3q13.13	-0.289307	1.667e-16	3.96457e-15
	SH3BGRL3	1p36.11	0.292547	7.40164e-17	1.86438e-15		GASK1B	4q32.1	-0.289086	1.76128e-16	4.17885e-15
	ZYX	7q34	0.292502	7.48711e-17	1.88354e-15		HNF1A	12q24.31	-0.288962	1.81669e-16	4.30522e-15
	SSR4P1	21q22.3	0.292449	7.58632e-17	1.9061e-15		KIAA1109	4q27	-0.288916	1.83747e-16	4.34419e-15
	FABP7	6q22.31	0.292389	7.70232e-17	1.9304e-15		SPATA20	17q21.33	-0.288905	1.84255e-16	4.34975e-15
	DAPK1	9q21.33	0.292292	7.89334e-17	1.9758e-15		G6PC3	17q21.31	-0.288848	1.86896e-16	4.40276e-15
	SSBP1	7q34	0.292211	8.05567e-17	2.01392e-15		GIGYF2	2q37.1	-0.2888	1.89129e-16	4.4452e-15
	DBF4	7q21.12	0.292198	8.08309e-17	2.01825e-15		ADGRB2	1p35.2	-0.288734	1.92278e-16	4.51391e-15
	KIF19	17q25.1	0.291833	8.85975e-17	2.20667e-15		AXIN2	17q24.1	-0.288578	1.99845e-16	4.68606e-15
	GPRIN2	10q11.22	0.291541	9.53417e-17	2.36582e-15		EWSAT1	15q23	-0.288471	2.05236e-16	4.79105e-15
	ADI1	2p25.3	0.291437	9.78701e-17	2.42256e-15		ZNF609	15q22.1	-0.28847	2.05279e-16	4.79105e-15
	CDC42EP1	22q13.1	0.291407	9.86199e-17	2.4351e-15		ZNF546	19q13.2	-0.288308	2.13717e-16	4.95334e-15
	FOLR1	11q13.4	0.291159	1.04944e-16	2.58169e-15		CREBL2	12p13.1	-0.288258	2.1639e-16	5.00949e-15
	NT5C2	10q24.32-q24.33	0.29096	1.10314e-16	2.71048e-15		DNAL1	14q24.3	-0.288097	2.25177e-16	5.18892e-15
	TAS2R40	7q34	0.290841	1.1367e-16	2.78609e-15		CYFIP2	5q33.3	-0.287728	2.46735e-16	5.65316e-15
	HRCT1	9p13.3	0.290819	1.14279e-16	2.79759e-15		FUT8	14q23.3	-0.287673	2.50119e-16	5.72415e-15
	KATNA1	6q25.1	0.290712	1.1739e-16	2.86676e-15		PGPEP1	19p13.11	-0.287665	2.50568e-16	5.72788e-15
	DDIT4	10q22.1	0.290551	1.22228e-16	2.97231e-15		ZNF141	4p16.3	-0.287356	2.70467e-16	6.16166e-15
	ANXA4	2p13.3	0.290546	1.22369e-16	2.97231e-15		BHLHE40	3p26.1	-0.287154	2.84341e-16	6.47038e-15
	EPHA2	1p36.13	0.29047	1.2473e-16	3.02388e-15		USP35	11q14.1	-0.286905	3.0236e-16	6.85702e-15
	PRKAG3	2q35	0.290286	1.30602e-16	3.15098e-15		FAM47E	4q21.1	-0.286835	3.0757e-16	6.95362e-15
	MYO10	5p15.1	0.290178	1.34169e-16	3.23314e-15		DCAF16	4p15.31	-0.28683	3.08008e-16	6.95362e-15
	TFAP2C	20q13.31	0.290145	1.35262e-16	3.25165e-15		CCDC30	1p34.2	-0.286758	3.13504e-16	7.06974e-15
	C6ORF223	6p21.1	0.290039	1.38916e-16	3.33548e-15		DYNC2LI1	2p21	-0.286483	3.35467e-16	7.52265e-15
	MUC16	19p13.2	0.289985	1.40801e-16	3.37669e-15		DPY19L2P4	7q21.13	-0.286406	3.41848e-16	7.64861e-15
	IL20RB	3q22.3	0.289754	1.49126e-16	3.57208e-15		PACRGL	4p15.31	-0.286349	3.46701e-16	7.73991e-15
	IL1R2	2q11.2	0.289671	1.52249e-16	3.64252e-15		TLCD3B	16p11.2	-0.286164	3.62844e-16	8.08177e-15
	GATA6	18q11.2	0.289436	1.61465e-16	3.85379e-15		MAPT-AS1	17q21.31	-0.286016	3.76308e-16	8.34504e-15
	KIF21B	1q32.1	0.289398	1.6297e-16	3.88508e-15		MBD6	12q13.3	-0.285808	3.96072e-16	8.76392e-15
	MRPL2	6p21.1	0.289256	1.6887e-16	4.0114e-15		ZBTB4	17p13.1	-0.285761	4.00646e-16	8.84549e-15
	MIS18A	21q22.11	0.288919	1.83606e-16	4.34419e-15		SYTL4	Xq22.1	-0.285756	4.01084e-16	8.84549e-15
	SLC2A6	9q34.2	0.288902	1.84416e-16	4.34975e-15		EVL	14q32.2	-0.285309	4.47591e-16	9.81709e-15
	ZP2	16p12.3-p12.2	0.288843	1.87104e-16	4.40276e-15		CGA	6q14.3	-0.285084	4.7296e-16	1.03395e-14
	SLC12A1	15q21.1	0.28852	2.02755e-16	4.74874e-15		BAZ2A	12q13.3	-0.285069	4.74692e-16	1.03661e-14
	NIPAL4	5q33.3	0.28851	2.03259e-16	4.75497e-15		NBPF4	1p13.3	-0.284952	4.88455e-16	1.0655e-14
	MYCL	1p34.2	0.288437	2.0697e-16	4.82488e-15		CYP2A6	19q13.2	-0.284862	4.99392e-16	1.08818e-14
	WT1	11p13	0.288403	2.08738e-16	4.86043e-15		IFT81	12q24.11	-0.284602	5.32165e-16	1.15207e-14
	AGO2	8q24.3	0.288389	2.0947e-16	4.87183e-15		GOLM2	15q15.3	-0.284419	5.56442e-16	1.20202e-14
	MYBL2	20q13.12	0.288353	2.11337e-16	4.90953e-15		ZNF182	Xp11.23	-0.284319	5.70249e-16	1.2292e-14
	DEFB1	8p23.1	0.288319	2.13133e-16	4.94553e-15		ZNF483	9q31.3	-0.284294	5.73732e-16	1.23538e-14
	MRPS5	2q11.1	0.288185	2.20325e-16	5.09469e-15		ZCCHC4	4p15.2	-0.284257	5.78934e-16	1.24524e-14
	THEMIS2	1p35.3	0.28816	2.21685e-16	5.12024e-15		KIFBP	10q22.1	-0.284216	5.8465e-16	1.25484e-14
	ANXA3	4q21.21	0.288115	2.2416e-16	5.17144e-15		KCTD3	1q41	-0.284159	5.92882e-16	1.27114e-14
	ACSL1	4q35.1	0.288081	2.26065e-16	5.20339e-15		ARID2	12q12	-0.284076	6.05039e-16	1.29582e-14
	PPARGC1B	5q32	0.288006	2.30305e-16	5.29491e-15		NAF1	4q32.2	-0.283971	6.20693e-16	1.32793e-14
	ASRGL1	11q12.3	0.287817	2.41315e-16	5.54168e-15		TMEM101	17q21.31	-0.28396	6.2236e-16	1.33007e-14
	MESP1	15q26.1	0.287764	2.44502e-16	5.60842e-15		RFC1	4p14	-0.283905	6.30731e-16	1.34652e-14
	XIRP1	3p22.2	0.28759	2.55283e-16	5.82901e-15		MTMR10	15q13.3	-0.283724	6.59235e-16	1.40289e-14
	EDN2	1p34.2	0.287477	2.62489e-16	5.98673e-15		FAM174A	5q21.1	-0.283586	6.81776e-16	1.44932e-14
	PSMB2	1p34.3	0.286968	2.97654e-16	6.76564e-15		ZSCAN29	15q15.3	-0.283389	7.15142e-16	1.51702e-14
	GLG1	16q23.1	0.286919	3.01287e-16	6.84045e-15		ATP6V1G2	6p21.33	-0.283313	7.28487e-16	1.5437e-14
	MVD	16q24.2	0.286884	3.03878e-16	6.88367e-15		CAPRIN1	11p13	-0.283231	7.43236e-16	1.56997e-14
	S100A7	1q21.3	0.286831	3.07868e-16	6.95362e-15		CCDC40	17q25.3	-0.283173	7.5383e-16	1.58899e-14
	SOD2	6q25.3	0.286749	3.14191e-16	7.07725e-15		SIK3	11q23.3	-0.283069	7.73049e-16	1.62779e-14
	LTBP1	2p22.3	0.286722	3.16325e-16	7.11731e-15		CST5	20p11.21	-0.282954	7.94915e-16	1.66857e-14
	RPS6KA4	11q13.1	0.2867	3.18006e-16	7.14711e-15		AMN1	12p11.21	-0.282797	8.2582e-16	1.72979e-14
	GRHL3	1p36.11	0.286531	3.31497e-16	7.44196e-15		HAUS1	18q21.1	-0.28279	8.27247e-16	1.72979e-14
	SNRPGP15	19p13.12	0.286463	3.37162e-16	7.5522e-15		CYP4V2	4q35.1-q35.2	-0.28247	8.9397e-16	1.86089e-14
	DPP4	2q24.2	0.286399	3.42504e-16	7.65474e-15		GSAP	7q11.23	-0.282404	9.08404e-16	1.88897e-14
	ENY2	8q23.1	0.28623	3.56988e-16	7.96068e-15		CYP2A7	19q13.2	-0.282358	9.185e-16	1.90601e-14
	EGFR	7p11.2	0.28616	3.63226e-16	8.08177e-15		AGR3	7p21.1	-0.282327	9.25347e-16	1.91823e-14
	IL34	16q22.1	0.286037	3.7441e-16	8.32013e-15		ANKS1B	12q23.1	-0.282148	9.66311e-16	2.00037e-14
	LINC01119	2p21	0.286033	3.7477e-16	8.32013e-15		DNAJC14	12q13.2	-0.282145	9.66971e-16	2.00037e-14
	LY6E-DT	8q24.3	0.285862	3.90776e-16	8.6563e-15		FAM234B	12p13.1	-0.282095	9.78874e-16	2.02082e-14
	CCM2	7p13	0.28576	4.00723e-16	8.84549e-15		DRC3	17p11.2	-0.281994	1.00313e-15	2.06451e-14
	NUP93	16q13	0.285578	4.19056e-16	9.23168e-15		LINC00472	6q13	-0.281832	1.04309e-15	2.14234e-14
	NMB	15q25.2	0.285521	4.24918e-16	9.35053e-15		C5ORF15	5q31.1	-0.281486	1.13396e-15	2.3266e-14
	AVEN	15q14	0.285496	4.27496e-16	9.39694e-15		RBBP8	18q11.2	-0.28132	1.18028e-15	2.41915e-14
	CALR	19p13.13	0.285485	4.28738e-16	9.41391e-15		PRRT3	3p25.3	-0.281169	1.22404e-15	2.50628e-14
	CCNQ	Xq28	0.285228	4.56523e-16	1.00021e-14		STK32B	4p16.2	-0.281163	1.22579e-15	2.5073e-14
	HTRA4	8p11.22	0.285127	4.67959e-16	1.02414e-14		GRIA2	4q32.1	-0.281125	1.23712e-15	2.52781e-14
	PRRX2	9q34.11	0.284844	5.01553e-16	1.0917e-14		MAGEE1	Xq13.3	-0.280923	1.29874e-15	2.64033e-14
	PLA2G15	16q22.1	0.284728	5.16002e-16	1.12193e-14		NUP62CL	Xq22.3	-0.280863	1.31774e-15	2.67404e-14
	CYB5R3	22q13.2	0.284659	5.24778e-16	1.13977e-14		SERPINA5	14q32.13	-0.280862	1.31799e-15	2.67404e-14
	RBIS	8q21.2	0.284638	5.27469e-16	1.14437e-14		FPGT	1p31.1	-0.28084	1.3249e-15	2.68533e-14
	THEM6	8q24.3	0.28461	5.31064e-16	1.15093e-14		GDAP1	8q21.11	-0.280737	1.35829e-15	2.74468e-14
	KCNS1	20q13.12	0.284565	5.36932e-16	1.16113e-14		GUSBP2	6p22.2	-0.280562	1.41647e-15	2.85648e-14
	CTSC	11q14.2	0.284355	5.65219e-16	1.21967e-14		PRR15	7p14.3	-0.280554	1.41919e-15	2.85908e-14
	TRIM29	11q23.3	0.284251	5.79717e-16	1.24558e-14		COG7	16p12.2	-0.280545	1.42229e-15	2.86246e-14
	PTCHD1	Xp22.11	0.283859	6.37931e-16	1.36044e-14		STC2	5q35.2	-0.280501	1.43754e-15	2.88734e-14
	NDRG1	8q24.22	0.283748	6.55362e-16	1.39613e-14		PRKAB1	12q24.23	-0.280492	1.44055e-15	2.89048e-14
	BRINP3	1q31.1	0.28342	7.09793e-16	1.50727e-14		SYTL5	Xp11.4	-0.280207	1.54283e-15	3.08951e-14
	EXT1	8q24.11	0.283284	7.33695e-16	1.55309e-14		VWA7	6p21.33	-0.280171	1.55605e-15	3.11287e-14
	KCNN4	19q13.31	0.283234	7.4265e-16	1.56997e-14		PLAT	8p11.21	-0.280134	1.56996e-15	3.13758e-14
	ZSWIM4	19p13.13	0.283221	7.44997e-16	1.57203e-14		KIF5C	2q23.1-q23.2	-0.280127	1.57269e-15	3.13919e-14
	MYCN	2p24.3	0.28304	7.78534e-16	1.63762e-14		RND2	17q21.31	-0.280124	1.57391e-15	3.13919e-14
	LOC644936	5q14.1	0.283014	7.83343e-16	1.64601e-14		WDR7	18q21.31	-0.280067	1.59553e-15	3.17916e-14
	OR5AU1	14q11.2	0.282918	8.01809e-16	1.68128e-14		FAN1	15q13.3	-0.280059	1.59868e-15	3.18226e-14
	JAK3	19p13.11	0.282788	8.27536e-16	1.72979e-14		ANO5	11p14.3	-0.2799	1.66048e-15	3.302e-14
	UBXN2A	2p23.3	0.28258	8.7041e-16	1.81751e-14		C18ORF25	18q21.1	-0.279633	1.7704e-15	3.50665e-14
	RAB6B	3q22.1	0.282535	8.79951e-16	1.83552e-14		PMAIP1	18q21.32	-0.279531	1.81422e-15	3.58989e-14
	PLEKHF1	19q12	0.282483	8.91062e-16	1.85676e-14		KIF3A	5q31.1	-0.279468	1.84171e-15	3.6371e-14
	BCL11B	14q32.2	0.28236	9.17988e-16	1.90601e-14		ABAT	16p13.2	-0.279415	1.86501e-15	3.67948e-14
	ZNF695	1q44	0.282113	9.74641e-16	2.01416e-14		SNX24	5q23.2	-0.279407	1.86865e-15	3.68304e-14
	HOXC11	12q13.13	0.28208	9.82334e-16	2.02588e-14		HIVEP3	1p34.2	-0.279332	1.90238e-15	3.73892e-14
	SLC6A2	16q12.2	0.282036	9.92855e-16	2.04546e-14		RPS10P7	1q32.1	-0.279332	1.9026e-15	3.73892e-14
	NOL10	2p25.1	0.281942	1.01585e-15	2.08854e-14		LEO1	15q21.2	-0.27923	1.94942e-15	3.82718e-14
	NRAD1	13q14.11	0.281121	1.23834e-15	2.52781e-14		MORN4	10q24.2	-0.279209	1.95921e-15	3.84261e-14
	SLC25A13	7q21.3	0.281074	1.25253e-15	2.55416e-14		TMED7	5q22.3	-0.279156	1.98424e-15	3.8879e-14
	CDC20	1p34.2	0.281055	1.25811e-15	2.56294e-14		NBPF6	1p13.3	-0.27914	1.99172e-15	3.89631e-14
	SPTBN2	11q13.2	0.28094	1.29359e-15	2.63253e-14		ODR4	1q31.1	-0.279117	2.003e-15	3.90914e-14
	CD6	11q12.2	0.280831	1.3278e-15	2.68848e-14		C3ORF18	3p21.31	-0.279113	2.00484e-15	3.90914e-14
	CORO1C	12q24.11	0.28075	1.35405e-15	2.73887e-14		NXPH3	17q21.33	-0.279103	2.00951e-15	3.91444e-14
	IL12RB2	1p31.3	0.280628	1.39422e-15	2.81444e-14		ATP9B	18q23	-0.278759	2.1815e-15	4.23299e-14
	RGS9BP	19q13.11	0.28053	1.42753e-15	2.87011e-14		CENPBD1P1	19q13.43	-0.278718	2.20324e-15	4.27105e-14
	SPATA3	2q37.1	0.280361	1.48662e-15	2.97993e-14		TPSG1	16p13.3	-0.278595	2.26876e-15	4.38531e-14
	FAM89A	1q42.2	0.279866	1.67438e-15	3.32633e-14		USP47	11p15.3	-0.278384	2.38596e-15	4.59855e-14
	CRYAB	11q23.1	0.279812	1.69614e-15	3.36622e-14		SPIN3	Xp11.21	-0.278372	2.39282e-15	4.60734e-14
	TRAF3IP2	6q21	0.27968	1.75061e-15	3.4709e-14		ABCA3	16p13.3	-0.278356	2.40187e-15	4.62032e-14
	SNRPG	2p13.3	0.279525	1.81684e-15	3.59153e-14		RCBTB1	13q14.2	-0.278093	2.55676e-15	4.89943e-14
	SLC9A4	2q12.1	0.279348	1.89548e-15	3.73225e-14		TSHZ1	18q22.3	-0.277972	2.63134e-15	5.03273e-14
	IVL	1q21.3	0.279139	1.99242e-15	3.89631e-14		EFL1	15q25.2	-0.277503	2.94194e-15	5.5894e-14
	UNC13D	17q25.3	0.279133	1.99513e-15	3.8978e-14		METTL14	4q26	-0.277468	2.96614e-15	5.63005e-14
	ARPC1B	7q22.1	0.279032	2.04405e-15	3.97786e-14		RASA1	5q14.3	-0.277261	3.11545e-15	5.90226e-14
	SIRPA	20p13	0.278959	2.07996e-15	4.04381e-14		ZCCHC8	12q24.31	-0.277211	3.15304e-15	5.96219e-14
	PAK1IP1	6p24.2	0.278798	2.16138e-15	4.19802e-14		SIAH2	3q25.1	-0.277174	3.18031e-15	6.00808e-14
	PNKD	2q35	0.27866	2.23403e-15	4.32653e-14		JAKMIP3	10q26.3	-0.27713	3.21417e-15	6.06062e-14
	VNN2	6q23.2	0.278627	2.25173e-15	4.3566e-14		TTC14	3q26.33	-0.276626	3.62133e-15	6.78364e-14
	SRPK3	Xq28	0.278539	2.2992e-15	4.43987e-14		FAAH	1p33	-0.276439	3.78526e-15	7.0841e-14
	PPP1R3G	6p25.1	0.278511	2.31443e-15	4.46498e-14		SPATA5	4q28.1	-0.276246	3.96206e-15	7.40806e-14
	GPR156	3q13.33	0.278303	2.43231e-15	4.67438e-14		PRTG	15q21.3	-0.276197	4.00812e-15	7.48719e-14
	GAL	11q13.2	0.278199	2.49328e-15	4.78696e-14		SUDS3	12q24.23	-0.276127	4.0744e-15	7.59683e-14
	PRADC1	2p13.2	0.278127	2.53636e-15	4.865e-14		ZNF568	19q13.12	-0.276058	4.14146e-15	7.71467e-14
	LINC02159	5q34	0.278058	2.57843e-15	4.93624e-14		RGS12	4p16.3	-0.276044	4.15572e-15	7.73404e-14
	TGM1	14q12	0.277903	2.67531e-15	5.10714e-14		CYB5D2	17p13.2	-0.275759	4.4442e-15	8.22506e-14
	CPNE2	16q13	0.277903	2.67535e-15	5.10714e-14		CNST	1q44	-0.275582	4.63364e-15	8.55196e-14
	MYO1E	15q22.2	0.27783	2.72176e-15	5.19078e-14		SERPINI1	3q26.1	-0.275538	4.68124e-15	8.62391e-14
	RPP25	15q24.2	0.277697	2.80918e-15	5.34797e-14		SORCS1	10q25.1	-0.275384	4.85456e-15	8.93497e-14
	TIMM8A	Xq22.1	0.277697	2.80952e-15	5.34797e-14		ALG13	Xq23	-0.27529	4.96267e-15	9.12557e-14
	TCHHL1	1q21.3	0.277628	2.85573e-15	5.43076e-14		ABHD2	15q26.1	-0.275257	5.00189e-15	9.18926e-14
	PLEKHS1	10q25.3	0.277434	2.99011e-15	5.67016e-14		MRFAP1L1	4p16.1	-0.275116	5.17003e-15	9.48945e-14
	TMEM159	16p12.3	0.277211	3.15303e-15	5.96219e-14		CYB5D1	17p13.1	-0.274982	5.33636e-15	9.75895e-14
	TMEM138	11q12.2	0.277151	3.19779e-15	6.03541e-14		KCND3	1p13.2	-0.27494	5.38873e-15	9.84574e-14
	BCL11A	2p16.1	0.277058	3.26903e-15	6.15826e-14		SEMA3B	3p21.31	-0.27492	5.41435e-15	9.88354e-14
	CHST11	12q23.3	0.277039	3.28413e-15	6.18089e-14		POMGNT1	1p34.1	-0.274912	5.42436e-15	9.89279e-14
	JPH2	20q13.12	0.277006	3.31016e-15	6.2208e-14		BOD1L1	4p15.33	-0.274789	5.58291e-15	1.01632e-13
	GBP1	1p22.2	0.277004	3.31155e-15	6.2208e-14		FNIP1	5q31.1	-0.274575	5.87032e-15	1.06479e-13
	ATP6V0A4	7q34	0.276866	3.42162e-15	6.4189e-14		TADA2B	4p16.1	-0.274562	5.8889e-15	1.0672e-13
	BTG3	21q21.1	0.276864	3.42341e-15	6.4189e-14		RAB17	2q37.3	-0.274552	5.90273e-15	1.06874e-13
	ACKR2	3p22.1	0.27617	4.03321e-15	7.52704e-14		MYH10	17p13.1	-0.274482	5.99997e-15	1.08536e-13
	ITPRIP	10q25.1	0.275917	4.28207e-15	7.96179e-14		BAG1	9p13.3	-0.274464	6.02515e-15	1.08893e-13
	SLC29A4	7p22.1	0.275883	4.31641e-15	8.01818e-14		RNF157	17q25.1	-0.274439	6.06074e-15	1.09438e-13
	CSTA	3q21.1	0.275836	4.36471e-15	8.10041e-14		ZFP14	19q13.12	-0.274421	6.08599e-15	1.09795e-13
	AWAT2	Xq13.1	0.275783	4.41914e-15	8.19382e-14		ABCD3	1p21.3	-0.274377	6.15036e-15	1.10856e-13
	CTSZ	20q13.32	0.275769	4.43376e-15	8.21333e-14		NBPF22P	5q14.3	-0.274369	6.16199e-15	1.10966e-13
	CNGB1	16q21	0.275724	4.48081e-15	8.28515e-14		BTG2	1q32.1	-0.27433	6.21749e-15	1.11865e-13
	ANXA2R	5p12	0.275595	4.61961e-15	8.53391e-14		SYT13	11p11.2	-0.274278	6.29485e-15	1.13053e-13
	PDCD1LG2	9p24.1	0.275565	4.65148e-15	8.57697e-14		RAB3A	19p13.11	-0.27425	6.33512e-15	1.13675e-13
	ZPR1	11q23.3	0.275084	5.20961e-15	9.55333e-14		EPG5	18q12.3-q21.1	-0.274056	6.62952e-15	1.18744e-13
	PNMA3	Xq28	0.275038	5.26609e-15	9.64807e-14		APPBP2	17q23.2	-0.274052	6.63628e-15	1.18759e-13
	MRAS	3q22.3	0.274991	5.3251e-15	9.74726e-14		ZNF397	18q12.2	-0.274045	6.64642e-15	1.18834e-13
	GPR19	12p13.1	0.274817	5.54627e-15	1.01059e-13		DISP1	1q41	-0.274038	6.65876e-15	1.18949e-13
	TUBA1C	12q13.12	0.274786	5.58783e-15	1.01632e-13		ZNF785	16p11.2	-0.274016	6.69165e-15	1.1943e-13
	CENPN	16q23.2	0.274646	5.77423e-15	1.04926e-13		KLHL11	17q21.2	-0.273947	6.80084e-15	1.21271e-13
	SRM	1p36.22	0.274602	5.83437e-15	1.05923e-13		SLC22A4	5q31.1	-0.273852	6.95467e-15	1.23793e-13
	RUNX3	1p36.11	0.274325	6.22478e-15	1.11895e-13		NPY1R	4q32.2	-0.273684	7.23295e-15	1.28177e-13
	KLK1	19q13.33	0.274063	6.61888e-15	1.1866e-13		PGGT1B	5q22.3	-0.27356	7.4452e-15	1.31473e-13
	CALU	7q32.1	0.273887	6.89733e-15	1.22882e-13		ANKRD40	17q21.33	-0.273377	7.77094e-15	1.37104e-13
	RAET1L	6q25.1	0.273831	6.98844e-15	1.24213e-13		FUT8-AS1	14q23.3	-0.273227	8.04766e-15	1.41861e-13
	GPC2	7q22.1	0.27383	6.99065e-15	1.24213e-13		ZNF280D	15q21.3	-0.273023	8.43888e-15	1.47976e-13
	FBLN2	3p25.1	0.273769	7.09095e-15	1.25883e-13		TAF9B	Xq21.1	-0.273012	8.46004e-15	1.48217e-13
	CLDN4	7q11.23	0.273763	7.1011e-15	1.25952e-13		CCDC74A	2q21.1	-0.272998	8.48907e-15	1.48596e-13
	TNFSF12-TNFSF13	17p13.1	0.273677	7.24384e-15	1.28256e-13		MAP2K4	17p12	-0.272976	8.5325e-15	1.49226e-13
	LY96	8q21.11	0.273658	7.27715e-15	1.28732e-13		C12ORF43	12q24.31	-0.272903	8.67858e-15	1.51648e-13
	EML4	2p21	0.273605	7.36752e-15	1.30216e-13		ZNF621	3p22.1	-0.272632	9.24353e-15	1.61098e-13
	MLIP	6p12.1	0.273107	8.27524e-15	1.45745e-13		TMEM232	5q22.1	-0.272565	9.38839e-15	1.63338e-13
	CYRIB	8q24.21	0.273102	8.28567e-15	1.458e-13		ZNF552	19q13.43	-0.272442	9.66144e-15	1.67797e-13
	ULBP3	6q25.1	0.273065	8.35671e-15	1.46921e-13		PCDH19	Xq22.1	-0.272376	9.81125e-15	1.70202e-13
	CSRP2	12q21.2	0.273057	8.37157e-15	1.47053e-13		HEXIM1	17q21.31	-0.272372	9.82071e-15	1.70202e-13
	RNF114	20q13.13	0.273041	8.40302e-15	1.47476e-13		PREPL	2p21	-0.272262	1.00732e-14	1.74043e-13
	FMNL2	2q23.3	0.272795	8.8993e-15	1.55369e-13		BSN	3p21.31	-0.272247	1.01088e-14	1.74507e-13
	FGFBP3	10q23.32	0.27274	9.01397e-15	1.57234e-13		USP33	1p31.1	-0.272108	1.04398e-14	1.79756e-13
	RGS6	14q24.2	0.272608	9.29628e-15	1.61877e-13		ZNF740	12q13.13	-0.272078	1.05139e-14	1.80722e-13
	PLAGL1	6q24.2	0.272467	9.60474e-15	1.66957e-13		EIF4A2	3q27.3	-0.272045	1.05948e-14	1.81957e-13
	IDO1	8p11.21	0.27237	9.82539e-15	1.70202e-13		RCOR3	1q32.2-q32.3	-0.271809	1.11917e-14	1.91879e-13
	IL12A	3q25.33	0.272343	9.88506e-15	1.71088e-13		PHF12	17q11.2	-0.271657	1.15916e-14	1.98564e-13
	CFLAR	2q33.1	0.272281	1.00308e-14	1.7346e-13		SEMA3F	3p21.31	-0.271613	1.17115e-14	2.0029e-13
	C10ORF55	10q22.2	0.27219	1.02437e-14	1.76684e-13		USP27X-DT	Xp11.23	-0.271613	1.17123e-14	2.0029e-13
	RAB5IF	20q11.23	0.272131	1.03848e-14	1.78964e-13		DHX40	17q23.1	-0.271349	1.24494e-14	2.12712e-13
	LINC01588	14q21.3	0.272079	1.05103e-14	1.80722e-13		TRAPPC8	18q12.1	-0.27128	1.26508e-14	2.15969e-13
	SERPING1	11q12.1	0.27189	1.09821e-14	1.88445e-13		ZNF44	19p13.2	-0.271177	1.29536e-14	2.2095e-13
	SERPINH1	11q13.5	0.271073	1.32718e-14	2.26185e-13		PIK3C2A	11p15.1	-0.271013	1.34563e-14	2.29134e-13
	SURF4	9q34.2	0.270935	1.37013e-14	2.33109e-13		RGS11	16p13.3	-0.27084	1.40045e-14	2.37862e-13
	LINC01559	12p13.1	0.270879	1.38802e-14	2.35952e-13		PREX1	20q13.13	-0.270544	1.49958e-14	2.54053e-13
	IMPDH1	7q32.1	0.27064	1.46664e-14	2.48894e-13		INPP5J	22q12.2	-0.269942	1.7225e-14	2.90101e-13
	KHDRBS3	8q24.23	0.27055	1.4974e-14	2.53899e-13		EID1	15q21.1	-0.269687	1.82654e-14	3.07366e-13
	IL2RA	10p15.1	0.270445	1.53407e-14	2.59677e-13		PEX12	17q12	-0.269263	2.0136e-14	3.37708e-13
	CD99	Xp22.32 and Yp11.3	0.270389	1.5541e-14	2.62846e-13		MDH1B	2q33.3	-0.269126	2.07759e-14	3.47567e-13
	KLF5	13q22.1	0.270287	1.59089e-14	2.68841e-13		LRRC56	11p15.5	-0.269112	2.08447e-14	3.48426e-13
	TMEM132A	11q12.2	0.270268	1.59812e-14	2.69835e-13		ZDHHC17	12q21.2	-0.269073	2.10292e-14	3.50925e-13
	TRAF3IP3	1q32.2	0.270085	1.66688e-14	2.81207e-13		COMMD10	5q23.1	-0.26894	2.16829e-14	3.61444e-13
	GLMP	1q22	0.269971	1.71102e-14	2.88411e-13		EFCAB6	22q13.2-q13.31	-0.268937	2.16957e-14	3.61444e-13
	FOXRED1	11q24.2	0.269466	1.92164e-14	3.23098e-13		TBCK	4q24	-0.268868	2.20441e-14	3.66943e-13
	S100A7A	1q21.3	0.269317	1.98844e-14	3.34048e-13		ELOVL6	4q25	-0.268571	2.3595e-14	3.90811e-13
	RNF217	6q22.31	0.269291	2.00062e-14	3.35812e-13		STXBP3	1p13.3	-0.268515	2.38959e-14	3.95468e-13
	HHIPL1	14q32.2	0.269195	2.04515e-14	3.42712e-13		ETNK1	12p12.1	-0.268485	2.40618e-14	3.97803e-13
	RGMA	15q26.1	0.26916	2.06175e-14	3.45206e-13		EMB	5q11.1	-0.268175	2.58295e-14	4.2503e-13
	DNAJC2	7q22.1	0.269076	2.10169e-14	3.50925e-13		CFAP36	2p16.1	-0.268175	2.58308e-14	4.2503e-13
	FOSL1	11q13.1	0.268841	2.21804e-14	3.68906e-13		CXXC5	5q31.2	-0.268118	2.61683e-14	4.30231e-13
	PLAAT1	3q29	0.268794	2.24215e-14	3.72606e-13		NMNAT3	3q23	-0.268051	2.65697e-14	4.36472e-13
	DCPS	11q24.2	0.26866	2.31156e-14	3.83823e-13		RPS6KA6	Xq21.1	-0.268031	2.66899e-14	4.38086e-13
	RGS20	8q11.23	0.268655	2.31465e-14	3.84017e-13		HEBP1	12p13.1	-0.267943	2.72305e-14	4.46229e-13
	MTHFD1L	6q25.1	0.268619	2.33347e-14	3.86819e-13		ZC3H6	2q14.1	-0.26771	2.87205e-14	4.69109e-13
	CHP1P2	6q25.3	0.268482	2.40768e-14	3.97803e-13		ACMSD	2q21.3	-0.267669	2.89925e-14	4.73167e-13
	MNX1	7q36.3	0.268466	2.41642e-14	3.98918e-13		C18ORF32	18q21.1	-0.267527	2.99422e-14	4.88268e-13
	ORM2	9q32	0.268397	2.455e-14	4.04954e-13		PCMTD2	20q13.33	-0.267177	3.24258e-14	5.26623e-13
	ARFGAP3	22q13.2	0.268311	2.50397e-14	4.12692e-13		DOCK1	10q26.2	-0.267099	3.30065e-14	5.3562e-13
	SLC35A2	Xp11.23	0.268007	2.68409e-14	4.40204e-13		ZNF844	19p13.2	-0.267042	3.34373e-14	5.41733e-13
	RARRES2	7q36.1	0.267939	2.72586e-14	4.46324e-13		ZNF792	19q13.11	-0.267035	3.34931e-14	5.41805e-13
	GPT2	16q11.2	0.267882	2.76182e-14	4.51842e-13		TUBGCP4	15q15.3	-0.267034	3.34959e-14	5.41805e-13
	SAT1	Xp22.11	0.267755	2.84276e-14	4.64704e-13		IRX5	16q12.2	-0.267017	3.3629e-14	5.43184e-13
	ANXA1	9q21.13	0.267482	3.02517e-14	4.92913e-13		GREB1	2p25.1	-0.266923	3.435e-14	5.53832e-13
	KLK10	19q13.41	0.267413	3.07315e-14	5.00324e-13		GRIK3	1p34.3	-0.266813	3.52248e-14	5.67479e-13
	SP6	17q21.32	0.267391	3.08846e-14	5.02408e-13		DENND4C	9p22.1	-0.266715	3.60147e-14	5.78343e-13
	NDUFB9	8q24.13	0.267187	3.23523e-14	5.25856e-13		SNX1	15q22.31	-0.266589	3.7059e-14	5.9321e-13
	MDH2	7q11.23	0.267056	3.33295e-14	5.40424e-13		UBTF	17q21.31	-0.266556	3.73361e-14	5.96692e-13
	ANGPTL4	19p13.2	0.267016	3.36354e-14	5.43184e-13		CGGBP1	3p11.1	-0.266521	3.76383e-14	6.01043e-13
	P2RY6	11q13.4	0.26698	3.39094e-14	5.47168e-13		FAM13B	5q31.2	-0.266479	3.7996e-14	6.05788e-13
	PIWIL4	11q21	0.266809	3.52535e-14	5.67485e-13		EPB41	1p35.3	-0.266378	3.88805e-14	6.18414e-13
	MMP1	11q22.2	0.266756	3.56798e-14	5.73885e-13		CST3	20p11.21	-0.266345	3.91711e-14	6.22541e-13
	PABPC1	8q22.3	0.266722	3.59587e-14	5.77908e-13		ZNF629	16p11.2	-0.266201	4.04648e-14	6.41574e-13
	BATF3	1q32.3	0.26668	3.6303e-14	5.82506e-13		ZNF625	19p13.2	-0.266173	4.07246e-14	6.45182e-13
	SLC39A7	6p21.32	0.266647	3.65774e-14	5.86439e-13		TNKS	8p23.1	-0.265958	4.27544e-14	6.76804e-13
	TTC39B	9p22.3	0.266628	3.67307e-14	5.88426e-13		TCEAL3	Xq22.2	-0.265864	4.36777e-14	6.90874e-13
	SMIM5	17q25.1	0.266559	3.73126e-14	5.96692e-13		TOGARAM1	14q21.2	-0.265787	4.4445e-14	7.02456e-13
	CHAC1	15q15.1	0.266489	3.79123e-14	6.04936e-13		CARF	2q33.2	-0.265765	4.4668e-14	7.05423e-13
	SLC7A5	16q24.2	0.266445	3.82871e-14	6.09944e-13		BUB3	10q26.13	-0.26576	4.47168e-14	7.05637e-13
	WNT10A	2q35	0.266421	3.85012e-14	6.12866e-13		KCNC2	12q21.1	-0.265743	4.48926e-14	7.07854e-13
	RNF122	8p12	0.266258	3.99483e-14	6.34389e-13		FRS2	12q15	-0.265733	4.49867e-14	7.08779e-13
	MYPN	10q21.3	0.266236	4.01505e-14	6.37095e-13		C10ORF82	10q25.3	-0.265621	4.61435e-14	7.25864e-13
	VTCN1	1p13.1-p12	0.265716	4.51595e-14	7.10942e-13		AAGAB	15q23	-0.265535	4.70437e-14	7.39443e-13
	S100A4	1q21.3	0.26553	4.70994e-14	7.39738e-13		AMBRA1	11p11.2	-0.265497	4.74581e-14	7.44787e-13
	ADGRG1	16q21	0.265485	4.75837e-14	7.46173e-13		IGBP1	Xq13.1	-0.265423	4.82526e-14	7.5607e-13
	MACC1	7p21.1	0.265398	4.85259e-14	7.59759e-13		MYCBPAP	17q21.33	-0.265254	5.01258e-14	7.82362e-13
	RAD51AP2	2p24.2	0.265379	4.87306e-14	7.62368e-13		ACBD4	17q21.31	-0.265241	5.02791e-14	7.84143e-13
	GUCA1A	6p21.1	0.265306	4.95432e-14	7.74475e-13		RAB39B	Xq28	-0.265226	5.04512e-14	7.86215e-13
	TTLL4	2q35	0.265297	4.9648e-14	7.75508e-13		SPIRE1	18p11.21	-0.265188	5.08823e-14	7.92316e-13
	GPI	19q13.11	0.265148	5.13374e-14	7.9844e-13		BDP1	5q13.2	-0.265147	5.13554e-14	7.9844e-13
	SLC25A5	Xq24	0.264914	5.41242e-14	8.39533e-13		CCDC106	19q13.42	-0.265032	5.27058e-14	8.18801e-13
	STK17A	7p13	0.264838	5.50587e-14	8.53367e-13		CRIPAK	4p16.3	-0.264936	5.38592e-14	8.3607e-13
	CASP4	11q22.3	0.264752	5.61314e-14	8.68648e-13		GPATCH8	17q21.31	-0.26478	5.57834e-14	8.63931e-13
	ULBP1	6q25.1	0.264742	5.62595e-14	8.69958e-13		ZNF287	17p11.2	-0.264732	5.6382e-14	8.7118e-13
	TMEM109	11q12.2	0.264692	5.68948e-14	8.78426e-13		EPB41L5	2q14.2	-0.264554	5.86912e-14	9.03376e-13
	SEC13	3p25.3	0.264688	5.69436e-14	8.78502e-13		SLU7	5q33.3	-0.264507	5.93133e-14	9.12249e-13
	RIPK2	8q21.3	0.264651	5.74233e-14	8.85221e-13		DLGAP1	18p11.31	-0.264493	5.95032e-14	9.14468e-13
	CLCA2	1p22.3	0.264563	5.85679e-14	9.02171e-13		PIGB	15q21.3	-0.264451	6.00638e-14	9.20963e-13
	IMPA2	18p11.21	0.264483	5.96418e-14	9.15895e-13		SERPINB6	6p25.2	-0.264379	6.10451e-14	9.34502e-13
	KREMEN2	16p13.3	0.264474	5.97599e-14	9.17005e-13		RLN2	9p24.1	-0.264353	6.14081e-14	9.387e-13
	TRABD2A	2p11.2	0.264422	6.04651e-14	9.26407e-13		C8ORF86	8p11.22	-0.264279	6.24349e-14	9.52941e-13
	HOMER3	19p13.11	0.264376	6.10868e-14	9.34502e-13		RBM22	5q33.1	-0.264261	6.26873e-14	9.56065e-13
	PCSK7	11q23.3	0.264309	6.20203e-14	9.47336e-13		MIDEAS	14q24.3	-0.264113	6.48117e-14	9.86961e-13
	CA9	9p13.3	0.264204	6.34925e-14	9.67609e-13		C17ORF75	17q11.2	-0.264073	6.53985e-14	9.9514e-13
	SRPRA	11q24.2	0.264024	6.6117e-14	1.00531e-12		PJA2	5q21.3	-0.263723	7.07403e-14	1.06992e-12
	LAMP3	3q27.1	0.263957	6.71164e-14	1.01973e-12		MAPK8IP1	11p11.2	-0.263551	7.35065e-14	1.11092e-12
	BEND3	6q21	0.263881	6.82705e-14	1.03648e-12		KCNK15	20q13.12	-0.263543	7.36425e-14	1.11214e-12
	TCAM1P	17q23.3	0.26387	6.84346e-14	1.03818e-12		CNOT8	5q33.2	-0.263419	7.57195e-14	1.14264e-12
	C1QL4	12q13.12	0.263867	6.84948e-14	1.03831e-12		PIK3C3	18q12.3	-0.263409	7.58832e-14	1.14425e-12
	TIGD2	4q22.1	0.263855	6.86794e-14	1.04032e-12		GRM3	7q21.11-q21.12	-0.263378	7.64241e-14	1.15154e-12
	AADAC	3q25.1	0.263847	6.87984e-14	1.04134e-12		KLHDC1	14q21.3	-0.263346	7.697e-14	1.15889e-12
	EPHB4	7q22.1	0.26313	8.07706e-14	1.21338e-12		ZKSCAN8	6p21	-0.263248	7.8676e-14	1.18318e-12
	LAGE3	Xq28	0.263058	8.20805e-14	1.23121e-12		DYNLRB2	16q23.2	-0.263246	7.87013e-14	1.18318e-12
	CKAP4	12q23.3	0.262882	8.53817e-14	1.27785e-12		ZNF45	19q13.31	-0.263066	8.19456e-14	1.23011e-12
	UPP1	7p12.3	0.262678	8.936e-14	1.33242e-12		MIER3	5q11.2	-0.262947	8.4147e-14	1.26126e-12
	KCNQ4	1p34.2	0.262661	8.96985e-14	1.33647e-12		PCP2	19p13.2	-0.262935	8.43691e-14	1.26364e-12
	SLC6A9	1p34.1	0.262555	9.18557e-14	1.36658e-12		NPHP1	2q13	-0.262868	8.5644e-14	1.28082e-12
	COL4A4	2q36.3	0.262423	9.46001e-14	1.40532e-12		LETM1	4p16.3	-0.262794	8.70685e-14	1.30115e-12
	HOTAIR	12q13.13	0.262092	1.01819e-13	1.50364e-12		N6AMT1	21q21.3	-0.262748	8.79673e-14	1.31361e-12
	BIN1	2q14.3	0.261986	1.04254e-13	1.53733e-12		NNT	5p12	-0.262683	8.92641e-14	1.33198e-12
	PATL2	15q21.1	0.261901	1.06257e-13	1.5634e-12		ZNF490	19p13.2-p13.13	-0.262576	9.14142e-14	1.36102e-12
	LILRA5	19q13.42	0.261893	1.06443e-13	1.56472e-12		ATE1	10q26.13	-0.262468	9.36502e-14	1.39224e-12
	MALSU1	7p15.3	0.26177	1.09391e-13	1.60362e-12		AP1AR	4q25	-0.262398	9.51269e-14	1.41209e-12
	CXORF49B	Xq13.1	0.261733	1.10293e-13	1.61331e-12		RALGPS1	9q33.3	-0.262381	9.54884e-14	1.41641e-12
	LBP	20q11.23	0.261721	1.10589e-13	1.61645e-12		HACD3	15q22.31	-0.26235	9.61484e-14	1.42515e-12
	CCL7	17q12	0.261426	1.18078e-13	1.71839e-12		WDR6	3p21.31	-0.262333	9.64993e-14	1.42929e-12
	VPREB3	22q11.23	0.261364	1.19725e-13	1.73857e-12		RGL3	19p13.2	-0.262294	9.73598e-14	1.44061e-12
	SLC30A2	1p36.11	0.261208	1.2392e-13	1.79689e-12		TSPY26P	20q11.21	-0.262291	9.74076e-14	1.44061e-12
	CTSA	20q13.12	0.261164	1.25145e-13	1.81333e-12		CNNM4	2q11.2	-0.262245	9.84264e-14	1.4546e-12
	SLC6A17	1p13.3	0.261137	1.25907e-13	1.82174e-12		RETREG3	17q21.2	-0.262029	1.0327e-13	1.52394e-12
	HK3	5q35.2	0.2611	1.26928e-13	1.83387e-12		MSI2	17q22	-0.261945	1.05206e-13	1.55022e-12
	MGAT1	5q35.3	0.261029	1.28964e-13	1.86059e-12		AHCYL1	1p13.3	-0.261904	1.06182e-13	1.5634e-12
	CD24	6q21	0.260962	1.30885e-13	1.88695e-12		UBE2K	4p14	-0.26189	1.06503e-13	1.56472e-12
	COLGALT1	19p13.11	0.260896	1.3282e-13	1.91347e-12		CAMK2B	7p13	-0.261826	1.08041e-13	1.58616e-12
	SPDYC	11q13.1	0.260884	1.33154e-13	1.9169e-12		DLG4	17p13.1	-0.261772	1.09341e-13	1.60362e-12
	BOC	3q13.2	0.260797	1.35746e-13	1.95281e-12		YEATS4	12q15	-0.26176	1.09644e-13	1.60617e-12
	FANCE	6p21.31	0.260773	1.36461e-13	1.96168e-12		CERS2	1q21.3	-0.261738	1.10162e-13	1.61257e-12
	GSTA5	6p12.2	0.260648	1.40293e-13	2.01388e-12		KIAA0040	1q25.1	-0.261713	1.10782e-13	1.6181e-12
	MT1X	16q13	0.260625	1.41015e-13	2.0228e-12		PHC1	12p13.31	-0.261624	1.13011e-13	1.64945e-12
	C11ORF80	11q13.2	0.260563	1.42964e-13	2.04929e-12		KDSR	18q21.33	-0.261568	1.14426e-13	1.66889e-12
	DENND3	8q24.3	0.260549	1.43411e-13	2.05276e-12		MCCC2	5q13.2	-0.261542	1.15075e-13	1.67713e-12
	KLK8	19q13.41	0.260506	1.44774e-13	2.07078e-12		CERS6	2q24.3	-0.261464	1.17101e-13	1.70541e-12
	CSMD2	1p35.1	0.260494	1.45149e-13	2.07216e-12		ZNF689	16p11.2	-0.261382	1.19241e-13	1.73406e-12
	MCCC1	3q27.1	0.260328	1.50602e-13	2.14343e-12		TMEM128	4p16.3	-0.261374	1.19463e-13	1.73603e-12
	KCMF1	2p11.2	0.260246	1.53328e-13	2.17913e-12		CHM	Xq21.2	-0.261312	1.21111e-13	1.75743e-12
	TPD52L2	20q13.33	0.260226	1.54017e-13	2.18737e-12		DYNC2H1	11q22.3	-0.261138	1.25878e-13	1.82174e-12
	PERM1	1p36.33	0.260108	1.58092e-13	2.24048e-12		MEGF9	9q33.2	-0.261114	1.26531e-13	1.82945e-12
	ERP44	9q31.1	0.26	1.61902e-13	2.28835e-12		MTREX	5q11.2	-0.261038	1.28705e-13	1.85819e-12
	ELOVL1	1p34.2	0.259999	1.61927e-13	2.28835e-12		SAMD15	14q24.3	-0.260701	1.38677e-13	1.99211e-12
	GGT3P	22q11.21	0.259754	1.70939e-13	2.41061e-12		ZNF619	3p22.1	-0.260552	1.43304e-13	2.0527e-12
	NOTCH1	9q34.3	0.259473	1.81859e-13	2.56279e-12		TMEM181	6q25.3	-0.260494	1.45164e-13	2.07216e-12
	FDX1	11q22.3	0.259358	1.86511e-13	2.62281e-12		VEZT	12q22	-0.260494	1.45181e-13	2.07216e-12
	RAB33A	Xq26.1	0.259298	1.88987e-13	2.65576e-12		GRIA1	5q33.2	-0.260435	1.47077e-13	2.09773e-12
	CTSD	11p15.5	0.259204	1.92926e-13	2.70922e-12		TIGD4	4q31.3	-0.260362	1.49457e-13	2.13016e-12
	TEX261	2p13.3	0.25918	1.9397e-13	2.72196e-12		SAP30L	5q33.2	-0.260346	1.50006e-13	2.13646e-12
	STAC	3p22.3-p22.2	0.259125	1.96315e-13	2.75138e-12		CCDC126	7p15.3	-0.260324	1.50737e-13	2.14383e-12
	CCL18	17q12	0.259124	1.9634e-13	2.75138e-12		ANXA9	1q21.3	-0.260213	1.54455e-13	2.19204e-12
	HLA-E	6p22.1	0.25903	2.00453e-13	2.80312e-12		MRFAP1	4p16.1	-0.260184	1.55457e-13	2.2047e-12
	PABPC4	1p34.3	0.258907	2.05944e-13	2.87789e-12		ARMC9	2q37.1	-0.260071	1.59394e-13	2.25733e-12
	ARRDC5	19p13.3	0.258851	2.0849e-13	2.90941e-12		DOK1	2p13.1	-0.260042	1.60415e-13	2.27019e-12
	PGBD2	1q	0.25882	2.09912e-13	2.92315e-12		TMEM9B	11p15.4	-0.259996	1.62048e-13	2.28845e-12
	VLDLR	9p24.2	0.258571	2.21689e-13	3.08501e-12		GAMT	19p13.3	-0.259756	1.70856e-13	2.41061e-12
	C11ORF86	11q13.2	0.258425	2.28937e-13	3.18366e-12		PANK3	5q34	-0.259463	1.8223e-13	2.56622e-12
	CCL8	17q12	0.258197	2.4065e-13	3.33959e-12		GGNBP2	17q12	-0.259456	1.82534e-13	2.56869e-12
	FBXL6	8q24.3	0.258129	2.44271e-13	3.38514e-12		KSR2	12q24.22-q24.23	-0.25912	1.96536e-13	2.75219e-12
	CCNYL1	2q33.3	0.257896	2.57038e-13	3.55468e-12		UVSSA	4p16.3	-0.259094	1.97633e-13	2.76562e-12
	SLC16A10	6q21	0.257835	2.60462e-13	3.59707e-12		SELENOT	3q25.1	-0.258892	2.06638e-13	2.88558e-12
	MUC21	6p21.33	0.257684	2.69224e-13	3.71296e-12		TRIM44	11p13	-0.258826	2.09663e-13	2.92297e-12
	CHCHD10	22q11.23	0.257665	2.70349e-13	3.72447e-12		MREG	2q35	-0.258824	2.09753e-13	2.92297e-12
	PLA2G7	6p12.3	0.257483	2.81318e-13	3.86644e-12		FAM102A	9q34.11	-0.258376	2.31381e-13	3.21541e-12
	FUT4	11q21	0.257418	2.85305e-13	3.91317e-12		BSDC1	1p35.1	-0.25821	2.39941e-13	3.33205e-12
	HLA-DOB	6p21.32	0.257315	2.91801e-13	3.99469e-12		MTCL1	18p11.22	-0.258193	2.40867e-13	3.34028e-12
	ACKR4	3q22.1	0.257314	2.91847e-13	3.99469e-12		LZTFL1	3p21.31	-0.258032	2.49503e-13	3.45497e-12
	LY6K	8q24.3	0.25731	2.92144e-13	3.99602e-12		PLEKHB2	2q21.1	-0.258029	2.49655e-13	3.45497e-12
	TPD52L1	6q22-q23	0.257238	2.96756e-13	4.05357e-12		SERF1A	5q13.2	-0.257875	2.58204e-13	3.56834e-12
	KLRD1	12p13.2	0.257192	2.9976e-13	4.09182e-12		GFRA1	10q25.3	-0.257706	2.67929e-13	3.69764e-12
	QRFP	9q34.12	0.257065	3.0817e-13	4.20375e-12		CFAP46	10q26.3	-0.257663	2.70431e-13	3.72447e-12
	EI24	11q24.2	0.257029	3.10575e-13	4.2308e-12		ZCCHC10	5q31.1	-0.257638	2.71932e-13	3.74257e-12
	FHL3	1p34.3	0.256973	3.14404e-13	4.27713e-12		PLPPR3	19p13.3	-0.257611	2.73532e-13	3.762e-12
	GZMB	14q12	0.256932	3.17187e-13	4.31206e-12		NRIP1	21q11.2-q21.1	-0.257461	2.82669e-13	3.87994e-12
	STAC2	17q12	0.256884	3.20556e-13	4.35491e-12		DNAJC16	1p36.21	-0.25746	2.82688e-13	3.87994e-12
	EPHB2	1p36.12	0.256795	3.2683e-13	4.43413e-12		CBR4	4q32.3	-0.257317	2.91696e-13	3.99469e-12
	MED27	9q34.13	0.256786	3.27443e-13	4.43944e-12		CLCN3	4q33	-0.257272	2.94576e-13	4.02654e-12
	RCC1	1p35.3	0.256779	3.27966e-13	4.44352e-12		NSRP1	17q11.2	-0.257029	3.10552e-13	4.2308e-12
	RHOV	15q15.1	0.256675	3.35451e-13	4.53572e-12		TUBG2	17q21.2	-0.257005	3.12184e-13	4.24981e-12
	ADA	20q13.12	0.256632	3.38597e-13	4.57209e-12		UBE3B	12q24.11	-0.256818	3.25193e-13	4.41491e-12
	EVA1A	2p12	0.256616	3.3976e-13	4.58162e-12		PPIP5K2	5q21.1	-0.256773	3.28353e-13	4.44575e-12
	CX3CL1	16q21	0.25659	3.41738e-13	4.60209e-12		BAZ2B	2q24.2	-0.256686	3.34665e-13	4.52816e-12
	APOBEC3A	22q13.1	0.25651	3.47681e-13	4.67583e-12		CCDC173	2q31.1	-0.256653	3.37038e-13	4.55411e-12
	SMTN	22q12.2	0.256466	3.51061e-13	4.71495e-12		SUPT6H	17q11.2	-0.256618	3.39649e-13	4.58162e-12
	PDE9A	21q22.3	0.256424	3.54299e-13	4.75526e-12		ZXDA	Xp11.21	-0.256604	3.40648e-13	4.5905e-12
	CTLA4	2q33.2	0.255865	3.99967e-13	5.34668e-12		SCUBE2	11p15.4	-0.256561	3.4385e-13	4.62742e-12
	CLEC7A	12p13.2	0.255734	4.11479e-13	5.48959e-12		RBM24	6p22.3	-0.256481	3.49876e-13	4.70219e-12
	BCL2L14	12p13.2	0.255713	4.13318e-13	5.51044e-12		OSCP1	1p34.3	-0.256329	3.6164e-13	4.85053e-12
	C1R	12p13.31	0.255649	4.19111e-13	5.58396e-12		PAN2	12q13.3	-0.25625	3.67944e-13	4.93177e-12
	MAGEA5	Xq28	0.25564	4.19987e-13	5.59192e-12		AATK	17q25.3	-0.256115	3.78856e-13	5.07464e-12
	PLEKHO1	1q21.2	0.255554	4.27879e-13	5.69321e-12		VAMP2	17p13.1	-0.256048	3.8441e-13	5.14559e-12
	RAET1K	6q25.1	0.255468	4.3589e-13	5.7921e-12		TTC21B	2q24.3	-0.255884	3.98334e-13	5.32841e-12
	F5	1q24.2	0.255447	4.37831e-13	5.81403e-12		RNF103	2p11.2	-0.255852	4.01077e-13	5.35794e-12
	RAB43	3q21.3	0.255438	4.38671e-13	5.82133e-12		TUBA3E	2q21.1	-0.255835	4.02536e-13	5.37385e-12
	C8ORF76	8q24.13	0.255292	4.52832e-13	6.00527e-12		EFCC1	3q21.3	-0.255532	4.29893e-13	5.71621e-12
	CXCL11	4q21.1	0.255274	4.54538e-13	6.0239e-12		MTMR7	8p22	-0.25515	4.66926e-13	6.17991e-12
	LSM2	6p21.33	0.255189	4.62975e-13	6.13166e-12		C9ORF116	9q34.3	-0.255131	4.68854e-13	6.19723e-12
	ATP5MG	11q23.3	0.255144	4.67558e-13	6.18418e-12		MBD5	2q23.2	-0.254998	4.82498e-13	6.36916e-12
	ADAMTSL4	1q21.2	0.255024	4.79756e-13	6.33714e-12		FLT3	13q12.2	-0.254961	4.86408e-13	6.41654e-12
	GGCX	2p11.2	0.254831	5.0016e-13	6.58928e-12		DGKE	17q22	-0.254851	4.98043e-13	6.56571e-12
	PTGDS	9q34.3	0.254789	5.04811e-13	6.64618e-12		ZNF174	16p13.3	-0.254733	5.10907e-13	6.72202e-12
	EREG	4q13.3	0.254683	5.16486e-13	6.79096e-12		BBS10	12q21.2	-0.254631	5.22294e-13	6.86282e-12
	RPL39L	3q27.3	0.254487	5.38738e-13	7.06498e-12		SYT1	12q21.2	-0.254568	5.29431e-13	6.95203e-12
	TMEM171	5q13.2	0.254397	5.49311e-13	7.18951e-12		LCA5	6q14.1	-0.254517	5.3524e-13	7.0237e-12
	RPP40	6p25.1	0.254229	5.69519e-13	7.44913e-12		PDE6B	4p16.3	-0.254471	5.40536e-13	7.08392e-12
	RCC2	1p36.13	0.254049	5.92013e-13	7.7282e-12		STXBP4	17q22	-0.254441	5.44103e-13	7.12601e-12
	CFTR	7q31.2	0.254045	5.92497e-13	7.72948e-12		KIAA0319L	1p34.3	-0.254201	5.72997e-13	7.48972e-12
	CLTCL1	22q11.21	0.254007	5.97352e-13	7.77256e-12		CDKN1B	12p13.1	-0.254127	5.8218e-13	7.6048e-12
	SFT2D2	1q24.2	0.253975	6.01436e-13	7.82062e-12		TCEAL6	Xq22.1	-0.254038	5.93386e-13	7.73016e-12
	RASAL2-AS1	1q25.2	0.253956	6.03957e-13	7.84322e-12		SFXN5	2p13.2	-0.254038	5.93437e-13	7.73016e-12
	ATP5MF	7q22.1	0.253932	6.07079e-13	7.87865e-12		DYNLT3	Xp11.4	-0.254036	5.93707e-13	7.73016e-12
	ETV6	12p13.2	0.253905	6.10599e-13	7.9192e-12		CFAP57	1p34.2	-0.253958	6.03734e-13	7.84322e-12
	RGL1	1q25.3	0.253899	6.11387e-13	7.92429e-12		NF1	17q11.2	-0.25385	6.17931e-13	7.99359e-12
	DTD1	20p11.23	0.253861	6.16469e-13	7.98499e-12		PIGG	4p16.3	-0.253755	6.30576e-13	8.14664e-12
	GMDS	6p25.3	0.253852	6.17623e-13	7.99359e-12		KCTD2	17q25.1	-0.253737	6.32994e-13	8.16733e-12
	COLCA2	11q23.1	0.25378	6.27172e-13	8.10789e-12		SS18	18q11.2	-0.253579	6.54917e-13	8.4339e-12
	FSCN1	7p22.1	0.253744	6.32125e-13	8.16138e-12		PAN3	13q12.2	-0.253529	6.62012e-13	8.51979e-12
	TNNT2	1q32.1	0.253592	6.5311e-13	8.42145e-12		PPP1R26	9q34.3	-0.253425	6.76936e-13	8.69509e-12
	CHST12	7p22.3	0.253581	6.54647e-13	8.4339e-12		TNRC6C	17q25.3	-0.253369	6.85091e-13	8.78856e-12
	MFGE8	15q26.1	0.253507	6.6512e-13	8.55429e-12		MARVELD2	5q13.2	-0.253365	6.85647e-13	8.79006e-12
	RHBDL2	1p34.3	0.253452	6.72951e-13	8.64944e-12		UTP14C	13q14.3	-0.25326	7.01291e-13	8.98487e-12
	SLC12A8	3q21.2	0.25341	6.79091e-13	8.71718e-12		FAM161B	14q24.3	-0.25314	7.19508e-13	9.20648e-12
	INTS6L	Xq26.3	0.253204	7.09745e-13	9.08737e-12		ZNF709	19p13.2	-0.25298	7.4465e-13	9.50996e-12
	CDCA7	2q31.1	0.25309	7.27243e-13	9.29951e-12		HCAR1	12q24.31	-0.252867	7.62788e-13	9.73539e-12
	PTPN14	1q32.3-q41	0.253073	7.29979e-13	9.32855e-12		PHLPP1	18q21.33	-0.252653	7.9858e-13	1.01647e-11
	CLPSL1	6p21.31	0.252854	7.649e-13	9.75613e-12		NEK4	3p21.1	-0.252651	7.98975e-13	1.01647e-11
	PSMG3	7p22.3	0.252846	7.66335e-13	9.76821e-12		CGRRF1	14q22.2	-0.252648	7.99469e-13	1.01647e-11
	MESP2	15q26.1	0.252736	7.84456e-13	9.99283e-12		RUFY2	10q21.3	-0.252606	8.0656e-13	1.02483e-11
	CASP14	19p13.12	0.252404	8.42175e-13	1.06805e-11		SLF2	10q24.31	-0.252509	8.23611e-13	1.04583e-11
	ATG3	3q13.2	0.252324	8.56711e-13	1.08511e-11		PTPRT	20q12-q13.11	-0.252441	8.3559e-13	1.06037e-11
	FOXP3	Xp11.23	0.252253	8.69773e-13	1.10027e-11		HCN1	5p12	-0.252373	8.47782e-13	1.07448e-11
	KLK6	19q13.41	0.252064	9.05691e-13	1.14281e-11		SLC25A38	3p22.1	-0.252321	8.57271e-13	1.08514e-11
	RRP36	6p21.1	0.252011	9.15807e-13	1.15485e-11		ZDHHC21	9p22.3	-0.252243	8.71718e-13	1.10203e-11
	SDHA	5p15.33	0.25189	9.39855e-13	1.18369e-11		TMBIM6	12q13.12	-0.252232	8.73646e-13	1.10377e-11
	ICOS	2q33.2	0.251807	9.56523e-13	1.20316e-11		CAPS2	12q21.1-q21.2	-0.252134	8.92086e-13	1.12636e-11
	IL36RN	2q14.1	0.251795	9.58948e-13	1.20494e-11		CALCOCO1	12q13.13	-0.251973	9.23277e-13	1.16354e-11
	ANKRD34A	1q21.1	0.251794	9.5914e-13	1.20494e-11		EFCAB12	3q21.3	-0.251856	9.46623e-13	1.19146e-11
	C2ORF72	2q37.1	0.251754	9.67438e-13	1.21384e-11		USP6	17p13.2	-0.251779	9.6222e-13	1.20805e-11
	CCL13	17q12	0.251691	9.80593e-13	1.22881e-11		CCNI	4q21.1	-0.25174	9.7028e-13	1.21665e-11
	EN2	7q36.3	0.251635	9.92309e-13	1.24271e-11		KIF16B	20p12.1	-0.25149	1.02326e-12	1.27828e-11
	ISL2	15q24.3	0.251629	9.93611e-13	1.24357e-11		COQ7	16p12.3	-0.251343	1.0559e-12	1.3174e-11
	ANGPTL6	19p13.2	0.251587	1.0024e-12	1.25378e-11		C3ORF52	3q13.2	-0.251283	1.06942e-12	1.33344e-11
	DSC2	18q12.1	0.251524	1.01597e-12	1.26996e-11		MBD1	18q21.1	-0.251106	1.11036e-12	1.38351e-11
	TSPO	22q13.2	0.25147	1.02764e-12	1.28295e-11		LRP2	2q31.1	-0.251104	1.11095e-12	1.38351e-11
	KRT78	12q13.13	0.251079	1.11681e-12	1.38994e-11		DPY19L2P1	7p14.2	-0.251051	1.12346e-12	1.39582e-11
	KLF11	2p25.1	0.251068	1.11935e-12	1.39223e-11		EXOC6	10q23.33	-0.25081	1.18236e-12	1.46514e-11
	IL21R	16p12.1	0.25105	1.12363e-12	1.39582e-11		C9ORF129	9q22.31	-0.250611	1.23329e-12	1.52542e-11
	TFRC	3q29	0.251033	1.12774e-12	1.40006e-11		BCAS3	17q23.2	-0.250342	1.30571e-12	1.61049e-11
	RGS2	1q31.2	0.251001	1.13537e-12	1.40866e-11		UBFD1	16p12.2	-0.250227	1.33764e-12	1.64434e-11
	SEPTIN6	Xq24	0.250892	1.16191e-12	1.44069e-11		PATZ1	22q12.2	-0.250153	1.35877e-12	1.66827e-11
	PRDX4	Xp22.11	0.250788	1.18799e-12	1.47121e-11		RAB5B	12q13.2	-0.249908	1.4311e-12	1.7485e-11
	KLK7	19q13.41	0.250688	1.21345e-12	1.50181e-11		ATP8B1	18q21.31	-0.2499	1.43337e-12	1.7502e-11
	PART1	5q12.1	0.250546	1.25044e-12	1.54568e-11		CFAP97	4q35.1	-0.249665	1.50634e-12	1.83594e-11
	TCAF2	7q35	0.250538	1.25239e-12	1.54714e-11		LETMD1	12q13.12	-0.249503	1.55869e-12	1.89168e-11
	RHCG	15q26.1	0.250365	1.29925e-12	1.60404e-11		FYB2	1p32.2	-0.249341	1.61296e-12	1.95518e-11
	AMD1	6q21	0.25034	1.30609e-12	1.61049e-11		LAMTOR3	4q23	-0.249181	1.66828e-12	2.01979e-11
	DONSON	21q22.11	0.250316	1.31274e-12	1.61769e-11		KLHDC9	1q23.3	-0.249138	1.68343e-12	2.03691e-11
	LINC01554	5q15	0.250288	1.32049e-12	1.62625e-11		MZF1	19q13.43	-0.2489	1.7697e-12	2.13484e-11
	ABTB2	11p13	0.250274	1.32458e-12	1.63028e-11		ZNF594	17p13.2	-0.248859	1.78526e-12	2.15231e-11
	SUSD2	22q11.23	0.250268	1.32611e-12	1.63116e-11		BCAM	19q13.32	-0.248701	1.84553e-12	2.22095e-11
	LYNX1	8q24.3	0.250205	1.34402e-12	1.65116e-11		PYY	17q21.31	-0.248624	1.87565e-12	2.2545e-11
	XG	Xp22.33	0.250104	1.37305e-12	1.68476e-11		NLRP8	19q13.43	-0.248449	1.94572e-12	2.33539e-11
	TNFRSF12A	16p13.3	0.250035	1.39326e-12	1.70852e-11		IGSF9B	11q25	-0.248286	2.01335e-12	2.41276e-11
	FAM118A	22q13.31	0.249961	1.41498e-12	1.73409e-11		EMBP1	1p11.2	-0.248242	2.03218e-12	2.43242e-11
	PBX4	19p13.11	0.249954	1.41726e-12	1.73483e-11		CDKN2AIPNL	5q31.1	-0.248154	2.06981e-12	2.47599e-11
	IL10	1q32.1	0.249954	1.41732e-12	1.73483e-11		CFAP69	7q21.13	-0.248101	2.09294e-12	2.50215e-11
	TMEM158	3p21.31	0.249948	1.41914e-12	1.736e-11		GPRASP2	Xq22.1	-0.248035	2.12196e-12	2.53382e-11
	INA	10q24.33	0.249925	1.42585e-12	1.74314e-11		ETNPPL	4q25	-0.247962	2.15492e-12	2.57165e-11
	CCL17	16q21	0.249774	1.47202e-12	1.7963e-11		FAM110B	8q12.1	-0.247938	2.16557e-12	2.58128e-11
	DKKL1	19q13.33	0.249668	1.50543e-12	1.83594e-11		NEDD1	12q23.1	-0.247832	2.21407e-12	2.63595e-11
	CTSL	9q21.33	0.249655	1.5097e-12	1.83892e-11		ARF3	12q13.12	-0.247786	2.23556e-12	2.65522e-11
	YKT6	7p13	0.249601	1.52678e-12	1.85858e-11		BRAP	12q24.12	-0.247606	2.32152e-12	2.75079e-11
	QKI	6q26	0.249589	1.53066e-12	1.86124e-11		SEC24B	4q25	-0.247577	2.33579e-12	2.76607e-11
	EPHA1	7q34-q35	0.249589	1.53082e-12	1.86124e-11		NUCB2	11p15.1	-0.247524	2.36153e-12	2.7916e-11
	SPRY3	Xq28 and Yq12	0.249516	1.5545e-12	1.88889e-11		ZNF445	3p21.31	-0.247064	2.59954e-12	3.0603e-11
	SYCE1L	16q23.1	0.249508	1.55716e-12	1.89098e-11		ZSCAN32	16p13.3	-0.246864	2.7102e-12	3.18496e-11
	CPNE8	12q12	0.249484	1.56491e-12	1.89808e-11		NCOR2	12q24.31	-0.24684	2.72424e-12	3.19959e-11
	APBA2	15q13.1	0.249315	1.62188e-12	1.9648e-11		CCDC24	1p34.1	-0.246781	2.75753e-12	3.23678e-11
	EGLN3	14q13.1	0.249115	1.69169e-12	2.04565e-11		ADAMTS15	11q24.3	-0.24663	2.846e-12	3.33672e-11
	CD79B	17q23.3	0.248977	1.74125e-12	2.10432e-11		DEFB132	20p13	-0.246617	2.85346e-12	3.3435e-11
	CRYBG1	6q21	0.248948	1.75191e-12	2.11592e-11		SLC25A46	5q22.1	-0.246363	3.00832e-12	3.51879e-11
	LPXN	11q12.1	0.248929	1.75917e-12	2.12341e-11		CA14	1q21.2	-0.246349	3.01701e-12	3.52689e-11
	SLC38A5	Xp11.23	0.248769	1.81911e-12	2.1918e-11		AFF4	5q31.1	-0.246235	3.08977e-12	3.60563e-11
	PGLYRP4	1q21.3	0.248711	1.84155e-12	2.2175e-11		GUSBP3	5q13.2	-0.246224	3.09675e-12	3.61167e-11
	POMC	2p23.3	0.248685	1.85154e-12	2.22685e-11		IKZF4	12q13.2	-0.246072	3.19624e-12	3.71472e-11
	CCNE1	19q12	0.248548	1.90563e-12	2.28916e-11		ZNF180	19q13.31	-0.245926	3.29439e-12	3.81551e-11
	EFNA5	5q21.3	0.248447	1.94645e-12	2.33539e-11		CARD10	22q13.1	-0.245809	3.37508e-12	3.90219e-11
	MDGA2	14q21.3	0.248346	1.9882e-12	2.38405e-11		GOLGB1	3q13.33	-0.245741	3.42335e-12	3.95116e-11
	FNDC4	2p23.3	0.248246	2.03043e-12	2.43177e-11		USP8	15q21.2	-0.245698	3.45405e-12	3.9843e-11
	ANKS4B	16p12.2	0.248052	2.1145e-12	2.52643e-11		SNURF	15q11.2	-0.245646	3.49157e-12	4.02462e-11
	NUDT1	7p22.3	0.247953	2.15902e-12	2.57501e-11		ZNF484	9q22.31	-0.245377	3.69171e-12	4.23648e-11
	VSNL1	2p24.2	0.247918	2.1747e-12	2.59063e-11		GDPD1	17q22	-0.245347	3.71407e-12	4.25482e-11
	TMEM92	17q21.33	0.247813	2.22319e-12	2.64473e-11		GGT7	20q11.22	-0.245288	3.76018e-12	4.30272e-11
	MYCNOS	2p24.3	0.247811	2.22408e-12	2.64473e-11		TRIM66	11p15.4	-0.245283	3.76374e-12	4.30434e-11
	RFC2	7q11.23	0.247789	2.23427e-12	2.65522e-11		ZNF586	19q13.43	-0.245164	3.85813e-12	4.40222e-11
	LTA	6p21.33	0.247732	2.26111e-12	2.68397e-11		GPR139	16p12.3	-0.245015	3.97851e-12	4.52926e-11
	PRSS41	16p13.3	0.247658	2.29632e-12	2.72415e-11		RAMP2-AS1	17q21.2	-0.244933	4.0461e-12	4.59575e-11
	PRG2	11q12.1	0.247643	2.30367e-12	2.73126e-11		SLC35E2B	1p36.33	-0.244769	4.18591e-12	4.74648e-11
	DERL3	22q11.23	0.247557	2.3453e-12	2.77568e-11		XPA	9q22.33	-0.244725	4.22435e-12	4.78465e-11
	GBP1P1	1p22.2	0.247553	2.34744e-12	2.77658e-11		PRDX3	10q26.11	-0.244687	4.257e-12	4.81891e-11
	IRX6	16q12.2	0.247501	2.37312e-12	2.80364e-11		SERINC1	6q22.31	-0.244681	4.26264e-12	4.82256e-11
	CCNY	10p11.21	0.247495	2.37613e-12	2.80554e-11		EZH1	17q21.2	-0.244674	4.26918e-12	4.82723e-11
	BID	22q11.21	0.247424	2.41125e-12	2.84534e-11		PCYOX1L	5q32	-0.244616	4.32022e-12	4.88219e-11
	COL13A1	10q22.1	0.247285	2.48243e-12	2.9276e-11		KLHL23	2q31.1	-0.244489	4.43473e-12	5.00313e-11
	CHST3	10q22.1	0.247189	2.53275e-12	2.98519e-11		ZNF442	19p13.2	-0.244461	4.46031e-12	5.02915e-11
	HAUS8	19p13.11	0.247103	2.57869e-12	3.03754e-11		ACTR8	3p21.1	-0.24445	4.47079e-12	5.0353e-11
	OXER1	2p21	0.24702	2.62378e-12	3.08703e-11		ANOS1	Xp22.31	-0.244259	4.6506e-12	5.2202e-11
	PDAP1	7q22.1	0.246891	2.69511e-12	3.16908e-11		TTC17	11p12-p11.2	-0.244256	4.65359e-12	5.22063e-11
	TNFRSF8	1p36.22	0.246708	2.80017e-12	3.2849e-11		NOS1AP	1q23.3	-0.24424	4.66861e-12	5.22869e-11
	LMO4	1p22.3	0.246458	2.94974e-12	3.45431e-11		GLUD2	Xq24	-0.244115	4.7907e-12	5.35345e-11
	CD7	17q25.3	0.246382	2.99633e-12	3.50681e-11		RBM39	20q11.22	-0.243919	4.98768e-12	5.56425e-11
	CCL2	17q12	0.246314	3.03937e-12	3.55096e-11		C1ORF220	1q25.2	-0.243806	5.10415e-12	5.68468e-11
	TMSB4XP8	4q22.1	0.246304	3.04549e-12	3.55603e-11		PI4KA	22q11.21	-0.243801	5.10998e-12	5.68802e-11
	ARID3C	9p13.3	0.246215	3.10251e-12	3.61628e-11		ACER2	9p22.1	-0.243718	5.1983e-12	5.77669e-11
	FAM225A	9q32	0.246198	3.11309e-12	3.62651e-11		TNS2	12q13.13	-0.243712	5.20472e-12	5.78062e-11
	AIM2	1q23.1-q23.2	0.246155	3.14156e-12	3.65754e-11		DCTD	4q35.1	-0.243579	5.34819e-12	5.92681e-11
	PHKG1	7p11.2	0.246123	3.16242e-12	3.67969e-11		PRKCE	2p21	-0.243546	5.38449e-12	5.96044e-11
	PSMG1	21q22.2	0.246087	3.18578e-12	3.70472e-11		MPHOSPH8	13q12.11	-0.243451	5.49084e-12	6.07481e-11
	ABHD11	7q11.23	0.246046	3.21295e-12	3.73198e-11		HECTD2	10q23.32	-0.243414	5.53268e-12	6.11097e-11
	RND3	2q23.3	0.24604	3.21701e-12	3.73453e-11		HERC2	15q13.1	-0.243273	5.69545e-12	6.28079e-11
	SMYD2	1q32.3	0.245979	3.2585e-12	3.7805e-11		SLC5A10	17p11.2	-0.243265	5.70413e-12	6.28647e-11
	SUV39H2	10p13	0.245958	3.27225e-12	3.79426e-11		SERP2	13q14.11	-0.243247	5.72572e-12	6.3068e-11
	MTHFD2	2p13.1	0.245935	3.28827e-12	3.81062e-11		CIRBP	19p13.3	-0.243218	5.7592e-12	6.33322e-11
	COL4A3	2q36.3	0.245915	3.30166e-12	3.82172e-11		FNDC3A	13q14.2	-0.243153	5.83718e-12	6.41193e-11
	RPS7	2p25.3	0.245885	3.32246e-12	3.84357e-11		FCRLB	1q23.3	-0.243064	5.94426e-12	6.51526e-11
	BACH2	6q15	0.245783	3.39361e-12	3.92136e-11		ZNF671	19q13.43	-0.243052	5.95936e-12	6.52824e-11
	RHEB	7q36.1	0.245762	3.40852e-12	3.93632e-11		ASTN2	9q33.1	-0.243027	5.99004e-12	6.55826e-11
	HPSE	4q21.23	0.245644	3.49303e-12	4.02462e-11		C17ORF80	17q25.1	-0.243	6.02342e-12	6.5912e-11
	GPN1	2p23.3	0.245634	3.49981e-12	4.03012e-11		TRIM52	5q35.3	-0.242931	6.10915e-12	6.67407e-11
	VEPH1	3q25.31-q25.32	0.245616	3.51329e-12	4.04331e-11		ARMCX5	Xq22.1	-0.242874	6.181e-12	6.74521e-11
	PSMD7	16q23.1	0.245527	3.57852e-12	4.11602e-11		ATP1A1-AS1	1p13.1	-0.24276	6.32605e-12	6.89223e-11
	FXYD2	11q23.3	0.245436	3.64673e-12	4.19206e-11		MRPL10	17q21.32	-0.242674	6.4386e-12	7.00722e-11
	NKD1	16q12.1	0.245415	3.66249e-12	4.20777e-11		ENO2	12p13.31	-0.24266	6.45695e-12	7.02338e-11
	PLA2G2A	1p36.13	0.245409	3.66673e-12	4.21022e-11		DNMBP	10q24.2	-0.242563	6.58712e-12	7.16108e-11
	EPGN	4q13.3	0.245373	3.69465e-12	4.23742e-11		PDK2	17q21.33	-0.242389	6.82431e-12	7.40687e-11
	VWCE	11q12.2	0.245358	3.70627e-12	4.24832e-11		MRNIP	5q35.3	-0.242368	6.85454e-12	7.42761e-11
	IGF2BP3	7p15.3	0.245335	3.72329e-12	4.26294e-11		ZNF136	19p13.2	-0.242356	6.87053e-12	7.43688e-11
	ANKRD35	1q21.1	0.24527	3.77431e-12	4.31396e-11		SLC16A5	17q25.1	-0.24234	6.89342e-12	7.45763e-11
	PNOC	8p21.1	0.245234	3.80254e-12	4.34375e-11		KIAA0825	5q15	-0.242328	6.91036e-12	7.47192e-11
	CMAHP	6p22.3	0.245212	3.81994e-12	4.36114e-11		CASC2	10q26.11	-0.242304	6.94427e-12	7.50049e-11
	PSME4	2p16.2	0.245086	3.92089e-12	4.47129e-11		MEAF6	1p34.3	-0.242257	7.01078e-12	7.55602e-11
	BIRC7	20q13.33	0.245063	3.93887e-12	4.48923e-11		ELOVL2	6p24.2	-0.242188	7.11139e-12	7.64799e-11
	NCS1	9q34.11	0.245057	3.94388e-12	4.49239e-11		KAT7	17q21.33	-0.242178	7.12488e-12	7.65839e-11
	RPS20	8q12.1	0.245011	3.9816e-12	4.5302e-11		CCDC125	5q13.2	-0.241994	7.39858e-12	7.92281e-11
	TACSTD2	1p32.1	0.245005	3.98667e-12	4.5334e-11		PRIMPOL	4q35.1	-0.241906	7.53138e-12	8.05641e-11
	MAP3K8	10p11.23	0.244959	4.02504e-12	4.57442e-11		GPER1	7p22.3	-0.241871	7.58535e-12	8.10981e-11
	BUD13	11q23.3	0.244907	4.06869e-12	4.6188e-11		LINC00574	6q27	-0.241868	7.59086e-12	8.11136e-11
	F11R	1q23.3	0.244855	4.112e-12	4.66531e-11		ZBTB7A	19p13.3	-0.241599	8.01826e-12	8.53165e-11
	TULP1	6p21.31	0.244764	4.18988e-12	4.74829e-11		MYO6	6q14.1	-0.24159	8.03357e-12	8.5434e-11
	GFRA3	5q31.2	0.244588	4.34559e-12	4.90809e-11		GOSR1	17q11.2	-0.241583	8.04425e-12	8.55021e-11
	PIM1	6p21.2	0.244581	4.35165e-12	4.91217e-11		ZFP62	5q35.3	-0.241578	8.05245e-12	8.5544e-11
	SPATA12	3p14.3	0.244456	4.46503e-12	5.03164e-11		MISP	19p13.3	-0.241524	8.14068e-12	8.64354e-11
	LINC01587	4p16.2	0.244397	4.52023e-12	5.08812e-11		CRBN	3p26.2	-0.241511	8.16335e-12	8.66301e-11
	PTGIR	19q13.32	0.244366	4.5491e-12	5.11552e-11		SH3GLB2	9q34.11	-0.241315	8.49446e-12	8.99532e-11
	ADPRS	1p34.3	0.244365	4.54969e-12	5.11552e-11		VWA8	13q14.11	-0.24129	8.5386e-12	9.03251e-11
	SGSM3	22q13.1	0.24431	4.6014e-12	5.17076e-11		KIAA1328	18q12.2	-0.240888	9.26541e-12	9.78491e-11
	SLC25A37	8p21.2	0.244297	4.61367e-12	5.18165e-11		ZNF233	19q13.31	-0.240824	9.38633e-12	9.8927e-11
	RTL8B	Xq26.3	0.244244	4.66423e-12	5.22713e-11		MYG1	12q13.13	-0.240779	9.47216e-12	9.97791e-11
	GPR12	13q12.13	0.244244	4.66461e-12	5.22713e-11		MROH8	20q11.23	-0.240701	9.624e-12	1.01325e-10
	LCK	1p35.2	0.244233	4.67536e-12	5.23331e-11		ZNF446	19q13.43	-0.240643	9.73603e-12	1.02397e-10
	INTS8	8q22.1	0.244216	4.69126e-12	5.24818e-11		GNG3	11q12.3	-0.240429	1.0168e-11	1.0666e-10
	OLAH	10p13	0.244138	4.76729e-12	5.33026e-11		USP14	18p11.32	-0.240423	1.01804e-11	1.06735e-10
	KCNJ15	21q22.13-q22.2	0.244069	4.83625e-12	5.40133e-11		MAPK8IP2	22q13.33	-0.240365	1.03015e-11	1.07947e-10
	C5ORF46	5q32	0.244053	4.85183e-12	5.41571e-11		WDFY3	4q21.23	-0.240336	1.03606e-11	1.0851e-10
	EMILIN2	18p11.32-p11.31	0.243828	5.08169e-12	5.66597e-11		RAPGEF4	2q31.1	-0.240257	1.05289e-11	1.101e-10
	SLCO4A1-AS1	20q13.33	0.243814	5.09586e-12	5.67861e-11		ENPP5	6p21.1	-0.240198	1.06541e-11	1.11235e-10
	STK17B	2q32.3	0.243719	5.19643e-12	5.77669e-11		C16ORF46	16q23.2	-0.240086	1.08989e-11	1.13554e-10
	PAPSS2	10q23.2-q23.31	0.243719	5.19693e-12	5.77669e-11		PRMT3	11p15.1	-0.240062	1.09532e-11	1.1406e-10
	ARHGAP5-AS1	14q12	0.243709	5.20781e-12	5.78084e-11		RAP1GDS1	4q23	-0.240032	1.10191e-11	1.14628e-10
	CXCL17	19q13.2	0.243634	5.28851e-12	5.86717e-11		LRRC46	17q21.32	-0.239909	1.12966e-11	1.17331e-10
	LNP1	3q12.2	0.243623	5.29987e-12	5.87652e-11		CYB5R1	1q32.1	-0.239881	1.136e-11	1.17867e-10
	CCL5	17q12	0.243563	5.36615e-12	5.94342e-11		NIPA1	15q11.2	-0.23968	1.18297e-11	1.22234e-10
	CXCL1	4q13.3	0.243443	5.49965e-12	6.0812e-11		UBXN10	1p36.12	-0.239664	1.18684e-11	1.22571e-10
	CD38	4p15.32	0.24344	5.50362e-12	6.08223e-11		FUZ	19q13.33	-0.239654	1.18922e-11	1.22753e-10
	ESRRA	11q13.1	0.2433	5.66347e-12	6.25199e-11		SERPINA3	14q32.13	-0.239613	1.19921e-11	1.2372e-10
	HGH1	8q24.3	0.243272	5.69584e-12	6.28079e-11		NOSTRIN	2q24.3	-0.239559	1.21221e-11	1.24869e-10
	FPR2	19q13.41	0.243225	5.75188e-12	6.33199e-11		ZNF264	19q13.43	-0.239553	1.21374e-11	1.24898e-10
	DUSP7	3p21.2	0.243222	5.75491e-12	6.33199e-11		FAM227B	15q21.2	-0.239484	1.23083e-11	1.26462e-10
	TMEM41A	3q27.2	0.2432	5.78048e-12	6.35314e-11		ILDR1	3q13.33	-0.239461	1.23664e-11	1.26994e-10
	CR1	1q32.2	0.243119	5.87771e-12	6.44986e-11		BEX1	Xq22.1	-0.239353	1.26381e-11	1.29651e-10
	CENPA	2p23.3	0.243118	5.87852e-12	6.44986e-11		ETFBKMT	12p11.21	-0.239349	1.26477e-11	1.29682e-10
	ATP13A4	3q29	0.243116	5.88137e-12	6.44986e-11		ZNF224	19q13.31	-0.239175	1.30998e-11	1.3418e-10
	SERPINE2	2q36.1	0.242984	6.04236e-12	6.60831e-11		ZNF30	19q13.13	-0.239154	1.31536e-11	1.34594e-10
	CXCL10	4q21.1	0.242955	6.07838e-12	6.64408e-11		FSTL4	5q31.1	-0.239109	1.32754e-11	1.35771e-10
	CYB561A3	11q12.2	0.242893	6.15673e-12	6.72238e-11		POLR3E	16p12.2	-0.238847	1.39923e-11	1.42304e-10
	PRICKLE1	12q12	0.242777	6.30404e-12	6.87573e-11		HTR7P1	12p13.1	-0.238787	1.41636e-11	1.43811e-10
	GIPC1	19p13.12	0.242763	6.32199e-12	6.89156e-11		ANKRD30B	18p11.21	-0.238671	1.4495e-11	1.47043e-10
	LINC01550	14q32.2	0.242713	6.38746e-12	6.95535e-11		MFAP3	5q33.2	-0.238591	1.47313e-11	1.49364e-10
	FAM20C	7p22.3	0.242521	6.64348e-12	7.21843e-11		SLC19A2	1q24.2	-0.238555	1.48388e-11	1.50378e-10
	G6PD	Xq28	0.242391	6.82274e-12	7.40687e-11		RP1	8q11.23-q12.1	-0.23836	1.54309e-11	1.56063e-10
	PTGER4	5p13.1	0.242384	6.83225e-12	7.41147e-11		DRAIC	15q23	-0.238302	1.56105e-11	1.57799e-10
	C1S	12p13.31	0.242372	6.84799e-12	7.42453e-11		MAN2B2	4p16.1	-0.238296	1.56292e-11	1.57908e-10
	TBPL1	6q23.2	0.24236	6.8662e-12	7.43622e-11		LARP4	12q13.12	-0.238293	1.5639e-11	1.57928e-10
	PUS3	11q24.2	0.242317	6.92654e-12	7.48537e-11		ARL17A	17q21.31	-0.2381	1.62558e-11	1.63909e-10
	CHIC2	4q12	0.242279	6.98026e-12	7.5353e-11		MINPP1	10q23.2	-0.23806	1.63875e-11	1.65153e-10
	MAML2	11q21	0.242271	6.99121e-12	7.54305e-11		ZBTB26	9q33.2	-0.238041	1.64496e-11	1.65696e-10
	CARD6	5p13.1	0.242266	6.99894e-12	7.54732e-11		SCN1B	19q13.11	-0.23803	1.64866e-11	1.65985e-10
	ASB2	14q32.12	0.242254	7.01524e-12	7.55676e-11		KIAA1107	1p22.1	-0.23801	1.65525e-11	1.66564e-10
	GNLY	2p11.2	0.242237	7.03973e-12	7.57906e-11		PTPRN2	7q36.3	-0.238005	1.65684e-11	1.66641e-10
	PGK1	Xq21.1	0.242215	7.07239e-12	7.61013e-11		PER3	1p36.23	-0.237967	1.66953e-11	1.67748e-10
	ALG3	3q27.1	0.242133	7.19177e-12	7.72613e-11		NPAS1	19q13.32	-0.237845	1.71094e-11	1.71824e-10
	LILRB3	19q13.42	0.2421	7.2404e-12	7.77421e-11		KATNIP	16p12.1	-0.237713	1.75665e-11	1.75708e-10
	MAN2B1	19p13.13	0.242062	7.29629e-12	7.83002e-11		ZNF772	19q13.43	-0.237707	1.75878e-11	1.75834e-10
	GTDC1	2q22.3	0.242028	7.34745e-12	7.8807e-11		SLC30A5	5q13.1-q13.2	-0.237629	1.78636e-11	1.78325e-10
	MTFR2	6q23.3	0.242016	7.36473e-12	7.89501e-11		SCCPDH	1q44	-0.237493	1.8357e-11	1.82885e-10
	PPP1R1A	12q13.2	0.241998	7.39183e-12	7.91982e-11		BTBD9	6p21.2	-0.237415	1.86438e-11	1.85389e-10
	KPNA7	7q22.1	0.24192	7.50984e-12	8.03766e-11		ZNF20	19p13.2	-0.237342	1.89183e-11	1.88009e-10
	TBC1D7	6p24.1	0.241865	7.59527e-12	8.11175e-11		NAPG	18p11.22	-0.237291	1.9112e-11	1.89746e-10
	ZW10	11q23.2	0.241855	7.61041e-12	8.12359e-11		PIP4K2B	17q12	-0.237186	1.95179e-11	1.93297e-10
	UCP2	11q13.4	0.241772	7.74104e-12	8.25634e-11		AGGF1	5q13.3	-0.237162	1.96109e-11	1.94026e-10
	TEX11	Xp11	0.24177	7.74302e-12	8.25634e-11		ZNF43	19p12	-0.237127	1.97497e-11	1.95302e-10
	SLC35C2	20q13.12	0.241726	7.81333e-12	8.32688e-11		FAM81B	5q15	-0.237091	1.989e-11	1.96593e-10
	AMER1	Xq11.2	0.241651	7.93299e-12	8.4499e-11		VWA3A	16p12.2	-0.236946	2.04748e-11	2.02273e-10
	TIGIT	3q13.31	0.241644	7.94519e-12	8.45839e-11		BDNF-AS	11p14.1	-0.23693	2.05401e-11	2.02818e-10
	PRF1	10q22.1	0.241504	8.17487e-12	8.67064e-11		SRFBP1	5q23.1	-0.236902	2.0652e-11	2.03823e-10
	PLEKHN1	1p36.33	0.241494	8.19065e-12	8.68279e-11		CETN3	5q14.3	-0.236829	2.0957e-11	2.06528e-10
	RAB29	1q32.1	0.241391	8.365e-12	8.86291e-11		MFAP1	15q15.3	-0.23681	2.10352e-11	2.07196e-10
	SLC16A13	17p13.1	0.241303	8.51654e-12	9.01394e-11		CADM2	3p12.1	-0.236764	2.12303e-11	2.09015e-10
	PSMA2	7p14.1	0.240988	9.07881e-12	9.5989e-11		GRAMD1A	19q13.11	-0.236625	2.18274e-11	2.14683e-10
	DNAJB11	3q27.3	0.240984	9.08562e-12	9.60103e-11		CCDC39	3q26.33	-0.236504	2.23576e-11	2.1979e-10
	TNFSF9	19p13.3	0.240886	9.2694e-12	9.78491e-11		TMEM82	1p36.21	-0.236473	2.2498e-11	2.21061e-10
	TBC1D31	8q24.13	0.240854	9.32864e-12	9.84226e-11		ZNF37A	10p11.1	-0.236436	2.26624e-11	2.22458e-10
	P3H1	1p34.2	0.24084	9.35549e-12	9.86539e-11		GHDC	17q21.2	-0.236406	2.27985e-11	2.23684e-10
	TMEM165	4q12	0.240649	9.72528e-12	1.02338e-10		HOOK1	1p32.1	-0.236338	2.31091e-11	2.26399e-10
	TREM1	6p21.1	0.240594	9.83423e-12	1.03376e-10		WWP1	8q21.3	-0.236319	2.31933e-11	2.27113e-10
	CYREN	7q33	0.240579	9.86353e-12	1.03629e-10		TENT2	5q14.1	-0.236309	2.32398e-11	2.27457e-10
	PPIB	15q22.31	0.240527	9.96756e-12	1.04667e-10		DCAKD	17q21.31	-0.236215	2.36818e-11	2.3167e-10
	ACSL5	10q25.2	0.240458	1.01097e-11	1.06104e-10		ANKRD20A9P	13q11	-0.236098	2.42355e-11	2.36624e-10
	CYP8B1	3p22.1	0.240272	1.04973e-11	1.09862e-10		PHAX	5q23.2	-0.236002	2.47056e-11	2.40706e-10
	ATF3	1q32.3	0.24027	1.05006e-11	1.09862e-10		SKAP1	17q21.32	-0.235967	2.48733e-11	2.42143e-10
	TMEM258	11q12.2	0.240254	1.05353e-11	1.1011e-10		FAM214A	15q21.2-q21.3	-0.235914	2.51389e-11	2.44491e-10
	RPF2	6q21	0.2402	1.06501e-11	1.11235e-10		WDR93	15q26.1	-0.235901	2.52027e-11	2.44993e-10
	NPM2	8p21.3	0.240158	1.07416e-11	1.1209e-10		IFT140	16p13.3	-0.235854	2.54386e-11	2.47045e-10
	IGFLR1	19q13.12	0.240142	1.07766e-11	1.12397e-10		IL20	1q32.1	-0.235819	2.56141e-11	2.48509e-10
	SLAMF8	1q23.2	0.240127	1.08089e-11	1.12675e-10		AGXT2	5p13.2	-0.235753	2.59548e-11	2.51692e-10
	ARHGAP30	1q23.3	0.240039	1.10027e-11	1.14516e-10		GLUD1	10q23.2	-0.235737	2.60381e-11	2.52378e-10
	DEUP1	11q21	0.239965	1.11684e-11	1.1612e-10		ZNF875	19q13.12	-0.235688	2.62913e-11	2.54709e-10
	CAMKV	3p21.31	0.239917	1.12774e-11	1.17193e-10		ZNF227	19q13.31	-0.23555	2.7017e-11	2.6136e-10
	RNF217-AS1	6q22.31	0.239902	1.13132e-11	1.17442e-10		ZNF664	12q24.31	-0.235492	2.73292e-11	2.64125e-10
	KLK5	19q13.41	0.239877	1.13684e-11	1.17894e-10		FBXO15	18q22.3	-0.23548	2.73958e-11	2.64589e-10
	IFNAR2	21q22.11	0.23987	1.13854e-11	1.18008e-10		C5	9q33.2	-0.235479	2.74036e-11	2.64589e-10
	GRB10	7p12.1	0.239867	1.13917e-11	1.18012e-10		PDZK1	1q21.1	-0.235293	2.84287e-11	2.7409e-10
	AGXT	2q37.3	0.239833	1.1471e-11	1.18773e-10		C5ORF64	5q12.1	-0.23523	2.8788e-11	2.77421e-10
	BAMBI	10p12.1	0.239798	1.15529e-11	1.19559e-10		TDRD7	9q22.33	-0.235214	2.88763e-11	2.78137e-10
	HCCS	Xp22.2	0.239723	1.17297e-11	1.21326e-10		DHPS	19p13.13	-0.235202	2.89437e-11	2.78652e-10
	MEI1	22q13.2	0.239719	1.17377e-11	1.21346e-10		SLC1A4	2p14	-0.235082	2.96413e-11	2.84727e-10
	HMGB3	Xq28	0.239596	1.20342e-11	1.24091e-10		ATRIP	3p21.31	-0.235081	2.96457e-11	2.84727e-10
	SPHK1	17q25.1	0.23957	1.20969e-11	1.24673e-10		KICS2	12q14.2	-0.235059	2.9776e-11	2.85841e-10
	FGFR4	5q35.2	0.239555	1.21335e-11	1.24898e-10		ZNF322	6p22.2	-0.234997	3.01422e-11	2.88827e-10
	PPIC	5q23.2	0.239522	1.22136e-11	1.25617e-10		ZC3H13	13q14.13	-0.234991	3.01801e-11	2.89027e-10
	TMEM45A	3q12.2	0.2395	1.22679e-11	1.26111e-10		PGLYRP2	19p13.12	-0.23498	3.02437e-11	2.89498e-10
	FXYD5	19q13.12	0.239383	1.25608e-11	1.28924e-10		MLH1	3p22.2	-0.234912	3.06549e-11	2.93294e-10
	EFS	14q11.2	0.239316	1.27322e-11	1.30483e-10		ZNF638	2p13.3-p13.2	-0.234898	3.07378e-11	2.93666e-10
	MEGF6	1p36.32	0.239156	1.31479e-11	1.34594e-10		CHD6	20q12	-0.234808	3.1288e-11	2.9878e-10
	APOD	3q29	0.239099	1.32995e-11	1.35948e-10		LASP1	17q12	-0.234758	3.16023e-11	3.01494e-10
	ARPC2	2q35	0.239053	1.34235e-11	1.37146e-10		PLEKHD1	14q24.1	-0.234749	3.16548e-11	3.01851e-10
	KLK14	19q13.41	0.239045	1.3446e-11	1.37306e-10		ALKBH8	11q22.3	-0.234742	3.16994e-11	3.02132e-10
	ABCC2	10q24.2	0.239013	1.35332e-11	1.38125e-10		CREBRF	5q35.1	-0.234722	3.18282e-11	3.03216e-10
	AOPEP	9q22.32	0.23898	1.3623e-11	1.38971e-10		HEATR6	17q23.1	-0.234666	3.21813e-11	3.06402e-10
	QPRT	16p11.2	0.23895	1.37045e-11	1.39731e-10		ADAL	15q15.3	-0.234664	3.21933e-11	3.06402e-10
	RPUSD3	3p25.3	0.238898	1.38492e-11	1.41135e-10		KLC2	11q13.2	-0.234575	3.27621e-11	3.11668e-10
	ADCK5	8q24.3	0.238892	1.38653e-11	1.41228e-10		ELF1	13q14.11	-0.234558	3.28718e-11	3.12563e-10
	FBXO10	9p13.2	0.238887	1.38818e-11	1.41323e-10		ZMYM2	13q12.11	-0.234369	3.41186e-11	3.2411e-10
	ABCD1	Xq28	0.238859	1.39597e-11	1.42044e-10		ERBIN	5q12.3	-0.234344	3.42863e-11	3.25549e-10
	ENTHD1	22q13.1	0.238825	1.40554e-11	1.42873e-10		SUGP2	19p13	-0.234319	3.44587e-11	3.26877e-10
	MYLK3	16q11.2	0.238796	1.4136e-11	1.43619e-10		ZNF37BP	10q11.21	-0.234279	3.47299e-11	3.29293e-10
	BHLHE22	8q12.3	0.238785	1.41693e-11	1.43811e-10		SMAD3	15q22.33	-0.234187	3.53619e-11	3.34652e-10
	CBR1	21q22.12	0.238476	1.50741e-11	1.52588e-10		FBP1	9q22.32	-0.234115	3.58673e-11	3.39114e-10
	EAF2	3q13.33	0.238475	1.50778e-11	1.52588e-10		SPRYD3	12q13.13	-0.234019	3.65532e-11	3.4511e-10
	PCSK9	1p32.3	0.238475	1.50797e-11	1.52588e-10		SMAD5	5q31.1	-0.233958	3.69911e-11	3.48751e-10
	ARF5	7q32.1	0.238211	1.58995e-11	1.60478e-10		C1ORF226	1q23.3	-0.23358	3.98499e-11	3.74118e-10
	PREB	2p23.3	0.238109	1.62267e-11	1.63697e-10		AHCYL2	7q32.1	-0.23357	3.99235e-11	3.74633e-10
	DERL1	8q24.13	0.237984	1.66381e-11	1.67258e-10		HNRNPH2	Xq22.1	-0.233564	3.99747e-11	3.74939e-10
	SLC22A3	6q25.3	0.237838	1.71309e-11	1.71953e-10		CMBL	5p15.2	-0.233552	4.00639e-11	3.75552e-10
	FAM207A	21q22.3	0.237804	1.72498e-11	1.7306e-10		GFM2	5q13.3	-0.233499	4.04857e-11	3.78844e-10
	ARPC5L	9q33.3	0.23778	1.73306e-11	1.73783e-10		TMBIM4	12q14.3	-0.23348	4.0637e-11	3.80082e-10
	MMP3	11q22.2	0.237775	1.73499e-11	1.7389e-10		ZMYND10	3p21.31	-0.233419	4.11243e-11	3.84102e-10
	S100A3	1q21.3	0.237762	1.73963e-11	1.74268e-10		ANKRD24	19p13.3	-0.233321	4.19238e-11	3.91022e-10
	LAG3	12p13.31	0.237752	1.74292e-11	1.74509e-10		CACNB2	10p12	-0.233297	4.21192e-11	3.92566e-10
	ADGRE5	19p13.12	0.237725	1.75233e-11	1.75364e-10		PCNX4	14q23.1	-0.233296	4.21285e-11	3.92566e-10
	RGS10	10q26.11	0.237669	1.77213e-11	1.7708e-10		CNTD1	17q21.2-q21.31	-0.233269	4.23568e-11	3.94509e-10
	FBXO24	7q22.1	0.237656	1.77692e-11	1.77471e-10		GEMIN5	5q33.2	-0.233237	4.26238e-11	3.96443e-10
	MAP4K1	19q13.2	0.23762	1.78952e-11	1.78551e-10		DNAI7	12p12.1	-0.233156	4.33039e-11	4.02395e-10
	ANLN	7p14.2	0.237588	1.80113e-11	1.79619e-10		DNAJC18	5q31.2	-0.232638	4.79226e-11	4.42439e-10
	SOX6	11p15.2	0.237557	1.81218e-11	1.80632e-10		UEVLD	11p15.1	-0.232491	4.93196e-11	4.54882e-10
	MRPL47	3q26.33	0.237451	1.851e-11	1.84318e-10		NAV3	12q21.2	-0.232489	4.93385e-11	4.54882e-10
	ZIC1	3q24	0.237441	1.85483e-11	1.84607e-10		GLUL	1q25.3	-0.232443	4.97857e-11	4.58583e-10
	C2CD2	21q22.3	0.237415	1.86453e-11	1.85389e-10		APIP	11p13	-0.232396	5.02462e-11	4.62399e-10
	TBX10	11q13.2	0.237336	1.89413e-11	1.88144e-10		BRD3OS	9q34.2	-0.23239	5.02971e-11	4.62654e-10
	VLDLR-AS1	9p24.2	0.23725	1.92707e-11	1.91227e-10		CFAP43	10q25.1	-0.232345	5.07431e-11	4.66543e-10
	SMOX	20p13	0.237247	1.92813e-11	1.91237e-10		CHMP5	9p13.3	-0.2323	5.11919e-11	4.70022e-10
	SLC45A4	8q24.3	0.237199	1.94643e-11	1.92957e-10		TSTD2	9q22.33	-0.232269	5.15031e-11	4.72458e-10
	NUDT5	10p14	0.237193	1.94911e-11	1.93126e-10		CBLN3	14q12	-0.232269	5.15044e-11	4.72458e-10
	MED6	14q24.2	0.237176	1.95563e-11	1.93582e-10		CSNK1G1	15q22.31	-0.232249	5.17023e-11	4.74057e-10
	NR2E1	6q21	0.236888	2.07131e-11	2.04325e-10		ETAA1	2p14	-0.232222	5.19723e-11	4.76314e-10
	CLDN2	Xq22.3	0.236842	2.09044e-11	2.06111e-10		GRAMD1C	3q13.31	-0.232203	5.21741e-11	4.77944e-10
	CLEC2B	12p13.31	0.236632	2.17948e-11	2.14467e-10		ADCY1	7p12.3	-0.232031	5.39494e-11	4.93304e-10
	LILRA3	19q13.4 alternate reference locus	0.236456	2.25715e-11	2.21675e-10		IKBKB	8p11.21	-0.231949	5.48195e-11	5.00804e-10
	OLIG2	21q22.11	0.236396	2.2844e-11	2.24021e-10		PEX19	1q23.2	-0.23192	5.51258e-11	5.03372e-10
	RIMS3	1p34.2	0.236379	2.29216e-11	2.24672e-10		TSPOAP1	17q22	-0.23191	5.52405e-11	5.04189e-10
	SNTB1	8q24.12	0.236195	2.37764e-11	2.32481e-10		ZNF226	19q13.31	-0.231907	5.52708e-11	5.04236e-10
	ADTRP	6p24.1	0.236159	2.3945e-11	2.34015e-10		TSPAN1	1p34.1	-0.231828	5.6122e-11	5.1107e-10
	RCN3	19q13.33	0.236151	2.39838e-11	2.34281e-10		PKIB	6q22.31	-0.231731	5.71995e-11	5.20409e-10
	PLEKHG1	6q25.1	0.236057	2.44327e-11	2.3832e-10		INPP4B	4q31.21	-0.231707	5.74668e-11	5.22366e-10
	TMEM150B	19q13.42	0.236057	2.4433e-11	2.3832e-10		TAF9	5q13.2	-0.231609	5.85737e-11	5.32186e-10
	NEK6	9q33.3	0.236014	2.4643e-11	2.40251e-10		ZNF763	19p13.2	-0.231556	5.91806e-11	5.3697e-10
	AGPAT4	6q26	0.236	2.47137e-11	2.40706e-10		SCAPER	15q24.3	-0.231501	5.98126e-11	5.42212e-10
	ZBTB32	19q13.12	0.235958	2.49209e-11	2.42489e-10		NAIP	5q13.2	-0.231491	5.99286e-11	5.42772e-10
	RNF26	11q23.3	0.235875	2.53354e-11	2.46163e-10		MYOF	10q23.33	-0.231472	6.0151e-11	5.44349e-10
	SNX8	7p22.3	0.235822	2.56011e-11	2.48503e-10		ACVR2B	3p22.2	-0.231472	6.0157e-11	5.44349e-10
	WWTR1	3q25.1	0.235676	2.63547e-11	2.55199e-10		DYRK1B	19q13.2	-0.23144	6.05284e-11	5.46969e-10
	INGX	Xq13.1	0.235651	2.64839e-11	2.56327e-10		DCP1B	12p13.33	-0.231393	6.10803e-11	5.51706e-10
	BIN2	12q13.13	0.235523	2.71643e-11	2.62658e-10		PRR12	19q13.33	-0.231136	6.42035e-11	5.77642e-10
	TCF3	19p13.3	0.235361	2.80478e-11	2.70678e-10		FAM135B	8q24.23	-0.230951	6.65523e-11	5.97628e-10
	KLK11	19q13.41	0.235308	2.83431e-11	2.73397e-10		ZFYVE16	5q14.1	-0.230938	6.6718e-11	5.98579e-10
	DNAH11	7p15.3	0.235182	2.90617e-11	2.79654e-10		FAM114A2	5q33.2	-0.230859	6.77497e-11	6.07019e-10
	LINC00634	22q13.2	0.235157	2.92028e-11	2.80877e-10		TBC1D15	12q21.1	-0.230762	6.90326e-11	6.17409e-10
	TUBB6	18p11.21	0.235106	2.95011e-11	2.8361e-10		STX18	4p16.3-p16.2	-0.230515	7.24206e-11	6.45692e-10
	EMC8	16q24.1	0.235002	3.01157e-11	2.88827e-10		RARA	17q21.2	-0.230382	7.43052e-11	6.61317e-10
	ZDHHC14	6q25.3	0.234998	3.01385e-11	2.88827e-10		C17ORF58	17q24.2	-0.230293	7.56069e-11	6.72005e-10
	UQCRH	1p33	0.234997	3.01447e-11	2.88827e-10		INSR	19p13.2	-0.230208	7.68462e-11	6.82112e-10
	TOX	8q12.1	0.234908	3.06808e-11	2.93402e-10		MTMR9	8p23.1	-0.230187	7.71706e-11	6.84385e-10
	CCNJL	5q33.3	0.234903	3.07058e-11	2.935e-10		GREB1L	18q11.1-q11.2	-0.23013	7.8019e-11	6.91296e-10
	FAM83D	20q11.23	0.234793	3.13835e-11	2.99549e-10		EXD2	14q24.1	-0.230062	7.90525e-11	7.00144e-10
	KCTD5	16p13.3	0.234402	3.39006e-11	3.22192e-10		IPO7	11p15.4	-0.229973	8.04236e-11	7.11659e-10
	RRP7A	22q13.2	0.234321	3.44446e-11	3.26877e-10		SOX2-OT	3q26.33	-0.229943	8.08915e-11	7.15166e-10
	ESR2	14q23.2-q23.3	0.23426	3.48635e-11	3.30403e-10		MED13	17q23.2	-0.229808	8.30299e-11	7.33101e-10
	LPO	17q22	0.234257	3.48831e-11	3.30432e-10		TMEM30B	14q23.1	-0.229673	8.5221e-11	7.51123e-10
	RENBP	Xq28	0.234242	3.49854e-11	3.31244e-10		BRSK1	19q13.42	-0.229632	8.58835e-11	7.56629e-10
	RNF145	5q33.3	0.234129	3.57679e-11	3.38334e-10		PPM1J	1p13.2	-0.229542	8.73925e-11	7.69584e-10
	DHCR7	11q13.4	0.234047	3.63537e-11	3.43551e-10		HEPACAM2	7q21.2	-0.229522	8.77377e-11	7.72284e-10
	TMBIM1	2q35	0.234037	3.64224e-11	3.44037e-10		JHY	11q24.1	-0.229434	8.92246e-11	7.83994e-10
	IGF2BP2	3q27.2	0.234005	3.66563e-11	3.4592e-10		CAPN8	1q41	-0.229414	8.95737e-11	7.86027e-10
	WARS1	14q32.2	0.233964	3.69517e-11	3.48543e-10		CEP97	3q12.3	-0.229408	8.96849e-11	7.86658e-10
	SLC1A3	5p13.2	0.233926	3.72295e-11	3.50833e-10		CHAD	17q21.33	-0.229341	9.08375e-11	7.95722e-10
	SF3B6	2p23.3	0.233917	3.72958e-11	3.51292e-10		FAM66C	12p13.31	-0.229252	9.24073e-11	8.08766e-10
	TMEM216	11q13.1	0.233831	3.79279e-11	3.57078e-10		AP4E1	15q21.2	-0.229244	9.25491e-11	8.09299e-10
	IL2RG	Xq13.1	0.233794	3.82038e-11	3.59507e-10		BPTF	17q24.2	-0.22911	9.4962e-11	8.28229e-10
	NCF2	1q25.3	0.233752	3.85265e-11	3.62373e-10		C8ORF48	8p22	-0.228979	9.73908e-11	8.47935e-10
	ACTL8	1p36.13	0.233749	3.85497e-11	3.62421e-10		KRT222	17q21.2	-0.228942	9.80891e-11	8.52952e-10
	SEC61G	7p11.2	0.233667	3.91723e-11	3.68102e-10		SPTAN1	9q34.11	-0.228826	1.0029e-10	8.71658e-10
	FUT9	6q16.1	0.233636	3.94106e-11	3.70168e-10		NXPE3	3q12.3	-0.228773	1.01319e-10	8.79843e-10
	CLLU1-AS1	12q22	0.233551	4.00777e-11	3.75552e-10		CSNK1A1	5q32	-0.22875	1.01765e-10	8.82947e-10
	PRKAA1	5p13.1	0.233542	4.01454e-11	3.76011e-10		TTC19	17p12	-0.228716	1.02442e-10	8.88049e-10
	FASTK	7q36.1	0.233529	4.0249e-11	3.76805e-10		OLFM1	9q34.3	-0.228678	1.03195e-10	8.93805e-10
	MAGOH	1p32.3	0.233459	4.08079e-11	3.81502e-10		TTC37	5q15	-0.228567	1.05403e-10	9.11751e-10
	PTPRCAP	11q13.2	0.23343	4.10386e-11	3.8348e-10		KIAA1191	5q35.2	-0.228474	1.07314e-10	9.26679e-10
	GBP6	1p22.2	0.233386	4.13938e-11	3.86438e-10		FUT1	19q13.33	-0.228393	1.08992e-10	9.40354e-10
	OXCT2	1p34.2	0.233376	4.14744e-11	3.8701e-10		BCAS1	20q13.2	-0.228374	1.09375e-10	9.43251e-10
	PTPN22	1p13.2	0.233259	4.24384e-11	3.95013e-10		RASA4CP	7p13	-0.228208	1.12923e-10	9.72174e-10
	PILRA	7q22.1	0.233257	4.24504e-11	3.95013e-10		CHRD	3q27.1	-0.228153	1.14121e-10	9.8207e-10
	SLC15A3	11q12.2	0.233189	4.30223e-11	3.99963e-10		TNRC6A	16p12.1	-0.228087	1.15574e-10	9.93717e-10
	GPAA1	8q24.3	0.233077	4.39815e-11	4.08501e-10		ROBO2	3p12.3	-0.228077	1.15787e-10	9.95126e-10
	ZP1	11q12.2	0.233063	4.41009e-11	4.09421e-10		MED12L	3q25.1	-0.228048	1.16419e-10	1.00013e-09
	GBP5	1p22.2	0.233039	4.43021e-11	4.11098e-10		NUDT6	4q28.1	-0.227956	1.18503e-10	1.01716e-09
	LINC00239	14q32.31	0.233012	4.45394e-11	4.13109e-10		PFKM	12q13.11	-0.227893	1.1994e-10	1.02817e-09
	HIKESHI	11q14.2	0.233	4.4644e-11	4.13887e-10		CANT1	17q25.3	-0.227876	1.20331e-10	1.03108e-09
	SLC2A14	12p13.31	0.232887	4.56406e-11	4.22931e-10		THRAP3	1p34.3	-0.227857	1.20768e-10	1.03438e-09
	CLDN9	16p13.3	0.23286	4.58883e-11	4.25011e-10		ANKMY1	2q37.3	-0.227846	1.21014e-10	1.03604e-09
	DESI2	1q44	0.232858	4.59075e-11	4.25011e-10		C2ORF73	2p16.2	-0.227783	1.22492e-10	1.0469e-09
	SPAAR	9p13.3	0.232854	4.59376e-11	4.25093e-10		ALOXE3	17p13.1	-0.227747	1.23327e-10	1.05352e-09
	WNT3A	1q42.13	0.232815	4.62955e-11	4.28207e-10		ZNF33B	10q11.21	-0.227745	1.23371e-10	1.05352e-09
	DYSF	2p13.2	0.232781	4.65973e-11	4.308e-10		PHF21B	22q13.31	-0.22774	1.23487e-10	1.05406e-09
	FETUB	3q27.3	0.23273	4.70642e-11	4.34915e-10		RBM27	5q32	-0.227727	1.23806e-10	1.05634e-09
	TRIM69	15q15-q21	0.232649	4.78175e-11	4.41672e-10		TFCP2	12q13.12-q13.13	-0.227689	1.24692e-10	1.06344e-09
	RNASE1	14q11.2	0.232505	4.91833e-11	4.53869e-10		ODAD2	10p12.1	-0.227667	1.25228e-10	1.0671e-09
	PALS2	7p15.3	0.232446	4.97572e-11	4.58531e-10		DHX30	3p21.31	-0.227587	1.27154e-10	1.08259e-09
	IGFBP3	7p12.3	0.232398	5.02258e-11	4.62399e-10		MCC	5q22.2	-0.227583	1.27244e-10	1.0829e-09
	KIAA1755	20q11.23	0.232335	5.08416e-11	4.67234e-10		LRRC73	6p21.1	-0.227486	1.29631e-10	1.10228e-09
	JMJD4	1q42.13	0.232317	5.10258e-11	4.68711e-10		MPPE1	18p11.21	-0.227477	1.29842e-10	1.1036e-09
	NUDCD1	8q23.1	0.232183	5.23714e-11	4.79533e-10		KCNH1	1q32.2	-0.227457	1.30356e-10	1.10656e-09
	CDC123	10p14-p13	0.232151	5.26999e-11	4.8232e-10		KCNE4	2q36.1	-0.22738	1.32284e-10	1.12103e-09
	PRKX	Xp22.33	0.232044	5.38109e-11	4.92263e-10		TSNAX	1q42.2	-0.227297	1.34391e-10	1.13792e-09
	SDHD	11q23.1	0.232015	5.41191e-11	4.9463e-10		LMNTD2	11p15.5	-0.227096	1.39638e-10	1.18134e-09
	GJB6	13q12.11	0.231904	5.53016e-11	5.04287e-10		RETREG2	2q35	-0.227092	1.39742e-10	1.18173e-09
	ATP1B3	3q23	0.231863	5.57408e-11	5.08061e-10		MEIS3P1	17p12	-0.226981	1.42715e-10	1.20585e-09
	PUF60	8q24.3	0.231841	5.59842e-11	5.10047e-10		PVALB	22q12.3	-0.226738	1.49493e-10	1.26153e-09
	CYP27C1	2q14.3	0.231805	5.63725e-11	5.13118e-10		CCP110	16p12.3	-0.226598	1.53506e-10	1.29484e-09
	PNMA6A	Xq28	0.231709	5.74381e-11	5.22343e-10		TRAPPC11	4q35.1	-0.22659	1.53744e-10	1.29576e-09
	NRG2	5q31.2	0.231595	5.87294e-11	5.33359e-10		RNF20	9q31.1	-0.226532	1.5545e-10	1.30958e-09
	FNDC3B	3q26.31	0.231563	5.90909e-11	5.36399e-10		POLN	4p16.3	-0.226367	1.60398e-10	1.3507e-09
	U2AF1	21q22.3	0.231552	5.92278e-11	5.37155e-10		SFI1	22q12.2	-0.226356	1.60741e-10	1.35302e-09
	GGTLC2	22q11.22	0.231495	5.98787e-11	5.42566e-10		FBXW11	5q35.1	-0.226332	1.61462e-10	1.35795e-09
	PLEKHA8	7p14.3	0.231454	6.03632e-11	5.45968e-10		SPAG17	1p12	-0.226324	1.61704e-10	1.35942e-09
	TMEM214	2p23.3	0.231445	6.04664e-11	5.46654e-10		RAD51D	17q12	-0.226251	1.63963e-10	1.37667e-09
	VNN3	6q23.2	0.231377	6.12707e-11	5.53176e-10		KIF13A	6p22.3	-0.226242	1.64266e-10	1.37864e-09
	CXCR5	11q23.3	0.231363	6.14337e-11	5.54399e-10		CACNA1D	3p21.1	-0.22623	1.6461e-10	1.38037e-09
	FNBP1	9q34.11	0.231359	6.149e-11	5.54656e-10		ERI2	16p12.3	-0.226153	1.67036e-10	1.39954e-09
	SHMT2	12q13.3	0.231263	6.26391e-11	5.64767e-10		SGCB	4q12	-0.2261	1.68744e-10	1.41326e-09
	SIRPB1	20p13	0.231208	6.33182e-11	5.70441e-10		AIG1	6q24.2	-0.226091	1.69009e-10	1.41488e-09
	CFL1	11q13.1	0.231207	6.33254e-11	5.70441e-10		TMX3	18q22.1	-0.226056	1.70134e-10	1.42283e-09
	RNF166	16q24.2-q24.3	0.231143	6.41271e-11	5.77403e-10		FECH	18q21.31	-0.225944	1.73802e-10	1.45077e-09
	ODC1	2p25.1	0.231136	6.42113e-11	5.77642e-10		CHST15	10q26.13	-0.225927	1.74356e-10	1.45478e-09
	EMP1	12p13.1	0.23107	6.50398e-11	5.84832e-10		TPBG	6q14.1	-0.225907	1.75034e-10	1.45983e-09
	BBOX1	11p14.2	0.231054	6.524e-11	5.86369e-10		TRIM37	17q22	-0.22587	1.76257e-10	1.46942e-09
	GDPD5	11q13.4-q13.5	0.230986	6.61076e-11	5.93901e-10		RALGPS2	1q25.2	-0.225608	1.85198e-10	1.53947e-09
	TPTEP2	22q13.1	0.230947	6.66052e-11	5.97835e-10		SLF1	5q15	-0.225591	1.85812e-10	1.54393e-09
	GRIN2D	19q13.33	0.230909	6.71023e-11	6.01757e-10		EFCAB13	17q21.32	-0.22558	1.862e-10	1.54652e-09
	ANKS6	9q22.33	0.230879	6.74906e-11	6.04969e-10		NLRP5	19q13.43	-0.225541	1.87578e-10	1.55667e-09
	ESX1	Xq22.2	0.230827	6.81783e-11	6.10586e-10		MAU2	19p13.11	-0.225489	1.89432e-10	1.5714e-09
	BMP7	20q13.31	0.230803	6.84931e-11	6.13131e-10		BHLHB9	Xq22.1	-0.225434	1.91407e-10	1.58713e-09
	ACTR3C	7q36.1	0.230799	6.85475e-11	6.13344e-10		SH3RF1	4q32.3-q33	-0.225367	1.93844e-10	1.60594e-09
	NKG7	19q13.41	0.230754	6.91415e-11	6.18106e-10		CEP68	2p14	-0.225365	1.93916e-10	1.60594e-09
	BMS1P20	22q11.22	0.230722	6.95775e-11	6.21726e-10		CALCOCO2	17q21.32	-0.224918	2.10991e-10	1.73658e-09
	XPNPEP1	10q25.1	0.230698	6.99023e-11	6.24351e-10		GLYR1	16p13.3	-0.224909	2.11341e-10	1.73759e-09
	ID4	6p22.3	0.230647	7.05976e-11	6.30279e-10		CLUHP3	16p11.2	-0.224908	2.11374e-10	1.73759e-09
	KLK13	19q13.41	0.230595	7.13035e-11	6.36298e-10		SUSD3	9q22.31	-0.224854	2.13536e-10	1.75464e-09
	NECAP2	1p36.13	0.230585	7.14412e-11	6.37243e-10		PCDH20	13q21.2	-0.22482	2.14931e-10	1.76538e-09
	CTSH	15q25.1	0.230495	7.26976e-11	6.47873e-10		OGA	10q24.32	-0.224802	2.15674e-10	1.77075e-09
	NCF1	7q11.23	0.230454	7.32773e-11	6.52748e-10		TMEM192	4q32.3	-0.224748	2.17876e-10	1.78664e-09
	TP53BP2	1q41	0.230408	7.39338e-11	6.58303e-10		SECISBP2	9q22.2	-0.22465	2.21924e-10	1.8176e-09
	NCALD	8q22.3	0.230319	7.52204e-11	6.69164e-10		KLHDC2	14q21.3	-0.224593	2.24333e-10	1.83658e-09
	SEMA7A	15q24.1	0.230314	7.52968e-11	6.69546e-10		PTCD2	5q13.2	-0.22458	2.24844e-10	1.84001e-09
	IRF4	6p25.3	0.230255	7.61617e-11	6.76636e-10		TSPAN3	15q24.3	-0.224545	2.26357e-10	1.85088e-09
	RIOX2	3q11.2	0.230229	7.6548e-11	6.79766e-10		DDX46	5q31.1	-0.224489	2.28748e-10	1.86814e-09
	ISY1	3q21.3	0.230189	7.71397e-11	6.84385e-10		RNF141	11p15.3	-0.224427	2.31429e-10	1.88926e-09
	TNFRSF9	1p36.23	0.230181	7.72505e-11	6.8479e-10		FAM172A	5q15	-0.224392	2.32948e-10	1.90011e-09
	LYPLA2	1p36.11	0.230055	7.91564e-11	7.00754e-10		TCEAL5	Xq22.1	-0.224348	2.34877e-10	1.91507e-09
	WNT2	7q31.2	0.229955	8.07036e-11	7.13821e-10		NAT1	8p22	-0.224117	2.4533e-10	1.99704e-09
	LSP1	11p15.5	0.229838	8.25518e-11	7.29524e-10		HIPK3	11p13	-0.224032	2.49291e-10	2.026e-09
	NUTF2	16q22.1	0.22983	8.26701e-11	7.30247e-10		ZNF500	16p13.3	-0.224027	2.49492e-10	2.0268e-09
	FGF11	17p13.1	0.229715	8.45303e-11	7.4602e-10		KLHL12	1q32.1	-0.224011	2.50259e-10	2.03221e-09
	SPOCK2	10q22.1	0.229699	8.47893e-11	7.47976e-10		ELF2	4q31.1	-0.223998	2.50868e-10	2.03634e-09
	LYZ	12q15	0.229683	8.50543e-11	7.49984e-10		CGN	1q21.3	-0.223961	2.52609e-10	2.04963e-09
	SIT1	9p13.3	0.229481	8.84196e-11	7.77704e-10		FHIP1B	11p15.4	-0.22386	2.57425e-10	2.08702e-09
	CD180	5q12.3	0.229481	8.8431e-11	7.77704e-10		SERPINB1	6p25.2	-0.223816	2.5957e-10	2.10356e-09
	AUNIP	1p36.11	0.229469	8.86328e-11	7.79136e-10		TRIM58	1q44	-0.223781	2.61315e-10	2.11684e-09
	LINC01547	21q22.3	0.229424	8.94073e-11	7.85255e-10		NECAB3	20q11.22	-0.223718	2.64403e-10	2.13926e-09
	MX2	21q22.3	0.229419	8.94853e-11	7.85596e-10		SMARCA2	9p24.3	-0.223615	2.69571e-10	2.17931e-09
	MLKL	16q23.1	0.229397	8.98637e-11	7.87881e-10		ELOVL5	6p12.1	-0.223411	2.80074e-10	2.25602e-09
	GUK1	1q42.13	0.229364	9.04326e-11	7.92522e-10		ATAD1	10q23.31	-0.223184	2.92199e-10	2.34708e-09
	FPR3	19q13.41	0.229338	9.08964e-11	7.9589e-10		BICDL1	12q24.23	-0.223168	2.93097e-10	2.35335e-09
	PDHA1	Xp22.12	0.22925	9.24525e-11	8.08808e-10		APC	5q22.2	-0.22308	2.97918e-10	2.39015e-09
	PSTPIP1	15q24.3	0.229221	9.29617e-11	8.12553e-10		PLEKHA7	11p15	-0.222854	3.10799e-10	2.4895e-09
	CPPED1	16p13.12	0.229211	9.31431e-11	8.13783e-10		MAGI2	7q21.11	-0.222802	3.13817e-10	2.51066e-09
	SLC35E4	22q12.2	0.229159	9.4087e-11	8.21672e-10		LIN7C	11p14.1	-0.222751	3.16846e-10	2.53287e-09
	HIF1A	14q23.2	0.229132	9.4574e-11	8.25564e-10		TTC30B	2q31.2	-0.222743	3.17284e-10	2.53536e-09
	KRT6A	12q13.13	0.229126	9.46851e-11	8.26174e-10		GLIPR1L2	12q21.2	-0.222741	3.17424e-10	2.53547e-09
	MYO9B	19p13.11	0.229076	9.55948e-11	8.33385e-10		TAF1L	9p21.1	-0.222689	3.20486e-10	2.55731e-09
	LIPC	15q21.3	0.229048	9.61179e-11	8.37581e-10		ZDHHC2	8p22	-0.222688	3.20542e-10	2.55731e-09
	ERP27	12p12.3	0.22902	9.66281e-11	8.4166e-10		JPX	Xq13.2	-0.222683	3.20857e-10	2.5586e-09
	MIR155HG	21q21.3	0.228959	9.77724e-11	8.50887e-10		RAI1	17p11.2	-0.222681	3.20959e-10	2.5586e-09
	TNFSF13B	13q33.3	0.228942	9.80948e-11	8.52952e-10		PCBP2	12q13.13	-0.222631	3.23963e-10	2.57844e-09
	HMBS	11q23.3	0.2288	1.00793e-10	8.75655e-10		PTP4A2	1p35.2	-0.222562	3.282e-10	2.61113e-09
	GADD45B	19p13.3	0.228767	1.0144e-10	8.80508e-10		ATPAF2	17p11.2	-0.222557	3.28511e-10	2.61257e-09
	TNFRSF4	1p36.33	0.228721	1.02348e-10	8.87625e-10		PAX2	10q24.31	-0.222529	3.3021e-10	2.62503e-09
	TAGAP	6q25.3	0.22871	1.02551e-10	8.88615e-10		AS3MT	10q24.32	-0.222463	3.34316e-10	2.65138e-09
	KCNC3	19q13.33	0.228608	1.0459e-10	9.055e-10		DHX8	17q21.31	-0.222289	3.45304e-10	2.73417e-09
	RP9	7p14.3	0.22859	1.04944e-10	9.08172e-10		PHF3	6q12	-0.222235	3.48832e-10	2.76101e-09
	LRRC28	15q26.3	0.228551	1.05731e-10	9.13845e-10		CELF1	11p11.2	-0.222226	3.49366e-10	2.76414e-09
	UQCRHL	1p36.21	0.228551	1.05737e-10	9.13845e-10		SAMD8	10q22.2	-0.222209	3.50474e-10	2.77182e-09
	PRKCQ	10p15.1	0.228519	1.0639e-10	9.19096e-10		FAM201A	9p13.1	-0.222195	3.51387e-10	2.77685e-09
	ICAM4	19p13.2	0.228412	1.08596e-10	9.3734e-10		RAB11FIP3	16p13.3	-0.222076	3.59272e-10	2.83468e-09
	ICAM1	19p13.2	0.228304	1.10859e-10	9.55644e-10		RSBN1L	7q11.23	-0.222062	3.6022e-10	2.83993e-09
	HRH1	3p25.3	0.228257	1.11856e-10	9.63822e-10		GTF2H2C	5q13.2	-0.222045	3.61375e-10	2.84791e-09
	CD68	17p13.1	0.228222	1.12622e-10	9.69999e-10		DDB2	11p11.2	-0.221945	3.68128e-10	2.89998e-09
	FGFBP1	4p15.32	0.228124	1.14758e-10	9.87128e-10		PARP11	12p13.32	-0.22192	3.69867e-10	2.91254e-09
	CXCR4	2q22.1	0.227961	1.18375e-10	1.0165e-09		ANKRD20A3P	9q21.11	-0.221855	3.74352e-10	2.94323e-09
	CSGALNACT1	8p21.3	0.227922	1.19265e-10	1.02326e-09		ZNF92	7q11.21	-0.221744	3.82158e-10	3.00224e-09
	GM2A	5q33.1	0.227918	1.19354e-10	1.02359e-09		FASTKD1	2q31.1	-0.221666	3.87724e-10	3.04477e-09
	FYN	6q21	0.227822	1.2157e-10	1.03997e-09		CCNG2	4q21.1	-0.221581	3.93886e-10	3.09074e-09
	MAGEA4	Xq28	0.227822	1.21577e-10	1.03997e-09		EIF4E3	3p13	-0.221446	4.03855e-10	3.16401e-09
	BPI	20q11.23	0.227802	1.22036e-10	1.04345e-09		OVGP1	1p13.2	-0.221401	4.07306e-10	3.18854e-09
	HES2	1p36.31	0.22767	1.25161e-10	1.06698e-09		SPATA46	1q23.3	-0.221262	4.17928e-10	3.26914e-09
	PFKFB2	1q32.1	0.227635	1.25996e-10	1.07319e-09		HIP1	7q11.23	-0.221226	4.20706e-10	3.2883e-09
	TNFAIP8	5q23.1	0.22754	1.28305e-10	1.09146e-09		C11ORF42	11p15.4	-0.221065	4.33425e-10	3.38507e-09
	LINC02693	17p11.2	0.227469	1.30041e-10	1.10483e-09		CDYL2	16q23.2	-0.221029	4.36366e-10	3.40406e-09
	CKS1B	1q21.3	0.227459	1.30294e-10	1.1065e-09		GTF2IP1	7q11.23	-0.221026	4.36601e-10	3.40457e-09
	EPSTI1	13q14.11	0.22744	1.30767e-10	1.10958e-09		PHF21A	11p11.2	-0.220901	4.46793e-10	3.47998e-09
	LOXL4	10q24.2	0.227431	1.31007e-10	1.11114e-09		ENTPD8	9q34.3	-0.220884	4.482e-10	3.48958e-09
	RTL8C	Xq26.3	0.227428	1.31062e-10	1.11114e-09		ASB7	15q26.3	-0.220871	4.49289e-10	3.4967e-09
	ST3GAL6	3q12.1	0.227371	1.32511e-10	1.12248e-09		AASS	7q31.32	-0.220805	4.54767e-10	3.53401e-09
	PIGA	Xp22.2	0.227142	1.38409e-10	1.17145e-09		PRLR	5p13.2	-0.22079	4.56019e-10	3.5422e-09
	TLE4	9q21.31	0.227021	1.41651e-10	1.19736e-09		IBTK	6q14.1	-0.220741	4.60205e-10	3.57015e-09
	CST7	20p11.21	0.226888	1.45269e-10	1.22691e-09		EIF4G3	1p36.12	-0.220739	4.60331e-10	3.57015e-09
	ABT1	6p22.2	0.226774	1.48468e-10	1.2534e-09		ZNF223	19q13.31	-0.220725	4.61602e-10	3.57862e-09
	EXOSC4	8q24.3	0.226595	1.53612e-10	1.29519e-09		ADCY6	12q13.12	-0.220671	4.66198e-10	3.61146e-09
	DMRTC2	19q13.2	0.226345	1.61076e-10	1.35527e-09		COG2	1q42.2	-0.220621	4.70509e-10	3.64203e-09
	IL15RA	10p15.1	0.226317	1.61914e-10	1.36061e-09		NISCH	3p21.1	-0.220557	4.76155e-10	3.68289e-09
	EMILIN3	20q12	0.22629	1.6277e-10	1.36722e-09		NLK	17q11.2	-0.220454	4.85252e-10	3.75035e-09
	TMCC3	12q22	0.226235	1.64464e-10	1.37972e-09		CDK20	9q22.1	-0.22034	4.95588e-10	3.82876e-09
	ARHGAP22	10q11.22-q11.23	0.226158	1.66892e-10	1.39892e-09		CEP126	11q22.1	-0.220258	5.03164e-10	3.88579e-09
	MINAR1	15q25.1	0.226073	1.69592e-10	1.41917e-09		AP3M1	10q22.2	-0.22025	5.03862e-10	3.88969e-09
	LSMEM1	7q31.1	0.226055	1.70171e-10	1.42283e-09		FAM222A-AS1	12q24.11	-0.22021	5.0756e-10	3.91521e-09
	CD8B	2p11.2	0.226018	1.71368e-10	1.43224e-09		LNX1	4q12	-0.220183	5.10155e-10	3.93372e-09
	PPP1CB	2p23.2	0.225978	1.72673e-10	1.44254e-09		HEATR5B	2p22.2	-0.220115	5.1655e-10	3.97996e-09
	LIX1L	1q21.1	0.225957	1.7338e-10	1.44784e-09		CYP4F22	19p13.12	-0.220093	5.1871e-10	3.99353e-09
	MPHOSPH10	2p13.3	0.225844	1.7712e-10	1.476e-09		REPS2	Xp22.2	-0.220009	5.2673e-10	4.05372e-09
	TMC6	17q25.3	0.225821	1.77879e-10	1.48171e-09		GRB2	17q25.1	-0.219988	5.28815e-10	4.06799e-09
	CARD16	11q22.3	0.225818	1.77989e-10	1.48201e-09		EGLN2	19q13.2	-0.219982	5.29365e-10	4.0693e-09
	ARHGAP27P2	17q24.2	0.225713	1.81574e-10	1.51123e-09		ZNF271P	18q12.2	-0.219928	5.3472e-10	4.10731e-09
	PNPLA3	22q13.31	0.225688	1.82445e-10	1.51785e-09		ERICH3	1p31.1	-0.219918	5.35677e-10	4.11309e-09
	PFKP	10p15.2	0.225611	1.85117e-10	1.53944e-09		EFCAB2	1q44	-0.219885	5.38901e-10	4.13467e-09
	LINC01003	7q36.1	0.225543	1.87518e-10	1.55667e-09		DUSP13	10q22.2	-0.219821	5.45269e-10	4.17873e-09
	MYORG	9p13.3	0.225381	1.9333e-10	1.60241e-09		CASZ1	1p36.22	-0.219706	5.56957e-10	4.26504e-09
	ADCY7	16q12.1	0.225275	1.97261e-10	1.63297e-09		GGA2	16p12.2	-0.219655	5.62232e-10	4.30214e-09
	CCT6A	7p11.2	0.225259	1.97835e-10	1.63704e-09		ZFC3H1	12q21.1	-0.219556	5.72522e-10	4.37419e-09
	GABBR2	9q22.33	0.225187	2.00542e-10	1.65876e-09		CD46	1q32.2	-0.219492	5.79281e-10	4.42245e-09
	FATE1	Xq28	0.225164	2.01406e-10	1.66522e-09		ZNF91	19p12	-0.21944	5.84869e-10	4.46342e-09
	CD19	16p11.2	0.225119	2.03151e-10	1.67895e-09		SIRT1	10q21.3	-0.219431	5.85894e-10	4.46954e-09
	SMIM10L2B	Xq26.3	0.22509	2.04251e-10	1.68735e-09		NUAK2	1q32.1	-0.219327	5.97201e-10	4.55232e-09
	SNORA8	11q21	0.225087	2.04356e-10	1.68752e-09		OR56B4	11p15.4	-0.219236	6.07195e-10	4.62297e-09
	ANP32B	9q22.33	0.225059	2.05459e-10	1.69578e-09		SACM1L	3p21.31	-0.219207	6.10466e-10	4.64414e-09
	RELT	11q13.4	0.225057	2.05526e-10	1.69578e-09		PHTF1	1p13.2	-0.219205	6.10638e-10	4.64414e-09
	FGFBP2	4p15.32	0.225041	2.06145e-10	1.70019e-09		ZFP2	5q35.3	-0.219154	6.16371e-10	4.68418e-09
	GNG5	1p22.3	0.225018	2.07049e-10	1.70694e-09		FBXL7	5p15.1	-0.219131	6.19014e-10	4.70085e-09
	ACAP1	17p13.1	0.225004	2.07585e-10	1.71065e-09		DMRTC1B	Xq13.1	-0.219115	6.20792e-10	4.71063e-09
	VSIG10L	19q13.41	0.224961	2.0929e-10	1.72399e-09		LARS1	5q32	-0.218981	6.36262e-10	4.81889e-09
	ERICH5	8q22.2	0.224952	2.09631e-10	1.72609e-09		EDEM1	3p26.1	-0.218844	6.52506e-10	4.93717e-09
	PRSS22	16p13.3	0.224916	2.11086e-10	1.73664e-09		ANKRD20A11P	21q11.2	-0.218841	6.52849e-10	4.93717e-09
	VNN1	6q23.2	0.224786	2.16299e-10	1.77516e-09		ZNF493	19p12	-0.218841	6.52866e-10	4.93717e-09
	CKLF	16q21	0.224783	2.16448e-10	1.77565e-09		TCEAL4	Xq22.2	-0.218828	6.54388e-10	4.94309e-09
	MFSD2A	1p34.2	0.224729	2.18623e-10	1.79203e-09		DNAH5	5p15.2	-0.218436	7.03095e-10	5.28509e-09
	L1CAM	Xq28	0.22467	2.21088e-10	1.81149e-09		PIGV	1p36.11	-0.218267	7.25082e-10	5.44219e-09
	SP140	2q37.1	0.22455	2.26147e-10	1.84991e-09		PRKAA2	1p32.2	-0.218216	7.31857e-10	5.48482e-09
	CCN6	6q21	0.224526	2.27175e-10	1.8568e-09		TAF1	Xq13.1	-0.218175	7.37311e-10	5.52362e-09
	RAB9A	Xp22.2	0.224514	2.27694e-10	1.86029e-09		TBC1D5	3p24.3	-0.218151	7.40635e-10	5.54438e-09
	ATP6V1F	7q32.1	0.22442	2.31734e-10	1.89098e-09		CPEB4	5q35.2	-0.218138	7.42374e-10	5.55532e-09
	KRT9	17q21.2	0.224264	2.38615e-10	1.94475e-09		RTN4RL1	17p13.3	-0.217956	7.67406e-10	5.73407e-09
	EPHX1	1q42.12	0.224245	2.3949e-10	1.95109e-09		PCLO	7q21.11	-0.217915	7.73184e-10	5.77294e-09
	CNNM1	10q24.2	0.22419	2.41987e-10	1.97064e-09		AOX2P	2q33.1	-0.217794	7.90373e-10	5.89468e-09
	MAP2K3	17p11.2	0.224093	2.46414e-10	2.00506e-09		UQCC1	20q11.22	-0.217783	7.92092e-10	5.9031e-09
	ATP5PO	21q22.11	0.224079	2.47095e-10	2.00978e-09		PDS5A	4p14	-0.217735	7.98972e-10	5.94995e-09
	LILRB4	19q13.42	0.224074	2.47304e-10	2.01066e-09		KCTD6	3p14.3	-0.217706	8.03176e-10	5.9775e-09
	MBNL1-AS1	3q25.1	0.223924	2.5439e-10	2.06325e-09		RNF34	12q24.31	-0.217706	8.03268e-10	5.9775e-09
	TMED9	5q35.3	0.223761	2.62261e-10	2.12364e-09		SNX25	4q35.1	-0.217678	8.0728e-10	6.00289e-09
	WDR4	21q22.3	0.223718	2.64379e-10	2.13926e-09		TCIM	8p11.21	-0.21765	8.11446e-10	6.02953e-09
	MTSS2	16q22.1	0.223685	2.66035e-10	2.15159e-09		ITGA3	17q21.33	-0.217621	8.15746e-10	6.0591e-09
	SH3TC2	5q32	0.223593	2.70651e-10	2.18717e-09		NUP210	3p25.1	-0.217577	8.22344e-10	6.10131e-09
	STAP1	4q13.2	0.223588	2.70941e-10	2.18862e-09		SLC7A8	14q11.2	-0.217573	8.2288e-10	6.10303e-09
	KARS1	16q23.1	0.223553	2.72719e-10	2.20209e-09		NEK11	3q22.1	-0.217568	8.23612e-10	6.10619e-09
	LAPTM4B	8q22.1	0.223493	2.75767e-10	2.22581e-09		TRPS1	8q23.3	-0.217454	8.41e-10	6.22819e-09
	TMEM71	8q24.22	0.223482	2.76328e-10	2.22944e-09		NCOR1	17p12-p11.2	-0.217404	8.48625e-10	6.27769e-09
	HAAO	2p21	0.223474	2.7676e-10	2.23203e-09		HIF1AN	10q24.31	-0.217385	8.51549e-10	6.297e-09
	NFE2L3	7p15.2	0.223455	2.77765e-10	2.23923e-09		POTEH	22q11.1	-0.217291	8.66259e-10	6.40105e-09
	DPM1	20q13.13	0.223442	2.78403e-10	2.24347e-09		SCAND2P	15q25.2	-0.217199	8.80883e-10	6.49712e-09
	DUSP2	2q11.2	0.223406	2.80332e-10	2.25719e-09		SHROOM3	4q21.1	-0.217104	8.96202e-10	6.60767e-09
	C11ORF24	11q13.2	0.223359	2.82811e-10	2.27625e-09		ASB8	12q13.11	-0.21701	9.11613e-10	6.70895e-09
	TPRXL	3p25.1	0.223344	2.83595e-10	2.28164e-09		TMCO3	13q34	-0.217001	9.13036e-10	6.71448e-09
	SLCO5A1	8q13.3	0.223299	2.86006e-10	2.30011e-09		GPR27	3p13	-0.216981	9.16341e-10	6.73632e-09
	CIAPIN1	16q21	0.223272	2.87425e-10	2.31059e-09		POLR2M	15q21.3	-0.216977	9.17112e-10	6.73951e-09
	SMS	Xp22.11	0.223213	2.90613e-10	2.33528e-09		PCSK4	19p13.3	-0.216833	9.41402e-10	6.91294e-09
	EIF2S2	20q11.22	0.223141	2.94582e-10	2.36433e-09		GP2	16p12.3	-0.216822	9.43181e-10	6.92346e-09
	IFNGR1	6q23.3	0.222967	3.0432e-10	2.44053e-09		INO80	15q15.1	-0.216777	9.50978e-10	6.97047e-09
	FCRLA	1q23.3	0.222963	3.04524e-10	2.44119e-09		USP19	3p21.31	-0.216723	9.60408e-10	7.03444e-09
	PICSAR	21q22.3	0.222915	3.07249e-10	2.46205e-09		HMG20A	15q24.3	-0.216605	9.81081e-10	7.17537e-09
	ADORA2B	17p12	0.222842	3.11454e-10	2.49375e-09		MDP1	14q12	-0.216542	9.92277e-10	7.25195e-09
	FBN3	19p13.2	0.222839	3.1168e-10	2.49456e-09		RNF123	3p21.31	-0.21648	1.0035e-09	7.33127e-09
	PIP5K1B	9q21.11	0.222771	3.15628e-10	2.52414e-09		LINC02210	17q21.31	-0.216328	1.03161e-09	7.52568e-09
	UCK2	1q24.1	0.222701	3.19791e-10	2.55336e-09		STON2	14q31.1	-0.216304	1.03599e-09	7.55485e-09
	CLDN8	21q22.11	0.222659	3.22304e-10	2.5683e-09		THPO	3q27.1	-0.216271	1.04216e-09	7.59436e-09
	CAPN2	1q41	0.222643	3.23282e-10	2.57507e-09		ZNF564	19p13.2	-0.21598	1.0986e-09	7.98527e-09
	FBXL18	7p22.1	0.222635	3.23738e-10	2.57767e-09		ERBB3	12q13.2	-0.215695	1.15662e-09	8.38876e-09
	CD3D	11q23.3	0.22251	3.31358e-10	2.63311e-09		TNFRSF14-AS1	1p36.32	-0.215608	1.17492e-09	8.50999e-09
	PRSS53	16p11.2	0.222479	3.33333e-10	2.64775e-09		FKTN	9q31.2	-0.215482	1.20185e-09	8.69162e-09
	ARL14	3q25.33	0.222465	3.34149e-10	2.65138e-09		ZFAND4	10q11.22	-0.215432	1.21274e-09	8.76721e-09
	LHX2	9q33.3	0.222465	3.34197e-10	2.65138e-09		EPX	17q22	-0.215426	1.214e-09	8.77236e-09
	HAUS7	Xq28	0.222463	3.34319e-10	2.65138e-09		SRRM2	16p13.3	-0.215425	1.21433e-09	8.77236e-09
	PPM1G	2p23.3	0.222453	3.34934e-10	2.65521e-09		NAPB	20p11.21	-0.215181	1.26867e-09	9.13527e-09
	NNMT	11q23.2	0.222326	3.42919e-10	2.71743e-09		C20ORF96	20p13	-0.215159	1.27382e-09	9.16465e-09
	EZH2	7q36.1	0.2223	3.44614e-10	2.72978e-09		SOCS6	18q22.2	-0.215158	1.27413e-09	9.16465e-09
	RTL8A	Xq26.3	0.222204	3.5085e-10	2.7737e-09		HECTD4	12q24.13	-0.215124	1.28178e-09	9.21308e-09
	CCDC134	22q13.2	0.222131	3.55646e-10	2.80939e-09		ESD	13q14.2	-0.215118	1.28335e-09	9.21777e-09
	FLNA	Xq28	0.22211	3.57039e-10	2.81929e-09		FAM98B	15q14	-0.21509	1.28962e-09	9.25945e-09
	LCT	2q21.3	0.22208	3.58984e-10	2.83352e-09		MAML3	4q31.1	-0.21506	1.29679e-09	9.30427e-09
	PRR5	22q13.31	0.222067	3.599e-10	2.83852e-09		ZNRF2P1	7p14.3	-0.215021	1.30587e-09	9.36274e-09
	NMT2	10p13	0.221913	3.70371e-10	2.91536e-09		TRUB1	10q25.3	-0.214994	1.31228e-09	9.40529e-09
	RHOF	12q24.31	0.221857	3.74179e-10	2.94309e-09		RRAGB	Xp11.21	-0.214969	1.31813e-09	9.44382e-09
	VSX2	14q24.3	0.221857	3.74188e-10	2.94309e-09		ZNF585B	19q13.12	-0.214866	1.34284e-09	9.60789e-09
	FERMT3	11q13.1	0.221803	3.77968e-10	2.97049e-09		PNPLA4	Xp22.31	-0.214865	1.34294e-09	9.60789e-09
	MED30	8q24.11	0.221643	3.89371e-10	3.05651e-09		CCDC196	14q23.3	-0.214849	1.34691e-09	9.63282e-09
	SPIB	19q13.33	0.221558	3.95546e-10	3.10255e-09		TIGD6	5q32	-0.214778	1.36418e-09	9.74933e-09
	S1PR4	19p13.3	0.221512	3.98937e-10	3.12792e-09		RRN3	16p13.11	-0.214721	1.37813e-09	9.83851e-09
	TAGLN2	1q23.2	0.221487	4.00815e-10	3.14142e-09		RMND5B	5q35.3	-0.214706	1.38187e-09	9.86171e-09
	PNRC1	6q15	0.22144	4.04316e-10	3.16638e-09		HSPB8	12q24.23	-0.214344	1.47469e-09	1.04942e-08
	NFKBIE	6p21.1	0.221353	4.10917e-10	3.21555e-09		COPB1	11p15.2	-0.214253	1.49891e-09	1.0659e-08
	MAFB	20q12	0.221233	4.20187e-10	3.28553e-09		COG1	17q25.1	-0.214171	1.52095e-09	1.08003e-08
	CXCL13	4q21.1	0.221088	4.31605e-10	3.37218e-09		TSPAN31	12q14.1	-0.214074	1.54759e-09	1.09701e-08
	COLEC11	2p25.3	0.22105	4.34652e-10	3.39334e-09		FBXW8	12q24.22	-0.21407	1.54869e-09	1.0974e-08
	H1-5	6p22.1	0.221031	4.36135e-10	3.40358e-09		MEIS3	19q13.32	-0.214033	1.55913e-09	1.10441e-08
	TRAF1	9q33.2	0.220965	4.41543e-10	3.44177e-09		LINC00593	15q23	-0.214007	1.56636e-09	1.10913e-08
	TMOD1	9q22.33	0.220922	4.45028e-10	3.46758e-09		GOLGA2P5	12q23.1	-0.214004	1.56711e-09	1.10927e-08
	C6ORF15	6p21.33	0.220852	4.50895e-10	3.50784e-09		TRMT10A	4q23	-0.213949	1.58273e-09	1.11875e-08
	C11ORF71	11q23.2	0.220844	4.51482e-10	3.51104e-09		ALDH5A1	6p22.3	-0.213883	1.60148e-09	1.12961e-08
	STK40	1p34.3	0.220805	4.54788e-10	3.53401e-09		DCAF8	1q23.2	-0.21375	1.64007e-09	1.15439e-08
	ZFTA	11q13.1	0.220786	4.56359e-10	3.54347e-09		CCNB3	Xp11.22	-0.213714	1.65068e-09	1.16145e-08
	UCA1	19p13.12	0.220763	4.58365e-10	3.55766e-09		FAM167A	8p23.1	-0.213679	1.6609e-09	1.16823e-08
	TGM2	20q11.23	0.220682	4.65281e-10	3.60574e-09		FGF10	5p12	-0.213601	1.68406e-09	1.18328e-08
	LINC02610	2q37.3	0.220629	4.6986e-10	3.63842e-09		ZNF281	1q32.1	-0.213595	1.68589e-09	1.18414e-08
	TYRO3	15q15.1	0.220592	4.73059e-10	3.66036e-09		TUBA3D	2q21.1	-0.213546	1.70068e-09	1.19412e-08
	CAV2	7q31.2	0.220468	4.84028e-10	3.74234e-09		RET	10q11.21	-0.213446	1.73143e-09	1.21527e-08
	CLDN23	8p23.1	0.220211	5.07524e-10	3.91521e-09		ZNF441	19p13.2	-0.213369	1.75537e-09	1.23122e-08
	TCN2	22q12.2	0.220154	5.12889e-10	3.95327e-09		H4-16	12p12.3	-0.213162	1.82137e-09	1.27362e-08
	PMM2	16p13.2	0.220112	5.16852e-10	3.98075e-09		TMEM25	11q23.3	-0.213162	1.82155e-09	1.27362e-08
	LSM6	4q31.22	0.219986	5.28991e-10	4.06799e-09		ZNF624	17p11.2	-0.213129	1.83216e-09	1.28059e-08
	TRIP10	19p13.3	0.219939	5.33577e-10	4.10011e-09		TNPO1	5q13.2	-0.213101	1.84141e-09	1.28661e-08
	KIAA0513	16q24.1	0.219915	5.35984e-10	4.11387e-09		GAK	4p16.3	-0.213066	1.85267e-09	1.29403e-08
	CLUH	17p13.3	0.219868	5.40598e-10	4.1461e-09		SMCR8	17p11.2	-0.212911	1.90463e-09	1.32846e-08
	NWD1	19p13.11	0.219839	5.43495e-10	4.16672e-09		MS4A8	11q12.2	-0.212864	1.92064e-09	1.3387e-08
	LILRA6	19q13.42	0.219716	5.5593e-10	4.25879e-09		ELP1	9q31.3	-0.21286	1.92192e-09	1.33912e-08
	DDX27	20q13.13	0.219703	5.57288e-10	4.26593e-09		CCDC57	17q25.3	-0.212704	1.97616e-09	1.37309e-08
	PLCG2	16q24.1	0.219628	5.65023e-10	4.32185e-09		UBE2B	5q31.1	-0.212596	2.01451e-09	1.3978e-08
	SGK1	6q23.2	0.219616	5.66281e-10	4.32981e-09		TTC36	11q23.3	-0.212593	2.01555e-09	1.39804e-08
	ZYG11A	1p32.3	0.219585	5.69511e-10	4.35284e-09		LRRIQ3	1p31.1	-0.212562	2.02664e-09	1.40476e-08
	PDCD5	19q13.11	0.219533	5.7495e-10	4.39106e-09		HSH2D	19p13.11	-0.212547	2.03192e-09	1.40696e-08
	AHSA1	14q24.3	0.219415	5.87621e-10	4.481e-09		BBS2	16q13	-0.212536	2.03613e-09	1.40939e-08
	OSTF1	9q21.13	0.21927	6.03384e-10	4.59771e-09		EARS2	16p12.2	-0.212521	2.04139e-09	1.41254e-08
	VSIR	10q22.1	0.21926	6.04528e-10	4.60467e-09		MAP2K5	15q23	-0.212519	2.04214e-09	1.41257e-08
	TIFAB	5q31.1	0.219234	6.07392e-10	4.62297e-09		PALM	19p13.3	-0.212438	2.07188e-09	1.43166e-08
	PLA2G2D	1p36.12	0.219177	6.13764e-10	4.66614e-09		PHLDB3	19q13.31	-0.212409	2.08245e-09	1.43797e-08
	FKBP1A	20p13	0.219131	6.19034e-10	4.70085e-09		B4GAT1	11q13.2	-0.212328	2.1127e-09	1.45635e-08
	CDHR1	10q23.1	0.219122	6.20061e-10	4.70687e-09		C12ORF29	12q21.32	-0.212275	2.13244e-09	1.46894e-08
	SLC34A2	4p15.2	0.219085	6.24223e-10	4.73488e-09		ZNF680	7q11.21	-0.212199	2.16158e-09	1.48697e-08
	NOD2	16q12.1	0.219062	6.26902e-10	4.75339e-09		IP6K1	3p21.31	-0.212118	2.19291e-09	1.50542e-08
	IL4R	16p12.1	0.219026	6.31096e-10	4.78338e-09		FAM219B	15q24.1-q24.2	-0.212076	2.20918e-09	1.51555e-08
	CUTC	10q24.2	0.219001	6.34006e-10	4.80362e-09		GATAD1	7q21.2	-0.212053	2.21812e-09	1.52116e-08
	DNAJB5	9p13.3	0.218963	6.3837e-10	4.83303e-09		TMC3	15q25.1	-0.21204	2.22321e-09	1.52309e-08
	EED	11q14.2	0.218838	6.53222e-10	4.938e-09		VPS8	3q27.2	-0.212035	2.22512e-09	1.52387e-08
	SYT8	11p15.5	0.218831	6.5399e-10	4.94195e-09		RAPGEF6	5q31.1	-0.211913	2.27408e-09	1.55262e-08
	ELOC	8q21.11	0.218819	6.55398e-10	4.94885e-09		DNAAF1	16q24.1	-0.211887	2.28424e-09	1.5585e-08
	POU2AF1	11q23.1	0.218785	6.59494e-10	4.9779e-09		TFF1	21q22.3	-0.211873	2.29015e-09	1.562e-08
	JOSD1	22q13.1	0.218751	6.63682e-10	5.00763e-09		PISD	22q12.2	-0.211871	2.29095e-09	1.56201e-08
	ATP5PF	21q21.3	0.218739	6.65077e-10	5.01626e-09		IGSF1	Xq25	-0.211857	2.29672e-09	1.56506e-08
	GJB3	1p34.3	0.218719	6.67576e-10	5.03321e-09		ZNF197	3p21.31	-0.211826	2.30923e-09	1.5718e-08
	RPS6KB2	11q13.2	0.218698	6.70079e-10	5.05018e-09		AMDHD1	12q23.1	-0.211796	2.3214e-09	1.57915e-08
	ODF2L	1p22.3	0.21868	6.72366e-10	5.06551e-09		CLBA1	14q32.33	-0.211796	2.32161e-09	1.57915e-08
	AMMECR1	Xq23	0.218663	6.74448e-10	5.07928e-09		NXNL2	9q22.1	-0.211793	2.32265e-09	1.57929e-08
	LYPLA2P1	6p21.32	0.218562	6.87076e-10	5.17244e-09		TMEM41B	11p15.4	-0.211791	2.32338e-09	1.57929e-08
	PFN1	17p13.2	0.218551	6.88376e-10	5.18028e-09		ZNF420	19q13.12	-0.211751	2.34e-09	1.59004e-08
	PPIE	1p34.2	0.218526	6.91554e-10	5.20224e-09		SIGIRR	11p15.5	-0.211725	2.35099e-09	1.59643e-08
	NKX1-2	10q26.13	0.218461	6.99783e-10	5.26217e-09		PHF2	9q22.31	-0.211706	2.35879e-09	1.60103e-08
	MOGS	2p13.1	0.218393	7.08568e-10	5.32423e-09		MAPKBP1	15q15.1	-0.211698	2.36196e-09	1.60224e-08
	CMTM7	3p22.3	0.218287	7.22398e-10	5.42611e-09		PLIN5	19p13.3	-0.211662	2.37698e-09	1.61134e-08
	MMP19	12q13.2	0.218279	7.23486e-10	5.43225e-09		CDKL3	5q31.1	-0.211562	2.41942e-09	1.639e-08
	GLT1D1	12q24.33	0.218262	7.25783e-10	5.44541e-09		SERPINA6	14q32.13	-0.211556	2.42231e-09	1.6404e-08
	DDC	7p12.2-p12.1	0.218244	7.28157e-10	5.46118e-09		ANKHD1-EIF4EBP3	5q31.3	-0.211547	2.42604e-09	1.64238e-08
	RNASET2	6q27	0.218216	7.31804e-10	5.48482e-09		IRS2	13q34	-0.211502	2.44525e-09	1.65482e-08
	CHODL	21q21.1	0.218162	7.39111e-10	5.53504e-09		YTHDC1	4q13.2	-0.211439	2.47288e-09	1.67182e-08
	POC1A	3p21.2	0.21813	7.43398e-10	5.56091e-09		INTS2	17q23.2	-0.211292	2.53791e-09	1.71347e-08
	GGT6	17p13.2	0.21806	7.53042e-10	5.63095e-09		PIGS	17q11.2	-0.211267	2.54903e-09	1.71982e-08
	CRYM	16p12.2	0.218058	7.53332e-10	5.63101e-09		TRPM7	15q21.2	-0.211229	2.56597e-09	1.72892e-08
	KDELR3	22q13.1	0.217927	7.71436e-10	5.76203e-09		B3GALNT1	3q26.1	-0.211143	2.60557e-09	1.75194e-08
	CYP2J2	1p32.1	0.217906	7.74397e-10	5.77984e-09		N4BP2	4p14	-0.211095	2.62781e-09	1.76524e-08
	RYR3	15q13.3-q14	0.217822	7.86361e-10	5.86694e-09		ZNF791	19p13.13	-0.21109	2.6298e-09	1.76599e-08
	PRAC2	17q21.32	0.217791	7.90803e-10	5.8957e-09		SLC35E2A	1p36.33	-0.210868	2.73508e-09	1.82994e-08
	LGI2	4p15.2	0.217763	7.94984e-10	5.92245e-09		BZW1	2q33.1	-0.210791	2.77224e-09	1.85294e-08
	MYL12A	18p11.31	0.217698	8.0432e-10	5.9831e-09		RBM43	2q23.3	-0.210711	2.8116e-09	1.87737e-08
	KCNJ4	22q13.1	0.21765	8.11464e-10	6.02953e-09		CDKN2AIP	4q35.1	-0.210664	2.83494e-09	1.89169e-08
	KRT2	12q13.13	0.217612	8.17102e-10	6.06691e-09		ZNF599	19q13.11	-0.210567	2.88361e-09	1.92161e-08
	SLC37A4	11q23.3	0.217601	8.18744e-10	6.07685e-09		ZNF134	19q13.43	-0.210502	2.91669e-09	1.94301e-08
	ITGB7	12q13.13	0.217485	8.36215e-10	6.19734e-09		TRMT9B	8p22	-0.210481	2.92784e-09	1.94978e-08
	KRT39	17q21.2	0.217476	8.37574e-10	6.20511e-09		TPH1	11p15.1	-0.210351	2.99509e-09	1.9906e-08
	PSMA7	20q13.33	0.217438	8.43421e-10	6.24381e-09		SPICE1	3q13.2	-0.210294	3.02565e-09	2.00957e-08
	CD79A	19q13.2	0.217406	8.48229e-10	6.27708e-09		CUL3	2q36.2	-0.210132	3.11286e-09	2.06612e-08
	SAPCD2	9q34.3	0.217306	8.63921e-10	6.38613e-09		ANKRD42	11q14.1	-0.210073	3.1451e-09	2.08614e-08
	PLBD1	12p13.1	0.217285	8.6722e-10	6.40579e-09		NEK9	14q24.3	-0.209965	3.20541e-09	2.12193e-08
	TONSL	8q24.3	0.217274	8.68958e-10	6.41625e-09		SNORD116-28	15q11.2	-0.209882	3.25231e-09	2.15084e-08
	RPH3A	12q24.13	0.217218	8.77848e-10	6.47951e-09		NUDT16	3q22.1	-0.209858	3.26581e-09	2.15835e-08
	PELI1	2p14	0.217214	8.78456e-10	6.48161e-09		ATRNL1	10q25.3	-0.209813	3.29198e-09	2.17423e-08
	PPP1R18	6p21.33	0.217096	8.97557e-10	6.61523e-09		DCDC2	6p22.3	-0.209813	3.29201e-09	2.17423e-08
	LINC00592	12q13.13	0.21709	8.98508e-10	6.6198e-09		RICTOR	5p13.1	-0.209804	3.2971e-09	2.17615e-08
	PIK3CD	1p36.22	0.217065	9.02511e-10	6.64685e-09		SRRM3	7q11.23	-0.209782	3.31e-09	2.18323e-08
	U2AF1L4	19q13.12	0.217032	9.07965e-10	6.68456e-09		SHC2	19p13.3	-0.209774	3.31458e-09	2.18553e-08
	DOK2	8p21.3	0.217004	9.12522e-10	6.71317e-09		ATP8B3	19p13.3	-0.209762	3.32136e-09	2.18928e-08
	CRISP3	6p12.3	0.216866	9.35681e-10	6.87344e-09		CFAP44	3q13.2	-0.209669	3.3763e-09	2.22183e-08
	GAS1	9q21.33	0.216819	9.43761e-10	6.92518e-09		ANKLE2	12q24.33	-0.209637	3.39488e-09	2.23333e-08
	ITGB1BP1	2p25.1	0.216812	9.45012e-10	6.93182e-09		USP37	2q35	-0.209614	3.40865e-09	2.24092e-08
	LY9	1q23.3	0.216784	9.49803e-10	6.96441e-09		SRARP	1p36.13	-0.209585	3.42578e-09	2.25069e-08
	NIPAL1	4p12	0.216741	9.57136e-10	7.01304e-09		PFAS	17p13.1	-0.209419	3.52734e-09	2.31438e-08
	TBX21	17q21.32	0.216714	9.61811e-10	7.04215e-09		PRDM11	11p11.2	-0.209252	3.63138e-09	2.37797e-08
	OSCAR	19q13.42	0.216704	9.63677e-10	7.05323e-09		ANGEL2	1q32.3	-0.209246	3.63543e-09	2.37984e-08
	GLB1	3p22.3	0.216653	9.72647e-10	7.11628e-09		TRMO	9q22.33	-0.209207	3.65999e-09	2.39436e-08
	IL32	16p13.3	0.216575	9.86439e-10	7.21192e-09		NHLRC4	16p13.3	-0.209138	3.70491e-09	2.42216e-08
	PABPC3	13q12.13	0.216459	1.00746e-09	7.35752e-09		PIGN	18q21.33	-0.209097	3.73105e-09	2.43686e-08
	CT83	Xq23	0.216428	1.01308e-09	7.39589e-09		EPC2	2q23.1	-0.209079	3.74305e-09	2.44391e-08
	MAMLD1	Xq28	0.216408	1.01669e-09	7.41953e-09		ZNF584	19q13.43	-0.209	3.79487e-09	2.47613e-08
	ALPK2	18q21.31-q21.32	0.216294	1.03793e-09	7.56629e-09		GCC2	2q12.3	-0.208944	3.83202e-09	2.49581e-08
	CD2	1p13.1	0.216268	1.04282e-09	7.59642e-09		FHDC1	4q31.3	-0.208916	3.85083e-09	2.50692e-08
	SOWAHD	Xq24	0.216182	1.05907e-09	7.71198e-09		ZNF780B	19q13.2	-0.208764	3.95471e-09	2.56953e-08
	SPRR2D	1q21.3	0.216151	1.06512e-09	7.75317e-09		MTMR4	17q22	-0.208743	3.96928e-09	2.57817e-08
	DHDH	19q13.33	0.216123	1.07044e-09	7.78655e-09		ATXN10	22q13.31	-0.208612	4.0609e-09	2.63341e-08
	NDUFAF4	6q16.1	0.216123	1.07048e-09	7.78655e-09		LMAN2L	2q11.2	-0.208577	4.08548e-09	2.64848e-08
	SF3B5	6q24.2	0.216045	1.08576e-09	7.89484e-09		FEM1B	15q23	-0.208559	4.09812e-09	2.65582e-08
	IL18RAP	2q12.1	0.215888	1.11693e-09	8.11558e-09		SREK1IP1	5q12.3	-0.208538	4.11308e-09	2.66465e-08
	PLAU	10q22.2	0.215805	1.13383e-09	8.23541e-09		CHDH	3p21.1	-0.208444	4.18102e-09	2.70691e-08
	DUOXA1	15q21.1	0.215785	1.13788e-09	8.26182e-09		NR2E3	15q23	-0.208382	4.22629e-09	2.73358e-08
	MAF1	8q24.3	0.215772	1.14056e-09	8.27826e-09		FLNB	3p14.3	-0.208329	4.26596e-09	2.75656e-08
	GPR132	14q32.33	0.215708	1.15394e-09	8.37236e-09		SPART	13q13.3	-0.208307	4.28185e-09	2.76593e-08
	PYHIN1	1q23.1	0.215685	1.15862e-09	8.40019e-09		RNF165	18q21.1	-0.208277	4.30418e-09	2.77857e-08
	UBASH3B	11q24.1	0.215636	1.16896e-09	8.47208e-09		SPINK4	9p13.3	-0.208229	4.34095e-09	2.8005e-08
	HORMAD1	1q21.3	0.215607	1.17504e-09	8.50999e-09		STAG2	Xq25	-0.208087	4.44902e-09	2.86501e-08
	NPW	16p13.3	0.215599	1.17685e-09	8.52002e-09		KRT37	17q21.2	-0.208038	4.48718e-09	2.8874e-08
	ALS2CL	3p21.31	0.215571	1.1826e-09	8.5586e-09		LRRC37A	17q21.31	-0.2079	4.59561e-09	2.94864e-08
	MINDY4	7p14.3	0.21554	1.18935e-09	8.60434e-09		BCORL1	Xq26.1	-0.207861	4.62726e-09	2.968e-08
	KRT6C	12q13.13	0.215416	1.21631e-09	8.78348e-09		PAK1	11q13.5-q14.1	-0.207789	4.68542e-09	3.00242e-08
	IL1R1	2q11.2-q12.1	0.215403	1.21913e-09	8.80065e-09		NAV2	11p15.1	-0.2077	4.75798e-09	3.04502e-08
	SIRPG	20p13	0.215389	1.22208e-09	8.81881e-09		ULK4	3p22.1	-0.207655	4.79567e-09	3.06718e-08
	MYRF	11q12.2	0.215316	1.23832e-09	8.93278e-09		NAV1	1q32.1	-0.207576	4.86172e-09	3.10744e-08
	APOE	19q13.32	0.215296	1.24271e-09	8.96121e-09		SUOX	12q13.2	-0.207534	4.89699e-09	3.12699e-08
	CHAC2	2p16.2	0.215289	1.24428e-09	8.96929e-09		CDAN1	15q15.2	-0.207421	4.99399e-09	3.18689e-08
	ZBTB21	21q22.3	0.215282	1.24587e-09	8.9775e-09		BRD2	6p21.32	-0.207404	5.00912e-09	3.19553e-08
	EVA1C	21q22.11	0.2152	1.26449e-09	9.10843e-09		KLHL9	9p21.3	-0.207326	5.07644e-09	3.23538e-08
	CRHR1	17q21.31	0.215162	1.27308e-09	9.16368e-09		DUSP28	2q37.3	-0.207299	5.10041e-09	3.24859e-08
	NUGGC	8p21.1	0.215143	1.27752e-09	9.18578e-09		EAPP	14q13.1	-0.207152	5.23189e-09	3.32754e-08
	MTERF3	8q22.1	0.215122	1.28229e-09	9.21347e-09		KATNAL1	13q12.3	-0.207006	5.3657e-09	3.40673e-08
	AP1M1	19p13.11	0.215088	1.29029e-09	9.26093e-09		KIF6	6p21.2	-0.206993	5.37746e-09	3.41311e-08
	EML6	2p16.1	0.215021	1.30583e-09	9.36274e-09		COPS4	4q21.22	-0.206953	5.41472e-09	3.43458e-08
	CXCR6	3p21.31	0.21496	1.32019e-09	9.45524e-09		NAP1L5	4q22.1	-0.206919	5.44729e-09	3.45305e-08
	ITGB2	21q22.3	0.214896	1.33555e-09	9.56178e-09		ABCA5	17q24.3	-0.206877	5.48663e-09	3.47579e-08
	COMMD7	20q11.21	0.214835	1.35016e-09	9.65261e-09		GOLPH3L	1q21.3	-0.206741	5.61733e-09	3.55286e-08
	PDLIM3	4q35.1	0.214766	1.36712e-09	9.76688e-09		BTBD1	15q25.2	-0.206739	5.61893e-09	3.55286e-08
	PHEX	Xp22.11	0.214728	1.37645e-09	9.83006e-09		ADGRL1	19p13.12	-0.206691	5.66591e-09	3.57917e-08
	C2ORF88	2q32.2	0.214652	1.39524e-09	9.95356e-09		SLC22A24	11q12.3	-0.20665	5.70569e-09	3.60203e-08
	VIM	10p13	0.214648	1.39639e-09	9.95822e-09		TPPP	5p15.33	-0.206489	5.86635e-09	3.69414e-08
	PDK1	2q31.1	0.214636	1.39927e-09	9.97521e-09		RERE	1p36.23	-0.206462	5.89452e-09	3.71071e-08
	RIPOR2	6p22.3	0.214606	1.40683e-09	1.00255e-08		UTP15	5q13.2	-0.206457	5.89876e-09	3.71222e-08
	HECA	6q24.1	0.214527	1.42701e-09	1.01657e-08		DNAJB14	4q23	-0.206438	5.91816e-09	3.72326e-08
	TMEM164	Xq23	0.21447	1.44156e-09	1.02657e-08		NDUFAF1	15q15.1	-0.206344	6.01462e-09	3.78156e-08
	ACSL4	Xq23	0.214452	1.44618e-09	1.0295e-08		LRRFIP1	2q37.3	-0.206308	6.05225e-09	3.80403e-08
	RBM17	10p15.1	0.214302	1.48567e-09	1.05686e-08		CCDC96	4p16.1	-0.206229	6.13581e-09	3.85413e-08
	CASP10	2q33.1	0.21423	1.50503e-09	1.06987e-08		ACVR1B	12q13.13	-0.206191	6.17566e-09	3.87551e-08
	C10ORF105	10q22.1	0.214227	1.50591e-09	1.07011e-08		C2ORF27A	2q21.2	-0.206146	6.22411e-09	3.90469e-08
	UBE2V2	8q11.21	0.214172	1.52066e-09	1.08003e-08		SLC22A15	1p13.1	-0.206107	6.26536e-09	3.9243e-08
	GRAMD1B	11q24.1	0.214136	1.53066e-09	1.08647e-08		PROB1	5q31.2	-0.205992	6.39121e-09	3.99451e-08
	CD52	1p36.11	0.214134	1.53109e-09	1.08647e-08		ZBTB14	18p11.31	-0.20596	6.42653e-09	4.01157e-08
	OST4	2p23.3	0.214122	1.53427e-09	1.08834e-08		FAM174B	15q26.1	-0.2059	6.49305e-09	4.04931e-08
	GMPS	3q25.31	0.214103	1.53973e-09	1.09182e-08		DCAF10	9p13.2	-0.205896	6.49747e-09	4.05081e-08
	VAT1L	16q23.1	0.213992	1.57051e-09	1.11106e-08		CEP44	4q34.1	-0.205834	6.56656e-09	4.09133e-08
	HCST	19q13.12	0.21399	1.57106e-09	1.11106e-08		H2BC5	6p22.2	-0.205823	6.57916e-09	4.09663e-08
	JDP2	14q24.3	0.213989	1.57129e-09	1.11106e-08		NFE2L1	17q21.32	-0.205812	6.59213e-09	4.10306e-08
	DDX19A	16q22.1	0.213932	1.5876e-09	1.12179e-08		SMARCAD1	4q22.3	-0.20581	6.59358e-09	4.10306e-08
	FCRL5	1q23.1	0.213918	1.59157e-09	1.1242e-08		TTC30A	2q31.2	-0.205673	6.75099e-09	4.19189e-08
	ZBED2	3q13.13	0.21391	1.59362e-09	1.12525e-08		HTR1E	6q14.3	-0.205633	6.79697e-09	4.21783e-08
	HLA-F	6p22.1	0.213893	1.5985e-09	1.12802e-08		FAF2	5q35.2	-0.205565	6.87728e-09	4.26502e-08
	NASP	1p34.1	0.213893	1.59866e-09	1.12802e-08		TSPAN13	7p21.1	-0.205528	6.92109e-09	4.29086e-08
	C10ORF99	10q23.1	0.213865	1.60665e-09	1.13286e-08		P2RX4	12q24.31	-0.205512	6.94053e-09	4.30025e-08
	MANF	3p21.2	0.213846	1.61203e-09	1.13625e-08		RTF1	15q15.1	-0.205483	6.97411e-09	4.31705e-08
	SRSF12	6q15	0.213831	1.61648e-09	1.13899e-08		TNNT1	19q13.42	-0.205456	7.0066e-09	4.33582e-08
	HOXA1	7p15.2	0.213825	1.61821e-09	1.1398e-08		ZNF543	19q13.43	-0.205431	7.03738e-09	4.35218e-08
	LEMD1	1q32.1	0.213776	1.63248e-09	1.14945e-08		ZNF430	19p12	-0.205423	7.04647e-09	4.35645e-08
	CXCL8	4q13.3	0.213665	1.66518e-09	1.17083e-08		HNRNPDL	4q21.22	-0.205257	7.25019e-09	4.4755e-08
	DUS2	16q22.1	0.213655	1.66817e-09	1.17252e-08		TMEM106B	7p21.3	-0.205218	7.29861e-09	4.49983e-08
	HLA-DMA	6p21.32	0.213425	1.73807e-09	1.21951e-08		YPEL2	17q22	-0.20512	7.42158e-09	4.56862e-08
	NPM3	10q24.32	0.213352	1.76074e-09	1.23455e-08		TFAP2A	6p24.3	-0.205035	7.53125e-09	4.6347e-08
	RRP1	21q22.3	0.213295	1.77872e-09	1.24672e-08		PKP4	2q24.1	-0.205022	7.54776e-09	4.64201e-08
	PRDX1	1p34.1	0.213281	1.78313e-09	1.24938e-08		FMN1	15q13.3	-0.205001	7.5752e-09	4.6574e-08
	LAT	16q13	0.213276	1.78461e-09	1.24998e-08		GAPVD1	9q33.3	-0.204999	7.57744e-09	4.6574e-08
	DIRC3	2q35	0.213251	1.79268e-09	1.25519e-08		ATP6AP1L	5q14.2	-0.204923	7.6761e-09	4.71371e-08
	AMY1A	1p21.1	0.213228	1.80002e-09	1.25989e-08		POLL	10q24.32	-0.204861	7.7591e-09	4.76321e-08
	COQ9	16q21	0.213182	1.81482e-09	1.26981e-08		SBK2	19q13.42	-0.204834	7.79487e-09	4.78224e-08
	CD101	1p13.1	0.213062	1.85401e-09	1.29451e-08		MARCHF8	10q11.21-q11.22	-0.204797	7.84338e-09	4.81053e-08
	CD27	12p13.31	0.212976	1.88261e-09	1.31402e-08		ZNF311	6p22.1	-0.204779	7.8682e-09	4.82427e-08
	TIMMDC1	3q13.33	0.212932	1.89742e-09	1.3239e-08		PLPP6	9p24.1	-0.204769	7.88184e-09	4.83116e-08
	MRGBP	20q13.33	0.212892	1.91113e-09	1.33253e-08		TRMT10B	9p13.2	-0.204727	7.9381e-09	4.86118e-08
	GORASP2	2q31.1	0.21281	1.93915e-09	1.35066e-08		PHC3	3q26.2	-0.20469	7.98916e-09	4.88796e-08
	MAP7D2	Xp22.12	0.21277	1.95314e-09	1.35993e-08		MARF1	16p13.11	-0.204657	8.03325e-09	4.91343e-08
	CHST6	16q23.1	0.212764	1.95519e-09	1.36089e-08		EEF1DP3	13q13.1	-0.204611	8.09667e-09	4.9492e-08
	OR10Q1	11q12.1	0.212739	1.96396e-09	1.36651e-08		ASB15	7q31.32	-0.20453	8.20949e-09	5.01051e-08
	PDE4D	5q11.2-q12.1	0.212727	1.96809e-09	1.36891e-08		PHKA1	Xq13.1	-0.204478	8.28337e-09	5.05407e-08
	CPLX3	15q24.1	0.21271	1.97386e-09	1.37245e-08		GALNT7	4q34.1	-0.204475	8.28786e-09	5.05527e-08
	TSPAN33	7q32.1	0.212706	1.97541e-09	1.37305e-08		FAM226B	Xq13.1	-0.204456	8.31369e-09	5.06793e-08
	CTU2	16q24.3	0.212637	1.9997e-09	1.38897e-08		SLC9A3R1	17q25.1	-0.204447	8.32769e-09	5.07492e-08
	ABCF2	7q36.1	0.212632	2.00161e-09	1.38981e-08		RNASEL	1q25.3	-0.204436	8.34311e-09	5.08278e-08
	AICDA	12p13.31	0.212608	2.01024e-09	1.39532e-08		RFX7	15q21.3	-0.204324	8.50302e-09	5.16918e-08
	SLC7A6	16q22.1	0.212589	2.01686e-09	1.39846e-08		TMEM184C	4q31.23	-0.204318	8.51215e-09	5.17317e-08
	TDO2	4q32.1	0.212553	2.02971e-09	1.40596e-08		ZNF225	19q13.31	-0.204268	8.58524e-09	5.21126e-08
	IGFBPL1	9p13.1	0.212553	2.02978e-09	1.40596e-08		ZNF181	19q13.11	-0.204175	8.72197e-09	5.28785e-08
	BCAT1	12p12.1	0.212463	2.0625e-09	1.42616e-08		RBM12	20q11.22	-0.204115	8.81148e-09	5.33888e-08
	DHTKD1	10p14	0.212457	2.06486e-09	1.4273e-08		ZNF230	19q13.31	-0.20406	8.89485e-09	5.3845e-08
	L3HYPDH	14q23.1	0.212413	2.08103e-09	1.43749e-08		PCAT18	18q11.2	-0.204014	8.9654e-09	5.42393e-08
	PLCB3	11q13.1	0.212368	2.09748e-09	1.44785e-08		ZNF510	9q22.33	-0.203937	9.0837e-09	5.49053e-08
	GTF3C6	6q21	0.212365	2.09881e-09	1.44827e-08		RBM47	4p14	-0.203907	9.12908e-09	5.51629e-08
	IL18BP	11q13.4	0.212362	2.09985e-09	1.44849e-08		ANKAR	2q32.2	-0.203854	9.21211e-09	5.56478e-08
	CALHM6	6q22.1	0.212358	2.10132e-09	1.449e-08		AP3B1	5q14.1	-0.203698	9.4595e-09	5.70392e-08
	SLAMF7	1q23.3	0.212308	2.12017e-09	1.46099e-08		ZNF497	19q13.43	-0.203698	9.45953e-09	5.70392e-08
	OLIG1	21q22.11	0.212268	2.13519e-09	1.47033e-08		WDR73	15q25.2	-0.203675	9.49768e-09	5.72003e-08
	SLC28A3	9q21.32-q21.33	0.212247	2.14322e-09	1.47535e-08		BCAN	1q23.1	-0.203601	9.61646e-09	5.78634e-08
	DUSP22	6p25.3	0.21223	2.14977e-09	1.47935e-08		SRGAP1	12q14.2	-0.2036	9.61952e-09	5.78645e-08
	CWC15	11q21	0.212189	2.16536e-09	1.48906e-08		ZNF100	19p13.1	-0.203542	9.71438e-09	5.83967e-08
	ATAD3A	1p36.33	0.212177	2.17e-09	1.49173e-08		AK8	9q34.13	-0.203521	9.74798e-09	5.85669e-08
	FRMD8	11q13.1	0.212168	2.17329e-09	1.49348e-08		CENPC	4q13.2	-0.203495	9.79166e-09	5.87764e-08
	OLFM2	19p13.2	0.212145	2.18219e-09	1.49909e-08		AKAP11	13q14.11	-0.203447	9.87198e-09	5.91788e-08
	CAP1	1p34.2	0.212135	2.18625e-09	1.50136e-08		THG1L	5q33.3	-0.203446	9.87347e-09	5.91788e-08
	RALY	20q11.22	0.21209	2.20361e-09	1.51225e-08		EPM2AIP1	3p22.2	-0.20343	9.90078e-09	5.93152e-08
	POP7	7q22.1	0.21205	2.21948e-09	1.5214e-08		DEGS2	14q32.2	-0.20338	9.98455e-09	5.97551e-08
	SLC34A1	5q35.3	0.212048	2.21999e-09	1.5214e-08		GSTCD	4q24	-0.203364	1.0012e-08	5.98838e-08
	C19ORF47	19q13.2	0.211987	2.2441e-09	1.53633e-08		QRICH1	3p21.31	-0.203336	1.00605e-08	6.01555e-08
	IGSF3	1p13.1	0.211986	2.24485e-09	1.53633e-08		ZNF407-AS1	18q22.3	-0.203239	1.02268e-08	6.10951e-08
	NKX2-3	10q24.2	0.211971	2.25044e-09	1.53963e-08		C10ORF88	10q26.13	-0.203198	1.02974e-08	6.14987e-08
	AGPAT4-IT1	6q26	0.21196	2.2549e-09	1.54189e-08		ARFIP2	11p15.4	-0.203193	1.03061e-08	6.15326e-08
	UBE2E2	3p24.3	0.211959	2.25528e-09	1.54189e-08		RLN1	9p24.1	-0.203184	1.0322e-08	6.16087e-08
	ZFP36L1	14q24.1	0.211956	2.25664e-09	1.54229e-08		SPOPL	2q22.1	-0.203088	1.04926e-08	6.26083e-08
	CCL20	2q36.3	0.211939	2.26343e-09	1.54641e-08		VPS4B	18q21.33	-0.203006	1.06394e-08	6.34467e-08
	MTHFSD	16q24.1	0.211931	2.26676e-09	1.54816e-08		CFAP92	3q21.3	-0.202988	1.06715e-08	6.36193e-08
	C3	19p13.3	0.211887	2.28421e-09	1.5585e-08		ENPP4	6p21.1	-0.202972	1.06996e-08	6.37677e-08
	CRYBG2	1p36.11	0.211855	2.2973e-09	1.56506e-08		KPNB1	17q21.32	-0.202693	1.12182e-08	6.66797e-08
	APOC1	19q13.32	0.211854	2.29777e-09	1.56506e-08		MPDZ	9p23	-0.20263	1.13381e-08	6.73727e-08
	SRF	6p21.1	0.211832	2.30669e-09	1.57061e-08		MAPRE3	2p23.3	-0.202628	1.13417e-08	6.73742e-08
	CHST2	3q24	0.211741	2.34423e-09	1.59238e-08		CLHC1	2p16.1	-0.202481	1.16256e-08	6.89171e-08
	KLHL36	16q24.1	0.211704	2.35937e-09	1.60103e-08		ARL6	3q11.2	-0.202351	1.18845e-08	7.03269e-08
	TAF11	6p21.31	0.211664	2.37637e-09	1.61134e-08		TMEM94	17q25.1	-0.202303	1.19821e-08	7.08009e-08
	AP3S1	5q22.3-q23.1	0.21166	2.37789e-09	1.61141e-08		TBC1D14	4p16.1	-0.202303	1.19822e-08	7.08009e-08
	MRPL11	11q13.2	0.211491	2.45031e-09	1.65769e-08		LINC01341	1q44	-0.202249	1.20914e-08	7.13616e-08
	ZDHHC18	1p36.11	0.211447	2.4691e-09	1.66983e-08		IPP	1p34.1	-0.202196	1.2199e-08	7.19754e-08
	MROH6	8q24.3	0.211363	2.50616e-09	1.69375e-08		CCDC148	2q24.1	-0.202165	1.22644e-08	7.23403e-08
	CYBA	16q24.2	0.211305	2.53185e-09	1.71054e-08		ATG2B	14q32.2	-0.202096	1.24078e-08	7.31431e-08
	NUPR1	16p11.2	0.211301	2.53355e-09	1.71111e-08		ATRX	Xq21.1	-0.202034	1.25373e-08	7.38629e-08
	GGT1	22q11.23	0.21127	2.54768e-09	1.71949e-08		WDR11	10q26.12	-0.201866	1.2898e-08	7.59247e-08
	CCZ1	7p22.1	0.211244	2.55932e-09	1.72619e-08		CDHR3	7q22.3	-0.201865	1.28987e-08	7.59247e-08
	SPINDOC	11q13.1	0.21124	2.56098e-09	1.72672e-08		MPPED1	22q13.2	-0.201853	1.29262e-08	7.60647e-08
	ASGR1	17p13.1	0.211234	2.5641e-09	1.72825e-08		DHRS4-AS1	14q11.2	-0.201794	1.30549e-08	7.67769e-08
	FAM136A	2p13.3	0.211218	2.57099e-09	1.73172e-08		RBKS	2p23.2	-0.201762	1.31248e-08	7.71651e-08
	CALB2	16q22.2	0.211209	2.57527e-09	1.73402e-08		CCNG1	5q34	-0.201611	1.34631e-08	7.89601e-08
	UCHL3	13q22.2	0.211205	2.57696e-09	1.73457e-08		NUBPL	14q12	-0.20161	1.34656e-08	7.89601e-08
	GLRX2	1q31.2	0.211183	2.58694e-09	1.74071e-08		IGDCC3	15q22.31	-0.201596	1.34965e-08	7.90951e-08
	CALM2	2p21	0.211171	2.59253e-09	1.74388e-08		ZFYVE28	4p16.3	-0.201588	1.35153e-08	7.91817e-08
	FAM3A	Xq28	0.211141	2.60625e-09	1.75194e-08		RELCH	18q21.33	-0.201458	1.38139e-08	8.08606e-08
	CHFR	12q24.33	0.211118	2.61674e-09	1.7584e-08		PARP3	3p21.2	-0.201454	1.38232e-08	8.08914e-08
	TTK	6q14.1	0.21103	2.6581e-09	1.78439e-08		ZFP30	19q13.12	-0.201413	1.39195e-08	8.14072e-08
	NPY4R	10q11.22	0.211007	2.66884e-09	1.79045e-08		STRN3	14q12	-0.201367	1.40259e-08	8.19813e-08
	PPP1R13L	19q13.32	0.211007	2.6689e-09	1.79045e-08		PECR	2q35	-0.201366	1.403e-08	8.19813e-08
	COL26A1	7q22.1	0.210969	2.68677e-09	1.80183e-08		DHX29	5q11.2	-0.20133	1.41144e-08	8.24027e-08
	EPO	7q22.1	0.210964	2.68909e-09	1.80278e-08		BMERB1	16p13.11	-0.201232	1.43473e-08	8.36893e-08
	NARF	17q25.3	0.210957	2.69219e-09	1.80425e-08		ANO9	11p15.5	-0.201214	1.43924e-08	8.39276e-08
	ICAM5	19p13.2	0.210935	2.70275e-09	1.81053e-08		RHBDD1	2q36.3	-0.2012	1.44243e-08	8.40891e-08
	CPNE5	6p21.2	0.210934	2.70337e-09	1.81053e-08		ZNF627	19p13.2	-0.201187	1.44575e-08	8.42582e-08
	NCF4	22q12.3	0.210923	2.7086e-09	1.81343e-08		RAB37	17q25.1	-0.201086	1.47045e-08	8.56228e-08
	SNX32	11q13.1	0.210907	2.71589e-09	1.8177e-08		CIC	19q13.2	-0.201052	1.47892e-08	8.60664e-08
	DIRC1	2q32.2	0.210842	2.74746e-09	1.8376e-08		TBK1	12q14.2	-0.200922	1.51147e-08	8.78329e-08
	SPG21	15q22.31	0.210818	2.75883e-09	1.84459e-08		BRINP2	1q25.2	-0.200892	1.51895e-08	8.82165e-08
	ORM1	9q32	0.210751	2.79158e-09	1.86525e-08		CACNA1F	Xp11.23	-0.200844	1.53127e-08	8.88546e-08
	FAM78A	9q34.13	0.210714	2.8102e-09	1.87706e-08		CEP63	3q22.2	-0.200814	1.53891e-08	8.9272e-08
	TUBA8	22q11.21	0.2107	2.81719e-09	1.88047e-08		OTUD7B	1q21.2	-0.20077	1.55037e-08	8.98848e-08
	RECQL4	8q24.3	0.210628	2.85297e-09	1.90309e-08		WDR36	5q22.1	-0.200759	1.5533e-08	9.00287e-08
	TOMM5	9p13.2	0.210606	2.864e-09	1.90981e-08		AMZ2	17q24.2	-0.200715	1.56469e-08	9.06052e-08
	DISC1	1q42.2	0.210577	2.87871e-09	1.91898e-08		FAM221A	7p15.3	-0.200684	1.57295e-08	9.10355e-08
	GSTA2	6p12.2	0.210463	2.93676e-09	1.95508e-08		KRR1	12q21.2	-0.200671	1.57632e-08	9.11777e-08
	RPL30	8q22.2	0.210461	2.93801e-09	1.95525e-08		FARP2	2q37.3	-0.200624	1.58864e-08	9.18375e-08
	GGH	8q12.3	0.210388	2.97591e-09	1.97982e-08		COASY	17q21.2	-0.200616	1.59093e-08	9.19168e-08
	GFI1	1p22.1	0.210374	2.98304e-09	1.98391e-08		THTPA	14q11.2	-0.20061	1.59232e-08	9.19706e-08
	PTDSS1	8q22.1	0.210365	2.98822e-09	1.98669e-08		UBIAD1	1p36.22	-0.200599	1.59542e-08	9.21232e-08
	MMP2	16q12.2	0.210347	2.99735e-09	1.99144e-08		NPC1L1	7p13	-0.200573	1.60239e-08	9.24988e-08
	TMED3	15q25.1	0.210133	3.11225e-09	2.06612e-08		CAMKK2	12q24.31	-0.200397	1.65029e-08	9.50722e-08
	KLHL6	3q27.1	0.210089	3.13621e-09	2.08094e-08		KMT2D	12q13.12	-0.200394	1.65096e-08	9.50833e-08
	CDC42BPG	11q13.1	0.210037	3.16522e-09	2.09879e-08		EPB41L4A-AS1	5q22.1	-0.200363	1.6596e-08	9.55537e-08
	TDP1	14q32.11	0.210018	3.17597e-09	2.10522e-08		CHD4	12p13.31	-0.200177	1.71192e-08	9.83676e-08
	CHMP1A	16q24.3	0.210014	3.17787e-09	2.10579e-08		AZI2	3p24.1	-0.200088	1.73755e-08	9.97191e-08
	SEC61B	9q22.33	0.209969	3.2029e-09	2.12167e-08		ZBTB40	1p36.12	-0.200087	1.73793e-08	9.97191e-08
	CSF2RB	22q12.3	0.209965	3.20538e-09	2.12193e-08		CFAP53	18q21.1	-0.20007	1.74287e-08	9.99456e-08
	PATL1	11q12.1	0.20996	3.20791e-09	2.12288e-08		TNNI3K	1p31.1	-0.200034	1.75332e-08	1.00516e-07
	DEGS1	1q42.11	0.209958	3.20911e-09	2.12297e-08		RNF43	17q22	-0.199976	1.77045e-08	1.01411e-07
	FNDC1	6q25.3	0.209863	3.26342e-09	2.15748e-08		ZNF782	9q22.33	-0.199959	1.77548e-08	1.01647e-07
	SIX3	2p21	0.209805	3.29657e-09	2.17615e-08		GKAP1	9q21.32	-0.19995	1.77794e-08	1.01753e-07
	MSC	8q13.3	0.209794	3.30263e-09	2.17908e-08		FKBP4	12p13.33	-0.199941	1.78083e-08	1.01889e-07
	RYR1	19q13.2	0.209752	3.32746e-09	2.19258e-08		NUP58	13q12.13	-0.199926	1.78533e-08	1.02117e-07
	RASSF5	1q32.1	0.20973	3.3403e-09	2.20031e-08		COPS2	15q21.1	-0.199921	1.78654e-08	1.02157e-07
	DMRT1	9p24.3	0.209712	3.35048e-09	2.20629e-08		MACF1	1p34.3	-0.199911	1.78963e-08	1.02305e-07
	NLRC5	16q13	0.209682	3.36817e-09	2.21721e-08		DOC2A	16p11.2	-0.199788	1.8266e-08	1.0424e-07
	LYZL4	3p22.1	0.20962	3.40488e-09	2.23917e-08		SCLY	2q37.3	-0.199714	1.84951e-08	1.05457e-07
	FAM171A1	10p13	0.209586	3.4252e-09	2.25069e-08		RIBC1	Xp11.22	-0.199697	1.85455e-08	1.05714e-07
	CLDN3	7q11.23	0.209541	3.45261e-09	2.26758e-08		LINC00894	Xq28	-0.199605	1.88313e-08	1.07309e-07
	SCNM1	1q21.3	0.209527	3.46133e-09	2.27256e-08		PURA	5q31.3	-0.199579	1.89131e-08	1.07717e-07
	NFKBIB	19q13.2	0.209504	3.47478e-09	2.28064e-08		VWA2	10q25.3	-0.19952	1.9102e-08	1.08608e-07
	DAP	5p15.2	0.209345	3.57286e-09	2.34348e-08		RUNDC3A	17q21.31	-0.199462	1.92865e-08	1.09595e-07
	CIITA	16p13.13	0.209342	3.57458e-09	2.34384e-08		FUBP3	9q34.11-q34.12	-0.199308	1.97874e-08	1.12187e-07
	URB1-AS1	21q22.11	0.209323	3.58707e-09	2.35126e-08		WDR31	9q32	-0.199241	2.00081e-08	1.13309e-07
	C19ORF12	19q12	0.209309	3.59528e-09	2.35588e-08		RSRC2	12q24.31	-0.199079	2.05548e-08	1.1634e-07
	YBX3	12p13.2	0.209305	3.59777e-09	2.35673e-08		TMEM33	4p13	-0.199007	2.08017e-08	1.17704e-07
	SFRP1	8p11.21	0.209214	3.65604e-09	2.39256e-08		AKIP1	11p15.4	-0.198921	2.11002e-08	1.19292e-07
	FAM220A	7p22.1	0.209178	3.67856e-09	2.40572e-08		IL17RB	3p21.1	-0.198883	2.12321e-08	1.20004e-07
	RNF112	17p11.2	0.209133	3.70786e-09	2.4233e-08		APBB3	5q31.3	-0.198872	2.12724e-08	1.20163e-07
	PTGIS	20q13.13	0.209117	3.71806e-09	2.42917e-08		NMT1	17q21.31	-0.198821	2.14512e-08	1.21105e-07
	PADI3	1p36.13	0.209	3.79484e-09	2.47613e-08		DHFR2	3q11.2	-0.198804	2.15134e-08	1.21422e-07
	CD163L1	12p13.31	0.208984	3.80543e-09	2.48221e-08		DNAJC27	2p23.3	-0.198799	2.15299e-08	1.21481e-07
	LMAN1L	15q24.1	0.208972	3.81336e-09	2.48657e-08		WDR90	16p13.3	-0.19878	2.15984e-08	1.21833e-07
	ASIP	20q11.22	0.208961	3.82076e-09	2.49059e-08		TBC1D9B	5q35.3	-0.198651	2.20643e-08	1.24391e-07
	SLC26A7	8q21.3	0.208952	3.82681e-09	2.49371e-08		EP400	12q24.33	-0.19863	2.21425e-08	1.24797e-07
	CD83	6p23	0.208944	3.83252e-09	2.49581e-08		BOD1	5q35.2	-0.198424	2.2911e-08	1.28874e-07
	HECTD3	1p34.1	0.208906	3.85769e-09	2.51057e-08		NSD2	4p16.3	-0.198265	2.35209e-08	1.3212e-07
	LYPD1	2q21.2	0.20888	3.87498e-09	2.521e-08		SLC44A4	6p21.33	-0.198185	2.38338e-08	1.33765e-07
	MELK	9p13.2	0.208852	3.89418e-09	2.53267e-08		PPP2CA	5q31.1	-0.198144	2.3994e-08	1.34591e-07
	ARPC4	3p25.3	0.208846	3.89813e-09	2.53442e-08		ACACB	12q24.11	-0.198144	2.39944e-08	1.34591e-07
	LOX	5q23.1	0.208796	3.93254e-09	2.55596e-08		RAB6C	2q21.1	-0.198128	2.40596e-08	1.34881e-07
	NUDT3	6p21.31	0.208685	4.00909e-09	2.60318e-08		SLC25A24	1p13.3	-0.198107	2.41439e-08	1.35278e-07
	TKT	3p21.1	0.208669	4.02065e-09	2.60984e-08		FRAT1	10q24.1	-0.19809	2.42097e-08	1.3557e-07
	CITED4	1p34.2	0.20864	4.04115e-09	2.6223e-08		ASH1L	1q22	-0.197961	2.4733e-08	1.38423e-07
	ATP11B	3q26.33	0.208633	4.04599e-09	2.62459e-08		CCNT1	12q13.11-q13.12	-0.197818	2.53243e-08	1.41574e-07
	DSC1	18q12.1	0.208511	4.13244e-09	2.67633e-08		BAIAP2	17q25.3	-0.197742	2.5642e-08	1.4323e-07
	FAM30A	14q32.33	0.20844	4.18428e-09	2.70815e-08		CLDN12	7q21.13	-0.197722	2.5728e-08	1.43671e-07
	CMPK1	1p33	0.208386	4.22363e-09	2.73274e-08		CDC27	17q21.32	-0.197697	2.58312e-08	1.44166e-07
	NPR3	5p13.3	0.208371	4.23449e-09	2.738e-08		HNF4G	8q21.13	-0.197481	2.67689e-08	1.49151e-07
	MPZL1	1q24.2	0.208332	4.26319e-09	2.75566e-08		SAXO2	15q25.2	-0.197443	2.69374e-08	1.50006e-07
	SH3GL1	19p13.3	0.208279	4.30316e-09	2.77857e-08		POLA1	Xp22.11-p21.3	-0.197409	2.70889e-08	1.50766e-07
	GPR55	2q37.1	0.208248	4.32613e-09	2.79184e-08		PTPN13	4q21.3	-0.197394	2.71567e-08	1.51059e-07
	CCDC6	10q21.2	0.20816	4.39336e-09	2.8334e-08		LINC00938	12q12	-0.197358	2.73168e-08	1.51865e-07
	LINC00426	13q12.3	0.208153	4.39864e-09	2.83589e-08		ANXA6	5q33.1	-0.197337	2.74116e-08	1.52338e-07
	KIF1C	17p13.2	0.20812	4.42328e-09	2.85086e-08		RTN2	19q13.32	-0.197336	2.7417e-08	1.52338e-07
	DDT	22q11.23	0.208095	4.44253e-09	2.86235e-08		PLA2G4D	15q15.1	-0.197332	2.74347e-08	1.52394e-07
	SLC9A2	2q12.1	0.208086	4.44953e-09	2.86501e-08		MAOA	Xp11.3	-0.197305	2.75569e-08	1.52945e-07
	FBLN1	22q13.31	0.208065	4.46586e-09	2.8746e-08		ODAD3	19p13.2	-0.1973	2.75802e-08	1.53032e-07
	NTNG2	9q34.13	0.208034	4.49063e-09	2.88869e-08		RNASE4	14q11.2	-0.197249	2.78125e-08	1.54151e-07
	AURKB	17p13.1	0.208029	4.49453e-09	2.89027e-08		NBPF15	1q21.1	-0.197234	2.78806e-08	1.54485e-07
	MYL9	20q11.23	0.208006	4.51186e-09	2.90048e-08		WFS1	4p16.1	-0.197183	2.81134e-08	1.55732e-07
	TRADD	16q22.1	0.207977	4.53529e-09	2.91441e-08		IRF2BPL	14q24.3	-0.197107	2.84685e-08	1.57612e-07
	EMP3	19q13.33	0.207975	4.53644e-09	2.91441e-08		SCRN3	2q31.1	-0.197023	2.88619e-08	1.59569e-07
	APEX2	Xp11.21	0.207959	4.5494e-09	2.92102e-08		HELZ	17q24.2	-0.196985	2.90431e-08	1.60482e-07
	SHCBP1	16q11.2	0.207958	4.54964e-09	2.92102e-08		GMPR2	14q12	-0.196926	2.93281e-08	1.61745e-07
	HOXC12	12q13.13	0.20795	4.5565e-09	2.92449e-08		OR2C1	16p13.3	-0.196919	2.9359e-08	1.61871e-07
	IGF2BP1	17q21.32	0.207831	4.65167e-09	2.9827e-08		ZBTB6	9q33.2	-0.196906	2.94211e-08	1.62168e-07
	CDCA8	1p34.3	0.207816	4.66358e-09	2.98938e-08		MEF2D	1q22	-0.196889	2.95067e-08	1.62551e-07
	TNFRSF1B	1p36.22	0.207787	4.68724e-09	3.00262e-08		PPP3CB	10q22.2	-0.196841	2.97398e-08	1.6379e-07
	TMEM51-AS1	1p36.21	0.207774	4.69745e-09	3.0082e-08		HERC1	15q22.31	-0.196836	2.97627e-08	1.63871e-07
	PRMT2	21q22.3	0.207739	4.72643e-09	3.02579e-08		DPY19L3	19q13.11	-0.196808	2.99004e-08	1.64584e-07
	LIPG	18q21.1	0.207673	4.7808e-09	3.05864e-08		SYNJ2	6q25.3	-0.19679	2.99898e-08	1.64985e-07
	C2CD4B	15q22.2	0.207613	4.83034e-09	3.08836e-08		BICRAL	6p21.1	-0.196742	3.02261e-08	1.66103e-07
	IFNGR2	21q22.11	0.207569	4.86736e-09	3.11005e-08		MAPK9	5q35.3	-0.196623	3.08212e-08	1.69234e-07
	CHEK1	11q24.2	0.207548	4.88501e-09	3.12033e-08		SPR	2p13.2	-0.196576	3.106e-08	1.70498e-07
	KXD1	19p13.11	0.207451	4.96834e-09	3.17153e-08		MKS1	17q22	-0.196571	3.1086e-08	1.70549e-07
	P4HA1	10q22.1	0.207362	5.04507e-09	3.21744e-08		TXNDC15	5q31.1	-0.196527	3.13117e-08	1.71691e-07
	DMRT3	9p24.3	0.207334	5.06992e-09	3.23225e-08		LRP2BP	4q35.1	-0.196479	3.15587e-08	1.72963e-07
	LDLRAD2	1p36.12	0.207313	5.08848e-09	3.24202e-08		SLC7A4	22q11.21	-0.196415	3.18895e-08	1.7462e-07
	PSORS1C2	6p21.33	0.207279	5.11813e-09	3.25884e-08		EXOC2	6p25.3	-0.196398	3.19764e-08	1.75e-07
	LHPP	10q26.13	0.207183	5.20429e-09	3.31265e-08		EEF2	19p13.3	-0.196387	3.20331e-08	1.75263e-07
	NINJ2	12p13.33	0.207175	5.2115e-09	3.31618e-08		DYNC1I2	2q31.1	-0.19632	3.23883e-08	1.77061e-07
	SFT2D1	6q27	0.207151	5.23266e-09	3.32754e-08		CYP4F35P	18p11.21	-0.196308	3.2454e-08	1.77372e-07
	CYCS	7p15.3	0.207075	5.30185e-09	3.37046e-08		EGOT	3p26.1	-0.196286	3.25695e-08	1.77955e-07
	YEATS2	3q27.1	0.207062	5.31384e-09	3.37701e-08		SERINC3	20q13.12	-0.196248	3.27721e-08	1.79013e-07
	HOXC8	12q13.13	0.207046	5.32865e-09	3.38535e-08		ITPK1	14q32.12	-0.196239	3.28184e-08	1.79168e-07
	UGT1A6	2q37.1	0.20702	5.35284e-09	3.39964e-08		KIF3B	20q11.21	-0.196235	3.28412e-08	1.79243e-07
	ZNF319	16q21	0.206973	5.3961e-09	3.42385e-08		DEAF1	11p15.5	-0.196179	3.31429e-08	1.80747e-07
	HLA-DRB6	6p21.32	0.206944	5.42364e-09	3.43915e-08		NOL4L	20q11.21	-0.196121	3.34617e-08	1.82431e-07
	CKM	19q13.32	0.206896	5.46866e-09	3.4655e-08		LINC00965	8p23.1	-0.196115	3.34906e-08	1.82539e-07
	SH2B2	7q22.1	0.206866	5.49726e-09	3.48142e-08		TTC23L	5p13.2	-0.196081	3.36781e-08	1.83483e-07
	POLR2J	7q22.1	0.206822	5.53867e-09	3.50654e-08		NECTIN2	19q13.32	-0.196081	3.36822e-08	1.83483e-07
	FABP5	8q21.13	0.206809	5.55133e-09	3.51345e-08		ZNF132	19q13.43	-0.196072	3.37321e-08	1.83706e-07
	DLX5	7q21.3	0.206743	5.61514e-09	3.55271e-08		FRMPD2	10q11.22	-0.196046	3.38729e-08	1.84372e-07
	NOP10	15q14	0.206731	5.62686e-09	3.55675e-08		ASCL1	12q23.2	-0.195894	3.47252e-08	1.88704e-07
	PWP2	21q22.3	0.206714	5.64316e-09	3.56593e-08		MOSPD2	Xp22.2	-0.195861	3.49111e-08	1.89662e-07
	HS3ST1	4p15.33	0.206681	5.67519e-09	3.58391e-08		ANKRD31	5q13.3	-0.195812	3.51929e-08	1.91038e-07
	USP39	2p11.2	0.206637	5.71867e-09	3.60909e-08		SERGEF	11p15.1	-0.195757	3.55104e-08	1.92604e-07
	NECTIN4	1q23.3	0.206629	5.72716e-09	3.61331e-08		FN3K	17q25.3	-0.195688	3.59126e-08	1.94575e-07
	CD96	3q13.13-q13.2	0.206596	5.75937e-09	3.63248e-08		CHRNA9	4p14	-0.195663	3.60605e-08	1.95271e-07
	MSANTD3	9q31.1	0.206564	5.79163e-09	3.65168e-08		NEO1	15q24.1	-0.195573	3.65944e-08	1.98001e-07
	POU5F1	6p21.33	0.206523	5.83233e-09	3.67619e-08		PTGR2	14q24.3	-0.195524	3.68834e-08	1.99349e-07
	CPVL	7p14.3	0.206511	5.84419e-09	3.68175e-08		NEK1	4q33	-0.195514	3.69434e-08	1.9962e-07
	SYCP1	1p13.2	0.206511	5.84483e-09	3.68175e-08		TTBK2	15q15.2	-0.195485	3.71194e-08	2.00517e-07
	CLEC4D	12p13.31	0.20642	5.9365e-09	3.73362e-08		CCDC43	17q21.31	-0.1954	3.76399e-08	2.03e-07
	AKR1B10	7q33	0.2063	6.0605e-09	3.80802e-08		RGS5	1q23.3	-0.195382	3.77502e-08	2.0354e-07
	LINC00323	21q22.2	0.206217	6.14765e-09	3.85927e-08		CELF3	1q21.3	-0.195376	3.77862e-08	2.03679e-07
	PAQR4	16p13.3	0.206217	6.14785e-09	3.85927e-08		ABHD12B	14q22.1	-0.195327	3.8089e-08	2.05201e-07
	PPA1	10q22.1	0.206134	6.23647e-09	3.91122e-08		GPALPP1	13q14.12	-0.195266	3.84673e-08	2.07016e-07
	SPRR2A	1q21.3	0.206131	6.24001e-09	3.91222e-08		WDR48	3p22.2	-0.195262	3.84926e-08	2.07097e-07
	RPIA	2p11.2	0.206117	6.25501e-09	3.92039e-08		OR2W3	1q44	-0.195257	3.85248e-08	2.07173e-07
	C20ORF27	20p13	0.206112	6.26059e-09	3.92266e-08		NHLRC2	10q25.3	-0.19523	3.86942e-08	2.08014e-07
	SPON2	4p16.3	0.206106	6.26711e-09	3.9243e-08		DCAF11	14q12	-0.195227	3.87142e-08	2.08065e-07
	CASP1	11q22.3	0.206073	6.30237e-09	3.94514e-08		PPM1A	14q23.1	-0.195213	3.8804e-08	2.08466e-07
	CARHSP1	16p13.2	0.206038	6.34088e-09	3.968e-08		NORAD	20q11.23	-0.195208	3.88321e-08	2.08531e-07
	UNC93A	6q27	0.20602	6.35963e-09	3.97809e-08		IFT74	9p21.2	-0.195181	3.90065e-08	2.09356e-07
	FOXL1	16q24.1	0.206019	6.36097e-09	3.97809e-08		LNX2	13q12.2	-0.195166	3.90983e-08	2.09792e-07
	GMFG	19q13.2	0.206001	6.38062e-09	3.98913e-08		SARAF	8p12	-0.19506	3.97762e-08	2.13258e-07
	IRAK1	Xq28	0.205985	6.39845e-09	3.99732e-08		CST2	20p11.21	-0.19504	3.99073e-08	2.13904e-07
	CD244	1q23.3	0.205984	6.39971e-09	3.99732e-08		USP38	4q31.21	-0.195	4.01661e-08	2.15175e-07
	H2AX	11q23.3	0.205972	6.41281e-09	4.00426e-08		UMOD	16p12.3	-0.194901	4.08183e-08	2.18611e-07
	CHRNE	17p13.2	0.20595	6.43691e-09	4.0168e-08		AFAP1L2	10q25.3	-0.194841	4.12175e-08	2.20572e-07
	ACP3	3q22.1	0.205939	6.44894e-09	4.02305e-08		DTWD1	15q21.2	-0.194825	4.13242e-08	2.20966e-07
	UQCRFS1	19q12	0.205837	6.56332e-09	4.09059e-08		EDA2R	Xq12	-0.194799	4.14992e-08	2.21842e-07
	HTR3A	11q23.2	0.20583	6.57071e-09	4.09264e-08		CPEB3	10q23.32	-0.194742	4.18885e-08	2.23744e-07
	DMRTA2	1p32.3	0.20576	6.65047e-09	4.13614e-08		TPTE2P3	13q14.3	-0.194666	4.24052e-08	2.26142e-07
	PLSCR3	17p13.1	0.20576	6.65088e-09	4.13614e-08		WHAMMP3	15q11.2	-0.194584	4.29776e-08	2.28951e-07
	CHRAC1	8q24.3	0.205719	6.69753e-09	4.16386e-08		CALHM1	10q24.33	-0.194537	4.33036e-08	2.30504e-07
	PACC1	1q32.3	0.205702	6.71739e-09	4.17492e-08		ZNF234	19q13.31	-0.194519	4.34344e-08	2.31139e-07
	PRDM1	6q21	0.205692	6.72901e-09	4.18084e-08		NFIC	19p13.3	-0.194451	4.39137e-08	2.33627e-07
	ERGIC2	12p11.22	0.205676	6.74684e-09	4.19062e-08		PYROXD1	12p12.1	-0.194438	4.4006e-08	2.34056e-07
	CRYBG3	3q11.2	0.205661	6.76425e-09	4.19882e-08		AHSA2P	2p15	-0.194328	4.47946e-08	2.3804e-07
	TMEM208	16q22.1	0.205598	6.83889e-09	4.24253e-08		FAM169A	5q13.3	-0.194286	4.51031e-08	2.39573e-07
	HPD	12q24.31	0.205525	6.92416e-09	4.29144e-08		RHOT1	17q11.2	-0.194261	4.52881e-08	2.40491e-07
	CD3E	11q23.3	0.205499	6.95545e-09	4.30816e-08		CLK1	2q33.1	-0.194093	4.65338e-08	2.46584e-07
	KCTD15	19q13.11	0.205484	6.97348e-09	4.31705e-08		SENP7	3q12.3	-0.194001	4.72288e-08	2.50134e-07
	RANBP1	22q11.21	0.205452	7.01209e-09	4.33788e-08		LCORL	4p15.31	-0.194	4.7242e-08	2.50138e-07
	NDUFA6	22q13.2	0.205416	7.0546e-09	4.36013e-08		IMPG1	6q14.1	-0.193899	4.80147e-08	2.54095e-07
	TGM5	15q15.2	0.205407	7.0659e-09	4.36577e-08		AQP11	11q14.1	-0.193825	4.85914e-08	2.57011e-07
	ODAPH	4q21.1	0.205332	7.15745e-09	4.42097e-08		OR6B3	2q37.3	-0.193806	4.87454e-08	2.57757e-07
	GINS1	20p11.21	0.205304	7.19151e-09	4.44064e-08		IK	5q31.3	-0.193762	4.90883e-08	2.59369e-07
	GBP2	1p22.2	0.205242	7.26837e-09	4.48533e-08		HEXIM2	17q21.31	-0.193628	5.01653e-08	2.64776e-07
	BBLN	9q34.11	0.205239	7.27208e-09	4.48624e-08		BCDIN3D-AS1	12q13.12	-0.193571	5.0627e-08	2.67142e-07
	TEX30	13q33.1	0.205227	7.28744e-09	4.49433e-08		SCUBE1	22q13.2	-0.193441	5.16968e-08	2.72429e-07
	SLC25A53	Xq22.2	0.205176	7.35156e-09	4.53109e-08		WNK4	17q21.2	-0.19339	5.21229e-08	2.74258e-07
	PPP3R1	2p14	0.205144	7.39157e-09	4.55434e-08		ZSCAN2	15q25.2	-0.193374	5.22603e-08	2.74892e-07
	STAG3	7q22.1	0.205141	7.39562e-09	4.55544e-08		METTL16	17p13.3	-0.193346	5.25018e-08	2.76017e-07
	NDUFB2	7q34	0.205135	7.40268e-09	4.55839e-08		C12ORF60	12p12.3	-0.19331	5.28049e-08	2.77538e-07
	KLK9	19q13.41	0.205032	7.53432e-09	4.63517e-08		TCP11L2	12q23.3	-0.193282	5.30427e-08	2.78714e-07
	COL11A2	6p21.32	0.204957	7.63164e-09	4.68928e-08		SORBS3	8p21.3	-0.193182	5.3906e-08	2.82953e-07
	CLDN1	3q28	0.204929	7.66875e-09	4.71064e-08		PBX1	1q23.3	-0.193144	5.42306e-08	2.84508e-07
	POM121L9P	22q11.23	0.204851	7.77228e-09	4.76984e-08		RAB28	4p15.33	-0.193133	5.43322e-08	2.84967e-07
	PLA2G4E	15q15.1	0.204739	7.92174e-09	4.85412e-08		SPTY2D1	11p15.1	-0.193109	5.45436e-08	2.85854e-07
	CHD7	8q12.2	0.204734	7.92841e-09	4.85672e-08		CLK4	5q35.3	-0.192978	5.5705e-08	2.91785e-07
	CD28	2q33.2	0.204713	7.95789e-09	4.8718e-08		NFU1	2p13.3	-0.192955	5.59055e-08	2.92758e-07
	ATP5F1C	10p14	0.204702	7.97215e-09	4.87904e-08		FAM66A	8p23.1	-0.192846	5.6893e-08	2.97385e-07
	SEL1L3	4p15.2	0.204639	8.05872e-09	4.92751e-08		RRM1	11p15.4	-0.192804	5.72817e-08	2.99248e-07
	E2F2	1p36.12	0.204598	8.11489e-09	4.95883e-08		MOB1B	4q13.3	-0.192738	5.78912e-08	3.02051e-07
	LILRB2	19q13.4	0.204596	8.11812e-09	4.95928e-08		COX11	17q22	-0.192694	5.82979e-08	3.03856e-07
	KCNK12	2p16.3	0.204572	8.15146e-09	4.97813e-08		FBXL21P	5q31.1	-0.192666	5.85667e-08	3.05178e-07
	EIF5B	2q11.2	0.204549	8.18375e-09	4.99633e-08		LIFR	5p13.1	-0.192663	5.85945e-08	3.05243e-07
	SLC39A1	1q21.3	0.204462	8.30641e-09	5.06504e-08		ZNF429	19p12	-0.192608	5.91126e-08	3.07782e-07
	GPM6B	Xp22.2	0.204408	8.38188e-09	5.10484e-08		HNRNPK	9q21.32	-0.192589	5.92971e-08	3.08662e-07
	CXCR3	Xq13.1	0.204405	8.38684e-09	5.10631e-08		ABCA2	9q34.3	-0.192567	5.95007e-08	3.09481e-07
	KPNA4	3q25.33	0.204385	8.41539e-09	5.12213e-08		MGAT4A	2q11.2	-0.192537	5.97875e-08	3.10892e-07
	MAP3K6	1p36.11	0.204377	8.42698e-09	5.12763e-08		POGZ	1q21.3	-0.192534	5.98209e-08	3.10985e-07
	PHF5A	22q13.2	0.204341	8.47867e-09	5.15751e-08		ZNF720	16p11.2	-0.192318	6.19282e-08	3.21189e-07
	SHARPIN	8q24.3	0.204327	8.49924e-09	5.16846e-08		SRSF6	20q13.11	-0.192149	6.36319e-08	3.29173e-07
	TBX19	1q24.2	0.204305	8.53058e-09	5.18279e-08		ZNF747	16p11.2	-0.19213	6.38212e-08	3.30067e-07
	LCAT	16q22.1	0.204283	8.56287e-09	5.20083e-08		OSGEPL1	2q32.2	-0.192097	6.41547e-08	3.31706e-07
	DEPDC7	11p13	0.20427	8.58257e-09	5.21122e-08		SNAPC2	19p13.2	-0.19206	6.45423e-08	3.33538e-07
	ZC3H12D	6q25.1	0.204224	8.65043e-09	5.24924e-08		CCPG1	15q21.3	-0.192047	6.46713e-08	3.34118e-07
	TNFSF15	9q32	0.204204	8.67938e-09	5.26521e-08		RNF111	15q22.1-q22.2	-0.191997	6.51917e-08	3.3672e-07
	ZBP1	20q13.31	0.204194	8.69392e-09	5.27243e-08		PDE11A	2q31.2	-0.191881	6.64115e-08	3.42579e-07
	CORO1A	16p11.2	0.204117	8.80955e-09	5.33888e-08		ANKRD30A	10p11.21	-0.191874	6.64848e-08	3.42869e-07
	CD48	1q23.3	0.204113	8.8149e-09	5.33933e-08		ENOSF1	18p11.32	-0.191823	6.70278e-08	3.45491e-07
	HSD11B1	1q32.2	0.204079	8.86536e-09	5.36828e-08		ARFIP1	4q31.3	-0.191591	6.95673e-08	3.57568e-07
	TGFB2	1q41	0.204038	8.92837e-09	5.40316e-08		ZNF142	2q35	-0.191572	6.97708e-08	3.5843e-07
	SLAMF6	1q23.2-q23.3	0.204009	8.97222e-09	5.42642e-08		ELAPOR1	1p13.3	-0.191549	7.00293e-08	3.5948e-07
	BTLA	3q13.2	0.203985	9.00962e-09	5.44739e-08		PCDH1	5q31.3	-0.191461	7.10276e-08	3.63891e-07
	ARSF	Xp22.33	0.203801	9.29544e-09	5.61342e-08		DCX	Xq23	-0.19146	7.10338e-08	3.63891e-07
	NUS1	6q22.1	0.203799	9.29927e-09	5.61405e-08		RASSF8	12p12.1	-0.191457	7.10685e-08	3.63976e-07
	CTSV	9q22.33	0.203787	9.31743e-09	5.62331e-08		PDPK1	16p13.3	-0.19143	7.13794e-08	3.65475e-07
	TRAM2	6p12.2	0.203783	9.32481e-09	5.62607e-08		IQCD	12q24.13	-0.191414	7.15541e-08	3.66276e-07
	NT5E	6q14.3	0.203694	9.46679e-09	5.70612e-08		KCTD18	2q33.1	-0.191399	7.1726e-08	3.66968e-07
	BUD31	7q22.1	0.203692	9.46888e-09	5.70612e-08		DENND4A	15q22.31	-0.191277	7.31348e-08	3.73889e-07
	CLEC4C	12p13.31	0.203682	9.48604e-09	5.71474e-08		KIF13B	8p12	-0.19127	7.3218e-08	3.74219e-07
	BANK1	4q24	0.203663	9.51634e-09	5.72954e-08		POTEC	18p11.21	-0.19125	7.34532e-08	3.7523e-07
	DOK5	20q13.2	0.203615	9.59453e-09	5.77489e-08		FGFR3	4p16.3	-0.1912	7.4035e-08	3.78009e-07
	NDUFB2-AS1	7q34	0.20359	9.63466e-09	5.79381e-08		PRMT9	4q31.23	-0.191133	7.48383e-08	3.81916e-07
	TATDN1	8q24.13	0.20354	9.71674e-09	5.83967e-08		GPBP1	5q11.2	-0.190991	7.65421e-08	3.90014e-07
	TRIM16	17p12	0.203517	9.75546e-09	5.85942e-08		CSNK1D	17q25.3	-0.190972	7.67763e-08	3.91108e-07
	CXCL16	17p13.2	0.203505	9.77582e-09	5.86989e-08		PLA2G6	22q13.1	-0.190861	7.81474e-08	3.97688e-07
	CPSF3	2p25.1	0.203492	9.79637e-09	5.8787e-08		SUCLA2	13q14.2	-0.190808	7.88016e-08	4.00407e-07
	TMEM70	8q21.11	0.203463	9.84439e-09	5.90575e-08		SP1	12q13.13	-0.190786	7.90799e-08	4.01718e-07
	NOPCHAP1	12q23.3	0.203462	9.84763e-09	5.90592e-08		RPS6KB1	17q23.1	-0.190688	8.03242e-08	4.0742e-07
	NRGN	11q24.2	0.203429	9.90216e-09	5.93152e-08		HID1	17q25.1	-0.190505	8.26891e-08	4.1899e-07
	TCL1A	14q32.13	0.203386	9.97459e-09	5.97312e-08		SFXN2	10q24.32	-0.190479	8.30295e-08	4.20608e-07
	PML	15q24.1	0.203383	9.97928e-09	5.97414e-08		FAM95B1	9p11.2	-0.190452	8.33847e-08	4.22301e-07
	RAD51B	14q24.1	0.203365	1.00107e-08	5.98838e-08		ABR	17p13.3	-0.190444	8.35022e-08	4.22683e-07
	AATBC	21q22.3	0.203255	1.0198e-08	6.09597e-08		ERLIN2	8p11.23	-0.190431	8.36694e-08	4.23422e-07
	COX4I1	16q24.1	0.203249	1.02099e-08	6.10128e-08		ALDH6A1	14q24.3	-0.190418	8.38398e-08	4.23962e-07
	DCAF13	8q22.3	0.203067	1.05286e-08	6.28044e-08		USP36	17q25.3	-0.190341	8.48732e-08	4.28972e-07
	GALT	9p13.3	0.202964	1.07148e-08	6.3839e-08		ATF7	12q13.13	-0.190254	8.6044e-08	4.34451e-07
	SLA2	20q11.23	0.202957	1.07271e-08	6.38937e-08		COPZ1	12q13.13	-0.190095	8.82425e-08	4.45102e-07
	NTSR1	20q13.33	0.202931	1.07751e-08	6.41602e-08		KIF5A	12q13.3	-0.19009	8.83141e-08	4.45127e-07
	MOSPD3	7q22.1	0.202885	1.08585e-08	6.4638e-08		YAF2	12q12	-0.19008	8.8454e-08	4.4572e-07
	TNFRSF17	16p13.13	0.20286	1.09056e-08	6.4899e-08		ANKHD1	5q31.3	-0.189969	9.00189e-08	4.53491e-07
	TNFRSF13C	22q13.2	0.202857	1.09111e-08	6.49123e-08		B4GALNT4	11p15.5	-0.189907	9.09145e-08	4.57773e-07
	CRISP2	6p12.3	0.202812	1.09943e-08	6.53881e-08		DCP2	5q22.2	-0.189887	9.1193e-08	4.5906e-07
	IFI16	1q23.1	0.202727	1.11535e-08	6.63151e-08		TECTA	11q23.3	-0.189883	9.12567e-08	4.59265e-07
	PCBP4	3p21.2	0.202592	1.14111e-08	6.77661e-08		TBC1D17	19q13.33	-0.189862	9.15669e-08	4.6071e-07
	CTRL	16q22.1	0.202572	1.14482e-08	6.79661e-08		SLC25A35	17p13.1	-0.189828	9.20557e-08	4.62821e-07
	SNRPC	6p21.31	0.202556	1.14792e-08	6.81299e-08		BRDT	1p22.1	-0.189811	9.23036e-08	4.63951e-07
	TREML2	6p21.1	0.202541	1.15084e-08	6.82725e-08		PGR	11q22.1	-0.189738	9.33705e-08	4.6886e-07
	NIP7	16q22.1	0.202541	1.151e-08	6.82725e-08		KBTBD7	13q14.11	-0.189718	9.36753e-08	4.70137e-07
	ARL4A	7p21.3	0.202502	1.15858e-08	6.87017e-08		CCDC66	3p14.3	-0.189627	9.50277e-08	4.76686e-07
	RLN3	19p13.12	0.202455	1.16781e-08	6.92083e-08		ZNF337	20p11.21	-0.189555	9.61062e-08	4.81975e-07
	CTSW	11q13.1	0.202414	1.17582e-08	6.96621e-08		BTBD8	1p22.1	-0.189534	9.6435e-08	4.83503e-07
	LINC02872	9q21.33	0.202386	1.18149e-08	6.99774e-08		HDAC7	12q13.11	-0.18936	9.9115e-08	4.95946e-07
	UBE2C	20q13.12	0.202375	1.18362e-08	7.00825e-08		ATF2	2q31.1	-0.18934	9.94296e-08	4.97148e-07
	ATG5	6q21	0.202354	1.18778e-08	7.03081e-08		HMGCLL1	6p12.1	-0.189267	1.00586e-07	5.02304e-07
	ARHGAP25	2p13.3	0.202331	1.19246e-08	7.05433e-08		ZBTB41	1q31.3	-0.189216	1.0139e-07	5.06064e-07
	RASGEF1C	5q35.3	0.202326	1.19358e-08	7.05891e-08		RFK	9q21.13	-0.189208	1.01518e-07	5.06578e-07
	POU4F1	13q31.1	0.202316	1.19548e-08	7.06807e-08		CTBP1-DT	4p16.3	-0.189126	1.0285e-07	5.1297e-07
	YES1	18p11.32	0.202295	1.19974e-08	7.08694e-08		HPN-AS1	19q13.11-q13.12	-0.189106	1.03164e-07	5.14281e-07
	TMPRSS15	21q21.1	0.202292	1.20029e-08	7.08813e-08		ZNF84	12q24.33	-0.188974	1.05336e-07	5.24366e-07
	PNP	14q11.2	0.202252	1.20856e-08	7.13485e-08		ZNF19	16q22.2	-0.188934	1.05997e-07	5.27484e-07
	DPAGT1	11q23.3	0.202118	1.23612e-08	7.28897e-08		ARHGAP35	19q13.32	-0.18889	1.0674e-07	5.30786e-07
	CCL4	17q12	0.202069	1.24639e-08	7.34521e-08		SNRPN	15q11.2	-0.188836	1.0765e-07	5.34644e-07
	CCN1	1p22.3	0.202014	1.25795e-08	7.40898e-08		PPP6C	9q33.3	-0.188759	1.08956e-07	5.40527e-07
	RALA	7p14.1	0.2018	1.30419e-08	7.67227e-08		SLC22A18	11p15.4	-0.188732	1.09414e-07	5.426e-07
	DDX39A	19p13.12	0.20175	1.3152e-08	7.72881e-08		CDC14A	1p21.2	-0.188573	1.12188e-07	5.55942e-07
	TOM1	22q12.3	0.201749	1.31535e-08	7.72881e-08		LIAS	4p14	-0.188538	1.12815e-07	5.58415e-07
	GRAP2	22q13.1	0.201643	1.33909e-08	7.86569e-08		DIS3L2	2q37.1	-0.188537	1.12826e-07	5.58415e-07
	MAL2	8q24.12	0.201641	1.33943e-08	7.86569e-08		CHCHD5	2q14.1	-0.188532	1.1291e-07	5.58552e-07
	FRMPD4	Xp22.2	0.201631	1.34175e-08	7.87704e-08		STAT5B	17q21.2	-0.188512	1.13274e-07	5.60077e-07
	PDCD1	2q37.3	0.201619	1.34439e-08	7.89021e-08		COL4A5	Xq22.3	-0.188449	1.14392e-07	5.65188e-07
	KIAA2013	1p36.22	0.20161	1.34647e-08	7.89601e-08		CRACDL	2q11.2	-0.188411	1.1509e-07	5.68354e-07
	CLTA	9p13.3	0.201601	1.34851e-08	7.90514e-08		SLC35D2	9q22.32	-0.188409	1.15121e-07	5.68367e-07
	PIK3R6	17p13.1	0.201554	1.35915e-08	7.96053e-08		UHRF1BP1L	12q23.1	-0.188378	1.15676e-07	5.70968e-07
	FMO3	1q24.3	0.201476	1.37725e-08	8.06415e-08		SLC26A11	17q25.3	-0.188247	1.18072e-07	5.82218e-07
	SERPINF1	17p13.3	0.201438	1.38611e-08	8.10894e-08		RSBN1	1p13.2	-0.188216	1.18663e-07	5.84992e-07
	UNC93B1	11q13.2	0.201367	1.40264e-08	8.19813e-08		KRT8P41	11p15.4	-0.188069	1.21418e-07	5.98278e-07
	SLAMF1	1q23.3	0.20136	1.40434e-08	8.2036e-08		WFDC2	20q13.12	-0.188058	1.21629e-07	5.99133e-07
	LINC00310	21q22.11	0.201343	1.40828e-08	8.22423e-08		SERINC4	15q15.3	-0.188053	1.2173e-07	5.99226e-07
	TWF2	3p21.2	0.201326	1.41242e-08	8.24359e-08		ZNF678	1q42.13	-0.18797	1.23309e-07	6.06706e-07
	CCR1	3p21.31	0.20132	1.41384e-08	8.24944e-08		LRTOMT	11q13.4	-0.187934	1.24012e-07	6.09857e-07
	NPL	1q25.3	0.2011	1.46684e-08	8.54627e-08		PAXIP1	7q36.2	-0.18793	1.24084e-07	6.10063e-07
	AQP5	12q13.12	0.201096	1.46796e-08	8.55031e-08		GLIDR	9p12	-0.187923	1.24224e-07	6.10601e-07
	RNF144B	6p22.3	0.201074	1.47338e-08	8.57689e-08		AKR7L	1p36.13	-0.187877	1.25135e-07	6.14926e-07
	ZNF438	10p11.23	0.201049	1.47963e-08	8.60822e-08		ZER1	9q34.11	-0.187769	1.2726e-07	6.24755e-07
	RHOG	11p15.4	0.201046	1.4804e-08	8.61024e-08		KHNYN	14q12	-0.187709	1.28469e-07	6.29765e-07
	CD80	3q13.33	0.201033	1.48355e-08	8.62602e-08		RHOB	2p24.1	-0.187498	1.32776e-07	6.49924e-07
	TRMT61A	14q32.33	0.200941	1.50658e-08	8.75742e-08		CPLANE1	5p13.2	-0.187494	1.32858e-07	6.50008e-07
	IDI2-AS1	10p15.3	0.200895	1.51821e-08	8.81988e-08		SYNJ2BP	14q24.2	-0.187494	1.32858e-07	6.50008e-07
	ICAM3	19p13.2	0.200888	1.52013e-08	8.82594e-08		NOCT	4q31.1	-0.187481	1.33111e-07	6.51087e-07
	GABRQ	Xq28	0.200876	1.52316e-08	8.84093e-08		MPI	15q24.1	-0.187475	1.33253e-07	6.51623e-07
	IFNG	12q15	0.200808	1.54047e-08	8.93364e-08		STAT6	12q13.3	-0.187455	1.33666e-07	6.53324e-07
	SCGB2A1	11q12.3	0.200745	1.55677e-08	9.02032e-08		ARRB1	11q13.4	-0.187426	1.34268e-07	6.55626e-07
	PSPH	7p11.2	0.200735	1.55939e-08	9.03291e-08		AIMP1	4q24	-0.187411	1.34591e-07	6.5696e-07
	PIK3AP1	10q24.1	0.200714	1.56506e-08	9.06052e-08		STXBP2	19p13.2	-0.187371	1.35427e-07	6.60641e-07
	TWIST2	2q37.3	0.200678	1.57435e-08	9.10905e-08		CPD	17q11.2	-0.187341	1.36066e-07	6.63598e-07
	E2F4	16q22.1	0.200665	1.5779e-08	9.12429e-08		JKAMP	14q23.1	-0.187284	1.37268e-07	6.68804e-07
	SGMS2	4q25	0.200617	1.59054e-08	9.19168e-08		CERS4	19p13.2	-0.187196	1.39173e-07	6.77756e-07
	TRPV2	17p11.2	0.200529	1.61406e-08	9.31454e-08		DDR1	6p21.33	-0.18719	1.39297e-07	6.78199e-07
	SNRPA1	15q26.3	0.200525	1.61532e-08	9.31913e-08		ZNF853	7p22.1	-0.187161	1.39927e-07	6.80932e-07
	TBC1D24	16p13.3	0.200522	1.61596e-08	9.32013e-08		M1AP	2p13.1	-0.187101	1.41256e-07	6.86898e-07
	S100P	4p16.1	0.200489	1.62498e-08	9.36947e-08		PHRF1	11p15.5	-0.187066	1.42018e-07	6.89933e-07
	CD5	11q12.2	0.200422	1.64338e-08	9.47283e-08		DCTN6	8p12	-0.186992	1.43662e-07	6.97583e-07
	ALAS1	3p21.2	0.200419	1.64421e-08	9.47488e-08		NTRK2	9q21.33	-0.186987	1.43781e-07	6.97992e-07
	ATP2B3	Xq28	0.200352	1.66276e-08	9.57079e-08		IGFBP4	17q21.2	-0.186884	1.46113e-07	7.08623e-07
	AKR1B1	7q33	0.200245	1.69267e-08	9.74017e-08		DTWD2	5q23.1	-0.186675	1.50932e-07	7.30933e-07
	CAPN3	15q15.1	0.200235	1.69542e-08	9.75318e-08		TCF12	15q21.3	-0.186657	1.51368e-07	7.3287e-07
	H2AC12	6p22.1	0.200214	1.7014e-08	9.78475e-08		CDS1	4q21.23	-0.186622	1.52177e-07	7.3643e-07
	GPR25	1q32.1	0.200184	1.71009e-08	9.83189e-08		LFNG	7p22.3	-0.186595	1.52813e-07	7.38795e-07
	HOXD11	2q31.1	0.200181	1.71095e-08	9.83406e-08		FGF7P3	9p12	-0.18654	1.5414e-07	7.44671e-07
	PRAME	22q11.22	0.200166	1.71519e-08	9.85274e-08		TUSC3	8p22	-0.186535	1.54258e-07	7.45061e-07
	MAP7D1	1p34.3	0.200157	1.71777e-08	9.86471e-08		LPGAT1	1q32.3	-0.186485	1.55456e-07	7.50666e-07
	SLC39A12	10p12.33	0.200094	1.73597e-08	9.9664e-08		LRRC57	15q15.2	-0.186483	1.55513e-07	7.50761e-07
	KRT15	17q21.2	0.200081	1.73967e-08	9.97907e-08		FXR2	17p13.1	-0.186461	1.56033e-07	7.52727e-07
	FAM89B	11q13.1	0.200027	1.75536e-08	1.00604e-07		PCGF3	4p16.3	-0.186389	1.57782e-07	7.60794e-07
	FMO6P	1q24.3	0.199977	1.76998e-08	1.01411e-07		DDX5	17q23.3	-0.186381	1.57991e-07	7.61437e-07
	FKBPL	6p21.32	0.199958	1.77559e-08	1.01647e-07		ARHGEF12	11q23.3	-0.186376	1.58115e-07	7.61853e-07
	COL6A5	3q22.1	0.199905	1.79155e-08	1.02385e-07		RXYLT1	12q14.2	-0.186264	1.60876e-07	7.74038e-07
	ROPN1	3q21.1	0.199901	1.79255e-08	1.02413e-07		ZDHHC11	5p15.33	-0.18625	1.61233e-07	7.75196e-07
	LITAF	16p13.13	0.19986	1.805e-08	1.03095e-07		SULT1A1	16p11.2	-0.186187	1.62829e-07	7.82682e-07
	HRK	12q24.22	0.199838	1.81153e-08	1.03439e-07		RBM18	9q33.2	-0.186167	1.63335e-07	7.84736e-07
	SMOC1	14q24.1	0.199798	1.82367e-08	1.04102e-07		VSIG10	12q24.23	-0.186079	1.65566e-07	7.94881e-07
	ANKRD45	1q25.1	0.19975	1.83838e-08	1.04882e-07		BAG4	8p11.23	-0.186019	1.67105e-07	8.01887e-07
	CSK	15q24.1	0.199727	1.84532e-08	1.05248e-07		SUZ12	17q11.2	-0.185867	1.71087e-07	8.20605e-07
	VRTN	14q24.3	0.199604	1.8836e-08	1.07309e-07		XIAP	Xq25	-0.18582	1.72347e-07	8.26251e-07
	C1ORF105	1q24.3	0.199568	1.89498e-08	1.07896e-07		C6ORF201	6p25.2	-0.185785	1.7328e-07	8.30129e-07
	CDH26	20q13.33	0.199543	1.90275e-08	1.08307e-07		KRT35	17q21.2	-0.185763	1.73872e-07	8.32579e-07
	UBASH3A	21q22.3	0.199539	1.90418e-08	1.08358e-07		CASD1	7q21.3	-0.185759	1.73965e-07	8.3281e-07
	ERN2	16p12.2	0.199534	1.90563e-08	1.0841e-07		LINC02035	3q21.1	-0.185662	1.76597e-07	8.44604e-07
	C20ORF141	20p13	0.19953	1.90681e-08	1.08446e-07		BMS1P4	10q22.2	-0.185651	1.76897e-07	8.45835e-07
	GTPBP4	10p15.3	0.199482	1.9222e-08	1.09259e-07		ALMS1P1	2p13.1	-0.18561	1.78046e-07	8.50721e-07
	EIF3K	19q13.2	0.199449	1.93263e-08	1.0979e-07		NEK5	13q14.3	-0.185597	1.784e-07	8.52004e-07
	SLC25A1	22q11.21	0.199409	1.94569e-08	1.105e-07		ARID4B	1q42.3	-0.185555	1.79559e-07	8.56927e-07
	BMP6	6p24.3	0.199404	1.94718e-08	1.10554e-07		STOX1	10q22.1	-0.18553	1.80235e-07	8.59335e-07
	NCK1	3q22.3	0.199396	1.94994e-08	1.10665e-07		PSD4	2q14.1	-0.185511	1.80787e-07	8.61576e-07
	SKA3	13q12.11	0.199395	1.95024e-08	1.10665e-07		PLEKHA3	2q31.2	-0.18549	1.81377e-07	8.63955e-07
	RGS19	20q13.33	0.199366	1.95958e-08	1.11163e-07		KTN1	14q22.1	-0.185487	1.81446e-07	8.64079e-07
	TBC1D22B	6p21.2	0.199315	1.9762e-08	1.12074e-07		SHPK	17p13.2	-0.185471	1.81905e-07	8.65852e-07
	TREX2	Xq28	0.199263	1.99334e-08	1.12959e-07		FAM177A1	14q13.2	-0.185457	1.82294e-07	8.67499e-07
	MRPL39	21q21.3	0.199262	1.99377e-08	1.12959e-07		AKAP5	14q23.3	-0.185422	1.8329e-07	8.71826e-07
	SIM2	21q22.13	0.199261	1.99405e-08	1.12959e-07		GPD1L	3p22.3	-0.185403	1.83812e-07	8.74099e-07
	PLK1	16p12.2	0.199108	2.04561e-08	1.15814e-07		HMGXB3	5q32	-0.185286	1.8718e-07	8.89273e-07
	TRPM2	21q22.3	0.198953	2.09862e-08	1.18715e-07		H2AP	Xp11.4	-0.185274	1.87524e-07	8.90485e-07
	GAPDH	12p13.31	0.198921	2.11001e-08	1.19292e-07		SNORD116-4	15q11.2	-0.18517	1.90543e-07	9.03963e-07
	VRK1	14q32.2	0.19888	2.12418e-08	1.20025e-07		TTC5	14q11.2	-0.185144	1.91301e-07	9.07345e-07
	PTMA	2q37.1	0.198845	2.13661e-08	1.20659e-07		RBM5	3p21.31	-0.185134	1.91622e-07	9.08434e-07
	CXCL9	4q21.1	0.198744	2.17278e-08	1.22529e-07		RPTOR	17q25.3	-0.185074	1.93405e-07	9.16454e-07
	TAP2	6p21.32	0.198616	2.21935e-08	1.25049e-07		GNB5	15q21.2	-0.184979	1.96244e-07	9.29026e-07
	CCL28	5p12	0.198586	2.23056e-08	1.25645e-07		PAIP2	5q31.2	-0.184947	1.97207e-07	9.32926e-07
	CNPY4	7q22.1	0.198572	2.23563e-08	1.25896e-07		KEAP1	19p13.2	-0.184925	1.97897e-07	9.35967e-07
	TRMU	22q13.31	0.198458	2.27831e-08	1.28263e-07		NELL2	12q12	-0.18481	2.01429e-07	9.51098e-07
	DGAT2	11q13.5	0.198435	2.28687e-08	1.28709e-07		SKINT1L	1p33	-0.184784	2.02221e-07	9.54387e-07
	HOXB13	17q21.32	0.19843	2.28863e-08	1.28772e-07		CHD8	14q11.2	-0.184741	2.03575e-07	9.60327e-07
	PKMYT1	16p13.3	0.198406	2.29772e-08	1.2921e-07		EPS15L1	19p13.11	-0.184684	2.05371e-07	9.68114e-07
	PARL	3q27.1	0.198393	2.30293e-08	1.29467e-07		TOLLIP	11p15.5	-0.184636	2.06872e-07	9.74272e-07
	SLAMF9	1q23.2	0.198389	2.3045e-08	1.29519e-07		ADAP1	7p22.3	-0.184491	2.11531e-07	9.95749e-07
	KRTAP1-1	17q21.2	0.198386	2.30534e-08	1.2953e-07		ANKRD20A8P	2q11.1	-0.184384	2.15065e-07	1.01191e-06
	OTX1	2p15	0.198263	2.35283e-08	1.32124e-07		ITIH6	Xp11.22	-0.184307	2.17615e-07	1.02222e-06
	ARHGEF39	9p13.3	0.198197	2.37876e-08	1.33543e-07		UBR3	2q31.1	-0.184222	2.20478e-07	1.03443e-06
	CD53	1p13.3	0.198128	2.40589e-08	1.34881e-07		THSD1P1	13q14.3	-0.184172	2.22176e-07	1.04194e-06
	CHPF2	7q36.1	0.198124	2.40735e-08	1.3492e-07		ANKEF1	20p12.2	-0.184148	2.22973e-07	1.04519e-06
	LINC01096	4p15.33	0.198096	2.41864e-08	1.35478e-07		DNAJC7	17q21.2	-0.184105	2.24463e-07	1.05168e-06
	CTSS	1q21.3	0.198002	2.45642e-08	1.37517e-07		RAB11A	15q22.31	-0.183987	2.28553e-07	1.06984e-06
	TENT4A	5p15.31	0.197911	2.49368e-08	1.39525e-07		FAM204A	10q26.11	-0.183939	2.30253e-07	1.0768e-06
	NCF1C	7q11.23	0.197834	2.52542e-08	1.41261e-07		ALMS1	2p13.1	-0.183939	2.30255e-07	1.0768e-06
	CLDN16	3q28	0.197831	2.52698e-08	1.41309e-07		TAOK2	16p11.2	-0.183922	2.30845e-07	1.07931e-06
	PFDN2	1q23.3	0.197812	2.53479e-08	1.41666e-07		FUBP1	1p31.1	-0.183903	2.31513e-07	1.08218e-06
	PRSS33	16p13.3	0.197801	2.53953e-08	1.41892e-07		IGIP	5q31.3	-0.183847	2.33495e-07	1.09093e-06
	FAM126A	7p15.3	0.197711	2.57735e-08	1.43884e-07		ASB16-AS1	17q21.31	-0.183745	2.37176e-07	1.10632e-06
	RCSD1	1q24.2	0.197688	2.58708e-08	1.44347e-07		SPATA6	1p33	-0.183703	2.38705e-07	1.11294e-06
	CA5BP1	Xp22.2	0.19767	2.59482e-08	1.44739e-07		CCDC34	11p14.1	-0.183621	2.41723e-07	1.12648e-06
	PDE4B	1p31.3	0.197616	2.61811e-08	1.45997e-07		TMED8	14q24.3	-0.183494	2.46453e-07	1.14799e-06
	PLEKHM2	1p36.21	0.197566	2.6396e-08	1.47155e-07		AKR7A3	1p36.13	-0.183454	2.4799e-07	1.15461e-06
	SNX20	16q12.1	0.197495	2.6708e-08	1.48852e-07		UBE2D3	4q24	-0.183435	2.48716e-07	1.15746e-06
	TRIOBP	22q13.1	0.197455	2.68834e-08	1.49747e-07		NPNT	4q24	-0.183285	2.54479e-07	1.18318e-06
	TLX3	5q35.1	0.197425	2.70184e-08	1.50415e-07		ADNP2	18q23	-0.183261	2.55379e-07	1.18653e-06
	SERPINB2	18q21.33-q22.1	0.197397	2.71428e-08	1.51024e-07		CATSPER2	15q15.3	-0.183241	2.56162e-07	1.18962e-06
	ETFA	15q24.2-q24.3	0.197365	2.7283e-08	1.5172e-07		ZNF718	4p16.3	-0.183096	2.61902e-07	1.21515e-06
	SLFN14	17q12	0.197314	2.75126e-08	1.52784e-07		SENP2	3q27.2	-0.183007	2.65483e-07	1.23063e-06
	GALNS	16q24.3	0.197309	2.75381e-08	1.52883e-07		PPT2	6p21.32	-0.182972	2.6692e-07	1.237e-06
	SLC2A3	12p13.31	0.197294	2.76062e-08	1.53134e-07		C2ORF81	2p13.1	-0.182932	2.68532e-07	1.24361e-06
	TBC1D10C	11q13.2	0.197282	2.7659e-08	1.53385e-07		STPG2	4q22.3-q23	-0.182879	2.70711e-07	1.25283e-06
	PSMA3	14q23.1	0.197256	2.77795e-08	1.5401e-07		ME3	11q14.2	-0.182827	2.72848e-07	1.26214e-06
	KCNK9	8q24.3	0.197152	2.82569e-08	1.56484e-07		TOR1AIP1	1q25.2	-0.182812	2.73485e-07	1.2645e-06
	MSLN	16p13.3	0.197101	2.8493e-08	1.57704e-07		CEACAM16	19q13.31-q13.32	-0.18281	2.73589e-07	1.26451e-06
	FAM9A	Xp22.31	0.197051	2.87292e-08	1.58967e-07		IFT46	11q23.3	-0.182807	2.7368e-07	1.26451e-06
	CTSB	8p23.1	0.197047	2.87501e-08	1.59039e-07		SPIN1	9q22.1	-0.182806	2.7372e-07	1.26451e-06
	TRIT1	1p34.2	0.197041	2.87794e-08	1.59157e-07		ZNF525	19q13.42	-0.182802	2.73894e-07	1.26464e-06
	HOXA3	7p15.2	0.197005	2.89462e-08	1.59991e-07		GTF2F1	19p13.3	-0.182786	2.74554e-07	1.26739e-06
	TXNDC12	1p32.3	0.196974	2.90981e-08	1.60742e-07		MAT2A	2p11.2	-0.182783	2.74695e-07	1.26775e-06
	KRT75	12q13.13	0.196968	2.9124e-08	1.60805e-07		DZANK1	20p11.23	-0.182779	2.74851e-07	1.26818e-06
	GCNT2	6p24.3-p24.2	0.196968	2.91256e-08	1.60805e-07		GPHN	14q23.3	-0.182775	2.75022e-07	1.26867e-06
	NRN1	6p25.1	0.196948	2.92199e-08	1.61281e-07		CCDC83	11q14.1-q14.2	-0.182774	2.75086e-07	1.26868e-06
	TSKS	19q13.33	0.196935	2.92849e-08	1.61595e-07		TASOR	3p14.3	-0.182761	2.75623e-07	1.27086e-06
	CHCHD2	7p11.2	0.196932	2.92961e-08	1.61613e-07		LYRM9	17q11.2	-0.182634	2.80996e-07	1.29385e-06
	RPN1	3q21.3	0.196897	2.94673e-08	1.62378e-07		GCNT4	5q13.3	-0.182575	2.83518e-07	1.30456e-06
	PTS	11q23.1	0.196803	2.99238e-08	1.64667e-07		TEX14	17q22	-0.182559	2.84207e-07	1.30743e-06
	MAP4K4	2q11.2	0.196768	3.00984e-08	1.65537e-07		BTBD10	11p15.3	-0.182472	2.88005e-07	1.3246e-06
	CD37	19q13.33	0.196763	3.01194e-08	1.65607e-07		FBXO8	4q34.1	-0.182448	2.8907e-07	1.32919e-06
	OXGR1	13q32.1	0.196752	3.01734e-08	1.65858e-07		FCHO2	5q13.2	-0.182426	2.90032e-07	1.333e-06
	PPL	16p13.3	0.196728	3.02969e-08	1.66446e-07		SRCAP	16p11.2	-0.182377	2.92179e-07	1.34225e-06
	PYCR1	17q25.3	0.196644	3.07125e-08	1.68683e-07		GTF2IRD2B	7q11.23	-0.182365	2.92724e-07	1.34414e-06
	YPEL4	11q12.1	0.196571	3.10863e-08	1.70549e-07		HSFX2	Xq28	-0.182356	2.93147e-07	1.34578e-06
	C16ORF54	16p11.2	0.196533	3.12786e-08	1.71557e-07		MMP26	11p15.4	-0.182343	2.9372e-07	1.3481e-06
	NAAA	4q21.1	0.196478	3.15608e-08	1.72963e-07		SART3	12q23.3	-0.18231	2.95164e-07	1.3541e-06
	ADRM1	20q13.33	0.196434	3.17914e-08	1.74179e-07		MYO15A	17p11.2	-0.1823	2.9564e-07	1.35598e-06
	CFDP1	16q23.1	0.19642	3.18639e-08	1.74528e-07		TM6SF1	15q25.2	-0.182289	2.96112e-07	1.35783e-06
	SUN2	22q13.1	0.196405	3.1943e-08	1.74866e-07		DYNLL2	17q22	-0.182276	2.9673e-07	1.36035e-06
	ORC6	16q11.2	0.196349	3.2237e-08	1.7633e-07		ZKSCAN3	6p22.1	-0.1822	3.00161e-07	1.37514e-06
	UBE2D1	10q21.1	0.196341	3.2279e-08	1.76512e-07		SLC22A10	11q12.3	-0.182166	3.01724e-07	1.38198e-06
	HR	8p21.3	0.19624	3.28131e-08	1.79168e-07		ZNF263	16p13.3	-0.182078	3.05765e-07	1.39953e-06
	ZIC5	13q32.3	0.196213	3.29597e-08	1.79841e-07		CARTPT	5q13.2	-0.182052	3.06957e-07	1.40422e-06
	MCOLN2	1p22.3	0.196179	3.31438e-08	1.80747e-07		GSTO2	10q25.1	-0.182039	3.0758e-07	1.40591e-06
	SEC61A1	3q21.3	0.196061	3.37904e-08	1.83973e-07		CARD19	9q22.31	-0.181921	3.13127e-07	1.42958e-06
	HKDC1	10q22.1	0.196028	3.39702e-08	1.84852e-07		GFM1	3q25.32	-0.18192	3.13186e-07	1.42958e-06
	LAIR1	19q13.42	0.196006	3.4098e-08	1.85496e-07		WIPF2	17q21.2	-0.181794	3.19213e-07	1.45609e-06
	EPHB1	3q22.2	0.195985	3.42101e-08	1.86056e-07		CDC42BPB	14q32.32	-0.18179	3.19374e-07	1.45649e-06
	KLK15	19q13.33	0.195936	3.44887e-08	1.8752e-07		MDM4	1q32.1	-0.181769	3.20395e-07	1.46048e-06
	C1GALT1	7p22.1-p21.3	0.195912	3.46236e-08	1.88202e-07		ERCC6L2	9q22.32	-0.181707	3.23425e-07	1.47363e-06
	CFAP20	16q21	0.195846	3.49979e-08	1.90082e-07		ZNF799	19p13.2	-0.18159	3.29217e-07	1.49831e-06
	C2	6p21.33	0.195836	3.50569e-08	1.90351e-07		ZNF780A	19q13.2	-0.181551	3.3117e-07	1.50686e-06
	AMTN	4q13.3	0.19581	3.52066e-08	1.9106e-07		SCAI	9q33.3	-0.181469	3.35279e-07	1.52417e-06
	COX7B	Xq21.1	0.195808	3.52181e-08	1.91071e-07		CTSO	4q32.1	-0.181442	3.36669e-07	1.52992e-06
	MMP9	20q13.12	0.195737	3.56234e-08	1.93165e-07		PIGX	3q29	-0.181441	3.36698e-07	1.52992e-06
	RAB42	1p35.3	0.195721	3.57182e-08	1.93627e-07		TAF7	5q31.3	-0.181426	3.37496e-07	1.5332e-06
	CCDC9B	15q15.1	0.195705	3.58142e-08	1.94095e-07		HAGH	16p13.3	-0.181303	3.43786e-07	1.56134e-06
	VCAM1	1p21.2	0.19568	3.59598e-08	1.94778e-07		SLC30A8	8q24.11	-0.181302	3.43845e-07	1.56134e-06
	KRT80	12q13.13	0.195622	3.62992e-08	1.9651e-07		SLC26A5	7q22.1	-0.181277	3.45136e-07	1.56649e-06
	GRB14	2q24.3	0.195583	3.65315e-08	1.97714e-07		AZU1	19p13.3	-0.181176	3.50465e-07	1.58959e-06
[truncated: 2,492 more rows]
