# Supplementary material for: TP53mutation–associated and copy number–dependent KDM7A-DT expression affects DNA repair and promotes invasive breast cancer progression
Source: Research Square preprint supplement (doi:10.21203/rs.3.rs-1896103/v3), 2022-09-27
Supplement: Supplementary file 14 [file 8a1a4e395d2edf5d71aec0a0.xlsx]

## Sheet: ST13
Table S13. GO terms and the list of the annotated and statistics of enrichment the genes/ proteins belonging to the observed GO categories.
	color	#term ID	term description	observed gene count	background gene count	strength	false discovery rate	matching proteins in the network (IDs)	matching proteins in the network (labels)
Fig.S6.E (Physical Networs)
		GO:0051726	regulation of cell cycle	18	1230	0.8	1.69e-08	9606.ENSP00000225577,9606.ENSP00000228872,9606.ENSP00000262643,9606.ENSP00000275493,9606.ENSP00000277541,9606.ENSP00000293288,9606.ENSP00000307272,9606.ENSP00000332973,9606.ENSP00000362680,9606.ENSP00000366109,9606.ENSP00000368632,9606.ENSP00000371475,9606.ENSP00000372088,9606.ENSP00000376436,9606.ENSP00000376943,9606.ENSP00000381185,9606.ENSP00000388648,9606.ENSP00000408695	RPS6KB1,CDKN1B,CCNE1,EGFR,NOTCH1,BAX,RPTOR,SMAD3,SRC,ANXA1,GATA3,TP53BP1,RAD51,ETS1,BCL2L11,BCL2,CHEK1,PRKCA
		GO:0042060	wound healing	11	439	1.04	4.86e-07	9606.ENSP00000264012,9606.ENSP00000267101,9606.ENSP00000275493,9606.ENSP00000332973,9606.ENSP00000337825,9606.ENSP00000362680,9606.ENSP00000368632,9606.ENSP00000373574,9606.ENSP00000376436,9606.ENSP00000379287,9606.ENSP00000408695	CDH3,ERBB3,EGFR,SMAD3,LCK,SRC,GATA3,ACVRL1,ETS1,YWHAZ,PRKCA
		GO:0001666	response to hypoxia	9	342	1.06	7.37e-06	9606.ENSP00000179259,9606.ENSP00000228872,9606.ENSP00000262887,9606.ENSP00000277541,9606.ENSP00000332973,9606.ENSP00000362680,9606.ENSP00000373574,9606.ENSP00000376436,9606.ENSP00000381185	C12orf5,CDKN1B,XRCC1,NOTCH1,SMAD3,SRC,ACVRL1,ETS1,BCL2
		GO:0006282	regulation of DNA repair	6	129	1.31	4.32e-05	9606.ENSP00000179259,9606.ENSP00000262887,9606.ENSP00000275493,9606.ENSP00000371475,9606.ENSP00000372088,9606.ENSP00000388648	C12orf5,XRCC1,EGFR,TP53BP1,RAD51,CHEK1
RCTM/Reactome		HSA-212436	Generic Transcription Pathway	25	1197	0.96	9.52e-15	9606.ENSP00000179259,9606.ENSP00000228872,9606.ENSP00000262643,9606.ENSP00000262746,9606.ENSP00000263826,9606.ENSP00000275493,9606.ENSP00000277541,9606.ENSP00000288135,9606.ENSP00000293288,9606.ENSP00000296782,9606.ENSP00000307272,9606.ENSP00000320485,9606.ENSP00000325120,9606.ENSP00000332973,9606.ENSP00000362680,9606.ENSP00000363822,9606.ENSP00000368100,9606.ENSP00000368632,9606.ENSP00000376943,…	C12orf5,CDKN1B,CCNE1,PRDX1,AKT3,EGFR,NOTCH1,KIT,BAX,RICTOR,RPTOR,ARID1A,PGR,SMAD3,SRC,AR,RAD50,GATA3,BCL2L11,G6PD,YWHAZ,CHEK1,ESR1,WWTR1,YAP1
Disaeses		DOID:162	Cancer	23	951	1.02	4.97e-15	9606.ENSP00000228872,9606.ENSP00000262643,9606.ENSP00000262887,9606.ENSP00000267101,9606.ENSP00000275493,9606.ENSP00000277541,9606.ENSP00000288135,9606.ENSP00000293288,9606.ENSP00000320485,9606.ENSP00000325120,9606.ENSP00000337825,9606.ENSP00000353224,9606.ENSP00000362680,9606.ENSP00000363822,9606.ENSP00000368100,9606.ENSP00000368632,9606.ENSP00000372088,9606.ENSP00000376436,9606.ENSP00000381185,…	CDKN1B,CCNE1,XRCC1,ERBB3,EGFR,NOTCH1,KIT,BAX,ARID1A,PGR,LCK,TFRC,SRC,AR,RAD50,GATA3,RAD51,ETS1,BCL2,ESR1,PRKCA,WWTR1,YAP1
Fig.S6.F (Functional Networks)
		GO:0006950	response to stress	29	3485	0.56	1.64e-09	9606.ENSP00000179259,9606.ENSP00000228872,9606.ENSP00000262746,9606.ENSP00000262887,9606.ENSP00000264012,9606.ENSP00000267101,9606.ENSP00000275493,9606.ENSP00000277541,9606.ENSP00000288135,9606.ENSP00000293288,9606.ENSP00000307272,9606.ENSP00000332973,9606.ENSP00000337825,9606.ENSP00000362680,9606.ENSP00000366109,9606.ENSP00000368100,9606.ENSP00000368632,9606.ENSP00000371475,9606.ENSP00000372088,…	C12orf5,CDKN1B,PRDX1,XRCC1,CDH3,ERBB3,EGFR,NOTCH1,KIT,BAX,RPTOR,SMAD3,LCK,SRC,ANXA1,RAD50,GATA3,TP53BP1,RAD51,ACVRL1,ETS1,BCL2L11,G6PD,YWHAZ,BCL2,CHEK1,MAPK9,PRKCA,YAP1
		GO:0008284	positive regulation of cell population proliferation	22	919	1.02	1.91e-14	9606.ENSP00000228872,9606.ENSP00000262643,9606.ENSP00000263826,9606.ENSP00000264012,9606.ENSP00000267101,9606.ENSP00000275493,9606.ENSP00000277541,9606.ENSP00000288135,9606.ENSP00000296782,9606.ENSP00000304895,9606.ENSP00000307272,9606.ENSP00000353224,9606.ENSP00000355330,9606.ENSP00000363822,9606.ENSP00000366109,9606.ENSP00000373574,9606.ENSP00000376436,9606.ENSP00000381185,9606.ENSP00000405330,…	CDKN1B,CCNE1,AKT3,CDH3,ERBB3,EGFR,NOTCH1,KIT,RICTOR,IRS1,RPTOR,TFRC,TGM2,AR,ANXA1,ACVRL1,ETS1,BCL2,ESR1,PRKCA,WWTR1,YAP1
		GO:0051173	positive regulation of nitrogen compound metabolic process	33	3239	0.65	9.75e-14	9606.ENSP00000179259,9606.ENSP00000225577,9606.ENSP00000228872,9606.ENSP00000262643,9606.ENSP00000262887,9606.ENSP00000267101,9606.ENSP00000275493,9606.ENSP00000277541,9606.ENSP00000288135,9606.ENSP00000293288,9606.ENSP00000296782,9606.ENSP00000307272,9606.ENSP00000320485,9606.ENSP00000325120,9606.ENSP00000332973,9606.ENSP00000337825,9606.ENSP00000353224,9606.ENSP00000362680,9606.ENSP00000363822,…	C12orf5,RPS6KB1,CDKN1B,CCNE1,XRCC1,ERBB3,EGFR,NOTCH1,KIT,BAX,RICTOR,RPTOR,ARID1A,PGR,SMAD3,LCK,TFRC,SRC,AR,RAD50,GATA3,TP53BP1,RAD51,ACVRL1,ETS1,BCL2L11,BCL2,CHEK1,MAPK9,ESR1,PRKCA,WWTR1,YAP1
		GO:0035295	tube development	20	851	1.01	7.76e-13	9606.ENSP00000179259,9606.ENSP00000275493,9606.ENSP00000277541,9606.ENSP00000288135,9606.ENSP00000293288,9606.ENSP00000320485,9606.ENSP00000325120,9606.ENSP00000332973,9606.ENSP00000355330,9606.ENSP00000362680,9606.ENSP00000363822,9606.ENSP00000368632,9606.ENSP00000373574,9606.ENSP00000376436,9606.ENSP00000376943,9606.ENSP00000379287,9606.ENSP00000381185,9606.ENSP00000405330,9606.ENSP00000408695,…	C12orf5,EGFR,NOTCH1,KIT,BAX,ARID1A,PGR,SMAD3,TGM2,SRC,AR,GATA3,ACVRL1,ETS1,BCL2L11,YWHAZ,BCL2,ESR1,PRKCA,YAP1
		GO:0009725	response to hormone	18	849	0.96	7.57e-11	9606.ENSP00000225577,9606.ENSP00000228872,9606.ENSP00000262643,9606.ENSP00000275493,9606.ENSP00000277541,9606.ENSP00000288135,9606.ENSP00000304895,9606.ENSP00000320485,9606.ENSP00000325120,9606.ENSP00000362680,9606.ENSP00000363822,9606.ENSP00000366109,9606.ENSP00000368632,9606.ENSP00000376943,9606.ENSP00000381185,9606.ENSP00000405330,9606.ENSP00000478927,9606.ENSP00000483300	RPS6KB1,CDKN1B,CCNE1,EGFR,NOTCH1,KIT,IRS1,ARID1A,PGR,SRC,AR,ANXA1,GATA3,BCL2L11,BCL2,ESR1,YAP1,ACACA
