# Supplementary material for: TP53mutation–associated and copy number–dependent KDM7A-DT expression affects DNA repair and promotes invasive breast cancer progression
Source: Research Square preprint supplement (doi:10.21203/rs.3.rs-1896103/v3), 2022-09-27
Supplement: Supplementary file 15 [file 8b7edd1387e4631c9a3379a5.xlsx]

## Sheet: ST9
Table S9.	Frequency distributions of copy number alteration of cancer(CNA) samples (N=2037; n_i_>30; i=1,2,…,20 ). PanCancer Analysis of Whole Genomes (PCAWG) dataset
n/n	Cancer type	Ampli-fication	Gain	Diploid	Shallow Deletion	Deep Deletion	Total	Amp+Gain (1)	Shallow+Del (2)	Differences (1)-(2)	Frequency distribution skewness; p-value, ANOVA
1	Hepatocellular Carcinoma	13	85	207	18	0	323	98	18	80	8.658e-13
2	Pilocytic Astrocytoma	15	52	22	0	0	89	67	0	67	3.426e-10
3	Melanoma	21	45	37	4	0	107	66	4	62	5.207e-10
4	Prostate Adenocarcinoma	6	30	236	3	0	275	36	3	33	5.155e-08
5	Medulloblastoma	8	26	58	1	0	93	34	1	33	4.204e-07
6	Pancreatic Neuroendocrine Tumor	23	18	38	2	0	81	41	2	39	6.308e-07
7	Serous Ovarian Cancer	13	32	50	5	0	100	45	5	40	9.741e-07
8	Glioblastoma	6	25	8	0	0	39	31	0	31	7.085e-06
9	Renal Clear Cell Carcinoma	5	21	84	1	0	111	26	1	25	9.914e-05
10	Colorectal Adenocarcinoma	4	16	24	0	0	44	20	0	20	0.0006139
11	Papillary Renal Cell Carcinoma	11	11	10	0	0	32	22	0	22	0.0006758
12	Breast Invasive Ductal Carcinoma	15	43	110	28	0	196	58	28	30	0.001219
13	Osteosarcoma	2	10	23	0	0	35	12	0	12	0.003254
14	Pancreatic Adenocarcinoma	2	35	161	18	1	217	37	19	18	0.08257
15	Lung Squamous Cell Carcinoma	4	13	23	7	0	47	17	7	10	>0.1
16	Esophageal Adenocarcinoma	8	20	46	22	1	97	28	23	5	>0.1
17	Chromophobe Renal Cell Carcinoma	3	7	31	2	0	43	10	2	8	>0.1
18	Lung Adenocarcinoma	4	8	16	6	0	34	12	6	6	>0.1
19	Papillary Thyroid Cancer	1	0	30	0	0	31	1	0	1	>0.1
20	Head and Neck Squamous Cell Carcinoma	1	7	26	9	0	43	8	9	-1	>0.1
	Total	165	504	1240	126	2	2037	669	128	541
