# Supplementary material for: TP53mutation–associated and copy number–dependent KDM7A-DT expression affects DNA repair and promotes invasive breast cancer progression
Source: Research Square preprint supplement (doi:10.21203/rs.3.rs-1896103/v3), 2022-09-27
Supplement: Supplementary file 16 [file 917ba29627254a97db6d604f.xlsx]

## Sheet: ST3.MRC5
Table S3. Differentially expressed genes.
A. MRC5 cells
	Up-regulated genes							Down-regulated genes
	ProbeID	GenesID	EntrezID	Fold-Change	Log2(Fold-Change)	P-Value		ProbeID	GenesID	EntrezID	Fold-Change	Log2(Fold-Change)	P-Value	Fold-Change (dowmreg)
	ILMN_1793474	INSIG1	3638	4.20178	2.071	0		ILMN_1785272	COL1A2	1278	0.211393	-2.242	0	4.73052
	ILMN_2053415	LDLR	3949	3.97512	1.991	0		ILMN_2347798	IFI6	2537	0.228141	-2.132	1.9e-05	4.38325
	ILMN_1689329	SCD	6319	3.72696	1.898	0		ILMN_1795325	ACTG2	72	0.237007	-2.077	0	4.21929
	ILMN_1680618	MYC	4609	3.00424	1.587	0		ILMN_1652826	LRRC17	10234	0.238986	-2.065	0	4.18434
	ILMN_1670134	FADS1	3992	2.7057	1.436	0		ILMN_1658356	PAMR1	25891	0.255607	-1.968	0	3.91225
	ILMN_1671554	LPIN1	23175	2.69447	1.43	0		ILMN_1726589	CD248	57124	0.26134	-1.936	0	3.82643
	ILMN_1784871	FASN	2194	2.63171	1.396	0		ILMN_2117508	CTHRC1	115908	0.272627	-1.875	0	3.66802
	ILMN_2150856	SERPINB2	5055	2.45547	1.296	0.000574		ILMN_1801246	IFITM1	8519	0.288771	-1.792	0.00082	3.46295
	ILMN_1703852	EFNB2	1948	2.44359	1.289	0		ILMN_1701308	COL1A1	1277	0.291385	-1.779	0	3.43188
	ILMN_1720889	SC4MOL	NA	2.38502	1.254	0		ILMN_1738742	PLAT	5327	0.294023	-1.766	0	3.4011
	ILMN_1683664	LOC650369	NA	2.19162	1.132	0		ILMN_2315979	LBH	81606	0.303549	-1.72	0	3.29436
	ILMN_1784459	MMP3	4314	2.16145	1.112	0.001414		ILMN_1778668	TAGLN	6876	0.32421	-1.625	0	3.08442
	ILMN_2105919	FGF2	2247	2.12579	1.088	0		ILMN_1784749	GAS6	2621	0.32942	-1.602	0	3.03564
	ILMN_2089329	SPRY2	10253	2.09072	1.064	0		ILMN_1724686	CLDN1	9076	0.330106	-1.599	2e-06	3.02933
	ILMN_1768534	BHLHB2	NA	2.0648	1.046	0		ILMN_1779875	THY1	7070	0.330793	-1.596	0	3.02304
	ILMN_1898124	HS.25892	NA	2.04344	1.031	0		ILMN_1693009	FGL2	10875	0.332402	-1.589	0	3.00841
	ILMN_3272603	FAM60A	NA	2.03214	1.023	0		ILMN_1705750	TGM2	7052	0.339386	-1.559	0	2.9465
	ILMN_1723158	NOP2	4839	2.03073	1.022	0		ILMN_1669362	IGFBP6	3489	0.355027	-1.494	0	2.81669
	ILMN_1678842	THBS2	7058	2.00277	1.002	0		ILMN_1713266	FAM46C	NA	0.356754	-1.487	0	2.80306
	ILMN_1689652	RNMTL1	NA	1.98619	0.99	0		ILMN_1773079	COL3A1	1281	0.35824	-1.481	0	2.79142
	ILMN_1722718	BMP2	650	1.97247	0.98	7e-06		ILMN_1662358	MX1	4599	0.358737	-1.479	0.001599	2.78755
	ILMN_1665736	LOC648024	NA	1.95206	0.965	0		ILMN_2062468	IGFBP7	3490	0.361233	-1.469	1e-06	2.7683
	ILMN_2061732	YRDC	79693	1.95071	0.964	0		ILMN_1669523	FOS	2353	0.37475	-1.416	0	2.66845
	ILMN_3266606	FABP5L2	NA	1.95071	0.964	6e-06		ILMN_1815057	PDGFRB	5159	0.378929	-1.4	0	2.63902
	ILMN_2360705	ACSL3	2181	1.94531	0.96	0		ILMN_2067269	RECK	8434	0.387428	-1.368	0	2.58112
	ILMN_1771051	RPL29	6159	1.93589	0.953	0		ILMN_1713751	ADAM19	8728	0.388773	-1.363	0	2.5722
	ILMN_1659058	PPP1R10	5514	1.93053	0.949	1e-06		ILMN_2133675	SGSH	6448	0.393109	-1.347	0	2.54383
	ILMN_1844593	HS.551128	NA	1.92252	0.943	1e-06		ILMN_1653028	COL4A1	1282	0.395295	-1.339	0.000588	2.52976
	ILMN_1735461	DDX21	9188	1.91587	0.938	2e-06		ILMN_2223941	FBLN5	10516	0.39832	-1.328	0	2.51054
	ILMN_1689088	COLEC12	81035	1.91322	0.936	0		ILMN_3248591	LTBP2	4053	0.4036	-1.309	0	2.4777
	ILMN_1651610	LOC730525	NA	1.90264	0.928	0		ILMN_1678493	CHN1	1123	0.40669	-1.298	0	2.45888
	ILMN_2297626	PEG10	23089	1.90132	0.927	0		ILMN_1657373	LEPREL1	NA	0.409235	-1.289	5.5e-05	2.44359
	ILMN_2148847	AKIRIN2	55122	1.88688	0.916	0		ILMN_1720048	CCL2	6347	0.412081	-1.279	0.001526	2.42671
	ILMN_2041293	SQLE	6713	1.88426	0.914	0		ILMN_2089875	TNFSF4	7292	0.413512	-1.274	0	2.41831
	ILMN_1693338	CYP1B1	1545	1.86736	0.901	7.4e-05		ILMN_1767665	LOC493869	NA	0.421908	-1.245	0	2.37019
	ILMN_1663092	CITED2	10370	1.86477	0.899	0		ILMN_1672536	FBLN1	2192	0.424548	-1.236	0	2.35545
	ILMN_2115218	ANKRD10	55608	1.86477	0.899	2e-06		ILMN_1698243	C1ORF85	NA	0.428094	-1.224	0	2.33594
	ILMN_1691860	SPRY1	10252	1.85703	0.893	0		ILMN_1667893	TNS3	64759	0.437392	-1.193	0	2.28628
	ILMN_1701243	C10ORF2	NA	1.85189	0.889	0		ILMN_1680339	PDGFRL	5157	0.439825	-1.185	0	2.27363
	ILMN_1786433	BCCIP	56647	1.84933	0.887	0		ILMN_1693334	P4HA1	5033	0.443498	-1.173	1e-06	2.2548
	ILMN_2144088	FDFT1	2222	1.84933	0.887	1e-06		ILMN_1684391	PLOD1	5351	0.444421	-1.17	0	2.25012
	ILMN_1803811	TRIB1	10221	1.84805	0.886	1e-06		ILMN_1766914	MFAP4	4239	0.445655	-1.166	2.2e-05	2.24389
	ILMN_1770206	GEMIN4	50628	1.84038	0.88	0		ILMN_1729117	COL5A2	1290	0.445964	-1.165	1e-06	2.24233
	ILMN_1666022	TNFRSF10D	8793	1.83783	0.878	0.001998		ILMN_1790689	CRISPLD2	83716	0.454389	-1.138	0	2.20076
	ILMN_1653001	CABLES1	91768	1.83655	0.877	0		ILMN_1738116	TMEM119	338773	0.456283	-1.132	1e-05	2.19162
	ILMN_1814282	ISG20L1	NA	1.83274	0.874	0		ILMN_1663866	TGFBI	7045	0.456599	-1.131	0	2.19011
	ILMN_1670752	KIAA0907	NA	1.82893	0.871	0		ILMN_2129572	F3	2152	0.458184	-1.126	0	2.18253
	ILMN_2399893	RPS24	6229	1.8226	0.866	0		ILMN_1736670	PPP1R3C	5507	0.462011	-1.114	0	2.16445
	ILMN_2180371	C12ORF24	NA	1.81252	0.858	0		ILMN_1798952	KDELR3	11015	0.463937	-1.108	0	2.15547
	ILMN_2101278	RGS18	64407	1.80876	0.855	0		ILMN_1788955	PDLIM1	9124	0.464902	-1.105	0	2.15099
	ILMN_1691747	KHDRBS3	10656	1.80751	0.854	0		ILMN_1698213	RBM3	5935	0.466193	-1.101	0	2.14503
	ILMN_1789775	WDR74	54663	1.805	0.852	0		ILMN_1702231	C1ORF54	NA	0.467488	-1.097	2.2e-05	2.13909
	ILMN_2224833	ADIPOR2	79602	1.8	0.848	0		ILMN_1792885	CTSC	1075	0.467488	-1.097	2.5e-05	2.13909
	ILMN_1744147	CEBPZ	10153	1.79005	0.84	2e-06		ILMN_2329735	ECM1	1893	0.470739	-1.087	0	2.12432
	ILMN_1682717	IER3	8870	1.78633	0.837	8e-06		ILMN_1802654	GLT8D2	83468	0.472046	-1.083	0	2.11844
	ILMN_2088124	TMEM154	201799	1.78262	0.834	0.000572		ILMN_1759097	MLLT11	10962	0.476319	-1.07	0	2.09943
	ILMN_1751120	HIST1H4H	NA	1.77031	0.824	0.003208		ILMN_1693394	BCKDK	10295	0.476649	-1.069	0	2.09798
	ILMN_1653529	TEX10	54881	1.76663	0.821	0		ILMN_1773567	LAMA5	3911	0.478304	-1.064	0	2.09072
	ILMN_1803799	LOC649555	NA	1.76663	0.821	2e-06		ILMN_1776005	OSTC	58505	0.479965	-1.059	0	2.08349
	ILMN_1730645	TMEFF2	23671	1.76418	0.819	0.000136		ILMN_1706505	COL5A1	1289	0.481297	-1.055	1.7e-05	2.07772
	ILMN_1780132	PELI2	57161	1.76174	0.817	1e-06		ILMN_1666819	PHLDB1	23187	0.485317	-1.043	0	2.06051
	ILMN_1768488	TERF2	7014	1.76052	0.816	0		ILMN_1716687	TPM1	7168	0.487678	-1.036	0	2.05053
	ILMN_2083469	IRS2	8660	1.75686	0.813	0		ILMN_1662419	COX7A1	1346	0.489032	-1.032	0	2.04486
	ILMN_1713875	NME1	4830	1.74715	0.805	0		ILMN_1700950	LOC646567	NA	0.490729	-1.027	0	2.03778
	ILMN_1796210	PPRC1	23082	1.74715	0.805	0		ILMN_2066151	TEK	7010	0.491751	-1.024	0.00023	2.03355
	ILMN_1737514	KYNU	8942	1.7411	0.8	0.000218		ILMN_2188264	CYR61	NA	0.492433	-1.022	0	2.03073
	ILMN_1671257	DKC1	1736	1.73989	0.799	0		ILMN_1808713	HSD17B2	3294	0.494143	-1.017	1e-06	2.02371
	ILMN_1754860	MRPS12	6183	1.73267	0.793	0		ILMN_1707070	PCOLCE	5118	0.496202	-1.011	0	2.01531
	ILMN_1653871	NAMPT	10135	1.72907	0.79	0.000143		ILMN_1815673	DKK3	27122	0.497925	-1.006	0	2.00833
	ILMN_1773459	SOX11	6664	1.72548	0.787	1.4e-05		ILMN_1690921	STAT2	6773	0.500347	-0.999	0.001167	1.99861
	ILMN_1775743	BTG1	694	1.7219	0.784	0		ILMN_1756071	MFGE8	4240	0.501041	-0.997	0	1.99585
	ILMN_1717490	RPL6	6128	1.72071	0.783	0		ILMN_1766675	CDH6	1004	0.502084	-0.994	0	1.9917
	ILMN_1738816	FOXO1	2308	1.71594	0.779	0		ILMN_1696749	LMNA	4000	0.503129	-0.991	0	1.98756
	ILMN_2234697	BEX1	55859	1.70764	0.772	0		ILMN_1770290	CNN2	1265	0.503478	-0.99	0	1.98618
	ILMN_2356672	EIF2B4	8890	1.70764	0.772	0		ILMN_1691237	CAP2	10486	0.504526	-0.987	0	1.98206
	ILMN_1726743	MRPS30	10884	1.70764	0.772	4e-06		ILMN_1784948	SPOCD1	90853	0.504526	-0.987	0	1.98206
	ILMN_1808779	CSTF3	1479	1.70527	0.77	0		ILMN_1730487	CALD1	800	0.50698	-0.98	0	1.97247
	ILMN_1667561	IFRD1	3475	1.70527	0.77	0		ILMN_1742981	TUBA1A	7846	0.509446	-0.973	1e-06	1.96292
	ILMN_1707652	KRTAP1-5	83895	1.69937	0.765	1.8e-05		ILMN_1748707	CRELD2	79174	0.510506	-0.97	0	1.95884
	ILMN_1724040	ANKRD57	NA	1.69584	0.762	0		ILMN_1752968	LAMB2	3913	0.51086	-0.969	1e-06	1.95748
	ILMN_2146761	FABP5	2171	1.69584	0.762	0.000179		ILMN_1722634	NUCB1	4924	0.511214	-0.968	0	1.95613
	ILMN_1768962	AKAP8L	26993	1.69466	0.761	5e-06		ILMN_2380237	C1QTNF1	114897	0.513345	-0.962	0	1.94801
	ILMN_1797728	HMGCS1	3157	1.69114	0.758	0.000265		ILMN_1736256	CALR	811	0.513345	-0.962	1e-06	1.94801
	ILMN_1777061	ZSWIM6	57688	1.68413	0.752	1e-05		ILMN_1772627	D4S234E	NA	0.513701	-0.961	6.8e-05	1.94666
	ILMN_2339955	NR4A2	4929	1.68413	0.752	3.6e-05		ILMN_1790891	CKAP4	10970	0.517991	-0.949	6e-06	1.93053
	ILMN_1663113	TTLL12	23170	1.68296	0.751	1e-06		ILMN_1691341	IL7R	3575	0.52015	-0.943	0	1.92252
	ILMN_1765578	TIPARP	25976	1.67597	0.745	4e-06		ILMN_1705682	LEPREL2	NA	0.52015	-0.943	2e-06	1.92252
	ILMN_2112811	RPL36A	6173	1.67481	0.744	0		ILMN_1678729	SIL1	64374	0.523405	-0.934	0	1.91057
	ILMN_1760280	NXT1	29107	1.67249	0.742	0		ILMN_2206746	BGN	633	0.523768	-0.933	0.002432	1.90924
	ILMN_1748591	ODC1	4953	1.67249	0.742	0.000125		ILMN_1719759	TNC	3371	0.525586	-0.928	0	1.90264
	ILMN_1682226	CLDN15	24146	1.67133	0.741	0		ILMN_1860084	HS.545976	NA	0.527777	-0.922	0.002647	1.89474
	ILMN_1671844	EYA4	2070	1.67018	0.74	0		ILMN_1701558	MAP1A	4130	0.528143	-0.921	0	1.89343
	ILMN_1781454	RAE1	8480	1.66786	0.738	0		ILMN_1809850	RCN3	57333	0.528143	-0.921	0	1.89343
	ILMN_1673252	AIMP2	7965	1.66671	0.737	0		ILMN_1716382	LOC387882	NA	0.528143	-0.921	0.000491	1.89343
	ILMN_1682792	BYSL	705	1.66555	0.736	0		ILMN_1771376	PEA15	8682	0.528509	-0.92	0	1.89212
	ILMN_2324998	NGDN	25983	1.66555	0.736	0		ILMN_1745607	A2M	2	0.529609	-0.917	1e-06	1.88818
	ILMN_3247723	NOP16	51491	1.66555	0.736	0		ILMN_1664294	LEPRE1	NA	0.531448	-0.912	0	1.88165
	ILMN_1664167	RPF2	84154	1.66324	0.734	0		ILMN_2381697	P4HA2	8974	0.531816	-0.911	0	1.88035
	ILMN_1811955	PRMT5	10419	1.66324	0.734	1.5e-05		ILMN_2214144	TWSG1	57045	0.531816	-0.911	0.002163	1.88035
	ILMN_1705908	RPL7L1	285855	1.65634	0.728	5.6e-05		ILMN_1775501	IL1B	3553	0.532554	-0.909	0	1.87774
	ILMN_1743199	EGR2	1959	1.65519	0.727	2e-06		ILMN_1714861	CD68	968	0.534033	-0.905	0.000902	1.87254
	ILMN_1682775	EDN1	1906	1.6529	0.725	1e-05		ILMN_1723467	ITGB1	3688	0.534774	-0.903	0	1.86995
	ILMN_1710571	PAPD5	NA	1.64947	0.722	0		ILMN_2391861	GSTM1	2944	0.535515	-0.901	0	1.86736
	ILMN_3240321	AEN	64782	1.64947	0.722	4e-06		ILMN_1771987	SLC44A2	57153	0.537375	-0.896	0	1.8609
	ILMN_1734317	DPF2	5977	1.64718	0.72	0		ILMN_1778173	AK3	50808	0.538493	-0.893	1e-06	1.85703
	ILMN_1698968	ASXL2	55252	1.64718	0.72	1e-06		ILMN_1814998	FKSG30	NA	0.539614	-0.89	0.0015	1.85318
	ILMN_1658448	KRTAP2-1	81872	1.6449	0.718	0.000552		ILMN_2054019	ISG15	9636	0.539614	-0.89	0.024266	1.85318
	ILMN_1791483	PDE4D	5144	1.64376	0.717	1.4e-05		ILMN_3272500	IFI27L1	122509	0.540363	-0.888	0.000104	1.85061
	ILMN_1660067	LOC728285	NA	1.64035	0.714	0.009428		ILMN_2232177	ACTN1	87	0.541488	-0.885	3e-06	1.84676
	ILMN_1723729	RSL1D1	26156	1.63807	0.712	2e-06		ILMN_2294762	AMY1A	276	0.542615	-0.882	1e-06	1.84293
	ILMN_1666739	RBM15	64783	1.63807	0.712	1.6e-05		ILMN_2038775	TUBB2A	7280	0.542615	-0.882	1.5e-05	1.84293
	ILMN_1773968	SERBP1	26135	1.63694	0.711	6e-06		ILMN_2149226	CAV1	857	0.542991	-0.881	0	1.84165
	ILMN_1780773	LOC400027	NA	1.63354	0.708	6.6e-05		ILMN_1655913	NUCB2	4925	0.543367	-0.88	6e-06	1.84038
	ILMN_1716195	HIST1H2BG	NA	1.63014	0.705	1e-06		ILMN_1769245	GLIPR1	11010	0.543367	-0.88	2.8e-05	1.84038
	ILMN_1721024	SRFBP1	153443	1.63014	0.705	5e-06		ILMN_1729208	NGFRAP1	NA	0.544876	-0.876	0	1.83528
	ILMN_2247664	SON	6651	1.62902	0.704	0		ILMN_1675848	MYL12A	10627	0.545254	-0.875	0.009251	1.83401
	ILMN_2314169	PTHLH	5744	1.62789	0.703	2e-06		ILMN_1772824	WNT5B	81029	0.547526	-0.869	9e-05	1.8264
	ILMN_1666502	SOBP	55084	1.62001	0.696	0.013022		ILMN_1810836	PDE5A	8654	0.547526	-0.869	0.00054	1.8264
	ILMN_1671442	WDR43	23160	1.61217	0.689	1.9e-05		ILMN_1745134	TMEM16D	NA	0.547906	-0.868	0	1.82513
	ILMN_1722059	SAFB	6294	1.60993	0.687	0		ILMN_1756541	MXD4	10608	0.548286	-0.867	1e-06	1.82387
	ILMN_1788416	FAM108C1	NA	1.60993	0.687	5e-06		ILMN_1651429	SELM	NA	0.549808	-0.863	7e-06	1.81882
	ILMN_1726456	SLC3A2	6520	1.60993	0.687	0.000589		ILMN_1727043	GLT25D1	NA	0.551335	-0.859	5.8e-05	1.81378
	ILMN_1900661	HS.145049	NA	1.60882	0.686	9e-05		ILMN_3240316	TMSL3	NA	0.552099	-0.857	7e-06	1.81127
	ILMN_1734602	SRRM2	23524	1.60436	0.682	9.7e-05		ILMN_2336609	SYTL2	54843	0.552099	-0.857	0.000118	1.81127
	ILMN_1815115	CYC1	1537	1.60103	0.679	0		ILMN_1735180	NCSTN	23385	0.552482	-0.856	0	1.81001
	ILMN_1782110	ZNF295	NA	1.59992	0.678	3e-06		ILMN_1803162	RTEL1	51750	0.552482	-0.856	0.00067	1.81001
	ILMN_2374865	ATF3	467	1.59549	0.674	0.000176		ILMN_1744487	C1QTNF5	114902	0.553249	-0.854	0.004488	1.80751
	ILMN_1753249	DDX10	1662	1.59328	0.672	0.020911		ILMN_2228215	ANO4	121601	0.554016	-0.852	0	1.805
	ILMN_1805192	ITPRIP	85450	1.58887	0.668	0.000156		ILMN_1729216	CRYAB	1410	0.554785	-0.85	0	1.8025
	ILMN_1786189	MKI67IP	NA	1.58777	0.667	2e-06		ILMN_1728923	F2RL2	2151	0.555169	-0.849	0	1.80125
	ILMN_1809285	DCP1A	55802	1.58777	0.667	2.2e-05		ILMN_3244117	STMN3	50861	0.557097	-0.844	1e-06	1.79502
	ILMN_1775939	SF3B2	10992	1.58667	0.666	3e-06		ILMN_2306189	MAGED1	9500	0.557483	-0.843	0	1.79378
	ILMN_1662318	CCDC59	29080	1.58447	0.664	9.9e-05		ILMN_1751028	SERPINH1	871	0.558644	-0.84	0.000239	1.79005
	ILMN_1738401	FOXC1	2296	1.58447	0.664	0.000208		ILMN_1664912	IL11RA	3590	0.560195	-0.836	0	1.78509
	ILMN_1776080	GTPBP6	8225	1.58337	0.663	0		ILMN_1666976	PLD3	23646	0.56175	-0.832	0	1.78015
	ILMN_1656369	C8ORF4	NA	1.58337	0.663	3e-06		ILMN_1728049	S100A16	140576	0.56175	-0.832	3.4e-05	1.78015
	ILMN_1769319	CNBP	7555	1.58227	0.662	0.000289		ILMN_1695311	HLA-DMA	3108	0.56214	-0.831	3.3e-05	1.77892
	ILMN_1767658	RRS1	23212	1.58008	0.66	0.000379		ILMN_1662640	C20ORF127	NA	0.562919	-0.829	9.8e-05	1.77645
	ILMN_1779648	HIST3H2A	NA	1.57789	0.658	1e-06		ILMN_1691476	MYLK	4638	0.56331	-0.828	0	1.77522
	ILMN_3241257	POLR3E	55718	1.5768	0.657	3e-06		ILMN_1659688	LGALS3BP	3959	0.564091	-0.826	0.010802	1.77276
	ILMN_3207933	LOC647150	647150	1.5768	0.657	1.8e-05		ILMN_1731107	CCDC92	80212	0.564482	-0.825	0	1.77154
	ILMN_1810392	ZNHIT2	741	1.5768	0.657	2.1e-05		ILMN_1797822	SEL1L3	23231	0.564482	-0.825	0	1.77154
	ILMN_2049727	C20ORF111	NA	1.5768	0.657	4.1e-05		ILMN_1724533	LY96	23643	0.564482	-0.825	5e-06	1.77154
	ILMN_2403555	DHX30	22907	1.57462	0.655	3.2e-05		ILMN_1658575	GALNT5	11227	0.565657	-0.822	1e-06	1.76786
	ILMN_1725620	GGNBP2	79893	1.57352	0.654	1e-06		ILMN_2415179	CLSTN1	22883	0.567621	-0.817	0	1.76174
	ILMN_1742166	GRWD1	83743	1.57026	0.651	3e-06		ILMN_2112493	DAP	1611	0.567621	-0.817	3.2e-05	1.76174
	ILMN_1684982	PDK4	5166	1.57026	0.651	2.1e-05		ILMN_1769520	UBE2L6	9246	0.568408	-0.815	0.028399	1.7593
	ILMN_1781104	MAP2K7	5609	1.56917	0.65	5.6e-05		ILMN_1716397	LAYN	143903	0.569197	-0.813	3e-05	1.75686
	ILMN_2189993	MRPS35	60488	1.56917	0.65	0.000142		ILMN_1685397	ITGA3	3675	0.569592	-0.812	0	1.75564
	ILMN_1654583	CHD1	1105	1.56808	0.649	0.000631		ILMN_1668721	CCND3	896	0.569592	-0.812	2.6e-05	1.75564
	ILMN_1688971	NOL11	25926	1.56482	0.646	4e-06		ILMN_1810560	P8	NA	0.569592	-0.812	3e-05	1.75564
	ILMN_1678919	YOD1	55432	1.56482	0.646	3.7e-05		ILMN_2096116	HSP90B1	7184	0.570777	-0.809	0.00053	1.752
	ILMN_1791097	RSBN1	54665	1.56482	0.646	5.4e-05		ILMN_2143795	MGC4677	NA	0.571966	-0.806	0	1.74836
	ILMN_3269405	HNRNPM	4670	1.56374	0.645	1.3e-05		ILMN_2056032	CD99	4267	0.573156	-0.803	0	1.74473
	ILMN_2115434	RAB32	10981	1.56266	0.644	5e-06		ILMN_1666503	DENND2A	27147	0.573554	-0.802	8e-06	1.74352
	ILMN_1674302	PPAT	5471	1.56266	0.644	4.5e-05		ILMN_2115125	CTGF	NA	0.574349	-0.8	0	1.7411
	ILMN_2108938	FNBP4	23360	1.56049	0.642	5e-06		ILMN_1803429	CD44	960	0.575146	-0.798	0	1.73869
	ILMN_2155172	BRIX1	55299	1.56049	0.642	2.3e-05		ILMN_1730622	EVL	51466	0.575146	-0.798	0	1.73869
	ILMN_1659047	HIST2H2AA3	NA	1.56049	0.642	0.048316		ILMN_1666894	CSPG4	1464	0.577943	-0.791	3e-06	1.73027
	ILMN_1673138	ZBTB33	10009	1.55941	0.641	5.2e-05		ILMN_1698732	PALLD	23022	0.578745	-0.789	0	1.72788
	ILMN_1769615	FLRT2	23768	1.55725	0.639	4e-06		ILMN_2084825	HBG2	3048	0.58156	-0.782	1.8e-05	1.71951
	ILMN_1721741	ATPBD1B	NA	1.55617	0.638	6e-06		ILMN_2404688	NUPR1	26471	0.58156	-0.782	0.00025	1.71951
	ILMN_1741957	RABEPK	10244	1.55509	0.637	9e-06		ILMN_1723625	MAP4K2	5871	0.581963	-0.781	0	1.71832
	ILMN_1744308	DHX33	56919	1.55509	0.637	3.8e-05		ILMN_1724994	COL4A2	1284	0.581963	-0.781	0.001798	1.71832
	ILMN_1731714	CREB5	9586	1.55509	0.637	8.5e-05		ILMN_1775170	MT1X	4501	0.582367	-0.78	0.010655	1.71713
	ILMN_1759154	PABPN1	8106	1.55401	0.636	2.1e-05		ILMN_1715508	NNMT	4837	0.583175	-0.778	6e-06	1.71475
	ILMN_1739847	EIF3D	8664	1.55186	0.634	3e-06		ILMN_1669032	PPIC	5480	0.583579	-0.777	2.3e-05	1.71356
	ILMN_1712896	FST	10468	1.55079	0.633	0.000183		ILMN_2049536	TRPV2	51393	0.586011	-0.771	0	1.70645
	ILMN_2323526	WAC	51322	1.54971	0.632	1e-06		ILMN_1736178	AEBP1	165	0.586418	-0.77	0.000882	1.70527
	ILMN_1798533	ZNF22	7570	1.54864	0.631	0.000127		ILMN_2367215	PRCP	5547	0.587638	-0.767	0	1.70173
	ILMN_2067709	TFB2M	64216	1.54757	0.63	0.000285		ILMN_1671565	RNASET2	8635	0.588046	-0.766	0	1.70055
	ILMN_1728984	PA2G4	5036	1.54542	0.628	0.000126		ILMN_1751161	COL7A1	1294	0.588046	-0.766	4.8e-05	1.70055
	ILMN_1739083	SIRT1	23411	1.54435	0.627	0.000224		ILMN_1789196	TPM2	7169	0.588453	-0.765	0	1.69937
	ILMN_1775677	TYSND1	219743	1.54328	0.626	1e-06		ILMN_2308849	MYADM	91663	0.588861	-0.764	1.9e-05	1.69819
	ILMN_1725862	USP3	9960	1.54328	0.626	2.6e-05		ILMN_1715401	MT1G	4495	0.58927	-0.763	2.1e-05	1.69702
	ILMN_1659725	EXOSC5	56915	1.54328	0.626	0.000127		ILMN_1791912	SIDT2	51092	0.589678	-0.762	0	1.69584
	ILMN_2331636	ACACA	31	1.54221	0.625	0.000161		ILMN_1707077	SORT1	6272	0.590087	-0.761	0	1.69466
	ILMN_1769757	C14ORF104	NA	1.54114	0.624	0.000248		ILMN_1682781	TEAD2	8463	0.590087	-0.761	0	1.69466
	ILMN_1703123	AXUD1	NA	1.54114	0.624	0.000352		ILMN_1669376	DRAM1	55332	0.590087	-0.761	0.000371	1.69466
	ILMN_3247906	RNF114	55905	1.54114	0.624	0.001374		ILMN_2406501	SOD2	6648	0.590087	-0.761	0.000395	1.69466
	ILMN_1677511	PTGS2	5743	1.53794	0.621	0.000517		ILMN_1744795	TBL1X	6907	0.591315	-0.758	1e-06	1.69114
	ILMN_1815043	MRPS2	51116	1.53688	0.62	3.8e-05		ILMN_1670899	FBN2	2201	0.591315	-0.758	5.4e-05	1.69114
	ILMN_1693014	CEBPB	1051	1.53688	0.62	0.000144		ILMN_1692398	CNTNAP1	8506	0.592136	-0.756	0.001332	1.6888
	ILMN_1737314	BCL6	604	1.53581	0.619	5e-06		ILMN_1698307	DBNL	28988	0.592546	-0.755	0	1.68763
	ILMN_1681590	LARP1	23367	1.53475	0.618	1.6e-05		ILMN_1674386	PITX1	5307	0.593368	-0.753	3.2e-05	1.68529
	ILMN_1676984	DDIT3	1649	1.53475	0.618	2.8e-05		ILMN_2129161	LRRC32	2615	0.595016	-0.749	4.6e-05	1.68063
	ILMN_1784436	KIAA1688	NA	1.53368	0.617	2.2e-05		ILMN_1663313	AMY1C	278	0.595428	-0.748	8e-06	1.67946
	ILMN_1729368	FZD8	8325	1.53262	0.616	1e-06		ILMN_1734231	DDOST	1650	0.595841	-0.747	0	1.6783
	ILMN_1660412	MGC27345	NA	1.53262	0.616	1e-06		ILMN_1727194	CALU	813	0.595841	-0.747	0.000107	1.6783
	ILMN_2248863	ZBTB38	253461	1.53262	0.616	1.8e-05		ILMN_1658709	LAMB1	3912	0.596668	-0.745	4.7e-05	1.67597
	ILMN_3247462	GLRX3	10539	1.53262	0.616	8.5e-05		ILMN_1755974	ALDOC	230	0.598325	-0.741	1e-05	1.67133
	ILMN_1704055	HSPC111	NA	1.53156	0.615	4e-06		ILMN_3235221	LOC644936	644936	0.598325	-0.741	0.000129	1.67133
	ILMN_1742332	KCTD12	115207	1.53156	0.615	1.5e-05		ILMN_2148459	B2M	567	0.598325	-0.741	0.003533	1.67133
	ILMN_3251629	EIF4A1	1973	1.53156	0.615	2.7e-05		ILMN_1793859	ALDH2	217	0.59957	-0.738	1e-06	1.66786
	ILMN_1679093	ZNF581	51545	1.5305	0.614	1e-06		ILMN_1670272	LRP10	26020	0.599986	-0.737	0	1.66671
	ILMN_1812940	TRMT1	55621	1.52944	0.613	1e-05		ILMN_1719316	TMED3	23423	0.602486	-0.731	0	1.65979
	ILMN_1736575	TRIM28	10155	1.52838	0.612	4.8e-05		ILMN_3273491	LOC100130332	NA	0.602904	-0.73	0.012045	1.65864
	ILMN_1660292	MRPS21	54460	1.52732	0.611	0		ILMN_2089977	FKBP9L	NA	0.60374	-0.728	1e-06	1.65634
	ILMN_1782247	KAT2A	2648	1.52732	0.611	1e-05		ILMN_1751607	FOSB	2354	0.604578	-0.726	1e-06	1.65405
	ILMN_1690252	ALKBH2	121642	1.52732	0.611	0.000137		ILMN_1800261	TUBA1B	10376	0.604997	-0.725	3e-06	1.6529
	ILMN_1760575	PTP4A1	7803	1.52626	0.61	0.00045		ILMN_1695880	LOX	4015	0.604997	-0.725	0.000109	1.6529
	ILMN_1663631	BANP	54971	1.52309	0.607	0		ILMN_1800733	MANBA	4126	0.605836	-0.723	9e-06	1.65061
	ILMN_1707312	NFIL3	4783	1.52309	0.607	6.4e-05		ILMN_1666057	REEP2	51308	0.606256	-0.722	1.2e-05	1.64947
	ILMN_1744665	EP300	2033	1.52203	0.606	0.000243		ILMN_2366041	ITM2C	81618	0.606677	-0.721	0.000109	1.64832
	ILMN_2147306	PNRC2	55629	1.52203	0.606	0.010761		ILMN_2388142	CD99L2	83692	0.606677	-0.721	0.000296	1.64832
	ILMN_1764362	LYAR	55646	1.52098	0.605	0.000179		ILMN_1785711	NEDD8	4738	0.606677	-0.721	0.001965	1.64832
	ILMN_1801383	SMG1	23049	1.51992	0.604	0.000957		ILMN_1732151	COL6A1	1291	0.607097	-0.72	8e-06	1.64718
	ILMN_1725105	EEF1E1	9521	1.51992	0.604	0.009565		ILMN_1785095	ATP6V0E2	155066	0.607097	-0.72	1.1e-05	1.64718
	ILMN_1762615	FAM175B	NA	1.51677	0.601	1e-06		ILMN_1676099	SPON2	10417	0.607097	-0.72	0.000121	1.64718
	ILMN_1701621	SCO2	9997	1.51467	0.599	0.002924		ILMN_2200836	HSPB7	27129	0.607518	-0.719	0	1.64604
	ILMN_3249501	ZNF697	90874	1.51362	0.598	5e-06		ILMN_2104830	ACP2	53	0.607518	-0.719	2e-06	1.64604
	ILMN_1806023	JUN	3725	1.51257	0.597	9e-06		ILMN_1652246	KIAA0363	NA	0.609627	-0.714	0.000766	1.64035
	ILMN_1666553	SLC25A19	60386	1.51152	0.596	8e-06		ILMN_1800958	ALS2CR4	NA	0.61005	-0.713	0.001137	1.63921
	ILMN_1654609	TIGA1	NA	1.51047	0.595	0.000373		ILMN_1797384	UROS	7390	0.610473	-0.712	0.000188	1.63807
	ILMN_1687978	PHLDA1	22822	1.50943	0.594	0		ILMN_1701731	AKR1B1	231	0.610473	-0.712	0.003737	1.63807
	ILMN_1736002	COPS5	10987	1.50943	0.594	3e-06		ILMN_1671703	ACTA2	59	0.610897	-0.711	0.001972	1.63694
	ILMN_1742577	GTPBP4	23560	1.50943	0.594	7e-06		ILMN_2136133	PABPC1	26986	0.610897	-0.711	0.007246	1.63694
	ILMN_2383306	GPATCH4	54865	1.50943	0.594	2.8e-05		ILMN_1782439	CNN3	1266	0.611744	-0.709	4e-06	1.63467
	ILMN_1663954	TH1L	NA	1.50943	0.594	0.000986		ILMN_1719972	PLXNA3	55558	0.612593	-0.707	0	1.63241
	ILMN_3247132	LOC730743	NA	1.50733	0.592	0.00016		ILMN_3230435	LOC729086	729086	0.612593	-0.707	3e-06	1.63241
	ILMN_1767253	RRP12	23223	1.50629	0.591	2.5e-05		ILMN_1654629	TMEM175	84286	0.614719	-0.702	5.2e-05	1.62676
	ILMN_1764709	MAFB	9935	1.50525	0.59	2.6e-05		ILMN_1799026	PCDH18	54510	0.615146	-0.701	0.00031	1.62563
	ILMN_1805271	ZNF721	170960	1.50316	0.588	0.000414		ILMN_1806692	HEXB	3074	0.615572	-0.7	3.6e-05	1.6245
	ILMN_3188984	C20ORF199	NA	1.50212	0.587	0.00093		ILMN_1753468	CD63	967	0.615999	-0.699	2.3e-05	1.62338
	ILMN_1729051	MSH6	2956	1.50004	0.585	3.9e-05		ILMN_1811238	ALPK2	115701	0.616854	-0.697	1.4e-05	1.62113
	ILMN_3236259	PPIAL4A	653505	1.50004	0.585	0.008724		ILMN_1729453	TSPAN9	10867	0.618566	-0.693	1.1e-05	1.61664
	ILMN_2287653	PLAG1	5324	1.499	0.584	0.000181		ILMN_1740900	BMP4	652	0.618566	-0.693	1.6e-05	1.61664
	ILMN_1695576	MRPL24	79590	1.49796	0.583	0.00219		ILMN_1768394	ARPC5	10092	0.619424	-0.691	4.2e-05	1.6144
	ILMN_1673962	NUP205	23165	1.49692	0.582	2e-05		ILMN_3241758	POTEF	728378	0.619424	-0.691	0.000102	1.6144
	ILMN_1795922	CCDC16	NA	1.49692	0.582	0.000288		ILMN_1706643	COL6A3	1293	0.619424	-0.691	0.000342	1.6144
	ILMN_1759991	MGC3731	NA	1.49278	0.578	5e-06		ILMN_2048607	ANKRD9	122416	0.620284	-0.689	0	1.61217
	ILMN_1817255	HS.92308	NA	1.49278	0.578	0.000159		ILMN_3307791	FAM69A	NA	0.620714	-0.688	0	1.61105
	ILMN_1792681	CCDC86	79080	1.49174	0.577	6e-06		ILMN_1809477	CARHSP1	23589	0.620714	-0.688	0.000576	1.61105
	ILMN_1773760	PAICS	10606	1.49071	0.576	0.000117		ILMN_1726327	AMY1B	277	0.621144	-0.687	9e-06	1.60993
	ILMN_1722838	MRPL46	26589	1.48968	0.575	1e-06		ILMN_2347145	DCN	1634	0.621575	-0.686	0.000226	1.60882
	ILMN_1726391	MRPL39	54148	1.48968	0.575	4e-06		ILMN_1704961	ACTG1	71	0.621575	-0.686	0.000317	1.60882
	ILMN_2401155	PUM1	9698	1.48968	0.575	4.8e-05		ILMN_1744929	PTGER1	5731	0.622006	-0.685	0.005998	1.6077
	ILMN_2356068	CDC2L5	NA	1.48968	0.575	0.000189		ILMN_1686116	THBS1	7057	0.622437	-0.684	0.019737	1.60659
	ILMN_1732923	SIPA1L2	57568	1.48968	0.575	0.000193		ILMN_1806733	COL18A1	80781	0.622869	-0.683	4e-06	1.60547
	ILMN_3243297	LOC641814	NA	1.48865	0.574	0.001168		ILMN_1744604	CYBA	1535	0.623733	-0.681	1.6e-05	1.60325
	ILMN_1751963	ZCWPW1	55063	1.48761	0.573	1.3e-05		ILMN_1673352	IFITM2	10581	0.624165	-0.68	0.009675	1.60214
	ILMN_1794230	SCAND1	51282	1.48658	0.572	0.000199		ILMN_1734190	TCEAL3	85012	0.624598	-0.679	0	1.60103
	ILMN_2391141	UBE3A	7337	1.48658	0.572	0.000759		ILMN_1662129	RCN2	5955	0.624598	-0.679	7.3e-05	1.60103
	ILMN_1705679	SAFB2	9667	1.48555	0.571	2e-06		ILMN_1811921	CSRP1	1465	0.625031	-0.678	5.1e-05	1.59992
	ILMN_1670817	GRPEL1	80273	1.48555	0.571	4.1e-05		ILMN_1695946	TRNP1	388610	0.625464	-0.677	5e-06	1.59881
	ILMN_1764851	TP53RK	112858	1.48555	0.571	5.4e-05		ILMN_1659027	SLC2A1	6513	0.625464	-0.677	0.00026	1.59881
	ILMN_1746686	POLR1C	9533	1.48349	0.569	1.2e-05		ILMN_1695423	CD9	928	0.625898	-0.676	1.3e-05	1.5977
	ILMN_1723895	GTF3C5	9328	1.48349	0.569	5.9e-05		ILMN_1803392	TAX1BP3	30851	0.626332	-0.675	2e-06	1.5966
	ILMN_1801869	WDR75	84128	1.48349	0.569	0.000737		ILMN_1665887	WDR61	80349	0.626332	-0.675	9e-06	1.5966
	ILMN_1795007	C2ORF47	NA	1.48247	0.568	2.8e-05		ILMN_1771333	CD47	961	0.626332	-0.675	0.000867	1.5966
	ILMN_1782385	POLR2A	5430	1.48144	0.567	6.9e-05		ILMN_1692535	DPP4	1803	0.626767	-0.674	0.000127	1.59549
	ILMN_2374293	DYRK1A	1859	1.48144	0.567	0.000573		ILMN_1656057	PLAU	5328	0.628071	-0.671	0.000195	1.59218
	ILMN_1787628	NOP56	10528	1.48144	0.567	0.000907		ILMN_1783909	COL6A2	1292	0.628507	-0.67	0.000218	1.59107
	ILMN_1689123	CCNK	8812	1.48041	0.566	3.6e-05		ILMN_1774828	VEZT	55591	0.628942	-0.669	5e-06	1.58997
	ILMN_1805658	LTV1	84946	1.47939	0.565	9e-05		ILMN_2230892	IL10RB	3588	0.629379	-0.668	0	1.58887
	ILMN_2181191	TPI1	7167	1.47939	0.565	0.000838		ILMN_1676213	SRPX2	27286	0.629379	-0.668	0	1.58887
	ILMN_1728305	PUM2	23369	1.47836	0.564	6e-06		ILMN_1725387	TMEM200A	114801	0.629379	-0.668	1.4e-05	1.58887
	ILMN_1812776	FBXO28	23219	1.47836	0.564	0.008401		ILMN_1732809	ALG9	79796	0.629815	-0.667	2e-06	1.58777
	ILMN_1768973	HIST2H2AC	NA	1.47836	0.564	0.017726		ILMN_1769546	RIN2	54453	0.629815	-0.667	7e-06	1.58777
	ILMN_1766222	LARP4B	23185	1.47734	0.563	6e-06		ILMN_1712545	S100A3	6274	0.629815	-0.667	0.006629	1.58777
	ILMN_1690122	CRKL	1399	1.47734	0.563	6.8e-05		ILMN_1662174	ORMDL3	94103	0.631564	-0.663	8e-05	1.58337
	ILMN_1759787	THBD	7056	1.47734	0.563	0.000194		ILMN_1695763	PDIA5	10954	0.632001	-0.662	2e-06	1.58227
	ILMN_1788961	PPP2R2A	5520	1.47631	0.562	0.001045		ILMN_1705442	CMTM3	123920	0.63244	-0.661	0.000219	1.58118
	ILMN_1779353	PUS7	54517	1.47529	0.561	3.1e-05		ILMN_1698706	NID2	22795	0.633756	-0.658	8e-06	1.57789
	ILMN_1708537	RBPJ	3516	1.47529	0.561	0.000129		ILMN_1737146	TRAM1	23471	0.633756	-0.658	1.1e-05	1.57789
	ILMN_1719985	FEM1A	55527	1.47427	0.56	3.8e-05		ILMN_1744381	SERPINE1	5054	0.633756	-0.658	0.014792	1.57789
	ILMN_1694711	MAD2L1BP	9587	1.47223	0.558	0.000103		ILMN_2354381	PON2	5445	0.634196	-0.657	0	1.5768
	ILMN_1754839	DHX15	1665	1.47223	0.558	0.000123		ILMN_1802894	VKORC1L1	154807	0.634196	-0.657	3.5e-05	1.5768
	ILMN_2221076	C17ORF85	NA	1.47121	0.557	1.3e-05		ILMN_3245559	CDK2AP1	8099	0.634635	-0.656	0.000109	1.57571
	ILMN_1688722	IL13RA2	3598	1.47121	0.557	0.003593		ILMN_3237946	LOC100134134	NA	0.634635	-0.656	0.000425	1.57571
	ILMN_3192411	C10ORF75	NA	1.47019	0.556	4e-06		ILMN_1732060	ARHGAP1	392	0.634635	-0.656	0.000896	1.57571
	ILMN_3246409	HNRNPH1	3187	1.47019	0.556	0.000969		ILMN_2364357	RPS6KB2	6199	0.635076	-0.655	0.003093	1.57462
	ILMN_1681542	HIST1H4E	NA	1.46917	0.555	2.4e-05		ILMN_1730670	FSTL3	10272	0.635516	-0.654	5.4e-05	1.57353
	ILMN_1656111	MYLIP	29116	1.46917	0.555	0.002899		ILMN_1776953	MYL9	10398	0.635516	-0.654	0.000874	1.57353
	ILMN_1802205	RHOB	388	1.46815	0.554	8e-05		ILMN_2082130	C1ORF123	NA	0.635957	-0.653	3e-06	1.57243
	ILMN_1795836	C21ORF57	NA	1.46815	0.554	0.001001		ILMN_1719661	SEPX1	NA	0.635957	-0.653	1.1e-05	1.57243
	ILMN_2095840	MYST3	NA	1.46612	0.552	4.7e-05		ILMN_2252309	DPP7	29952	0.635957	-0.653	0.001009	1.57243
	ILMN_1713764	LOC440928	NA	1.4651	0.551	6e-06		ILMN_1657697	SAR1A	56681	0.636397	-0.652	7e-06	1.57134
	ILMN_1745271	EXOSC4	54512	1.4651	0.551	3.7e-05		ILMN_1716547	NAGK	55577	0.63728	-0.65	1.3e-05	1.56917
	ILMN_1706553	SMG7	9887	1.4651	0.551	0.000289		ILMN_2282641	TBXAS1	6916	0.637722	-0.649	2e-05	1.56808
	ILMN_1768662	UCK2	7371	1.4651	0.551	0.000308		ILMN_3307892	PARVA	55742	0.638164	-0.648	1e-06	1.56699
	ILMN_3260345	AGFG1	3267	1.4651	0.551	0.000513		ILMN_1763080	QARS	NA	0.638164	-0.648	9.2e-05	1.56699
	ILMN_1703301	LOC653479	NA	1.4651	0.551	0.001096		ILMN_1773006	FABP4	2167	0.638164	-0.648	0.000175	1.56699
	ILMN_1733696	IMP3	55272	1.46409	0.55	3e-06		ILMN_1730054	GSTT1	2952	0.638607	-0.647	7e-06	1.56591
	ILMN_3251708	LOC728946	NA	1.46409	0.55	0.001393		ILMN_1776188	MAP1LC3A	84557	0.63905	-0.646	0.000759	1.56482
	ILMN_1716445	LOC727761	NA	1.46409	0.55	0.001599		ILMN_2305225	NDRG4	65009	0.639493	-0.645	0	1.56374
	ILMN_1803846	EIF1	10209	1.46307	0.549	8.5e-05		ILMN_1808404	RHBDF1	64285	0.64038	-0.643	1e-06	1.56157
	ILMN_1810533	SLC6A15	55117	1.46307	0.549	0.000266		ILMN_1821517	HS.508682	NA	0.64038	-0.643	1.7e-05	1.56157
	ILMN_2369403	PALM2	NA	1.46307	0.549	0.000509		ILMN_1679838	WBP5	NA	0.64038	-0.643	0.004109	1.56157
	ILMN_1730077	RPUSD2	27079	1.46206	0.548	1.4e-05		ILMN_1726030	GPX7	2882	0.642158	-0.639	0.002676	1.55725
	ILMN_1766359	GATAD2B	57459	1.46206	0.548	0.000124		ILMN_1729237	CYB5R1	51706	0.643495	-0.636	0.001193	1.55401
	ILMN_2115696	USP42	84132	1.46104	0.547	4.8e-05		ILMN_1667711	HRASLS3	NA	0.643495	-0.636	0.002165	1.55401
	ILMN_3248701	LOC644350	NA	1.46104	0.547	0.005279		ILMN_1719303	P4HB	5034	0.644834	-0.633	1.5e-05	1.55079
	ILMN_1685369	SLU7	10569	1.46003	0.546	1.3e-05		ILMN_1764230	GNPTG	84572	0.645281	-0.632	0.00018	1.54971
	ILMN_1679209	HSPA9	3313	1.46003	0.546	2e-05		ILMN_1796678	HBG1	3047	0.645281	-0.632	0.001287	1.54971
	ILMN_1668996	C1QBP	708	1.46003	0.546	4.9e-05		ILMN_1680626	PDIA6	10130	0.645729	-0.631	6e-06	1.54864
	ILMN_1750409	RAB9A	9367	1.46003	0.546	0.000724		ILMN_1667748	ANKRD33	341405	0.645729	-0.631	0.000136	1.54864
	ILMN_1802753	TSSC4	10078	1.45801	0.544	5.3e-05		ILMN_1809467	VAMP5	10791	0.646176	-0.63	0.022149	1.54757
	ILMN_1764891	ZNF384	171017	1.45801	0.544	0.000152		ILMN_2381899	OPTN	10133	0.647073	-0.628	0.001433	1.54542
	ILMN_1733562	TFB1M	51106	1.45801	0.544	0.000346		ILMN_1806787	CSDC2	27254	0.647521	-0.627	0	1.54435
	ILMN_1721842	RYBP	23429	1.45801	0.544	0.003505		ILMN_1812392	TMSB10	9168	0.647521	-0.627	1.6e-05	1.54435
	ILMN_1716272	KBTBD8	84541	1.45599	0.542	1.5e-05		ILMN_1677038	FLJ21986	NA	0.647521	-0.627	0.000155	1.54435
	ILMN_2087646	HLX	3142	1.45599	0.542	0.000283		ILMN_1709795	RAC2	5880	0.648869	-0.624	6e-06	1.54114
	ILMN_1713189	C12ORF41	NA	1.45498	0.541	3.7e-05		ILMN_2312194	CYB5A	1528	0.649319	-0.623	4.5e-05	1.54007
	ILMN_1681780	MKX	283078	1.45498	0.541	0.000469		ILMN_1703622	PPIB	5479	0.649319	-0.623	0.000536	1.54007
	ILMN_1772131	IL1R2	7850	1.45498	0.541	0.000595		ILMN_2372136	P4HTM	54681	0.649769	-0.622	0	1.53901
	ILMN_2326509	CASP1	834	1.45498	0.541	0.046855		ILMN_1758895	CTSK	1513	0.649769	-0.622	5.6e-05	1.53901
	ILMN_1727692	TRIT1	54802	1.45297	0.539	0.000242		ILMN_1671928	PROS1	5627	0.649769	-0.622	9.9e-05	1.53901
	ILMN_1738657	SATB2	23314	1.45196	0.538	0.000335		ILMN_1749213	SDF2L1	23753	0.649769	-0.622	0.001606	1.53901
	ILMN_1742238	SET	6418	1.44995	0.536	8e-06		ILMN_2354547	TUSC3	7991	0.65022	-0.621	2e-06	1.53794
	ILMN_1708619	SEH1L	81929	1.44995	0.536	0.000133		ILMN_1770922	TMEM45A	55076	0.650671	-0.62	0.000226	1.53688
	ILMN_1673738	LOC646483	NA	1.44995	0.536	0.003282		ILMN_3243471	CNPY2	10330	0.651122	-0.619	3e-06	1.53581
	ILMN_3270641	HNRNPH3	3189	1.44995	0.536	0.006882		ILMN_2201678	FSTL1	11167	0.652025	-0.617	0.001687	1.53368
	ILMN_1701749	UQCRFS1	7386	1.44894	0.535	1e-06		ILMN_1708143	FAM127A	NA	0.652478	-0.616	0.002144	1.53262
	ILMN_1770936	COQ5	84274	1.44693	0.533	1.3e-05		ILMN_1767470	SCPEP1	59342	0.65293	-0.615	6.9e-05	1.53156
	ILMN_1679382	CCT2	10576	1.44693	0.533	8.6e-05		ILMN_1710209	MFSD6	54842	0.65293	-0.615	0.000134	1.53156
	ILMN_1676905	TIGD7	91151	1.44593	0.532	4.6e-05		ILMN_1702636	TUBB6	84617	0.65293	-0.615	0.000185	1.53156
	ILMN_1717799	PRKCE	5581	1.44593	0.532	0.000174		ILMN_1675448	ZFP36L1	677	0.653383	-0.614	4.7e-05	1.5305
	ILMN_1757317	LARS	NA	1.44493	0.531	0.0004		ILMN_1719286	CTSA	5476	0.653383	-0.614	7.3e-05	1.5305
	ILMN_1754076	CACNA2D3	55799	1.44393	0.53	4.8e-05		ILMN_1684554	COL16A1	1307	0.653836	-0.613	4e-06	1.52944
	ILMN_1812580	YDJC	150223	1.44393	0.53	0.000179		ILMN_1679401	TRPM4	54795	0.654289	-0.612	1.1e-05	1.52838
	ILMN_1681703	FOXO3	2309	1.44393	0.53	0.000267		ILMN_1681754	GGH	8836	0.654289	-0.612	0.00035	1.52838
	ILMN_3241303	LOC728255	NA	1.44393	0.53	0.000436		ILMN_1716678	NPC2	10577	0.654743	-0.611	3e-06	1.52732
	ILMN_1797341	ARID1A	8289	1.44393	0.53	0.001193		ILMN_2342437	KLHL5	51088	0.654743	-0.611	0.001214	1.52732
	ILMN_2075051	PGS1	9489	1.44293	0.529	5.5e-05		ILMN_2149164	SFRP1	6422	0.655651	-0.609	0.000133	1.5252
	ILMN_1780699	THAP11	57215	1.44293	0.529	5.7e-05		ILMN_1685441	ASAP3	55616	0.656106	-0.608	1.6e-05	1.52414
	ILMN_2045729	WDR12	55759	1.44293	0.529	0.000426		ILMN_1769575	JAM3	83700	0.656106	-0.608	5.1e-05	1.52414
	ILMN_1772959	PDCD7	10081	1.44193	0.528	0.000572		ILMN_1696643	TLN1	7094	0.656561	-0.607	7e-06	1.52309
	ILMN_1685480	TARS	NA	1.44193	0.528	0.001311		ILMN_1800659	PGM1	5236	0.657016	-0.606	8e-06	1.52203
	ILMN_1702389	ZC3H3	23144	1.44093	0.527	6.8e-05		ILMN_1697469	SFRS6	NA	0.657016	-0.606	3.9e-05	1.52203
	ILMN_1694219	ARIH1	25820	1.43993	0.526	5.8e-05		ILMN_1798288	MOBKL2C	NA	0.657471	-0.605	0.003259	1.52098
	ILMN_2327090	MAEA	10296	1.43993	0.526	0.000701		ILMN_1702105	EFS	10278	0.657927	-0.604	3e-06	1.51992
	ILMN_1728779	NGLY1	55768	1.43993	0.526	0.001292		ILMN_1777296	ACTB	60	0.657927	-0.604	0.000626	1.51992
	ILMN_1699676	C14ORF147	NA	1.43893	0.525	1e-05		ILMN_2063584	CLIC4	25932	0.657927	-0.604	0.000867	1.51992
	ILMN_3244583	NCRNA00219	NA	1.43794	0.524	0.001606		ILMN_1653200	SLC22A17	51310	0.657927	-0.604	0.001786	1.51992
	ILMN_1674399	ZNF143	7702	1.43694	0.523	7.5e-05		ILMN_1674620	SGCE	8910	0.658384	-0.603	1.6e-05	1.51887
	ILMN_1654552	MRPS31	10240	1.43594	0.522	0.000115		ILMN_1743103	SH3PXD2A	9644	0.658384	-0.603	0.003574	1.51887
	ILMN_2184640	NOLC1	9221	1.43594	0.522	0.00025		ILMN_1779171	SGSM2	9905	0.65884	-0.602	1.7e-05	1.51782
	ILMN_1670875	PPM1D	8493	1.43594	0.522	0.000314		ILMN_1792679	ITGA5	3678	0.65884	-0.602	0.001303	1.51782
	ILMN_1692651	PHB	5245	1.43594	0.522	0.001798		ILMN_1657884	NME2	4831	0.659297	-0.601	0.000763	1.51677
	ILMN_1814156	PSMB7	5695	1.43495	0.521	4e-06		ILMN_1701032	TFPI	7035	0.659754	-0.6	0.000284	1.51572
	ILMN_1765520	MTIF2	4528	1.43495	0.521	0.000359		ILMN_2201596	CYTL1	54360	0.659754	-0.6	0.018524	1.51572
	ILMN_1753639	MTAP	4507	1.43495	0.521	0.000368		ILMN_1725791	PTPLA	NA	0.660211	-0.599	8e-06	1.51467
	ILMN_1689704	TMEM5	NA	1.43495	0.521	0.000872		ILMN_1712684	FAM20C	56975	0.660669	-0.598	0.000433	1.51362
	ILMN_3226807	NHP2	55651	1.43396	0.52	0.000395		ILMN_1697409	TNFRSF14	8764	0.660669	-0.598	0.003017	1.51362
	ILMN_1715179	SNRPA1	6627	1.43396	0.52	0.000847		ILMN_2370976	FER1L3	NA	0.661127	-0.597	0.000102	1.51257
	ILMN_1792978	HAS2	3037	1.43396	0.52	0.005148		ILMN_1657153	ACTR3	10096	0.661127	-0.597	0.0002	1.51257
	ILMN_1798602	PCF11	51585	1.43296	0.519	3.2e-05		ILMN_1759023	WFS1	7466	0.661586	-0.596	3e-05	1.51152
	ILMN_2044617	MTERFD1	NA	1.43296	0.519	0.000359		ILMN_1802411	ITGA1	3672	0.661586	-0.596	0.022126	1.51152
	ILMN_1655734	RPF1	80135	1.43197	0.518	0.000767		ILMN_3242330	FAM65C	NA	0.662045	-0.595	0.002899	1.51047
	ILMN_3237291	LOC644124	NA	1.43197	0.518	0.000964		ILMN_1652631	GLIPR2	152007	0.662045	-0.595	0.006237	1.51047
	ILMN_1678808	KIAA0831	NA	1.43197	0.518	0.001382		ILMN_3302919	MYOF	26509	0.662504	-0.594	4e-06	1.50943
	ILMN_1766613	ZNF121	7675	1.42999	0.516	4.6e-05		ILMN_2364674	TRPT1	83707	0.662504	-0.594	2.5e-05	1.50943
	ILMN_1743456	ZCCHC14	23174	1.42999	0.516	0.00012		ILMN_2378868	SFRS5	NA	0.662963	-0.593	1.6e-05	1.50838
	ILMN_1659936	PPP1R15A	23645	1.42999	0.516	0.001168		ILMN_1693421	RPN2	6185	0.662963	-0.593	2.9e-05	1.50838
	ILMN_1655497	EIF4B	1975	1.42999	0.516	0.011529		ILMN_1658926	NOTCH3	4854	0.662963	-0.593	0.005644	1.50838
	ILMN_1807596	UBAP1	51271	1.42899	0.515	0.000737		ILMN_3233179	LOC728969	NA	0.663883	-0.591	9.8e-05	1.50629
	ILMN_2121437	NCL	4691	1.42899	0.515	0.001519		ILMN_1771599	PLOD2	5352	0.664343	-0.59	0.000517	1.50525
	ILMN_3176090	LOC100130919	NA	1.42899	0.515	0.0064		ILMN_1666385	CALM3	808	0.664804	-0.589	2.2e-05	1.5042
	ILMN_2162799	AHR	196	1.428	0.514	9.6e-05		ILMN_1657632	ZMYM6	9204	0.665726	-0.587	9.2e-05	1.50212
	ILMN_1702592	WDR73	84942	1.428	0.514	0.001292		ILMN_1740441	CYB5R3	1727	0.665726	-0.587	0.002088	1.50212
	ILMN_1733931	PDCD6	10016	1.42701	0.513	1e-05		ILMN_2186482	TMED7	51014	0.666187	-0.586	0.00021	1.50108
	ILMN_1750051	FLJ39827	NA	1.42701	0.513	0.000104		ILMN_1802027	MGST2	4258	0.667112	-0.584	1e-06	1.499
	ILMN_1788462	AMD1	262	1.42701	0.513	0.000199		ILMN_1710482	APLP2	334	0.667574	-0.583	3.7e-05	1.49796
	ILMN_2197247	POLR3A	11128	1.42701	0.513	0.000665		ILMN_1773935	TMEM165	55858	0.667574	-0.583	5e-05	1.49796
	ILMN_1747771	LOC730744	NA	1.42701	0.513	0.000877		ILMN_2374340	PLAUR	5329	0.667574	-0.583	0.000174	1.49796
	ILMN_1718706	ERAL1	26284	1.42603	0.512	1.4e-05		ILMN_2179083	LOXL4	84171	0.667574	-0.583	0.000766	1.49796
	ILMN_2343105	LIPT1	51601	1.42603	0.512	0.000179		ILMN_2127605	LRP3	4037	0.667574	-0.583	0.000922	1.49796
	ILMN_1726064	PAK1IP1	55003	1.42603	0.512	0.000303		ILMN_2058795	PGCP	NA	0.668037	-0.582	0.000117	1.49692
	ILMN_1801156	RLF	6018	1.42603	0.512	0.000641		ILMN_1773389	PLTP	5360	0.668037	-0.582	0.015794	1.49692
	ILMN_2269564	ARID4B	51742	1.42603	0.512	0.001639		ILMN_1747281	EVI5L	115704	0.6685	-0.581	0.000124	1.49589
	ILMN_1736597	TKT	7086	1.42603	0.512	0.002602		ILMN_2313901	PAM	5066	0.669428	-0.579	2.2e-05	1.49381
	ILMN_1776674	SAC3D1	29901	1.42504	0.511	0.000136		ILMN_1716913	TRAPPC1	58485	0.669428	-0.579	8.3e-05	1.49381
	ILMN_1714108	TP53INP1	94241	1.42504	0.511	0.000869		ILMN_1713636	S100A6	6277	0.669428	-0.579	0.001786	1.49381
	ILMN_1719611	CCT6A	908	1.42405	0.51	0.00527		ILMN_1735347	MCEE	84693	0.669892	-0.578	0.002305	1.49278
	ILMN_1668185	ZNF282	8427	1.42306	0.509	0.000214		ILMN_1760778	ENG	2022	0.670356	-0.577	9e-05	1.49174
	ILMN_1802611	SPEN	23013	1.42306	0.509	0.000457		ILMN_1712305	CYBRD1	79901	0.670356	-0.577	0.000358	1.49174
	ILMN_3281599	LOC642741	NA	1.42306	0.509	0.007134		ILMN_1730816	GPR162	27239	0.670821	-0.576	3.3e-05	1.49071
	ILMN_1736441	PDXP	57026	1.42109	0.507	5.4e-05		ILMN_1656386	SEC24D	9871	0.671286	-0.575	0.001303	1.48968
	ILMN_1730082	RPUSD4	84881	1.42109	0.507	6.7e-05		ILMN_3236858	NYNRIN	57523	0.671752	-0.574	1.6e-05	1.48865
	ILMN_2400030	PTPN2	5771	1.42109	0.507	0.001274		ILMN_1696537	DDIT4L	115265	0.671752	-0.574	3.6e-05	1.48865
	ILMN_1707484	GEMIN6	79833	1.42109	0.507	0.002083		ILMN_1664464	PTGDS	5730	0.671752	-0.574	4.4e-05	1.48865
	ILMN_3212833	LOC728139	NA	1.42109	0.507	0.009864		ILMN_1667418	LOC283953	NA	0.671752	-0.574	0.013825	1.48865
	ILMN_1706706	WDR68	NA	1.42011	0.506	0.000442		ILMN_2146418	CRIM1	51232	0.672218	-0.573	0.001186	1.48761
	ILMN_1794132	NDUFS8	4728	1.41912	0.505	0.00196		ILMN_1689908	ANKRD13A	88455	0.672684	-0.572	5.8e-05	1.48658
	ILMN_1686805	CRK	1398	1.41912	0.505	0.009634		ILMN_1781691	TRAK2	66008	0.672684	-0.572	0.000779	1.48658
	ILMN_2192683	DHX37	57647	1.41814	0.504	0.000154		ILMN_1702861	SGCD	6444	0.67315	-0.571	0.000176	1.48555
	ILMN_1662954	CCT7	10574	1.41716	0.503	0.00019		ILMN_1709486	SRPX	8406	0.67315	-0.571	0.004168	1.48555
	ILMN_1769902	HSPBP1	23640	1.41716	0.503	0.000435		ILMN_1723978	LGALS1	3956	0.674084	-0.569	6e-06	1.48349
	ILMN_1746138	RLTPR	NA	1.41618	0.502	2.2e-05		ILMN_1773307	NAP1L5	266812	0.674084	-0.569	7e-06	1.48349
	ILMN_3235517	ZNF777	27153	1.41618	0.502	5.9e-05		ILMN_1811104	KTELC1	NA	0.674551	-0.568	3.1e-05	1.48247
	ILMN_1654357	ZNF24	7572	1.41618	0.502	0.000133		ILMN_3236381	LOC727882	NA	0.675019	-0.567	0.000849	1.48144
	ILMN_1745806	PEMT	10400	1.41519	0.501	0.000175		ILMN_1653429	SLC35A3	23443	0.675955	-0.565	6.8e-05	1.47939
	ILMN_1742250	CCNH	902	1.41519	0.501	0.000364		ILMN_1696407	SFRS2	NA	0.676424	-0.564	1e-06	1.47836
	ILMN_1699737	TRAP1	10131	1.41519	0.501	0.000465		ILMN_1786139	VKORC1	79001	0.676424	-0.564	0.00031	1.47836
	ILMN_1662049	AGPAT5	55326	1.41519	0.501	0.000477		ILMN_1703433	PLSCR3	57048	0.676893	-0.563	2e-06	1.47734
	ILMN_2343624	METTL13	NA	1.41519	0.501	0.000571		ILMN_1791226	NXN	64359	0.676893	-0.563	2.5e-05	1.47734
	ILMN_2390821	THOC2	57187	1.41421	0.5	0.007417		ILMN_1787345	FKBP11	51303	0.676893	-0.563	9.8e-05	1.47734
	ILMN_1704154	TNFRSF19	55504	1.41225	0.498	5.2e-05		ILMN_1719627	SLC27A3	11000	0.676893	-0.563	0.000896	1.47734
	ILMN_1670807	FAM84B	NA	1.41225	0.498	6.9e-05		ILMN_1651557	KDELC2	NA	0.676893	-0.563	0.009841	1.47734
	ILMN_1787705	ATP6V1B2	526	1.41225	0.498	0.000227		ILMN_1796755	ITGB5	3693	0.677832	-0.561	0.000233	1.47529
	ILMN_1737252	NRG1	3084	1.41225	0.498	0.00146		ILMN_2404065	APP	351	0.677832	-0.561	0.003863	1.47529
	ILMN_2222992	ETF1	2107	1.41225	0.498	0.001621		ILMN_2045994	SEPW1	NA	0.678302	-0.56	3.9e-05	1.47427
	ILMN_1733863	FAM100A	NA	1.41225	0.498	0.001824		ILMN_1735827	NISCH	11188	0.678302	-0.56	0.000139	1.47427
	ILMN_2389347	NR3C1	2908	1.41128	0.497	0.000322		ILMN_1779034	NADSYN1	55191	0.678773	-0.559	5e-06	1.47325
	ILMN_1691611	LOC645436	NA	1.40932	0.495	0.011829		ILMN_1723884	ARF4	378	0.678773	-0.559	0.000283	1.47325
	ILMN_1881081	HS.571151	NA	1.40834	0.494	0.000133		ILMN_1812031	PALM	5064	0.679243	-0.558	0.000731	1.47223
	ILMN_2209260	KRTAP1-3	81850	1.40834	0.494	0.000149		ILMN_1744517	GNS	2799	0.679714	-0.557	4e-06	1.47121
	ILMN_1683204	GMEB2	26205	1.40834	0.494	0.000175		ILMN_1672504	PDXK	8566	0.679714	-0.557	7e-06	1.47121
	ILMN_2357809	G3BP1	10146	1.40834	0.494	0.000447		ILMN_1724250	GRN	2896	0.679714	-0.557	0.000434	1.47121
	ILMN_1793724	C3ORF31	NA	1.40834	0.494	0.000536		ILMN_2054607	CYP4V2	285440	0.679714	-0.557	0.000821	1.47121
	ILMN_2408400	NSUN5	55695	1.40834	0.494	0.000606		ILMN_2384241	TGFBR2	7048	0.680657	-0.555	0.000598	1.46917
	ILMN_2172174	NP	NA	1.40834	0.494	0.001551		ILMN_1808707	FSCN1	6624	0.680657	-0.555	0.001385	1.46917
	ILMN_1785732	TNFAIP6	7130	1.40737	0.493	0.000197		ILMN_2363658	PXDN	7837	0.680657	-0.555	0.00164	1.46917
	ILMN_1729748	PEF1	553115	1.40737	0.493	0.019134		ILMN_1745471	IRF9	10379	0.681129	-0.554	2.5e-05	1.46815
	ILMN_1735548	HIVEP1	3096	1.40639	0.492	8.3e-05		ILMN_1733453	LOC284988	NA	0.681601	-0.553	2.6e-05	1.46713
	ILMN_1655684	SARS2	54938	1.40639	0.492	0.000139		ILMN_1692754	TMEM49	NA	0.681601	-0.553	0.000373	1.46713
	ILMN_1757406	HIST1H1C	NA	1.40639	0.492	0.044354		ILMN_1702501	RPS6KA2	6196	0.681601	-0.553	0.000433	1.46713
	ILMN_1805996	SIN3A	25942	1.40444	0.49	6.4e-05		ILMN_1687035	ADAMTSL4	54507	0.682074	-0.552	1.3e-05	1.46612
	ILMN_1759184	C19ORF48	NA	1.40444	0.49	0.000127		ILMN_1655876	TMEM159	57146	0.682074	-0.552	2e-05	1.46612
	ILMN_1703743	AATF	26574	1.40444	0.49	0.000216		ILMN_2184184	ANXA1	301	0.682074	-0.552	6.4e-05	1.46612
	ILMN_2179397	TATDN1	83940	1.40444	0.49	0.001166		ILMN_1672611	CDH11	1009	0.682074	-0.552	0.00529	1.46612
	ILMN_3219455	LOC644745	NA	1.40444	0.49	0.005904		ILMN_1749109	PSAP	5660	0.682547	-0.551	1.2e-05	1.4651
	ILMN_1793203	SMCR7L	NA	1.40347	0.489	0.000185		ILMN_1781983	AP1B1	162	0.682547	-0.551	0.00021	1.4651
	ILMN_2405031	TRIM24	8805	1.40347	0.489	0.000192		ILMN_1735680	TMEM30A	55754	0.682547	-0.551	0.004181	1.4651
	ILMN_1681304	PAN3	255967	1.4025	0.488	6e-05		ILMN_1693310	ITFG1	81533	0.68302	-0.55	1.2e-05	1.46409
	ILMN_1651872	UBIAD1	29914	1.4025	0.488	0.000219		ILMN_1760688	SAMD14	201191	0.68302	-0.55	1.7e-05	1.46409
	ILMN_1706238	CSE1L	1434	1.4025	0.488	0.002518		ILMN_1665243	FKBP14	55033	0.68302	-0.55	0.000347	1.46409
	ILMN_1666280	COX11	1353	1.40153	0.487	0.000801		ILMN_2195482	CACNB3	784	0.683494	-0.549	0.000184	1.46307
	ILMN_2137066	ZNF7	7553	1.40153	0.487	0.003036		ILMN_2372082	SNRPN	6638	0.683494	-0.549	0.000285	1.46307
	ILMN_1742569	PAPD1	NA	1.40056	0.486	6.4e-05		ILMN_2049766	NFE2L3	9603	0.683968	-0.548	0.003366	1.46206
	ILMN_3215206	LOC100133836	NA	1.40056	0.486	0.000219		ILMN_1807206	DHRS1	115817	0.684917	-0.546	2.2e-05	1.46003
	ILMN_1707748	PIM3	415116	1.40056	0.486	0.000261		ILMN_1780825	RRAS	6237	0.685391	-0.545	0.000448	1.45902
	ILMN_1659523	USP39	10713	1.40056	0.486	0.00044		ILMN_1727458	HDAC1	3065	0.685867	-0.544	1.3e-05	1.45801
	ILMN_2175465	RSL24D1	51187	1.40056	0.486	0.00064		ILMN_2360730	CAV2	858	0.685867	-0.544	0.000127	1.45801
	ILMN_1713156	MSL3L1	NA	1.40056	0.486	0.004222		ILMN_1745110	LAPTM4A	9741	0.685867	-0.544	0.000211	1.45801
	ILMN_1678605	CDC123	8872	1.39959	0.485	4.6e-05		ILMN_2316278	MAGED4B	81557	0.685867	-0.544	0.00196	1.45801
	ILMN_1759436	NOSIP	51070	1.39959	0.485	6.5e-05		ILMN_1680738	C5ORF13	NA	0.686342	-0.543	0.000496	1.457
	ILMN_1732725	SAPS3	NA	1.39959	0.485	0.000114		ILMN_1754738	AP1M1	8907	0.686818	-0.542	1e-05	1.45599
	ILMN_1738529	BCS1L	617	1.39959	0.485	0.000119		ILMN_1752249	FAM38A	NA	0.687294	-0.541	0.001627	1.45498
	ILMN_1680129	NSUN2	54888	1.39959	0.485	0.000654		ILMN_1758128	CYGB	114757	0.687294	-0.541	0.002279	1.45498
	ILMN_1758918	BRD2	6046	1.39959	0.485	0.002014		ILMN_1739558	CRELD1	78987	0.687771	-0.54	0.000183	1.45397
	ILMN_1740234	GSTO2	119391	1.39959	0.485	0.014006		ILMN_1806017	PSME1	5720	0.687771	-0.54	0.001065	1.45397
	ILMN_1705753	C3ORF26	NA	1.39862	0.484	0.000156		ILMN_1696360	CTSB	1508	0.687771	-0.54	0.001237	1.45397
	ILMN_1740351	KIAA0174	NA	1.39862	0.484	0.000193		ILMN_1754969	LMCD1	29995	0.687771	-0.54	0.003155	1.45397
	ILMN_1708936	EXOSC3	51010	1.39862	0.484	0.000197		ILMN_2376667	POFUT2	23275	0.688248	-0.539	0.000397	1.45297
	ILMN_1756355	NDUFS3	4722	1.39765	0.483	9.9e-05		ILMN_1813763	SLC20A2	6575	0.688725	-0.538	7e-06	1.45196
	ILMN_1764177	JARID2	3720	1.39765	0.483	0.000192		ILMN_1691156	MT1A	4489	0.688725	-0.538	0.00025	1.45196
	ILMN_2181241	LOC649946	NA	1.39765	0.483	0.000302		ILMN_1723962	LXN	56925	0.688725	-0.538	0.002192	1.45196
	ILMN_2050112	LOC388524	NA	1.39765	0.483	0.001432		ILMN_2119555	TMTC3	160418	0.688725	-0.538	0.007971	1.45196
	ILMN_1662964	PRMT3	10196	1.39765	0.483	0.00507		ILMN_1816244	HS.4988	NA	0.689203	-0.537	0.000283	1.45095
	ILMN_1706342	ZNF746	155061	1.39668	0.482	2.3e-05		ILMN_1739241	CHAC1	79094	0.689203	-0.537	0.00152	1.45095
	ILMN_1772527	C12ORF44	NA	1.39668	0.482	5.5e-05		ILMN_1711994	TCIRG1	10312	0.690159	-0.535	0.000285	1.44894
	ILMN_1752226	P2RY11	5032	1.39668	0.482	0.000134		ILMN_1651832	EHD1	10938	0.690637	-0.534	4e-06	1.44794
	ILMN_1782688	THNSL1	79896	1.39668	0.482	0.00028		ILMN_3265343	LOC100130633	NA	0.690637	-0.534	7.1e-05	1.44794
	ILMN_1699636	ACIN1	22985	1.39668	0.482	0.000632		ILMN_1711823	C17ORF70	NA	0.690637	-0.534	9.6e-05	1.44794
	ILMN_1790909	NFE2L2	4780	1.39668	0.482	0.000986		ILMN_1793950	P704P	NA	0.690637	-0.534	0.002274	1.44794
	ILMN_1781400	SLC7A2	6542	1.39668	0.482	0.005676		ILMN_2364022	SLC16A3	9123	0.690637	-0.534	0.002653	1.44794
	ILMN_3309349	SNHG8	100093630	1.39571	0.481	0.022861		ILMN_1651405	BRD9	65980	0.691595	-0.532	1e-06	1.44593
	ILMN_1785635	BRD3	8019	1.39474	0.48	0.000314		ILMN_1784238	SEC22B	9554	0.691595	-0.532	0.003031	1.44593
	ILMN_3243291	LOC100133372	NA	1.39474	0.48	0.000749		ILMN_1691291	PIGS	94005	0.692075	-0.531	7e-06	1.44493
	ILMN_2205350	C6ORF66	NA	1.39474	0.48	0.002203		ILMN_1773002	LOC730417	NA	0.692075	-0.531	0.001446	1.44493
	ILMN_2072541	RAB11FIP2	22841	1.39474	0.48	0.00462		ILMN_1755123	GBA	2629	0.692555	-0.53	0.000635	1.44393
	ILMN_1721337	MRPS18B	28973	1.39378	0.479	0.000189		ILMN_1682139	RAI14	26064	0.692555	-0.53	0.008476	1.44393
	ILMN_1749432	MRPL32	64983	1.39378	0.479	0.000444		ILMN_1814213	PQLC3	NA	0.693515	-0.528	3.7e-05	1.44193
	ILMN_2056479	TXNL2	NA	1.39378	0.479	0.001296		ILMN_2410523	DDR2	4921	0.693996	-0.527	5.3e-05	1.44093
	ILMN_1689200	DHDH	27294	1.39281	0.478	0.000188		ILMN_2261076	NEDD9	4739	0.693996	-0.527	0.000536	1.44093
	ILMN_1690352	ADO	84890	1.39281	0.478	0.00021		ILMN_3246214	B3GNT1	NA	0.694478	-0.526	0.000842	1.43993
	ILMN_1730964	CLEC18C	283971	1.39281	0.478	0.009634		ILMN_1695290	FERMT2	10979	0.695441	-0.524	0.001824	1.43794
	ILMN_1792672	POLR2D	5433	1.39185	0.477	0.000167		ILMN_1778836	SFRS7	NA	0.695923	-0.523	0.001437	1.43694
	ILMN_1814113	ZFR	51663	1.39185	0.477	0.00017		ILMN_1757552	PTRF	NA	0.696406	-0.522	1.5e-05	1.43594
	ILMN_1681972	TMEM69	51249	1.39185	0.477	0.00026		ILMN_1766499	HSPA2	3306	0.696406	-0.522	0.001047	1.43594
	ILMN_1779404	PUF60	22827	1.39088	0.476	8.9e-05		ILMN_2075440	PDIA3P	NA	0.696406	-0.522	0.002505	1.43594
	ILMN_1687922	RP9	6100	1.39088	0.476	0.000668		ILMN_1775579	ACAD9	28976	0.697372	-0.52	2.2e-05	1.43396
	ILMN_2156982	IMP4	92856	1.38992	0.475	3e-05		ILMN_1751234	C1GALT1C1	29071	0.697372	-0.52	0.000156	1.43396
	ILMN_2196097	PPP2CA	5515	1.38992	0.475	0.000767		ILMN_2123402	TMEM4	NA	0.697855	-0.519	6.1e-05	1.43296
	ILMN_1736340	ANGEL2	90806	1.38992	0.475	0.002749		ILMN_1787844	C19ORF10	NA	0.698339	-0.518	1.3e-05	1.43197
	ILMN_1787370	C2ORF56	NA	1.38896	0.474	0.000126		ILMN_1772991	CHPF2	54480	0.699308	-0.516	0.000322	1.42999
	ILMN_1765091	ANKHD1	54882	1.38896	0.474	0.000158		ILMN_1728734	PSG5	5673	0.699308	-0.516	0.004305	1.42999
	ILMN_1704876	USP38	84640	1.38896	0.474	0.000663		ILMN_1701413	PIGQ	9091	0.699793	-0.515	3e-06	1.42899
	ILMN_3237589	PHAX	51808	1.38896	0.474	0.001519		ILMN_3236945	PTPMT1	114971	0.699793	-0.515	3.3e-05	1.42899
	ILMN_1697440	PRPF4	9128	1.38799	0.473	0.000212		ILMN_1662848	TXNDC15	79770	0.699793	-0.515	0.000167	1.42899
	ILMN_1802157	THOC1	9984	1.38799	0.473	0.000333		ILMN_2377900	MAP1B	4131	0.700278	-0.514	0.021382	1.428
	ILMN_1657888	SALL1	6299	1.38799	0.473	0.00231		ILMN_1780236	PMM1	5372	0.700764	-0.513	0.000155	1.42701
	ILMN_1673936	KHSRP	8570	1.38799	0.473	0.003533		ILMN_1744912	CTTN	2017	0.700764	-0.513	0.000376	1.42701
	ILMN_1790309	PINX1	54984	1.38799	0.473	0.00525		ILMN_1799856	NOMO2	283820	0.70125	-0.512	0.000492	1.42603
	ILMN_2318643	TGIF1	7050	1.38703	0.472	0.000216		ILMN_1686664	MT2A	4502	0.701736	-0.511	0.000252	1.42504
	ILMN_1727361	LEMD3	23592	1.38607	0.471	0.000232		ILMN_2408576	FAM129B	NA	0.701736	-0.511	0.00077	1.42504
	ILMN_1757384	RAN	5901	1.38607	0.471	0.000395		ILMN_1772612	ANGPTL2	23452	0.701736	-0.511	0.025709	1.42504
	ILMN_1700028	C9ORF156	NA	1.38511	0.47	0.000265		ILMN_1726873	TPCN2	219931	0.702222	-0.51	0.000208	1.42405
	ILMN_2066667	RRP8	23378	1.38511	0.47	0.001499		ILMN_1659297	FZD6	8323	0.702222	-0.51	0.001495	1.42405
	ILMN_1776263	TMEM174	134288	1.38511	0.47	0.011945		ILMN_1711516	ATP6V1A	523	0.702709	-0.509	4.5e-05	1.42306
	ILMN_1713449	TBX3	6926	1.38415	0.469	0.000302		ILMN_1741613	SERINC1	57515	0.702709	-0.509	0.004073	1.42306
	ILMN_1703430	FLJ10374	NA	1.38415	0.469	0.00045		ILMN_1685703	ACOX2	8309	0.702709	-0.509	0.017831	1.42306
	ILMN_2066124	AFG3L2	10939	1.38415	0.469	0.000502		ILMN_1808777	EHD2	30846	0.703197	-0.508	0.001606	1.42208
	ILMN_1710873	ZNF330	27309	1.38415	0.469	0.002885		ILMN_2230016	HIGD1A	25994	0.703197	-0.508	0.002009	1.42208
	ILMN_2104924	C21ORF70	NA	1.38319	0.468	0.000151		ILMN_1681340	C1ORF41	NA	0.703684	-0.507	0.004337	1.42109
	ILMN_1676846	ABCE1	6059	1.38319	0.468	0.001202		ILMN_2211780	SLC25A4	291	0.704172	-0.506	0.000285	1.42011
	ILMN_1671891	PID1	55022	1.38319	0.468	0.002044		ILMN_1688480	CCND1	595	0.704172	-0.506	0.000904	1.42011
	ILMN_3244506	LOC441089	NA	1.38223	0.467	6e-06		ILMN_1667966	C1ORF24	NA	0.704172	-0.506	0.009417	1.42011
	ILMN_3225894	LOC729774	729774	1.38223	0.467	0.001692		ILMN_1733756	COL12A1	1303	0.704172	-0.506	0.033735	1.42011
	ILMN_2110252	NPM3	10360	1.38223	0.467	0.002454		ILMN_2087702	MYH9	4627	0.70466	-0.505	1.7e-05	1.41912
	ILMN_1660547	ERC1	23085	1.38223	0.467	0.046453		ILMN_3223181	SEC13	6396	0.705149	-0.504	0.001927	1.41814
	ILMN_1726842	TYW3	127253	1.38127	0.466	1.7e-05		ILMN_2075603	MRGPRF	116535	0.705638	-0.503	5.4e-05	1.41716
	ILMN_1686750	MGEA5	NA	1.38127	0.466	0.00021		ILMN_1773901	STX12	23673	0.705638	-0.503	0.000166	1.41716
	ILMN_1760849	NETO2	81831	1.38127	0.466	0.000318		ILMN_2324994	IKBIP	121457	0.706617	-0.501	0.00029	1.41519
	ILMN_1733377	FASTKD5	60493	1.38127	0.466	0.00045		ILMN_1795429	VCL	7414	0.706617	-0.501	0.000321	1.41519
	ILMN_1789410	ZSCAN21	7589	1.38127	0.466	0.000571		ILMN_1659753	LAMP2	3920	0.706617	-0.501	0.000491	1.41519
	ILMN_1771057	XAB2	56949	1.38127	0.466	0.007424		ILMN_1805448	EPB41L2	2037	0.706617	-0.501	0.000946	1.41519
	ILMN_1720373	SLC7A5	8140	1.38127	0.466	0.014336		ILMN_1764109	C1R	715	0.707107	-0.5	0.008936	1.41421
	ILMN_1710354	KIFC3	3801	1.38127	0.466	0.038002		ILMN_1785765	TM9SF2	9375	0.707597	-0.499	6.8e-05	1.41323
	ILMN_2348050	MRPL21	219927	1.38032	0.465	0.000288		ILMN_2086890	ANGPT1	284	0.707597	-0.499	0.001095	1.41323
	ILMN_1678140	TTC4	7268	1.38032	0.465	0.00074		ILMN_1752520	SLFN11	91607	0.707597	-0.499	0.00345	1.41323
	ILMN_1680703	MRPS15	64960	1.38032	0.465	0.000884		ILMN_1737283	MGC39900	NA	0.707597	-0.499	0.02726	1.41323
	ILMN_3221790	LOC729123	NA	1.38032	0.465	0.00104		ILMN_2134538	FTHL11	NA	0.707597	-0.499	0.038505	1.41323
	ILMN_1679405	DDX56	54606	1.38032	0.465	0.001123		ILMN_3260017	HNRNPK	3190	0.70907	-0.496	0.001885	1.4103
	ILMN_1665004	CASC3	22794	1.38032	0.465	0.00179		ILMN_2296950	APOBEC3F	200316	0.70907	-0.496	0.01198	1.4103
	ILMN_1743638	ABCG1	9619	1.38032	0.465	0.019255		ILMN_2179726	C16ORF93	NA	0.709562	-0.495	1.3e-05	1.40932
	ILMN_1714809	RPIA	22934	1.37936	0.464	9.9e-05		ILMN_1804611	C12ORF23	NA	0.710054	-0.494	0.000302	1.40834
	ILMN_1719039	UBE2G1	7326	1.37936	0.464	0.000225		ILMN_1708934	ADM	133	0.710054	-0.494	0.004419	1.40834
	ILMN_1672128	ATF4	468	1.37936	0.464	0.003834		ILMN_1787885	NUDT18	79873	0.710546	-0.493	4.9e-05	1.40737
	ILMN_1690282	CRADD	8738	1.37841	0.463	0.000112		ILMN_1701204	VEGFC	7424	0.711039	-0.492	0.003462	1.40639
	ILMN_2394498	SYF2	25949	1.37841	0.463	0.00026		ILMN_1712312	RAB11A	8766	0.711532	-0.491	5.4e-05	1.40542
	ILMN_2182198	ICT1	NA	1.37841	0.463	0.001015		ILMN_1707336	ARPC4	10093	0.711532	-0.491	0.000167	1.40542
	ILMN_1810228	TTF2	8458	1.37841	0.463	0.001658		ILMN_2101885	TUBB	203068	0.711532	-0.491	0.000196	1.40542
	ILMN_1730658	YTHDF2	51441	1.37745	0.462	0.000113		ILMN_3238058	LOC151162	NA	0.711532	-0.491	0.000842	1.40542
	ILMN_1730048	C7ORF26	NA	1.37745	0.462	0.000141		ILMN_1705302	FCGRT	2217	0.711532	-0.491	0.00178	1.40542
	ILMN_1804812	ANAPC1	64682	1.37745	0.462	0.000342		ILMN_3236904	LOC648740	NA	0.712025	-0.49	0.000102	1.40444
	ILMN_1753498	COASY	80347	1.37745	0.462	0.00037		ILMN_2124585	GREM1	26585	0.712025	-0.49	0.001408	1.40444
	ILMN_1686194	SDCCAG10	NA	1.37745	0.462	0.004907		ILMN_2151281	GABARAPL1	23710	0.712025	-0.49	0.002608	1.40444
	ILMN_1711628	LOC728951	NA	1.3765	0.461	0.000208		ILMN_2222880	SLC25A42	284439	0.712025	-0.49	0.002964	1.40444
	ILMN_1757847	C11ORF68	NA	1.3765	0.461	0.000872		ILMN_1714335	RDH10	157506	0.712519	-0.489	0.028904	1.40347
	ILMN_2175265	TMEM11	8834	1.3765	0.461	0.001171		ILMN_2317923	TMEM132A	54972	0.712519	-0.489	0.032802	1.40347
	ILMN_1720124	RCC2	55920	1.3765	0.461	0.014792		ILMN_1756439	SCRN1	9805	0.713013	-0.488	0.001421	1.4025
	ILMN_2319414	BTF3	689	1.37554	0.46	0.000395		ILMN_1741003	ANXA5	308	0.713013	-0.488	0.003453	1.4025
	ILMN_1754570	KCTD8	386617	1.37554	0.46	0.009102		ILMN_1719986	PIK3IP1	113791	0.713013	-0.488	0.005483	1.4025
	ILMN_1670263	C1ORF71	NA	1.37459	0.459	0.000266		ILMN_1796339	PLEKHA2	59339	0.713013	-0.488	0.018816	1.4025
	ILMN_1671452	MRPL44	65080	1.37459	0.459	0.001247		ILMN_1733851	DACT3	147906	0.714002	-0.486	0.000166	1.40056
	ILMN_1757439	RBM4	5936	1.37459	0.459	0.002129		ILMN_1775829	PERP	64065	0.714497	-0.485	6.7e-05	1.39959
	ILMN_1801664	POLR3K	51728	1.37364	0.458	4.8e-05		ILMN_1750100	TUBB4Q	NA	0.714497	-0.485	0.002722	1.39959
	ILMN_1815051	API5	8539	1.37364	0.458	0.000255		ILMN_2139396	IGDCC4	57722	0.714497	-0.485	0.015967	1.39959
	ILMN_1746465	FJX1	24147	1.37364	0.458	0.000365		ILMN_1735155	GLB1	2720	0.714993	-0.484	0.000248	1.39862
	ILMN_1686553	INTS2	57508	1.37364	0.458	0.000395		ILMN_1697694	ATP6AP1	537	0.714993	-0.484	0.002143	1.39862
	ILMN_2158003	KIAA1683	NA	1.37364	0.458	0.001437		ILMN_1683927	ITGAE	3682	0.715488	-0.483	0.024305	1.39765
	ILMN_1676548	BZW2	28969	1.37364	0.458	0.011228		ILMN_1672591	SCN9A	6335	0.715984	-0.482	0.000522	1.39668
	ILMN_1790354	RABGGTB	5876	1.37268	0.457	0.001443		ILMN_1763000	ADAP2	55803	0.716481	-0.481	2.1e-05	1.39571
	ILMN_1673704	INA	9118	1.37268	0.457	0.009558		ILMN_1687247	SPATA20	64847	0.716481	-0.481	0.000577	1.39571
	ILMN_1654543	MED6	10001	1.37173	0.456	0.000128		ILMN_1804150	HIBADH	11112	0.717475	-0.479	0.000499	1.39378
	ILMN_1674780	SF3B1	23451	1.37173	0.456	0.000349		ILMN_1803180	PRDX6	9588	0.717972	-0.478	3.1e-05	1.39281
	ILMN_2414165	PRDM1	639	1.37173	0.456	0.000444		ILMN_1694432	CRIP2	1397	0.71847	-0.477	0.000901	1.39185
	ILMN_2411559	PUS1	80324	1.37173	0.456	0.000787		ILMN_1758398	GUK1	2987	0.718968	-0.476	0.000164	1.39088
	ILMN_1681558	LOC728956	NA	1.37078	0.455	0.000469		ILMN_1766925	CDH13	1012	0.718968	-0.476	0.003335	1.39088
	ILMN_1719097	C18ORF8	NA	1.37078	0.455	0.000492		ILMN_1735453	FAM98A	25940	0.719467	-0.475	0.000882	1.38992
	ILMN_1703524	SRP68	6730	1.37078	0.455	0.001658		ILMN_2405642	DHDDS	79947	0.719467	-0.475	0.001076	1.38992
	ILMN_1678998	LRRC14	9684	1.37078	0.455	0.00424		ILMN_1693136	VTI1B	10490	0.719467	-0.475	0.001223	1.38992
	ILMN_1763036	CLCN6	1185	1.36983	0.454	0.000125		ILMN_1655429	TNFAIP1	7126	0.719467	-0.475	0.006339	1.38992
	ILMN_2405628	TOP1MT	116447	1.36983	0.454	0.001273		ILMN_1733515	LOXL3	84695	0.719467	-0.475	0.006379	1.38992
	ILMN_2130838	UTP11L	NA	1.36983	0.454	0.001452		ILMN_1685312	PSG3	5671	0.719966	-0.474	0.00421	1.38896
	ILMN_1709132	ELP2	55250	1.36983	0.454	0.004574		ILMN_1662166	PTK7	5754	0.720465	-0.473	0.000964	1.38799
	ILMN_2209180	P15RS	NA	1.36983	0.454	0.023718		ILMN_1755391	ARL2BP	23568	0.720465	-0.473	0.00593	1.38799
	ILMN_1672660	MBP	4155	1.36888	0.453	0.000127		ILMN_1697420	TINF2	26277	0.720465	-0.473	0.036136	1.38799
	ILMN_1673682	GATAD2A	54815	1.36888	0.453	0.000221		ILMN_1673566	ADAMTS1	9510	0.720465	-0.473	0.043498	1.38799
	ILMN_2389273	FXR1	8087	1.36888	0.453	0.00026		ILMN_1737157	GRAMD1A	57655	0.720964	-0.472	3.1e-05	1.38703
	ILMN_1671005	IRF2BP2	359948	1.36888	0.453	0.000449		ILMN_1693045	TMED1	11018	0.720964	-0.472	5.6e-05	1.38703
	ILMN_2168992	FBXO30	84085	1.36888	0.453	0.00049		ILMN_1741727	QPCT	25797	0.720964	-0.472	0.000129	1.38703
	ILMN_1792910	MNT	4335	1.36888	0.453	0.000672		ILMN_1767816	APH1B	83464	0.720964	-0.472	0.000771	1.38703
	ILMN_2186597	RPP21	79897	1.36888	0.453	0.000997		ILMN_1679391	MAMDC2	256691	0.720964	-0.472	0.003808	1.38703
	ILMN_1673111	TSEN34	79042	1.36888	0.453	0.001769		ILMN_2085922	WRB	NA	0.720964	-0.472	0.00568	1.38703
	ILMN_1651513	SKIV2L2	NA	1.36888	0.453	0.035695		ILMN_1763539	IER3IP1	51124	0.721464	-0.471	0.000245	1.38607
	ILMN_3247979	LOC100132024	NA	1.36888	0.453	0.04601		ILMN_1789136	SERF2	10169	0.721464	-0.471	0.000305	1.38607
	ILMN_1708147	TBPL1	9519	1.36794	0.452	0.000336		ILMN_1796712	S100A10	6281	0.721464	-0.471	0.000564	1.38607
	ILMN_2183389	TTC9C	283237	1.36794	0.452	0.000558		ILMN_1812262	DDR1	780	0.721464	-0.471	0.000905	1.38607
	ILMN_1738369	TUFM	7284	1.36794	0.452	0.001303		ILMN_1716026	ARMCX6	54470	0.721965	-0.47	0.000161	1.38511
	ILMN_1685661	RRP15	51018	1.36699	0.451	0.000331		ILMN_1784985	PRRT3	285368	0.721965	-0.47	0.003237	1.38511
	ILMN_1737561	LOC88523	NA	1.36699	0.451	0.000402		ILMN_2311052	COL13A1	1305	0.722465	-0.469	0.000155	1.38415
	ILMN_1679867	LOC642255	NA	1.36699	0.451	0.000869		ILMN_1759915	ARPC1A	10552	0.722465	-0.469	0.002332	1.38415
	ILMN_1670638	PITPNC1	26207	1.36699	0.451	0.002071		ILMN_1810559	RHOQ	23433	0.722966	-0.468	0.000401	1.38319
	ILMN_1763264	MRPL2	51069	1.36699	0.451	0.003153		ILMN_2412927	GMPPB	29925	0.722966	-0.468	0.000677	1.38319
	ILMN_1655316	PSMC6	5706	1.36699	0.451	0.029163		ILMN_1688848	TMEM44	93109	0.723467	-0.467	0.000208	1.38223
	ILMN_1673788	CDV3	55573	1.36604	0.45	0.001335		ILMN_1787026	SEC61G	23480	0.723467	-0.467	0.000844	1.38223
	ILMN_1659095	LOC644029	NA	1.36604	0.45	0.031314		ILMN_1746013	SPOCK1	6695	0.723467	-0.467	0.000887	1.38223
	ILMN_1679324	EIF1B	10289	1.36509	0.449	0.000572		ILMN_1683576	MAGED2	10916	0.723467	-0.467	0.002608	1.38223
	ILMN_1809951	ZNF200	7752	1.36509	0.449	0.000605		ILMN_1704286	FXYD5	53827	0.723969	-0.466	0.000106	1.38127
	ILMN_1671270	EMP2	2013	1.36509	0.449	0.001827		ILMN_3187535	FAM30A	9834	0.724471	-0.465	0.000552	1.38032
	ILMN_1745119	C7ORF11	NA	1.36509	0.449	0.001904		ILMN_1808898	NPR2	4882	0.724471	-0.465	0.000867	1.38032
	ILMN_1796074	C18ORF56	NA	1.36509	0.449	0.002069		ILMN_1754660	ZCCHC24	219654	0.724973	-0.464	0.000156	1.37936
	ILMN_2347888	LARP4	113251	1.36509	0.449	0.004449		ILMN_1810875	SYNGR1	9145	0.724973	-0.464	0.000283	1.37936
	ILMN_1718815	SLTM	79811	1.36509	0.449	0.005354		ILMN_1755234	SSH3	54961	0.724973	-0.464	0.001326	1.37936
	ILMN_1743137	BAT2D1	NA	1.36509	0.449	0.005539		ILMN_1773650	LRRN3	54674	0.724973	-0.464	0.01052	1.37936
	ILMN_1788604	WBP2	23558	1.36509	0.449	0.011284		ILMN_2129234	TMEM47	83604	0.725476	-0.463	0.001193	1.37841
	ILMN_1718069	MIS12	79003	1.36415	0.448	0.000339		ILMN_1763447	PLXNB2	23654	0.725476	-0.463	0.004449	1.37841
	ILMN_1717745	TIAL1	7073	1.36415	0.448	0.002595		ILMN_1727332	ATPIF1	NA	0.725979	-0.462	0.000766	1.37745
	ILMN_2413259	SOCS4	122809	1.36415	0.448	0.006115		ILMN_1652456	TMEM98	26022	0.725979	-0.462	0.005886	1.37745
	ILMN_1694603	SMARCC1	6599	1.3632	0.447	0.000371		ILMN_1654441	OAT	4942	0.725979	-0.462	0.008542	1.37745
	ILMN_1683932	ZNF425	155054	1.3632	0.447	0.013643		ILMN_1676088	MSRB3	253827	0.726483	-0.461	0.000283	1.3765
	ILMN_1798804	SRPK1	6732	1.36226	0.446	0.00076		ILMN_1670145	DFNA5	NA	0.726483	-0.461	0.0012	1.3765
	ILMN_1657612	LOC285900	NA	1.36226	0.446	0.000889		ILMN_1789599	NBL1	4681	0.726483	-0.461	0.006573	1.3765
	ILMN_1759513	RND3	390	1.36226	0.446	0.020911		ILMN_1703477	ARHGEF2	9181	0.726483	-0.461	0.019013	1.3765
	ILMN_1786242	LOC649821	NA	1.36226	0.446	0.026		ILMN_1683817	UBE2Q2	92912	0.726986	-0.46	0.000441	1.37554
	ILMN_1694479	WDR18	57418	1.36131	0.445	4.2e-05		ILMN_2132982	IGFBP5	3488	0.72749	-0.459	0.000539	1.37459
	ILMN_2381121	UQCC	NA	1.36131	0.445	0.000995		ILMN_1811551	DERA	51071	0.72749	-0.459	0.007089	1.37459
	ILMN_1787212	CDKN1A	1026	1.36131	0.445	0.001973		ILMN_1780769	TUBB2C	NA	0.7285	-0.457	0.000771	1.37268
	ILMN_1736510	FOXN2	3344	1.36131	0.445	0.021016		ILMN_1698100	ANXA2P1	303	0.7285	-0.457	0.007988	1.37268
	ILMN_1708203	OTUD4	54726	1.36131	0.445	0.022107		ILMN_1803213	MXRA5	25878	0.7285	-0.457	0.022007	1.37268
	ILMN_2124361	LEAP2	116842	1.36037	0.444	7.1e-05		ILMN_1770800	PODN	127435	0.729005	-0.456	0.001695	1.37173
	ILMN_1711650	KCNE1L	NA	1.36037	0.444	0.000219		ILMN_1803995	TM7SF3	51768	0.72951	-0.455	0.000491	1.37078
	ILMN_1803997	SDCCAG3	NA	1.36037	0.444	0.000444		ILMN_2399036	SEPN1	NA	0.72951	-0.455	0.001292	1.37078
	ILMN_1652287	NOG	9241	1.36037	0.444	0.000766		ILMN_1796216	VASH1	22846	0.730016	-0.454	0.000123	1.36983
	ILMN_1767892	DUSP12	11266	1.36037	0.444	0.000924		ILMN_2328029	EXT2	2132	0.730016	-0.454	0.00045	1.36983
	ILMN_3244286	TANC2	26115	1.36037	0.444	0.001061		ILMN_1788387	UGCGL2	NA	0.730016	-0.454	0.002731	1.36983
	ILMN_1653896	ATRIP	84126	1.36037	0.444	0.004339		ILMN_1730734	TMEM205	374882	0.730016	-0.454	0.003328	1.36983
	ILMN_1703617	AHSA1	10598	1.36037	0.444	0.006519		ILMN_1809437	RHBDD2	57414	0.730522	-0.453	0.000273	1.36888
	ILMN_1661945	C14ORF156	NA	1.35943	0.443	9.6e-05		ILMN_2364376	ILK	3611	0.730522	-0.453	0.000291	1.36888
	ILMN_1772677	CNOT4	4850	1.35943	0.443	0.000198		ILMN_1771593	RRM1	6240	0.730522	-0.453	0.000923	1.36888
	ILMN_1768743	FIP1L1	81608	1.35849	0.442	5.4e-05		ILMN_1740319	IFI27L2	83982	0.730522	-0.453	0.002856	1.36888
	ILMN_1774990	C16ORF13	NA	1.35849	0.442	0.00035		ILMN_1758941	REEP5	7905	0.730522	-0.453	0.00424	1.36888
	ILMN_1658416	MRPS18C	51023	1.35849	0.442	0.002474		ILMN_2226324	BRP44L	NA	0.730522	-0.453	0.007662	1.36888
	ILMN_2196337	C12ORF11	NA	1.35849	0.442	0.003265		ILMN_1677534	SCAP	22937	0.730522	-0.453	0.015463	1.36888
	ILMN_1693669	WDR79	NA	1.35849	0.442	0.003399		ILMN_1762308	LOC654191	NA	0.731029	-0.452	0.000185	1.36794
	ILMN_1745423	UTP3	57050	1.35755	0.441	0.000317		ILMN_1783226	SSR2	6746	0.732043	-0.45	0.000489	1.36604
	ILMN_1661197	CLCF1	23529	1.35755	0.441	0.002405		ILMN_1659659	MAGEH1	28986	0.732043	-0.45	0.004109	1.36604
	ILMN_1720158	ETS2	2114	1.35755	0.441	0.013176		ILMN_1727532	OLFML3	56944	0.732043	-0.45	0.006319	1.36604
	ILMN_1761479	ZC3HC1	51530	1.3566	0.44	7.1e-05		ILMN_2326071	MYL6	4637	0.73255	-0.449	0.000119	1.36509
	ILMN_3238889	RPRD2	23248	1.3566	0.44	0.000232		ILMN_1668507	DDAH1	23576	0.73255	-0.449	0.000534	1.36509
	ILMN_1853876	HS.567759	NA	1.3566	0.44	0.000452		ILMN_1687533	SEMA4D	10507	0.73255	-0.449	0.001558	1.36509
	ILMN_1679727	CLK1	1195	1.3566	0.44	0.002165		ILMN_1803277	MVP	9961	0.733058	-0.448	0.000982	1.36415
	ILMN_3229033	LOC732360	NA	1.3566	0.44	0.012683		ILMN_1766221	B4GALT1	2683	0.733058	-0.448	0.003413	1.36415
	ILMN_1686811	LOC402644	NA	1.3566	0.44	0.035424		ILMN_1810725	FAM129A	NA	0.733058	-0.448	0.015144	1.36415
	ILMN_1746598	SCNM1	79005	1.35566	0.439	0.000346		ILMN_1720858	C6ORF115	NA	0.733058	-0.448	0.021134	1.36415
	ILMN_1856480	HS.19339	NA	1.35566	0.439	0.000489		ILMN_1756992	MUC1	4582	0.733567	-0.447	0.000732	1.3632
	ILMN_1714600	NAV3	89795	1.35566	0.439	0.005069		ILMN_2168314	PGM3	5238	0.733567	-0.447	0.004813	1.3632
	ILMN_1786469	FBXO22	26263	1.35566	0.439	0.009653		ILMN_2151739	CAT	847	0.734075	-0.446	0.004497	1.36226
	ILMN_3236239	LOC100129550	NA	1.35566	0.439	0.012905		ILMN_1768558	LOC727848	NA	0.734075	-0.446	0.006753	1.36226
	ILMN_1801230	DNASE1L1	1774	1.35566	0.439	0.019861		ILMN_1717262	PROCR	10544	0.734075	-0.446	0.032264	1.36226
	ILMN_1771139	FBXO31	79791	1.35472	0.438	0.000103		ILMN_1765796	ENO2	2026	0.734584	-0.445	0.018018	1.36131
	ILMN_2195821	C5ORF41	NA	1.35472	0.438	0.000633		ILMN_1769092	FAM176B	NA	0.735094	-0.444	0.001397	1.36037
	ILMN_1790577	SLC35F2	54733	1.35472	0.438	0.000706		ILMN_1772743	PIGK	10026	0.735094	-0.444	0.006386	1.36037
	ILMN_1810423	RPP40	10799	1.35472	0.438	0.001614		ILMN_1785356	DENND5A	23258	0.735094	-0.444	0.019388	1.36037
	ILMN_1765829	NUFIP2	57532	1.35472	0.438	0.007934		ILMN_1660000	SNURF	8926	0.735603	-0.443	0.001027	1.35943
	ILMN_1688034	COIL	8161	1.35379	0.437	0.000194		ILMN_2409642	TRO	7216	0.735603	-0.443	0.001551	1.35943
	ILMN_1793988	BDNF	627	1.35379	0.437	0.000489		ILMN_1815734	FCHSD2	9873	0.735603	-0.443	0.021229	1.35943
	ILMN_1785795	METAP1	23173	1.35379	0.437	0.001374		ILMN_2220739	TMCO3	55002	0.736113	-0.442	4e-05	1.35849
	ILMN_1761044	GNB1L	54584	1.35379	0.437	0.001394		ILMN_3184724	C7ORF58	NA	0.736113	-0.442	0.000327	1.35849
	ILMN_1670931	PDS5A	23244	1.35379	0.437	0.001647		ILMN_1659564	SEC61A1	29927	0.736113	-0.442	0.001211	1.35849
	ILMN_1660661	TCP1	6950	1.35379	0.437	0.001811		ILMN_1725534	ACTN4	81	0.736113	-0.442	0.001674	1.35849
	ILMN_1684964	ZNF212	7988	1.35379	0.437	0.003182		ILMN_2142554	NENF	29937	0.736113	-0.442	0.001991	1.35849
	ILMN_1753183	CDCA4	55038	1.35379	0.437	0.01791		ILMN_2117171	LMO4	8543	0.736113	-0.442	0.002666	1.35849
	ILMN_2319994	RPL3	6122	1.35379	0.437	0.019843		ILMN_1742450	TAPBP	6892	0.736113	-0.442	0.026874	1.35849
	ILMN_1800540	CD55	1604	1.35379	0.437	0.031796		ILMN_1725079	TSPAN31	6302	0.736624	-0.441	0.000157	1.35755
	ILMN_1660305	PDE12	201626	1.35285	0.436	0.000197		ILMN_1797974	AIG1	51390	0.736624	-0.441	0.001594	1.35755
	ILMN_2389582	HNRNPL	3191	1.35285	0.436	0.000292		ILMN_2099301	UNC84B	NA	0.737135	-0.44	0.00145	1.3566
	ILMN_1763828	MTF1	4520	1.35285	0.436	0.001159		ILMN_1794190	CCPG1	9236	0.737135	-0.44	0.001972	1.3566
	ILMN_1756849	HIST1H2AE	NA	1.35285	0.436	0.001746		ILMN_1693452	GAL3ST4	79690	0.737135	-0.44	0.028553	1.3566
	ILMN_1787265	ZNF503	84858	1.35285	0.436	0.003474		ILMN_2141482	SERPINF1	5176	0.737646	-0.439	0.000638	1.35566
	ILMN_1697088	ARMC5	79798	1.35191	0.435	6.1e-05		ILMN_2041788	PLS3	5358	0.737646	-0.439	0.002016	1.35566
	ILMN_2410742	JMJD1C	221037	1.35191	0.435	0.015463		ILMN_1748911	SNAP23	8773	0.737646	-0.439	0.002155	1.35566
	ILMN_1691570	METTL5	29081	1.35191	0.435	0.028995		ILMN_1777794	PRKCSH	5589	0.737646	-0.439	0.003728	1.35566
	ILMN_1803853	NOL7	51406	1.35097	0.434	3.6e-05		ILMN_1784364	STARD5	80765	0.738157	-0.438	0.01149	1.35472
	ILMN_1696021	KPNA6	23633	1.35097	0.434	0.000736		ILMN_1682930	SIPA1	6494	0.738669	-0.437	0.000271	1.35379
	ILMN_2333319	PTBP1	5725	1.35097	0.434	0.001123		ILMN_1775448	PFN2	5217	0.739181	-0.436	0.00036	1.35285
	ILMN_1749218	TOPORS	10210	1.35097	0.434	0.001401		ILMN_2197365	RGS2	5997	0.739181	-0.436	0.001956	1.35285
	ILMN_1739008	ATG9A	79065	1.35097	0.434	0.005045		ILMN_1664750	TMBIM4	51643	0.739181	-0.436	0.002083	1.35285
	ILMN_2101920	HNRPH1	NA	1.35097	0.434	0.012803		ILMN_1791067	TESK1	7016	0.739181	-0.436	0.002189	1.35285
	ILMN_2100689	MAP2K4	6416	1.35004	0.433	0.000183		ILMN_1704537	PHGDH	26227	0.739181	-0.436	0.002405	1.35285
	ILMN_1741985	BBS10	79738	1.35004	0.433	0.000664		ILMN_1674236	HSPB1	3315	0.739181	-0.436	0.003557	1.35285
	ILMN_2381397	HSPD1	3329	1.35004	0.433	0.006867		ILMN_1869109	HS.213061	NA	0.739181	-0.436	0.00392	1.35285
	ILMN_2397776	ASB6	140459	1.3491	0.432	0.000228		ILMN_2380698	DSTN	11034	0.739181	-0.436	0.007657	1.35285
	ILMN_1864422	HS.283402	NA	1.3491	0.432	0.002747		ILMN_1724293	KDELR2	11014	0.739181	-0.436	0.011579	1.35285
	ILMN_1812973	RRP1B	23076	1.3491	0.432	0.00798		ILMN_1789751	MFSD1	64747	0.739694	-0.435	0.000929	1.35191
	ILMN_1753279	HNRNPA0	10949	1.34817	0.431	9.4e-05		ILMN_2400874	SCYL1	57410	0.740207	-0.434	0.000176	1.35097
	ILMN_1721669	IDH3B	3420	1.34817	0.431	0.000167		ILMN_1710284	HES1	3280	0.740207	-0.434	0.000596	1.35097
	ILMN_2325234	PQBP1	10084	1.34817	0.431	0.000731		ILMN_1770084	TACC1	6867	0.740207	-0.434	0.00074	1.35097
	ILMN_1789244	SOX8	30812	1.34817	0.431	0.001509		ILMN_1752579	ATP6V0A1	535	0.740207	-0.434	0.007485	1.35097
	ILMN_2368971	PSMD12	5718	1.34817	0.431	0.002047		ILMN_3194508	ASAP2	8853	0.74072	-0.433	0.000213	1.35004
	ILMN_1798129	C4ORF23	NA	1.34817	0.431	0.018976		ILMN_1683700	TNFSF12	8742	0.74072	-0.433	0.000345	1.35004
	ILMN_2412761	MAFG	4097	1.34723	0.43	0.000105		ILMN_2309180	SMARCD3	6604	0.74072	-0.433	0.001606	1.35004
	ILMN_1708841	GOLPH3	64083	1.34723	0.43	0.00106		ILMN_1677440	ATP6AP2	10159	0.74072	-0.433	0.004466	1.35004
	ILMN_1746135	PHF23	79142	1.34723	0.43	0.001444		ILMN_1763147	NDUFB6	4712	0.74072	-0.433	0.006867	1.35004
	ILMN_2395043	HSPA4	3308	1.34723	0.43	0.00207		ILMN_3282587	LOC644914	NA	0.74072	-0.433	0.008614	1.35004
	ILMN_1684802	TAF5	6877	1.34723	0.43	0.002124		ILMN_1719695	NFKBIZ	64332	0.74072	-0.433	0.031044	1.35004
	ILMN_1794011	CHST2	9435	1.34723	0.43	0.010138		ILMN_3245476	PHRF1	57661	0.741233	-0.432	0.000773	1.3491
	ILMN_3226505	MSL3	10943	1.34723	0.43	0.033499		ILMN_1685124	TCTN1	79600	0.741233	-0.432	0.00274	1.3491
	ILMN_1706539	KDM3B	51780	1.3463	0.429	0.000545		ILMN_2090105	TAGLN2	8407	0.741748	-0.431	0.000167	1.34817
	ILMN_3307786	L3MBTL2	83746	1.3463	0.429	0.001779		ILMN_2050023	CCDC23	NA	0.741748	-0.431	0.001528	1.34817
	ILMN_1752793	SAP18	10284	1.3463	0.429	0.001827		ILMN_1684628	ZFP90	146198	0.741748	-0.431	0.007216	1.34817
	ILMN_1698478	SNAPC2	6618	1.3463	0.429	0.002321		ILMN_1766169	BCAT1	586	0.741748	-0.431	0.014144	1.34817
	ILMN_2391522	MRPL47	57129	1.3463	0.429	0.008143		ILMN_1801043	GSN	2934	0.742262	-0.43	0.000992	1.34723
	ILMN_2311518	TROVE2	NA	1.3463	0.429	0.010531		ILMN_1669323	BACE2	25825	0.742262	-0.43	0.001092	1.34723
	ILMN_1780334	KCNJ2	3759	1.3463	0.429	0.013965		ILMN_1810054	CNN1	1264	0.742262	-0.43	0.006012	1.34723
	ILMN_1712708	TRIM47	91107	1.3463	0.429	0.028316		ILMN_1673409	MGC16121	NA	0.742776	-0.429	0.00025	1.3463
	ILMN_2188521	PVRL3	NA	1.3463	0.429	0.029722		ILMN_1809522	NACC2	138151	0.742776	-0.429	0.000766	1.3463
	ILMN_1747650	BMP6	654	1.34537	0.428	0.001065		ILMN_1694539	MAP3K6	9064	0.742776	-0.429	0.001991	1.3463
	ILMN_1689110	NOB1	28987	1.34537	0.428	0.004852		ILMN_1653711	FZD2	2535	0.742776	-0.429	0.002676	1.3463
	ILMN_2411963	RBM39	9584	1.34537	0.428	0.013512		ILMN_1780141	TMEM66	NA	0.743291	-0.428	0.000489	1.34537
	ILMN_1746252	LOC391811	NA	1.34537	0.428	0.014826		ILMN_1743340	CHST14	113189	0.743291	-0.428	0.001444	1.34537
	ILMN_1788607	RPL23A	6147	1.34537	0.428	0.015137		ILMN_1711566	TIMP1	7076	0.743291	-0.428	0.002417	1.34537
	ILMN_2097546	NUDC	10726	1.34444	0.427	4.7e-05		ILMN_1655405	SCARF2	91179	0.743291	-0.428	0.00295	1.34537
	ILMN_1662334	DNAJA3	9093	1.34444	0.427	0.000351		ILMN_3200140	LOC645638	NA	0.743291	-0.428	0.032968	1.34537
	ILMN_2411076	MATR3	9782	1.34444	0.427	0.000856		ILMN_1667361	COPZ2	51226	0.743807	-0.427	0.006558	1.34443
	ILMN_2138765	PLIN2	123	1.34444	0.427	0.001674		ILMN_2359453	ERGIC3	51614	0.744323	-0.426	0.00205	1.3435
	ILMN_1663035	SREBF1	6720	1.34444	0.427	0.00236		ILMN_1792314	ACTR1A	10121	0.744839	-0.425	0.000499	1.34257
	ILMN_1740345	THYN1	29087	1.34444	0.427	0.002899		ILMN_2187718	COX17	10063	0.744839	-0.425	0.000732	1.34257
	ILMN_3235148	FLJ43681	NA	1.34444	0.427	0.007331		ILMN_1724376	C2ORF30	NA	0.744839	-0.425	0.009659	1.34257
	ILMN_1790807	XPC	7508	1.3435	0.426	0.000273		ILMN_1781388	PGM5	5239	0.744839	-0.425	0.014564	1.34257
	ILMN_1706094	HECTD1	25831	1.3435	0.426	0.000686		ILMN_1696622	SLC38A6	145389	0.745355	-0.424	0.003173	1.34164
	ILMN_1700202	TMEM135	65084	1.3435	0.426	0.001006		ILMN_1671149	MEG3	55384	0.745355	-0.424	0.00323	1.34164
	ILMN_1672366	PIGY	84992	1.3435	0.426	0.001824		ILMN_1689953	CD81	975	0.745872	-0.423	0.001856	1.34071
	ILMN_2363361	SFXN4	119559	1.3435	0.426	0.002542		ILMN_1692938	PSAT1	29968	0.745872	-0.423	0.013041	1.34071
	ILMN_1729509	C1ORF43	NA	1.3435	0.426	0.003225		ILMN_3258795	FAM13B	51306	0.746389	-0.422	0.000336	1.33978
	ILMN_1792092	ZCCHC8	55596	1.34257	0.425	0.000284		ILMN_1695962	SLC12A9	56996	0.746389	-0.422	0.001312	1.33978
	ILMN_1701131	C2ORF49	NA	1.34257	0.425	0.000605		ILMN_1773780	FAM173A	NA	0.746389	-0.422	0.006506	1.33978
	ILMN_1651347	SERTAD2	9792	1.34257	0.425	0.026729		ILMN_1678692	MPRIP	23164	0.746907	-0.421	0.006901	1.33886
	ILMN_1757627	ZMYND19	116225	1.34164	0.424	6.5e-05		ILMN_1807493	ACVRL1	94	0.746907	-0.421	0.032108	1.33886
	ILMN_1731354	PARL	55486	1.34164	0.424	0.00053		ILMN_1651343	ITGA11	22801	0.747425	-0.42	0.000886	1.33793
	ILMN_2077733	C12ORF30	NA	1.34164	0.424	0.001491		ILMN_1803423	ARHGEF6	9459	0.747425	-0.42	0.007548	1.33793
	ILMN_1659106	PHLDA3	23612	1.34164	0.424	0.007235		ILMN_1718972	MFSD3	113655	0.747943	-0.419	0.00024	1.337
	ILMN_1671766	F12	2161	1.34071	0.423	0.00059		ILMN_1767448	LHFP	NA	0.747943	-0.419	0.001458	1.337
	ILMN_2334303	SEC24B	10427	1.34071	0.423	0.00076		ILMN_2173835	FTHL3	NA	0.747943	-0.419	0.034332	1.337
	ILMN_1740960	MACROD1	28992	1.34071	0.423	0.001094		ILMN_2407824	ATP1B1	481	0.748462	-0.418	0.002945	1.33607
	ILMN_1700546	ELOVL6	79071	1.34071	0.423	0.001674		ILMN_1789733	CLIP3	25999	0.748462	-0.418	0.010744	1.33607
	ILMN_1716384	ATL2	64225	1.34071	0.423	0.003533		ILMN_2377240	AKTIP	64400	0.7495	-0.416	0.00129	1.33422
	ILMN_3240485	LOC100134498	NA	1.34071	0.423	0.00394		ILMN_1756910	PLA2G15	23659	0.7495	-0.416	0.002143	1.33422
	ILMN_2411915	ATG4B	23192	1.34071	0.423	0.007798		ILMN_1761968	PPP1R14A	94274	0.7495	-0.416	0.008349	1.33422
	ILMN_1780898	PRKCH	5583	1.34071	0.423	0.01129		ILMN_1807972	MICAL1	64780	0.7495	-0.416	0.010699	1.33422
	ILMN_1808301	MRPL45	84311	1.34071	0.423	0.019843		ILMN_2082209	C20ORF100	NA	0.750019	-0.415	0.000658	1.3333
	ILMN_2090802	TMEM79	84283	1.33978	0.422	0.000424		ILMN_1703692	LOC647000	NA	0.750019	-0.415	0.001746	1.3333
	ILMN_3277905	LOC645313	NA	1.33978	0.422	0.001164		ILMN_1780058	DEGS1	8560	0.750019	-0.415	0.002787	1.3333
	ILMN_1707534	NKRF	55922	1.33978	0.422	0.001219		ILMN_2412807	DCTN1	1639	0.750019	-0.415	0.021395	1.3333
	ILMN_1756793	POLS	NA	1.33978	0.422	0.002542		ILMN_2349610	DPH3	285381	0.75054	-0.414	0.000957	1.33237
	ILMN_1729546	C19ORF54	NA	1.33978	0.422	0.002793		ILMN_1709814	NMRAL1	57407	0.75054	-0.414	0.001626	1.33237
	ILMN_1765401	RRN3	54700	1.33978	0.422	0.003872		ILMN_1810334	COMMD7	149951	0.75054	-0.414	0.001797	1.33237
	ILMN_1734312	GCN1L1	NA	1.33978	0.422	0.005373		ILMN_1789001	SLC35B2	347734	0.75106	-0.413	0.00064	1.33145
	ILMN_1654920	HNRPH3	NA	1.33978	0.422	0.00863		ILMN_1660341	LRPAP1	4043	0.75106	-0.413	0.00434	1.33145
	ILMN_1708502	AFF4	27125	1.33978	0.422	0.012741		ILMN_1672947	CAST	831	0.75106	-0.413	0.019467	1.33145
	ILMN_3308225	MIR1282	100302254	1.33978	0.422	0.019024		ILMN_1786105	PCBD1	5092	0.751581	-0.412	0.001423	1.33053
	ILMN_1787064	ANKRD17	26057	1.33886	0.421	0.000433		ILMN_1706015	FAM43A	131583	0.751581	-0.412	0.002391	1.33053
	ILMN_1786328	WDR40A	NA	1.33886	0.421	0.00064		ILMN_1763011	C7ORF10	NA	0.752102	-0.411	0.006364	1.32961
	ILMN_1736096	DLL3	10683	1.33886	0.421	0.001182		ILMN_1652128	LMBRD1	55788	0.752102	-0.411	0.026092	1.32961
	ILMN_1745513	MCAT	27349	1.33886	0.421	0.001311		ILMN_1657977	MSRB2	22921	0.752623	-0.41	0.010234	1.32869
	ILMN_1766000	PM20D2	135293	1.33886	0.421	0.004065		ILMN_1764158	NLGN2	57555	0.752623	-0.41	0.038691	1.32869
	ILMN_1811957	CAMSAP1	157922	1.33793	0.42	0.000123		ILMN_1702835	SH3BGRL	6451	0.753145	-0.409	0.008748	1.32777
	ILMN_2227968	NTHL1	4913	1.33793	0.42	0.000221		ILMN_1691106	LOC729692	NA	0.753145	-0.409	0.025087	1.32777
	ILMN_1670878	YTHDC1	91746	1.33793	0.42	0.00073		ILMN_1657475	GALT	2592	0.753668	-0.408	0.000375	1.32685
	ILMN_1723235	DUS3L	56931	1.33793	0.42	0.001072		ILMN_1707084	UBE2D4	51619	0.753668	-0.408	0.000609	1.32685
	ILMN_1754121	CSK	1445	1.33793	0.42	0.002672		ILMN_1733110	RASSF7	8045	0.753668	-0.408	0.000652	1.32685
	ILMN_1788213	FRAT2	23401	1.33793	0.42	0.002786		ILMN_1659463	APAF1	317	0.75419	-0.407	0.032451	1.32593
	ILMN_1796113	BCDIN3D	144233	1.337	0.419	0.002731		ILMN_1784352	CCM2	83605	0.754713	-0.406	0.002088	1.32501
	ILMN_3235113	TOMM6	100188893	1.337	0.419	0.003068		ILMN_1765204	ST13	6767	0.754713	-0.406	0.002236	1.32501
	ILMN_1762103	WDR48	57599	1.337	0.419	0.003081		ILMN_1672004	TOB1	10140	0.754713	-0.406	0.00952	1.32501
	ILMN_1789510	STIP1	10963	1.337	0.419	0.003142		ILMN_1682567	CCDC106	29903	0.755236	-0.405	7.8e-05	1.32409
	ILMN_1664833	MRPL50	54534	1.337	0.419	0.021305		ILMN_1794505	SHFM1	NA	0.755236	-0.405	0.000471	1.32409
	ILMN_1760143	ADRM1	11047	1.33607	0.418	0.000164		ILMN_2327346	SSBP4	170463	0.755236	-0.405	0.001206	1.32409
	ILMN_1672728	KCTD5	54442	1.33607	0.418	0.00074		ILMN_1651735	TGOLN2	10618	0.755236	-0.405	0.004175	1.32409
	ILMN_3217815	LOC646294	NA	1.33607	0.418	0.001109		ILMN_1695432	TPST2	8459	0.75576	-0.404	0.001884	1.32317
	ILMN_1722905	MRPS11	64963	1.33607	0.418	0.001344		ILMN_1671404	SVIL	6840	0.756284	-0.403	0.000336	1.32225
	ILMN_1911605	HS.334831	NA	1.33607	0.418	0.001621		ILMN_1879496	HS.272065	NA	0.756808	-0.402	0.001514	1.32134
	ILMN_1705093	ORC5L	NA	1.33607	0.418	0.004045		ILMN_3247452	LOC100128731	NA	0.757333	-0.401	0.002182	1.32042
	ILMN_3263329	GAR1	54433	1.33607	0.418	0.005314		ILMN_1749521	SLC35E3	55508	0.757333	-0.401	0.004175	1.32042
	ILMN_1695719	EIF2C2	NA	1.33515	0.417	0.001229		ILMN_1751258	NDUFA4	4697	0.757858	-0.4	0.003019	1.31951
	ILMN_2321485	PPP1R8	5511	1.33515	0.417	0.001513		ILMN_2334760	ARMCX3	51566	0.757858	-0.4	0.008831	1.31951
	ILMN_2412922	C14ORF43	NA	1.33515	0.417	0.005155		ILMN_3241354	LOC390660	NA	0.757858	-0.4	0.037035	1.31951
	ILMN_1723843	CSNK2A2	1459	1.33515	0.417	0.033168		ILMN_1803788	LGALS3	3958	0.758384	-0.399	0.007999	1.31859
	ILMN_2392635	ABCF1	23	1.33422	0.416	0.000148		ILMN_1721876	TIMP2	7077	0.758384	-0.399	0.010315	1.31859
	ILMN_1760620	TMEM33	55161	1.33422	0.416	0.006753		ILMN_1672878	ABR	29	0.75891	-0.398	0.000229	1.31768
	ILMN_1771601	UFSP1	402682	1.3333	0.415	0.000431		ILMN_1665909	LASP1	3927	0.75891	-0.398	0.002334	1.31768
	ILMN_2054233	SENP6	26054	1.3333	0.415	0.000859		ILMN_2299612	TMEM150A	129303	0.75891	-0.398	0.007904	1.31768
	ILMN_1746579	UBE2O	63893	1.3333	0.415	0.003528		ILMN_1768505	IL13RA1	3597	0.759436	-0.397	0.000252	1.31677
	ILMN_2275248	ECE2	9718	1.3333	0.415	0.007863		ILMN_1711909	EDEM2	55741	0.759436	-0.397	0.003335	1.31677
	ILMN_1762725	EIF3L	51386	1.3333	0.415	0.032246		ILMN_1657050	ARSK	153642	0.759436	-0.397	0.005676	1.31677
	ILMN_1737535	TAF4	6874	1.33237	0.414	0.000842		ILMN_1801118	C16ORF33	NA	0.759436	-0.397	0.007161	1.31677
	ILMN_1729179	SPATA5L1	79029	1.33237	0.414	0.000923		ILMN_2060086	ADAM23	8745	0.759436	-0.397	0.041442	1.31677
	ILMN_1693702	MRFAP1L1	114932	1.33237	0.414	0.001049		ILMN_1667707	SPCS3	60559	0.759962	-0.396	0.002456	1.31585
	ILMN_1686401	LOC728739	728739	1.33237	0.414	0.00146		ILMN_1800412	BMP1	649	0.759962	-0.396	0.003404	1.31585
	ILMN_1719205	FBL	2091	1.33237	0.414	0.00249		ILMN_1687301	VCAN	1462	0.759962	-0.396	0.027291	1.31585
	ILMN_1651385	MFN2	9927	1.33237	0.414	0.006757		ILMN_2098126	CCL5	6352	0.759962	-0.396	0.046016	1.31585
	ILMN_3248758	LOC728934	NA	1.33237	0.414	0.009481		ILMN_1771261	SYNC1	NA	0.760489	-0.395	0.001175	1.31494
	ILMN_1760256	RBM22	55696	1.33145	0.413	0.000104		ILMN_1778321	SLC2A6	11182	0.760489	-0.395	0.002299	1.31494
	ILMN_1715636	EIF3B	8662	1.33145	0.413	0.000949		ILMN_1728426	INPPL1	3636	0.760489	-0.395	0.002673	1.31494
	ILMN_2368713	TMEM189-UBE2V1	387522	1.33145	0.413	0.005201		ILMN_1773063	OSBPL1A	114876	0.760489	-0.395	0.007059	1.31494
	ILMN_2374244	DYRK2	8445	1.33145	0.413	0.009109		ILMN_3307729	CXXC5	51523	0.760489	-0.395	0.010655	1.31494
	ILMN_1690690	SEC23IP	11196	1.33053	0.412	0.000289		ILMN_1651950	TPST1	8460	0.761017	-0.394	0.001856	1.31403
	ILMN_1786601	PLAGL2	5326	1.33053	0.412	0.000764		ILMN_1752478	DHRS3	9249	0.761017	-0.394	0.011421	1.31403
	ILMN_1783285	CTPS	NA	1.33053	0.412	0.001457		ILMN_1654287	ADCY9	115	0.761017	-0.394	0.035836	1.31403
	ILMN_1674633	UBE2H	7328	1.33053	0.412	0.006519		ILMN_1786273	C1ORF122	NA	0.761544	-0.393	0.003251	1.31312
	ILMN_1760303	PIK3R1	5295	1.33053	0.412	0.007161		ILMN_2207363	RABAC1	10567	0.761544	-0.393	0.006719	1.31312
	ILMN_3202432	LOC644464	NA	1.33053	0.412	0.022171		ILMN_1751330	RBCK1	10616	0.761544	-0.393	0.011593	1.31312
	ILMN_1728514	BAG5	9529	1.32961	0.411	0.003938		ILMN_2152502	MGC72080	NA	0.761544	-0.393	0.014269	1.31312
	ILMN_1800855	PPTC7	160760	1.32961	0.411	0.00424		ILMN_1816342	HS.534061	NA	0.761544	-0.393	0.027041	1.31312
	ILMN_1694504	RNF220	55182	1.32869	0.41	0.000159		ILMN_1788250	LDOC1	23641	0.761544	-0.393	0.034933	1.31312
	ILMN_2332990	DIABLO	56616	1.32869	0.41	0.000477		ILMN_1676665	CUEDC1	404093	0.762072	-0.392	0.005416	1.31221
	ILMN_1725644	UBE2D2	7322	1.32869	0.41	0.00087		ILMN_1657708	MGLL	11343	0.762072	-0.392	0.008148	1.31221
	ILMN_1779584	UTP18	51096	1.32777	0.409	0.002666		ILMN_1660533	RPN1	6184	0.762072	-0.392	0.010509	1.31221
	ILMN_1704672	OBFC2B	NA	1.32777	0.409	0.00309		ILMN_1735045	A4GALT	53947	0.762072	-0.392	0.010918	1.31221
	ILMN_1721922	NAB2	4665	1.32777	0.409	0.01178		ILMN_1783695	EPRS	NA	0.762601	-0.391	0.004383	1.3113
	ILMN_1803060	MAML1	9794	1.32777	0.409	0.018154		ILMN_1802458	AGTRAP	57085	0.762601	-0.391	0.008742	1.3113
	ILMN_1801122	LOC401317	NA	1.32685	0.408	0.000932		ILMN_2115862	ESPNL	339768	0.762601	-0.391	0.012299	1.3113
	ILMN_1774890	LAS1L	81887	1.32685	0.408	0.001688		ILMN_1685286	PPP1R12C	54776	0.762601	-0.391	0.013701	1.3113
	ILMN_1658259	DRG1	4733	1.32685	0.408	0.022023		ILMN_2281810	PSG4	5672	0.762601	-0.391	0.01389	1.3113
	ILMN_2124352	DCUN1D5	84259	1.32593	0.407	0.004917		ILMN_2388507	AKT1	207	0.762601	-0.391	0.015071	1.3113
	ILMN_1858599	HS.20255	NA	1.32593	0.407	0.006187		ILMN_1740180	SNX3	8724	0.76313	-0.39	0.001204	1.31039
	ILMN_1684278	SNORD38A	94162	1.32593	0.407	0.006833		ILMN_1754529	SPG7	6687	0.76313	-0.39	0.004574	1.31039
	ILMN_2251978	C21ORF66	NA	1.32593	0.407	0.025491		ILMN_1704385	LOC347376	NA	0.76313	-0.39	0.005204	1.31039
	ILMN_1689446	EIF3G	8666	1.32501	0.406	0.005738		ILMN_2325506	BCAS4	55653	0.76313	-0.39	0.007394	1.31039
	ILMN_1790136	C20ORF20	NA	1.32409	0.405	0.000284		ILMN_1801776	PSG9	5678	0.76313	-0.39	0.015788	1.31039
	ILMN_3239113	LOC144438	NA	1.32409	0.405	0.000838		ILMN_1813746	CORO2A	7464	0.763659	-0.389	0.004979	1.30949
	ILMN_1774028	MTFR1	9650	1.32409	0.405	0.001411		ILMN_3245314	LOC100133999	NA	0.763659	-0.389	0.009102	1.30949
	ILMN_1775269	EID1	23741	1.32409	0.405	0.001751		ILMN_1716056	LMF2	91289	0.764188	-0.388	0.003203	1.30858
	ILMN_1668834	RSF1	51773	1.32409	0.405	0.002466		ILMN_1767556	C10ORF10	NA	0.764188	-0.388	0.007836	1.30858
	ILMN_1815759	CTDP1	9150	1.32409	0.405	0.005595		ILMN_2103919	LRFN3	79414	0.764188	-0.388	0.009955	1.30858
	ILMN_1766916	RPAP3	79657	1.32409	0.405	0.015581		ILMN_1782292	LAMP1	3916	0.764188	-0.388	0.012449	1.30858
	ILMN_1783840	FLJ42986	NA	1.32317	0.404	0.000304		ILMN_1701877	AXL	558	0.764188	-0.388	0.015295	1.30858
	ILMN_2351930	TRIM33	51592	1.32317	0.404	0.000444		ILMN_2329165	MYO1C	4641	0.764718	-0.387	0.001843	1.30767
	ILMN_1724826	DNM1L	10059	1.32317	0.404	0.002636		ILMN_1708204	COPG	NA	0.764718	-0.387	0.013023	1.30767
	ILMN_3247064	SNRNP40	9410	1.32317	0.404	0.005806		ILMN_2387995	ANTXR1	84168	0.764718	-0.387	0.03366	1.30767
	ILMN_1747241	IWS1	55677	1.32317	0.404	0.011095		ILMN_1728498	PCBP4	57060	0.765248	-0.386	0.001495	1.30677
	ILMN_1703946	ADORA2B	136	1.32225	0.403	0.00076		ILMN_1738759	PIGT	51604	0.765248	-0.386	0.001972	1.30677
	ILMN_2387636	ITGB4BP	NA	1.32225	0.403	0.002307		ILMN_1676563	HTRA1	5654	0.765248	-0.386	0.00213	1.30677
	ILMN_1665423	ZFP91	80829	1.32225	0.403	0.003332		ILMN_1792508	TMEM59	9528	0.765779	-0.385	0.002027	1.30586
	ILMN_1696532	RBBP5	5929	1.32225	0.403	0.008542		ILMN_1804955	CTSF	8722	0.765779	-0.385	0.002129	1.30586
	ILMN_1661594	C2ORF42	NA	1.32134	0.402	0.00264		ILMN_1731287	ARFGAP3	26286	0.765779	-0.385	0.006485	1.30586
	ILMN_1776109	ZNF622	90441	1.32134	0.402	0.005648		ILMN_2064606	TBC1D2B	23102	0.76631	-0.384	0.000642	1.30495
	ILMN_1717868	CCT8	10694	1.32134	0.402	0.006008		ILMN_1755364	RALA	5898	0.76631	-0.384	0.00131	1.30495
	ILMN_1708164	EIF3A	8661	1.32134	0.402	0.007879		ILMN_1674021	LOC646869	NA	0.76631	-0.384	0.003246	1.30495
	ILMN_3245869	LOC440957	NA	1.32134	0.402	0.029122		ILMN_1766157	MRVI1	10335	0.76631	-0.384	0.00527	1.30495
	ILMN_1685779	FOXR1	283150	1.32134	0.402	0.035888		ILMN_2130411	KDELR1	10945	0.76631	-0.384	0.010807	1.30495
	ILMN_1759495	XPO5	57510	1.32042	0.401	0.000786		ILMN_2356654	LGALS8	3964	0.76631	-0.384	0.012242	1.30495
	ILMN_1663383	GEMIN5	25929	1.32042	0.401	0.001525		ILMN_1725314	GBP3	2635	0.76631	-0.384	0.016772	1.30495
	ILMN_1655796	MARCH3	NA	1.32042	0.401	0.002198		ILMN_1690099	ITGB1BP1	9270	0.766841	-0.383	0.00752	1.30405
	ILMN_1701374	NUP35	129401	1.32042	0.401	0.00344		ILMN_1688295	ZNF219	51222	0.766841	-0.383	0.009623	1.30405
	ILMN_1799488	ZNF383	163087	1.31951	0.4	0.000867		ILMN_1662973	CD82	3732	0.767373	-0.382	0.00057	1.30315
	ILMN_3177122	LOC100127910	NA	1.31951	0.4	0.002203		ILMN_1774596	BSCL2	26580	0.767373	-0.382	0.000623	1.30315
	ILMN_1761181	NOL9	79707	1.31951	0.4	0.002764		ILMN_1709307	GPSM1	26086	0.767373	-0.382	0.002253	1.30315
	ILMN_1676765	LOC390354	NA	1.31951	0.4	0.003635		ILMN_2412624	TP53I11	9537	0.767373	-0.382	0.005596	1.30315
	ILMN_1770356	POLRMT	5442	1.31859	0.399	0.000163		ILMN_1675038	PRMT2	3275	0.767905	-0.381	0.001879	1.30224
	ILMN_1666409	PSMB6	5694	1.31859	0.399	0.000225		ILMN_1785336	PMM2	5373	0.767905	-0.381	0.002065	1.30224
	ILMN_1778238	UTP6	55813	1.31859	0.399	0.000886		ILMN_1687440	HIPK2	28996	0.767905	-0.381	0.016955	1.30224
	ILMN_1664216	NKIRAS1	28512	1.31859	0.399	0.002042		ILMN_1746561	BCL2L2	599	0.768438	-0.38	0.000275	1.30134
	ILMN_2306066	FUS	2521	1.31859	0.399	0.002102		ILMN_1653861	SCMH1	22955	0.768438	-0.38	0.001746	1.30134
	ILMN_1745772	ASCC3	10973	1.31859	0.399	0.00324		ILMN_2376263	SMARCA1	6594	0.768438	-0.38	0.002956	1.30134
	ILMN_1672287	MYNN	55892	1.31859	0.399	0.003284		ILMN_1766637	GLA	2717	0.76897	-0.379	0.002189	1.30044
	ILMN_1809139	AHCTF1	25909	1.31859	0.399	0.004869		ILMN_1787680	SELS	NA	0.76897	-0.379	0.002288	1.30044
	ILMN_2050617	CCT6P1	643253	1.31859	0.399	0.010946		ILMN_1725241	GSTK1	373156	0.76897	-0.379	0.004339	1.30044
	ILMN_1746408	MIDN	90007	1.31859	0.399	0.010987		ILMN_3190972	LOC100130291	NA	0.76897	-0.379	0.005242	1.30044
	ILMN_1723871	OTUB1	55611	1.31859	0.399	0.015071		ILMN_1813846	P2RX4	5025	0.76897	-0.379	0.00696	1.30044
	ILMN_1667043	EIF4A3	9775	1.31768	0.398	0.000842		ILMN_1751708	ITM2B	9445	0.76897	-0.379	0.009619	1.30044
	ILMN_1760441	MRPS5	64969	1.31768	0.398	0.001722		ILMN_1694491	CCNG1	900	0.76897	-0.379	0.021751	1.30044
	ILMN_2335398	CECR5	NA	1.31768	0.398	0.006319		ILMN_1709334	TM9SF1	10548	0.769504	-0.378	0.007798	1.29954
	ILMN_1756806	MCL1	4170	1.31768	0.398	0.016855		ILMN_1790384	LOC654202	NA	0.769504	-0.378	0.014241	1.29954
	ILMN_1692473	PRMT1	3276	1.31677	0.397	0.000195		ILMN_1742534	COL4A5	1287	0.769504	-0.378	0.046238	1.29954
	ILMN_1737005	C19ORF61	NA	1.31677	0.397	0.000885		ILMN_1682095	RCOR3	55758	0.770037	-0.377	0.00035	1.29864
	ILMN_3242205	GMPS	8833	1.31677	0.397	0.003157		ILMN_1668559	RGS10	6001	0.770037	-0.377	0.000441	1.29864
	ILMN_1717337	MARCH7	NA	1.31677	0.397	0.031044		ILMN_1729455	EML1	2009	0.770037	-0.377	0.001106	1.29864
	ILMN_1706246	CCT5	22948	1.31585	0.396	0.000345		ILMN_1670708	F10	2159	0.770037	-0.377	0.0014	1.29864
	ILMN_1655950	ZHX1	11244	1.31585	0.396	0.002855		ILMN_2405018	PPP1CB	5500	0.770037	-0.377	0.022981	1.29864
	ILMN_1737298	MAT2A	4144	1.31585	0.396	0.003476		ILMN_1815012	EXOC7	23265	0.770571	-0.376	0.001697	1.29774
	ILMN_1704472	EID2	163126	1.31585	0.396	0.004138		ILMN_3236821	HSPBL2	NA	0.770571	-0.376	0.004151	1.29774
	ILMN_1751571	RAD23A	5886	1.31585	0.396	0.0082		ILMN_1653501	SEMA3B	7869	0.770571	-0.376	0.005536	1.29774
	ILMN_1718354	INTS7	25896	1.31494	0.395	0.001998		ILMN_1810782	SH3KBP1	30011	0.771105	-0.375	0.001355	1.29684
	ILMN_1670420	METAP2	10988	1.31494	0.395	0.003384		ILMN_1755120	MAN1A2	10905	0.771105	-0.375	0.001904	1.29684
	ILMN_1678934	POLR1E	64425	1.31494	0.395	0.004419		ILMN_1678678	SLC37A4	2542	0.771105	-0.375	0.002113	1.29684
	ILMN_2264625	NIPBL	25836	1.31494	0.395	0.007784		ILMN_1708167	CDCP1	64866	0.771105	-0.375	0.00527	1.29684
	ILMN_1718132	ECHS1	1892	1.31494	0.395	0.018838		ILMN_2106902	CHES1	NA	0.771105	-0.375	0.01659	1.29684
	ILMN_1751589	NUDCD2	134492	1.31494	0.395	0.034313		ILMN_1765076	APPL2	55198	0.771105	-0.375	0.01746	1.29684
	ILMN_2410772	KEAP1	9817	1.31403	0.394	0.00152		ILMN_1702363	SULF1	23213	0.77164	-0.374	0.000917	1.29594
	ILMN_1785933	C19ORF18	NA	1.31403	0.394	0.001683		ILMN_1731374	CPE	1363	0.77164	-0.374	0.001206	1.29594
	ILMN_3300744	LOC728666	NA	1.31403	0.394	0.002405		ILMN_2381476	SPG3A	NA	0.77164	-0.374	0.005187	1.29594
	ILMN_1658080	ZNF573	126231	1.31403	0.394	0.014173		ILMN_1779071	FEZ1	9638	0.77164	-0.374	0.009503	1.29594
	ILMN_1676010	SP1	6667	1.31312	0.393	0.000477		ILMN_1660718	GABBR2	9568	0.772175	-0.373	0.005112	1.29504
	ILMN_1671742	UPF3A	65110	1.31312	0.393	0.001323		ILMN_1714567	AHNAK	79026	0.772175	-0.373	0.013075	1.29504
	ILMN_1728435	C12ORF45	NA	1.31312	0.393	0.002454		ILMN_3307926	ADRBK1	NA	0.77271	-0.372	0.002681	1.29415
	ILMN_1693668	KIAA0261	NA	1.31312	0.393	0.005641		ILMN_1697629	PLA2G4B	100137049	0.773246	-0.371	0.001606	1.29325
	ILMN_1772132	ATP5B	NA	1.31312	0.393	0.007128		ILMN_1795341	SFRS1	NA	0.773246	-0.371	0.005148	1.29325
	ILMN_1738681	NUP62	23636	1.31312	0.393	0.011829		ILMN_2155480	RAB43	339122	0.773246	-0.371	0.007416	1.29325
	ILMN_3251440	PIK3C2A	5286	1.31312	0.393	0.025207		ILMN_2065690	GRAMD3	NA	0.773783	-0.37	0.003371	1.29235
	ILMN_2129349	TSSC1	NA	1.31221	0.392	0.000629		ILMN_3262936	LCLAT1	253558	0.773783	-0.37	0.007109	1.29235
	ILMN_1813766	RCL1	10171	1.31221	0.392	0.000664		ILMN_1712431	FAM113B	NA	0.774319	-0.369	0.000921	1.29146
	ILMN_1750718	TNRC15	NA	1.31221	0.392	0.001962		ILMN_1673478	C5ORF5	NA	0.774319	-0.369	0.001329	1.29146
	ILMN_2115154	NUPL2	NA	1.31221	0.392	0.003574		ILMN_1774836	PLOD3	8985	0.774319	-0.369	0.001762	1.29146
	ILMN_1692620	ZNF263	10127	1.31221	0.392	0.014609		ILMN_1767111	ANO10	55129	0.774319	-0.369	0.027157	1.29146
	ILMN_1742031	IFRD2	7866	1.31221	0.392	0.048503		ILMN_1747556	CDK9	1025	0.774856	-0.368	0.004358	1.29056
	ILMN_1810474	UBE2I	7329	1.3113	0.391	0.000157		ILMN_1788783	TRAM2	9697	0.774856	-0.368	0.004612	1.29056
	ILMN_1711627	SIAH1	6477	1.3113	0.391	0.000227		ILMN_1736806	PAG1	55824	0.774856	-0.368	0.008844	1.29056
	ILMN_1667790	C21ORF100	NA	1.3113	0.391	0.00033		ILMN_1770071	IFITM4P	340198	0.774856	-0.368	0.019034	1.29056
	ILMN_1773716	MRPL9	65005	1.3113	0.391	0.000436		ILMN_1734950	LOXL1	4016	0.774856	-0.368	0.04357	1.29056
	ILMN_1802905	PIAS4	51588	1.3113	0.391	0.001621		ILMN_1696099	ALDH4A1	8659	0.775393	-0.367	0.000986	1.28967
	ILMN_1752394	CCNB1IP1	57820	1.3113	0.391	0.001965		ILMN_1670609	ATOX1	475	0.775393	-0.367	0.001744	1.28967
	ILMN_1781516	SUPT16H	11198	1.3113	0.391	0.003558		ILMN_1770245	EPB41L5	57669	0.775393	-0.367	0.002456	1.28967
	ILMN_3306742	SIGMAR1	10280	1.3113	0.391	0.006685		ILMN_1788192	ARMCX1	51309	0.775393	-0.367	0.003936	1.28967
	ILMN_2155516	QTRTD1	NA	1.31039	0.39	0.001395		ILMN_1795639	MGMT	4255	0.775393	-0.367	0.013556	1.28967
	ILMN_1712035	TMEM115	11070	1.31039	0.39	0.001972		ILMN_1745501	DNALI1	7802	0.775931	-0.366	0.005928	1.28877
	ILMN_1725787	RFX1	5989	1.31039	0.39	0.002869		ILMN_1791511	TMEM176A	55365	0.775931	-0.366	0.006311	1.28877
	ILMN_1682206	GCC1	79571	1.31039	0.39	0.00306		ILMN_1798379	NTM	50863	0.775931	-0.366	0.007742	1.28877
	ILMN_2170515	METTL11A	NA	1.31039	0.39	0.003329		ILMN_2347949	G6PD	2539	0.775931	-0.366	0.010083	1.28877
	ILMN_2097185	PUS3	83480	1.31039	0.39	0.004145		ILMN_2205896	MEIS3P1	4213	0.775931	-0.366	0.012179	1.28877
	ILMN_1665483	KIAA0020	NA	1.30949	0.389	0.002373		ILMN_3291053	LOC346085	NA	0.775931	-0.366	0.012216	1.28877
	ILMN_1676763	PIPSL	266971	1.30949	0.389	0.002388		ILMN_1708987	HSD11B1L	374875	0.775931	-0.366	0.013179	1.28877
	ILMN_1705310	VEZF1	7716	1.30949	0.389	0.003082		ILMN_1657810	PPM1M	132160	0.776469	-0.365	0.000753	1.28788
	ILMN_1676759	DDX27	55661	1.30949	0.389	0.004907		ILMN_1769810	ARL6IP5	10550	0.776469	-0.365	0.001904	1.28788
	ILMN_1702526	C17ORF48	NA	1.30949	0.389	0.007512		ILMN_1790311	SEC23A	10484	0.776469	-0.365	0.00601	1.28788
	ILMN_1718152	DEPDC7	91614	1.30949	0.389	0.010845		ILMN_3234837	PKDCC	91461	0.776469	-0.365	0.016269	1.28788
	ILMN_1769734	NT5C3	NA	1.30949	0.389	0.045593		ILMN_3246634	LOC100134108	NA	0.776469	-0.365	0.017795	1.28788
	ILMN_1715994	HGS	9146	1.30858	0.388	0.000202		ILMN_2319910	DGKA	1606	0.776469	-0.365	0.035937	1.28788
	ILMN_1713732	ABL1	25	1.30858	0.388	0.001879		ILMN_2352036	RTN4	57142	0.777007	-0.364	0.009681	1.28699
	ILMN_2323979	WARS2	10352	1.30858	0.388	0.002435		ILMN_2148469	RASL11B	65997	0.777007	-0.364	0.020782	1.28699
	ILMN_1784031	TIMM44	10469	1.30858	0.388	0.00248		ILMN_1727309	FAM82A2	NA	0.777007	-0.364	0.024328	1.28699
	ILMN_1755882	C13ORF7	NA	1.30858	0.388	0.004947		ILMN_1767068	SMAD6	4091	0.777007	-0.364	0.027335	1.28699
	ILMN_1794875	AGPAT9	NA	1.30767	0.387	0.001186		ILMN_2167805	LUM	4060	0.777007	-0.364	0.029027	1.28699
	ILMN_2393497	ATXN3	4287	1.30767	0.387	0.002832		ILMN_1780987	RFXANK	8625	0.777546	-0.363	0.006261	1.2861
	ILMN_1805543	ADAMTS9	56999	1.30767	0.387	0.003533		ILMN_1704619	VPS29	51699	0.777546	-0.363	0.008091	1.2861
	ILMN_1780756	RBM23	55147	1.30767	0.387	0.005419		ILMN_1652806	ATP5J	NA	0.777546	-0.363	0.015581	1.2861
	ILMN_1663002	STOML2	30968	1.30767	0.387	0.006155		ILMN_1777378	COMMD6	170622	0.778085	-0.362	0.001674	1.28521
	ILMN_1731064	CABC1	NA	1.30767	0.387	0.007542		ILMN_1771957	MAN1B1	11253	0.778085	-0.362	0.002405	1.28521
	ILMN_2182335	ARID2	196528	1.30767	0.387	0.01082		ILMN_1811682	CYLN2	NA	0.778085	-0.362	0.010559	1.28521
	ILMN_1755741	DACH1	1602	1.30767	0.387	0.019441		ILMN_1739751	SLC26A11	284129	0.778085	-0.362	0.011322	1.28521
	ILMN_2117716	SFRS17A	NA	1.30677	0.386	0.001566		ILMN_1665100	PTGS1	5742	0.778085	-0.362	0.011678	1.28521
	ILMN_2112049	DNLZ	728489	1.30677	0.386	0.008916		ILMN_1759743	SLC38A10	124565	0.778085	-0.362	0.015406	1.28521
	ILMN_2352042	MRPL4	51073	1.30677	0.386	0.014022		ILMN_1712707	ABHD8	79575	0.778625	-0.361	0.003108	1.28432
	ILMN_1705953	LONRF1	91694	1.30586	0.385	0.001175		ILMN_1794213	ABHD14A	25864	0.778625	-0.361	0.004199	1.28432
	ILMN_1743097	XRCC6	2547	1.30586	0.385	0.002918		ILMN_1668090	STK25	10494	0.778625	-0.361	0.004842	1.28432
	ILMN_1685954	HMBS	3145	1.30586	0.385	0.005344		ILMN_1702691	TNFAIP3	7128	0.778625	-0.361	0.00571	1.28432
	ILMN_1703459	WNT9B	7484	1.30586	0.385	0.008647		ILMN_1788778	SEPT11	NA	0.778625	-0.361	0.009787	1.28432
	ILMN_1804479	MRPL18	29074	1.30586	0.385	0.011907		ILMN_1743655	TMED9	54732	0.778625	-0.361	0.023431	1.28432
	ILMN_3237966	FBXL11	NA	1.30586	0.385	0.0156		ILMN_1783598	CAB39L	81617	0.779165	-0.36	0.000724	1.28343
	ILMN_2155228	CRLF3	51379	1.30495	0.384	0.007208		ILMN_1798212	LLGL1	3996	0.779165	-0.36	0.010427	1.28343
	ILMN_2077886	C1ORF109	NA	1.30495	0.384	0.010452		ILMN_1699545	PCSK7	9159	0.779165	-0.36	0.017359	1.28343
	ILMN_1804822	SRXN1	140809	1.30495	0.384	0.014446		ILMN_1687921	JMJD8	339123	0.779705	-0.359	0.001194	1.28254
	ILMN_1748476	NOP58	51602	1.30495	0.384	0.027326		ILMN_1658425	DAG1	1605	0.779705	-0.359	0.001718	1.28254
	ILMN_3193306	C14ORF109	NA	1.30405	0.383	0.000429		ILMN_1656940	ABLIM3	22885	0.779705	-0.359	0.006414	1.28254
	ILMN_1651262	HNRNPAB	3182	1.30405	0.383	0.00265		ILMN_1763732	KIAA0853	NA	0.779705	-0.359	0.015223	1.28254
	ILMN_1730329	CRSP6	NA	1.30405	0.383	0.003141		ILMN_1665235	CRTAP	10491	0.779705	-0.359	0.030394	1.28254
	ILMN_1718960	SERPINB8	5271	1.30315	0.382	0.001509		ILMN_1789074	HSPA1A	3303	0.780246	-0.358	0.009653	1.28165
	ILMN_1789384	QSOX2	169714	1.30315	0.382	0.002177		ILMN_1750273	RPL23AP7	118433	0.780246	-0.358	0.018552	1.28165
	ILMN_1702759	TMX4	56255	1.30315	0.382	0.002238		ILMN_1692058	NDN	4692	0.780246	-0.358	0.020374	1.28165
	ILMN_1782609	STAG2	10735	1.30315	0.382	0.003413		ILMN_1714383	TPD52L1	7164	0.780787	-0.357	0.00986	1.28076
	ILMN_3249949	C11ORF58	NA	1.30315	0.382	0.003533		ILMN_1692731	TTYH3	80727	0.780787	-0.357	0.019502	1.28076
	ILMN_1658619	WWC1	23286	1.30315	0.382	0.00542		ILMN_1705261	CAPN1	823	0.781328	-0.356	0.001809	1.27987
	ILMN_1688413	SNW1	22938	1.30315	0.382	0.005576		ILMN_1677043	AKR7A2	8574	0.781328	-0.356	0.003342	1.27987
	ILMN_1658486	MRPL54	116541	1.30315	0.382	0.006115		ILMN_1692133	ZNF226	7769	0.781328	-0.356	0.016022	1.27987
	ILMN_3239925	LOC25845	NA	1.30315	0.382	0.01999		ILMN_1680673	NT5DC1	221294	0.78187	-0.355	0.00213	1.27899
	ILMN_3228822	TMEM194A	NA	1.30315	0.382	0.03691		ILMN_3225795	LOC730032	NA	0.78187	-0.355	0.003533	1.27899
	ILMN_1685845	POLDIP3	84271	1.30224	0.381	0.002208		ILMN_2139100	SHISA5	51246	0.78187	-0.355	0.006335	1.27899
	ILMN_1730630	CXORF56	NA	1.30224	0.381	0.010024		ILMN_1803745	SUOX	6821	0.78187	-0.355	0.007878	1.27899
	ILMN_2345016	PTGES2	80142	1.30224	0.381	0.016317		ILMN_2200659	SNHG5	387066	0.78187	-0.355	0.013362	1.27899
	ILMN_2320336	CLK3	1198	1.30134	0.38	0.000632		ILMN_1711439	EMILIN1	11117	0.782412	-0.354	0.002629	1.2781
	ILMN_1727023	AMMECR1L	83607	1.30134	0.38	0.001453		ILMN_1790533	PHACTR2	9749	0.782412	-0.354	0.002967	1.2781
	ILMN_2176768	SEPHS1	22929	1.30134	0.38	0.002102		ILMN_1791396	DGCR6	8214	0.782412	-0.354	0.021233	1.2781
	ILMN_2090059	ZFY	7544	1.30134	0.38	0.002369		ILMN_1909886	HS.551847	NA	0.782412	-0.354	0.034403	1.2781
	ILMN_1679071	MTX3	345778	1.30134	0.38	0.006124		ILMN_1809537	MASP1	5648	0.782412	-0.354	0.045415	1.2781
	ILMN_1774685	IL24	11009	1.30134	0.38	0.006327		ILMN_1774982	CDC42EP5	148170	0.782954	-0.353	0.005084	1.27721
	ILMN_2341952	MRPL35	51318	1.30134	0.38	0.00654		ILMN_1765146	IFNAR2	3455	0.782954	-0.353	0.005658	1.27721
	ILMN_2402600	GLIS3	169792	1.30134	0.38	0.009414		ILMN_1654151	COX6C	1345	0.782954	-0.353	0.0082	1.27721
	ILMN_2207539	RPS17	6218	1.30134	0.38	0.0165		ILMN_1803194	GALK1	2584	0.782954	-0.353	0.010676	1.27721
	ILMN_1664956	SSU72	29101	1.30044	0.379	0.000456		ILMN_1769299	MTMR11	10903	0.782954	-0.353	0.036216	1.27721
	ILMN_1782922	PDE4B	5142	1.30044	0.379	0.000986		ILMN_1655296	UTRN	7402	0.782954	-0.353	0.037671	1.27721
	ILMN_1770035	NCOA5	57727	1.30044	0.379	0.001338		ILMN_2274180	MKKS	8195	0.782954	-0.353	0.03825	1.27721
	ILMN_2287888	PSMC4	5704	1.30044	0.379	0.002145		ILMN_1751753	IDH2	3418	0.783497	-0.352	0.005752	1.27633
	ILMN_2385191	QRICH1	54870	1.30044	0.379	0.003142		ILMN_3251341	TUBA1C	84790	0.783497	-0.352	0.005907	1.27633
	ILMN_1743187	C6ORF120	NA	1.30044	0.379	0.007421		ILMN_2072101	C4ORF49	NA	0.783497	-0.352	0.011599	1.27633
	ILMN_1716053	AK2	204	1.30044	0.379	0.008148		ILMN_1699856	RALGDS	5900	0.784041	-0.351	0.000664	1.27544
	ILMN_1666648	PRPF40A	55660	1.30044	0.379	0.022258		ILMN_1676036	LOC649679	NA	0.784041	-0.351	0.008089	1.27544
	ILMN_1671123	LOC647543	NA	1.29954	0.378	0.00439		ILMN_2390472	TTC14	151613	0.784041	-0.351	0.015463	1.27544
	ILMN_1660193	ZNF529	57711	1.29954	0.378	0.006012		ILMN_1764571	ARHGAP23	57636	0.784584	-0.35	0.015108	1.27456
	ILMN_1696133	SELI	NA	1.29954	0.378	0.01129		ILMN_1800276	RCN1	5954	0.784584	-0.35	0.024851	1.27456
	ILMN_1712298	ANKRD46	157567	1.29954	0.378	0.012623		ILMN_1806634	NNT	23530	0.785128	-0.349	0.010275	1.27368
	ILMN_1698463	ILF3	3609	1.29864	0.377	0.001119		ILMN_1682996	VWA5A	4013	0.785128	-0.349	0.015328	1.27368
	ILMN_1748488	TXNL4B	54957	1.29864	0.377	0.006187		ILMN_1772239	LOC400406	NA	0.785128	-0.349	0.019106	1.27368
	ILMN_2135798	NR2C2AP	126382	1.29864	0.377	0.010087		ILMN_1713892	C4ORF34	NA	0.785672	-0.348	0.001254	1.27279
	ILMN_1738558	RGS20	8601	1.29864	0.377	0.010572		ILMN_1718610	ARHGAP17	55114	0.785672	-0.348	0.004834	1.27279
	ILMN_2223380	PPWD1	23398	1.29864	0.377	0.012376		ILMN_2132809	ARHGEF10	9639	0.786217	-0.347	0.003252	1.27191
	ILMN_1672662	SLC20A1	6574	1.29864	0.377	0.016133		ILMN_1674337	FKBP2	2286	0.786217	-0.347	0.00733	1.27191
	ILMN_1771841	FOSL1	8061	1.29864	0.377	0.03254		ILMN_1805225	LPCAT3	10162	0.786217	-0.347	0.01149	1.27191
	ILMN_2062112	ZC3H15	55854	1.29864	0.377	0.037598		ILMN_1777881	TSPAN17	26262	0.786217	-0.347	0.022071	1.27191
	ILMN_1764629	SLC39A14	23516	1.29774	0.376	0.002358		ILMN_1779163	C11ORF67	NA	0.786762	-0.346	0.001583	1.27103
	ILMN_1809034	GATC	283459	1.29774	0.376	0.011707		ILMN_1815500	ITPR3	3710	0.786762	-0.346	0.002467	1.27103
	ILMN_1779190	ALKBH8	91801	1.29774	0.376	0.015071		ILMN_1743582	NUDT22	84304	0.786762	-0.346	0.004222	1.27103
	ILMN_1697959	SLC35B4	84912	1.29684	0.375	0.001914		ILMN_2071937	ATP6V0E1	8992	0.786762	-0.346	0.004574	1.27103
	ILMN_1758674	TMEM93	NA	1.29684	0.375	0.003987		ILMN_1722798	PLCD3	113026	0.786762	-0.346	0.039653	1.27103
	ILMN_1750518	THOC4	NA	1.29684	0.375	0.00495		ILMN_1696065	SDF4	51150	0.787308	-0.345	0.002253	1.27015
	ILMN_2401769	PHF14	9678	1.29684	0.375	0.006281		ILMN_1802971	FAM160B2	64760	0.787308	-0.345	0.003457	1.27015
	ILMN_1677466	DUSP6	1848	1.29684	0.375	0.006753		ILMN_1815086	NINJ1	4814	0.787308	-0.345	0.008865	1.27015
	ILMN_2356895	MRPL42	28977	1.29684	0.375	0.006958		ILMN_2222688	TMSB4X	7114	0.787308	-0.345	0.020869	1.27015
	ILMN_1707232	EBF3	253738	1.29684	0.375	0.007216		ILMN_1694530	DDA1	79016	0.787854	-0.344	0.003558	1.26927
	ILMN_2339284	CHD2	1106	1.29684	0.375	0.007671		ILMN_2220187	GFPT1	2673	0.787854	-0.344	0.004422	1.26927
	ILMN_1688011	UPF1	5976	1.29594	0.374	0.000417		ILMN_2361570	SNX14	57231	0.7884	-0.343	0.002165	1.26839
	ILMN_1663640	MAOA	4128	1.29594	0.374	0.000521		ILMN_1732452	MAPKAPK3	7867	0.7884	-0.343	0.027732	1.26839
	ILMN_1801101	ZBTB48	3104	1.29594	0.374	0.000693		ILMN_2213558	TMED10P	NA	0.788947	-0.342	0.008528	1.26751
	ILMN_1760858	RAB8A	4218	1.29594	0.374	0.001171		ILMN_1709750	SUSD1	64420	0.788947	-0.342	0.023295	1.26751
	ILMN_3236428	TMEM170B	100113407	1.29594	0.374	0.003017		ILMN_1693538	STK36	27148	0.788947	-0.342	0.043439	1.26751
	ILMN_1695853	CLK4	57396	1.29594	0.374	0.003349		ILMN_1801223	WTIP	126374	0.789494	-0.341	0.006331	1.26663
	ILMN_2246661	FAHD1	81889	1.29594	0.374	0.003482		ILMN_1680652	SELENBP1	8991	0.789494	-0.341	0.007478	1.26663
	ILMN_1730391	MRPS18A	55168	1.29594	0.374	0.006723		ILMN_1709623	MAPK7	5598	0.789494	-0.341	0.01015	1.26663
	ILMN_1787691	CITED4	163732	1.29594	0.374	0.009787		ILMN_3254984	LOC100129759	NA	0.789494	-0.341	0.049446	1.26663
	ILMN_1685679	RNF146	81847	1.29594	0.374	0.014958		ILMN_1660021	M6PRBP1	NA	0.790041	-0.34	0.001293	1.26576
	ILMN_2278518	NFATC2IP	84901	1.29594	0.374	0.02713		ILMN_1713807	MAN1C1	57134	0.790041	-0.34	0.006252	1.26576
	ILMN_1751378	RARS	NA	1.29504	0.373	0.000569		ILMN_1667295	VASN	114990	0.790041	-0.34	0.01633	1.26576
	ILMN_1755664	RPS26	6231	1.29504	0.373	0.001193		ILMN_1703314	KLHL36	79786	0.790041	-0.34	0.021383	1.26576
	ILMN_1798354	PAPOLA	10914	1.29504	0.373	0.003103		ILMN_1767827	GRK7	131890	0.790041	-0.34	0.035841	1.26576
	ILMN_1732705	HCFC1	3054	1.29415	0.372	0.002036		ILMN_1651776	FHOD1	29109	0.790589	-0.339	0.002899	1.26488
	ILMN_1680386	RPP38	10557	1.29415	0.372	0.003142		ILMN_1733366	MAST1	22983	0.790589	-0.339	0.032527	1.26488
	ILMN_1793770	DNAJB6	10049	1.29325	0.371	0.001885		ILMN_1683678	SPATS2L	26010	0.790589	-0.339	0.037646	1.26488
	ILMN_1682197	NFXL1	152518	1.29325	0.371	0.005607		ILMN_1784661	TMEM2	NA	0.790589	-0.339	0.038631	1.26488
	ILMN_2100000	DHX36	170506	1.29325	0.371	0.007621		ILMN_1720829	ZFP36	7538	0.791137	-0.338	0.001807	1.264
	ILMN_1654488	UTX	NA	1.29325	0.371	0.011944		ILMN_1740555	SNAP25	6616	0.791686	-0.337	0.010156	1.26313
	ILMN_1716583	NME7	29922	1.29325	0.371	0.014966		ILMN_1672720	PRSS12	8492	0.792235	-0.336	0.001621	1.26225
	ILMN_1803953	LOC388789	NA	1.29325	0.371	0.022007		ILMN_1666178	TP53I13	90313	0.792235	-0.336	0.00213	1.26225
	ILMN_1810729	UBL3	5412	1.29325	0.371	0.023696		ILMN_1755822	SYDE1	85360	0.792235	-0.336	0.005644	1.26225
	ILMN_3217172	LOC286444	NA	1.29235	0.37	0.002525		ILMN_3243381	MLEC	9761	0.792235	-0.336	0.016855	1.26225
	ILMN_1703226	KTI12	112970	1.29235	0.37	0.00398		ILMN_1754600	FNBP1L	54874	0.792235	-0.336	0.017768	1.26225
	ILMN_1852793	HS.143408	NA	1.29235	0.37	0.00799		ILMN_2169439	ITGAV	3685	0.792235	-0.336	0.036658	1.26225
	ILMN_2161357	C6ORF111	NA	1.29235	0.37	0.018976		ILMN_1692742	DENND3	22898	0.792235	-0.336	0.047243	1.26225
	ILMN_1748908	PROSC	NA	1.29146	0.369	0.001395		ILMN_1680501	GTF2IRD2B	389524	0.792784	-0.335	0.004153	1.26138
	ILMN_1730118	ZNF644	84146	1.29146	0.369	0.002529		ILMN_1763891	FLJ35258	NA	0.792784	-0.335	0.006635	1.26138
	ILMN_1806601	GRSF1	2926	1.29146	0.369	0.003329		ILMN_2388539	C17ORF101	NA	0.792784	-0.335	0.011103	1.26138
	ILMN_2258363	KLC4	89953	1.29146	0.369	0.02723		ILMN_1683277	KIAA0319L	79932	0.792784	-0.335	0.018608	1.26138
	ILMN_1782045	FKBP4	2288	1.29146	0.369	0.028132		ILMN_1724396	GCG	2641	0.792784	-0.335	0.02249	1.26138
	ILMN_3299558	SFRS18	NA	1.29146	0.369	0.029045		ILMN_2235602	CCDC150	284992	0.792784	-0.335	0.03245	1.26138
	ILMN_1778255	FARSA	2193	1.29056	0.368	0.001724		ILMN_1800225	PPARG	5468	0.793334	-0.334	0.003165	1.2605
	ILMN_1776000	EID3	493861	1.29056	0.368	0.001797		ILMN_1685690	JARID1D	NA	0.793334	-0.334	0.012299	1.2605
	ILMN_1757336	LRCH3	84859	1.29056	0.368	0.002335		ILMN_2363065	RTN3	10313	0.793334	-0.334	0.012299	1.2605
	ILMN_2403247	CMTM7	112616	1.29056	0.368	0.010845		ILMN_1757387	UCHL1	7345	0.793334	-0.334	0.016703	1.2605
	ILMN_1773850	FXC1	NA	1.29056	0.368	0.014958		ILMN_1708328	RAB11FIP3	9727	0.793334	-0.334	0.018539	1.2605
	ILMN_1786215	ZNF3	7551	1.28967	0.367	0.001895		ILMN_1740169	TYRO3	7301	0.793334	-0.334	0.028841	1.2605
	ILMN_1657754	RPAP2	79871	1.28967	0.367	0.002772		ILMN_1733511	GOLGA3	2802	0.793884	-0.333	0.003124	1.25963
	ILMN_3245236	FBRS	64319	1.28967	0.367	0.003821		ILMN_1720710	HSPB3	8988	0.793884	-0.333	0.005907	1.25963
	ILMN_1688698	ZEB2	9839	1.28967	0.367	0.005061		ILMN_1737089	CAPN5	726	0.793884	-0.333	0.006051	1.25963
	ILMN_1759460	TAF7	6879	1.28967	0.367	0.006098		ILMN_1668605	NAAA	27163	0.793884	-0.333	0.010699	1.25963
	ILMN_2088172	POLR2B	5431	1.28967	0.367	0.009143		ILMN_2413064	ST6GALNAC4	27090	0.793884	-0.333	0.01154	1.25963
	ILMN_2394193	C14ORF138	NA	1.28967	0.367	0.010095		ILMN_1759628	ATP1B3	483	0.793884	-0.333	0.012299	1.25963
	ILMN_1766793	C9ORF23	NA	1.28967	0.367	0.012376		ILMN_1809695	CAMK2G	818	0.793884	-0.333	0.015171	1.25963
	ILMN_1710923	SLAMF7	57823	1.28967	0.367	0.012621		ILMN_2222234	PRDX4	10549	0.794434	-0.332	0.004775	1.25876
	ILMN_1805466	SOX9	6662	1.28967	0.367	0.013422		ILMN_2227266	TMEM35	NA	0.794434	-0.332	0.011389	1.25876
	ILMN_1705469	RDH14	57665	1.28877	0.366	0.000427		ILMN_3241870	FRMD8	83786	0.794434	-0.332	0.017857	1.25876
	ILMN_1786108	TUT1	64852	1.28877	0.366	0.000743		ILMN_1659905	FKBP10	60681	0.794985	-0.331	0.023842	1.25788
	ILMN_2110281	UFC1	51506	1.28877	0.366	0.000785		ILMN_1654016	MRLC2	NA	0.794985	-0.331	0.025568	1.25788
	ILMN_1770742	TMEM55B	NA	1.28877	0.366	0.004065		ILMN_2386444	ANGPTL4	51129	0.795536	-0.33	0.039954	1.25701
	ILMN_1784037	ZBTB40	9923	1.28877	0.366	0.004109		ILMN_1763670	TM2D1	83941	0.796088	-0.329	0.007656	1.25614
	ILMN_1743829	ATXN2	6311	1.28877	0.366	0.009685		ILMN_2047599	TMEM50B	757	0.796088	-0.329	0.008217	1.25614
	ILMN_1787511	THUMPD2	80745	1.28788	0.365	0.001186		ILMN_1703335	LACTB	114294	0.796088	-0.329	0.016863	1.25614
	ILMN_2124769	YBX1	4904	1.28788	0.365	0.001801		ILMN_1713496	ST3GAL5	8869	0.796088	-0.329	0.042872	1.25614
	ILMN_2115633	CD320	51293	1.28788	0.365	0.006867		ILMN_2104106	XPR1	9213	0.79664	-0.328	0.002349	1.25527
	ILMN_1737685	CRLS1	54675	1.28788	0.365	0.038146		ILMN_2215640	TUBA3D	113457	0.79664	-0.328	0.023846	1.25527
	ILMN_2112402	PHF5A	84844	1.28699	0.364	0.001243		ILMN_2194467	SGCB	6443	0.79664	-0.328	0.024662	1.25527
	ILMN_1655163	STK24	8428	1.28699	0.364	0.001355		ILMN_1778347	NUDT2	318	0.797192	-0.327	0.00495	1.2544
	ILMN_2277523	DIP2A	23181	1.28699	0.364	0.020916		ILMN_1766797	CCS	9973	0.797192	-0.327	0.017923	1.2544
	ILMN_1665510	ERRFI1	54206	1.28699	0.364	0.048323		ILMN_1809267	CLCC1	23155	0.797192	-0.327	0.024191	1.2544
	ILMN_1806867	PPM1G	5496	1.2861	0.363	0.000526		ILMN_1740903	C7ORF49	NA	0.797192	-0.327	0.031031	1.2544
	ILMN_2041327	MRPL37	51253	1.2861	0.363	0.007621		ILMN_1763837	ANPEP	290	0.797192	-0.327	0.04499	1.2544
	ILMN_1811433	RPL8	6132	1.2861	0.363	0.025166		ILMN_1813528	CCBE1	147372	0.797745	-0.326	0.005967	1.25353
	ILMN_1691188	UIMC1	51720	1.28521	0.362	0.000271		ILMN_1684205	CIB1	10519	0.797745	-0.326	0.006725	1.25353
	ILMN_2205245	GPN2	54707	1.28521	0.362	0.000968		ILMN_1730879	CBY1	25776	0.797745	-0.326	0.014608	1.25353
	ILMN_1720850	BAZ2B	29994	1.28521	0.362	0.004337		ILMN_1672547	MYO9B	4650	0.797745	-0.326	0.025832	1.25353
	ILMN_1763452	EVI2B	2124	1.28521	0.362	0.008683		ILMN_3251506	ZNF69	7620	0.798298	-0.325	0.007621	1.25266
	ILMN_1811866	LOC642393	NA	1.28521	0.362	0.014006		ILMN_1730791	LOC646783	NA	0.798298	-0.325	0.023179	1.25266
	ILMN_1682694	LOC203547	NA	1.28521	0.362	0.015295		ILMN_1774949	PIGP	51227	0.798852	-0.324	0.009663	1.2518
	ILMN_1799299	PRPF38B	55119	1.28521	0.362	0.0204		ILMN_2373779	COPS8	10920	0.798852	-0.324	0.011086	1.2518
	ILMN_1792671	C12ORF29	NA	1.28521	0.362	0.020754		ILMN_2127477	G6PC3	92579	0.798852	-0.324	0.012222	1.2518
	ILMN_2323385	TRIM4	89122	1.28521	0.362	0.024507		ILMN_1745034	SLC11A2	4891	0.798852	-0.324	0.020696	1.2518
	ILMN_1762747	RPL15	6138	1.28521	0.362	0.045593		ILMN_1714349	GLCE	26035	0.798852	-0.324	0.043655	1.2518
	ILMN_1688534	EIF2B5	8893	1.28432	0.361	0.00149		ILMN_1800590	BBS1	582	0.799406	-0.323	0.011599	1.25093
	ILMN_1795454	CPSF6	11052	1.28432	0.361	0.002009		ILMN_2352190	CLIP2	7461	0.799406	-0.323	0.029626	1.25093
	ILMN_1668179	HNRNPF	3185	1.28432	0.361	0.003423		ILMN_1794863	CAMK2N1	55450	0.799406	-0.323	0.045574	1.25093
	ILMN_1657058	PPIL6	285755	1.28432	0.361	0.011764		ILMN_1678957	WDR55	54853	0.79996	-0.322	0.003015	1.25006
	ILMN_1660868	ZBTB8OS	339487	1.28343	0.36	0.001083		ILMN_1652379	SUCLG2	8801	0.79996	-0.322	0.005069	1.25006
	ILMN_2087575	ZC3H4	23211	1.28343	0.36	0.001089		ILMN_1727740	SYNCRIP	10492	0.79996	-0.322	0.006274	1.25006
	ILMN_2043109	TOP1P2	7152	1.28343	0.36	0.003042		ILMN_1804415	SMAGP	57228	0.79996	-0.322	0.009814	1.25006
	ILMN_1678671	KLHL24	54800	1.28343	0.36	0.003043		ILMN_1673604	YIPF3	25844	0.79996	-0.322	0.044052	1.25006
	ILMN_1806804	USP14	9097	1.28343	0.36	0.00424		ILMN_1744949	RHOBTB3	22836	0.79996	-0.322	0.044645	1.25006
	ILMN_1694075	GADD45A	1647	1.28343	0.36	0.006151
	ILMN_1836218	HS.481464	NA	1.28343	0.36	0.007962
	ILMN_1758049	NFIA	4774	1.28343	0.36	0.009503
	ILMN_1687947	HIST1H2BE	NA	1.28343	0.36	0.015328
	ILMN_1683447	LOC440737	NA	1.28343	0.36	0.026152
	ILMN_1750130	GSPT1	2935	1.28254	0.359	0.001247
	ILMN_1723141	OTUD1	220213	1.28254	0.359	0.001489
	ILMN_1734826	NUP88	4927	1.28254	0.359	0.003585
	ILMN_1655340	RNF181	51255	1.28254	0.359	0.005787
	ILMN_2157709	C14ORF19	NA	1.28254	0.359	0.00798
	ILMN_1759910	SERPINA5	5104	1.28254	0.359	0.009814
	ILMN_2410516	PPM1A	5494	1.28254	0.359	0.013176
	ILMN_2185884	DHRS4	10901	1.28254	0.359	0.030582
	ILMN_1695998	YKT6	10652	1.28254	0.359	0.036815
	ILMN_1764207	RPRD1A	55197	1.28254	0.359	0.042644
	ILMN_1659874	SFRS15	NA	1.28165	0.358	0.002724
	ILMN_1757956	PCGF1	84759	1.28165	0.358	0.005808
	ILMN_1668498	CWF19L2	143884	1.28165	0.358	0.008044
	ILMN_2192693	EIF3M	10480	1.28165	0.358	0.008831
	ILMN_1752631	CGGBP1	8545	1.28165	0.358	0.025476
	ILMN_1663664	MRPS10	55173	1.28165	0.358	0.025575
	ILMN_1782050	CEBPD	1052	1.28165	0.358	0.03866
	ILMN_1704305	NIP7	51388	1.28076	0.357	0.006274
	ILMN_3268914	LOC100128410	NA	1.28076	0.357	0.009427
	ILMN_2083588	TTC32	130502	1.28076	0.357	0.016836
	ILMN_1756220	DDX18	8886	1.28076	0.357	0.030825
	ILMN_1695598	LOC441775	NA	1.27987	0.356	0.003689
	ILMN_2318733	BNIP1	662	1.27987	0.356	0.004133
	ILMN_1812297	CYP26B1	56603	1.27987	0.356	0.006327
	ILMN_1751431	WIBG	NA	1.27987	0.356	0.006727
	ILMN_1756898	COQ9	57017	1.27987	0.356	0.0082
	ILMN_2306077	USP33	23032	1.27987	0.356	0.008456
	ILMN_1801378	COQ3	51805	1.27987	0.356	0.008542
	ILMN_1739943	SBNO1	55206	1.27987	0.356	0.008808
	ILMN_3248551	C2CD4B	388125	1.27987	0.356	0.011292
	ILMN_1814573	FTSJD1	NA	1.27987	0.356	0.012449
	ILMN_1735151	EIF5A2	56648	1.27987	0.356	0.012892
	ILMN_3237209	LOC642661	642661	1.27987	0.356	0.013533
	ILMN_1741253	UBR5	51366	1.27987	0.356	0.014222
	ILMN_3235539	LOC729859	729859	1.27987	0.356	0.015213
	ILMN_1707810	RPS5	6193	1.27987	0.356	0.017959
	ILMN_1662618	SQSTM1	8878	1.27987	0.356	0.035772
	ILMN_1809566	ZSCAN16	80345	1.27987	0.356	0.039799
	ILMN_1692163	NSDHL	50814	1.27899	0.355	0.002009
	ILMN_1651936	SETD8	NA	1.27899	0.355	0.003085
	ILMN_1724052	LOC730051	NA	1.27899	0.355	0.004128
	ILMN_1718619	TRIM11	81559	1.27899	0.355	0.004264
	ILMN_1749583	KIAA1285	NA	1.27899	0.355	0.009102
	ILMN_1825067	HS.540805	NA	1.27899	0.355	0.015666
	ILMN_2086105	SPRY4	81848	1.27899	0.355	0.03031
	ILMN_1779852	LOC387934	NA	1.27899	0.355	0.030541
	ILMN_3244592	SNORA68	26780	1.27899	0.355	0.031948
	ILMN_1658807	HMOX2	3163	1.27899	0.355	0.038319
	ILMN_2351611	UBQLN1	29979	1.2781	0.354	0.000732
	ILMN_3227023	SNHG7	84973	1.2781	0.354	0.007308
	ILMN_1657873	XPO4	64328	1.2781	0.354	0.010569
	ILMN_1682180	VCPIP1	80124	1.2781	0.354	0.030961
	ILMN_1667577	LCMT2	9836	1.27721	0.353	0.001076
	ILMN_1698402	NFX1	4799	1.27721	0.353	0.005264
	ILMN_1701724	C7ORF20	NA	1.27721	0.353	0.015583
	ILMN_1703565	GLTSCR2	NA	1.27721	0.353	0.022853
	ILMN_3241904	LOC100134000	NA	1.27721	0.353	0.026203
	ILMN_1677962	GPHN	10243	1.27633	0.352	0.002676
	ILMN_1786016	CHD1L	9557	1.27633	0.352	0.004364
	ILMN_1691376	JAG1	182	1.27633	0.352	0.0047
	ILMN_1808219	HEATR3	55027	1.27633	0.352	0.016585
	ILMN_1739454	USP34	9736	1.27633	0.352	0.026756
	ILMN_1656373	BNC2	54796	1.27544	0.351	0.002136
	ILMN_1710885	LOC387867	NA	1.27544	0.351	0.003012
	ILMN_1712755	LRRC41	10489	1.27544	0.351	0.014621
	ILMN_1663220	MRPL22	29093	1.27544	0.351	0.01579
	ILMN_1677385	C8ORF40	NA	1.27544	0.351	0.034519
	ILMN_1669516	ZNF193	NA	1.27456	0.35	0.002255
	ILMN_2378708	TAF6	6878	1.27456	0.35	0.0037
	ILMN_1658110	C18ORF19	NA	1.27456	0.35	0.004145
	ILMN_1680341	PPIE	10450	1.27456	0.35	0.008865
	ILMN_1739283	UPF2	26019	1.27456	0.35	0.012179
	ILMN_1750008	SUPV3L1	6832	1.27368	0.349	0.002083
	ILMN_1765060	FBXO34	55030	1.27368	0.349	0.00656
	ILMN_3240446	ZNF286C	NA	1.27368	0.349	0.008601
	ILMN_1773117	BCOR	54880	1.27368	0.349	0.00965
	ILMN_1678004	TMEM41B	440026	1.27368	0.349	0.012433
	ILMN_1653618	ZZZ3	26009	1.27368	0.349	0.02009
	ILMN_2181968	CBL	867	1.27368	0.349	0.026634
	ILMN_1680139	MAFF	23764	1.27368	0.349	0.031239
	ILMN_1654493	LOC649169	NA	1.27368	0.349	0.040101
	ILMN_2413572	MARK2	2011	1.27368	0.349	0.041785
	ILMN_1680860	LEMD2	221496	1.27279	0.348	0.000436
	ILMN_1811050	CCDC88A	55704	1.27279	0.348	0.002088
	ILMN_1652521	MTMR9	66036	1.27279	0.348	0.002956
	ILMN_1679655	WDR82	80335	1.27279	0.348	0.005511
	ILMN_1796497	PIP3-E	NA	1.27279	0.348	0.010679
	ILMN_1663447	HNRNPA1	3178	1.27279	0.348	0.01563
	ILMN_2042595	PCM1	5108	1.27279	0.348	0.020413
	ILMN_1756669	POGK	57645	1.27191	0.347	0.001416
	ILMN_2408102	TFIP11	24144	1.27191	0.347	0.001695
	ILMN_1760741	NDUFA9	4704	1.27191	0.347	0.002349
	ILMN_2079004	MDH2	4191	1.27191	0.347	0.003558
	ILMN_3251733	C19ORF43	NA	1.27191	0.347	0.012381
	ILMN_1761450	DHRS4L2	317749	1.27191	0.347	0.033499
	ILMN_1783702	MORC3	23515	1.27191	0.347	0.034006
	ILMN_1715886	CNOT7	29883	1.27103	0.346	0.001728
	ILMN_1664614	FAU	2197	1.27103	0.346	0.004755
	ILMN_1753790	ZNF259	NA	1.27103	0.346	0.006753
	ILMN_1751362	FASTKD1	79675	1.27103	0.346	0.007619
	ILMN_1689800	MRTO4	51154	1.27103	0.346	0.012299
	ILMN_1789349	UBQLN4	56893	1.27103	0.346	0.012331
	ILMN_3236346	LOC100132901	NA	1.27103	0.346	0.014659
	ILMN_1907620	HS.582764	NA	1.27103	0.346	0.015356
	ILMN_2411897	KLF10	7071	1.27103	0.346	0.020585
	ILMN_1714896	SART3	9733	1.27103	0.346	0.022515
	ILMN_2357272	BCLAF1	9774	1.27103	0.346	0.025463
	ILMN_2237746	ING3	54556	1.27103	0.346	0.027071
	ILMN_1743402	SIX4	51804	1.27103	0.346	0.029811
	ILMN_1768097	RPGR	6103	1.27015	0.345	0.005733
	ILMN_1721713	EXOSC9	5393	1.27015	0.345	0.006364
	ILMN_1675048	IGF1R	3480	1.27015	0.345	0.008091
	ILMN_2152429	C12ORF76	NA	1.27015	0.345	0.013673
	ILMN_3234775	SLAIN2	57606	1.27015	0.345	0.019113
	ILMN_1791925	NFAM1	150372	1.27015	0.345	0.028708
	ILMN_1750079	PURB	5814	1.27015	0.345	0.031967
	ILMN_1733390	LARP1B	55132	1.26927	0.344	0.000527
	ILMN_1769473	SETD2	29072	1.26927	0.344	0.002029
	ILMN_1687941	RNF4	6047	1.26927	0.344	0.005131
	ILMN_2352293	PRDM10	56980	1.26927	0.344	0.007188
	ILMN_1776522	RAG1AP1	NA	1.26927	0.344	0.0082
	ILMN_2207562	C4ORF16	NA	1.26927	0.344	0.008217
	ILMN_1780598	PIAS1	8554	1.26839	0.343	0.001774
	ILMN_1771734	LOC728564	NA	1.26839	0.343	0.005957
	ILMN_1685109	POLR3D	661	1.26839	0.343	0.007867
	ILMN_1663532	RIC8B	55188	1.26839	0.343	0.010761
	ILMN_1763328	GZF1	64412	1.26839	0.343	0.012073
	ILMN_2094587	USP8	9101	1.26839	0.343	0.012299
	ILMN_1808712	RNF40	9810	1.26839	0.343	0.021296
	ILMN_1808768	ROCK1	6093	1.26839	0.343	0.039921
	ILMN_1785198	POLE3	54107	1.26751	0.342	0.003085
	ILMN_2281186	RGNEF	NA	1.26751	0.342	0.003593
	ILMN_1713605	RPAP1	26015	1.26751	0.342	0.005316
	ILMN_1761411	C10ORF119	NA	1.26751	0.342	0.0105
	ILMN_1655557	INTS6	26512	1.26663	0.341	0.003801
	ILMN_2320850	UBE2D3	7323	1.26663	0.341	0.003851
	ILMN_1796235	CIRH1A	NA	1.26663	0.341	0.00397
	ILMN_1794949	DSCR1L1	NA	1.26663	0.341	0.00976
	ILMN_2080611	PDSS1	23590	1.26663	0.341	0.013547
	ILMN_1794967	EIF4ENIF1	56478	1.26663	0.341	0.016022
	ILMN_1693559	DOT1L	84444	1.26663	0.341	0.021697
	ILMN_1874901	HS.438979	NA	1.26663	0.341	0.031685
	ILMN_1727300	ZNF444	55311	1.26576	0.34	0.005647
	ILMN_1800197	MRPL36	64979	1.26576	0.34	0.009653
	ILMN_1725971	TMEM81	388730	1.26576	0.34	0.010655
	ILMN_2380418	BICD2	23299	1.26576	0.34	0.01223
	ILMN_1715832	PIK3R4	30849	1.26576	0.34	0.01226
	ILMN_1692705	RECQL	5965	1.26576	0.34	0.013782
	ILMN_1717165	IGBP1	3476	1.26576	0.34	0.045936
	ILMN_3235326	LOC388796	NA	1.26488	0.339	0.003518
	ILMN_1778032	SURF6	6838	1.26488	0.339	0.004664
	ILMN_3310514	MIR639	693224	1.26488	0.339	0.005187
	ILMN_1676503	LOC643446	NA	1.26488	0.339	0.011758
	ILMN_1751368	HNRNPD	3184	1.26488	0.339	0.017795
	ILMN_1775304	DNAJB1	3337	1.26488	0.339	0.033176
	ILMN_1706265	TRIM61	391712	1.26488	0.339	0.038953
	ILMN_1668683	MLL	NA	1.264	0.338	0.002198
	ILMN_3251620	JMY	133746	1.264	0.338	0.006936
	ILMN_1756542	TBC1D17	79735	1.264	0.338	0.007904
	ILMN_1713006	CDC34	997	1.264	0.338	0.008251
	ILMN_1687410	OSBPL11	114885	1.264	0.338	0.008584
	ILMN_1803005	MMACHC	25974	1.264	0.338	0.021846
	ILMN_1679731	SLC15A4	121260	1.264	0.338	0.023119
	ILMN_1736077	LIAS	11019	1.26313	0.337	0.003501
	ILMN_1794333	POU2F1	5451	1.26313	0.337	0.004182
	ILMN_1786015	CTCF	10664	1.26313	0.337	0.006916
	ILMN_1722292	AVL9	23080	1.26313	0.337	0.033459
	ILMN_3178043	BEND7	222389	1.26225	0.336	0.004111
	ILMN_1734198	RNGTT	8732	1.26225	0.336	0.004755
	ILMN_1706149	PDCD2L	84306	1.26225	0.336	0.005025
	ILMN_1655622	PRKRIR	NA	1.26225	0.336	0.005868
	ILMN_1718629	NRIP1	8204	1.26225	0.336	0.014274
	ILMN_1689972	RRP9	9136	1.26225	0.336	0.014862
	ILMN_1798163	UPF3B	65109	1.26225	0.336	0.015788
	ILMN_1692026	SUV420H1	NA	1.26225	0.336	0.024014
	ILMN_3310326	MIR221	407006	1.26225	0.336	0.02588
	ILMN_1680925	SLC9A3R1	9368	1.26225	0.336	0.026432
	ILMN_2408179	BAT2	NA	1.26225	0.336	0.035354
	ILMN_1765858	CAB39	51719	1.26138	0.335	0.003533
	ILMN_1763162	DPH2	1802	1.26138	0.335	0.009536
	ILMN_2400250	FAM86A	NA	1.26138	0.335	0.011959
	ILMN_2043728	ZNF341	84905	1.26138	0.335	0.014225
	ILMN_1758173	TMEM99	147184	1.26138	0.335	0.02026
	ILMN_3245824	C17ORF89	NA	1.26138	0.335	0.026486
	ILMN_1673991	ATIC	471	1.2605	0.334	0.007008
	ILMN_1804834	C6ORF130	NA	1.2605	0.334	0.020413
	ILMN_2295844	VAMP1	6843	1.2605	0.334	0.037736
	ILMN_1714741	LOC346887	NA	1.25963	0.333	0.002217
	ILMN_1681728	LOC643505	NA	1.25963	0.333	0.002981
	ILMN_1733115	RALGAPB	57148	1.25963	0.333	0.003797
	ILMN_1812976	DDX54	79039	1.25963	0.333	0.003803
	ILMN_1676625	SS18L1	26039	1.25963	0.333	0.005504
	ILMN_1853631	HS.551137	NA	1.25963	0.333	0.008165
	ILMN_1654118	BCL2L1	598	1.25963	0.333	0.009371
	ILMN_1656540	RUVBL1	8607	1.25963	0.333	0.010016
	ILMN_1806758	C9ORF85	NA	1.25963	0.333	0.01526
	ILMN_1672565	RG9MTD1	NA	1.25963	0.333	0.016961
	ILMN_1890734	HS.512285	NA	1.25963	0.333	0.019124
	ILMN_1735075	PGBD2	267002	1.25963	0.333	0.047683
	ILMN_1663667	FLAD1	80308	1.25876	0.332	0.001028
	ILMN_1705151	SF3A3	10946	1.25876	0.332	0.002142
	ILMN_1675460	LOC283412	NA	1.25876	0.332	0.00277
	ILMN_1676026	MRPS26	64949	1.25876	0.332	0.012617
	ILMN_2318811	RANBP3	8498	1.25876	0.332	0.016288
	ILMN_1784540	KBTBD2	25948	1.25876	0.332	0.024071
	ILMN_1739967	TBK1	29110	1.25876	0.332	0.032323
	ILMN_1697286	SF3A1	10291	1.25788	0.331	0.002299
	ILMN_1655377	MRPS22	56945	1.25788	0.331	0.002868
	ILMN_1657347	PODXL2	50512	1.25788	0.331	0.008299
	ILMN_1654685	MCTP1	79772	1.25788	0.331	0.010266
	ILMN_1793360	APITD1	NA	1.25788	0.331	0.011896
	ILMN_1721758	ID4	3400	1.25788	0.331	0.014592
	ILMN_1739222	ETV5	2119	1.25788	0.331	0.015944
	ILMN_1721225	C20ORF4	NA	1.25788	0.331	0.016474
	ILMN_1713143	MRPL3	11222	1.25788	0.331	0.029171
	ILMN_2329834	RBM12	10137	1.25701	0.33	0.003606
	ILMN_1656372	PES1	23481	1.25701	0.33	0.005426
	ILMN_1847822	KIAA0368	NA	1.25701	0.33	0.012532
	ILMN_1761010	PCCB	5096	1.25701	0.33	0.014134
	ILMN_1657317	POLR2J	5439	1.25701	0.33	0.019354
	ILMN_1700811	UBFD1	56061	1.25614	0.329	0.003232
	ILMN_1796119	ZUFSP	NA	1.25614	0.329	0.005344
	ILMN_2225548	ZNF521	25925	1.25614	0.329	0.006698
	ILMN_1757742	ZRANB1	54764	1.25614	0.329	0.007505
	ILMN_1706376	OSBP	5007	1.25614	0.329	0.011593
	ILMN_1729976	ZNF828	NA	1.25614	0.329	0.011599
	ILMN_1745962	FBXO7	25793	1.25614	0.329	0.014964
	ILMN_2397024	SPOP	8405	1.25527	0.328	0.002029
	ILMN_1708906	C2ORF29	NA	1.25527	0.328	0.002217
	ILMN_1791388	ZNF787	126208	1.25527	0.328	0.002649
	ILMN_1748283	PIM2	11040	1.25527	0.328	0.004755
	ILMN_1740418	CYP27B1	1594	1.25527	0.328	0.006992
	ILMN_2097421	MRPL51	51258	1.25527	0.328	0.010699
	ILMN_2340919	GRB10	2887	1.25527	0.328	0.011758
	ILMN_1784753	PAIP2	51247	1.25527	0.328	0.012157
	ILMN_1840316	HS.105791	NA	1.25527	0.328	0.016474
	ILMN_1683300	BAX	581	1.25527	0.328	0.025711
	ILMN_3246590	LOC100130525	NA	1.25527	0.328	0.039464
	ILMN_1768719	RDH11	51109	1.2544	0.327	0.000644
	ILMN_1734476	KIF2A	3796	1.2544	0.327	0.00495
	ILMN_1728626	WDR5	11091	1.2544	0.327	0.005342
	ILMN_1801553	LEO1	123169	1.2544	0.327	0.020119
	ILMN_1763663	FLJ20718	NA	1.2544	0.327	0.020728
	ILMN_1694798	C5ORF28	NA	1.2544	0.327	0.022693
	ILMN_3237850	C5ORF51	NA	1.2544	0.327	0.040934
	ILMN_1748797	GRB2	2885	1.25353	0.326	0.00897
	ILMN_1805371	HNRPM	NA	1.25353	0.326	0.011923
	ILMN_2174574	HNRNPA3P1	10151	1.25353	0.326	0.014402
	ILMN_1799208	CSGALNACT2	55454	1.25353	0.326	0.027251
	ILMN_1714599	CAMLG	819	1.25353	0.326	0.035061
	ILMN_1667670	SLC25A15	10166	1.25266	0.325	0.002007
	ILMN_1677610	OVCA2	124641	1.25266	0.325	0.009038
	ILMN_2227385	SLC16A14	151473	1.25266	0.325	0.014269
	ILMN_1667060	HSF1	3297	1.25266	0.325	0.014375
	ILMN_1806757	MYBBP1A	10514	1.25266	0.325	0.017168
	ILMN_1708728	H2AFJ	NA	1.25266	0.325	0.017589
	ILMN_3200378	LOC401127	401127	1.25266	0.325	0.019255
	ILMN_1729495	TRIM41	90933	1.25266	0.325	0.039124
	ILMN_1789176	PSMB1	5689	1.2518	0.324	0.004452
	ILMN_1720703	SLC25A3	5250	1.2518	0.324	0.006474
	ILMN_1758272	MYPN	84665	1.2518	0.324	0.007004
	ILMN_2358652	NXF1	10482	1.2518	0.324	0.01526
	ILMN_1733305	EIF2A	83939	1.2518	0.324	0.01999
	ILMN_1813938	CHCHD4	131474	1.2518	0.324	0.021501
	ILMN_1773407	C16ORF72	NA	1.2518	0.324	0.021776
	ILMN_1732810	SNX17	9784	1.2518	0.324	0.034893
	ILMN_3200830	LOC649553	NA	1.2518	0.324	0.048361
	ILMN_1787115	WWTR1	25937	1.25093	0.323	0.005717
	ILMN_3263423	LOC100129027	100129027	1.25093	0.323	0.011181
	ILMN_1659926	ST7L	54879	1.25093	0.323	0.012927
	ILMN_1673711	HSP90AB1	3326	1.25093	0.323	0.012937
	ILMN_1716651	RUNX2	860	1.25093	0.323	0.019737
	ILMN_1661346	LOC648210	NA	1.25093	0.323	0.021016
	ILMN_1741572	AKAP8	10270	1.25093	0.323	0.025151
	ILMN_3196690	C22ORF27	NA	1.25093	0.323	0.026029
	ILMN_3235477	RRP1	8568	1.25093	0.323	0.036112
	ILMN_1810832	ZNF343	79175	1.25093	0.323	0.036775
	ILMN_1655482	TRIM27	5987	1.25006	0.322	0.005416
	ILMN_3283141	LOC643802	643802	1.25006	0.322	0.005957
	ILMN_1751572	TLE1	7088	1.25006	0.322	0.009773
	ILMN_1714223	LETM2	137994	1.25006	0.322	0.009853
	ILMN_3200484	LOC126235	NA	1.25006	0.322	0.012996
	ILMN_1716822	KRTAP9-8	83901	1.25006	0.322	0.025054
	ILMN_1722583	COX4NB	NA	1.2492	0.321	0.012045
	ILMN_1700847	PMS1	5378	1.2492	0.321	0.012885
	ILMN_1757504	REG3A	5068	1.2492	0.321	0.013295
	ILMN_1789505	ITPR1	3708	1.2492	0.321	0.031685
	ILMN_2207393	CNOT3	4849	1.2492	0.321	0.03379
	ILMN_2126239	SMG5	23381	1.24833	0.32	0.001338
	ILMN_1651504	FAM193A	8603	1.24833	0.32	0.002412
	ILMN_3234089	N4BP2L2	10443	1.24833	0.32	0.004386
	ILMN_2082244	FOXK1	221937	1.24833	0.32	0.004908
	ILMN_3251445	MED27	9442	1.24833	0.32	0.006163
	ILMN_2227473	PIBF1	10464	1.24833	0.32	0.009503
	ILMN_1777096	TDG	6996	1.24833	0.32	0.009653
	ILMN_1659257	TNFRSF8	943	1.24833	0.32	0.017726
	ILMN_2176625	LOC285735	NA	1.24833	0.32	0.021702
	ILMN_1688346	ZNF800	168850	1.24833	0.32	0.029618
	ILMN_1747589	HIST2H2AB	NA	1.24833	0.32	0.030866
	ILMN_1770719	KIAA0664	NA	1.24833	0.32	0.042962
	ILMN_1660839	LOC644242	NA	1.24747	0.319	0.002454
	ILMN_1759325	C16ORF91	NA	1.24747	0.319	0.005566
	ILMN_3291063	LOC100131512	NA	1.24747	0.319	0.015071
	ILMN_1701331	UBE2M	9040	1.24747	0.319	0.024677
	ILMN_3302177	RPL14L	NA	1.24747	0.319	0.028399
	ILMN_2234412	TLE3	7090	1.24747	0.319	0.031685
	ILMN_1675770	SEC14L3	266629	1.2466	0.318	0.014536
	ILMN_1741180	HEXDC	NA	1.2466	0.318	0.020248
	ILMN_1688098	TBC1D4	9882	1.2466	0.318	0.020367
	ILMN_1671583	MKRN1	23608	1.2466	0.318	0.024293
	ILMN_1709894	CLPX	10845	1.2466	0.318	0.024495
	ILMN_1796962	PPP3R1	5534	1.2466	0.318	0.029811
	ILMN_1723414	HACL1	26061	1.2466	0.318	0.03706
	ILMN_2327203	POT1	25913	1.24574	0.317	0.004501
	ILMN_1659937	ZBTB24	9841	1.24574	0.317	0.007621
	ILMN_2090558	C2ORF25	NA	1.24574	0.317	0.011974
	ILMN_1763364	WHAMM	123720	1.24574	0.317	0.012189
	ILMN_1746276	EPC1	80314	1.24574	0.317	0.019414
	ILMN_1684746	IPO11	51194	1.24574	0.317	0.021293
	ILMN_1748481	TMEM199	147007	1.24574	0.317	0.021976
	ILMN_1682449	ZNF518B	85460	1.24487	0.316	0.005303
	ILMN_3244607	FAM117B	150864	1.24487	0.316	0.007089
	ILMN_1761083	HNRNPA3	220988	1.24487	0.316	0.008146
	ILMN_2108709	ANKRD11	29123	1.24487	0.316	0.009787
	ILMN_2323774	RPAIN	84268	1.24487	0.316	0.025439
	ILMN_3243700	RPS8	6202	1.24487	0.316	0.046934
	ILMN_1777691	ARL9	132946	1.24487	0.316	0.048735
	ILMN_3238608	LOC100134322	NA	1.24401	0.315	0.006418
	ILMN_1769545	PRPF19	27339	1.24401	0.315	0.006489
	ILMN_1666004	WASL	8976	1.24401	0.315	0.008524
	ILMN_1663486	TLK2	11011	1.24401	0.315	0.013673
	ILMN_1728660	PMPCB	9512	1.24401	0.315	0.013943
	ILMN_1743204	DUSP8	1850	1.24401	0.315	0.014324
	ILMN_1701855	PPP1CC	5501	1.24401	0.315	0.014373
	ILMN_2278636	CUTL1	NA	1.24401	0.315	0.018493
	ILMN_2167616	NACA	4666	1.24401	0.315	0.020089
	ILMN_1722945	C6ORF52	NA	1.24401	0.315	0.020911
	ILMN_1696468	LOC644544	NA	1.24401	0.315	0.02958
	ILMN_3240721	LOC645233	NA	1.24401	0.315	0.032513
	ILMN_1803941	TBC1D15	64786	1.24401	0.315	0.038516
	ILMN_3302905	LOC729798	NA	1.24315	0.314	0.005485
	ILMN_1910732	HS.539664	NA	1.24315	0.314	0.011127
	ILMN_1677158	IGFBPL1	347252	1.24315	0.314	0.01563
	ILMN_1748894	GTPBP3	84705	1.24315	0.314	0.024244
	ILMN_2375973	ALKBH1	8846	1.24315	0.314	0.028049
	ILMN_2403911	ARFIP1	27236	1.24315	0.314	0.031141
	ILMN_1751289	DERPC	113455421	1.24315	0.314	0.032513
	ILMN_1797031	HSPBAP1	79663	1.24229	0.313	0.007541
	ILMN_2130514	FAM76B	143684	1.24229	0.313	0.010727
	ILMN_2260392	ACTR3B	57180	1.24229	0.313	0.037119
	ILMN_1751171	IRF2BP1	26145	1.24229	0.313	0.037931
	ILMN_1790985	DJ341D10.1	NA	1.24229	0.313	0.045723
	ILMN_1688381	BPTF	2186	1.24143	0.312	0.004228
	ILMN_1784630	KBTBD11	9920	1.24143	0.312	0.012212
	ILMN_1775328	MTG1	92170	1.24143	0.312	0.0154
	ILMN_1798083	CHERP	10523	1.24143	0.312	0.015854
	ILMN_2082762	SNORD68	606500	1.24143	0.312	0.017064
	ILMN_1708382	C3ORF75	NA	1.24143	0.312	0.022124
	ILMN_1686929	GPATCH3	63906	1.24143	0.312	0.029177
	ILMN_2179837	BANF1	8815	1.24143	0.312	0.029893
	ILMN_1667453	HINFP	25988	1.24143	0.312	0.032023
	ILMN_1686679	ZNF462	58499	1.24143	0.312	0.041603
	ILMN_1662417	LRPPRC	10128	1.24057	0.311	0.010396
	ILMN_1707631	MED10	84246	1.24057	0.311	0.013047
	ILMN_1755926	DBI	1622	1.24057	0.311	0.023779
	ILMN_2391976	SLC45A4	57210	1.24057	0.311	0.023834
	ILMN_1802380	RERE	473	1.24057	0.311	0.024464
	ILMN_1775423	C10ORF88	NA	1.24057	0.311	0.030055
	ILMN_1781999	ABCF2	10061	1.24057	0.311	0.040641
	ILMN_1720771	STX11	8676	1.23971	0.31	0.006753
	ILMN_1683660	EIF3H	8667	1.23971	0.31	0.012694
	ILMN_1854833	HS.485155	NA	1.23971	0.31	0.013848
	ILMN_1659206	RARA	5914	1.23971	0.31	0.018968
	ILMN_3294965	LOC100133211	100133211	1.23971	0.31	0.024322
	ILMN_1870041	HS.482960	NA	1.23971	0.31	0.027062
	ILMN_2328094	DACT1	51339	1.23971	0.31	0.028999
	ILMN_1688178	RRP7A	27341	1.23885	0.309	0.002793
	ILMN_1711361	ZNF319	57567	1.23885	0.309	0.002871
	ILMN_2088410	PSMG2	56984	1.23885	0.309	0.002956
	ILMN_2193752	MBLAC2	153364	1.23885	0.309	0.01777
	ILMN_1789233	VPS37C	55048	1.23799	0.308	0.004352
	ILMN_1673773	GALNTL4	NA	1.23799	0.308	0.007671
	ILMN_1695271	RPP25	54913	1.23799	0.308	0.011948
	ILMN_2155998	PSMD6	9861	1.23799	0.308	0.014134
	ILMN_1712532	CARD9	64170	1.23799	0.308	0.019756
	ILMN_1797172	ERCC1	2067	1.23799	0.308	0.021065
	ILMN_2311497	SNHG3-RCC1	NA	1.23799	0.308	0.02473
	ILMN_1887987	HS.583755	NA	1.23799	0.308	0.027752
	ILMN_1722309	ENDOG	2021	1.23799	0.308	0.038411
	ILMN_1811692	FTSJ3	117246	1.23799	0.308	0.039464
	ILMN_2232430	NMD3	51068	1.23713	0.307	0.043367
	ILMN_1721729	PPARBP	NA	1.23628	0.306	0.000995
	ILMN_1679217	FAM110B	90362	1.23628	0.306	0.006641
	ILMN_1651949	SCYL3	57147	1.23628	0.306	0.006725
	ILMN_1681886	ADAMTS5	11096	1.23628	0.306	0.009998
	ILMN_1717326	SLC29A3	55315	1.23628	0.306	0.010211
	ILMN_1654671	SLMO1	NA	1.23628	0.306	0.018022
	ILMN_1730491	FMNL2	114793	1.23628	0.306	0.03513
	ILMN_1719694	LOC729446	NA	1.23542	0.305	0.008855
	ILMN_2078334	CNOT10	25904	1.23542	0.305	0.01129
	ILMN_1754234	ZMYND11	10771	1.23542	0.305	0.044987
	ILMN_1721116	USP10	9100	1.23456	0.304	0.008367
	ILMN_1657868	SIRT4	23409	1.23456	0.304	0.020159
	ILMN_1795835	LOC338758	NA	1.23456	0.304	0.021178
	ILMN_1739587	UTY	7404	1.23456	0.304	0.023134
	ILMN_2365383	ENO3	2027	1.23456	0.304	0.024138
	ILMN_1708064	MAP4	4134	1.23456	0.304	0.030468
	ILMN_3201937	LOC645381	NA	1.23456	0.304	0.037671
	ILMN_2253246	DNAJC28	54943	1.23456	0.304	0.048321
	ILMN_1796165	GLRX5	51218	1.23371	0.303	0.001968
	ILMN_1701711	BRD8	10902	1.23371	0.303	0.013063
	ILMN_1659976	CLP1	10978	1.23371	0.303	0.014384
	ILMN_3243185	RERGL	79785	1.23371	0.303	0.020911
	ILMN_1781231	SLC25A38	54977	1.23371	0.303	0.024565
	ILMN_1708881	RAB20	55647	1.23371	0.303	0.025166
	ILMN_1706413	C1ORF66	NA	1.23371	0.303	0.033331
	ILMN_1653797	C6ORF62	NA	1.23371	0.303	0.039986
	ILMN_1742730	TWIST2	117581	1.23371	0.303	0.041971
	ILMN_1692168	UBE2Z	65264	1.23285	0.302	0.002376
	ILMN_1684726	C2ORF27A	NA	1.23285	0.302	0.006867
	ILMN_1770667	HECA	51696	1.23285	0.302	0.007144
	ILMN_2310685	FOXK2	3607	1.23285	0.302	0.007671
	ILMN_1685547	ZXDB	158586	1.23285	0.302	0.008322
	ILMN_3251691	POLR3G	10622	1.23285	0.302	0.01222
	ILMN_2075065	FADS2	9415	1.23285	0.302	0.014134
	ILMN_1804789	KIAA1967	NA	1.23285	0.302	0.014477
	ILMN_1744649	PSMB5	5693	1.23285	0.302	0.016382
	ILMN_3307940	FLJ35776	NA	1.23285	0.302	0.016891
	ILMN_1804895	C7ORF53	NA	1.23285	0.302	0.017386
	ILMN_1652378	IPO7	10527	1.23285	0.302	0.018905
	ILMN_1736814	CLNS1A	1207	1.23285	0.302	0.021252
	ILMN_2176251	C20ORF72	NA	1.23285	0.302	0.026986
	ILMN_1701477	CCDC101	NA	1.23285	0.302	0.028325
	ILMN_1705907	NUP153	9972	1.23285	0.302	0.033665
	ILMN_2399431	PRPS2	5634	1.23285	0.302	0.035701
	ILMN_3247802	BAT2L	NA	1.23285	0.302	0.03593
	ILMN_1685415	HBP1	26959	1.23285	0.302	0.03718
	ILMN_1726410	APRT	353	1.23285	0.302	0.040994
	ILMN_1679995	MPP6	51678	1.23285	0.302	0.042154
	ILMN_2379734	CTBP1	1487	1.23285	0.302	0.046698
	ILMN_1782021	ZNF707	286075	1.232	0.301	0.006282
	ILMN_3200717	LOC643387	643387	1.232	0.301	0.008279
	ILMN_1689445	POLR2H	5437	1.232	0.301	0.00856
	ILMN_1763265	CHMP1B	57132	1.232	0.301	0.013965
	ILMN_1746784	SLAIN1	122060	1.232	0.301	0.016269
	ILMN_1664231	TIMM23	100287932	1.232	0.301	0.019949
	ILMN_1747725	MLC1	23209	1.232	0.301	0.037243
	ILMN_1755727	KDM5B	10765	1.232	0.301	0.040556
	ILMN_2055477	EXOSC7	23016	1.23114	0.3	0.010035
	ILMN_1807533	C17ORF71	NA	1.23114	0.3	0.012629
	ILMN_1743506	CCDC137	339230	1.23114	0.3	0.013701
	ILMN_1766528	SLC25A36	55186	1.23114	0.3	0.01973
	ILMN_1772651	CNOT2	4848	1.23114	0.3	0.021334
	ILMN_1667925	PDCL3	79031	1.23114	0.3	0.039119
	ILMN_3215212	LOC653375	NA	1.23114	0.3	0.039507
	ILMN_1666670	RBX1	9978	1.23114	0.3	0.041378
	ILMN_1670796	EXOSC10	5394	1.23029	0.299	0.009065
	ILMN_2046470	DAAM1	23002	1.23029	0.299	0.010845
	ILMN_1725981	LOC654189	NA	1.23029	0.299	0.015512
	ILMN_2357777	RNF214	257160	1.23029	0.299	0.016125
	ILMN_1790518	PHF16	NA	1.23029	0.299	0.018398
	ILMN_2375032	BEND3	57673	1.23029	0.299	0.022187
	ILMN_3225649	LOC731139	NA	1.23029	0.299	0.024024
	ILMN_1683475	TOMM40	10452	1.22944	0.298	0.004749
	ILMN_1652434	MTHFD2L	441024	1.22944	0.298	0.028056
	ILMN_1684074	NUP98	4928	1.22859	0.297	0.01426
	ILMN_1675007	ZSCAN5A	79149	1.22859	0.297	0.017684
	ILMN_1750974	S100A9	6280	1.22859	0.297	0.021564
	ILMN_1714623	TOMM22	56993	1.22859	0.297	0.022959
	ILMN_3236061	ZNF783	100289678	1.22859	0.297	0.027221
	ILMN_1781638	HDDC3	374659	1.22859	0.297	0.038768
	ILMN_1909610	HS.150734	NA	1.22859	0.297	0.046494
	ILMN_1757636	C5ORF35	NA	1.22859	0.297	0.047132
	ILMN_1745885	POLR2F	5435	1.22774	0.296	0.005069
	ILMN_1763460	NHP2L1	NA	1.22774	0.296	0.005096
	ILMN_2367258	SMOX	54498	1.22774	0.296	0.018501
	ILMN_1744574	TRUB1	142940	1.22774	0.296	0.02473
	ILMN_1705346	NBEA	26960	1.22774	0.296	0.026737
	ILMN_3268028	LOC100128805	NA	1.22774	0.296	0.039272
	ILMN_1652549	DTNA	1837	1.22774	0.296	0.042047
	ILMN_2332105	WRNIP1	56897	1.22689	0.295	0.01027
	ILMN_1745343	ZMAT2	153527	1.22689	0.295	0.011175
	ILMN_2402766	AFTPH	54812	1.22689	0.295	0.031802
	ILMN_1759232	IRS1	3667	1.22689	0.295	0.035427
	ILMN_1751147	SENP3	26168	1.22689	0.295	0.04699
	ILMN_1776552	FUBP1	8880	1.22689	0.295	0.047632
	ILMN_1680831	BAZ1B	9031	1.22603	0.294	0.008416
	ILMN_1677800	SGTA	6449	1.22603	0.294	0.037926
	ILMN_1738095	PER2	8864	1.22603	0.294	0.044103
	ILMN_1695868	PRICKLE4	29964	1.22603	0.294	0.047889
	ILMN_1658504	CHKA	1119	1.22519	0.293	0.007308
	ILMN_1812478	ZNHIT3	9326	1.22519	0.293	0.008783
	ILMN_1680109	COL4A3BP	NA	1.22519	0.293	0.017544
	ILMN_1651826	BASP1	10409	1.22434	0.292	0.013547
	ILMN_1732328	LOC646200	NA	1.22434	0.292	0.026103
	ILMN_1766128	THAP3	90326	1.22434	0.292	0.035833
	ILMN_1737025	PLCL2	23228	1.22434	0.292	0.037931
	ILMN_2396982	BCL2L12	83596	1.22434	0.292	0.039634
	ILMN_2103591	MORC2	22880	1.22434	0.292	0.049408
	ILMN_3295075	LOC100131531	NA	1.22349	0.291	0.006339
	ILMN_1689342	NUBP1	4682	1.22349	0.291	0.006753
	ILMN_1796968	INTS5	80789	1.22349	0.291	0.012222
	ILMN_2128668	FOXJ3	22887	1.22349	0.291	0.01389
	ILMN_3245310	CCDC94	NA	1.22349	0.291	0.020848
	ILMN_1693471	KLHL35	283212	1.22264	0.29	0.006047
	ILMN_1774272	ESRRA	2101	1.22264	0.29	0.010699
	ILMN_1797965	PDP2	57546	1.22264	0.29	0.013133
	ILMN_2200636	KIAA1267	NA	1.22264	0.29	0.016838
	ILMN_1673207	KLF11	8462	1.22264	0.29	0.03212
	ILMN_1787415	SNX16	64089	1.22264	0.29	0.043943
	ILMN_1658834	ZC3H18	124245	1.22179	0.289	0.012085
	ILMN_2327780	TRIM23	373	1.22179	0.289	0.013706
	ILMN_1661485	RBM34	23029	1.22179	0.289	0.017386
	ILMN_1787366	ZNF335	63925	1.22179	0.289	0.023323
	ILMN_2251225	WDR78	79819	1.22179	0.289	0.027582
	ILMN_3249608	ANKLE2	23141	1.22179	0.289	0.031679
	ILMN_1751984	PRKAG1	5571	1.22179	0.289	0.036136
	ILMN_1735360	SDAD1	55153	1.22095	0.288	0.013547
	ILMN_1814622	FLJ20125	NA	1.22095	0.288	0.020227
	ILMN_1798827	SRBD1	55133	1.22095	0.288	0.020815
	ILMN_1810235	ATP6V1E2	90423	1.22095	0.288	0.027574
	ILMN_3247201	LOC100133036	NA	1.22095	0.288	0.030677
	ILMN_1794392	DDX3X	1654	1.22095	0.288	0.036664
	ILMN_1700915	BMI1	648	1.22095	0.288	0.038134
	ILMN_1753353	SLBP	7884	1.22095	0.288	0.042924
	ILMN_2055165	MRFAP1	93621	1.2201	0.287	0.008913
	ILMN_1728887	PAK4	10298	1.2201	0.287	0.01003
	ILMN_2354237	PARP2	10038	1.2201	0.287	0.015985
	ILMN_1845086	HS.193784	NA	1.2201	0.287	0.033635
	ILMN_1706455	TTC5	91875	1.21926	0.286	0.002933
	ILMN_1716922	DHX16	8449	1.21926	0.286	0.004908
	ILMN_1727761	GMEB1	10691	1.21926	0.286	0.009681
	ILMN_1736234	C1ORF77	NA	1.21926	0.286	0.014269
	ILMN_3249902	LOC440386	NA	1.21926	0.286	0.023198
	ILMN_1763409	LRRC8D	55144	1.21926	0.286	0.025491
	ILMN_2171384	CXCL5	6374	1.21926	0.286	0.030554
	ILMN_2120340	RUVBL2	10856	1.21926	0.286	0.04346
	ILMN_1799168	LOC646938	646938	1.21926	0.286	0.046003
	ILMN_1714327	SETD1A	9739	1.21841	0.285	0.015291
	ILMN_1786843	KCTD13	253980	1.21841	0.285	0.026839
	ILMN_2166686	NUFIP1	26747	1.21841	0.285	0.029242
	ILMN_2086417	NDUFV2	4729	1.21841	0.285	0.033083
	ILMN_1673024	RBM15B	29890	1.21841	0.285	0.036016
	ILMN_1808500	CEP68	23177	1.21841	0.285	0.04446
	ILMN_1764239	PMPCA	23203	1.21841	0.285	0.049917
	ILMN_2398432	BRMS1	25855	1.21757	0.284	0.010738
	ILMN_1814173	SMARCA4	6597	1.21757	0.284	0.011792
	ILMN_1683082	RPUSD1	113000	1.21757	0.284	0.015147
	ILMN_1800795	LOC340260	NA	1.21757	0.284	0.022106
	ILMN_1793033	RBM28	55131	1.21757	0.284	0.02588
	ILMN_1776266	CRYGB	1419	1.21757	0.284	0.028981
	ILMN_1757408	ZNF256	10172	1.21757	0.284	0.033665
	ILMN_1743397	PIGW	284098	1.21757	0.284	0.036221
	ILMN_1799367	TXNDC14	NA	1.21757	0.284	0.037736
	ILMN_3250243	FAM119A	NA	1.21672	0.283	0.005957
	ILMN_2124951	RBMX	27316	1.21672	0.283	0.023295
	ILMN_1781234	CCDC22	28952	1.21672	0.283	0.023432
	ILMN_1741736	DDX28	55794	1.21672	0.283	0.023986
	ILMN_3182422	LOC100129828	NA	1.21672	0.283	0.035449
	ILMN_1815718	BTRC	8945	1.21672	0.283	0.042644
	ILMN_2369603	CPEB1	64506	1.21672	0.283	0.048829
	ILMN_1797534	RIOK1	83732	1.21588	0.282	0.009397
	ILMN_1789944	PGAM5	192111	1.21588	0.282	0.012972
	ILMN_1747412	DPP3	10072	1.21588	0.282	0.021735
	ILMN_1670096	NRBP1	29959	1.21588	0.282	0.030547
	ILMN_1771061	BRD4	23476	1.21588	0.282	0.046322
	ILMN_1814859	DDX47	51202	1.21504	0.281	0.012951
	ILMN_3296705	LOC283314	NA	1.21504	0.281	0.014677
	ILMN_1774074	RXRB	6257	1.21504	0.281	0.047389
	ILMN_1771326	C15ORF44	NA	1.21504	0.281	0.049302
	ILMN_1740305	DLEC1	9940	1.21419	0.28	0.012299
	ILMN_1669633	ACP1	52	1.21419	0.28	0.015144
	ILMN_1778240	GFOD1	54438	1.21419	0.28	0.018556
	ILMN_2199298	C19ORF20	NA	1.21419	0.28	0.031095
	ILMN_1668960	MID1IP1	58526	1.21419	0.28	0.033408
	ILMN_2096083	PLEKHA5	54477	1.21419	0.28	0.033529
	ILMN_1674152	NFKBIB	4793	1.21419	0.28	0.03545
	ILMN_3193796	LOC100129979	NA	1.21419	0.28	0.042644
	ILMN_1716766	CEBPG	1054	1.21419	0.28	0.049653
	ILMN_1758633	CCDC130	81576	1.21335	0.279	0.005405
	ILMN_1733703	TRMU	55687	1.21335	0.279	0.006463
	ILMN_1737972	TSPYL5	85453	1.21335	0.279	0.012383
	ILMN_1774661	SNRPB	6628	1.21335	0.279	0.016424
	ILMN_1685002	RCE1	9986	1.21335	0.279	0.020703
	ILMN_1806320	PPFIBP1	8496	1.21335	0.279	0.024019
	ILMN_1773066	CDKN2AIP	55602	1.21335	0.279	0.027936
	ILMN_1876924	WNK1	65125	1.21335	0.279	0.031727
	ILMN_3245066	DENND4B	9909	1.21335	0.279	0.034901
	ILMN_1784977	DOHH	83475	1.21335	0.279	0.046341
	ILMN_1757270	DBN1	1627	1.21335	0.279	0.048356
	ILMN_2307450	ZNF302	55900	1.21335	0.279	0.04928
	ILMN_1670901	COX10	1352	1.21251	0.278	0.009961
	ILMN_1677376	CHD7	55636	1.21251	0.278	0.011294
	ILMN_1810233	UGT2B11	10720	1.21251	0.278	0.022515
	ILMN_2212590	TMEM170A	124491	1.21251	0.278	0.023272
	ILMN_2322935	MAPKAPK5	8550	1.21167	0.277	0.016788
	ILMN_1666364	COQ10A	93058	1.21167	0.277	0.019414
	ILMN_1771135	ZKSCAN2	342357	1.21167	0.277	0.019761
	ILMN_1730631	C2ORF44	NA	1.21167	0.277	0.024787
	ILMN_2131936	ATAD3B	83858	1.21167	0.277	0.033057
	ILMN_2391551	C13ORF23	NA	1.21167	0.277	0.037969
	ILMN_1680434	MAPK8IP1	9479	1.21167	0.277	0.042047
	ILMN_3217149	LOC727895	NA	1.21083	0.276	0.012185
	ILMN_1726181	C19ORF52	NA	1.21083	0.276	0.020257
	ILMN_2054261	RFX6	222546	1.21083	0.276	0.042154
	ILMN_2378100	FBXL5	26234	1.20999	0.275	0.026159
	ILMN_2061310	ZNF280C	55609	1.20999	0.275	0.034077
	ILMN_1674128	CWC22	57703	1.20999	0.275	0.047664
	ILMN_3307648	CS	1431	1.20916	0.274	0.009792
	ILMN_1756811	C1ORF103	NA	1.20916	0.274	0.014697
	ILMN_1655644	ZNF804A	91752	1.20916	0.274	0.016314
	ILMN_1785570	SUSD3	203328	1.20916	0.274	0.031365
	ILMN_1772486	ELF2	1998	1.20916	0.274	0.038056
	ILMN_1689749	LOC645212	NA	1.20832	0.273	0.011129
	ILMN_3208140	LOC100134189	NA	1.20832	0.273	0.014061
	ILMN_3204346	LOC100131897	NA	1.20832	0.273	0.016536
	ILMN_2107184	SNRK	54861	1.20832	0.273	0.017768
	ILMN_3180557	CYB561D1	284613	1.20832	0.273	0.025166
	ILMN_1725166	POLN	353497	1.20832	0.273	0.039649
	ILMN_1674934	FOXF2	2295	1.20832	0.273	0.041542
	ILMN_1793672	SIX5	147912	1.20832	0.273	0.049482
	ILMN_1660832	LOC285053	NA	1.20748	0.272	0.013562
	ILMN_1696585	FERMT1	55612	1.20748	0.272	0.022809
	ILMN_1850795	HS.156568	NA	1.20748	0.272	0.031631
	ILMN_1684293	ANP32B	10541	1.20748	0.272	0.036172
	ILMN_1712657	FALZ	NA	1.20748	0.272	0.036767
	ILMN_2148507	ANKRD13C	81573	1.20748	0.272	0.04171
	ILMN_1740294	MAP1D	NA	1.20748	0.272	0.043796
	ILMN_1741585	SFMBT1	51460	1.20748	0.272	0.047065
	ILMN_2219134	RPS15	6209	1.20664	0.271	0.011815
	ILMN_1727923	ZNF140	7699	1.20664	0.271	0.017374
	ILMN_1729281	SPHK2	56848	1.20664	0.271	0.018931
	ILMN_1763007	HIAT1	NA	1.20664	0.271	0.026106
	ILMN_1701006	HEXIM2	124790	1.20664	0.271	0.033054
	ILMN_2332267	CSNK1G3	1456	1.20664	0.271	0.047172
	ILMN_1768293	NUP155	9631	1.20581	0.27	0.026253
	ILMN_1792497	HRB	NA	1.20581	0.27	0.031617
	ILMN_1748916	C18ORF55	NA	1.20581	0.27	0.031727
	ILMN_2048636	ME2	4200	1.20581	0.27	0.033331
	ILMN_1787808	CEP63	80254	1.20581	0.27	0.047632
	ILMN_3224290	LOC730052	NA	1.20581	0.27	0.049836
	ILMN_2316778	ETNK1	55500	1.20497	0.269	0.012663
	ILMN_2365881	ATG16L1	55054	1.20497	0.269	0.030874
	ILMN_3193560	LOC100128370	NA	1.20497	0.269	0.03691
	ILMN_2169856	C12ORF43	NA	1.20414	0.268	0.012381
	ILMN_1673175	TNFSF11	8600	1.20414	0.268	0.028101
	ILMN_2211003	GAS2L3	283431	1.20414	0.268	0.033139
	ILMN_2180866	RPS26P11	441502	1.20414	0.268	0.04357
	ILMN_2116661	PRPSAP2	5636	1.20414	0.268	0.043655
	ILMN_2327947	SLC25A25	114789	1.20414	0.268	0.045723
	ILMN_3307799	PSMD4	5710	1.2033	0.267	0.012806
	ILMN_3250077	EIF4E	1977	1.2033	0.267	0.028381
	ILMN_1680347	ZNF317	57693	1.2033	0.267	0.030414
	ILMN_2092693	LSM12	124801	1.2033	0.267	0.040418
	ILMN_1761961	CCDC90A	NA	1.2033	0.267	0.049482
	ILMN_3181489	LOC100130790	NA	1.20247	0.266	0.016788
	ILMN_2361603	NDRG2	57447	1.20247	0.266	0.026866
	ILMN_1675542	LOC729148	NA	1.20247	0.266	0.031338
	ILMN_1779177	U2AF1L4	199746	1.20247	0.266	0.033665
	ILMN_1671911	MTA1	9112	1.20247	0.266	0.040483
	ILMN_1799024	VAC14	55697	1.20247	0.266	0.042806
	ILMN_1777976	SLC25A26	115286	1.20247	0.266	0.043196
	ILMN_1695827	PPP1CA	5499	1.20247	0.266	0.046013
	ILMN_1737255	C22ORF36	NA	1.20247	0.266	0.046358
	ILMN_2057826	PHF3	23469	1.20164	0.265	0.01563
	ILMN_1794522	EIF5A	1984	1.20164	0.265	0.024138
	ILMN_1685012	EAF1	85403	1.20164	0.265	0.030057
	ILMN_1740216	ERCC3	2071	1.20164	0.265	0.039671
	ILMN_1713835	ENHO	375704	1.20164	0.265	0.046934
	ILMN_1761069	UVRAG	7405	1.20164	0.265	0.048783
	ILMN_1793632	TMEM222	84065	1.2008	0.264	0.014424
	ILMN_1682081	RNF19B	127544	1.2008	0.264	0.024889
	ILMN_2079803	LSM14A	26065	1.2008	0.264	0.040641

## Sheet: ST3.T47D
Table S3. Differentially expressed genes.
B. T47D cells
	Up-regulated genes								Down-regulated genes
	ProbeID	GenesID	EntrezID	Fold-Change	Log2(Fold-Change)	P-Value	Group		ProbeID	GenesID	EntrezID	Fold-Change	Log2(Fold-Change)	P-Value	Group
	ILMN_1701111	RP5-1022P6.2	NA	2.21345	1.1463	0.0265003	B		ILMN_2390853	CTSH	1512	0.833986	-0.261906	0.01623	B
	ILMN_1788192	ARMCX1	51309	2.0047	1.00339	0.0419616	B		ILMN_1700477	MRPL43	84545	0.826754	-0.274471	0.01623	B
	ILMN_1696806	CTNND1	1500	1.66729	0.737502	0.0419616	B		ILMN_2136423	MARS2	92935	0.821029	-0.284494	0.0419616	B
									ILMN_1680343	AGL	178	0.818216	-0.289446	0.0419616	B
	ILMN_3240594	RNU4ATAC	100151683	5.76669	2.52774	0.01623	C		ILMN_3306168	MOBKL3	NA	0.805344	-0.312324	0.0419616	B
	ILMN_1795835	LOC338758	NA	3.44069	1.7827	0.0340692	C		ILMN_1795836	C21ORF57	NA	0.802128	-0.318096	0.0419616	B
	ILMN_3242315	SNORD3D	780854	3.20028	1.6782	0.000412295	C		ILMN_1730355	FGFR4	2264	0.794771	-0.331388	0.0419616	B
	ILMN_1704056	RPPH1	85495	2.86086	1.51645	0.000792268	C		ILMN_2080637	ZBTB44	29068	0.770966	-0.37526	0.0419616	B
	ILMN_3236653	RNU1-5	NA	2.39706	1.26127	0.0047182	C		ILMN_2113362	ARL6IP1	23204	0.770477	-0.376175	0.0419616	B
	ILMN_3239574	SNORD3A	780851	2.07595	1.05377	0.000412295	C		ILMN_1794803	NDP	4693	0.767762	-0.381269	0.0419616	B
	ILMN_3244646	RNU1G2	NA	2.0445	1.03175	0.00108625	C		ILMN_3193903	LOC100128695	NA	0.752797	-0.409667	0.0419616	B
	ILMN_3246273	RNU1-3	26869	1.93979	0.955903	0.000573633	C		ILMN_2094905	COMMD10	51397	0.719468	-0.474998	0.0265003	B
	ILMN_3245678	RNU1A3	NA	1.82324	0.866505	0.00199769	C		ILMN_3260345	AGFG1	3267	0.640473	-0.64279	0.01623	B
	ILMN_3240220	RNU1F1	NA	1.79793	0.846338	0.00619332	C		ILMN_2139761	LIMCH1	22998	0.558755	-0.839712	0.0402387	B
	ILMN_3293972	LOC647086	647086	1.77788	0.830156	0.0237414	C
	ILMN_1708728	H2AFJ	NA	1.72857	0.789583	0.0328974	C		ILMN_2058782	IFI27	3429	0.155602	-2.68407	0.0347556	C
	ILMN_1707181	LOC644284	NA	1.71433	0.777642	0.0216841	C		ILMN_1760062	IFI44	10561	0.335039	-1.5776	0.0251815	C
	ILMN_1669523	FOS	2353	1.6765	0.745451	0.00335344	C		ILMN_3182451	LOC100129652	NA	0.353131	-1.50172	0.0199645	C
	ILMN_1772430	LOC652392	NA	1.615	0.691532	0.0472209	C		ILMN_1779780	CHTF8	54921	0.411305	-1.28172	0.00431036	C
	ILMN_1735930	KLF2	10365	1.59712	0.675469	0.0340692	C		ILMN_1814305	SAMD9	54809	0.441365	-1.17996	0.0215563	C
	ILMN_1651498	GADD45G	10912	1.54607	0.628605	0.0047182	C		ILMN_2363621	RBBP8	5932	0.458373	-1.12541	0.0373364	C
	ILMN_3201900	LOC728147	NA	1.52225	0.606201	0.0234106	C		ILMN_3211187	LOC100133479	NA	0.471292	-1.08531	0.03316	C
	ILMN_2218401	ZNF563	147837	1.4996	0.584582	0.03316	C		ILMN_2347917	EED	8726	0.494194	-1.01685	0.0303828	C
	ILMN_1652846	PCYT2	5833	1.48571	0.571156	0.0297581	C		ILMN_1728626	WDR5	11091	0.514504	-0.958746	0.0322773	C
	ILMN_2051469	E2F1	1869	1.47738	0.563036	0.0422601	C		ILMN_1779280	OTUD3	23252	0.525632	-0.927875	0.0238684	C
	ILMN_1762426	DHFRL1	NA	1.45097	0.537019	0.0347556	C		ILMN_2322972	ZFYVE27	118813	0.532592	-0.908898	0.0135873	C
	ILMN_1764709	MAFB	9935	1.43833	0.524398	0.0171182	C		ILMN_1787292	CDC20B	166979	0.54174	-0.884327	0.0297581	C
	ILMN_1770831	LOC641978	NA	1.4164	0.502228	0.0047182	C		ILMN_2218780	PPM2C	NA	0.548047	-0.867629	0.0409136	C
	ILMN_3235404	SNORA57	692158	1.37147	0.455721	0.00267971	C		ILMN_3211986	LOC149501	NA	0.55417	-0.851599	0.0368884	C
	ILMN_3249286	SNORD12C	26765	1.35626	0.439635	0.0216841	C		ILMN_2398865	VPS13C	54832	0.55738	-0.843267	0.0135873	C
	ILMN_3255144	LOC100129104	NA	1.34538	0.428013	0.0422601	C		ILMN_2115218	ANKRD10	55608	0.559311	-0.838277	0.0134187	C
	ILMN_1658847	MGC61598	NA	1.30565	0.384769	0.0272754	C		ILMN_3305751	LOC729858	NA	0.578249	-0.790238	0.018129	C
	ILMN_3248890	SNORA24	677809	1.30116	0.379801	0.0422601	C		ILMN_1797776	PRSS23	11098	0.578686	-0.789147	0.014214	C
	ILMN_3307818	C9ORF106	NA	1.29358	0.371365	0.0342578	C		ILMN_1778134	TBRG1	84897	0.578918	-0.78857	0.0106033	C
	ILMN_3301740	LOC729887	NA	1.2881	0.36524	0.00807149	C		ILMN_1662640	C20ORF127	NA	0.581118	-0.783096	0.00216379	C
	ILMN_1751607	FOSB	2354	1.28577	0.362629	0.0171182	C		ILMN_1721430	LOC387790	NA	0.587333	-0.767749	0.0328974	C
	ILMN_2086095	ID2	3398	1.27317	0.34843	0.000573633	C		ILMN_2262044	PARP10	84875	0.593978	-0.751518	0.0422601	C
	ILMN_3251120	LOC285407	NA	1.27027	0.345135	0.0272754	C		ILMN_1806703	LOC643037	NA	0.595063	-0.748885	0.00729036	C
	ILMN_3237452	C17orf100	388327	1.25511	0.32781	0.0272754	C		ILMN_2203768	PRR15	222171	0.597299	-0.743474	0.0453276	C
	ILMN_1670518	WDFY3	23001	1.25386	0.32638	0.0189035	C		ILMN_1763704	RGS11	8786	0.599597	-0.737936	0.0240277	C
	ILMN_1790114	LOC474170	NA	1.21315	0.278755	0.0176723	C		ILMN_2115534	GPR112	NA	0.599719	-0.737642	0.00538494	C
	ILMN_1744118	ASTN2	23245	1.19705	0.259489	0.0368884	C		ILMN_1708145	LOC440748	NA	0.601319	-0.733797	0.00800994	C
	ILMN_1685258	TMEM14B	81853	1.19295	0.254528	0.0171182	C		ILMN_1804808	LOC645143	NA	0.60443	-0.726353	0.0391702	C
									ILMN_3230608	NBPF8	728841	0.607865	-0.718178	0.0171182	C
	ILMN_1775587	STX19	415117	4.44526	2.15227	0.0419616	D		ILMN_1812557	CDK5RAP3	80279	0.607972	-0.717924	0.0215563	C
	ILMN_2085441	FOXD4L1	200350	2.90184	1.53697	0.0265003	D		ILMN_1709020	MYBL2	4605	0.609259	-0.714872	0.0124193	C
	ILMN_1681252	C17orf44	NA	2.3596	1.23854	0.0265003	D		ILMN_1658080	ZNF573	126231	0.612004	-0.708386	0.0183978	C
	ILMN_2184184	ANXA1	301	2.3161	1.2117	0.01623	D		ILMN_1773002	LOC730417	NA	0.616421	-0.698012	0.0337522	C
	ILMN_2373073	LIG4	3981	2.29492	1.19844	0.0402387	D		ILMN_1755383	LRRC1	55227	0.619355	-0.691161	0.0340692	C
	ILMN_2146566	SFRS16	NA	2.24853	1.16898	0.0419616	D		ILMN_1788059	PCGF5	84333	0.621276	-0.686694	0.0107734	C
	ILMN_2339284	CHD2	1106	1.92089	0.941774	0.0419616	D		ILMN_3252446	LOC100129543	NA	0.624484	-0.679263	0.0047182	C
	ILMN_1771155	TSPYL2	64061	1.89442	0.921759	0.0265003	D		ILMN_1653228	C3ORF22	NA	0.626526	-0.674553	0.0239487	C
	ILMN_1765668	IL20RB	53833	1.74972	0.807124	0.0189035	D		ILMN_1766974	ZNF107	51427	0.62916	-0.668501	0.03316	C
	ILMN_3240986	LOC100134584	NA	1.58399	0.663562	0.0419616	D		ILMN_1654398	RGL1	23179	0.630037	-0.666491	0.0118211	C
	ILMN_1678097	KIAA2010	NA	1.57745	0.657595	0.0189035	D		ILMN_2115490	NBPF20	100288142	0.630626	-0.665144	0.0422601	C
	ILMN_1764415	ZNF585A	199704	1.51178	0.596252	0.0281858	D		ILMN_1696601	VARS	NA	0.634697	-0.65586	0.0368884	C
	ILMN_1660079	RNF44	22838	1.49378	0.578964	0.0419616	D		ILMN_1774955	LOC440345	NA	0.635488	-0.654063	0.0047182	C
	ILMN_1788192	ARMCX1	51309	1.44954	0.535594	0.0265003	D		ILMN_2135527	DEPDC4	120863	0.63767	-0.649119	0.0130652	C
	ILMN_2262044	PARP10	84875	1.43602	0.522073	0.01623	D		ILMN_1667288	SNORD73A	8944	0.638416	-0.647431	0.0047182	C
	ILMN_3201900	LOC728147	NA	1.40378	0.489316	0.0419616	D		ILMN_1692834	C1ORF26	NA	0.643015	-0.637075	0.0128413	C
	ILMN_1808707	FSCN1	6624	1.37056	0.454765	0.0419616	D		ILMN_1655218	NFAT5	10725	0.644123	-0.634591	0.0216841	C
	ILMN_3291705	LOC645978	645978	1.31657	0.396784	0.0402387	D		ILMN_3242466	LOC100134170	NA	0.644767	-0.63315	0.014214	C
	ILMN_2414366	KAT5	10524	1.30914	0.388621	0.0419616	D		ILMN_1754757	SCNN1D	6339	0.645177	-0.632234	0.0340692	C
	ILMN_1698323	PLEKHB2	55041	1.28414	0.360807	0.0419616	D		ILMN_1726421	METTL9	51108	0.645192	-0.632201	0.0272754	C
	ILMN_1747525	LOC650780	NA	1.27056	0.345464	0.0265003	D		ILMN_2391976	SLC45A4	57210	0.646778	-0.628658	0.0239487	C
	ILMN_1727761	GMEB1	10691	1.26616	0.34046	0.0281858	D		ILMN_1674780	SF3B1	23451	0.647451	-0.627157	0.0128413	C
	ILMN_1700067	BTN3A2	11118	1.25676	0.329704	0.0281858	D		ILMN_1763364	WHAMM	123720	0.647908	-0.626139	0.0472209	C
	ILMN_1757294	PRSS42	NA	1.2214	0.28853	0.0226545	D		ILMN_3248086	C11ORF20	NA	0.648254	-0.625368	0.0171182	C
	ILMN_1706546	MAX	4149	1.21959	0.286398	0.01623	D		ILMN_1733288	C1RL	51279	0.649414	-0.62279	0.0337522	C
									ILMN_3214117	LOC100132870	NA	0.653109	-0.614604	0.00146006	C
									ILMN_2123665	SBF2	81846	0.6535	-0.613741	0.00740553	C
									ILMN_1769229	BCL2A1	597	0.654243	-0.612101	0.0342578	C
									ILMN_1676563	HTRA1	5654	0.65629	-0.607596	0.0134187	C
									ILMN_1793514	RPTOR	57521	0.656335	-0.607496	0.0137894	C
									ILMN_3242448	SNORA11D	100124541	0.65637	-0.60742	0.00619332	C
									ILMN_2155719	NBPF10	100132406	0.656643	-0.60682	0.0422601	C
									ILMN_1790228	FURIN	5045	0.656735	-0.606616	0.0453879	C
									ILMN_1745702	LOC646675	NA	0.65704	-0.605947	0.0268091	C
									ILMN_1814313	CREBL1	NA	0.65896	-0.601737	0.0340692	C
									ILMN_2199768	SLITRK4	139065	0.660162	-0.599109	0.0216841	C
									ILMN_1745368	TMEM50A	23585	0.660678	-0.597981	0.0047182	C
									ILMN_1813823	LOC149086	NA	0.663031	-0.592852	0.0199645	C
									ILMN_2141030	LOC641522	NA	0.663502	-0.591828	0.0322773	C
									ILMN_1750624	RXRG	6258	0.66378	-0.591223	0.0383188	C
									ILMN_1703196	PRKD3	23683	0.664161	-0.590395	0.0428436	C
									ILMN_1730136	LOC440389	NA	0.665571	-0.587334	0.0402387	C
									ILMN_1675830	LOC644950	NA	0.666321	-0.585711	0.0303828	C
									ILMN_2396786	ZNF266	10781	0.666376	-0.585593	0.00619332	C
									ILMN_1776953	MYL9	10398	0.666493	-0.585339	0.0216841	C
									ILMN_3263601	LOC100129093	NA	0.666651	-0.584996	0.0428256	C
									ILMN_3239198	LOC100132829	NA	0.666723	-0.58484	0.0262242	C
									ILMN_3247945	GOLGA7B	401647	0.667799	-0.582514	0.0272754	C
									ILMN_1714159	LUZP1	7798	0.66785	-0.582404	0.0340692	C
									ILMN_2303955	FKBP1B	2281	0.66846	-0.581087	0.0342578	C
									ILMN_1687369	LOC341112	NA	0.671487	-0.574568	0.0199645	C
									ILMN_2152711	ACVR2A	92	0.67194	-0.573596	0.0322773	C
									ILMN_1747019	PDYN	5173	0.672119	-0.573211	0.0184162	C
									ILMN_1797030	FGF18	8817	0.672534	-0.57232	0.0342578	C
									ILMN_1744574	TRUB1	142940	0.672582	-0.572218	0.0340692	C
									ILMN_1710092	ZBTB46	140685	0.673016	-0.571287	0.0373364	C
									ILMN_2276290	RALGPS2	55103	0.675244	-0.566519	0.0268091	C
									ILMN_3307483	MCF2L	23263	0.675378	-0.566233	0.0176723	C
									ILMN_1805973	GPR19	2842	0.675977	-0.564953	0.0171182	C
									ILMN_1794072	B3GAT1	27087	0.677044	-0.562679	0.0183978	C
									ILMN_1813645	NEK11	79858	0.677333	-0.562062	0.0453276	C
									ILMN_1782086	AOC3	8639	0.677433	-0.56185	0.0472209	C
									ILMN_1720059	HMBOX1	79618	0.677547	-0.561606	0.00619332	C
									ILMN_1792473	AIF1	199	0.678634	-0.559295	0.0485396	C
									ILMN_1657423	SPG21	51324	0.680415	-0.555513	0.0216841	C
									ILMN_1736954	ZBTB7B	51043	0.68049	-0.555353	0.00356863	C
									ILMN_1794470	ANKFY1	51479	0.681036	-0.554197	0.00453064	C
									ILMN_1735762	NPNT	255743	0.681111	-0.554039	0.0340692	C
									ILMN_1811227	LOC400145	NA	0.681647	-0.552903	0.0169247	C
									ILMN_1721876	TIMP2	7077	0.682687	-0.550703	0.0422601	C
									ILMN_1759232	IRS1	3667	0.683227	-0.549563	0.0134187	C
									ILMN_3223246	TBC1D3F	84218	0.684332	-0.547232	0.0216841	C
									ILMN_1667034	PDPR	55066	0.684601	-0.546664	0.0340692	C
									ILMN_1675579	TCEB1P3	NA	0.686285	-0.543119	0.0171182	C
									ILMN_2378696	GFM2	84340	0.686781	-0.542078	0.0342578	C
									ILMN_1718128	PABPC3	5042	0.687649	-0.540256	0.0422601	C
									ILMN_1810836	PDE5A	8654	0.688122	-0.539263	0.0214507	C
									ILMN_1771118	SLCO1B1	10599	0.688366	-0.538753	0.0214507	C
									ILMN_1683354	LOC644694	NA	0.688851	-0.537736	0.010415	C
									ILMN_3237099	LOC100134815	NA	0.689602	-0.536164	0.0303828	C
									ILMN_3243156	AHNAK2	113146	0.690808	-0.533644	0.0134187	C
									ILMN_1796710	PHC1	1911	0.691131	-0.532969	0.0422601	C
									ILMN_1732514	GALK2	2585	0.69256	-0.52999	0.0047182	C
									ILMN_2350114	TRIM13	10206	0.692651	-0.529799	0.0171182	C
									ILMN_1695418	IQGAP3	128239	0.694391	-0.526179	0.0107734	C
									ILMN_1683990	C1ORF89	NA	0.695385	-0.524116	0.0092178	C
									ILMN_1794632	POLR1B	84172	0.696248	-0.522326	0.00619332	C
									ILMN_1667966	C1ORF24	NA	0.696659	-0.521474	0.00356863	C
									ILMN_1795839	SCCPDH	51097	0.696734	-0.52132	0.0368884	C
									ILMN_1745154	PARD6B	84612	0.697214	-0.520326	0.0422601	C
									ILMN_1674633	UBE2H	7328	0.698927	-0.516787	0.0453276	C
									ILMN_1677719	CHST1	8534	0.699066	-0.5165	0.0104443	C
									ILMN_2092933	ADAMTS4	9507	0.700063	-0.514443	0.0137108	C
									ILMN_3237698	LOC100133503	NA	0.700321	-0.513912	0.0385612	C
									ILMN_1671272	PKD1L1	168507	0.701244	-0.512012	0.0184162	C
									ILMN_1660017	PRR5	55615	0.702955	-0.508496	0.0134187	C
									ILMN_1669362	IGFBP6	3489	0.703472	-0.507435	0.0216841	C
									ILMN_1716089	KANK2	25959	0.704405	-0.505524	0.00619332	C
									ILMN_1735006	ATG2B	55102	0.704981	-0.504343	0.0485396	C
									ILMN_1705602	KLHL17	339451	0.705234	-0.503827	0.0135873	C
									ILMN_3259148	LOC100129095	NA	0.705724	-0.502825	0.0347556	C
									ILMN_3243055	LOC732432	NA	0.706119	-0.502016	0.0183978	C
									ILMN_1726288	TMEM106B	54664	0.706285	-0.501677	0.0047182	C
									ILMN_1770697	LOC644063	NA	0.707107	-0.499999	0.0134187	C
									ILMN_2259495	BID	637	0.708736	-0.496679	0.0240277	C
									ILMN_1798311	MBTPS2	51360	0.709859	-0.494395	0.0385612	C
									ILMN_1658821	SAMD1	90378	0.710256	-0.493588	0.0149092	C
									ILMN_1747183	GXYLT1	283464	0.710409	-0.493278	0.0171182	C
									ILMN_2127624	UBE2CBP	NA	0.711676	-0.490707	0.0281858	C
									ILMN_1726786	TNRC6B	23112	0.713005	-0.488016	0.0422601	C
									ILMN_3305942	LOC729970	729970	0.713749	-0.486511	0.0118211	C
									ILMN_1660864	RHBDL1	9028	0.714101	-0.485799	0.0239487	C
									ILMN_2293631	MGAT5B	146664	0.714327	-0.485343	0.0297581	C
									ILMN_2158781	LOC650717	NA	0.714701	-0.484589	0.0171182	C
									ILMN_1813114	LOC654113	NA	0.714932	-0.484123	0.030639	C
									ILMN_3241104	LOC286135	NA	0.716374	-0.481216	0.0239487	C
									ILMN_3236694	LOC100132139	NA	0.716752	-0.480454	0.0268091	C
									ILMN_1668834	RSF1	51773	0.717006	-0.479943	0.0171182	C
									ILMN_1694041	PDCL	5082	0.717402	-0.479147	0.0216841	C
									ILMN_1796922	LOC116349	NA	0.717865	-0.478216	0.0347556	C
									ILMN_1669033	NCOA1	8648	0.718176	-0.47759	0.0409136	C
									ILMN_1758093	C14ORF101	NA	0.718414	-0.477112	0.0385612	C
									ILMN_1750386	NPPA	4878	0.718912	-0.476113	0.0383188	C
									ILMN_1761176	GRIPAP1	56850	0.720787	-0.472356	0.014138	C
									ILMN_1789879	WDR35	57539	0.720945	-0.472039	0.0340692	C
									ILMN_3238613	SNORA26	677810	0.722829	-0.468273	0.0342578	C
									ILMN_1806456	C14ORF45	NA	0.723202	-0.467529	0.0422601	C
									ILMN_1669286	YWHAZ	7534	0.725618	-0.462719	0.00807149	C
									ILMN_2226955	VOPP1	81552	0.726167	-0.461628	0.0272754	C
									ILMN_3311190	NCRNA00173	NA	0.727963	-0.458063	0.000573633	C
									ILMN_3241522	LOC392871	NA	0.729549	-0.454924	0.0216841	C
									ILMN_3249095	C22orf24	25775	0.730424	-0.453195	0.0226545	C
									ILMN_2177413	TBL3	10607	0.732345	-0.449404	0.0171182	C
									ILMN_1695468	SRPK2	6733	0.73272	-0.448667	0.0428436	C
									ILMN_1728810	NDUFS1	4719	0.732748	-0.44861	0.0199645	C
									ILMN_1781454	RAE1	8480	0.732877	-0.448357	0.00267971	C
									ILMN_1687707	LOC646795	NA	0.73303	-0.448055	0.0472209	C
									ILMN_1806003	SPEF2	79925	0.735591	-0.443024	0.0385612	C
									ILMN_1693119	LYPD6B	130576	0.73581	-0.442595	0.0272754	C
									ILMN_1814859	DDX47	51202	0.736731	-0.44079	0.0171182	C
									ILMN_1777794	PRKCSH	5589	0.736751	-0.440751	0.0171182	C
									ILMN_1669981	LOC728127	NA	0.73722	-0.439834	0.0422601	C
									ILMN_1810608	PNPT1	87178	0.737399	-0.439482	0.0272754	C
									ILMN_2360229	MAPKAP1	79109	0.737736	-0.438823	0.0340692	C
									ILMN_1660031	P2RY6	5031	0.738522	-0.437288	0.014214	C
									ILMN_1718449	NSUN5C	NA	0.739238	-0.435889	0.00619332	C
									ILMN_1761083	HNRNPA3	220988	0.739356	-0.435658	0.00807149	C
									ILMN_1655614	DSP	1832	0.739465	-0.435446	0.00619332	C
									ILMN_1764483	PSG2	5670	0.739688	-0.43501	0.0199645	C
									ILMN_1652521	MTMR9	66036	0.739705	-0.434979	0.0134187	C
									ILMN_1673119	AFF1	4299	0.740908	-0.432633	0.0385612	C
									ILMN_2363668	YIF1B	90522	0.740992	-0.43247	0.00199769	C
									ILMN_2169261	TNNI2	7136	0.741036	-0.432384	0.0134187	C
									ILMN_1815716	LMLN	89782	0.741225	-0.432017	0.00592087	C
									ILMN_1757350	CTNNB1	1499	0.74187	-0.430762	0.0216841	C
									ILMN_1673953	HRH1	3269	0.742045	-0.430421	0.0383188	C
									ILMN_1768097	RPGR	6103	0.743802	-0.427009	0.0237414	C
									ILMN_2126957	NOMO1	23420	0.743989	-0.426646	0.0303828	C
									ILMN_3188005	LOC100127913	NA	0.744245	-0.42615	0.000792268	C
									ILMN_1680738	C5ORF13	NA	0.74429	-0.426064	0.0272754	C
									ILMN_1743579	WDR4	10785	0.744413	-0.425825	0.0453276	C
									ILMN_1666746	LOC153561	NA	0.74484	-0.424998	0.0453879	C
									ILMN_3181420	HMGXB4	10042	0.745662	-0.423407	0.0216841	C
									ILMN_1784287	TGFBR3	7049	0.746595	-0.421602	0.0272754	C
									ILMN_3210511	LOC100132663	NA	0.748901	-0.417152	0.0313241	C
									ILMN_1779897	NPR1	4881	0.750527	-0.414025	0.0485396	C
									ILMN_2340877	MEN1	4221	0.751397	-0.412354	0.0104443	C
									ILMN_3285616	LOC100133478	NA	0.752939	-0.409396	0.0237414	C
									ILMN_1776398	PAIP1	10605	0.753303	-0.408698	0.0268091	C
									ILMN_3217771	LOC100133154	NA	0.753305	-0.408693	0.0303828	C
									ILMN_1732644	LOC441237	NA	0.753718	-0.407904	0.0373364	C
									ILMN_3292082	LOC642367	NA	0.75399	-0.407382	0.0422601	C
									ILMN_1691702	ZNF775	285971	0.754021	-0.407324	0.0137108	C
									ILMN_3308916	MIR1267	100302286	0.754102	-0.407169	0.0472209	C
									ILMN_2375386	RNPS1	10921	0.754535	-0.40634	0.0216841	C
									ILMN_1757081	SYN2	6854	0.755257	-0.404961	0.0485396	C
									ILMN_1714023	SLC9A5	6553	0.75552	-0.404459	0.0385612	C
									ILMN_1709334	TM9SF1	10548	0.756899	-0.401828	0.0340692	C
									ILMN_1787844	C19ORF10	NA	0.75759	-0.40051	0.00807149	C
									ILMN_2268529	KCNK10	54207	0.757778	-0.400153	0.0281858	C
									ILMN_1788832	MIB1	57534	0.75785	-0.400015	0.030639	C
									ILMN_1687978	PHLDA1	22822	0.759861	-0.396193	0.0134187	C
									ILMN_1755954	CPEB3	22849	0.760831	-0.394352	0.0272754	C
									ILMN_1797964	ARL6IP6	151188	0.760876	-0.394266	0.0340692	C
									ILMN_2361768	CHRNA1	1134	0.761242	-0.393573	0.0224789	C
									ILMN_1701558	MAP1A	4130	0.76146	-0.39316	0.0199645	C
									ILMN_1695317	RCBTB1	55213	0.761718	-0.392671	0.0199645	C
									ILMN_1678775	CLEC2D	29121	0.762443	-0.3913	0.0340692	C
									ILMN_1706418	EHMT1	79813	0.762786	-0.39065	0.0313241	C
									ILMN_1688728	TRMT2A	27037	0.763371	-0.389544	0.0199645	C
									ILMN_1687235	HPN	3249	0.763627	-0.38906	0.0443072	C
									ILMN_1787794	BMF	90427	0.763706	-0.388912	0.0485396	C
									ILMN_1688372	C3orf17	NA	0.765692	-0.385163	0.0405689	C
									ILMN_1736567	CD74	972	0.766453	-0.383731	0.0485396	C
									ILMN_1695731	TUBG1	7283	0.767023	-0.382657	0.00619332	C
									ILMN_3239000	LOC642617	NA	0.767109	-0.382496	0.0215563	C
									ILMN_1715214	PTPN7	5778	0.767273	-0.382188	0.0239487	C
									ILMN_3263290	LOC100129697	100129697	0.767602	-0.381569	0.0216841	C
									ILMN_3211199	LOC100131017	NA	0.769957	-0.377151	0.0368884	C
									ILMN_2373763	CASP7	840	0.770628	-0.375893	0.0104443	C
									ILMN_2203896	SMAD7	4092	0.771094	-0.375022	0.0272754	C
									ILMN_1769082	TXNDC5	81567	0.771152	-0.374912	0.0340692	C
									ILMN_1664118	LOC643665	NA	0.771625	-0.374028	0.0216841	C
									ILMN_3193560	LOC100128370	NA	0.77242	-0.372543	0.0198735	C
									ILMN_1707464	MST1	4485	0.772807	-0.37182	0.00199769	C
									ILMN_2149053	RIF1	55183	0.773361	-0.370787	0.0171182	C
									ILMN_1681760	LOC728518	NA	0.773694	-0.370164	0.0199645	C
									ILMN_3241568	LOC100134152	NA	0.773892	-0.369796	0.0422601	C
									ILMN_2346358	TAF1	6872	0.774523	-0.36862	0.0428256	C
									ILMN_1662483	SMA5	NA	0.775323	-0.36713	0.0216841	C
									ILMN_1674337	FKBP2	2286	0.77559	-0.366634	0.0272754	C
									ILMN_2404407	ABAT	18	0.775654	-0.366515	0.0272754	C
									ILMN_1719163	ZNF557	79230	0.775955	-0.365955	0.0422601	C
									ILMN_1676248	SEMA4G	57715	0.776824	-0.36434	0.0472209	C
									ILMN_1744914	FUCA2	2519	0.776932	-0.36414	0.0422601	C
									ILMN_1789830	CFLAR	8837	0.776969	-0.364071	0.0422601	C
									ILMN_1701477	CCDC101	NA	0.777052	-0.363916	0.0313241	C
									ILMN_1751264	CCDC126	90693	0.77857	-0.361102	0.0340692	C
									ILMN_2235454	COMMD5	28991	0.778584	-0.361075	0.0340692	C
									ILMN_2047676	OSGEPL1	64172	0.77908	-0.360157	0.0272754	C
									ILMN_1787954	LOC645015	NA	0.779244	-0.359852	0.0262242	C
									ILMN_2388466	TIA1	7072	0.77948	-0.359416	0.0272754	C
									ILMN_2408572	RNASE4	6038	0.77952	-0.359341	0.0216841	C
									ILMN_1685763	WDR45L	NA	0.779551	-0.359284	0.0422601	C
									ILMN_1755990	ATP6AP1L	92270	0.779558	-0.359271	0.0385612	C
									ILMN_1706553	SMG7	9887	0.779656	-0.35909	0.0171182	C
									ILMN_1813625	TRIM25	7706	0.779808	-0.35881	0.0340692	C
									ILMN_1712390	CUTA	51596	0.780342	-0.357822	0.0303828	C
									ILMN_1742450	TAPBP	6892	0.780346	-0.357814	0.00807149	C
									ILMN_1742578	MKLN1	4289	0.780741	-0.357083	0.0272754	C
									ILMN_1655577	TIAM1	7074	0.780938	-0.35672	0.0268091	C
									ILMN_3248122	MED1	5469	0.781201	-0.356234	0.0216841	C
									ILMN_1766793	C9ORF23	NA	0.781419	-0.355831	0.0422601	C
									ILMN_3238344	VWA3A	146177	0.782184	-0.35442	0.00807149	C
									ILMN_1667138	S100A13	6284	0.782363	-0.354089	0.0337522	C
									ILMN_1780153	QTRT1	81890	0.782475	-0.353883	0.0272754	C
									ILMN_1741881	C9ORF72	NA	0.782941	-0.353025	0.0422601	C
									ILMN_1726387	NF1	4763	0.78304	-0.352841	0.0385612	C
									ILMN_1692589	LOC728723	NA	0.783327	-0.352314	0.0251815	C
									ILMN_1796490	GRINA	2907	0.78384	-0.351369	0.0340692	C
									ILMN_1769290	TTC39B	158219	0.784039	-0.351003	0.0340692	C
									ILMN_1747968	RBM33	155435	0.784082	-0.350924	0.0272754	C
									ILMN_1765779	ADAM17	6868	0.784609	-0.349955	0.0184162	C
									ILMN_2104409	RPL29P2	118432	0.785791	-0.347782	0.0340692	C
									ILMN_1783843	MIIP	60672	0.785873	-0.347632	0.0171182	C
									ILMN_1745513	MCAT	27349	0.786421	-0.346627	0.0216841	C
									ILMN_1741253	UBR5	51366	0.78719	-0.345216	0.0340692	C
									ILMN_3294322	LOC441009	NA	0.789094	-0.34173	0.0303828	C
									ILMN_2374778	DUT	1854	0.789103	-0.341714	0.0216841	C
									ILMN_3247895	LOC728188	NA	0.789235	-0.341473	0.0340692	C
									ILMN_1804737	RAVER2	55225	0.789304	-0.341347	0.0340692	C
									ILMN_1736700	ALDOA	226	0.789584	-0.340835	0.0422601	C
									ILMN_2306955	ACPL2	NA	0.789984	-0.340104	0.0340692	C
									ILMN_1719599	SYTL4	94121	0.790481	-0.339197	0.0272754	C
									ILMN_1698191	SCML2	10389	0.791722	-0.336934	0.0134187	C
									ILMN_1651538	NUMBL	9253	0.791971	-0.336481	0.018129	C
									ILMN_2353327	RNF38	152006	0.792316	-0.335851	0.00356863	C
									ILMN_1756989	EPHA8	2046	0.793604	-0.333508	0.0422601	C
									ILMN_1757660	CAPS	828	0.794256	-0.332323	0.0422601	C
									ILMN_1674334	LOC653354	NA	0.794346	-0.33216	0.0216841	C
									ILMN_2055271	A1BG	1	0.79484	-0.331264	0.0149092	C
									ILMN_1803018	KIFC2	90990	0.794853	-0.331239	0.0171182	C
									ILMN_1680626	PDIA6	10130	0.794964	-0.331038	0.00619332	C
									ILMN_1755051	EFHC1	114327	0.795146	-0.330708	0.0422601	C
									ILMN_1745962	FBXO7	25793	0.79518	-0.330646	0.00740553	C
									ILMN_1658160	FAM156A	29057	0.795418	-0.330215	0.0272754	C
									ILMN_1806733	COL18A1	80781	0.795459	-0.33014	0.0171182	C
									ILMN_2166686	NUFIP1	26747	0.796667	-0.327951	0.0176723	C
									ILMN_1743324	TBC1D12	23232	0.797293	-0.326818	0.0347556	C
									ILMN_1656676	ZYG11B	79699	0.797404	-0.326616	0.0216841	C
									ILMN_1666924	PINK1	65018	0.798016	-0.325511	0.0340692	C
									ILMN_1708605	LOC652481	NA	0.798182	-0.325211	0.0134187	C
									ILMN_1720850	BAZ2B	29994	0.798332	-0.324939	0.0104443	C
									ILMN_1705231	SLCO2A1	6578	0.798603	-0.32445	0.0357638	C
									ILMN_1737343	FNIP1	96459	0.798655	-0.324357	0.0340692	C
									ILMN_1652277	SECTM1	6398	0.798665	-0.324337	0.0176723	C
									ILMN_1704196	DSG2	1829	0.798918	-0.323881	0.0422601	C
									ILMN_3200652	LOC100131308	NA	0.799287	-0.323215	0.0357638	C
									ILMN_1699631	GATS	NA	0.799895	-0.322117	0.0385612	C
									ILMN_3251440	PIK3C2A	5286	0.800201	-0.321565	0.0272754	C
									ILMN_1712046	CPXM1	56265	0.801001	-0.320125	0.0272754	C
									ILMN_1691480	LONP2	83752	0.801038	-0.320058	0.0422601	C
									ILMN_2257833	BBS7	55212	0.801219	-0.319731	0.0340692	C
									ILMN_1727532	OLFML3	56944	0.801773	-0.318734	0.0422601	C
									ILMN_2351230	RUFY3	22902	0.802079	-0.318184	0.0134187	C
									ILMN_1654392	KHNYN	23351	0.802275	-0.317831	0.0171182	C
									ILMN_1765606	YAF2	10138	0.803115	-0.316322	0.00534099	C
									ILMN_3178302	FNDC3B	64778	0.803651	-0.31536	0.0171182	C
									ILMN_1665164	CTR9	9646	0.803686	-0.315297	0.0134187	C
									ILMN_1663799	RPL32	6161	0.803832	-0.315035	0.0422601	C
									ILMN_1658830	C10ORF26	NA	0.804175	-0.31442	0.0340692	C
									ILMN_1728426	INPPL1	3636	0.804203	-0.314369	0.0340692	C
									ILMN_1686725	DICER1	23405	0.804358	-0.314091	0.0340692	C
									ILMN_2375973	ALKBH1	8846	0.805593	-0.311878	0.0340692	C
									ILMN_1651958	MGP	4256	0.80602	-0.311112	0.0422601	C
									ILMN_1673108	AP2A1	160	0.806264	-0.310676	0.0340692	C
									ILMN_2291891	CFL2	1073	0.806834	-0.309657	0.0272754	C
									ILMN_1682996	VWA5A	4013	0.80686	-0.309609	0.0340692	C
									ILMN_3236346	LOC100132901	NA	0.807195	-0.309011	0.0272754	C
									ILMN_2132898	SPRN	503542	0.807439	-0.308575	0.0216841	C
									ILMN_1729973	ZC3HAV1	56829	0.807769	-0.307986	0.0340692	C
									ILMN_1764628	LYPLA2	11313	0.807928	-0.307702	0.00619332	C
									ILMN_1804530	LOC653888	NA	0.809261	-0.305322	0.0340692	C
									ILMN_1752927	KIAA1600	NA	0.809385	-0.305102	0.0216841	C
									ILMN_1774427	CALCOCO1	57658	0.809481	-0.304932	0.0340692	C
									ILMN_1772208	CCDC88B	283234	0.809669	-0.304596	0.0373364	C
									ILMN_1683231	FAM83F	113828	0.809743	-0.304465	0.0047182	C
									ILMN_2367458	UFD1L	NA	0.809792	-0.304376	0.0409136	C
									ILMN_1702301	DOCK10	55619	0.810033	-0.303947	0.0485396	C
									ILMN_2359453	ERGIC3	51614	0.811465	-0.301399	0.0134187	C
									ILMN_1771260	B3GNT4	79369	0.811499	-0.301339	0.00619332	C
									ILMN_1811327	MRPL27	51264	0.811561	-0.301228	0.0171182	C
									ILMN_1803691	ARTN	9048	0.8121	-0.300271	0.0340692	C
									ILMN_2139761	LIMCH1	22998	0.364524	-1.45592	0.0189035	D
									ILMN_1752952	MMP28	79148	0.383003	-1.38457	0.0226545	D
									ILMN_2327203	POT1	25913	0.419835	-1.25211	0.0419616	D
									ILMN_1654429	C12ORF48	NA	0.424624	-1.23574	0.01623	D
									ILMN_1791328	STK39	27347	0.432042	-1.21076	0.01623	D
									ILMN_3237698	LOC100133503	NA	0.444706	-1.16908	0.0265003	D
									ILMN_3242818	RNU105C	26766	0.47662	-1.06909	0.01623	D
									ILMN_1773620	SMARCC2	6601	0.488429	-1.03378	0.0265003	D
									ILMN_3185784	LOC100125556	NA	0.494124	-1.01705	0.0189035	D
									ILMN_2350114	TRIM13	10206	0.495956	-1.01172	0.0265003	D
									ILMN_2070896	BMPR2	659	0.497487	-1.00727	0.0419616	D
									ILMN_2133146	NUDT21	11051	0.510978	-0.968666	0.0419616	D
									ILMN_1764166	BCKDHB	594	0.511085	-0.968364	0.01623	D
									ILMN_1693879	RANBP3L	202151	0.517966	-0.949072	0.0265003	D
									ILMN_2233366	ASAP1	50807	0.524369	-0.931347	0.0265003	D
									ILMN_1708110	TMEM144	55314	0.525873	-0.927213	0.01623	D
									ILMN_3260345	AGFG1	3267	0.530273	-0.915192	0.0265003	D
									ILMN_2128623	LOC285359	NA	0.536116	-0.899383	0.0419616	D
									ILMN_1666276	LOC643451	NA	0.537281	-0.89625	0.0189035	D
									ILMN_1746699	SGOL2	NA	0.53852	-0.892927	0.0265003	D
									ILMN_1713266	FAM46C	NA	0.540715	-0.887061	0.0265003	D
									ILMN_3229227	LOC729629	NA	0.546016	-0.872984	0.01623	D
									ILMN_2395913	ARHGAP11A	9824	0.546733	-0.871092	0.0189035	D
									ILMN_1683234	DNAJC1	64215	0.546789	-0.870944	0.01623	D
									ILMN_2361603	NDRG2	57447	0.549899	-0.86276	0.0265003	D
									ILMN_1680643	KIAA1333	NA	0.551479	-0.858623	0.0419616	D
									ILMN_1727589	SULT2B1	6820	0.556167	-0.846411	0.0226545	D
									ILMN_2341595	KITLG	4254	0.556805	-0.844757	0.0419616	D
									ILMN_1651259	FLJ36848	NA	0.556902	-0.844506	0.0320887	D
									ILMN_1738179	FOXP1	27086	0.557649	-0.842571	0.0265003	D
									ILMN_1695991	COLQ	8292	0.559378	-0.838106	0.0265003	D
									ILMN_3248635	LOC100133744	NA	0.559878	-0.836817	0.0265003	D
									ILMN_1771120	TMEM45B	120224	0.560092	-0.836265	0.0419616	D
									ILMN_3248970	LOC100134266	NA	0.56103	-0.83385	0.0265003	D
									ILMN_1794844	THRSP	7069	0.561312	-0.833124	0.01623	D
									ILMN_1788059	PCGF5	84333	0.563184	-0.828322	0.0419616	D
									ILMN_1783806	DTNBP1	84062	0.564185	-0.825759	0.0265003	D
									ILMN_3246732	C16ORF88	NA	0.56582	-0.821585	0.0419616	D
									ILMN_1755051	EFHC1	114327	0.567023	-0.81852	0.01623	D
									ILMN_1715273	PICALM	8301	0.567529	-0.817234	0.0419616	D
									ILMN_1789879	WDR35	57539	0.570314	-0.810173	0.01623	D
									ILMN_3178302	FNDC3B	64778	0.57059	-0.809475	0.01623	D
									ILMN_1742124	KIAA1128	NA	0.571469	-0.807252	0.0265003	D
									ILMN_1685856	FAM92A1	NA	0.572729	-0.804076	0.0189035	D
									ILMN_1672795	SH2D5	400745	0.574165	-0.800462	0.0265003	D
									ILMN_1795118	SIDT1	54847	0.5743	-0.800123	0.0265003	D
									ILMN_1702105	EFS	10278	0.57471	-0.799094	0.0419616	D
									ILMN_1659923	GNAQ	2776	0.575576	-0.796921	0.0419616	D
									ILMN_1684461	CADPS2	93664	0.5785	-0.789612	0.0265003	D
									ILMN_1757019	NTN4	59277	0.581244	-0.782784	0.0419616	D
									ILMN_2325574	CASC4	113201	0.58138	-0.782446	0.01623	D
									ILMN_1712608	BFSP1	631	0.582171	-0.780486	0.0419616	D
									ILMN_2190850	PPID	5481	0.583373	-0.77751	0.0402387	D
									ILMN_1690223	CNTNAP2	26047	0.583711	-0.776674	0.0265003	D
									ILMN_1714364	PTK2	5747	0.585303	-0.772743	0.01623	D
									ILMN_2332267	CSNK1G3	1456	0.587678	-0.766902	0.0419616	D
									ILMN_1668507	DDAH1	23576	0.587954	-0.766224	0.0265003	D
									ILMN_1658356	PAMR1	25891	0.589422	-0.762628	0.0419616	D
									ILMN_1661160	C3ORF55	NA	0.589844	-0.761595	0.0419616	D
									ILMN_1668027	LOC727762	NA	0.591137	-0.758436	0.0419616	D
									ILMN_3287855	LOC100131578	NA	0.591272	-0.758107	0.01623	D
									ILMN_3230683	RUNDC2B	NA	0.591316	-0.757999	0.0320887	D
									ILMN_1782429	TMEM56	NA	0.591551	-0.757425	0.0265003	D
									ILMN_1783497	PANK1	53354	0.591605	-0.757294	0.0419616	D
									ILMN_2410371	CD79A	973	0.591721	-0.757012	0.0451269	D
									ILMN_1717261	HLA-DRB3	3125	0.591748	-0.756945	0.0265003	D
									ILMN_1803818	NMNAT2	23057	0.59308	-0.7537	0.0189035	D
									ILMN_1680580	LOC148709	148709	0.5937	-0.752193	0.0265003	D
									ILMN_3256801	C1orf203	NA	0.593753	-0.752065	0.0189035	D
									ILMN_1669631	GLRB	2743	0.593777	-0.752006	0.01623	D
									ILMN_1813191	LOC653080	NA	0.59574	-0.747245	0.0265003	D
									ILMN_2123665	SBF2	81846	0.596882	-0.744482	0.0320887	D
									ILMN_1787954	LOC645015	NA	0.599106	-0.739117	0.0402387	D
									ILMN_1743137	BAT2D1	NA	0.600445	-0.735897	0.0265003	D
									ILMN_1654452	LOC441378	NA	0.600635	-0.73544	0.0419616	D
									ILMN_3238148	LOC100133435	NA	0.601771	-0.732713	0.0419616	D
									ILMN_2382309	TCL1B	9623	0.602752	-0.730363	0.0226545	D
									ILMN_2166384	IPO5	3843	0.60686	-0.720563	0.0419616	D
									ILMN_2177413	TBL3	10607	0.606923	-0.720414	0.0419616	D
									ILMN_1814077	ZFPM2	23414	0.607051	-0.72011	0.0226545	D
									ILMN_1652277	SECTM1	6398	0.6086	-0.716434	0.0226545	D
									ILMN_1805992	KIAA1598	NA	0.60949	-0.714327	0.0265003	D
									ILMN_1700888	ENPP1	5167	0.609904	-0.713347	0.0265003	D
									ILMN_2369403	PALM2	NA	0.610211	-0.71262	0.01623	D
									ILMN_1674658	COX7B2	170712	0.611373	-0.709875	0.0419616	D
									ILMN_1807894	SLC7A8	23428	0.61163	-0.709269	0.0419616	D
									ILMN_1720965	TULP4	56995	0.612049	-0.708281	0.0419616	D
									ILMN_3226641	PLA2G16	NA	0.612359	-0.70755	0.0419616	D
									ILMN_1734880	LOC644128	NA	0.612584	-0.707019	0.0451269	D
									ILMN_1698777	ADCK1	57143	0.612788	-0.70654	0.0265003	D
									ILMN_1769720	STAU2	27067	0.612954	-0.70615	0.0265003	D
									ILMN_1796397	CISD2	493856	0.613895	-0.703936	0.0265003	D
									ILMN_1687840	ABCB7	22	0.614091	-0.703475	0.01623	D
									ILMN_1673773	GALNTL4	NA	0.614962	-0.70143	0.0419616	D
									ILMN_1772521	MTHFD1L	25902	0.615962	-0.699087	0.01623	D
									ILMN_1660810	TTC17	55761	0.61602	-0.698951	0.01623	D
									ILMN_1733690	AKAP7	9465	0.617208	-0.696171	0.0419616	D
									ILMN_1747355	CCL3L1	6349	0.617233	-0.696112	0.0189035	D
									ILMN_3306168	MOBKL3	NA	0.617291	-0.695978	0.0419616	D
									ILMN_1686884	IL1RAP	3556	0.617605	-0.695245	0.0265003	D
									ILMN_1804562	SLC31A1	1317	0.618393	-0.693404	0.0419616	D
									ILMN_1651538	NUMBL	9253	0.618753	-0.692566	0.0189035	D
									ILMN_1789505	ITPR1	3708	0.618849	-0.692341	0.01623	D
									ILMN_1698725	FRMD3	257019	0.619096	-0.691765	0.01623	D
									ILMN_1740960	MACROD1	28992	0.619718	-0.690317	0.0419616	D
									ILMN_1773561	RAP2C	57826	0.620651	-0.688145	0.0265003	D
									ILMN_1794803	NDP	4693	0.620861	-0.687659	0.0419616	D
									ILMN_1732514	GALK2	2585	0.621311	-0.686613	0.0265003	D
									ILMN_1778240	GFOD1	54438	0.621792	-0.685496	0.0419616	D
									ILMN_1730487	CALD1	800	0.621859	-0.68534	0.0419616	D
									ILMN_2220729	CLEC3A	10143	0.622223	-0.684497	0.01623	D
									ILMN_2182335	ARID2	196528	0.622415	-0.68405	0.0265003	D
									ILMN_3236536	IMMP1L	196294	0.622802	-0.683154	0.0402387	D
									ILMN_1776516	ITPKA	3706	0.623095	-0.682476	0.0265003	D
									ILMN_2140510	KLHL13	90293	0.62334	-0.681908	0.0419616	D
									ILMN_1693119	LYPD6B	130576	0.62338	-0.681815	0.01623	D
									ILMN_2307266	ARL6	84100	0.623612	-0.681279	0.0419616	D
									ILMN_1792497	HRB	NA	0.623966	-0.680461	0.0419616	D
									ILMN_1774930	CDC14A	8556	0.624253	-0.679798	0.0189035	D
									ILMN_1659843	DNAJC3	5611	0.624743	-0.678664	0.01623	D
									ILMN_1872276	MMAB	326625	0.62476	-0.678627	0.0265003	D
									ILMN_1806825	C14ORF145	NA	0.62502	-0.678026	0.0419616	D
									ILMN_2372398	ALDH5A1	7915	0.625972	-0.67583	0.0265003	D
									ILMN_1778505	LOC642771	NA	0.626215	-0.675269	0.0419616	D
									ILMN_3248591	LTBP2	4053	0.626305	-0.675063	0.01623	D
									ILMN_1714397	CRYL1	51084	0.627476	-0.672368	0.0265003	D
									ILMN_2396786	ZNF266	10781	0.627784	-0.67166	0.01623	D
									ILMN_1721680	LOC644075	NA	0.629739	-0.667173	0.0265003	D
									ILMN_3241522	LOC392871	NA	0.629864	-0.666889	0.01623	D
									ILMN_3247462	GLRX3	10539	0.630459	-0.665526	0.01623	D
									ILMN_1784651	NAGA	4668	0.631686	-0.662721	0.01623	D
									ILMN_1664153	SLC30A5	64924	0.631755	-0.662562	0.01623	D
									ILMN_1749410	PKP4	8502	0.632969	-0.659793	0.0419616	D
									ILMN_1776297	GOLGA4	2803	0.633463	-0.658668	0.0265003	D
									ILMN_1830462	XYLT1	64131	0.634203	-0.656984	0.0226545	D
									ILMN_1720511	LRRN1	57633	0.634222	-0.65694	0.01623	D
									ILMN_1770548	CLASP2	23122	0.635355	-0.654364	0.0419616	D
									ILMN_1693259	PDCD6IP	10015	0.635571	-0.653876	0.0419616	D
									ILMN_2230892	IL10RB	3588	0.635942	-0.653032	0.0419616	D
									ILMN_3237099	LOC100134815	NA	0.637072	-0.650472	0.0265003	D
									ILMN_1784447	PLCE1	51196	0.637905	-0.648586	0.01623	D
									ILMN_1810962	PTPRK	5796	0.638	-0.648371	0.0265003	D
									ILMN_1794632	POLR1B	84172	0.638931	-0.646268	0.0265003	D
									ILMN_2186482	TMED7	51014	0.639298	-0.64544	0.0265003	D
									ILMN_2203768	PRR15	222171	0.639685	-0.644567	0.0281858	D
									ILMN_1685930	DNAJC24	120526	0.640189	-0.643431	0.01623	D
									ILMN_2413259	SOCS4	122809	0.640968	-0.641675	0.01623	D
									ILMN_1687785	PPA2	27068	0.641103	-0.641372	0.01623	D
									ILMN_1806634	NNT	23530	0.641347	-0.640823	0.0419616	D
									ILMN_3179891	LOC100128007	100128007	0.641366	-0.64078	0.0265003	D
									ILMN_1789351	SUV39H2	79723	0.641374	-0.640763	0.0189035	D
									ILMN_1700257	C4ORF32	NA	0.642022	-0.639306	0.0265003	D
									ILMN_1792885	CTSC	1075	0.643842	-0.635221	0.01623	D
									ILMN_1803977	GALNT1	2589	0.644065	-0.634722	0.0419616	D
									ILMN_2366967	WT1	7490	0.644765	-0.633155	0.01623	D
									ILMN_2232712	MYO10	4651	0.644861	-0.63294	0.0419616	D
									ILMN_1706764	GOLPH3L	55204	0.645906	-0.630604	0.0419616	D
									ILMN_2042305	LOC642341	NA	0.64622	-0.629903	0.01623	D
									ILMN_1714349	GLCE	26035	0.64702	-0.628118	0.0419616	D
									ILMN_1781472	CDC42BPA	8476	0.647788	-0.626406	0.01623	D
									ILMN_2339748	RNF13	11342	0.647795	-0.62639	0.0419616	D
									ILMN_1718629	NRIP1	8204	0.647842	-0.626286	0.0419616	D
									ILMN_2228180	MSRA	4482	0.648754	-0.624256	0.01623	D
									ILMN_1709334	TM9SF1	10548	0.649488	-0.622625	0.0265003	D
									ILMN_2150019	SUCLA2	8803	0.650158	-0.621139	0.0265003	D
									ILMN_1778684	BRE	NA	0.650276	-0.620876	0.01623	D
									ILMN_1706232	LOC644852	NA	0.650308	-0.620805	0.0226545	D
									ILMN_1749962	NCAM2	4685	0.650666	-0.620011	0.0265003	D
									ILMN_1742827	EXOC4	60412	0.651121	-0.619003	0.0265003	D
									ILMN_1811289	COL4A6	1288	0.651392	-0.618403	0.01623	D
									ILMN_1702835	SH3BGRL	6451	0.651667	-0.617794	0.0419616	D
									ILMN_1779706	TP53BP2	7159	0.651702	-0.617715	0.0265003	D
									ILMN_2364174	CSNK1A1	1452	0.652034	-0.61698	0.01623	D
									ILMN_3235917	DCAF10	79269	0.652149	-0.616726	0.0265003	D
									ILMN_1658439	C5ORF44	NA	0.65291	-0.615044	0.01623	D
									ILMN_3309143	MIR9-1	407046	0.653015	-0.614812	0.0368884	D
									ILMN_1753515	SRR	63826	0.653091	-0.614644	0.0419616	D
									ILMN_1673820	HLTF	6596	0.653435	-0.613885	0.0419616	D
									ILMN_1690352	ADO	84890	0.653471	-0.613804	0.01623	D
									ILMN_1788783	TRAM2	9697	0.653851	-0.612966	0.0265003	D
									ILMN_1670438	PRAMEF7	441871	0.654514	-0.611504	0.0265003	D
									ILMN_3307892	PARVA	55742	0.655467	-0.609404	0.0419616	D
									ILMN_3272590	LOC100129975	NA	0.655516	-0.609297	0.0265003	D
									ILMN_3287952	LOC100133800	NA	0.655657	-0.608987	0.0419616	D
									ILMN_1731610	ABLIM1	3983	0.655686	-0.608922	0.0265003	D
									ILMN_1735157	GALNT12	79695	0.655705	-0.608881	0.01623	D
									ILMN_2283597	FAM134B	NA	0.6577	-0.604498	0.0419616	D
									ILMN_2134062	ALKBH3	221120	0.658275	-0.603237	0.0265003	D
									ILMN_1741440	SLC35A1	10559	0.658506	-0.602732	0.0265003	D
									ILMN_2408576	FAM129B	NA	0.658553	-0.602628	0.01623	D
									ILMN_2202967	ARL15	54622	0.659258	-0.601086	0.0419616	D
									ILMN_2311278	ADD3	120	0.659358	-0.600867	0.0226545	D
									ILMN_1712305	CYBRD1	79901	0.659588	-0.600363	0.01623	D
									ILMN_1727466	KCNMB4	27345	0.659592	-0.600355	0.0419616	D
									ILMN_1690017	SPINK5	11005	0.659881	-0.599722	0.0265003	D
									ILMN_1690034	SOD3	6649	0.659943	-0.599587	0.0419616	D
									ILMN_1755120	MAN1A2	10905	0.660079	-0.59929	0.0419616	D
									ILMN_1666746	LOC153561	NA	0.660299	-0.598809	0.0419616	D
									ILMN_3242448	SNORA11D	100124541	0.661087	-0.597089	0.01623	D
									ILMN_1802203	ARF1	375	0.6615	-0.596186	0.0265003	D
									ILMN_1678922	HERC4	26091	0.661679	-0.595796	0.0265003	D
									ILMN_2115991	TNNT1	7138	0.662066	-0.594953	0.01623	D
									ILMN_3237617	RNU5A	NA	0.662288	-0.594471	0.01623	D
									ILMN_1705080	SLURP1	57152	0.662354	-0.594325	0.0189035	D
									ILMN_1686392	NBAS	51594	0.662388	-0.594252	0.0419616	D
									ILMN_1804384	ASMTL	8623	0.662468	-0.594078	0.01623	D
									ILMN_1812073	ATP6V1B1	525	0.662713	-0.593545	0.01623	D
									ILMN_2053567	FASTKD2	22868	0.66273	-0.593507	0.01623	D
									ILMN_1799015	PXMP2	5827	0.662997	-0.592926	0.0265003	D
									ILMN_1680130	DYM	54808	0.663384	-0.592084	0.01623	D
									ILMN_1658607	DLEU2	8847	0.66397	-0.590811	0.0265003	D
									ILMN_1784287	TGFBR3	7049	0.664041	-0.590656	0.01623	D
									ILMN_3214117	LOC100132870	NA	0.664305	-0.590083	0.0189035	D
									ILMN_1695316	SLC39A8	64116	0.664353	-0.589978	0.0419616	D
									ILMN_3271630	FGGY	55277	0.664562	-0.589525	0.01623	D
									ILMN_1695418	IQGAP3	128239	0.664656	-0.58932	0.0419616	D
									ILMN_2213199	KIAA1712	NA	0.665021	-0.588529	0.0419616	D
									ILMN_1726387	NF1	4763	0.665268	-0.587993	0.0320887	D
									ILMN_1676088	MSRB3	253827	0.66567	-0.587121	0.01623	D
									ILMN_1797950	EXTL2	2135	0.665778	-0.586887	0.0265003	D
									ILMN_1654571	FCHO1	23149	0.666232	-0.585903	0.0320887	D
									ILMN_1786125	CCNA2	890	0.666895	-0.584468	0.0419616	D
									ILMN_3305339	UBA5	79876	0.667143	-0.583931	0.0419616	D
									ILMN_1680239	NUDT9	53343	0.667207	-0.583794	0.01623	D
									ILMN_1707763	ST7	7982	0.667331	-0.583525	0.01623	D
									ILMN_2402766	AFTPH	54812	0.667421	-0.583331	0.0265003	D
									ILMN_3245650	IGDCC3	9543	0.667827	-0.582453	0.01623	D
									ILMN_2297765	KCNMA1	3778	0.66786	-0.582381	0.01623	D
									ILMN_2360229	MAPKAP1	79109	0.668068	-0.581933	0.01623	D
									ILMN_2132809	ARHGEF10	9639	0.668282	-0.581472	0.01623	D
									ILMN_1655876	TMEM159	57146	0.668466	-0.581075	0.0419616	D
									ILMN_1738572	USP48	84196	0.668548	-0.580896	0.0189035	D
									ILMN_1699214	LOC647450	NA	0.66894	-0.580051	0.01623	D
									ILMN_1773968	SERBP1	26135	0.669105	-0.579695	0.0419616	D
									ILMN_1762606	AQP11	282679	0.669672	-0.578473	0.01623	D
									ILMN_1728380	PHOSPHO2	493911	0.669759	-0.578286	0.01623	D
									ILMN_1674135	RALGPS1	9649	0.671135	-0.575324	0.01623	D
									ILMN_3242205	GMPS	8833	0.671152	-0.57529	0.0419616	D
									ILMN_1693004	C20ORF117	NA	0.671222	-0.575139	0.0265003	D
									ILMN_1737965	ELOVL4	6785	0.671233	-0.575115	0.01623	D
									ILMN_1696099	ALDH4A1	8659	0.671429	-0.574694	0.0265003	D
									ILMN_1778168	ELMO2	63916	0.671608	-0.574309	0.0320887	D
									ILMN_2405534	GAB1	2549	0.671851	-0.573786	0.0189035	D
									ILMN_1706957	BMPR1A	657	0.672772	-0.571811	0.01623	D
									ILMN_1702279	KIF3B	9371	0.672864	-0.571613	0.01623	D
									ILMN_1671686	EPB49	NA	0.672865	-0.571612	0.0419616	D
									ILMN_1767481	XRCC6BP1	NA	0.673995	-0.569191	0.0419616	D
									ILMN_1815063	PXK	54899	0.674437	-0.568244	0.0265003	D
									ILMN_1727444	C16ORF53	NA	0.674697	-0.567688	0.01623	D
									ILMN_1706344	ABHD6	57406	0.674751	-0.567573	0.0419616	D
									ILMN_1808783	STRBP	55342	0.674816	-0.567435	0.01623	D
									ILMN_2405297	NOTCH2	4853	0.675013	-0.567013	0.01623	D
									ILMN_1772302	MTHFS	10588	0.675323	-0.56635	0.0419616	D
									ILMN_2356895	MRPL42	28977	0.67578	-0.565374	0.0419616	D
									ILMN_1670325	SLC47A1	55244	0.676098	-0.564697	0.01623	D
									ILMN_1733249	GNB4	59345	0.67641	-0.56403	0.0265003	D
									ILMN_1667966	C1ORF24	NA	0.67643	-0.563988	0.01623	D
									ILMN_1684440	PXN	5829	0.676657	-0.563503	0.0265003	D
									ILMN_1692365	KCTD1	284252	0.677065	-0.562633	0.0281858	D
									ILMN_1719759	TNC	3371	0.677161	-0.562428	0.01623	D
									ILMN_2106167	RAP1GDS1	5910	0.677179	-0.56239	0.01623	D
									ILMN_2310621	ATP5J2	NA	0.677311	-0.56211	0.01623	D
									ILMN_3287266	LOC100133328	NA	0.6774	-0.561921	0.0419616	D
									ILMN_1790352	PIGZ	80235	0.6774	-0.561921	0.0265003	D
									ILMN_2131880	DPY30	84661	0.677948	-0.560753	0.0419616	D
									ILMN_1721876	TIMP2	7077	0.678056	-0.560524	0.0419616	D
									ILMN_1794863	CAMK2N1	55450	0.678097	-0.560437	0.0265003	D
									ILMN_1764770	MGC15763	NA	0.67851	-0.559559	0.0419616	D
									ILMN_2260392	ACTR3B	57180	0.678794	-0.558954	0.0419616	D
									ILMN_1665235	CRTAP	10491	0.678977	-0.558565	0.0419616	D
									ILMN_1771238	CHM	1121	0.679364	-0.557743	0.01623	D
									ILMN_1744574	TRUB1	142940	0.679467	-0.557525	0.0419616	D
									ILMN_1683995	HCG18	414777	0.679534	-0.557384	0.01623	D
									ILMN_1713846	PPM1H	57460	0.679651	-0.557134	0.01623	D
									ILMN_2132898	SPRN	503542	0.680031	-0.556328	0.01623	D
									ILMN_1687743	BTBD7	55727	0.680476	-0.555383	0.0419616	D
									ILMN_2364864	MB	4151	0.680518	-0.555295	0.0419616	D
									ILMN_2306565	MTX2	10651	0.680595	-0.555131	0.01623	D
									ILMN_1793290	WDR60	55112	0.681159	-0.553937	0.01623	D
									ILMN_1678541	ATRN	8455	0.681365	-0.553501	0.01623	D
									ILMN_1767448	LHFP	NA	0.68142	-0.553383	0.01623	D
									ILMN_1781691	TRAK2	66008	0.681557	-0.553094	0.0265003	D
									ILMN_1659631	LOC730024	NA	0.6821	-0.551944	0.0419616	D
									ILMN_1811836	DYNC2LI1	51626	0.682176	-0.551784	0.0265003	D
									ILMN_3244574	KIAA1430	NA	0.682275	-0.551576	0.01623	D
									ILMN_1773901	STX12	23673	0.682576	-0.55094	0.0265003	D
									ILMN_2324574	RALGAPA1	253959	0.682731	-0.550612	0.0265003	D
									ILMN_1781841	LRRN2	10446	0.682795	-0.550476	0.0419616	D
									ILMN_1714567	AHNAK	79026	0.682826	-0.550409	0.0419616	D
									ILMN_1757347	C22ORF9	NA	0.682946	-0.550156	0.0226545	D
									ILMN_1763433	TRIM9	114088	0.683392	-0.549215	0.01623	D
									ILMN_1735402	WDR22	NA	0.683794	-0.548366	0.01623	D
									ILMN_1762003	SEC62	7095	0.683954	-0.548028	0.0419616	D
									ILMN_1680624	CREG1	8804	0.684036	-0.547857	0.0419616	D
									ILMN_1733756	COL12A1	1303	0.684065	-0.547794	0.0265003	D
									ILMN_1736730	LRRC16	NA	0.684087	-0.547748	0.01623	D
									ILMN_1677962	GPHN	10243	0.684293	-0.547313	0.01623	D
									ILMN_1669781	PRLR	5618	0.684534	-0.546807	0.01623	D
									ILMN_1679133	SERPINB1	1992	0.68469	-0.546478	0.01623	D
									ILMN_1662848	TXNDC15	79770	0.68483	-0.546183	0.01623	D
									ILMN_1673380	GNG12	55970	0.685196	-0.545412	0.0265003	D
									ILMN_1758679	TMEM168	64418	0.685313	-0.545165	0.0265003	D
									ILMN_2229940	C2ORF7	NA	0.685632	-0.544494	0.01623	D
									ILMN_2381121	UQCC	NA	0.685778	-0.544186	0.0265003	D
									ILMN_1744887	RLN2	6019	0.686162	-0.54338	0.01623	D
									ILMN_2043060	PLCH1	23007	0.686212	-0.543273	0.0419616	D
									ILMN_2061950	RABGAP1	23637	0.686252	-0.543189	0.01623	D
									ILMN_1675398	ALDH1B1	219	0.686296	-0.543098	0.01623	D
									ILMN_1769752	LOC90342	NA	0.686704	-0.542239	0.0265003	D
									ILMN_2340721	TMEM134	80194	0.686778	-0.542085	0.01623	D
									ILMN_2094905	COMMD10	51397	0.68683	-0.541975	0.01623	D
									ILMN_2210934	NR3C2	4306	0.686885	-0.541859	0.01623	D
									ILMN_1755721	FAM63A	NA	0.686964	-0.541694	0.01623	D
									ILMN_1737695	PDGFB	5155	0.687723	-0.540101	0.01623	D
									ILMN_1697916	GYLTL1B	NA	0.688402	-0.538677	0.0419616	D
									ILMN_1666258	AMFR	267	0.688526	-0.538417	0.0265003	D
									ILMN_1687235	HPN	3249	0.688655	-0.538146	0.0226545	D
									ILMN_1676247	JPH2	57158	0.688777	-0.537892	0.01623	D
									ILMN_1666634	FAF1	11124	0.688876	-0.537685	0.01623	D
									ILMN_2351611	UBQLN1	29979	0.689058	-0.537303	0.0265003	D
									ILMN_2196337	C12ORF11	NA	0.689309	-0.536778	0.01623	D
									ILMN_1771261	SYNC1	NA	0.689388	-0.536612	0.0419616	D
									ILMN_2296011	BRWD1	54014	0.689582	-0.536206	0.0419616	D
									ILMN_2391891	MAP2K5	5607	0.689749	-0.535856	0.01623	D
									ILMN_1667213	DFFA	1676	0.689982	-0.53537	0.0419616	D
									ILMN_2134555	KCTD3	51133	0.690387	-0.534523	0.0419616	D
									ILMN_1705753	C3ORF26	NA	0.690527	-0.53423	0.0265003	D
									ILMN_1799024	VAC14	55697	0.690735	-0.533796	0.01623	D
									ILMN_3251120	LOC285407	NA	0.690792	-0.533677	0.0281858	D
									ILMN_1660462	MCOLN2	255231	0.690833	-0.533592	0.0419616	D
									ILMN_1744268	PLEC1	NA	0.690928	-0.533392	0.0265003	D
									ILMN_1805007	SEMA4F	10505	0.691264	-0.532691	0.0265003	D
									ILMN_1808789	MYO5C	55930	0.691345	-0.532522	0.0265003	D
									ILMN_2311497	SNHG3-RCC1	NA	0.691707	-0.531767	0.0419616	D
									ILMN_1697189	PNCK	139728	0.691759	-0.531659	0.0226545	D
									ILMN_1690523	LRRC20	55222	0.691796	-0.531581	0.01623	D
									ILMN_1810725	FAM129A	NA	0.691924	-0.531314	0.01623	D
									ILMN_1769902	HSPBP1	23640	0.692159	-0.530825	0.0265003	D
									ILMN_2393296	GK	2710	0.692311	-0.530508	0.01623	D
									ILMN_2153485	NMNAT3	349565	0.692698	-0.529702	0.01623	D
									ILMN_1729650	PEX7	5191	0.692711	-0.529674	0.01623	D
									ILMN_1773312	INADL	NA	0.692944	-0.529189	0.0226545	D
									ILMN_1695717	RBM41	55285	0.693353	-0.528338	0.01623	D
									ILMN_1676215	DLG2	1740	0.693467	-0.528101	0.0419616	D
									ILMN_2119793	ANKRD34A	284615	0.694714	-0.525509	0.0419616	D
									ILMN_1669033	NCOA1	8648	0.69502	-0.524874	0.0419616	D
									ILMN_1746359	RERG	85004	0.695094	-0.52472	0.0419616	D
									ILMN_3244060	LOC285205	NA	0.695798	-0.523258	0.0265003	D
									ILMN_1760412	SHISA2	387914	0.696083	-0.522668	0.0265003	D
									ILMN_1711227	GMDS	2762	0.696263	-0.522296	0.0265003	D
									ILMN_2288070	FTO	79068	0.696351	-0.522113	0.0419616	D
									ILMN_1664025	PXMP4	11264	0.696431	-0.521947	0.01623	D
									ILMN_1652378	IPO7	10527	0.696647	-0.521501	0.01623	D
									ILMN_1755383	LRRC1	55227	0.696784	-0.521218	0.01623	D
									ILMN_1698491	MBD3	53615	0.697009	-0.520752	0.01623	D
									ILMN_1672320	LOC441907	441907	0.697335	-0.520076	0.0419616	D
									ILMN_1813010	VTA1	51534	0.697388	-0.519966	0.0419616	D
									ILMN_1662578	C1GALT1	56913	0.697629	-0.519468	0.0265003	D
									ILMN_1685312	PSG3	5671	0.697921	-0.518864	0.0402387	D
									ILMN_3252446	LOC100129543	NA	0.698038	-0.518623	0.0419616	D
									ILMN_1720850	BAZ2B	29994	0.69817	-0.518349	0.01623	D
									ILMN_1758750	EARS2	124454	0.698192	-0.518304	0.0265003	D
									ILMN_1731966	LEPR	3953	0.69824	-0.518205	0.01623	D
									ILMN_1758034	ETFDH	2110	0.698311	-0.518057	0.0265003	D
									ILMN_1709237	EPHX2	2053	0.699016	-0.516603	0.0265003	D
									ILMN_1713613	PIAS2	9063	0.699165	-0.516295	0.01623	D
									ILMN_1723467	ITGB1	3688	0.699329	-0.515957	0.0419616	D
									ILMN_1753975	NPTN	27020	0.699424	-0.515761	0.0419616	D
									ILMN_3204686	LOC440459	NA	0.699468	-0.51567	0.0419616	D
									ILMN_1702363	SULF1	23213	0.699825	-0.514934	0.0419616	D
									ILMN_1705876	NAP1L1	4673	0.70012	-0.514327	0.0419616	D
									ILMN_1710209	MFSD6	54842	0.700578	-0.513382	0.0265003	D
									ILMN_1784553	SDC2	6383	0.700886	-0.512749	0.0419616	D
									ILMN_2199313	NPDC1	56654	0.701155	-0.512194	0.01623	D
									ILMN_1765019	SACM1L	22908	0.701168	-0.512168	0.01623	D
									ILMN_1681780	MKX	283078	0.701223	-0.512054	0.0419616	D
									ILMN_1695226	DIAPH3	81624	0.701389	-0.511714	0.0419616	D
									ILMN_1801767	ABHD3	171586	0.701463	-0.511562	0.0419616	D
									ILMN_2118910	TPRKB	51002	0.701775	-0.510919	0.0265003	D
									ILMN_1692760	DPAGT1	1798	0.701803	-0.510862	0.01623	D
									ILMN_2361570	SNX14	57231	0.7019	-0.510663	0.01623	D
									ILMN_3176746	LOC100128191	NA	0.702301	-0.509838	0.01623	D
									ILMN_1745497	C12ORF26	NA	0.702616	-0.509191	0.0265003	D
									ILMN_2352159	BBS9	27241	0.702698	-0.509023	0.0419616	D
									ILMN_1669497	OSBPL10	114884	0.702732	-0.508954	0.0265003	D
									ILMN_1652185	IL4R	3566	0.703055	-0.50829	0.01623	D
									ILMN_2231911	AUH	549	0.703385	-0.507613	0.0419616	D
									ILMN_2222008	KIFC1	3833	0.703394	-0.507594	0.01623	D
									ILMN_1663156	DDX31	64794	0.703548	-0.507279	0.0226545	D
									ILMN_1667839	UBR7	55148	0.703595	-0.507182	0.01623	D
									ILMN_1810852	LAMC1	3915	0.703654	-0.507062	0.0265003	D
									ILMN_3275575	LOC648980	NA	0.703667	-0.507035	0.0265003	D
									ILMN_1685057	SLC22A4	6583	0.703941	-0.506474	0.01623	D
									ILMN_1812666	DNAJC15	29103	0.704064	-0.506222	0.0419616	D
									ILMN_1732066	CKMT1A	548596	0.704112	-0.506123	0.01623	D
									ILMN_3200854	LOC441453	NA	0.704168	-0.506007	0.0265003	D
									ILMN_1782110	ZNF295	NA	0.704211	-0.50592	0.0419616	D
									ILMN_2135527	DEPDC4	120863	0.704219	-0.505903	0.0281858	D
									ILMN_1674160	BIN1	274	0.704435	-0.505461	0.0320887	D
									ILMN_1717366	MDFIC	29969	0.704458	-0.505415	0.0265003	D
									ILMN_1801664	POLR3K	51728	0.704613	-0.505098	0.0419616	D
									ILMN_1718424	MRPS28	28957	0.70489	-0.50453	0.0265003	D
									ILMN_2395240	CHEK2	11200	0.704965	-0.504377	0.01623	D
									ILMN_1687266	TMEM191B	728229	0.704969	-0.504369	0.01623	D
									ILMN_1788462	AMD1	262	0.705147	-0.504005	0.0419616	D
									ILMN_3240594	RNU4ATAC	100151683	0.705204	-0.503888	0.01623	D
									ILMN_1782551	E2F5	1875	0.70532	-0.503649	0.0419616	D
									ILMN_2309615	PSG6	5675	0.70537	-0.503548	0.01623	D
									ILMN_1684271	ACBD6	84320	0.705418	-0.50345	0.0419616	D
									ILMN_1703142	MARCH2	NA	0.705464	-0.503355	0.01623	D
									ILMN_1807501	GINS4	84296	0.705512	-0.503257	0.0265003	D
									ILMN_2202940	CHPT1	56994	0.705523	-0.503234	0.01623	D
									ILMN_1752895	STX8	9482	0.70557	-0.50314	0.01623	D
									ILMN_1718488	MMEL1	79258	0.705593	-0.503092	0.01623	D
									ILMN_1761314	NFS1	9054	0.705942	-0.502379	0.0265003	D
									ILMN_1725235	CDK5RAP2	55755	0.706388	-0.501468	0.0419616	D
									ILMN_2129349	TSSC1	NA	0.706696	-0.500837	0.01623	D
									ILMN_1757639	C3orf57	NA	0.706802	-0.500622	0.01623	D
									ILMN_1700563	ZNF552	79818	0.706821	-0.500583	0.0419616	D
									ILMN_1742705	SLC39A11	201266	0.707039	-0.500138	0.01623	D
									ILMN_3251526	USP13	8975	0.707163	-0.499885	0.0265003	D
									ILMN_1778347	NUDT2	318	0.707325	-0.499556	0.01623	D
									ILMN_1711171	CREB3L4	148327	0.70749	-0.499219	0.0419616	D
									ILMN_1747696	TPM3	7170	0.707814	-0.498559	0.0265003	D
									ILMN_1782085	ATPBD4	NA	0.70788	-0.498424	0.0419616	D
									ILMN_1767579	KRR1	11103	0.70826	-0.49765	0.01623	D
									ILMN_1733318	TEX9	374618	0.708735	-0.496682	0.01623	D
									ILMN_1684755	KAZALD1	81621	0.708834	-0.496481	0.01623	D
									ILMN_1666122	HEG1	57493	0.708868	-0.496411	0.0265003	D
									ILMN_1731699	RAB15	376267	0.708904	-0.496338	0.0265003	D
									ILMN_1768004	PDCD4	27250	0.709148	-0.495842	0.01623	D
									ILMN_2410929	PAPSS2	9060	0.709562	-0.494998	0.01623	D
									ILMN_2164242	UBE2F	140739	0.709892	-0.494329	0.0265003	D
									ILMN_1658902	DEAF1	10522	0.709898	-0.494316	0.0320887	D
									ILMN_1707286	FLJ22662	NA	0.709987	-0.494136	0.01623	D
									ILMN_1668657	FLJ38973	NA	0.710259	-0.493583	0.0419616	D
									ILMN_1653129	CSTF2	1478	0.710305	-0.49349	0.01623	D
									ILMN_2201678	FSTL1	11167	0.710324	-0.493451	0.0265003	D
									ILMN_2364088	GEMIN8	54960	0.710367	-0.493363	0.01623	D
									ILMN_1662556	GALNT10	55568	0.710564	-0.492964	0.0265003	D
									ILMN_1699887	ST14	6768	0.710597	-0.492897	0.0265003	D
									ILMN_1810836	PDE5A	8654	0.710703	-0.492681	0.0226545	D
									ILMN_1700432	ITPKB	3707	0.71076	-0.492566	0.0419616	D
									ILMN_3261439	LOC100128098	NA	0.710976	-0.492127	0.0419616	D
									ILMN_3236428	TMEM170B	100113407	0.711136	-0.491803	0.01623	D
									ILMN_2407824	ATP1B1	481	0.711301	-0.491468	0.0419616	D
									ILMN_1689296	ARMC10	83787	0.711402	-0.491264	0.01623	D
									ILMN_2270491	APBA2BP	NA	0.71158	-0.490903	0.0265003	D
									ILMN_1813938	CHCHD4	131474	0.711759	-0.490538	0.0265003	D
									ILMN_2193980	ABCB6	10058	0.7121	-0.489847	0.0419616	D
									ILMN_1657682	GFM1	85476	0.712275	-0.489493	0.01623	D
									ILMN_1657139	ADAT1	23536	0.712688	-0.488658	0.0419616	D
									ILMN_1702447	IGF2BP2	10644	0.712871	-0.488287	0.01623	D
									ILMN_1691112	PIGN	23556	0.713074	-0.487877	0.01623	D
									ILMN_1684929	TOPBP1	11073	0.713174	-0.487675	0.0419616	D
									ILMN_1716071	PAQR3	152559	0.71321	-0.487601	0.0419616	D
									ILMN_1746368	SELT	NA	0.713283	-0.487453	0.01623	D
									ILMN_3307733	C17ORF42	NA	0.713796	-0.486416	0.0419616	D
									ILMN_1714428	FBXO17	115290	0.713891	-0.486224	0.01623	D
									ILMN_1747183	GXYLT1	283464	0.714117	-0.485768	0.0419616	D
									ILMN_1793360	APITD1	NA	0.714357	-0.485283	0.0265003	D
									ILMN_1652512	C2CD2	25966	0.714425	-0.485146	0.01623	D
									ILMN_1792726	TDRKH	11022	0.714468	-0.485059	0.0189035	D
									ILMN_3244348	SNORA18	677805	0.714602	-0.484787	0.0419616	D
									ILMN_1800530	CENTG2	NA	0.714826	-0.484336	0.01623	D
									ILMN_1661432	NUP43	348995	0.714935	-0.484115	0.0265003	D
									ILMN_3246900	LOC92249	NA	0.715399	-0.483181	0.0419616	D
									ILMN_1683678	SPATS2L	26010	0.715472	-0.483033	0.01623	D
									ILMN_1775182	GSR	2936	0.715514	-0.482949	0.0419616	D
									ILMN_1741398	KIAA0406	NA	0.715769	-0.482434	0.01623	D
									ILMN_1742534	COL4A5	1287	0.715922	-0.482126	0.0265003	D
									ILMN_1727134	KLHDC5	NA	0.715927	-0.482116	0.01623	D
									ILMN_1802642	TOM1L1	10040	0.715927	-0.482115	0.0419616	D
									ILMN_1762224	HPS3	84343	0.716009	-0.481951	0.0265003	D
									ILMN_2058795	PGCP	NA	0.716045	-0.481878	0.0265003	D
									ILMN_1743579	WDR4	10785	0.71616	-0.481645	0.0281858	D
									ILMN_2188722	GLS	2744	0.716268	-0.481429	0.0419616	D
									ILMN_1800721	VPS13A	23230	0.716284	-0.481396	0.0419616	D
									ILMN_2288928	PPP4R4	57718	0.71657	-0.480821	0.0265003	D
									ILMN_1670841	CPNE1	8904	0.71663	-0.4807	0.0265003	D
									ILMN_1781135	STAM2	10254	0.716654	-0.480652	0.0265003	D
									ILMN_1775235	AFF3	3899	0.716846	-0.480264	0.01623	D
									ILMN_2357577	PRKAA1	5562	0.716973	-0.480009	0.0419616	D
									ILMN_2100689	MAP2K4	6416	0.716991	-0.479973	0.0265003	D
									ILMN_1657873	XPO4	64328	0.717296	-0.479359	0.0265003	D
									ILMN_1702759	TMX4	56255	0.717381	-0.479188	0.01623	D
									ILMN_1664186	MFN1	55669	0.71746	-0.479029	0.0265003	D
									ILMN_1672947	CAST	831	0.717576	-0.478797	0.0265003	D
									ILMN_1707326	TASP1	55617	0.717618	-0.478712	0.0419616	D
									ILMN_3233135	FAM178A	NA	0.717698	-0.478552	0.01623	D
									ILMN_1807177	KIAA1797	NA	0.717787	-0.478372	0.01623	D
									ILMN_1671486	HOMER2	9455	0.717969	-0.478007	0.01623	D
									ILMN_3241783	LOC100132485	NA	0.718091	-0.47776	0.01623	D
									ILMN_2288784	CCDC34	91057	0.718296	-0.47735	0.0419616	D
									ILMN_1803423	ARHGEF6	9459	0.718669	-0.476601	0.01623	D
									ILMN_1803686	ADA	100	0.718879	-0.476178	0.0419616	D
									ILMN_1749907	LOC441241	441241	0.719042	-0.475852	0.0419616	D
									ILMN_1724946	SPINT1	6692	0.719076	-0.475783	0.0265003	D
									ILMN_1676893	ADCY3	109	0.719086	-0.475763	0.01623	D
									ILMN_1695731	TUBG1	7283	0.719195	-0.475546	0.01623	D
									ILMN_1742578	MKLN1	4289	0.719246	-0.475442	0.01623	D
									ILMN_2326997	DHPS	1725	0.71972	-0.474493	0.0419616	D
									ILMN_1736751	VPS26B	112936	0.719894	-0.474143	0.0265003	D
									ILMN_1770697	LOC644063	NA	0.720099	-0.473732	0.0419616	D
									ILMN_1672879	MPST	4357	0.720101	-0.47373	0.0265003	D
									ILMN_1700923	ATG4C	84938	0.720246	-0.473438	0.0265003	D
									ILMN_2071826	RNF152	220441	0.720508	-0.472914	0.0226545	D
									ILMN_1798952	KDELR3	11015	0.720611	-0.472707	0.01623	D
									ILMN_3251242	CLMN	79789	0.720726	-0.472477	0.01623	D
									ILMN_1733390	LARP1B	55132	0.720791	-0.472348	0.0419616	D
									ILMN_1757074	GNG10	2790	0.720953	-0.472024	0.01623	D
									ILMN_1656413	ZMPSTE24	10269	0.721108	-0.471712	0.0265003	D
									ILMN_1654118	BCL2L1	598	0.721141	-0.471646	0.0419616	D
									ILMN_1656200	KATNAL2	83473	0.721271	-0.471386	0.0265003	D
									ILMN_2063925	CTNNBL1	56259	0.72133	-0.471268	0.0419616	D
									ILMN_1670263	C1ORF71	NA	0.721352	-0.471224	0.0419616	D
									ILMN_1720303	OSTM1	28962	0.721441	-0.471047	0.01623	D
									ILMN_3236270	ACAP2	23527	0.721571	-0.470787	0.0265003	D
									ILMN_1802456	DCTD	1635	0.721651	-0.470627	0.0265003	D
									ILMN_3201153	LOC727901	NA	0.721652	-0.470625	0.0320887	D
									ILMN_3246214	B3GNT1	NA	0.721739	-0.470452	0.0265003	D
									ILMN_1781281	EPPB9	NA	0.72196	-0.47001	0.0265003	D
									ILMN_2090782	GCSH	2653	0.721995	-0.469939	0.0419616	D
									ILMN_2226324	BRP44L	NA	0.722053	-0.469824	0.01623	D
									ILMN_1711208	CELSR2	1952	0.722087	-0.469756	0.0265003	D
									ILMN_1745772	ASCC3	10973	0.72212	-0.46969	0.0265003	D
									ILMN_2405018	PPP1CB	5500	0.722159	-0.469613	0.0265003	D
									ILMN_1795063	ZADH2	284273	0.722226	-0.469479	0.01623	D
									ILMN_1692191	GNA12	2768	0.722305	-0.46932	0.0265003	D
									ILMN_2190084	VAMP8	8673	0.722328	-0.469274	0.0419616	D
									ILMN_1800796	RPL37	6167	0.722488	-0.468955	0.0320887	D
									ILMN_1748797	GRB2	2885	0.72262	-0.468691	0.0419616	D
									ILMN_1759542	PTGER3	5733	0.722828	-0.468276	0.01623	D
									ILMN_3212284	LOC645693	NA	0.723275	-0.467384	0.0419616	D
									ILMN_2405078	OSBPL8	114882	0.723416	-0.467102	0.0265003	D
									ILMN_1755462	UGCGL1	NA	0.723561	-0.466813	0.0419616	D
									ILMN_1723535	P2RY2	5029	0.723702	-0.466533	0.0368884	D
									ILMN_1873278	LOC731895	NA	0.724268	-0.465404	0.0419616	D
									ILMN_1761260	COBLL1	22837	0.724406	-0.465129	0.01623	D
									ILMN_1742935	ZNF33B	7582	0.724753	-0.464439	0.0419616	D
									ILMN_1706583	DLAT	1737	0.724753	-0.464439	0.01623	D
									ILMN_1750088	VRK2	7444	0.724765	-0.464414	0.0419616	D
									ILMN_1797332	NARS2	79731	0.724974	-0.463999	0.01623	D
									ILMN_1683023	PDGFC	56034	0.725195	-0.463558	0.0419616	D
									ILMN_3267451	GAPDHL6	NA	0.725338	-0.463274	0.0419616	D
									ILMN_2062754	SRA1	10011	0.725495	-0.462963	0.0419616	D
									ILMN_1656165	USP9X	8239	0.72551	-0.462933	0.0419616	D
									ILMN_1792820	NOC2L	26155	0.725545	-0.462863	0.0419616	D
									ILMN_1751351	FLJ90086	NA	0.72575	-0.462455	0.01623	D
									ILMN_2291152	PPP2R2C	5522	0.725773	-0.462411	0.0265003	D
									ILMN_1795905	ZBTB4	57659	0.725902	-0.462154	0.0265003	D
									ILMN_1698001	NCK1	4690	0.725937	-0.462084	0.0265003	D
									ILMN_1669323	BACE2	25825	0.726032	-0.461895	0.0265003	D
									ILMN_2356786	ADD1	118	0.726324	-0.461315	0.0265003	D
									ILMN_1687080	LOC402251	NA	0.726544	-0.460878	0.0265003	D
									ILMN_1651819	GALNT11	63917	0.726652	-0.460663	0.01623	D
									ILMN_3282937	LOC646049	NA	0.726716	-0.460536	0.01623	D
									ILMN_2070044	PPM1K	152926	0.726858	-0.460255	0.01623	D
									ILMN_2226955	VOPP1	81552	0.726988	-0.459996	0.0419616	D
									ILMN_1762993	PIGV	55650	0.727167	-0.459641	0.0419616	D
									ILMN_1687359	MRPS23	51649	0.727356	-0.459266	0.0419616	D
									ILMN_1718924	ETFA	2108	0.727439	-0.459102	0.01623	D
									ILMN_2147435	MAN2A1	4124	0.727441	-0.459098	0.0265003	D
									ILMN_3244461	LRRC16A	NA	0.727523	-0.458935	0.0419616	D
									ILMN_1745374	IFI35	3430	0.727534	-0.458913	0.0419616	D
									ILMN_1666325	ALG10B	144245	0.728184	-0.457625	0.0419616	D
									ILMN_1779423	MRPS14	63931	0.728184	-0.457625	0.0419616	D
									ILMN_1683243	VPS45	11311	0.728358	-0.45728	0.0265003	D
									ILMN_2072178	ECHDC3	79746	0.728373	-0.457251	0.0419616	D
									ILMN_1764355	GAMT	2593	0.728679	-0.456646	0.0419616	D
									ILMN_1750661	FBXW9	84261	0.72878	-0.456445	0.0419616	D
									ILMN_1799128	SLC30A9	10463	0.728863	-0.45628	0.0265003	D
									ILMN_1678692	MPRIP	23164	0.729363	-0.455291	0.01623	D
									ILMN_1662129	RCN2	5955	0.729376	-0.455265	0.0419616	D
									ILMN_1704353	IGSF3	3321	0.729969	-0.454093	0.01623	D
									ILMN_1688780	S100A4	6275	0.72998	-0.454071	0.0419616	D
									ILMN_1669070	MIPEP	4285	0.730057	-0.453919	0.0419616	D
									ILMN_1705116	C6orf85	NA	0.730277	-0.453484	0.0265003	D
									ILMN_1671404	SVIL	6840	0.730558	-0.452929	0.0419616	D
									ILMN_1683471	BDH1	622	0.730573	-0.4529	0.01623	D
									ILMN_1738229	NDRG3	57446	0.730689	-0.45267	0.01623	D
									ILMN_1674411	CKAP2	26586	0.730801	-0.45245	0.0265003	D
									ILMN_1686194	SDCCAG10	NA	0.730951	-0.452154	0.0265003	D
									ILMN_1757693	C17ORF51	NA	0.731171	-0.451719	0.01623	D
									ILMN_1743095	MGC20983	NA	0.731559	-0.450954	0.0265003	D
									ILMN_1726288	TMEM106B	54664	0.731848	-0.450385	0.0419616	D
									ILMN_1749636	DNAJC22	79962	0.73197	-0.450145	0.01623	D
									ILMN_1753143	RHPN2	85415	0.732396	-0.449304	0.01623	D
									ILMN_1699737	TRAP1	10131	0.732606	-0.448891	0.0419616	D
									ILMN_1809344	BTBD10	84280	0.732706	-0.448694	0.01623	D
									ILMN_2096604	NIP30	NA	0.732709	-0.448688	0.01623	D
									ILMN_1663519	SLC24A3	57419	0.732771	-0.448566	0.01623	D
									ILMN_1711608	SSBP2	23635	0.732974	-0.448166	0.0419616	D
									ILMN_1696870	TGFBRAP1	9392	0.733107	-0.447904	0.0419616	D
									ILMN_1751452	NDFIP1	80762	0.733187	-0.447746	0.0265003	D
									ILMN_1811014	PGR	5241	0.733188	-0.447744	0.0419616	D
									ILMN_2367215	PRCP	5547	0.733299	-0.447526	0.01623	D
									ILMN_1665260	FLJ25996	NA	0.733528	-0.447076	0.01623	D
									ILMN_1677829	SLC9A6	10479	0.733673	-0.446792	0.0419616	D
									ILMN_1723709	C9ORF116	NA	0.733714	-0.44671	0.0265003	D
									ILMN_1700168	LARS2	23395	0.733962	-0.446224	0.0265003	D
									ILMN_2403247	CMTM7	112616	0.734208	-0.44574	0.01623	D
									ILMN_1694752	LOC727726	NA	0.734278	-0.445601	0.01623	D
									ILMN_1775944	ABI2	10152	0.734281	-0.445595	0.0265003	D
									ILMN_2199284	ANAPC7	51434	0.734319	-0.44552	0.0265003	D
									ILMN_1720059	HMBOX1	79618	0.734407	-0.445349	0.01623	D
									ILMN_1694840	MATN2	4147	0.734483	-0.445199	0.0419616	D
									ILMN_1668605	NAAA	27163	0.734551	-0.445065	0.01623	D
									ILMN_1704531	PTGR1	22949	0.734588	-0.444993	0.01623	D
									ILMN_3240220	RNU1F1	NA	0.73466	-0.444851	0.0419616	D
									ILMN_1793859	ALDH2	217	0.735092	-0.444004	0.01623	D
									ILMN_1740170	CHCHD10	400916	0.735335	-0.443526	0.01623	D
									ILMN_1779032	LOC642502	642502	0.735382	-0.443434	0.01623	D
									ILMN_1681972	TMEM69	51249	0.735389	-0.443421	0.01623	D
									ILMN_1737651	CDC40	51362	0.735708	-0.442794	0.0265003	D
									ILMN_1681340	C1ORF41	NA	0.736025	-0.442172	0.01623	D
									ILMN_1343295	GAPDH	2597	0.73612	-0.441987	0.0265003	D
									ILMN_1726554	IREB2	3658	0.736472	-0.441298	0.01623	D
									ILMN_2046470	DAAM1	23002	0.736511	-0.441221	0.0419616	D
									ILMN_1811933	SHMT1	6470	0.736688	-0.440875	0.01623	D
									ILMN_1732612	SHB	6461	0.736707	-0.440838	0.0419616	D
									ILMN_1796962	PPP3R1	5534	0.736913	-0.440433	0.01623	D
									ILMN_1795822	DIS3L	115752	0.736948	-0.440366	0.01623	D
									ILMN_1696568	ATP2C1	27032	0.737093	-0.440081	0.0265003	D
									ILMN_3181411	ATL1	51062	0.737155	-0.439961	0.01623	D
									ILMN_1708341	PDZK1	5174	0.73718	-0.439911	0.01623	D
									ILMN_2041222	FLJ40504	NA	0.737243	-0.439788	0.01623	D
									ILMN_1656676	ZYG11B	79699	0.737255	-0.439765	0.0265003	D
									ILMN_1699606	ASB3	51130	0.737283	-0.439709	0.0265003	D
									ILMN_2184262	OAS3	4940	0.73731	-0.439656	0.0419616	D
									ILMN_2377240	AKTIP	64400	0.737406	-0.439469	0.0265003	D
									ILMN_1684336	VEPH1	79674	0.737709	-0.438877	0.01623	D
									ILMN_1810729	UBL3	5412	0.738119	-0.438074	0.01623	D
									ILMN_2130525	TSPAN13	27075	0.738197	-0.437922	0.0419616	D
									ILMN_1688180	ASPSCR1	79058	0.738253	-0.437812	0.01623	D
									ILMN_3239284	B9D1	27077	0.738263	-0.437793	0.01623	D
									ILMN_1656486	DNAJC10	54431	0.738541	-0.437251	0.01623	D
									ILMN_1779258	LOC644774	NA	0.738663	-0.437012	0.01623	D
									ILMN_1668498	CWF19L2	143884	0.738703	-0.436933	0.0419616	D
									ILMN_1715616	PPIL5	NA	0.738903	-0.436543	0.01623	D
									ILMN_1653429	SLC35A3	23443	0.738997	-0.436359	0.0419616	D
									ILMN_1737312	SLC25A17	10478	0.739397	-0.435579	0.0419616	D
									ILMN_1704196	DSG2	1829	0.739429	-0.435517	0.0419616	D
									ILMN_2348146	ERCC8	1161	0.739798	-0.434797	0.0265003	D
									ILMN_2332250	ACOT7	11332	0.739844	-0.434708	0.01623	D
									ILMN_1736939	UGCG	7357	0.740018	-0.434367	0.01623	D
									ILMN_1743130	PTGFRN	5738	0.740115	-0.434179	0.0265003	D
									ILMN_1777058	HIATL1	NA	0.740118	-0.434173	0.0265003	D
									ILMN_1714956	PLA2G12A	81579	0.740264	-0.433889	0.0265003	D
									ILMN_1746465	FJX1	24147	0.740677	-0.433083	0.0265003	D
									ILMN_2363058	PAOX	196743	0.740785	-0.432873	0.0265003	D
									ILMN_2126957	NOMO1	23420	0.74106	-0.432337	0.01623	D
									ILMN_1816781	NA	NA	0.741436	-0.431606	0.01623	D
									ILMN_3224926	RBM47	54502	0.74161	-0.431267	0.0419616	D
									ILMN_3263702	LOC100128881	NA	0.741801	-0.430895	0.01623	D
									ILMN_1703906	HJURP	55355	0.741837	-0.430825	0.0419616	D
									ILMN_1782944	GPR37L1	9283	0.741893	-0.430718	0.01623	D
									ILMN_1802894	VKORC1L1	154807	0.741896	-0.430711	0.01623	D
									ILMN_1715886	CNOT7	29883	0.741963	-0.43058	0.01623	D
									ILMN_1703074	CPD	1362	0.742177	-0.430165	0.0419616	D
									ILMN_1685430	TRIM3	10612	0.74233	-0.429868	0.0265003	D
									ILMN_1789999	SLC30A7	148867	0.7426	-0.429342	0.0265003	D
									ILMN_1780898	PRKCH	5583	0.742636	-0.429273	0.0265003	D
									ILMN_1815124	LOC645317	NA	0.742682	-0.429184	0.0265003	D
									ILMN_2082324	SLC36A4	120103	0.742695	-0.429158	0.01623	D
									ILMN_1655884	ATP2A2	488	0.742843	-0.42887	0.01623	D
									ILMN_1811327	MRPL27	51264	0.742859	-0.42884	0.01623	D
									ILMN_1711766	SKP1A	NA	0.742893	-0.428774	0.0265003	D
									ILMN_2375386	RNPS1	10921	0.74315	-0.428274	0.0419616	D
									ILMN_1751444	NCAPG	64151	0.743579	-0.427441	0.0419616	D
									ILMN_2169856	C12ORF43	NA	0.743656	-0.427293	0.0419616	D
									ILMN_1760635	RAD51C	5889	0.743662	-0.427282	0.01623	D
									ILMN_1730622	EVL	51466	0.743965	-0.426692	0.0265003	D
									ILMN_2056479	TXNL2	NA	0.744022	-0.426582	0.01623	D
									ILMN_1673880	EFEMP1	2202	0.744059	-0.426511	0.01623	D
									ILMN_1696546	FZD1	8321	0.744178	-0.426281	0.0419616	D
									ILMN_1658639	SLC46A3	283537	0.744208	-0.426222	0.0419616	D
									ILMN_1733675	MPP1	4354	0.744251	-0.42614	0.01623	D
									ILMN_1777727	KANK1	23189	0.744343	-0.425961	0.0419616	D
									ILMN_2320349	BACE1	23621	0.744461	-0.425731	0.0419616	D
									ILMN_1745499	UXT	8409	0.744735	-0.425201	0.0419616	D
									ILMN_2225698	NDUFA10	4705	0.744754	-0.425165	0.01623	D
									ILMN_2091792	ENTPD6	955	0.74482	-0.425036	0.0419616	D
									ILMN_1800837	CFDP1	10428	0.744956	-0.424772	0.0419616	D
									ILMN_1750800	ACO1	48	0.744986	-0.424716	0.01623	D
									ILMN_1783846	RAPH1	65059	0.745084	-0.424524	0.01623	D
									ILMN_1795429	VCL	7414	0.745167	-0.424364	0.01623	D
									ILMN_1784256	HDGFRP3	NA	0.745373	-0.423966	0.0265003	D
									ILMN_2054607	CYP4V2	285440	0.745415	-0.423884	0.0419616	D
									ILMN_3291344	LOC202227	NA	0.745621	-0.423487	0.0419616	D
									ILMN_1708936	EXOSC3	51010	0.745624	-0.42348	0.0419616	D
									ILMN_3231820	SIVA1	10572	0.745832	-0.423077	0.01623	D
									ILMN_1688234	ASS1	445	0.745877	-0.422991	0.01623	D
									ILMN_3307729	CXXC5	51523	0.745999	-0.422755	0.0265003	D
									ILMN_1662483	SMA5	NA	0.746093	-0.422573	0.0265003	D
									ILMN_1663220	MRPL22	29093	0.746107	-0.422546	0.01623	D
									ILMN_1799890	ZFYVE20	NA	0.746172	-0.422419	0.01623	D
									ILMN_1721901	CTNNAL1	8727	0.746326	-0.422121	0.0419616	D
									ILMN_1724293	KDELR2	11014	0.746358	-0.42206	0.0265003	D
									ILMN_3249546	RASA4P	NA	0.746441	-0.4219	0.0419616	D
									ILMN_2323508	C9orf58	NA	0.746503	-0.42178	0.0419616	D
									ILMN_1652549	DTNA	1837	0.747018	-0.420786	0.0265003	D
									ILMN_2112524	RNF149	284996	0.747019	-0.420784	0.0265003	D
									ILMN_2323087	RBPMS	11030	0.747212	-0.42041	0.0419616	D
									ILMN_1670304	LOC727866	NA	0.74732	-0.420202	0.0265003	D
									ILMN_1790461	C6ORF125	NA	0.747321	-0.4202	0.0419616	D
									ILMN_3243142	KAT2B	8850	0.747485	-0.419883	0.01623	D
									ILMN_1721605	SMYD2	56950	0.747569	-0.419721	0.0419616	D
									ILMN_1721623	APOO	79135	0.747868	-0.419144	0.01623	D
									ILMN_1705049	TMEM67	91147	0.747997	-0.418896	0.01623	D
									ILMN_1664175	VAMP4	8674	0.748304	-0.418303	0.01623	D
									ILMN_1707475	UBE2E2	7325	0.748336	-0.418243	0.01623	D
									ILMN_1813275	DUSP22	56940	0.748346	-0.418222	0.01623	D
									ILMN_2346460	NARG2	NA	0.748385	-0.418148	0.0419616	D
									ILMN_1733374	LOC642197	NA	0.748478	-0.417969	0.01623	D
									ILMN_2373062	RHBDF2	79651	0.748703	-0.417535	0.0419616	D
									ILMN_1697597	KIAA0494	NA	0.748764	-0.417417	0.0265003	D
									ILMN_2338268	ABHD11	83451	0.748911	-0.417135	0.0419616	D
									ILMN_2313672	IL1RL1	9173	0.748935	-0.417088	0.0226545	D
									ILMN_1764362	LYAR	55646	0.749001	-0.416961	0.01623	D
									ILMN_2045729	WDR12	55759	0.749028	-0.416909	0.01623	D
									ILMN_2372082	SNRPN	6638	0.749124	-0.416723	0.0419616	D
									ILMN_1815924	NUP107	57122	0.749159	-0.416656	0.0419616	D
									ILMN_2336094	ODZ3	NA	0.749207	-0.416563	0.0419616	D
									ILMN_1735155	GLB1	2720	0.749275	-0.416434	0.01623	D
									ILMN_1713744	C14ORF132	NA	0.749464	-0.416069	0.01623	D
									ILMN_1680435	NPEPPS	9520	0.749509	-0.415982	0.01623	D
									ILMN_1799860	PIGM	93183	0.749632	-0.415745	0.0419616	D
									ILMN_1731374	CPE	1363	0.749634	-0.415741	0.01623	D
									ILMN_2313158	MBNL1	4154	0.749742	-0.415534	0.0419616	D
									ILMN_1717877	IVNS1ABP	10625	0.749865	-0.415298	0.0419616	D
									ILMN_1809003	CBR1	873	0.749884	-0.41526	0.01623	D
									ILMN_1809139	AHCTF1	25909	0.749899	-0.415232	0.0419616	D
									ILMN_1678612	ANXA6	309	0.749902	-0.415226	0.01623	D
									ILMN_1701681	SEC11C	90701	0.750275	-0.414508	0.0419616	D
									ILMN_2041293	SQLE	6713	0.750294	-0.414473	0.0265003	D
									ILMN_1721977	ARD1A	NA	0.750304	-0.414452	0.01623	D
									ILMN_1682919	PAFAH2	5051	0.750319	-0.414425	0.0419616	D
									ILMN_2052163	YIPF1	54432	0.75044	-0.414192	0.01623	D
									ILMN_2408001	RFWD2	NA	0.750676	-0.413738	0.01623	D
									ILMN_1713143	MRPL3	11222	0.750698	-0.413696	0.0419616	D
									ILMN_1791306	C9ORF103	NA	0.750699	-0.413694	0.0265003	D
									ILMN_1664798	GRHPR	9380	0.750776	-0.413547	0.0265003	D
									ILMN_1814600	DEPDC1B	55789	0.75103	-0.413057	0.01623	D
									ILMN_2206098	ATG10	83734	0.75105	-0.41302	0.0265003	D
									ILMN_1797964	ARL6IP6	151188	0.751093	-0.412936	0.0419616	D
									ILMN_1703471	ATF6	22926	0.75117	-0.412789	0.01623	D
									ILMN_1662331	PDSS2	57107	0.751198	-0.412735	0.0419616	D
									ILMN_1796063	TRIM44	54765	0.751502	-0.412152	0.01623	D
									ILMN_2391861	GSTM1	2944	0.751505	-0.412146	0.0265003	D
									ILMN_1712088	CLYBL	171425	0.751545	-0.412068	0.0419616	D
									ILMN_1810055	ITFG3	NA	0.751586	-0.41199	0.0419616	D
									ILMN_1670901	COX10	1352	0.751647	-0.411874	0.0265003	D
									ILMN_1655565	UGT3A2	167127	0.751702	-0.411767	0.0265003	D
									ILMN_1753719	GTF2A2	2958	0.751911	-0.411366	0.0265003	D
									ILMN_1671800	LOC643911	NA	0.751959	-0.411274	0.0419616	D
									ILMN_1701434	RAP1B	5908	0.752137	-0.410932	0.0419616	D
									ILMN_1705114	NUMB	8650	0.752139	-0.410928	0.0419616	D
									ILMN_1781013	CPN2	1370	0.752241	-0.410733	0.0265003	D
									ILMN_1688953	ARHGAP19	84986	0.752264	-0.410689	0.01623	D
									ILMN_1769694	ACCN2	NA	0.752388	-0.410452	0.01623	D
									ILMN_2122952	CISD1	55847	0.752714	-0.409827	0.0265003	D
									ILMN_2234970	SLC39A3	29985	0.752735	-0.409786	0.01623	D
									ILMN_1765860	DOCK11	139818	0.752777	-0.409705	0.0419616	D
									ILMN_1768505	IL13RA1	3597	0.752793	-0.409675	0.0265003	D
									ILMN_2391551	C13ORF23	NA	0.75281	-0.409642	0.0419616	D
									ILMN_1813594	PREI3	NA	0.752907	-0.409457	0.0419616	D
									ILMN_1782558	XG	7499	0.753285	-0.408732	0.01623	D
									ILMN_1667711	HRASLS3	NA	0.753346	-0.408615	0.0419616	D
									ILMN_2249288	TIPRL	261726	0.753346	-0.408615	0.01623	D
									ILMN_1805519	CD24	100133941	0.753512	-0.408298	0.0419616	D
									ILMN_1728907	SCAMP1	9522	0.753735	-0.407871	0.0265003	D
									ILMN_3260618	LOC100128086	100128086	0.753747	-0.407848	0.01623	D
									ILMN_1758941	REEP5	7905	0.754001	-0.407362	0.01623	D
									ILMN_1758146	SIRPA	140885	0.754346	-0.406701	0.0419616	D
									ILMN_1716086	WDR33	55339	0.754387	-0.406624	0.0419616	D
									ILMN_1764850	HPCAL1	3241	0.754586	-0.406242	0.01623	D
									ILMN_1755221	LMAN2L	81562	0.754918	-0.405608	0.0265003	D
									ILMN_1810810	EEF1A1	1915	0.755345	-0.404792	0.0265003	D
									ILMN_1706958	PCNA	5111	0.755477	-0.40454	0.0265003	D
									ILMN_1760683	SFRS9	NA	0.755897	-0.403738	0.0419616	D
									ILMN_1728662	ALDH3B1	221	0.75634	-0.402894	0.0419616	D
									ILMN_3310113	MIR586	693171	0.756511	-0.402568	0.0265003	D
									ILMN_1737396	PSMD14	10213	0.756518	-0.402553	0.01623	D
									ILMN_1662417	LRPPRC	10128	0.75654	-0.402512	0.01623	D
									ILMN_1774823	RPL34	6164	0.756588	-0.402421	0.0419616	D
									ILMN_2069593	SFRS2IP	NA	0.756672	-0.40226	0.0265003	D
									ILMN_1741300	ZNF407	55628	0.756755	-0.402101	0.0265003	D
									ILMN_1783675	ASB8	140461	0.757239	-0.401178	0.01623	D
									ILMN_1705861	AP1M2	10053	0.75745	-0.400778	0.0265003	D
									ILMN_1814213	PQLC3	NA	0.757545	-0.400596	0.01623	D
									ILMN_2299450	P2RX2	22953	0.757623	-0.400448	0.0419616	D
									ILMN_1716547	NAGK	55577	0.757721	-0.400262	0.0419616	D
									ILMN_1778836	SFRS7	NA	0.757775	-0.400158	0.0419616	D
									ILMN_3235188	LOC100131187	NA	0.757857	-0.400002	0.0419616	D
									ILMN_2389151	UGP2	7360	0.758409	-0.398952	0.0419616	D
									ILMN_1681798	SEPT6	NA	0.758531	-0.39872	0.0419616	D
									ILMN_1686957	SS18	6760	0.758568	-0.39865	0.0419616	D
									ILMN_2312709	LCMT1	51451	0.758598	-0.398592	0.0265003	D
									ILMN_3243302	C8ORF30B	NA	0.758655	-0.398485	0.0419616	D
									ILMN_2261784	CCNY	219771	0.758857	-0.398099	0.01623	D
									ILMN_2081335	C7ORF44	NA	0.758966	-0.397894	0.01623	D
									ILMN_1789283	PPP2R5C	5527	0.759053	-0.397728	0.01623	D
									ILMN_1667429	SLC25A20	788	0.7592	-0.397448	0.0265003	D
									ILMN_1691760	FAM45A	NA	0.759223	-0.397404	0.0419616	D
									ILMN_2056002	LOC723972	NA	0.759284	-0.397289	0.0265003	D
									ILMN_2313821	AIFM1	9131	0.759388	-0.397091	0.0419616	D
									ILMN_1701441	LPAR1	1902	0.759551	-0.396782	0.0419616	D
									ILMN_1806387	LOC340598	NA	0.75956	-0.396765	0.0265003	D
									ILMN_2226751	ZC3HAV1L	92092	0.759873	-0.396169	0.0419616	D
									ILMN_1695432	TPST2	8459	0.760269	-0.395419	0.01623	D
									ILMN_1698677	C4ORF27	NA	0.760304	-0.395351	0.0419616	D
									ILMN_2329165	MYO1C	4641	0.760648	-0.394699	0.0419616	D
									ILMN_1742432	COBRA1	NA	0.760879	-0.394261	0.01623	D
									ILMN_1724826	DNM1L	10059	0.760984	-0.394061	0.0419616	D
									ILMN_3242176	UBR3	130507	0.761046	-0.393944	0.0419616	D
									ILMN_1753010	PET112L	NA	0.761089	-0.393862	0.0265003	D
									ILMN_2105573	CCL3L3	414062	0.761101	-0.39384	0.0419616	D
									ILMN_1694759	C19ORF42	NA	0.761103	-0.393836	0.0419616	D
									ILMN_1768772	DEGS2	123099	0.761367	-0.393336	0.0419616	D
									ILMN_1727332	ATPIF1	NA	0.761466	-0.393149	0.0265003	D
									ILMN_1746676	CLDN8	9073	0.761493	-0.393097	0.0419616	D
									ILMN_3238777	LOC728612	NA	0.761829	-0.392462	0.01623	D
									ILMN_2223350	C13orf1	NA	0.761913	-0.392301	0.0419616	D
									ILMN_1773576	CPNE3	8895	0.762228	-0.391705	0.0419616	D
									ILMN_1806867	PPM1G	5496	0.762239	-0.391684	0.0419616	D
									ILMN_1746241	SDHC	6391	0.76246	-0.391266	0.0265003	D
									ILMN_2051232	SDHA	6389	0.762486	-0.391218	0.01623	D
									ILMN_3187508	KRT18P13	392371	0.762543	-0.39111	0.0265003	D
									ILMN_1764090	AK3L1	NA	0.762566	-0.391067	0.0265003	D
									ILMN_1790577	SLC35F2	54733	0.762743	-0.390731	0.0265003	D
									ILMN_1762990	KIAA0141	NA	0.762781	-0.390659	0.0265003	D
									ILMN_1712577	FAM174A	345757	0.762786	-0.39065	0.01623	D
									ILMN_3240116	SNORA59A	677885	0.762885	-0.390463	0.01623	D
									ILMN_3247064	SNRNP40	9410	0.762942	-0.390354	0.01623	D
									ILMN_1814333	SERPINI1	5274	0.763253	-0.389766	0.0419616	D
									ILMN_3182885	LOC100130542	NA	0.763269	-0.389736	0.0368884	D
									ILMN_2105983	XRCC5	7520	0.763271	-0.389733	0.0265003	D
									ILMN_1802973	ANAPC4	29945	0.763294	-0.38969	0.0265003	D
									ILMN_1803124	BIRC5	332	0.763455	-0.389384	0.0419616	D
									ILMN_3208140	LOC100134189	NA	0.763471	-0.389355	0.01623	D
									ILMN_1785161	CHCHD6	84303	0.763479	-0.38934	0.01623	D
									ILMN_2363065	RTN3	10313	0.763656	-0.389005	0.01623	D
									ILMN_1717909	TMEM16A	NA	0.764182	-0.388012	0.0419616	D
									ILMN_1691946	FAM173B	NA	0.76429	-0.387807	0.01623	D
									ILMN_2394242	AMMECR1	9949	0.764307	-0.387775	0.0419616	D
									ILMN_1805952	SYT15	83849	0.764429	-0.387546	0.01623	D
									ILMN_1806754	GLDC	2731	0.764483	-0.387443	0.01623	D
									ILMN_1802519	VPS36	51028	0.764483	-0.387443	0.0419616	D
									ILMN_2312194	CYB5A	1528	0.764487	-0.387435	0.0265003	D
									ILMN_1715069	TANK	10010	0.764615	-0.387194	0.0419616	D
									ILMN_1683755	SOX13	9580	0.764729	-0.386979	0.0265003	D
									ILMN_1718607	TSPAN4	7106	0.764942	-0.386578	0.01623	D
									ILMN_1793146	CCDC25	55246	0.765121	-0.386241	0.01623	D
									ILMN_1707551	AFMID	125061	0.765157	-0.386172	0.01623	D
									ILMN_1710216	AVEN	57099	0.765207	-0.386077	0.01623	D
									ILMN_1691572	TST	7263	0.765262	-0.385974	0.0265003	D
									ILMN_1669032	PPIC	5480	0.765312	-0.38588	0.01623	D
									ILMN_1667670	SLC25A15	10166	0.765321	-0.385862	0.01623	D
									ILMN_3241758	POTEF	728378	0.765637	-0.385268	0.0265003	D
									ILMN_1800130	ETNK2	55224	0.765777	-0.385003	0.01623	D
									ILMN_1660727	ENPP5	59084	0.766031	-0.384526	0.0419616	D
									ILMN_1797925	MOCS2	4338	0.766196	-0.384215	0.0419616	D
									ILMN_2363658	PXDN	7837	0.766328	-0.383966	0.0265003	D
									ILMN_3193903	LOC100128695	NA	0.766347	-0.383931	0.0419616	D
									ILMN_2062468	IGFBP7	3490	0.766439	-0.383757	0.01623	D
									ILMN_1737847	RMND5B	64777	0.766587	-0.383479	0.0419616	D
									ILMN_1780659	NUDT6	11162	0.766592	-0.38347	0.01623	D
									ILMN_3228700	POLD2	5425	0.766815	-0.38305	0.0419616	D
									ILMN_1713966	MRPL52	122704	0.766833	-0.383016	0.0419616	D
									ILMN_1671207	IARS2	55699	0.766894	-0.382902	0.0265003	D
									ILMN_1778803	ZFAND6	54469	0.766908	-0.382874	0.0419616	D
									ILMN_1685156	ADCY6	112	0.767132	-0.382453	0.01623	D
									ILMN_1764266	CKMT2	1160	0.767551	-0.381665	0.0265003	D
									ILMN_1689029	WDR7	23335	0.767621	-0.381535	0.0419616	D
									ILMN_1751400	SKAP1	8631	0.767758	-0.381276	0.01623	D
									ILMN_1691861	FASTK	10922	0.76779	-0.381217	0.01623	D
									ILMN_1687589	CPT1A	1374	0.7678	-0.381198	0.0419616	D
									ILMN_1775269	EID1	23741	0.76796	-0.380897	0.0265003	D
									ILMN_2242403	DGUOK	1716	0.768055	-0.380719	0.01623	D
									ILMN_2415179	CLSTN1	22883	0.768095	-0.380644	0.0265003	D
									ILMN_1770020	PPIL3	53938	0.768232	-0.380385	0.01623	D
									ILMN_2199389	VIPR1	7433	0.768532	-0.379824	0.0419616	D
									ILMN_2408450	UBE1DC1	NA	0.768535	-0.379817	0.0265003	D
									ILMN_1696046	SIVA	NA	0.768721	-0.379468	0.0419616	D
									ILMN_1726729	C2ORF76	NA	0.768824	-0.379275	0.0419616	D
									ILMN_1795930	PTGER4	5734	0.768829	-0.379265	0.0419616	D
									ILMN_1661492	ARRDC1	92714	0.769075	-0.378805	0.0419616	D
									ILMN_1770048	DPH5	51611	0.769177	-0.378612	0.0419616	D
									ILMN_1708605	LOC652481	NA	0.769181	-0.378605	0.01623	D
									ILMN_2138435	MRPS27	23107	0.769397	-0.378199	0.01623	D
									ILMN_1741003	ANXA5	308	0.769494	-0.378018	0.0419616	D
									ILMN_1714850	HSGT1	NA	0.769678	-0.377674	0.0419616	D
									ILMN_1724139	TMEM123	114908	0.769736	-0.377564	0.0419616	D
									ILMN_2408430	LARGE	NA	0.769925	-0.377209	0.01623	D
									ILMN_1721989	ATP5F1	NA	0.769955	-0.377154	0.01623	D
									ILMN_1655418	CAPNS1	826	0.770065	-0.376949	0.0265003	D
									ILMN_1730355	FGFR4	2264	0.77013	-0.376826	0.0320887	D
									ILMN_1804150	HIBADH	11112	0.770219	-0.376659	0.01623	D
									ILMN_1691291	PIGS	94005	0.770278	-0.37655	0.01623	D
									ILMN_2381397	HSPD1	3329	0.770485	-0.376162	0.0419616	D
									ILMN_1683277	KIAA0319L	79932	0.770504	-0.376126	0.0265003	D
									ILMN_1723662	ABHD2	11057	0.770904	-0.375377	0.0265003	D
									ILMN_1713756	GLUD1	2746	0.770958	-0.375275	0.0265003	D
									ILMN_1781980	CFC1B	653275	0.771161	-0.374895	0.0281858	D
									ILMN_1799106	MOSC1	NA	0.771166	-0.374886	0.0419616	D
									ILMN_1778543	LOC653874	NA	0.771304	-0.374628	0.0265003	D
									ILMN_1697546	BRCC3	79184	0.771381	-0.374485	0.0265003	D
									ILMN_3286312	LOC642458	NA	0.771625	-0.374029	0.0419616	D
									ILMN_3237774	ACER3	55331	0.771774	-0.37375	0.0226545	D
									ILMN_1796669	PSEN1	5663	0.771819	-0.373665	0.01623	D
									ILMN_1701361	C9ORF150	NA	0.771972	-0.37338	0.0265003	D
									ILMN_1763491	CKMT1B	1159	0.772157	-0.373034	0.0265003	D
									ILMN_1754738	AP1M1	8907	0.772397	-0.372586	0.01623	D
									ILMN_1740724	LOC392221	NA	0.772477	-0.372437	0.0265003	D
									ILMN_2403911	ARFIP1	27236	0.772523	-0.372351	0.0419616	D
									ILMN_1693310	ITFG1	81533	0.772655	-0.372104	0.01623	D
									ILMN_1792110	C10ORF76	NA	0.772731	-0.371962	0.0265003	D
									ILMN_2383349	STEAP3	55240	0.772834	-0.37177	0.01623	D
									ILMN_1681008	CGRRF1	10668	0.77293	-0.371591	0.0265003	D
									ILMN_1655930	ELL2	22936	0.772961	-0.371532	0.0419616	D
									ILMN_1753890	TMEM97	27346	0.773019	-0.371424	0.0265003	D
									ILMN_1811615	COPA	1314	0.773114	-0.371248	0.01623	D
									ILMN_1660691	RAB31	11031	0.773312	-0.370877	0.01623	D
									ILMN_1809488	SPCS2	9789	0.77337	-0.370769	0.01623	D
									ILMN_1673673	PBK	55872	0.773465	-0.370592	0.01623	D
									ILMN_1694057	EIF3K	27335	0.773488	-0.370548	0.01623	D
									ILMN_1722066	ARMC1	55156	0.773499	-0.370529	0.0419616	D
									ILMN_1682930	SIPA1	6494	0.773563	-0.37041	0.01623	D
									ILMN_2189406	C15ORF38	NA	0.773632	-0.370281	0.0265003	D
									ILMN_2232166	CCDC90B	60492	0.773803	-0.369962	0.0265003	D
									ILMN_2292863	RASA1	5921	0.773912	-0.369759	0.0419616	D
									ILMN_1698225	MYO5A	4644	0.774088	-0.369431	0.01623	D
									ILMN_2384807	LRRCC1	85444	0.774094	-0.36942	0.01623	D
									ILMN_1734231	DDOST	1650	0.774209	-0.369204	0.0419616	D
									ILMN_1661717	TFDP1	7027	0.774283	-0.369067	0.0419616	D
									ILMN_1748923	SMC2	10592	0.774435	-0.368783	0.0265003	D
									ILMN_1797154	AZGP1	563	0.774471	-0.368716	0.0419616	D
									ILMN_1683470	TMEM139	135932	0.774483	-0.368695	0.0265003	D
									ILMN_1692790	ITGB3BP	23421	0.774528	-0.36861	0.0265003	D
									ILMN_1804248	FDPS	2224	0.774564	-0.368544	0.0419616	D
									ILMN_1731612	UCHL5	51377	0.774723	-0.368247	0.01623	D
									ILMN_1691237	CAP2	10486	0.774779	-0.368144	0.0265003	D
									ILMN_2181191	TPI1	7167	0.774809	-0.368088	0.0419616	D
									ILMN_1698191	SCML2	10389	0.774817	-0.368073	0.0419616	D
									ILMN_1749409	LOC649864	NA	0.774829	-0.368049	0.01623	D
									ILMN_1790819	LOC728556	NA	0.774833	-0.368044	0.01623	D
									ILMN_1775036	SEC22A	26984	0.774926	-0.36787	0.0265003	D
									ILMN_1768394	ARPC5	10092	0.775084	-0.367576	0.0265003	D
									ILMN_1665280	SPCS1	28972	0.775208	-0.367345	0.0265003	D
									ILMN_1719661	SEPX1	NA	0.775264	-0.36724	0.01623	D
									ILMN_2153373	LRBA	987	0.775347	-0.367085	0.0419616	D
									ILMN_1745154	PARD6B	84612	0.775588	-0.366638	0.0419616	D
									ILMN_2366490	ZNF706	51123	0.775701	-0.366427	0.01623	D
									ILMN_2217601	ANXA9	8416	0.775731	-0.366372	0.0419616	D
									ILMN_1669832	TCF12	6938	0.775795	-0.366252	0.01623	D
									ILMN_1793732	FARS2	10667	0.775939	-0.365985	0.0265003	D
									ILMN_2323418	KRIT1	889	0.776001	-0.365869	0.0419616	D
									ILMN_3265895	HNRNPR	10236	0.77627	-0.365369	0.0419616	D
									ILMN_1752526	RNF144B	255488	0.776587	-0.36478	0.01623	D
									ILMN_1717793	C19orf33	64073	0.776716	-0.364541	0.01623	D
									ILMN_1772817	MAP3K7IP1	NA	0.776795	-0.364395	0.0419616	D
									ILMN_1661306	LOC643433	NA	0.77697	-0.364069	0.0265003	D
									ILMN_1738677	PRPF8	10594	0.777006	-0.364003	0.0419616	D
									ILMN_1716524	RAB7A	7879	0.777059	-0.363903	0.0265003	D
									ILMN_1733311	PIGB	9488	0.777204	-0.363635	0.01623	D
									ILMN_2192693	EIF3M	10480	0.777651	-0.362805	0.0265003	D
									ILMN_3284084	LOC392522	NA	0.777664	-0.36278	0.0419616	D
									ILMN_1665730	ABCB10	23456	0.77769	-0.362734	0.0419616	D
									ILMN_1782439	CNN3	1266	0.777757	-0.362608	0.0419616	D
									ILMN_1691181	TMX1	81542	0.777836	-0.362463	0.01623	D
									ILMN_1670895	ZNF207	7756	0.777838	-0.362458	0.0419616	D
									ILMN_3209973	LOC646044	646044	0.777867	-0.362405	0.0419616	D
									ILMN_2394571	FBXW11	23291	0.777903	-0.362338	0.0265003	D
									ILMN_1691402	LOC644162	NA	0.77804	-0.362084	0.01623	D
									ILMN_3226214	LOC728755	728755	0.77843	-0.361361	0.0419616	D
									ILMN_1769031	FRAP1	NA	0.778487	-0.361256	0.0265003	D
									ILMN_1775011	NOL10	79954	0.778611	-0.361026	0.0419616	D
									ILMN_1651684	KIAA0586	9786	0.778762	-0.360746	0.0419616	D
									ILMN_2108357	RPL39L	116832	0.778809	-0.360658	0.0419616	D
									ILMN_2136635	ISCA2	122961	0.778823	-0.360633	0.0265003	D
									ILMN_3248403	LOC100132717	NA	0.778942	-0.360412	0.0265003	D
									ILMN_1751072	SRPRB	58477	0.778967	-0.360365	0.0265003	D
									ILMN_1750051	FLJ39827	NA	0.779043	-0.360224	0.0419616	D
									ILMN_1750864	NIN	51199	0.779227	-0.359884	0.0419616	D
									ILMN_1769158	ISOC2	79763	0.779424	-0.359519	0.0419616	D
									ILMN_1793724	C3ORF31	NA	0.779455	-0.359463	0.0265003	D
									ILMN_1654217	MPP2	4355	0.779526	-0.359331	0.01623	D
									ILMN_1711823	C17ORF70	NA	0.779747	-0.358922	0.0419616	D
									ILMN_3246065	CCDC151	115948	0.779807	-0.358811	0.0265003	D
									ILMN_1717674	PEPD	5184	0.779994	-0.358465	0.01623	D
									ILMN_1799667	KIF4A	24137	0.780078	-0.35831	0.01623	D
									ILMN_2313901	PAM	5066	0.780211	-0.358064	0.01623	D
									ILMN_1857915	LOC401397	NA	0.780216	-0.358054	0.0419616	D
									ILMN_1660582	LIG3	3980	0.780327	-0.357849	0.01623	D
									ILMN_1668012	SLC25A13	10165	0.78054	-0.357455	0.01623	D
									ILMN_1655796	MARCH3	NA	0.780587	-0.357368	0.01623	D
									ILMN_2387599	C20ORF24	NA	0.780604	-0.357337	0.0265003	D
									ILMN_1659285	PSMG1	8624	0.780754	-0.35706	0.0419616	D
									ILMN_2189993	MRPS35	60488	0.780757	-0.357055	0.0419616	D
									ILMN_2072622	FLJ12684	NA	0.78087	-0.356846	0.0419616	D
									ILMN_1651557	KDELC2	NA	0.781147	-0.356334	0.0419616	D
									ILMN_1730229	CGNL1	84952	0.781189	-0.356256	0.0265003	D
									ILMN_1719170	WBSCR27	NA	0.781209	-0.356219	0.0265003	D
									ILMN_2384591	HN1	NA	0.781671	-0.355367	0.0419616	D
									ILMN_1769601	MGC16169	NA	0.781741	-0.355238	0.0419616	D
									ILMN_1764483	PSG2	5670	0.782148	-0.354486	0.0368884	D
									ILMN_2328776	MST4	NA	0.782178	-0.354432	0.0419616	D
									ILMN_3244405	LOC100134172	NA	0.782185	-0.354418	0.01623	D
									ILMN_1720604	ARSG	22901	0.782803	-0.353278	0.0265003	D
									ILMN_1789436	C1ORF218	NA	0.782808	-0.35327	0.0265003	D
									ILMN_1769187	LOC644743	NA	0.782838	-0.353214	0.0419616	D
									ILMN_2155998	PSMD6	9861	0.783408	-0.352163	0.01623	D
									ILMN_1701512	KIAA0391	NA	0.783477	-0.352038	0.01623	D
									ILMN_2180371	C12ORF24	NA	0.78349	-0.352013	0.01623	D
									ILMN_2197030	ZFYVE21	79038	0.783995	-0.351083	0.0265003	D
									ILMN_1784749	GAS6	2621	0.784021	-0.351036	0.0265003	D
									ILMN_2320850	UBE2D3	7323	0.784154	-0.35079	0.0265003	D
									ILMN_2228873	STARD3NL	83930	0.784204	-0.350698	0.01623	D
									ILMN_2104106	XPR1	9213	0.78431	-0.350504	0.0419616	D
									ILMN_1710482	APLP2	334	0.784442	-0.350262	0.0419616	D
									ILMN_1706652	OGG1	4968	0.784537	-0.350086	0.0419616	D
									ILMN_1763640	KIAA1602	NA	0.784641	-0.349895	0.0419616	D
									ILMN_2306955	ACPL2	NA	0.78471	-0.349769	0.0419616	D
									ILMN_1684699	ELF5	2001	0.784802	-0.3496	0.0265003	D
									ILMN_2285375	SORD	6652	0.784989	-0.349255	0.0368884	D
									ILMN_1676336	AADACL1	NA	0.785145	-0.348969	0.0265003	D
									ILMN_2317923	TMEM132A	54972	0.785491	-0.348333	0.0265003	D
									ILMN_1715384	B3GNT6	192134	0.7855	-0.348316	0.01623	D
									ILMN_1688464	MAP6D1	79929	0.785552	-0.348222	0.0419616	D
									ILMN_1724207	IVD	3712	0.785573	-0.348183	0.0419616	D
									ILMN_2197846	HADHB	3032	0.785589	-0.348154	0.01623	D
									ILMN_1733581	C16ORF35	NA	0.785616	-0.348103	0.0265003	D
									ILMN_1756784	FREQ	NA	0.785993	-0.347412	0.01623	D
									ILMN_1658152	MAP3K10	4294	0.786041	-0.347324	0.0419616	D
									ILMN_1716687	TPM1	7168	0.786123	-0.347174	0.01623	D
									ILMN_3249261	LOC100132299	NA	0.786187	-0.347055	0.0419616	D
									ILMN_1801348	GOT2	2806	0.786198	-0.347035	0.01623	D
									ILMN_1698307	DBNL	28988	0.786621	-0.346259	0.01623	D
									ILMN_1720889	SC4MOL	NA	0.786944	-0.345667	0.0419616	D
									ILMN_2162253	NMU	10874	0.78701	-0.345547	0.0419616	D
									ILMN_2230577	RABGEF1	27342	0.787185	-0.345226	0.01623	D
									ILMN_1785284	ALDH6A1	4329	0.787186	-0.345224	0.01623	D
									ILMN_1810100	PBX3	5090	0.787287	-0.345039	0.01623	D
									ILMN_1721218	KRT13	3860	0.787305	-0.345006	0.0419616	D
									ILMN_1769810	ARL6IP5	10550	0.787323	-0.344972	0.0419616	D
									ILMN_3195497	LOC100128309	NA	0.787552	-0.344552	0.0419616	D
									ILMN_1713162	GSTM2	2946	0.787652	-0.344369	0.01623	D
									ILMN_1811624	THADA	63892	0.787809	-0.344083	0.0419616	D
									ILMN_1739805	NDE1	54820	0.788099	-0.343552	0.01623	D
									ILMN_1724437	GCAT	23464	0.788291	-0.3432	0.01623	D
									ILMN_1799367	TXNDC14	NA	0.788307	-0.34317	0.01623	D
									ILMN_1742813	TMEM167A	153339	0.788414	-0.342975	0.01623	D
									ILMN_3283032	LOC100132535	NA	0.788416	-0.342971	0.01623	D
									ILMN_1716895	RPA3	6119	0.788434	-0.342938	0.0419616	D
									ILMN_2225318	SMS	6611	0.788495	-0.342827	0.0265003	D
									ILMN_1754969	LMCD1	29995	0.788575	-0.342681	0.0265003	D
									ILMN_1703500	KCNQ2	3785	0.788648	-0.342546	0.0419616	D
									ILMN_3301236	LOC728558	NA	0.788728	-0.342401	0.0189035	D
									ILMN_2266005	C21ORF51	NA	0.788739	-0.342379	0.0265003	D
									ILMN_1666208	C14ORF106	NA	0.788751	-0.342359	0.0419616	D
									ILMN_1715693	LOC440160	NA	0.788892	-0.3421	0.01623	D
									ILMN_3270473	LOC100128918	NA	0.789076	-0.341763	0.01623	D
									ILMN_1776052	LOC148915	NA	0.7891	-0.34172	0.01623	D
									ILMN_1727194	CALU	813	0.789221	-0.341499	0.0265003	D
									ILMN_1690844	LOC387820	387820	0.789404	-0.341164	0.01623	D
									ILMN_1680110	C10ORF116	NA	0.789592	-0.340822	0.01623	D
									ILMN_1653828	CHFR	55743	0.78983	-0.340386	0.0265003	D
									ILMN_1710428	CDC2	NA	0.789838	-0.340371	0.01623	D
									ILMN_1690282	CRADD	8738	0.789843	-0.340363	0.01623	D
									ILMN_1681628	ZNF277	11179	0.789931	-0.340202	0.0419616	D
									ILMN_2081988	LANCL1	10314	0.790031	-0.340018	0.01623	D
									ILMN_1738712	GPR180	160897	0.790209	-0.339695	0.01623	D
									ILMN_3211079	LOC148430	148430	0.790214	-0.339684	0.0265003	D
									ILMN_1705397	PDK2	5164	0.790215	-0.339682	0.0419616	D
									ILMN_1658425	DAG1	1605	0.790324	-0.339484	0.0265003	D
									ILMN_1696127	KIAA0240	NA	0.790352	-0.339433	0.01623	D
									ILMN_2053921	CAPZB	832	0.790571	-0.339033	0.01623	D
									ILMN_1761938	RAC1	5879	0.790716	-0.338768	0.0265003	D
									ILMN_1815203	HMGCS2	3158	0.79079	-0.338634	0.0265003	D
									ILMN_1694778	LOC646723	NA	0.790825	-0.338569	0.01623	D
									ILMN_3272500	IFI27L1	122509	0.791434	-0.337458	0.0419616	D
									ILMN_1726840	B3GALNT1	8706	0.791474	-0.337386	0.0265003	D
									ILMN_1778242	CALM1	801	0.791484	-0.337369	0.01623	D
									ILMN_2382990	HK1	3098	0.791514	-0.337313	0.0419616	D
									ILMN_1738784	PPP2R5A	5525	0.79179	-0.33681	0.0419616	D
									ILMN_1801378	COQ3	51805	0.791865	-0.336673	0.01623	D
									ILMN_1773780	FAM173A	NA	0.791966	-0.33649	0.01623	D
									ILMN_2362902	RASSF5	83593	0.792254	-0.335964	0.0265003	D
									ILMN_1769082	TXNDC5	81567	0.792359	-0.335774	0.01623	D
									ILMN_1700337	TROAP	10024	0.792537	-0.335449	0.0419616	D
									ILMN_2415572	GALC	2581	0.792697	-0.335159	0.0265003	D
									ILMN_2411723	RPSA	3921	0.792906	-0.334779	0.0265003	D
									ILMN_1685954	HMBS	3145	0.792925	-0.334743	0.0419616	D
									ILMN_3243682	C1orf93	NA	0.793013	-0.334584	0.0419616	D
									ILMN_1660027	FCGR2B	2213	0.793014	-0.334582	0.0320887	D
									ILMN_1809496	COPG2	26958	0.793198	-0.334246	0.0419616	D
									ILMN_1710124	CMTM8	152189	0.7933	-0.334061	0.0419616	D
									ILMN_1657679	VAV3	10451	0.793397	-0.333886	0.0265003	D
									ILMN_1659753	LAMP2	3920	0.793549	-0.333608	0.0419616	D
									ILMN_3243381	MLEC	9761	0.79355	-0.333607	0.0265003	D
									ILMN_1695576	MRPL24	79590	0.79357	-0.333571	0.0265003	D
									ILMN_1746492	RABL4	NA	0.793668	-0.333392	0.0265003	D
									ILMN_3297455	LOC729082	NA	0.793757	-0.33323	0.01623	D
									ILMN_3190972	LOC100130291	NA	0.793771	-0.333205	0.0419616	D
									ILMN_1661170	NDUFB8	4714	0.793845	-0.333071	0.0419616	D
									ILMN_1720344	NIPA2	81614	0.793851	-0.33306	0.0265003	D
									ILMN_1764321	ACOT4	122970	0.793978	-0.332829	0.0265003	D
									ILMN_1715476	LOC649970	NA	0.794002	-0.332786	0.01623	D
									ILMN_1726391	MRPL39	54148	0.794029	-0.332737	0.01623	D
									ILMN_1764654	LOC647993	NA	0.794054	-0.332691	0.0419616	D
									ILMN_1685413	ALG8	79053	0.794333	-0.332184	0.01623	D
									ILMN_1660847	PFKFB3	5209	0.794422	-0.332022	0.0419616	D
									ILMN_1666269	CTSZ	1522	0.794553	-0.331785	0.0419616	D
									ILMN_1755643	MGAT4A	11320	0.794586	-0.331725	0.0419616	D
									ILMN_1698139	TCEA1	6917	0.794715	-0.331491	0.01623	D
									ILMN_1796762	CCDC102A	92922	0.794767	-0.331396	0.0265003	D
									ILMN_1712298	ANKRD46	157567	0.794774	-0.331383	0.0419616	D
									ILMN_1651315	HMG20B	10362	0.794975	-0.331018	0.0265003	D
									ILMN_2296843	GCDH	2639	0.795165	-0.330675	0.0419616	D
									ILMN_1745034	SLC11A2	4891	0.795266	-0.33049	0.01623	D
									ILMN_1714577	OGDHL	55753	0.795295	-0.330438	0.01623	D
									ILMN_1717420	UBE2W	55284	0.795674	-0.329751	0.0265003	D
									ILMN_1813604	NDUFB7	4713	0.795825	-0.329477	0.0419616	D
									ILMN_1693233	KIAA0513	9764	0.795971	-0.329211	0.0265003	D
									ILMN_1771746	C6ORF165	NA	0.796074	-0.329026	0.0419616	D
									ILMN_1813561	SCIN	85477	0.796101	-0.328976	0.01623	D
									ILMN_1767960	NSUN7	79730	0.796376	-0.328478	0.01623	D
									ILMN_1749403	TSPAN33	340348	0.796381	-0.32847	0.01623	D
									ILMN_2194627	GMCL1	64395	0.796467	-0.328314	0.0419616	D
									ILMN_2266309	CEPT1	10390	0.796562	-0.328142	0.01623	D
									ILMN_1738759	PIGT	51604	0.796623	-0.32803	0.01623	D
									ILMN_1692826	UNKL	64718	0.796652	-0.327979	0.01623	D
									ILMN_1711878	ENOPH1	58478	0.796758	-0.327787	0.0419616	D
									ILMN_1690982	DDT	1652	0.796788	-0.327732	0.0265003	D
									ILMN_3295494	LOC389386	NA	0.796873	-0.327579	0.0265003	D
									ILMN_3251445	MED27	9442	0.797038	-0.32728	0.0419616	D
									ILMN_3290380	LOC387703	NA	0.797303	-0.3268	0.01623	D
									ILMN_1678729	SIL1	64374	0.797345	-0.326724	0.01623	D
									ILMN_1736700	ALDOA	226	0.797375	-0.32667	0.0419616	D
									ILMN_1768393	SNRPD1	6632	0.797428	-0.326574	0.0265003	D
									ILMN_1723021	ICMT	23463	0.797515	-0.326416	0.01623	D
									ILMN_2246661	FAHD1	81889	0.79768	-0.326118	0.0265003	D
									ILMN_1805028	THOC7	80145	0.797681	-0.326116	0.0419616	D
									ILMN_2373495	H2AFY	NA	0.797845	-0.32582	0.01623	D
									ILMN_1682326	PCP4	5121	0.798007	-0.325526	0.0419616	D
									ILMN_1762436	UBB	7314	0.798023	-0.325499	0.0265003	D
									ILMN_1753472	SUMF1	285362	0.798134	-0.325297	0.0265003	D
									ILMN_1761242	COMMD1	150684	0.798181	-0.325212	0.0419616	D
									ILMN_1797893	PFAAP5	NA	0.798214	-0.325152	0.01623	D
									ILMN_1771593	RRM1	6240	0.798313	-0.324973	0.0265003	D
									ILMN_1683827	VPS24	NA	0.798438	-0.324749	0.0419616	D
									ILMN_1726893	EPN3	55040	0.798486	-0.324661	0.01623	D
									ILMN_1697793	SYNJ2BP	55333	0.798707	-0.324262	0.0419616	D
									ILMN_2393144	ARL6IP4	51329	0.798725	-0.324229	0.0419616	D
									ILMN_3227263	SLC22A23	63027	0.798812	-0.324073	0.0419616	D
									ILMN_3235472	WDYHV1	55093	0.798831	-0.324038	0.0419616	D
									ILMN_3241118	LOC641727	NA	0.798861	-0.323984	0.0419616	D
									ILMN_1804530	LOC653888	NA	0.79891	-0.323894	0.01623	D
									ILMN_1744914	FUCA2	2519	0.799063	-0.323619	0.0265003	D
									ILMN_1709043	C9ORF46	NA	0.79908	-0.323588	0.01623	D
									ILMN_1652237	CBR3	874	0.799154	-0.323455	0.0265003	D
									ILMN_1726755	COPS4	51138	0.799173	-0.32342	0.01623	D
									ILMN_1806040	TYMS	7298	0.799245	-0.323291	0.01623	D
									ILMN_1814230	MTCP1	4515	0.799353	-0.323095	0.01623	D
									ILMN_2191436	POLA1	5422	0.799436	-0.322945	0.0419616	D
									ILMN_1751753	IDH2	3418	0.799491	-0.322847	0.01623	D
									ILMN_1741957	RABEPK	10244	0.799517	-0.3228	0.0265003	D
									ILMN_1804822	SRXN1	140809	0.799561	-0.322721	0.0419616	D
									ILMN_3311190	NCRNA00173	NA	0.799873	-0.322157	0.0265003	D
									ILMN_1684391	PLOD1	5351	0.799985	-0.321955	0.01623	D
									ILMN_1793287	LOC642755	NA	0.800144	-0.321668	0.0419616	D
									ILMN_2373763	CASP7	840	0.800153	-0.321651	0.0419616	D
									ILMN_2382724	C17ORF95	NA	0.800184	-0.321597	0.0419616	D
									ILMN_1744118	ASTN2	23245	0.800304	-0.321379	0.0419616	D
									ILMN_1712719	MAP7	9053	0.800359	-0.321281	0.0265003	D
									ILMN_1732140	ABCC11	85320	0.800433	-0.321147	0.0265003	D
									ILMN_1800659	PGM1	5236	0.800547	-0.320942	0.01623	D
									ILMN_1716583	NME7	29922	0.800629	-0.320793	0.0419616	D
									ILMN_1762787	RNF26	79102	0.800647	-0.320761	0.0419616	D
									ILMN_1806804	USP14	9097	0.800712	-0.320645	0.0419616	D
									ILMN_2342437	KLHL5	51088	0.800991	-0.320143	0.0419616	D
									ILMN_2412927	GMPPB	29925	0.80132	-0.31955	0.0419616	D
									ILMN_1673111	TSEN34	79042	0.80136	-0.319477	0.01623	D
									ILMN_1709287	LOC651575	NA	0.80149	-0.319243	0.0265003	D
									ILMN_1665538	SKP2	6502	0.801683	-0.318897	0.0265003	D
									ILMN_1742250	CCNH	902	0.801699	-0.318867	0.0265003	D
									ILMN_2167616	NACA	4666	0.801748	-0.318778	0.0265003	D
									ILMN_1652409	SPATA7	55812	0.801777	-0.318727	0.0419616	D
									ILMN_2133799	ACAT2	39	0.801903	-0.3185	0.0419616	D
									ILMN_1709750	SUSD1	64420	0.801943	-0.318428	0.0419616	D
									ILMN_1730794	SERTAD4	56256	0.802044	-0.318247	0.01623	D
									ILMN_1803824	ZDHHC9	51114	0.802555	-0.317327	0.01623	D
									ILMN_1678268	VPS8	23355	0.802953	-0.316612	0.01623	D
									ILMN_1680353	NSF	4905	0.803002	-0.316525	0.01623	D
									ILMN_2101375	CCDC77	84318	0.803014	-0.316503	0.0419616	D
									ILMN_1695763	PDIA5	10954	0.803037	-0.316462	0.01623	D
									ILMN_2128668	FOXJ3	22887	0.803048	-0.316443	0.0265003	D
									ILMN_1801633	C20ORF52	NA	0.803073	-0.316397	0.0419616	D
									ILMN_2297887	SEZ6L2	26470	0.803156	-0.316248	0.0265003	D
									ILMN_1671005	IRF2BP2	359948	0.803194	-0.31618	0.0265003	D
									ILMN_1651958	MGP	4256	0.803199	-0.31617	0.01623	D
									ILMN_1722642	REEP3	221035	0.803283	-0.316019	0.0419616	D
									ILMN_1755364	RALA	5898	0.803336	-0.315924	0.0419616	D
									ILMN_1759277	OIP5	11339	0.803378	-0.31585	0.0265003	D
									ILMN_1715324	HSD17B8	7923	0.803517	-0.315599	0.0419616	D
									ILMN_1738342	METT5D1	NA	0.803662	-0.315339	0.01623	D
									ILMN_1725510	DHCR24	1718	0.803692	-0.315286	0.0265003	D
									ILMN_2328029	EXT2	2132	0.803996	-0.31474	0.01623	D
									ILMN_1677162	SFRS13A	NA	0.804553	-0.313741	0.0265003	D
									ILMN_1671116	C3ORF21	NA	0.804609	-0.31364	0.0265003	D
									ILMN_1803611	SNAPC3	6619	0.804694	-0.313487	0.0419616	D
									ILMN_1664516	CENPF	1063	0.804714	-0.313452	0.01623	D
									ILMN_1793598	APIP	51074	0.804725	-0.313432	0.01623	D
									ILMN_1656540	RUVBL1	8607	0.8051	-0.31276	0.0419616	D
									ILMN_1661589	CD151	977	0.805229	-0.312529	0.0419616	D
									ILMN_2054121	C6orf126	NA	0.805344	-0.312324	0.0265003	D
									ILMN_3251145	LDHA	3939	0.805358	-0.312298	0.01623	D
									ILMN_1796085	PPM1B	5495	0.80544	-0.312152	0.0419616	D
									ILMN_1774659	LOC652388	NA	0.805481	-0.312077	0.0265003	D
									ILMN_3294222	LOC100132673	NA	0.805562	-0.311933	0.0265003	D
									ILMN_1691104	PGAM4	441531	0.805605	-0.311855	0.0265003	D
									ILMN_1799856	NOMO2	283820	0.805623	-0.311823	0.0265003	D
									ILMN_1797701	ZNF214	7761	0.805667	-0.311744	0.0226545	D
									ILMN_2338997	PTP4A2	8073	0.805711	-0.311666	0.0419616	D
									ILMN_1730260	N6AMT2	NA	0.805819	-0.311473	0.01623	D
									ILMN_1763568	ZDHHC16	84287	0.805858	-0.311402	0.0419616	D
									ILMN_2214144	TWSG1	57045	0.805919	-0.311294	0.0419616	D
									ILMN_1690646	SATB1	6304	0.806035	-0.311086	0.0419616	D
									ILMN_2101885	TUBB	203068	0.806096	-0.310976	0.0419616	D
									ILMN_1687315	RXRA	6256	0.80611	-0.310951	0.0419616	D
									ILMN_1810875	SYNGR1	9145	0.806914	-0.309513	0.01623	D
									ILMN_1808765	ZNF25	219749	0.806924	-0.309495	0.0265003	D
									ILMN_2404539	C20ORF30	NA	0.807198	-0.309006	0.01623	D
									ILMN_1811592	ARHGAP21	57584	0.807259	-0.308897	0.0265003	D
									ILMN_1731783	ATP1A1	476	0.807338	-0.308756	0.0419616	D
									ILMN_2347044	SLC25A14	9016	0.807382	-0.308676	0.01623	D
									ILMN_3247560	BSPRY	54836	0.807552	-0.308373	0.0265003	D
									ILMN_1672080	NR2F6	2063	0.807651	-0.308197	0.0265003	D
									ILMN_3290261	LOC644877	NA	0.807707	-0.308096	0.0265003	D
									ILMN_3291352	LOC643778	NA	0.807922	-0.307711	0.0265003	D
									ILMN_1813836	DARS	NA	0.808027	-0.307525	0.0419616	D
									ILMN_2411915	ATG4B	23192	0.808042	-0.307497	0.0419616	D
									ILMN_2277334	KCNK2	3776	0.808045	-0.307493	0.01623	D
									ILMN_1720282	NQO1	1728	0.808258	-0.307112	0.01623	D
									ILMN_1724040	ANKRD57	NA	0.808258	-0.307111	0.0265003	D
									ILMN_2038776	TXN	7295	0.808312	-0.307015	0.0419616	D
									ILMN_3190707	LOC100130855	NA	0.808617	-0.306472	0.0402387	D
									ILMN_1663541	B4GALT7	11285	0.808653	-0.306407	0.0419616	D
									ILMN_2144088	FDFT1	2222	0.808667	-0.306383	0.0419616	D
									ILMN_2124352	DCUN1D5	84259	0.808686	-0.306348	0.0419616	D
									ILMN_1671693	C18ORF10	NA	0.809056	-0.305688	0.01623	D
									ILMN_1686748	TMEM9	252839	0.809137	-0.305544	0.0265003	D
									ILMN_1746819	C5	727	0.809671	-0.304592	0.01623	D
									ILMN_1790537	C16ORF75	NA	0.809744	-0.304461	0.01623	D
									ILMN_3226807	NHP2	55651	0.809787	-0.304386	0.01623	D
									ILMN_1664233	LOC644590	NA	0.809827	-0.304315	0.0419616	D
									ILMN_1692121	USO1	8615	0.809893	-0.304196	0.01623	D
									ILMN_1732809	ALG9	79796	0.810062	-0.303896	0.01623	D
									ILMN_1685703	ACOX2	8309	0.810118	-0.303796	0.0419616	D
									ILMN_2307744	CD46	4179	0.810143	-0.303752	0.0419616	D
									ILMN_3283960	LOC439950	NA	0.810158	-0.303725	0.0419616	D
									ILMN_1815184	ASPM	259266	0.810189	-0.30367	0.01623	D
									ILMN_1665601	LOC728944	NA	0.81024	-0.303578	0.01623	D
									ILMN_1724609	SLC2A8	29988	0.810533	-0.303057	0.0419616	D
									ILMN_1753608	TMEM131	23505	0.810683	-0.30279	0.01623	D
									ILMN_1720053	ZFAND3	60685	0.810708	-0.302746	0.0265003	D
									ILMN_1651719	MBTPS1	8720	0.810742	-0.302685	0.01623	D
									ILMN_1684289	PNPO	55163	0.810781	-0.302615	0.01623	D
									ILMN_3244935	LOC100130308	NA	0.810872	-0.302454	0.01623	D
									ILMN_1790549	TSPAN3	10099	0.810876	-0.302447	0.0265003	D
									ILMN_1684168	GSTZ1	2954	0.810946	-0.302322	0.01623	D
									ILMN_1680955	AURKA	6790	0.811247	-0.301787	0.0265003	D
									ILMN_2212763	ICAM3	3385	0.81131	-0.301675	0.0419616	D
									ILMN_1743340	CHST14	113189	0.811371	-0.301566	0.01623	D
									ILMN_1759628	ATP1B3	483	0.811521	-0.301299	0.0419616	D
									ILMN_1730032	BOK	666	0.811935	-0.300564	0.0419616	D
									ILMN_1681591	PTPN1	5770	0.811948	-0.300541	0.0265003	D
									ILMN_2386891	GLT8D1	55830	0.811981	-0.300482	0.01623	D
									ILMN_1706784	H2AFV	NA	0.812156	-0.30017	0.0419616	D
									ILMN_1715705	SSNA1	8636	0.812172	-0.300143	0.0419616	D
									ILMN_2358647	FBXO21	23014	0.812191	-0.300109	0.0419616	D
