# Supplementary material for: TP53mutation–associated and copy number–dependent KDM7A-DT expression affects DNA repair and promotes invasive breast cancer progression
Source: Research Square preprint supplement (doi:10.21203/rs.3.rs-1896103/v3), 2022-09-27
Supplement: Supplementary file 17 [file 9ee04a5e59d550b46acdbd79.xlsx]

## Sheet: ST2
Table S2. Differentially expression analysis of our microarray data sets. Complete lists of MRC5 and T47D gene expression datasets.
			MRC5			T47D-Group-A			T47D-Group-B			T47D-Group-C			T47D-Group-D
ProbeID	GenesID	EntrezID	Fold-Change	Log2(Fold-Change)	P-Value	Fold-Change	Log2(Fold-Change)	P-Value	Fold-Change	Log2(Fold-Change)	P-Value	Fold-Change	Log2(Fold-Change)	P-Value	Fold-Change	Log2(Fold-Change)	P-Value
ILMN_1762337	7A5	NA	0.980099	-0.029	0.885867
ILMN_2055271	A1BG	1				1.001	0.00143996	1	0.907961	-0.139297	0.648503	0.79484	-0.331264	0.0149092	0.720964	-0.472001	0.195562
ILMN_1779670	A1CF	29974	0.99103	-0.013	0.942992
ILMN_1653355	A26C3	NA	1.11188	0.153	0.340183
ILMN_1814316	A2BP1	NA	0.917004	-0.125	0.463861
ILMN_3241953	A2LD1	NA	0.920188	-0.12	0.451542	1.22773	0.295992	1	1.03918	0.0554403	0.5791	0.874508	-0.193457	0.250998	0.740202	-0.434009	0.195562
ILMN_1745607	A2M	2	0.529609	-0.917	1e-06
ILMN_1735045	A4GALT	53947	0.762072	-0.392	0.010918				0.927311	-0.108875	0.77283
ILMN_1680754	A4GNT	51146	1.14076	0.19	0.289061	0.684651	-0.546559	0.382733	0.568941	-0.813649	0.518605	0.87401	-0.194279	0.401387	0.726297	-0.461369	0.261572
ILMN_1659452	AAA1	100329167							0.989977	-0.0145334	0.540291	0.712403	-0.489234	0.148915
ILMN_1755321	AAAS	8086	1.14314	0.193	0.176886	0.718878	-0.476181	0.19043	0.763526	-0.389251	0.0265003	0.978913	-0.0307472	0.658843	1.03971	0.0561827	0.853307
ILMN_1698554	AACS	65985	0.942131	-0.086	0.593155	0.886391	-0.173985	0.0808556	0.767928	-0.380957	0.0644577	0.848638	-0.236779	0.157704	0.735221	-0.443751	0.195562
ILMN_1814092	AACSL	NA				0.877289	-0.188876	0.382733	1.12786	0.173589	0.853307	0.738065	-0.438181	0.0921936	0.948871	-0.0757165	0.609834
ILMN_1676336	AADACL1	NA	0.895646	-0.159	0.222666	0.871181	-0.198956	1	0.780655	-0.357244	0.195562	0.942727	-0.0850875	0.479929	0.785145	-0.348969	0.0265003
ILMN_1752884	AADACL2	344752	0.92723	-0.109	0.533004
ILMN_1668851	AADACL4	343066	1.09429	0.13	0.511029
ILMN_2270015	AADAT	51166							0.768238	-0.380374	1	0.973575	-0.0386359	1
ILMN_3237396	AAGAB	79719	1.07029	0.098	0.603845	1.11574	0.158001	0.662521	0.952027	-0.0709258	0.0419616	1.01261	0.018073	0.536499	0.864026	-0.210853	0.0419616
ILMN_1688755	AAK1	22848	1.13918	0.188	0.121147	0.827915	-0.272446	0.540291	0.671532	-0.574472	0.148915	0.803488	-0.315652	0.371093	0.651719	-0.617679	1
ILMN_1653165	AAMP	14	1.07848	0.109	0.495165	0.840026	-0.251494	0.19043	0.894068	-0.161543	0.459543	0.948261	-0.0766439	0.658843	1.00927	0.0133076	1
ILMN_1662364	AARS	NA	0.890076	-0.168	0.179207	1.03032	0.0430949	1	0.966977	-0.0484462	0.355226	0.843705	-0.245189	0.289315	0.791834	-0.33673	0.0960923
ILMN_1674698	AARS2	57505	0.925946	-0.111	0.424921	0.963407	-0.0537825	0.382733	0.965754	-0.0502728	0.5791	0.801623	-0.319005	0.216373	0.803575	-0.315495	0.139087
ILMN_1700461	AARSD1	80755	0.984184	-0.023	0.933779	1.21993	0.286793	1	1.11903	0.16225	0.853307	0.93364	-0.0990617	0.723932	0.856423	-0.223605	0.853307
ILMN_1784269	AASDH	132949	1.06437	0.09	0.559464	0.873089	-0.195799	0.382733	1.04476	0.063174	0.853307	0.938697	-0.0912682	0.157704	1.12327	0.167705	0.5791
ILMN_1698189	AASDHPPT	60496	1.20414	0.268	0.092739	1.22948	0.298043	1	1.02275	0.0324476	0.5791	0.832958	-0.263684	0.331387	0.832452	-0.264561	0.0419616
ILMN_2157219	AASS	10157	0.906262	-0.142	0.418981
ILMN_1703743	AATF	26574	1.40444	0.49	0.000216	0.948133	-0.0768383	0.662521	0.899172	-0.153331	0.355226	0.94484	-0.0818588	0.216373	0.896048	-0.158352	0.355226
ILMN_1687609	AATK	9625	1.02172	0.031	0.872817	0.714934	-0.484118	0.19043	0.6297	-0.667264	0.195562	0.86515	-0.208978	0.470486	0.74543	-0.423855	0.487453
ILMN_2404407	ABAT	18	0.922103	-0.117	0.505675	0.728677	-0.456648	0.0808556	0.737938	-0.438428	0.0265003	0.775654	-0.366515	0.0272754	0.722312	-0.469307	0.0960923
ILMN_1766054	ABCA1	19	0.99654	-0.005	0.981234	0.907097	-0.140671	0.540291	2.81598	1.49364	0.29627	1.37953	0.464174	0.809894	4.28259	2.09848	0.0501862
ILMN_2070570	ABCA10	10349	0.865737	-0.208	0.095692	1.0834	0.115566	1	0.840549	-0.250596	0.2113	0.812521	-0.299522	0.386476	0.731541	-0.450989	0.288844
ILMN_2232084	ABCA11	NA				1.26578	0.34003	0.371093	1.20667	0.271033	0.267257	0.912453	-0.132178	0.809894	0.869842	-0.201174	0.561276
ILMN_2361400	ABCA12	26154				0.656655	-0.606793	0.386476	0.72826	-0.457475	0.358326	1.01626	0.023265	0.759463	1.12707	0.172583	0.77283
ILMN_1747627	ABCA2	20				0.726396	-0.461172	0.0808556	0.652977	-0.614896	0.0644577	0.978348	-0.03158	0.479929	0.879464	-0.185303	0.711531
ILMN_1758523	ABCA3	21	1.02598	0.037	0.865055	0.770725	-0.375712	0.0808556	0.761232	-0.393591	0.0419616	0.926407	-0.110283	0.216373	0.914996	-0.128162	0.5791
ILMN_1794965	ABCA4	24										0.804564	-0.313721	0.902523
ILMN_1743205	ABCA7	10347	0.963262	-0.054	0.754096	1.14999	0.201623	0.382733	1.02489	0.0354647	0.5791	1.00099	0.00142406	0.536499	0.892093	-0.164734	0.195562
ILMN_1796801	ABCA8	10351	0.934975	-0.097	0.520633				0.849082	-0.236024	0.386476	0.849161	-0.23589	0.24716
ILMN_1720501	ABCA9	10350	1.08523	0.118	0.288153	0.992104	-0.0114373	0.698535	0.975202	-0.0362269	0.816961	1.0098	0.0140683	0.885234	0.992596	-0.0107213	0.816961
ILMN_1812070	ABCB1	5243							1.46975	0.555575	0.540291	1.06435	0.0899673	0.77283
ILMN_1665730	ABCB10	23456	0.853226	-0.229	0.216149	1.1706	0.227246	0.382733	0.788117	-0.343518	0.139087	1.15511	0.20803	0.658843	0.77769	-0.362734	0.0419616
ILMN_2193980	ABCB6	10058	0.883927	-0.178	0.211074	1.00558	0.00802661	1	0.675816	-0.565297	0.0265003	1.05957	0.0834759	0.859819	0.7121	-0.489847	0.0419616
ILMN_1687840	ABCB7	22	1.17283	0.23	0.114015	1.4041	0.489649	0.662521	1.03508	0.0497479	0.853307	0.833021	-0.263574	0.157704	0.614091	-0.703475	0.01623
ILMN_1788928	ABCB9	23457	0.824734	-0.278	0.113185	0.663442	-0.591958	0.0808556	0.539558	-0.89015	0.0265003	0.924962	-0.112533	0.289315	0.930371	-0.104121	0.195562
ILMN_1802404	ABCC1	4363	0.901875	-0.149	0.23887	0.754795	-0.405844	0.19043	0.991297	-0.0126115	0.711531	0.936349	-0.0948819	0.413407	1.22974	0.29835	0.759463
ILMN_1776119	ABCC10	89845	0.899378	-0.153	0.328814	0.778715	-0.360832	0.0808556	0.854208	-0.227341	0.195562	0.721485	-0.470959	0.0933977	0.791429	-0.337468	0.267257
ILMN_1732140	ABCC11	85320	0.892547	-0.164	0.218971	0.855946	-0.224408	0.19043	0.682936	-0.550177	0.139087	0.975878	-0.0352271	0.413407	0.800433	-0.321147	0.0265003
ILMN_1762093	ABCC12	94160				0.614577	-0.702334	0.382733	0.675663	-0.565623	0.459543	0.700498	-0.513547	0.112351	0.770124	-0.376837	0.474959
ILMN_1678409	ABCC13	150000	0.961261	-0.057	0.757755	0.991827	-0.0118394	0.698535	0.886778	-0.173355	0.487453	1.04539	0.0640456	0.17791	0.732077	-0.449932	0.386476
ILMN_1717466	ABCC3	8714	0.993093	-0.01	0.960789	0.78766	-0.344355	0.382733	0.985632	-0.0208787	0.355226	0.68858	-0.538304	0.111961	0.861649	-0.214828	0.195562
ILMN_1788457	ABCC4	10257	1.04102	0.058	0.745072
ILMN_1706531	ABCC5	10057	0.894405	-0.161	0.413462	0.889322	-0.169223	1	0.935646	-0.0959646	0.5791	0.887294	-0.172515	0.536499	0.842709	-0.246893	0.355226
ILMN_1725414	ABCC6	368	1.11265	0.154	0.280129	0.779685	-0.359037	0.19043	0.793765	-0.333216	0.0644577	1.38369	0.468523	0.19043	0.798473	-0.324685	0.0644577
ILMN_3246902	ABCC6P1	653190	1.10038	0.138	0.29595	0.812251	-0.300002	0.662521	0.692522	-0.530068	0.195562	1.07126	0.0993116	1	0.913354	-0.130754	0.711531
ILMN_3244070	ABCC6P2	730013	0.938872	-0.091	0.606708	1.07475	0.103997	0.662521	0.8116	-0.30116	0.0960923	1.08715	0.120547	0.596242	0.820964	-0.284609	0.0960923
ILMN_2366473	ABCC9	10060	1.03598	0.051	0.783201				1.21024	0.275292	0.540291	0.65407	-0.612483	0.245278
ILMN_1772189	ABCD1	215	0.985549	-0.021	0.933326	0.728404	-0.457188	0.540291	0.790459	-0.339237	0.245278	0.769253	-0.378471	0.245278	0.834788	-0.260519	0.540291
ILMN_1674032	ABCD3	5825	1.02811	0.04	0.818964	1.1406	0.18979	1	0.98709	-0.0187467	0.355226	0.851442	-0.232019	0.0933977	0.736851	-0.440555	0.0960923
ILMN_2343917	ABCD4	5826	0.963262	-0.054	0.747195				0.571281	-0.807728	1
ILMN_1676846	ABCE1	6059	1.38319	0.468	0.001202	1.15986	0.213952	0.382733	1.03948	0.0558649	1	0.947267	-0.0781575	0.791082	0.678994	-0.558529	0.853307
ILMN_2392635	ABCF1	23	1.33422	0.416	0.000148	0.77452	-0.368625	0.19043	0.844432	-0.243947	0.0644577	0.957753	-0.0622751	0.377225	1.04935	0.0695016	1
ILMN_1781999	ABCF2	10061	1.24057	0.311	0.040641	0.79124	-0.337813	0.19043	0.979344	-0.0301127	0.711531	0.96896	-0.0454904	0.250998	0.932748	-0.10044	0.267257
ILMN_1810085	ABCF3	55324	1.16473	0.22	0.139685	0.793272	-0.334113	0.662521	0.88127	-0.182344	0.0960923	0.954588	-0.0670495	0.596242	1.06048	0.084719	0.711531
ILMN_1743638	ABCG1	9619	1.38032	0.465	0.019255	0.958094	-0.0617609	0.662521	0.839627	-0.252179	0.139087	0.918392	-0.122817	0.148915	0.751849	-0.411486	0.0644577
ILMN_1779470	ABCG4	64137	0.934975	-0.097	0.573349	0.586349	-0.770168	0.0808556	0.678164	-0.560293	0.0265003	1.05889	0.0825585	0.750824	1.2247	0.292433	0.361935
ILMN_1716592	ABCG5	64240	1.05336	0.075	0.660561
ILMN_1680309	ABCG8	64241	0.903127	-0.147	0.3572
ILMN_1743371	ABHD1	84696				0.848332	-0.237299	0.662521	0.759175	-0.397495	0.0960923	0.966146	-0.049687	0.596242	0.864607	-0.209883	0.195562
ILMN_1770031	ABHD10	55347				0.847165	-0.239285	0.662521	0.721662	-0.470605	0.0960923	0.986449	-0.0196834	0.596242	0.840312	-0.251003	0.5791
ILMN_2338268	ABHD11	83451	1.01537	0.022	0.909428	0.837547	-0.255758	0.19043	0.697542	-0.519647	0.01623	0.888759	-0.170137	0.185326	0.748911	-0.417135	0.0419616
ILMN_1745116	ABHD12	26090	0.825878	-0.276	0.024311	0.858465	-0.220168	0.0808556	0.665637	-0.587192	0.01623	1.0385	0.0544992	0.791082	0.808562	-0.30657	0.139087
ILMN_1707925	ABHD12B	145447	0.942785	-0.085	0.5725							1.37387	0.458242	1
ILMN_1785285	ABHD13	84945	0.954621	-0.067	0.728834
ILMN_1794213	ABHD14A	25864	0.778625	-0.361	0.004199	0.821009	-0.28453	0.382733	0.886916	-0.173131	0.355226	0.833256	-0.263169	0.531667	0.900146	-0.15177	0.609834
ILMN_2227533	ABHD14B	84836	1.17121	0.228	0.173225	0.680438	-0.555464	0.382733	0.639631	-0.644687	0.0960923	0.981749	-0.0265735	0.929637	0.922872	-0.115797	0.5791
ILMN_1769390	ABHD15	116236	0.908778	-0.138	0.37636	1.10527	0.144397	1	0.887618	-0.17199	0.267257	1.02424	0.0345525	1	0.822544	-0.281835	0.0644577
ILMN_1723662	ABHD2	11057	1.07029	0.098	0.479753	0.613143	-0.705704	0.19043	0.627164	-0.673086	0.0644577	0.898796	-0.153934	0.111961	0.770904	-0.375377	0.0265003
ILMN_1801767	ABHD3	171586				0.890065	-0.168018	1	0.618575	-0.692979	0.195562	1.00933	0.0133991	0.723932	0.701463	-0.511562	0.0419616
ILMN_1700633	ABHD4	63874	1.06659	0.093	0.612274	1.06376	0.0891708	0.77283	0.868451	-0.203484	0.107347	0.963947	-0.0529738	1	0.786965	-0.345629	0.361935
ILMN_1655702	ABHD5	51099	1.11729	0.16	0.3136	1.00678	0.00975372	1	1.02771	0.0394299	1	0.839182	-0.252944	0.289315	0.856623	-0.223268	0.195562
ILMN_1706344	ABHD6	57406	0.866337	-0.207	0.106651	0.942367	-0.0856389	0.19043	0.667732	-0.582659	0.0644577	0.952273	-0.0705521	0.791082	0.674751	-0.567573	0.0419616
ILMN_1719498	ABHD7	NA	0.839731	-0.252	0.152098				0.611116	-0.710482	1	1.01508	0.0215918	1
ILMN_1712707	ABHD8	79575	0.778625	-0.361	0.003108	0.987096	-0.0187378	0.382733	0.952196	-0.070669	0.459543	0.953461	-0.0687537	0.479929	0.919751	-0.120685	0.853307
ILMN_1699750	ABHD9	NA	0.938872	-0.091	0.583782	0.884687	-0.176761	1	0.856514	-0.223452	1	1.07957	0.110456	0.765594	1.04519	0.0637649	1
ILMN_2329958	ABI1	10006	1.08523	0.118	0.463861	1.31688	0.39712	0.662521	0.996103	-0.00563354	0.540291	1.0057	0.00819931	0.540291	0.769939	-0.377185	0.139087
ILMN_1775944	ABI2	10152	1.08448	0.117	0.429596	0.904506	-0.144799	0.662521	0.704577	-0.505171	0.267257	0.835437	-0.259398	0.0933977	0.734281	-0.445595	0.0265003
ILMN_1755658	ABI3	51225	1.03526	0.05	0.873627
ILMN_1673639	ABI3BP	25890	0.900002	-0.152	0.212675
ILMN_1713732	ABL1	25	1.30858	0.388	0.001879	1.0857	0.118619	0.382733	0.895543	-0.159165	0.267257	1.19487	0.256859	0.0520588	0.760073	-0.39579	0.459543
ILMN_1741628	ABL2	27	1.05848	0.082	0.599238				0.725844	-0.462268	0.540291	1.77616	0.828758	0.540291
ILMN_1731610	ABLIM1	3983	0.876606	-0.19	0.119859	0.760693	-0.394614	0.19043	0.727838	-0.458311	0.139087	0.754605	-0.406207	0.111961	0.655686	-0.608922	0.0265003
ILMN_1656940	ABLIM3	22885	0.779705	-0.359	0.006414							0.797478	-0.326484	1
ILMN_1731433	ABP1	NA				1.06463	0.0903584	1	0.862524	-0.213364	0.233038	0.997209	-0.00403233	0.927264	0.807898	-0.307755	0.366157
ILMN_1672878	ABR	29	0.75891	-0.398	0.000229	0.930032	-0.104647	0.0808556	0.806864	-0.309603	0.267257	1.08931	0.123419	0.596242	0.94505	-0.081537	0.5791
ILMN_1658083	ABT1	29777	1.1042	0.143	0.356103	0.925535	-0.11164	1	0.870108	-0.200734	0.853307	0.938142	-0.0921225	0.723932	0.881959	-0.181216	0.459543
ILMN_2367165	ABTB1	80325	1.1607	0.215	0.163086				1.30692	0.386176	0.464214	1.22009	0.28699	0.636602
ILMN_1753370	ABTB2	25841	1.06881	0.096	0.489901	1.14993	0.201547	0.662521	0.825619	-0.276452	0.195562	1.2813	0.357614	0.479929	0.919942	-0.120385	0.459543
ILMN_1738921	ACAA1	30	1.01045	0.015	0.95414	1.01234	0.0176939	1	1.00675	0.00970099	0.711531	0.851544	-0.231847	0.596242	0.84684	-0.239839	0.5791
ILMN_1660199	ACAA2	10449	0.880259	-0.184	0.10693	0.735791	-0.442632	0.0808556	0.84993	-0.234584	0.459543	1.02184	0.0311691	0.723932	1.18035	0.239218	0.0644577
ILMN_2331636	ACACA	31	1.54221	0.625	0.000161	0.901288	-0.14994	0.382733	0.804509	-0.313819	0.01623	0.997713	-0.00330296	0.250998	0.85498	-0.226038	0.01623
ILMN_1763852	ACACB	32				0.674689	-0.567706	0.0808556	0.75946	-0.396955	0.361935	0.823967	-0.279341	0.830324	0.927494	-0.10859	0.698535
ILMN_1687303	ACAD10	80724	1.06733	0.094	0.648472	0.907637	-0.139812	0.19043	0.899675	-0.152523	0.139087	0.84892	-0.236299	0.426777	0.841474	-0.249009	0.0644577
ILMN_1761058	ACAD11	84129	0.931095	-0.103	0.475242	0.981364	-0.0271391	0.662521	0.87013	-0.200698	0.267257	0.928945	-0.106335	0.13332	0.823652	-0.279894	0.0960923
ILMN_2225595	ACAD8	27034	0.891929	-0.165	0.272885	1.22428	0.291938	0.0808556	0.978939	-0.0307098	0.853307	0.887563	-0.172079	0.157704	0.828342	-0.271701	0.195562
ILMN_1775579	ACAD9	28976	0.697372	-0.52	2.2e-05	0.855881	-0.224519	0.662521	0.81663	-0.292246	0.195562	0.949744	-0.0743898	0.377225	0.906188	-0.142117	0.0960923
ILMN_2053679	ACADM	34	0.847332	-0.239	0.294384	1.24889	0.320647	0.662521	0.772437	-0.372511	0.267257	0.905529	-0.143168	0.377225	0.634406	-0.656523	0.0960923
ILMN_1795104	ACADS	35				0.933039	-0.09999	0.382733	0.814291	-0.296383	0.355226	0.918063	-0.123335	0.596242	0.801221	-0.319728	0.711531
ILMN_1806408	ACADVL	37	0.867539	-0.205	0.132259	0.820529	-0.285374	0.0808556	0.831307	-0.266546	0.0644577	0.727398	-0.459184	0.0636898	0.692837	-0.529412	0.0960923
ILMN_3236270	ACAP2	23527	1.22944	0.298	0.132819	1.00062	0.000895165	1	0.943161	-0.0844233	0.0960923	0.76553	-0.385468	0.0773886	0.721571	-0.470787	0.0265003
ILMN_1800008	ACAT1	38	1.12896	0.175	0.171412	0.988664	-0.0164471	0.662521	1.07041	0.098159	0.853307	0.923868	-0.114241	0.111961	1.00025	0.000365038	0.711531
ILMN_2133799	ACAT2	39	1.05555	0.078	0.696949	0.996163	-0.00554658	1	0.82252	-0.281877	0.139087	0.971193	-0.0421695	0.596242	0.801903	-0.3185	0.0419616
ILMN_1665945	ACBD3	64746	1.07326	0.102	0.556582	1.17023	0.226788	1	1.22929	0.297822	1	0.82131	-0.284001	0.426777	0.862761	-0.212967	0.711531
ILMN_1676288	ACBD4	79777	1.08598	0.119	0.493271	0.76118	-0.39369	0.19043	0.803359	-0.315883	0.355226	0.807415	-0.308618	0.111961	0.852156	-0.230811	1
ILMN_1693250	ACBD5	91452				0.656983	-0.606072	0.19043	0.803397	-0.315815	0.382733	0.628772	-0.669392	0.0741455	0.699111	-0.516406	0.133614
ILMN_1684271	ACBD6	84320	0.901875	-0.149	0.310376	0.941537	-0.0869102	0.382733	0.650352	-0.620707	0.0419616	1.02126	0.0303464	0.723932	0.705418	-0.50345	0.0419616
ILMN_1726388	ACBD7	414149				1.02304	0.0328611	0.662521	0.963723	-0.0533101	0.267257	0.96643	-0.0492623	0.658843	0.910396	-0.135434	0.195562
ILMN_1769694	ACCN2	NA	0.903127	-0.147	0.382917	0.930296	-0.104238	1	0.847178	-0.239263	0.195562	0.826206	-0.275427	0.0933977	0.752388	-0.410452	0.01623
ILMN_1734479	ACCN3	NA	1.02314	0.033	0.88134	0.837266	-0.256242	0.698535	1.07466	0.103876	0.883617	0.851876	-0.231285	0.385418	1.09341	0.128834	0.695299
ILMN_2394902	ACCN4	NA	0.93174	-0.102	0.59974
ILMN_1750295	ACCN5	NA
ILMN_3187680	ACCS	84680	0.821311	-0.284	0.022064	0.766611	-0.383434	0.662521	0.793674	-0.333382	0.459543	0.817842	-0.290106	0.13332	0.846714	-0.240054	0.459543
ILMN_1780630	ACCSL	390110
ILMN_1716480	ACD	65057	1.11188	0.153	0.386537	0.863375	-0.211941	0.0808556	0.667855	-0.582393	0.0960923	1.12254	0.166768	0.929637	0.868331	-0.203683	0.267257
ILMN_3235340	ACER2	340485	1.05702	0.08	0.63201	0.967013	-0.0483921	0.662521	1.03111	0.0442022	0.853307	0.910053	-0.135978	0.479929	0.970377	-0.0433834	0.459543
ILMN_3237774	ACER3	55331				1.02042	0.0291604	1	0.861576	-0.214949	0.254451	0.914059	-0.12964	0.443289	0.771774	-0.37375	0.0226545
ILMN_1780485	ACHE	43	0.998615	-0.002	0.990321	0.847655	-0.238451	0.540291	1.00969	0.0139118	0.698535	0.760842	-0.394331	0.24716	0.906282	-0.141969	0.723674
ILMN_1699636	ACIN1	22985	1.39668	0.482	0.000632	0.774834	-0.368041	0.382733	0.986559	-0.0195221	0.5791	0.81801	-0.28981	0.658843	1.04153	0.0587091	0.459543
ILMN_2371379	ACLY	47	1.15669	0.21	0.096216	0.918092	-0.12329	0.662521	0.847024	-0.239526	0.195562	0.950626	-0.0730501	0.426777	0.855857	-0.224559	0.139087
ILMN_1771348	ACN9	NA	1.22603	0.294	0.059978	0.679554	-0.55734	0.662521	0.638579	-0.647063	0.5791	1.57128	0.651939	0.596242	1.47654	0.562216	0.5791
ILMN_1750800	ACO1	48	0.755236	-0.405	0.564718	0.903173	-0.146927	0.662521	0.712326	-0.489391	0.0419616	0.944582	-0.0822515	0.250998	0.744986	-0.424716	0.01623
ILMN_1654861	ACO2	50	1.00347	0.005	0.981442	0.703641	-0.507089	0.0808556	0.785373	-0.34855	0.01623	0.84642	-0.240555	0.289315	0.944737	-0.0820153	0.459543
ILMN_2121389	ACOT1	641371	0.965936	-0.05	0.771412	0.890124	-0.167921	0.382733	0.800374	-0.321255	0.01623	0.931755	-0.101978	0.676103	0.868588	-0.203256	0.0960923
ILMN_2353978	ACOT11	26027	0.949342	-0.075	0.700197
ILMN_1785474	ACOT12	134526
ILMN_2188959	ACOT2	10965	0.99447	-0.008	0.974329	0.955997	-0.0649222	0.382733	0.821539	-0.283599	0.0644577	0.93054	-0.10386	0.536499	0.799663	-0.322537	0.355226
ILMN_1764321	ACOT4	122970				0.975564	-0.0356916	1	0.695663	-0.52354	0.01623	1.11344	0.155019	0.536499	0.793978	-0.332829	0.0265003
ILMN_2156699	ACOT6	641372				1.23093	0.299748	0.662521	0.769401	-0.378191	0.459543	1.19875	0.26153	0.13332	0.749287	-0.41641	0.195562
ILMN_2332250	ACOT7	11332	0.800515	-0.321	0.07556	0.848523	-0.236974	0.0808556	0.686056	-0.543601	0.01623	1.0366	0.051864	0.658843	0.739844	-0.434708	0.01623
ILMN_1679600	ACOT8	10005	1.01045	0.015	0.964349	1.1352	0.18294	1	0.861417	-0.215216	0.0960923	0.863743	-0.211326	0.723932	0.655432	-0.609483	0.0644577
ILMN_2367070	ACOT9	23597	0.949342	-0.075	0.678774	0.857077	-0.222504	0.19043	0.848474	-0.237058	0.195562	0.931063	-0.103049	0.185326	0.902379	-0.148195	0.267257
ILMN_1750158	ACOX1	51	0.93045	-0.104	0.535544	0.9737	-0.0384509	1	0.865383	-0.20859	0.853307	1.08426	0.116708	0.791082	0.963642	-0.0534314	0.355226
ILMN_1685703	ACOX2	8309	0.702709	-0.509	0.017831	0.992977	-0.0101675	1	0.789612	-0.340784	0.0265003	1.01876	0.0268201	0.723932	0.810118	-0.303796	0.0419616
ILMN_1743396	ACOX3	8310	0.893166	-0.163	0.228957	0.834647	-0.260761	0.0808556	0.793551	-0.333604	0.0419616	0.853896	-0.227867	0.596242	0.811852	-0.30071	0.195562
ILMN_1669633	ACP1	52	1.21419	0.28	0.015144	0.787297	-0.34502	0.19043	0.792123	-0.336204	0.139087	0.971615	-0.0415436	0.536499	0.831992	-0.265359	0.195562
ILMN_2104830	ACP2	53	0.607518	-0.719	2e-06	0.836573	-0.257438	0.662521	0.75603	-0.403485	0.195562	1.01254	0.0179781	0.331387	0.915055	-0.12807	0.0644577
ILMN_2234343	ACP6	51205	0.971307	-0.042	0.854366	0.85154	-0.231854	0.382733	0.901046	-0.150327	0.355226	0.915554	-0.127284	0.859819	0.968782	-0.0457561	1
ILMN_2306955	ACPL2	NA				1.12912	0.175201	0.662521	1.03624	0.0513625	0.711531	0.789984	-0.340104	0.0340692	0.78471	-0.349769	0.0419616
ILMN_1758323	ACPP	55	0.942785	-0.085	0.770542
ILMN_2351906	ACPT	NA	1.12662	0.172	0.329136	1.14165	0.191124	1	0.862304	-0.213731	0.5791	1.06222	0.0870817	0.832339	0.802307	-0.317774	1
ILMN_1666690	ACRC	NA	1.16554	0.221	0.227862	0.896749	-0.157224	0.698535	1.56144	0.642881	0.125506	0.979832	-0.0293929	0.929637	1.70611	0.770713	0.409395
ILMN_2320277	ACRV1	56	0.95396	-0.068	0.757096							1.60757	0.684877	1
ILMN_2227011	ACSBG1	23205							1.06087	0.0852413	1	0.661872	-0.595375	1
ILMN_3236756	ACSF2	80221				0.612093	-0.708176	0.0808556	0.720143	-0.473644	0.195562	0.958893	-0.0605575	0.723932	1.12816	0.173974	0.459543
ILMN_1716832	ACSF3	197322	0.944747	-0.082	0.654769	0.919959	-0.120358	0.382733	0.790352	-0.339433	0.139087	0.892699	-0.163754	0.723932	0.766932	-0.382829	0.195562
ILMN_1684585	ACSL1	2180	0.997231	-0.004	0.98492	0.970837	-0.0426987	0.382733	0.774672	-0.368342	0.0419616	1.00104	0.00150592	0.658843	0.798776	-0.324137	0.0644577
ILMN_2360705	ACSL3	2181	1.94531	0.96	0	0.95277	-0.0698004	0.662521	0.788923	-0.342044	0.459543	0.93898	-0.0908335	0.0422601	0.780038	-0.358384	0.0960923
ILMN_2391458	ACSL4	2182	1.18427	0.244	0.052606	1.05807	0.0814332	0.698535	0.930288	-0.104251	0.846451	1.03509	0.0497597	0.834532	0.910086	-0.135925	0.561276
ILMN_2273911	ACSL5	51703	1.05482	0.077	0.648922										0.706555	-0.501126	0.371093
ILMN_1737418	ACSL6	23305	0.948027	-0.077	0.715302
ILMN_1657592	ACSM2B	348158	0.992404	-0.011	0.964903
ILMN_1685952	ACSM3	6296	0.988286	-0.017	0.94172	0.807049	-0.309272	0.382733	0.860155	-0.217331	0.288844	0.77767	-0.36277	0.105193	0.974656	-0.0370354	0.867632
ILMN_2070792	ACSM5	54988	0.998615	-0.002	0.993513
ILMN_1752269	ACSS1	84532	1.14552	0.196	0.21218	0.850322	-0.233919	1	0.774212	-0.369199	0.355226	0.975981	-0.035075	0.426777	0.888623	-0.170356	0.267257
ILMN_2336595	ACSS2	55902	0.847332	-0.239	0.271733	0.882555	-0.180242	0.19043	0.806682	-0.309928	0.0419616	0.8977	-0.155695	0.111961	0.877899	-0.187873	0.0265003
ILMN_1659885	ACSS3	79611	1.14711	0.198	0.170055							0.821291	-0.284035	0.245278	0.979344	-0.0301123	0.540291
ILMN_2125869	ACTA1	58										0.661929	-0.595252	0.487453
ILMN_1671703	ACTA2	59	0.610897	-0.711	0.001972	0.93881	-0.0910953	0.662521	0.842492	-0.247266	0.355226	0.890073	-0.168004	0.185326	0.798755	-0.324175	0.0644577
ILMN_1777296	ACTB	60	0.657927	-0.604	0.000626	0.91499	-0.128173	0.382733	0.808399	-0.306861	0.01623	0.881055	-0.182696	0.250998	0.758785	-0.398237	0.0644577
ILMN_1704961	ACTG1	71	0.621575	-0.686	0.000317	0.823717	-0.27978	0.0808556	0.720152	-0.473627	0.0265003	0.883397	-0.178866	0.0636898	0.885689	-0.175128	0.355226
ILMN_1795325	ACTG2	72	0.237007	-2.077	0
ILMN_2328280	ACTL6A	86	1.1599	0.214	0.233262	0.982775	-0.0250666	0.662521	0.780692	-0.357175	0.195562	0.81965	-0.286919	0.596242	0.778061	-0.362045	0.139087
ILMN_1657855	ACTL6B	51412							1.20871	0.273465	1	0.884071	-0.177765	1
ILMN_1704078	ACTL8	81569	0.963262	-0.054	0.775547
ILMN_2232177	ACTN1	87	0.541488	-0.885	3e-06	0.776159	-0.365576	0.19043	0.705544	-0.503191	0.0960923	0.897586	-0.155878	0.157704	0.815924	-0.293493	0.0644577
ILMN_1665691	ACTN3	89	1.08448	0.117	0.522288
ILMN_1725534	ACTN4	81	0.736113	-0.442	0.001674	0.710549	-0.492994	0.0808556	0.682305	-0.551511	0.01623	1.01731	0.0247642	0.426777	0.976876	-0.0337528	1
ILMN_1798254	ACTR10	55860	0.81169	-0.301	0.05154	1.01067	0.0153137	1	1.0569	0.0798359	0.711531	0.853929	-0.227812	0.157704	0.892987	-0.163289	0.139087
ILMN_1792314	ACTR1A	10121	0.744839	-0.425	0.000499	0.907557	-0.13994	0.0808556	0.898265	-0.154788	0.0265003	0.881228	-0.182413	0.331387	0.872205	-0.197262	0.0960923
ILMN_1695821	ACTR1B	10120	0.88454	-0.177	0.393545	0.92021	-0.119964	0.382733	0.783817	-0.351411	0.0419616	0.905338	-0.143472	0.216373	0.771149	-0.374919	0.0644577
ILMN_2388605	ACTR2	10097	1.0367	0.052	0.795687	0.906489	-0.141639	0.662521	0.895165	-0.159774	0.5791	0.805045	-0.31286	0.216373	0.794988	-0.330994	0.195562
ILMN_1657153	ACTR3	10096	0.661127	-0.597	0.0002	1.06187	0.0866071	0.382733	0.880787	-0.183135	0.5791	0.870337	-0.200355	0.250998	0.721916	-0.470097	0.0644577
ILMN_2260392	ACTR3B	57180	1.24229	0.313	0.037119	0.69443	-0.526099	0.662521	0.596337	-0.745801	0.0960923	0.767074	-0.382562	0.060602	0.678794	-0.558954	0.0419616
ILMN_1652594	ACTR5	79913	1.13524	0.183	0.151343	0.92506	-0.112382	1	0.885265	-0.175818	0.459543	0.861776	-0.214615	0.377225	0.824704	-0.278052	0.459543
ILMN_1697585	ACTR6	64431	1.09733	0.134	0.363887	1.06033	0.0845138	1	0.987662	-0.017911	0.5791	0.876675	-0.189885	0.331387	0.816593	-0.29231	0.139087
ILMN_1689162	ACTR8	93973	1.12428	0.169	0.224529	1.24899	0.320758	0.662521	0.971071	-0.0423516	0.5791	0.888529	-0.17051	0.859819	0.690819	-0.53362	0.267257
ILMN_1815392	ACTRT1	139741	0.804408	-0.314	0.058799	0.618106	-0.694073	0.19043	0.684778	-0.546291	0.267257	0.78246	-0.353911	0.0520588	0.86686	-0.206129	0.459543
ILMN_1760490	ACVR1	90	0.959264	-0.06	0.721745	0.984938	-0.0218955	1	0.912368	-0.132313	0.711531	0.996602	-0.00491126	0.791082	0.923172	-0.115328	0.355226
ILMN_1786544	ACVR1B	91	1.11729	0.16	0.216966	0.861804	-0.214568	0.19043	0.97775	-0.0324632	0.853307	0.879956	-0.184496	0.250998	0.998344	-0.00239185	1
ILMN_2152711	ACVR2A	92	1.16393	0.219	0.174874	1.20717	0.271634	0.698535	1.11314	0.154638	0.896125	0.67194	-0.573596	0.0322773	0.619599	-0.690592	0.107347
ILMN_1807493	ACVRL1	94	0.746907	-0.421	0.032108
ILMN_1683883	ACY1	95	0.903127	-0.147	0.527653	0.807713	-0.308086	0.662521	0.754716	-0.405994	0.01623	0.888333	-0.170827	0.331387	0.830047	-0.268736	0.0265003
ILMN_1694233	ACYP1	97	1.03097	0.044	0.840661	0.966623	-0.0489744	0.382733	1.23594	0.305611	0.355226	0.86853	-0.203352	0.185326	0.940818	-0.0880118	0.459543
ILMN_1697550	ACYP2	98	0.816769	-0.292	0.021145	0.866685	-0.206421	0.662521	0.942616	-0.0852587	0.518605	0.928984	-0.106275	0.250998	0.782613	-0.353629	0.245278
ILMN_1803686	ADA	100	0.901875	-0.149	0.372654	0.70355	-0.507276	0.0808556	0.634423	-0.656482	0.0265003	0.797208	-0.326972	0.426777	0.718879	-0.476178	0.0419616
ILMN_1725043	ADAL	161823	0.981459	-0.027	0.887415	0.981836	-0.0264459	1	0.924753	-0.11286	0.853307	0.875413	-0.191964	0.859819	0.824518	-0.278378	0.195562
ILMN_1718946	ADAM10	102	0.906262	-0.142	0.357032	1.27488	0.350357	0.662521	0.904639	-0.144586	0.267257	0.97671	-0.0339975	0.596242	0.850792	-0.233122	0.0644577
ILMN_1726266	ADAM12	8038	1.16635	0.222	0.10574							0.763119	-0.390021	0.111612
ILMN_1751500	ADAM15	8751	1.09962	0.137	0.292934	0.784175	-0.350753	0.0808556	0.824674	-0.278103	0.0644577	0.926706	-0.109816	0.216373	0.859497	-0.218435	0.0644577
ILMN_1765779	ADAM17	6868	0.95	-0.074	0.700158	0.882681	-0.180037	0.19043	1.23806	0.308076	0.187683	0.784609	-0.349955	0.0184162	0.805674	-0.311732	0.245278
ILMN_1713751	ADAM19	8728	0.388773	-1.363	0
ILMN_1662675	ADAM2	2515	0.963262	-0.054	0.783201							0.845617	-0.241924	0.698535
ILMN_1812112	ADAM21	8747	1.08147	0.113	0.422434
ILMN_2060086	ADAM23	8745	0.759436	-0.397	0.041442
ILMN_1664631	ADAM28	10863	1.10496	0.144	0.347719
ILMN_2194158	ADAM29	11086	1.01255	0.018	0.925505
ILMN_1806841	ADAM32	203102	1.11497	0.157	0.289942
ILMN_1671297	ADAM33	80332	0.972655	-0.04	0.829587
ILMN_2223911	ADAM3A	1587	1.03814	0.054	0.792217
ILMN_2143210	ADAM6	8755	1.07773	0.108	0.536215
ILMN_1750294	ADAM7	8756	1.08673	0.12	0.484588
ILMN_1727524	ADAM9	8754	0.935624	-0.096	0.625237	1.22489	0.292654	0.662521	1.35202	0.435121	0.711531	0.831224	-0.26669	0.0636898	0.917498	-0.124224	0.459543
ILMN_1673566	ADAMTS1	9510	0.720465	-0.473	0.043498
ILMN_2413732	ADAMTS13	11093	0.967276	-0.048	0.781472
ILMN_1873412	ADAMTS14	140766	0.99103	-0.013	0.958726
ILMN_1683781	ADAMTS15	170689	1.10957	0.15	0.323332
ILMN_1726247	ADAMTS16	170690	1.1088	0.149	0.369696
ILMN_1682989	ADAMTS17	170691	1.0203	0.029	0.903078
ILMN_1739872	ADAMTS18	170692	0.956608	-0.064	0.741351
ILMN_1796628	ADAMTS2	9509	0.966606	-0.049	0.796645										0.646437	-0.629418	1
ILMN_1651717	ADAMTS20	80070	0.894405	-0.161	0.39233
ILMN_2092933	ADAMTS4	9507				0.356241	-1.48907	0.371093	0.56104	-0.833824	0.2113	0.700063	-0.514443	0.0137108	1.10252	0.140807	0.550985
ILMN_1681886	ADAMTS5	11096	1.23628	0.306	0.009998
ILMN_1767362	ADAMTS6	11174	1.02527	0.036	0.855028
ILMN_2211790	ADAMTS7	11173	0.899378	-0.153	0.404937
ILMN_1672403	ADAMTS8	11095	1.06659	0.093	0.54358							0.992838	-0.0103696	0.540291
ILMN_1805543	ADAMTS9	56999	1.30767	0.387	0.003533
ILMN_1684919	ADAMTSL1	92949	0.921464	-0.118	0.535405
ILMN_1798690	ADAMTSL3	57188	1.20497	0.269	0.063542	0.843191	-0.246069	0.245278	0.980315	-0.0286827	0.883617	0.869509	-0.201727	0.432035	1.01091	0.0156597	0.867632
ILMN_1687035	ADAMTSL4	54507	0.682074	-0.552	1.3e-05	0.76243	-0.391324	1	1.06151	0.0861149	0.918707	0.837907	-0.255138	0.531667	1.16659	0.222301	0.711531
ILMN_1793040	ADAMTSL5	339366	1.04972	0.07	0.717806	0.847294	-0.239066	0.19043	0.909321	-0.137138	0.355226	0.974695	-0.0369772	0.536499	1.04605	0.0649509	0.853307
ILMN_3247424	ADAP1	11033				0.824823	-0.277844	0.382733	0.916981	-0.125036	0.267257	0.826055	-0.27569	0.859819	0.918351	-0.122882	0.853307
ILMN_1763000	ADAP2	55803	0.716481	-0.481	2.1e-05	1.03159	0.0448684	1	0.909167	-0.137383	0.195562	0.990967	-0.0130916	1	0.873365	-0.195343	0.139087
ILMN_2320964	ADAR	103	1.15829	0.212	0.564363	0.80249	-0.317445	0.0808556	0.83957	-0.252277	0.139087	0.807244	-0.308923	0.250998	0.844545	-0.243755	0.355226
ILMN_2319326	ADARB1	104	1.12428	0.169	0.371261	0.549977	-0.862557	0.0808556	0.558236	-0.841052	0.0320887	0.791912	-0.336589	0.216373	0.994591	-0.00782517	0.5791
ILMN_1657139	ADAT1	23536				1.02086	0.0297809	1	0.687857	-0.539819	0.195562	1.05771	0.0809418	1	0.712688	-0.488658	0.0419616
ILMN_3245693	ADAT2	134637				1.19411	0.25593	1	1.22688	0.294997	0.540291
ILMN_1806275	ADAT3	113179	1.09581	0.132	0.279118	0.800877	-0.320347	0.662521	1.10147	0.139437	0.459543	0.83737	-0.256062	0.157704	1.15166	0.203721	0.711531
ILMN_1659599	ADC	NA	1.01889	0.027	0.89424
ILMN_1698777	ADCK1	57143	1.00278	0.004	0.984928	1.02957	0.0420463	1	0.69604	-0.522759	0.01623	0.906428	-0.141735	0.250998	0.612788	-0.70654	0.0265003
ILMN_1663132	ADCK2	90956	0.874785	-0.193	0.255132	0.839351	-0.252654	0.382733	0.724334	-0.465273	0.0644577	0.95266	-0.0699661	0.250998	0.822117	-0.282585	0.0265003
ILMN_1700349	ADCK4	NA	1.03455	0.049	0.827746	0.888804	-0.170063	0.382733	0.766212	-0.384184	0.0644577	1.07943	0.110271	0.658843	0.930547	-0.10385	0.5791
ILMN_1761309	ADCK5	203054	1.00765	0.011	0.963322	0.779681	-0.359045	0.662521	0.791599	-0.337158	0.195562	0.958792	-0.0607102	0.885234	0.973448	-0.0388235	0.609834
ILMN_2120555	ADCY1	107							1.58733	0.666598	1
ILMN_1676893	ADCY3	109	0.827597	-0.273	0.021419	0.97588	-0.0352244	0.662521	0.730609	-0.452828	0.01623	0.960489	-0.0581592	0.426777	0.719086	-0.475763	0.01623
ILMN_1708588	ADCY5	111	0.849685	-0.235	0.08476
ILMN_1685156	ADCY6	112	0.852635	-0.23	0.202137	0.955214	-0.0661049	0.382733	0.810758	-0.302656	0.0419616	0.853873	-0.227906	0.185326	0.767132	-0.382453	0.01623
ILMN_1655935	ADCY7	113	0.986916	-0.019	0.929117	0.912448	-0.132186	0.77283	0.80173	-0.318811	0.366157	1.15041	0.202154	0.897279	1.01082	0.0155292	0.77283
ILMN_1754440	ADCY8	114	1.12584	0.171	0.212044
ILMN_1654287	ADCY9	115	0.761017	-0.394	0.035836	0.758712	-0.398376	0.0808556	0.712091	-0.489865	0.0419616	0.867001	-0.205894	0.157704	0.813727	-0.297384	0.01623
ILMN_2356786	ADD1	118	0.903753	-0.146	0.423136	0.897848	-0.155458	0.662521	0.788185	-0.343394	0.139087	0.855307	-0.225486	0.157704	0.726324	-0.461315	0.0265003
ILMN_1694133	ADD2	119	1.00835	0.012	0.96029
ILMN_2311278	ADD3	120	0.810003	-0.304	0.01797	0.904274	-0.145168	0.19043	0.785118	-0.349019	0.0960923	0.784506	-0.350144	0.118212	0.659358	-0.600867	0.0226545
ILMN_1764309	ADH1A	124	1.07029	0.098	0.662329
ILMN_1740717	ADH1C	126	0.900626	-0.151	0.368129
ILMN_1738604	ADH5	128	0.940826	-0.088	0.631103	0.848415	-0.237158	0.662521	0.787661	-0.344353	0.267257	0.82735	-0.27343	0.596242	0.768105	-0.380625	0.195562
ILMN_1691175	ADH6	130	1.11961	0.163	0.354746
ILMN_1702858	ADHFE1	137872	0.865737	-0.208	0.0918	0.860292	-0.217101	0.0808556	0.89825	-0.154811	0.195562	0.889673	-0.168654	0.185326	0.82393	-0.279406	0.0960923
ILMN_1813975	ADI1	55256	0.951978	-0.071	0.790681	0.832627	-0.264258	0.382733	0.770995	-0.375206	0.139087	1.08908	0.123109	0.929637	1.00846	0.0121608	0.711531
ILMN_1775045	ADIPOQ	9370				0.849586	-0.235168	0.698535	0.748975	-0.41701	0.305507	1.04001	0.0565916	0.898327	0.916845	-0.12525	0.883617
ILMN_1688322	ADIPOR1	51094	1.03814	0.054	0.833242	1.11736	0.160099	0.662521	0.910142	-0.135837	0.459543	0.882828	-0.179795	0.157704	0.863916	-0.211037	0.195562
ILMN_2224833	ADIPOR2	79602	1.8	0.848	0	0.862967	-0.212623	0.19043	0.821219	-0.28416	0.0644577	0.897375	-0.156218	0.111961	0.853963	-0.227755	0.01623
ILMN_2358626	ADK	132	0.833353	-0.263	0.043399	0.947326	-0.0780669	0.19043	0.830123	-0.268603	0.01623	0.847659	-0.238445	0.216373	0.725493	-0.462966	0.0644577
ILMN_1708934	ADM	133	0.710054	-0.494	0.004419	1.09471	0.13055	0.662521	1.06946	0.0968828	1	1.01457	0.0208621	0.596242	0.991164	-0.0128047	0.711531
ILMN_1702933	ADM2	79924				0.69095	-0.533347	0.0808556	0.931282	-0.10271	1	0.960155	-0.0586602	0.377225	1.29412	0.371976	0.139087
ILMN_1657993	ADNP	23394	1.18427	0.244	0.081074	1.08079	0.112092	1	0.885037	-0.17619	0.5791	0.783582	-0.351844	0.185326	0.836583	-0.25742	0.195562
ILMN_2080751	ADNP2	22850	1.02669	0.038	0.829543	0.879048	-0.185987	0.382733	0.7779	-0.362344	0.195562	1.02034	0.0290461	1	0.902932	-0.147311	0.267257
ILMN_1690352	ADO	84890	1.39281	0.478	0.00021	1.27154	0.346573	0.19043	0.798413	-0.324792	0.139087	1.0407	0.0575611	0.859819	0.653471	-0.613804	0.01623
ILMN_1747227	ADORA1	134	1.01677	0.024	0.91475	0.985897	-0.0204915	1	0.989725	-0.0148999	1	0.869889	-0.201097	0.250998	0.873267	-0.195505	0.139087
ILMN_1807372	ADORA2A	135				1.16136	0.215817	1	1.06186	0.0865883	0.711531	0.824328	-0.278709	0.289315	0.7537	-0.407938	0.267257
ILMN_1703946	ADORA2B	136	1.32225	0.403	0.00076
ILMN_1730710	ADORA3	140	0.99654	-0.005	0.981391
ILMN_1793959	ADPGK	83440	0.834509	-0.261	0.101089	0.851533	-0.231865	0.382733	0.869577	-0.201614	0.139087	0.924562	-0.113158	0.250998	0.944153	-0.0829066	0.355226
ILMN_1794512	ADPRH	141	1.06659	0.093	0.598021	1.07024	0.0979346	0.77283	0.878487	-0.186907	0.550985	0.897409	-0.156163	0.332922	0.736622	-0.441004	0.245278
ILMN_1788530	ADPRHL1	113622	0.943438	-0.084	0.63104	0.723637	-0.466663	0.19043	0.742598	-0.429347	0.139087	0.887842	-0.171625	0.426777	0.983994	-0.0232786	1
ILMN_1811480	ADPRHL2	54936	0.836826	-0.257	0.175085	0.845806	-0.241601	0.662521	1.0066	0.00948821	0.5791	0.920136	-0.120081	0.929637	1.09506	0.131009	0.5791
ILMN_1780551	ADRA1A	148	1.03958	0.056	0.829543	1.54332	0.62604	1	1.24095	0.311444	0.558185	0.945777	-0.0804286	0.846451	0.760476	-0.395025	0.540291
ILMN_1679754	ADRA1B	147	0.903753	-0.146	0.424196
ILMN_1716421	ADRA1D	146				0.900221	-0.151649	0.540291	0.779038	-0.360235	0.105193	0.91027	-0.135633	0.105193	0.787734	-0.344219	0.540291
ILMN_1659371	ADRA2A	150	0.853226	-0.229	0.077093	0.95275	-0.0698311	0.382733	0.74462	-0.425424	0.195562	0.997504	-0.00360491	0.658843	0.779598	-0.359198	0.195562
ILMN_1677868	ADRA2B	151	1.00696	0.01	0.96667	1.07212	0.100468	1	1.17427	0.231765	0.853307	0.982227	-0.025872	0.809894	1.07581	0.105425	0.918707
ILMN_1733963	ADRA2C	152	1.01537	0.022	0.896534	0.847947	-0.237953	0.698535	0.86068	-0.216451	0.332922	1.18971	0.250609	0.558185	1.20757	0.272111	0.540291
ILMN_1804255	ADRB1	153	0.888227	-0.171	0.249446				0.942578	-0.085316	1	0.759957	-0.396011	1
ILMN_1695590	ADRB2	154	0.940826	-0.088	0.586721	1.19043	0.251479	1	1.77136	0.824858	0.540291	0.800636	-0.320781	0.695299	1.19135	0.252599	0.759463
ILMN_3307926	ADRBK1	NA	0.77271	-0.372	0.002681	0.819701	-0.286831	0.0808556	0.786126	-0.347167	0.0419616	0.995399	-0.00665378	0.658843	0.954627	-0.0669902	0.459543
ILMN_1668900	ADRBK2	NA
ILMN_1760143	ADRM1	11047	1.33607	0.418	0.000164	0.768988	-0.378967	0.662521	0.799551	-0.322737	0.355226	1.02308	0.0329156	0.791082	1.06374	0.0891453	0.5791
ILMN_1790757	ADSL	158	0.949342	-0.075	0.614114	0.83834	-0.254393	1	0.809727	-0.304492	0.139087	0.880921	-0.182915	0.536499	0.850855	-0.233015	0.195562
ILMN_2092664	ADSS	NA	1.26927	0.344	0.110937	1.13201	0.178892	0.382733	0.908113	-0.139057	0.355226	0.902262	-0.148383	0.536499	0.715344	-0.483292	0.139087
ILMN_2240009	ADSSL1	NA	1.11497	0.157	0.307436	1.161	0.215367	0.662521	0.707766	-0.498656	0.0644577	1.06924	0.0965914	0.536499	0.651831	-0.617431	0.0644577
ILMN_1736178	AEBP1	165	0.586418	-0.77	0.000882
ILMN_1803376	AEBP2	121536	1.16716	0.223	0.130364	0.893602	-0.162295	0.0808556	0.977428	-0.0329382	0.5791	0.84808	-0.237728	0.0422601	0.927635	-0.108371	0.5791
ILMN_3240321	AEN	64782	1.64947	0.722	4e-06	0.992122	-0.0114103	1	1.21238	0.277843	0.459543	0.942623	-0.0852472	0.859819	1.15189	0.204006	0.139087
ILMN_2333107	AES	NA	1.07549	0.105	0.603705	0.840541	-0.250609	0.19043	0.799617	-0.322619	0.0265003	0.884495	-0.177074	0.0773886	0.84143	-0.249085	0.0265003
ILMN_1701998	AFAP1	60312	0.955283	-0.066	0.662329	0.940325	-0.0887692	0.662521	0.941137	-0.087524	0.595883	0.91186	-0.133116	0.595883	0.912647	-0.131871	0.19043
ILMN_1730995	AFAP1L2	84632	1.02954	0.042	0.814
ILMN_1702696	AFAR3	NA				0.981029	-0.0276318	0.77283	1.06518	0.0910909	0.846451	0.95234	-0.0704509	0.927264	1.03403	0.0482718	0.897279
ILMN_1673119	AFF1	4299	0.91955	-0.121	0.49836	0.907029	-0.14078	0.662521	0.946036	-0.0800322	0.459543	0.740908	-0.432633	0.0385612	0.772772	-0.371885	0.082731
ILMN_1775235	AFF3	3899	0.974004	-0.038	0.865374	1.05061	0.071226	1	0.826527	-0.274867	0.0265003	0.911193	-0.134171	0.216373	0.716846	-0.480264	0.01623
ILMN_1708502	AFF4	27125	1.33978	0.422	0.012741	0.829707	-0.269327	1	0.803811	-0.315072	1	0.774099	-0.36941	0.185326	0.749938	-0.415156	0.195562
ILMN_1705447	AFG3L1	NA	1.0629	0.088	0.599617	0.846534	-0.240361	0.662521	1.37086	0.455085	0.540291	0.885181	-0.175956	0.426777	0.993661	-0.00917395	0.711531
ILMN_2066124	AFG3L2	10939	1.38415	0.469	0.000502	0.888691	-0.170246	0.662521	0.762618	-0.390967	0.195562	0.911758	-0.133277	0.479929	0.782412	-0.353999	0.0960923
ILMN_1707551	AFMID	125061	1.05702	0.08	0.721856	1.65878	0.730124	0.662521	0.772942	-0.371567	0.267257	0.833278	-0.263131	0.0520588	0.765157	-0.386172	0.01623
ILMN_1782204	AFP	174	0.987601	-0.018	0.943653
ILMN_2402766	AFTPH	54812	1.22689	0.295	0.031802	0.852433	-0.230341	0.662521	0.771713	-0.373864	0.139087	0.946128	-0.0798935	0.289315	0.667421	-0.583331	0.0265003
ILMN_1802631	AGA	175	0.833353	-0.263	0.07556	1.03518	0.0498748	0.662521	1.03592	0.0509189	1	0.941178	-0.0874606	0.479929	0.941859	-0.0864165	0.853307
ILMN_2245223	AGAP1	116987	1.07923	0.11	0.554069
ILMN_2362126	AGAP3	116988	1.04608	0.065	0.720071	0.920002	-0.120292	1	0.789789	-0.34046	0.195562	1.00458	0.00659045	0.929637	0.862396	-0.213578	0.267257
ILMN_3239130	AGAP6	414189	1.04972	0.07	0.675735	0.893107	-0.163094	0.662521	1.14887	0.200215	0.5791	0.942305	-0.0857344	0.723932	1.21216	0.277575	0.267257
ILMN_2120103	AGAP7	NA	1.04391	0.062	0.766609				1.02749	0.0391255	1	0.697432	-0.519876	1
ILMN_3242883	AGAP8	NA	1.04247	0.06	0.744804	0.757885	-0.39995	0.662521	1.08584	0.11881	0.195562	0.859241	-0.218866	0.289315	1.23105	0.299894	0.711531
ILMN_1887648	AGBL1	123624										0.989944	-0.0145813	1	1.79247	0.84195	1
ILMN_1688627	AGBL2	79841	0.959929	-0.059	0.755445
ILMN_2290776	AGBL5	60509	1.17446	0.232	0.081167	0.833647	-0.262491	0.0808556	0.776982	-0.364046	0.0644577	0.947267	-0.0781578	0.377225	0.707428	-0.499344	0.139087
ILMN_2257015	AGER	177	1.10267	0.141	0.373215							0.678099	-0.560433	0.540291
ILMN_3260345	AGFG1	3267	1.4651	0.551	0.000513	1.47841	0.564049	0.77283	0.640473	-0.64279	0.01623	0.826032	-0.275731	0.143852	0.530273	-0.915192	0.0265003
ILMN_1652023	AGFG2	3268	0.906262	-0.142	0.245714	1.086	0.119021	0.662521	1.06977	0.0973014	0.5791	0.875715	-0.191466	0.331387	0.86263	-0.213185	0.267257
ILMN_1776153	AGGF1	55109	0.872363	-0.197	0.196516	0.871459	-0.198495	0.0808556	0.912652	-0.131864	0.195562	0.920837	-0.118982	0.331387	0.893954	-0.161728	0.355226
ILMN_1772645	AGK	55750				0.950022	-0.0739676	0.662521	0.854163	-0.227417	0.0644577	0.84761	-0.238527	0.723932	0.762085	-0.391976	0.0960923
ILMN_1680343	AGL	178	1.05044	0.071	0.724281	1.23776	0.307734	1	0.818216	-0.289446	0.0419616	0.951757	-0.0713355	0.289315	0.816249	-0.292919	0.0419616
ILMN_1679520	AGPAT1	10554	0.949342	-0.075	0.749384	0.860719	-0.216386	0.0808556	0.768446	-0.379984	0.01623	0.909078	-0.137524	0.289315	0.811621	-0.301123	0.0960923
ILMN_2377430	AGPAT2	10555	0.950659	-0.073	0.683201	0.820148	-0.286044	0.0808556	0.664541	-0.589569	0.0265003	0.883672	-0.178416	0.331387	1.07944	0.110286	0.0960923
ILMN_1654010	AGPAT3	56894	1.08523	0.118	0.544652	0.537858	-0.894703	0.19043	0.54601	-0.873001	0.17146	0.922898	-0.115757	0.617075	0.936885	-0.094056	0.897279
ILMN_1730504	AGPAT4	56895	1.12584	0.171	0.271472				0.73025	-0.453538	1
ILMN_1662049	AGPAT5	55326	1.41519	0.501	0.000477	1.00753	0.0108202	1	0.913953	-0.129809	0.267257	0.910941	-0.134571	0.791082	0.826336	-0.2752	0.853307
ILMN_1740752	AGPAT6	NA	1.03886	0.055	0.798391	1.01504	0.0215311	0.662521	0.819441	-0.287287	0.5791	0.952156	-0.0707308	0.658843	0.768678	-0.379549	0.0644577
ILMN_1794875	AGPAT9	NA	1.30767	0.387	0.001186	0.721791	-0.470348	0.540291	0.913948	-0.129817	0.802587	0.788496	-0.342825	0.106583	0.998411	-0.002294	0.896125
ILMN_1698209	AGPS	8540	1.10803	0.148	0.440447				1.00227	0.00326675	1	0.87223	-0.197219	1
ILMN_1814151	AGR2	10551	1.08147	0.113	0.595663	0.810271	-0.303524	0.662521	0.944357	-0.082595	0.195562	0.938275	-0.0919173	0.596242	0.789836	-0.340376	0.0960923
ILMN_1728787	AGR3	155465	0.859161	-0.219	0.118729	1.14607	0.196699	1	0.677426	-0.561864	0.267257	0.874032	-0.194242	0.596242	0.664949	-0.588684	0.0644577
ILMN_1770454	AGRN	375790	0.74072	-0.433	0.100913	0.801576	-0.319088	0.19043	0.752088	-0.411027	0.0265003	0.891349	-0.165938	0.0933977	0.836318	-0.257877	0.195562
ILMN_1813530	AGT	183	0.836826	-0.257	0.03211
ILMN_1718071	AGTPBP1	23287	1.00486	0.007	0.973393	0.995559	-0.0064208	1	0.726683	-0.460601	0.0960923	1.0398	0.0563115	0.859819	0.758979	-0.397869	0.195562
ILMN_2341343	AGTR1	185	1.03168	0.045	0.790687							0.776518	-0.364908	0.136037
ILMN_1802458	AGTRAP	57085	0.762601	-0.391	0.008742	0.863805	-0.211223	0.0808556	0.815563	-0.294132	0.01623	0.812683	-0.299235	0.185326	0.744639	-0.425386	0.139087
ILMN_1709796	AGXT	189	1.06511	0.091	0.533175
ILMN_1757807	AGXT2L1	NA	0.936272	-0.095	0.576774
ILMN_1673529	AGXT2L2	NA	0.846745	-0.24	0.085648	1.03996	0.0565267	1	0.958376	-0.0613359	0.711531	1.003	0.00432802	0.723932	0.924321	-0.113535	0.711531
ILMN_1809139	AHCTF1	25909	1.31859	0.399	0.004869	0.866634	-0.206505	0.382733	0.882901	-0.179677	0.459543	0.842482	-0.247282	0.216373	0.749899	-0.415232	0.0419616
ILMN_1657862	AHCY	191	1.18509	0.245	0.055309	0.854356	-0.227091	0.19043	0.73536	-0.443477	0.0644577	0.914984	-0.128182	0.658843	0.787544	-0.344568	0.139087
ILMN_1770412	AHCYL1	10768	0.844401	-0.244	0.08641	0.89578	-0.158784	1	0.876068	-0.190885	0.139087	0.889491	-0.168948	0.377225	0.869918	-0.201049	0.0644577
ILMN_1712786	AHCYL2	23382	1.16312	0.218	0.086385	0.853237	-0.228982	0.662521	0.951009	-0.0724687	0.759463	0.639357	-0.645307	0.0813611	0.712621	-0.488793	0.15558
ILMN_1680111	AHDC1	27245	0.900002	-0.152	0.241484
ILMN_1791006	AHI1	54806	1.16635	0.222	0.183393	0.85985	-0.217844	1	0.808865	-0.30603	0.366157	0.937541	-0.0930467	0.810181	0.881949	-0.181232	0.366157
ILMN_1714567	AHNAK	79026	0.772175	-0.373	0.013075	0.789056	-0.341801	0.382733	0.5746	-0.799369	0.0419616	0.791547	-0.337253	0.0520588	0.682826	-0.550409	0.0419616
ILMN_3243156	AHNAK2	113146	1.06142	0.086	0.692367	0.640869	-0.641898	0.0808556	0.731357	-0.451352	0.0960923	0.690808	-0.533644	0.0134187	0.788347	-0.343098	0.195562
ILMN_2162799	AHR	196	1.428	0.514	9.6e-05	0.90182	-0.149088	0.19043	0.941567	-0.0868638	0.267257	0.913732	-0.130158	0.859819	1.36373	0.447557	0.5791
ILMN_1703617	AHSA1	10598	1.36037	0.444	0.006519	0.981981	-0.0262338	0.662521	1.00601	0.00864035	0.5791	0.998262	-0.00250986	1	1.02269	0.0323643	0.853307
ILMN_1798308	AHSA2	NA	1.08298	0.115	0.536215	0.879423	-0.185371	0.382733	0.877894	-0.187882	0.459543	0.77031	-0.376488	0.216373	0.768971	-0.378999	0.195562
ILMN_1696512	AHSP	51327	0.993093	-0.01	0.966718	0.952407	-0.0703499	0.662521	1.04886	0.0688197	1	0.882648	-0.180089	0.224313	0.972035	-0.0409197	0.759463
ILMN_2164164	AICDA	57379	0.980779	-0.028	0.886341
ILMN_3240117	AIDA	64853	0.874179	-0.194	0.324035	1.03465	0.0491398	1	0.912587	-0.131966	0.355226	1.02172	0.0309971	0.658843	0.901182	-0.150109	0.0960923
ILMN_1792473	AIF1	199	1.11574	0.158	0.384508	1.07615	0.105884	1	1.157	0.210388	0.558185	0.678634	-0.559295	0.0485396	0.610346	-0.7123	0.0960923
ILMN_3246401	AIF1L	83543	0.961928	-0.056	0.750103	0.88246	-0.180396	0.382733	0.739976	-0.43445	0.0265003	1.03385	0.048025	0.658843	0.86692	-0.206029	0.01623
ILMN_2313821	AIFM1	9131	1.19168	0.253	0.119603	0.965391	-0.0508154	0.0808556	0.882085	-0.181011	0.0265003	0.820149	-0.286042	0.235333	0.759388	-0.397091	0.0419616
ILMN_1712639	AIFM2	84883	1.01466	0.021	0.92965
ILMN_1704173	AIFM3	150209	1.03383	0.048	0.784422	1.59215	0.670976	0.148915	1.27889	0.35489	0.239985	0.903848	-0.145849	0.372029	0.726012	-0.461935	0.125786
ILMN_1797974	AIG1	51390	0.736624	-0.441	0.001594	0.934553	-0.0976512	1	0.864906	-0.209385	0.195562	0.90676	-0.141207	0.185326	0.839184	-0.252941	0.0419616
ILMN_1688625	AIM1	NA	1.06216	0.087	0.63215	0.992484	-0.0108845	0.382733	0.748044	-0.418805	0.01623	0.853256	-0.22895	1	0.643106	-0.636871	0.195562
ILMN_3307874	AIM1L	NA				0.796092	-0.328993	0.19043	0.910731	-0.134903	0.459543	0.854832	-0.226288	0.331387	0.753167	-0.408958	0.261572
ILMN_1681301	AIM2	9447	1.13839	0.187	0.24077	0.759493	-0.396892	1	0.709076	-0.495988	0.111612	1.06132	0.0858661	0.859684	0.990872	-0.0132297	1
ILMN_1673252	AIMP2	7965	1.66671	0.737	0	0.918611	-0.122473	0.662521	0.856498	-0.223478	0.5791	0.955449	-0.0657491	0.250998	0.890845	-0.166753	0.459543
ILMN_2103841	AIP	9049	1.15029	0.202	0.129778	0.81383	-0.297201	0.0808556	0.895239	-0.159656	0.459543	0.929612	-0.1053	0.536499	1.0226	0.0322446	0.5791
ILMN_2368268	AIPL1	23746	1.01819	0.026	0.900048
ILMN_1791236	AIRE	326	1.14552	0.196	0.161961	0.895913	-0.158569	0.382733	0.995965	-0.00583301	1	0.942205	-0.0858868	0.596242	1.04743	0.066849	0.711531
ILMN_2312764	AJAP1	55966	1.04174	0.059	0.781912	0.770787	-0.375595	0.77283	0.893376	-0.162661	0.404657	0.933766	-0.0988672	0.595883	1.08228	0.114067	0.853307
ILMN_1779965	AK1	203				0.93797	-0.0923866	0.382733	0.813812	-0.297232	0.139087	0.871894	-0.197775	0.157704	0.756483	-0.40262	0.0644577
ILMN_1716053	AK2	204	1.30044	0.379	0.008148	0.986918	-0.0189981	0.662521	0.930044	-0.10463	0.139087	0.902561	-0.147903	0.157704	0.780426	-0.357667	0.267257
ILMN_3236458	AK2P2	339736				0.936077	-0.0953013	0.662521	0.819479	-0.287221	0.195562	0.852589	-0.230078	1	0.746391	-0.421997	0.195562
ILMN_1778173	AK3	50808	0.538493	-0.893	1e-06	1.02379	0.0339165	1	0.925075	-0.112359	0.711531	0.889365	-0.169152	0.157704	0.803613	-0.315428	0.0960923
ILMN_1764090	AK3L1	NA	0.912566	-0.132	0.45229	0.797549	-0.326356	0.0808556	0.670968	-0.575685	0.0265003	0.879178	-0.185773	0.0520588	0.762566	-0.391067	0.0265003
ILMN_1656593	AK5	26289	0.945402	-0.081	0.682318
ILMN_1712530	AKAP1	8165	1.15269	0.205	0.1511	1.09003	0.124366	0.19043	0.75896	-0.397905	0.355226	1.16673	0.222468	0.859819	0.812363	-0.299803	0.355226
ILMN_1718808	AKAP10	11216	1.11265	0.154	0.342813	0.938031	-0.092292	0.382733	0.987027	-0.0188385	0.711531	0.901933	-0.148907	0.289315	0.949044	-0.0754538	0.711531
ILMN_1693220	AKAP11	11215	1.08448	0.117	0.52647	1.28503	0.3618	1	0.789204	-0.34153	0.139087	0.766476	-0.383687	0.0636898	0.561132	-0.833588	0.0644577
ILMN_1686846	AKAP12	9590	1.09809	0.135	0.445825							0.936599	-0.0944961	0.765594	0.935637	-0.0959797	0.332922
ILMN_1709101	AKAP13	11214	0.975356	-0.036	0.881922	0.565526	-0.822334	0.245278	0.851178	-0.232467	0.195562	0.729509	-0.455003	0.377225	0.561001	-0.833924	0.243345
ILMN_1675507	AKAP2	NA	1.07923	0.11	0.472874
ILMN_2268556	AKAP4	8852	0.910039	-0.136	0.412377
ILMN_1733690	AKAP7	9465	1.05848	0.082	0.759645	1.04818	0.0678911	1	0.618433	-0.693311	0.0960923	1.04611	0.0650315	1	0.617208	-0.696171	0.0419616
ILMN_1741572	AKAP8	10270	1.25093	0.323	0.025151	0.881293	-0.182307	0.0808556	1.32286	0.403661	0.267257	0.93451	-0.0977181	0.596242	1.40274	0.48825	0.139087
ILMN_1768962	AKAP8L	26993	1.69466	0.761	5e-06	0.558641	-0.840006	0.0808556	0.832558	-0.264377	0.355226	0.929405	-0.105621	0.479929	1.38512	0.470009	0.139087
ILMN_2396691	AKAP9	10142	1.0629	0.088	0.668531	1.19282	0.254372	1	0.926986	-0.109381	1	0.873049	-0.195865	0.723674	0.678482	-0.559618	0.0518299
ILMN_1658337	AKIRIN1	79647	1.19831	0.261	0.146789	0.724798	-0.464348	0.382733	1.13379	0.181158	0.711531	1.03216	0.0456676	0.929637	1.10069	0.138409	0.5791
ILMN_2148847	AKIRIN2	55122	1.88688	0.916	0	0.883964	-0.177941	0.382733	0.88647	-0.173857	0.355226	0.896943	-0.156912	0.658843	0.899485	-0.152828	0.5791
ILMN_1770673	AKNA	80709	0.915099	-0.128	0.466091	0.84414	-0.244446	0.0808556	0.742846	-0.428864	0.195562	0.800729	-0.320614	0.13332	0.704645	-0.505032	0.195562
ILMN_2205785	AKNAD1	254268	0.993781	-0.009	0.969813				1.06973	0.0972447	1	0.989717	-0.0149123	0.859684
ILMN_1728047	AKR1A1	10327	0.859161	-0.219	0.101372	0.920695	-0.119206	0.662521	0.802691	-0.317083	0.01623	0.983726	-0.0236712	0.289315	0.813906	-0.297066	0.01623
ILMN_1701731	AKR1B1	231	0.610473	-0.712	0.003737	0.925585	-0.111562	0.382733	0.923381	-0.115003	0.267257	0.94722	-0.078229	0.596242	0.944963	-0.0816697	0.853307
ILMN_1672148	AKR1B10	57016	0.853226	-0.229	0.091205
ILMN_2412336	AKR1C2	1646	0.985549	-0.021	0.948226
ILMN_1713124	AKR1C3	8644	0.928517	-0.107	0.572448
ILMN_1668880	AKR1C4	1109	1.15269	0.205	0.114708
ILMN_1685803	AKR1CL1	NA	1.03742	0.053	0.758119
ILMN_2157277	AKR1D1	6718				0.928687	-0.106736	0.19043	1.05458	0.0766691	1	0.858139	-0.220718	0.250998	0.974469	-0.0373124	0.711531
ILMN_1694985	AKR1E2	83592										1.18045	0.239338	0.540291
ILMN_1677043	AKR7A2	8574	0.781328	-0.356	0.003342	0.894409	-0.160994	0.382733	0.730257	-0.453523	0.0419616	0.908863	-0.137865	0.157704	0.742059	-0.430394	0.0960923
ILMN_2145396	AKR7A3	22977	0.827597	-0.273	0.041095	0.892568	-0.163965	0.0808556	0.739684	-0.435019	0.01623	0.963331	-0.0538959	0.929637	0.798326	-0.32495	0.195562
ILMN_2388507	AKT1	207	0.762601	-0.391	0.015071	0.862154	-0.213982	0.0808556	0.777324	-0.363411	0.0419616	0.864673	-0.209774	0.377225	0.828321	-0.271739	0.139087
ILMN_1726906	AKT1S1	84335	1.11961	0.163	0.290767	1.01307	0.0187386	1	0.852738	-0.229826	0.267257	0.919652	-0.120839	0.531667	0.774102	-0.369404	0.609834
ILMN_1743347	AKT2	208	0.921464	-0.118	0.463901
ILMN_1733598	AKT3	10000	0.91067	-0.135	0.463901
ILMN_2377240	AKTIP	64400	0.7495	-0.416	0.00129	1.07014	0.0978041	0.662521	0.776517	-0.364911	0.0644577	0.900998	-0.150405	0.250998	0.737406	-0.439469	0.0265003
ILMN_2404657	ALAD	210				0.946941	-0.0786537	0.386476	0.814762	-0.29555	0.267257	0.8695	-0.201742	0.596641	0.835221	-0.259771	0.139087
ILMN_1700047	ALAS1	211	1.10267	0.141	0.34161	0.833214	-0.26324	0.540291	0.764747	-0.386946	0.267257	0.928393	-0.107192	0.411314	1.03121	0.0443378	0.711531
ILMN_2367126	ALAS2	212	0.944747	-0.082	0.66939	0.801933	-0.318445	1	0.687269	-0.541053	1
ILMN_1782939	ALB	213	0.998615	-0.002	0.994003	1.1633	0.21822	1	1.04266	0.0602637	0.5791	1.00266	0.00383334	0.723932	0.898678	-0.154123	0.853307
ILMN_1670870	ALCAM	214	0.816769	-0.292	0.06437	1.023	0.0328082	1	0.56535	-0.822783	0.0419616	1.06223	0.08709	1	0.587027	-0.768501	0.0644577
ILMN_2051381	ALDH16A1	126133	1.02101	0.03	0.878695	0.804702	-0.313473	0.382733	0.824957	-0.277609	0.0960923	0.994403	-0.00809766	0.377225	1.01943	0.027766	0.853307
ILMN_2302716	ALDH18A1	5832	0.82245	-0.282	0.060461	0.821605	-0.283484	0.0808556	0.862537	-0.213341	0.01623	0.970594	-0.0430608	0.216373	1.01895	0.0270815	0.853307
ILMN_1709348	ALDH1A1	216				0.671455	-0.574638	0.540291	0.648387	-0.625073	0.0570399	1.02321	0.0330994	0.52445	0.988056	-0.0173359	0.846451
ILMN_1748538	ALDH1A2	8854	0.870551	-0.2	0.056138							1.08694	0.120276	1
ILMN_2139970	ALDH1A3	220				1.07976	0.110712	0.662521	1.06511	0.0909969	0.711531	0.891696	-0.165377	0.377225	1.01421	0.0203571	0.5791
ILMN_1675398	ALDH1B1	219				0.642285	-0.638714	0.148915	0.667306	-0.58358	0.0265003	0.789352	-0.34126	0.224639	0.686296	-0.543098	0.01623
ILMN_1736539	ALDH1L2	160428	0.828171	-0.272	0.026005	0.828368	-0.271656	0.540291	0.895255	-0.159629	0.5791	0.922301	-0.116691	0.426777	0.857719	-0.221422	0.0960923
ILMN_1793859	ALDH2	217	0.59957	-0.738	1e-06	1.08675	0.120023	0.382733	0.924805	-0.112779	0.195562	0.863817	-0.211202	0.13332	0.735092	-0.444004	0.01623
ILMN_1794825	ALDH3A2	224	0.954621	-0.067	0.765414	0.816108	-0.293168	0.0808556	0.924006	-0.114026	0.267257	0.829465	-0.269747	0.0773886	0.897508	-0.156003	0.355226
ILMN_1728662	ALDH3B1	221	0.860353	-0.217	0.25874	0.830403	-0.268116	0.0808556	0.847791	-0.23822	0.355226	0.740827	-0.432791	0.157704	0.75634	-0.402894	0.0419616
ILMN_1763666	ALDH3B2	222				1.28262	0.359089	0.662521	0.985223	-0.0214785	0.355226	0.841909	-0.248263	0.479929	0.590241	-0.760625	0.195562
ILMN_1696099	ALDH4A1	8659	0.775393	-0.367	0.000986	0.819315	-0.287509	0.19043	0.799807	-0.322276	0.0644577	1.00456	0.00656326	0.250998	0.671429	-0.574694	0.0265003
ILMN_2372398	ALDH5A1	7915				1.06375	0.0891525	1	0.731655	-0.450765	0.01623	0.910824	-0.134755	0.111961	0.625972	-0.67583	0.0265003
ILMN_1785284	ALDH6A1	4329	0.870551	-0.2	0.321663	0.714289	-0.48542	0.0808556	0.633196	-0.659276	0.01623	0.965043	-0.0513348	0.289315	0.787186	-0.345224	0.01623
ILMN_1687508	ALDH7A1	501	0.871154	-0.199	0.216807	0.89812	-0.15502	0.382733	0.826192	-0.275451	0.0960923	0.982985	-0.0247591	0.377225	0.902169	-0.14853	0.0960923
ILMN_2365176	ALDH8A1	64577				0.956606	-0.0640037	0.662521	0.986512	-0.0195912	1	0.807205	-0.308994	0.157704	0.83244	-0.264581	1
ILMN_1761804	ALDH9A1	223	1.03598	0.051	0.745929	1.1529	0.205263	0.662521	1.04516	0.0637291	1	0.923875	-0.114231	0.157704	0.837543	-0.255765	0.0419616
ILMN_1736700	ALDOA	226	1.03311	0.047	0.874998	0.851832	-0.231359	0.0808556	0.743581	-0.427438	0.01623	0.789584	-0.340835	0.0422601	0.797375	-0.32667	0.0419616
ILMN_1747716	ALDOB	229	1.10038	0.138	0.436517							0.960375	-0.0583302	0.816961
ILMN_1755974	ALDOC	230	0.598325	-0.741	1e-05	0.885216	-0.175898	0.662521	0.973453	-0.0388173	0.853307	0.918814	-0.122155	0.658843	1.0104	0.0149257	0.853307
ILMN_1718093	ALG1	56052	1.01537	0.022	0.918033	0.816497	-0.292481	0.382733	0.949612	-0.0745897	0.355226	0.827601	-0.272993	0.0636898	0.962526	-0.0551023	0.355226
ILMN_3243268	ALG10	84920				1.16896	0.225228	0.19043	0.988698	-0.0163978	0.711531	0.944564	-0.0822798	0.961627	0.798904	-0.323905	0.358326
ILMN_1666325	ALG10B	144245	0.918276	-0.123	0.488603	0.921887	-0.117338	1	0.847722	-0.238336	0.267257	0.791891	-0.336627	0.216373	0.728184	-0.457625	0.0419616
ILMN_1660856	ALG11	440138	0.810003	-0.304	0.054164	0.697598	-0.519532	0.382733	0.541132	-0.885946	0.0419616	0.96241	-0.0552771	0.536499	0.746549	-0.421692	0.0644577
ILMN_1743995	ALG12	79087	1.05555	0.078	0.652692	1.04504	0.0635621	1	0.861733	-0.214688	0.267257	0.942279	-0.0857737	0.665006	0.776995	-0.364024	0.184573
ILMN_1761456	ALG13	79868	0.891929	-0.165	0.321482	1.0889	0.122867	0.662521	1.18713	0.24748	0.853307	1.019	0.0271471	0.426777	0.974311	-0.0375461	0.459543
ILMN_1743635	ALG14	199857	0.874179	-0.194	0.158601	0.751038	-0.413042	0.382733	0.727065	-0.459844	0.0644577	0.878376	-0.18709	0.185326	0.850338	-0.233891	0.0960923
ILMN_1782084	ALG1L	200810	1.05336	0.075	0.688752	0.87746	-0.188594	0.382733	0.730004	-0.454024	0.355226	0.74141	-0.431657	0.377225	0.908717	-0.138096	0.711531
ILMN_1722688	ALG2	85365	1.14235	0.192	0.209106	0.736313	-0.44161	0.19043	0.85884	-0.219539	1	1.09944	0.136774	0.750824	1.2824	0.358845	0.361935
ILMN_1711886	ALG3	10195	1.02527	0.036	0.914465	0.893296	-0.16279	0.662521	0.846293	-0.240771	0.0960923	0.94866	-0.0760374	0.289315	0.898744	-0.154019	0.0960923
ILMN_1664449	ALG5	29880	0.895025	-0.16	0.36945	0.946154	-0.0798535	0.382733	0.972923	-0.0396019	0.355226	0.884074	-0.177761	0.185326	0.909087	-0.137509	0.195562
ILMN_1771411	ALG6	29929	0.991717	-0.012	0.950933	1.03918	0.0554516	0.382733	0.643089	-0.636909	0.139087	0.94053	-0.0884547	0.331387	0.582038	-0.780815	0.0644577
ILMN_1685413	ALG8	79053	0.831622	-0.266	0.009992	1.06485	0.0906492	1	0.849936	-0.234574	0.0644577	0.911995	-0.132902	0.426777	0.794333	-0.332184	0.01623
ILMN_1732809	ALG9	79796	0.629815	-0.667	2e-06	0.945174	-0.0813482	0.662521	0.781778	-0.35517	0.0419616	0.97937	-0.0300742	0.859819	0.810062	-0.303896	0.01623
ILMN_1753135	ALK	238	0.997231	-0.004	0.984124	0.863322	-0.212029	0.382733	0.654618	-0.611274	0.459543	0.909083	-0.137516	1	0.689317	-0.536761	0.355226
ILMN_2375973	ALKBH1	8846	1.24315	0.314	0.028049	1.05701	0.0799864	0.0808556	1.21478	0.280693	0.5791	0.805593	-0.311878	0.0340692	0.733012	-0.448091	0.0644577
ILMN_1690252	ALKBH2	121642	1.52732	0.611	0.000137	1.02908	0.041356	1	1.21275	0.278288	0.459543	0.960479	-0.0581742	0.859819	1.13191	0.178758	0.267257
ILMN_2134062	ALKBH3	221120	1.17446	0.232	0.188256	1.06698	0.0935387	0.662521	0.797963	-0.325607	0.0960923	0.880203	-0.184091	0.723932	0.658275	-0.603237	0.0265003
ILMN_1805673	ALKBH4	54784	0.997231	-0.004	0.982632	1.17771	0.23598	0.245278	1.05651	0.0792999	0.723674	1.10883	0.149037	0.665006	0.994716	-0.00764294	0.896125
ILMN_1657283	ALKBH5	54890	1.06585	0.092	0.491589	0.890601	-0.16715	0.662521	0.828004	-0.272291	0.195562	0.892116	-0.164697	0.377225	0.829412	-0.269839	0.195562
ILMN_1808792	ALKBH6	84964	0.888843	-0.17	0.304662	1.04832	0.0680851	1	1.0114	0.0163557	0.5791	0.777957	-0.362238	0.13332	0.750557	-0.413967	0.139087
ILMN_1761764	ALKBH7	84266	1.02243	0.032	0.896299	0.825545	-0.276582	0.382733	0.797981	-0.325574	0.0960923	0.955178	-0.066158	0.216373	0.923286	-0.115151	0.459543
ILMN_1779190	ALKBH8	91801	1.29774	0.376	0.015071							0.772269	-0.372825	0.245278
ILMN_1681046	ALLC	55821	1.04754	0.067	0.715467
ILMN_1709474	ALMS1	7840	1.02172	0.031	0.879494	0.854429	-0.226967	0.371093	0.958143	-0.0616872	1	1.08549	0.118351	0.846451	1.21725	0.283631	0.540291
ILMN_3237132	ALMS1P	NA							0.780731	-0.357103	1	0.99782	-0.00314884	1
ILMN_1713731	ALOX12	239	1.05848	0.082	0.635822
ILMN_1783443	ALOX15	246	0.928517	-0.107	0.490148	1.06098	0.0853912	0.540291	0.931198	-0.10284	0.487453	0.839738	-0.251989	0.245278	0.803395	-0.315819	0.175244
ILMN_2393149	ALOX15B	247	1.07773	0.108	0.51639	0.961835	-0.0561381	1	0.908975	-0.137688	1	0.894892	-0.160214	1	0.845711	-0.241763	1
ILMN_1792150	ALOX5	240	1.08824	0.122	0.488147	0.869481	-0.201773	1	0.80298	-0.316564	0.371093	0.902328	-0.148276	0.662521	0.833315	-0.263066	1
ILMN_1678255	ALOXE3	59344	1.09581	0.132	0.391713	1.01597	0.0228647	1	1.1741	0.231557	0.358326	1.08234	0.114154	0.746886	1.2508	0.322847	0.15558
ILMN_1752669	ALPI	248	0.865737	-0.208	0.195027	0.705137	-0.504025	0.386476	0.7028	-0.508814	0.386476	0.926027	-0.110873	0.897279	0.922958	-0.115663	0.518605
ILMN_2078697	ALPK1	80216				0.877086	-0.18921	0.662521	0.746376	-0.422026	0.267257	0.881221	-0.182425	0.596242	0.749894	-0.415241	0.355226
ILMN_1811238	ALPK2	115701	0.616854	-0.697	1.4e-05
ILMN_1701603	ALPL	249	1.05117	0.072	0.738852
ILMN_1693789	ALPP	250				0.889679	-0.168643	0.662521	0.938572	-0.0914604	0.459543	0.869359	-0.201976	0.791082	0.917135	-0.124794	0.459543
ILMN_1801851	ALPPL2	NA													1.28613	0.363037	1
ILMN_1750256	ALS2	57679	0.988971	-0.016	0.949852	0.954556	-0.0670982	0.382733	0.849304	-0.235647	0.459543	0.907996	-0.139242	0.536499	0.807878	-0.307791	0.459543
ILMN_1700596	ALS2CL	259173	0.927874	-0.108	0.476431	0.943402	-0.0840556	1	1.07931	0.110111	0.288844	0.788473	-0.342866	0.376759	0.902063	-0.148699	1
ILMN_1787314	ALS2CR14	NA				0.964268	-0.0524941	0.382733	0.939382	-0.0902165	1	0.910716	-0.134928	0.13332	0.887212	-0.17265	0.139087
ILMN_1800958	ALS2CR4	NA	0.61005	-0.713	0.001137	1.1543	0.207022	1	1.10484	0.143835	1	0.925205	-0.112155	0.157704	0.885557	-0.175343	0.267257
ILMN_3236443	ALX1	8092	0.993781	-0.009	0.9685	0.771182	-0.374856	1	0.959705	-0.0593372	0.853307	0.851818	-0.231382	0.809894	1.06005	0.0841372	0.474959
ILMN_1729325	ALX3	257	0.958599	-0.061	0.732713
ILMN_1797432	AMAC1	NA	1.1088	0.149	0.292934
ILMN_1715988	AMAC1L2	NA	1.03814	0.054	0.769899	1.06957	0.0970263	0.382733	0.957553	-0.062576	0.853307	0.873137	-0.19572	0.289822	0.781695	-0.355322	0.0682475
ILMN_3246673	AMAC1L3	NA	0.997923	-0.003	0.986628	0.968618	-0.0460001	1	0.808342	-0.306962	0.358326	0.927626	-0.108385	0.636502	0.774133	-0.369346	0.358326
ILMN_1759670	AMACR	23600	1.03526	0.05	0.784422	0.878887	-0.18625	0.386476	0.685542	-0.544684	0.195562	0.816055	-0.293262	0.100412	0.905199	-0.143694	0.139087
ILMN_1794384	AMBN	258	0.904379	-0.145	0.369578
ILMN_1662681	AMBRA1	55626	1.05044	0.071	0.680845	1.02122	0.0302914	0.77283	0.848551	-0.236927	0.662521	1.03218	0.0456954	1	0.85766	-0.221523	0.175244
ILMN_1788462	AMD1	262	1.42701	0.513	0.000199	1.23445	0.303864	0.382733	0.887979	-0.171403	0.139087	0.853915	-0.227836	0.0636898	0.705147	-0.504005	0.0419616
ILMN_1788239	AMDHD1	144193	1.14552	0.196	0.131963							0.793296	-0.334069	0.233038
ILMN_1695759	AMDHD2	51005	0.973329	-0.039	0.895996	0.894453	-0.160922	0.0808556	0.674615	-0.567865	0.0960923	1.07352	0.102345	0.929637	0.809668	-0.304597	0.267257
ILMN_1727258	AMELY	266	1.07252	0.101	0.508496
ILMN_1666258	AMFR	267	1.16554	0.221	0.112739	0.871595	-0.198271	0.0808556	0.767561	-0.381647	0.0419616	0.822698	-0.281564	0.216373	0.688526	-0.538417	0.0265003
ILMN_1660995	AMH	268							0.638071	-0.648211	0.19043	0.824318	-0.278728	0.306685
ILMN_1778723	AMICA1	NA	0.976032	-0.035	0.867681	0.643589	-0.635789	1	0.705924	-0.502414	1	0.913973	-0.129777	0.143672	1.0025	0.00359734	1
ILMN_1765460	AMIGO1	57463	1.00696	0.01	0.95414							0.734745	-0.444684	1	0.784429	-0.350285	1
ILMN_1738233	AMIGO3	386724	0.920188	-0.12	0.44663
ILMN_2394242	AMMECR1	9949	1.07848	0.109	0.403803	0.926904	-0.109509	1	0.798525	-0.324591	0.267257	0.646234	-0.629872	0.0655522	0.764307	-0.387775	0.0419616
ILMN_1727023	AMMECR1L	83607	1.30134	0.38	0.001453	0.895111	-0.159861	0.662521	1.11577	0.15804	0.139087	1.04429	0.0625166	0.723932	1.30172	0.380418	0.0644577
ILMN_1683901	AMN	81693	0.936272	-0.095	0.646397
ILMN_1750880	AMN1	196394	1.00905	0.013	0.961292				0.787302	-0.34501	0.241567	0.84577	-0.241663	0.0736383
ILMN_1792409	AMOT	154796	1.06955	0.097	0.47507	0.359995	-1.47395	1	0.576751	-0.793978	0.241567	0.539608	-0.890016	0.241567	0.864512	-0.210042	1
ILMN_1748141	AMOTL1	154810
ILMN_1778788	AMOTL2	51421	1.01115	0.016	0.946306	0.890169	-0.167849	0.382733	0.937102	-0.0937221	0.355226	0.836793	-0.257058	0.791082	0.880911	-0.182932	1
ILMN_1731223	AMPD3	272	0.973329	-0.039	0.867336				0.981787	-0.0265177	1
ILMN_1685834	AMPH	273	0.946714	-0.079	0.820998
ILMN_1665331	AMT	275	1.0519	0.073	0.659601	0.603784	-0.727896	0.0808556	0.791502	-0.337335	0.609834	0.842589	-0.247098	0.746886	1.10455	0.143462	0.698535
ILMN_2294762	AMY1A	276	0.542615	-0.882	1e-06	0.962163	-0.0556463	0.662521	0.785814	-0.34774	0.195562	1.00437	0.00628461	0.723932	0.820282	-0.285809	0.195562
ILMN_1726327	AMY1B	277	0.621144	-0.687	9e-06	1.02974	0.042281	0.662521	0.821545	-0.283588	0.139087	1.16099	0.215356	0.859819	0.926259	-0.110513	0.0960923
ILMN_1663313	AMY1C	278	0.595428	-0.748	8e-06	0.765666	-0.385213	0.0808556	0.80923	-0.305378	0.0960923	0.854711	-0.226491	0.0933977	0.903342	-0.146655	1
ILMN_1719031	AMY2A	279	0.909408	-0.137	0.395328				0.804615	-0.31363	0.148915
ILMN_1785742	AMZ1	155185				0.698992	-0.516652	0.19043	0.75187	-0.411446	0.0682475	0.809879	-0.304221	0.271589	0.871145	-0.199015	0.474959
ILMN_1801606	AMZ2	51321	1.16151	0.216	0.194115	0.949941	-0.0740902	0.662521	0.841978	-0.248146	0.195562	0.710608	-0.492875	0.216373	0.71477	-0.484449	0.0644577
ILMN_1804812	ANAPC1	64682	1.37745	0.462	0.000342	0.782713	-0.353445	0.19043	1.20559	0.269734	0.195562	0.644963	-0.632712	0.0636898	0.946919	-0.0786874	0.0960923
ILMN_1770378	ANAPC10	10393	1.06955	0.097	0.596096	0.931377	-0.102562	0.382733	0.753925	-0.407508	0.0960923	1.03953	0.0559314	0.791082	0.841471	-0.249014	0.355226
ILMN_1722102	ANAPC11	51529	0.819605	-0.287	0.066837	0.917574	-0.124104	0.662521	0.849847	-0.234725	0.139087	1.04887	0.0688323	0.289315	1.25036	0.322343	0.195562
ILMN_1793894	ANAPC13	25847	0.997923	-0.003	0.987348	1.06096	0.0853698	0.662521	1.14691	0.197749	0.5791	0.937418	-0.0932351	0.929637	1.01336	0.0191441	0.853307
ILMN_1813243	ANAPC2	29882	0.997231	-0.004	0.985359	1.00131	0.00188725	0.77283	1.09897	0.136155	0.254451	0.98721	-0.0185711	0.830324	1.0835	0.115697	0.867632
ILMN_1802973	ANAPC4	29945	0.914465	-0.129	0.427054	1.03288	0.046676	1	0.859207	-0.218922	0.0960923	0.917582	-0.124091	0.0272754	0.763294	-0.38969	0.0265003
ILMN_1723177	ANAPC5	51433	1.03383	0.048	0.832361	0.969103	-0.0452777	0.19043	0.864627	-0.209851	0.0419616	0.986344	-0.0198375	0.426777	0.880008	-0.184411	0.139087
ILMN_2199284	ANAPC7	51434	1.06363	0.089	0.62056	0.915417	-0.127499	0.662521	0.819174	-0.287759	0.139087	0.820593	-0.285261	0.0520588	0.734319	-0.44552	0.0265003
ILMN_1696974	ANG	283	0.957935	-0.062	0.661565	0.771794	-0.373713	0.662521	0.817006	-0.291581	0.711531	0.89672	-0.157271	0.13332	0.949251	-0.0751389	0.5791
ILMN_1665871	ANGEL1	23357	1.03383	0.048	0.849848	0.984141	-0.0230632	0.382733	0.917026	-0.124966	0.0960923	0.911269	-0.13405	0.250998	0.849124	-0.235953	0.0960923
ILMN_1736340	ANGEL2	90806	1.38992	0.475	0.002749	0.785415	-0.348473	0.662521	0.853996	-0.227698	0.355226	0.772103	-0.373136	0.0520588	0.839521	-0.252362	0.195562
ILMN_2086890	ANGPT1	284	0.707597	-0.499	0.001095	0.78537	-0.348555	0.662521	0.699272	-0.516075	0.139087	0.83255	-0.264392	0.271589	0.690965	-0.533316	0.110612
ILMN_1772612	ANGPTL2	23452	0.701736	-0.511	0.025709
ILMN_1695193	ANGPTL3	27329	0.925946	-0.111	0.470734
ILMN_2386444	ANGPTL4	51129	0.795536	-0.33	0.039954	0.78048	-0.357566	0.0808556	0.688087	-0.539337	0.243345	0.965125	-0.0512126	0.378478	0.815414	-0.294395	0.195562
ILMN_1776363	ANK2	287	1.05848	0.082	0.678266
ILMN_2390609	ANK3	288	1.08749	0.121	0.399776	1.06623	0.0925154	1	0.874594	-0.193315	0.5791	0.857756	-0.221361	0.250998	0.703591	-0.507192	0.459543
ILMN_1794470	ANKFY1	51479	0.866337	-0.207	0.334612	0.664921	-0.588744	0.148915	0.677015	-0.562739	0.0960923	0.681036	-0.554197	0.00453064	0.837925	-0.255107	0.267257
ILMN_1765091	ANKHD1	54882	1.38896	0.474	0.000158	0.820951	-0.284631	0.0808556	0.817959	-0.289899	0.267257	0.670501	-0.576689	0.0808556	0.904335	-0.145071	0.5791
ILMN_1766560	ANKHD1-EIF4EBP3	404734	1.16797	0.224	0.056284	0.909631	-0.136647	0.0808556	1.04242	0.0599326	0.853307	0.76624	-0.384132	0.377225	0.878094	-0.187552	1
ILMN_3241218	ANKIB1	54467	1.03814	0.054	0.820902	0.903837	-0.145866	0.382733	0.767416	-0.38192	0.01623	0.860349	-0.217006	0.377225	0.730492	-0.45306	0.0960923
ILMN_3249608	ANKLE2	23141	1.22179	0.289	0.031679	0.966406	-0.0492993	1	0.782532	-0.353778	0.139087	0.903068	-0.147094	0.859819	0.731246	-0.451572	0.0960923
ILMN_1675483	ANKMY1	51281	1.14472	0.195	0.155154	0.786204	-0.347023	0.19043	0.810913	-0.302381	0.0960923	0.945975	-0.0801257	0.658843	0.975705	-0.0354837	0.853307
ILMN_1784292	ANKMY2	57037	0.845572	-0.242	0.108447	1.01618	0.0231525	1	1.01093	0.0156845	1	0.905794	-0.142745	0.289315	0.901118	-0.150213	0.5791
ILMN_1687351	ANKRA2	57763	1.11111	0.152	0.392729	1.33814	0.420225	0.662521	1.28998	0.367351	0.355226	0.93122	-0.102807	0.536499	1.12958	0.175787	0.459543
ILMN_1716264	ANKRD1	27063	0.68302	-0.55	0.060387	0.767445	-0.381864	0.662521	4.18824	2.06634	0.195562	0.892276	-0.164437	0.723932	4.86949	2.28377	0.0960923
ILMN_2115218	ANKRD10	55608	1.86477	0.899	2e-06	0.606402	-0.721653	0.19043	0.647425	-0.627214	0.0960923	0.559311	-0.838277	0.0134187	0.748461	-0.418001	0.5791
ILMN_2108709	ANKRD11	29123	1.24487	0.316	0.009787	0.936811	-0.0941695	0.662521	1.06144	0.0860263	1	0.92541	-0.111835	0.289315	1.04852	0.0683605	0.853307
ILMN_1661833	ANKRD12	23253	1.1065	0.146	0.47455	0.798138	-0.325291	0.19043	0.845283	-0.242493	0.267257	0.927855	-0.10803	0.0933977	0.982663	-0.0252317	0.5791
ILMN_1689908	ANKRD13A	88455	0.672684	-0.572	5.8e-05	1.03102	0.0440693	0.662521	1.20827	0.272947	0.355226	0.912647	-0.131871	0.479929	1.06955	0.0970065	0.459543
ILMN_1794070	ANKRD13B	124930	1.05995	0.084	0.564481	0.609254	-0.714885	0.245278	0.715617	-0.48274	0.133614	0.821952	-0.282873	0.378478	0.965449	-0.0507286	0.867632
ILMN_2148507	ANKRD13C	81573	1.20748	0.272	0.04171	1.16336	0.218292	1	1.12739	0.172984	1	0.887189	-0.172687	0.426777	0.859759	-0.217996	0.459543
ILMN_1672356	ANKRD13D	338692	1.10803	0.148	0.375898	0.756189	-0.403181	0.19043	0.891426	-0.165813	0.355226	0.694969	-0.524979	0.0636898	0.819257	-0.287611	0.267257
ILMN_2353431	ANKRD16	54522	1.11884	0.162	0.354533	0.83465	-0.260756	0.0808556	0.815801	-0.29371	0.0419616	0.963037	-0.0543368	0.377225	1.3847	0.469568	0.082731
ILMN_1787064	ANKRD17	26057	1.33886	0.421	0.000433	1.10117	0.139032	0.662521	0.802815	-0.316861	0.355226	0.9111	-0.134318	0.185326	0.843053	-0.246304	0.0644577
ILMN_3255211	ANKRD18A	253650	0.978063	-0.032	0.89658
ILMN_3233098	ANKRD18B	441459										0.823468	-0.280215	0.698535
ILMN_2215824	ANKRD20A1	84210	0.934975	-0.097	0.564266	0.668545	-0.580903	0.19043	0.700865	-0.512792	0.195562	0.71117	-0.491735	0.13332	0.74555	-0.423624	0.459543
ILMN_2398211	ANKRD20A3	441425	0.982821	-0.025	0.880343
ILMN_2181867	ANKRD20B	NA				0.631568	-0.662991	0.386476	0.608832	-0.715885	0.066753	0.972171	-0.040718	0.927264	0.937173	-0.0936122	0.233038
ILMN_2132599	ANKRD22	118932	1.13761	0.186	0.117018	0.990643	-0.0135625	0.382733	0.813439	-0.297893	0.195562	0.942097	-0.0860522	0.185326	0.990715	-0.0134588	0.711531
ILMN_1747151	ANKRD23	200539	0.898132	-0.155	0.217396	1.0962	0.13251	1	1.27089	0.345845	0.518605	0.774585	-0.368504	0.245278	0.898027	-0.15517	1
ILMN_1768202	ANKRD24	170961	0.983502	-0.024	0.901238	0.558791	-0.83962	1	0.491289	-1.02536	0.288844	1.12425	0.168966	0.470486	0.988443	-0.01677	0.723674
ILMN_1740161	ANKRD26	22852	1.01185	0.017	0.941785	0.901103	-0.150236	1	0.995684	-0.00623946	1	0.89522	-0.159685	0.426777	0.989185	-0.0156882	0.853307
ILMN_1794063	ANKRD27	84079	1.089	0.123	0.470278	0.839674	-0.252099	0.662521	0.801307	-0.319572	0.355226	0.862236	-0.213845	0.791082	0.822839	-0.281318	0.195562
ILMN_2232520	ANKRD28	23243	1.14235	0.192	0.318693	1.39053	0.475637	0.371093	0.932758	-0.100425	0.267257	0.876538	-0.190112	0.215925	0.802261	-0.317856	0.195562
ILMN_2075643	ANKRD29	147463
ILMN_1730678	ANKRD30B	374860				0.85577	-0.224705	0.0808556	0.898296	-0.154737	0.459543	0.921318	-0.118229	0.13332	0.967101	-0.0482613	0.355226
ILMN_1708056	ANKRD31	256006	0.944747	-0.082	0.692236
ILMN_2214278	ANKRD32	NA	1.07252	0.101	0.458939	0.860038	-0.217528	0.382733	0.701311	-0.511874	0.139087	0.995108	-0.00707436	0.859819	0.811453	-0.301421	0.267257
ILMN_1667748	ANKRD33	341405	0.645729	-0.631	0.000136	0.958548	-0.0610775	0.662521	0.834876	-0.260367	0.0960923	0.980317	-0.0286802	0.536499	0.853836	-0.227969	0.0419616
ILMN_2119793	ANKRD34A	284615	0.965267	-0.051	0.758119	0.835047	-0.260072	0.0808556	0.624421	-0.679409	0.01623	0.92905	-0.106172	0.859819	0.694714	-0.525509	0.0419616
ILMN_1655766	ANKRD34B	340120				0.709675	-0.494771	1	0.670529	-0.576629	0.540291	0.88095	-0.182867	0.77283	0.832357	-0.264726	1
ILMN_1758215	ANKRD34C	390616	0.905007	-0.144	0.293409				1.11547	0.15765	0.698535	0.709458	-0.495211	0.133614
ILMN_1798006	ANKRD35	148741	0.892547	-0.164	0.439492	0.755406	-0.404675	0.245278	0.675558	-0.565849	0.464214	1.0557	0.0781949	0.672	0.944106	-0.0829794	0.723674
ILMN_2280568	ANKRD36	375248							1.03672	0.0520215	0.698535
ILMN_1780806	ANKRD36B	57730	1.02101	0.03	0.902358	0.696794	-0.521196	0.19043	0.77657	-0.364812	0.366157	0.812196	-0.300101	0.0926958	0.905184	-0.143717	0.09329
ILMN_1756417	ANKRD37	353322	1.0203	0.029	0.886085	1.15153	0.20355	0.662521	0.932209	-0.101274	0.5791	1.12039	0.164002	0.596242	0.907002	-0.140822	1
ILMN_1776936	ANKRD38	NA	1.12662	0.172	0.243231							0.827165	-0.273753	0.540291	0.857049	-0.22255	1
ILMN_1710979	ANKRD39	51239	0.885768	-0.175	0.230499	0.770183	-0.376727	0.19043	0.743246	-0.428089	0.0419616	0.972495	-0.0402371	0.791082	0.938482	-0.0915986	0.355226
ILMN_1758846	ANKRD40	91369	1.02243	0.032	0.866142	0.978593	-0.0312194	1	1.24742	0.318951	0.459543	0.964738	-0.051791	0.596242	1.22976	0.298379	0.5791
ILMN_1751744	ANKRD41	NA	1.17365	0.231	0.059891
ILMN_1779882	ANKRD43	NA				1.02769	0.0394087	0.662521	0.835628	-0.259068	0.195562	1.06226	0.0871313	0.859819	0.863732	-0.211345	0.0265003
ILMN_2059844	ANKRD44	91526				0.859619	-0.21823	0.662521	0.974984	-0.0365503	1	0.851681	-0.231615	0.244277	0.96598	-0.0499349	1
ILMN_1712298	ANKRD46	157567	1.29954	0.378	0.012623	1.1586	0.212385	0.662521	0.952877	-0.0696376	0.5791	0.966364	-0.0493606	0.216373	0.794774	-0.331383	0.0419616
ILMN_1755588	ANKRD47	NA	1.00765	0.011	0.959077	0.661759	-0.595622	0.540291	0.848007	-0.237852	0.695299	0.96542	-0.050771	0.531667	1.23713	0.306999	0.486234
ILMN_1669259	ANKRD49	54851	1.15669	0.21	0.184492	1.27248	0.347645	0.19043	1.20691	0.271322	0.267257	0.829952	-0.268901	0.596242	0.787186	-0.345224	0.459543
ILMN_1793466	ANKRD5	NA										0.948179	-0.076768	0.540291
ILMN_2226304	ANKRD50	57182	0.835667	-0.259	0.089729	0.935828	-0.095684	0.662521	0.776424	-0.365084	0.195562	0.929969	-0.104745	0.185326	0.771563	-0.374145	0.139087
ILMN_3244029	ANKRD52	283373	1.09126	0.126	0.426613	0.598703	-0.740088	0.19043	0.706864	-0.500495	0.0644577	0.673501	-0.570248	0.289315	0.795176	-0.330654	0.459543
ILMN_1772660	ANKRD53	79998	0.959929	-0.059	0.734237	0.779965	-0.358518	0.540291	0.684759	-0.546333	0.371093	0.808446	-0.306776	0.662521	0.709763	-0.494591	0.77283
ILMN_1766309	ANKRD54	129138				0.98352	-0.0239734	0.662521	0.851066	-0.232656	0.195562	0.96969	-0.0444047	0.791082	0.839099	-0.253088	0.267257
ILMN_2072045	ANKRD56	NA				0.649562	-0.622462	0.540291	0.888915	-0.169882	1	0.575005	-0.798355	0.288844	0.786885	-0.345775	0.105193
ILMN_1724040	ANKRD57	NA	1.69584	0.762	0	1.13075	0.177284	0.662521	0.931763	-0.101965	0.355226	0.980872	-0.0278629	0.250998	0.808258	-0.307111	0.0265003
ILMN_1692849	ANKRD58	NA	1.05044	0.071	0.758754
ILMN_2178587	ANKRD6	22881	0.872968	-0.196	0.258354	0.866187	-0.20725	0.662521	0.937262	-0.0934753	0.459543	0.748148	-0.418605	0.0933977	0.809537	-0.304831	0.139087
ILMN_2354930	ANKRD7	56311	1.09354	0.129	0.410495
ILMN_2048607	ANKRD9	122416	0.620284	-0.689	0	0.842196	-0.247772	0.0808556	0.748132	-0.418635	0.0644577	1.01417	0.0203052	0.596242	0.900902	-0.150558	0.195562
ILMN_1813669	ANKS1A	23294	1.17772	0.236	0.053461	0.819007	-0.288052	0.19043	0.852407	-0.230386	0.267257	0.770643	-0.375866	0.185326	0.80207	-0.318199	0.139087
ILMN_2340974	ANKS1B	56899	0.972655	-0.04	0.843083
ILMN_1751636	ANKS3	124401	0.997923	-0.003	0.988843	1.0878	0.121407	0.662521	1.05512	0.0774048	0.355226	0.852756	-0.229795	0.859819	0.82714	-0.273796	0.711531
ILMN_2370692	ANKZF1	55139	0.904379	-0.145	0.404937	0.85536	-0.225397	0.0808556	1.12277	0.167058	0.195562	0.903497	-0.146408	0.216373	1.40275	0.488256	0.107347
ILMN_1739645	ANLN	54443	1.0403	0.057	0.879232	1.07103	0.0989986	0.662521	0.74347	-0.427654	0.267257	1.0745	0.103664	0.723932	0.745878	-0.422988	0.195562
ILMN_3237961	ANO1	55107	0.958599	-0.061	0.748761	0.809821	-0.304325	0.19043	0.762543	-0.391109	0.0644577	0.792423	-0.335657	0.216373	0.746161	-0.422441	0.0960923
ILMN_1767111	ANO10	55129	0.774319	-0.369	0.027157	0.711728	-0.490602	0.0808556	0.678627	-0.559308	0.01623	0.883431	-0.178811	0.479929	0.842345	-0.247517	0.0644577
ILMN_3248094	ANO2	57101	1.00486	0.007	0.972976	1.03978	0.0562771	1	1.13357	0.180871	1
ILMN_2228215	ANO4	121601	0.554016	-0.852	0
ILMN_1674941	ANO6	196527	0.864537	-0.21	0.183393	0.806983	-0.30939	0.19043	0.649081	-0.62353	0.195562	0.96527	-0.0509963	0.426777	0.776396	-0.365136	0.0960923
ILMN_1683824	ANO7	50636	1.03958	0.056	0.772294
ILMN_1709124	ANO8	57719	0.942131	-0.086	0.663021	0.914449	-0.129026	0.0808556	0.851775	-0.231456	0.494125	0.904324	-0.145089	0.626117	0.842344	-0.247519	0.233038
ILMN_1762629	ANO9	338440	1.10267	0.141	0.388624	1.1344	0.181935	0.382733	1.12505	0.169992	0.358326	0.884758	-0.176645	0.268472	0.838504	-0.254109	0.5791
ILMN_1807945	ANP32A	8125	1.04972	0.07	0.695248	1.01831	0.0261823	1	0.899417	-0.152938	0.195562	1.09132	0.12608	0.426777	0.963903	-0.0530401	0.853307
ILMN_1684293	ANP32B	10541	1.20748	0.272	0.036172	0.891335	-0.165961	0.662521	0.75117	-0.412788	0.0644577	1.05375	0.0755309	0.723932	0.888044	-0.171297	0.355226
ILMN_1655868	ANP32C	23520	1.21841	0.285	0.063679	0.903467	-0.146456	0.662521	0.796715	-0.327865	0.195562	1.05053	0.071111	0.929637	0.926396	-0.110298	0.459543
ILMN_1684923	ANP32E	81611	0.96393	-0.053	0.781649							0.843545	-0.245464	0.77283	0.899414	-0.152943	0.371093
ILMN_1763837	ANPEP	290	0.797192	-0.327	0.04499
ILMN_1887731	ANRIL	NA
ILMN_2387995	ANTXR1	84168	0.764718	-0.387	0.03366	0.807856	-0.30783	0.245278	0.775619	-0.36658	0.01623	0.708425	-0.497312	0.0728489	0.657136	-0.605737	0.17146
ILMN_1812926	ANTXR2	118429	0.883315	-0.179	0.131963				0.850509	-0.233602	0.540291	0.9779	-0.0322411	0.698535
ILMN_2184184	ANXA1	301	0.682074	-0.552	6.4e-05	0.690613	-0.534051	0.662521	2.21791	1.1492	0.459543	0.721188	-0.471553	0.157704	2.3161	1.2117	0.01623
ILMN_1699421	ANXA10	11199	0.985549	-0.021	0.933326
ILMN_2380494	ANXA11	311	0.802181	-0.318	0.006592	0.836424	-0.257694	0.662521	0.82167	-0.28337	0.195562	0.892162	-0.164622	0.331387	0.694443	-0.526072	0.195562
ILMN_2412490	ANXA13	312	0.944092	-0.083	0.686671
ILMN_2409167	ANXA2	302	0.825878	-0.276	0.037122	0.890146	-0.167887	0.0808556	0.854518	-0.226817	0.0644577	0.829591	-0.269528	0.479929	0.837303	-0.256178	0.459543
ILMN_1698100	ANXA2P1	303	0.7285	-0.457	0.007988	0.897223	-0.156461	0.0808556	0.837114	-0.256504	0.0960923	0.943555	-0.083821	0.596242	0.70202	-0.510417	0.0644577
ILMN_3235632	ANXA2P2	304				1.05955	0.0834569	1	0.92776	-0.108176	0.0960923	1.00368	0.00530181	0.426777	0.878838	-0.186331	0.139087
ILMN_1798372	ANXA2P3	305	0.827023	-0.274	0.094128	0.889985	-0.168147	0.382733	0.797117	-0.327137	0.139087	1.08181	0.113442	0.791082	0.968921	-0.0455487	0.5791
ILMN_1694548	ANXA3	306	0.951318	-0.072	0.752841	1.09425	0.129943	0.662521	1.1126	0.153929	1	0.992708	-0.0105579	0.723932	1.00935	0.0134284	1
ILMN_1711408	ANXA4	307	0.871154	-0.199	0.253698	1.15404	0.206697	1	0.803757	-0.315169	0.139087	0.955976	-0.0649535	0.658843	0.66581	-0.586819	0.459543
ILMN_1741003	ANXA5	308	0.713013	-0.488	0.003453	1.11604	0.158391	0.662521	0.85863	-0.219891	0.459543	1.00018	0.000264096	0.536499	0.769494	-0.378018	0.0419616
ILMN_1678612	ANXA6	309				0.853892	-0.227874	0.382733	0.804868	-0.313176	0.0265003	0.803816	-0.315063	0.13332	0.749902	-0.415226	0.01623
ILMN_1703791	ANXA7	310	0.836246	-0.258	0.033244	1.14026	0.189357	0.662521	0.953286	-0.0690192	0.459543	1.01116	0.0160056	0.723932	0.845355	-0.242371	0.01623
ILMN_2186983	ANXA8L2	NA	1.01537	0.022	0.9223
ILMN_2217601	ANXA9	8416				0.969633	-0.0444899	0.662521	0.81588	-0.293571	0.0419616	0.921917	-0.117291	0.331387	0.775731	-0.366372	0.0419616
ILMN_1709820	AOAH	313										0.674434	-0.56825	1
ILMN_1799863	AOC2	314	0.97942	-0.03	0.880343				0.994714	-0.00764587	0.540291	0.893962	-0.161714	0.540291
ILMN_1782086	AOC3	8639				1.03938	0.055719	0.540291	1.16092	0.215264	0.723674	0.677433	-0.56185	0.0472209	0.756648	-0.402305	0.305507
ILMN_1813840	AOF2	NA	1.1321	0.179	0.146977	1.03589	0.0508696	1	0.880735	-0.18322	0.267257	0.968037	-0.0468651	0.377225	0.823046	-0.280954	0.195562
ILMN_1767113	AOX1	316	1.06881	0.096	0.774512
ILMN_1789676	AOX2P	344454	0.918913	-0.122	0.437639	0.674772	-0.567528	1	0.829858	-0.269064	0.241567
ILMN_1781983	AP1B1	162	0.682547	-0.551	0.00021	1.42579	0.51176	0.540291	0.732783	-0.448542	0.139087	1.18292	0.242348	0.698535	0.937902	-0.0924908	0.139087
ILMN_2399627	AP1G1	164	1.14711	0.198	0.173678	0.81323	-0.298265	0.662521	0.875427	-0.191941	0.267257	0.817508	-0.290694	0.0340692	0.831265	-0.266619	0.267257
ILMN_1754179	AP1G2	8906	0.97942	-0.03	0.876765	0.757004	-0.401626	0.0808556	0.84188	-0.248313	0.355226	0.884215	-0.177531	0.13332	0.983354	-0.0242177	0.853307
ILMN_2415467	AP1GBP1	NA	1.15189	0.204	0.270053	0.787567	-0.344525	0.77283	0.811563	-0.301225	0.55569	0.938078	-0.0922198	0.596242	0.96666	-0.0489198	0.459543
ILMN_1754738	AP1M1	8907	0.686818	-0.542	1e-05	0.839359	-0.25264	0.19043	0.664416	-0.589843	0.01623	0.975772	-0.0353837	0.658843	0.772397	-0.372586	0.01623
ILMN_1705861	AP1M2	10053	1.04681	0.066	0.689364	0.83966	-0.252124	0.662521	0.660024	-0.599409	0.0644577	0.963601	-0.0534925	0.13332	0.75745	-0.400778	0.0265003
ILMN_1751345	AP1S1	1174	1.12117	0.165	0.437622	0.830451	-0.268033	0.382733	0.92684	-0.109608	0.0960923	0.82892	-0.270696	0.00267971	0.893432	-0.162571	0.0419616
ILMN_2120273	AP1S2	8905	0.811127	-0.302	0.053231	0.98789	-0.017578	0.662521	0.778342	-0.361525	0.139087	0.81758	-0.290568	0.426777	0.701531	-0.511422	0.139087
ILMN_1768610	AP1S3	130340	0.948027	-0.077	0.694858
ILMN_1673108	AP2A1	160	0.98214	-0.026	0.905709	0.793117	-0.334394	0.0808556	0.707617	-0.49896	0.0265003	0.806264	-0.310676	0.0340692	0.719346	-0.475242	0.0644577
ILMN_1803779	AP2A2	161	0.990343	-0.014	0.950933	0.761469	-0.393143	0.0808556	0.744657	-0.425353	0.358326	1.07563	0.105181	0.953857	1.05188	0.0729721	0.648503
ILMN_1681998	AP2B1	163	1.04464	0.063	0.78755	0.820708	-0.285059	0.0808556	0.804533	-0.313777	0.0419616	0.850821	-0.233073	0.331387	0.779728	-0.358957	0.139087
ILMN_1699598	AP2M1	1173	0.941478	-0.087	0.700222	0.865291	-0.208743	0.19043	0.789235	-0.341473	0.01623	0.956034	-0.0648656	0.157704	0.872003	-0.197596	0.0960923
ILMN_1809957	AP2S1	1175	0.834509	-0.261	0.021089	0.867752	-0.204646	0.0808556	0.771452	-0.374352	0.01623	0.948273	-0.0766258	0.426777	0.848582	-0.236874	0.0960923
ILMN_1768867	AP3B1	8546	0.808321	-0.307	0.004958	0.819586	-0.287033	0.382733	0.78909	-0.341738	0.0644577	0.873286	-0.195473	0.13332	0.840793	-0.250177	0.0265003
ILMN_2390114	AP3D1	8943	1.1088	0.149	0.442747	0.920477	-0.119547	0.382733	0.907712	-0.139693	0.0644577	1.03755	0.0531794	0.723932	0.950371	-0.073438	0.459543
ILMN_2362122	AP3M1	26985	1.11961	0.163	0.341296	0.885757	-0.175017	0.382733	0.703696	-0.506976	0.139087	0.845658	-0.241853	0.331387	0.791914	-0.336584	0.139087
ILMN_1676946	AP3M2	10947	0.94737	-0.078	0.59407	1.04776	0.0673023	1	1.06559	0.0916512	1	0.879396	-0.185416	0.250998	0.894364	-0.161067	0.5791
ILMN_2311761	AP3S1	1176	1.19997	0.263	0.14296	1.01164	0.0166966	1	0.940923	-0.0878516	0.267257	0.813163	-0.298384	0.13332	0.75632	-0.402932	0.0644577
ILMN_1731596	AP3S2	10239	0.940174	-0.089	0.674825	0.990277	-0.0140956	0.662521	0.827835	-0.272584	0.355226	1.01804	0.0257884	0.479929	0.851041	-0.2327	0.355226
ILMN_1669377	AP4B1	10717	0.988286	-0.017	0.924344	0.92447	-0.113302	1	1.00433	0.00623609	0.711531	0.912528	-0.132059	0.596242	0.991359	-0.0125211	0.853307
ILMN_1754531	AP4E1	23431	0.973329	-0.039	0.847544	1.02393	0.0341217	1	0.86118	-0.215613	0.0960923	0.946773	-0.078909	0.596242	0.796285	-0.328644	0.139087
ILMN_1779512	AP4M1	9179	1.01115	0.016	0.948883				0.965348	-0.0508792	1	0.821099	-0.284372	0.0368884
ILMN_1760466	AP4S1	11154	0.955283	-0.066	0.718987
ILMN_1659463	APAF1	317	0.75419	-0.407	0.032451	0.880557	-0.183512	0.382733	0.972081	-0.0408513	0.0808556	0.773982	-0.369628	0.157704	0.865923	-0.207689	0.853307
ILMN_1723626	APBA2	321	0.876606	-0.19	0.190533
ILMN_2270491	APBA2BP	NA	0.876606	-0.19	0.139685	0.934341	-0.0979788	0.382733	0.675519	-0.565932	0.0644577	0.984218	-0.0229505	0.859819	0.71158	-0.490903	0.0265003
ILMN_1686610	APBA3	9546	0.882703	-0.18	0.199842	0.856115	-0.224123	0.0808556	0.92069	-0.119213	0.0960923	0.937929	-0.0924488	0.289315	1.00867	0.0124614	1
ILMN_1769918	APBB1	322	1.07103	0.099	0.613671
ILMN_1801710	APBB1IP	54518	1.10343	0.142	0.550864	1.04397	0.062086	0.662521	0.834638	-0.260777	0.609834	0.913955	-0.129805	0.156254	0.73069	-0.452668	0.0524795
ILMN_1716790	APBB2	323				0.453448	-1.14099	0.540291	0.514295	-0.959333	0.558185	0.789452	-0.341076	0.159864	0.775629	-0.366561	0.110612
ILMN_2320513	APBB3	10307	0.871758	-0.198	0.211046	0.832213	-0.264975	0.0808556	0.922086	-0.117026	0.355226	0.759393	-0.397081	0.0773886	0.801814	-0.31866	0.459543
ILMN_1662668	APC	324	1.05848	0.082	0.658628
ILMN_1659950	APC2	10297	0.983502	-0.024	0.917433
ILMN_1656951	APCDD1	147495	0.885154	-0.176	0.398798
ILMN_1689431	APCDD1L	164284	0.708088	-0.498	0.115919
ILMN_1708833	APCS	325	1.07699	0.107	0.476431
ILMN_1740052	APEG1	NA	0.878431	-0.187	0.163071							1.4152	0.501011	1
ILMN_1718023	APEH	327	0.90689	-0.141	0.306346	0.877426	-0.18865	0.0808556	0.762879	-0.390474	0.01623	1.05545	0.0778544	0.859819	0.917659	-0.123969	0.139087
ILMN_1661886	APEX1	328	1.12818	0.174	0.216247	0.880969	-0.182837	0.382733	0.848009	-0.237848	0.459543	0.90908	-0.137521	0.479929	1.00914	0.0131264	0.853307
ILMN_1652505	APEX2	27301	1.13603	0.184	0.221992	0.86166	-0.21481	0.0808556	0.929278	-0.105818	0.459543	0.935869	-0.0956211	0.216373	1.00931	0.0133709	1
ILMN_2398388	APH1A	51107	0.880259	-0.184	0.334977	0.816725	-0.292078	0.19043	0.722718	-0.468495	0.0419616	0.953474	-0.0687345	0.185326	0.932475	-0.100863	0.0960923
ILMN_1767816	APH1B	83464	0.720964	-0.472	0.000771	0.944543	-0.0823113	1	0.852232	-0.230682	0.355226	0.98262	-0.0252939	0.859819	0.886588	-0.173664	0.0644577
ILMN_1815051	API5	8539	1.37364	0.458	0.000255	0.871328	-0.198713	1	0.841684	-0.248649	0.5791	0.939481	-0.0900633	0.216373	0.90752	-0.139999	0.355226
ILMN_1793598	APIP	51074	1.12584	0.171	0.373956	1.0998	0.137243	0.662521	0.895689	-0.15893	0.139087	0.920872	-0.118928	0.216373	0.804725	-0.313432	0.01623
ILMN_1793360	APITD1	NA	1.25788	0.331	0.011896	0.961224	-0.0570553	0.662521	0.809216	-0.305403	0.267257	0.848546	-0.236935	0.377225	0.714357	-0.485283	0.0265003
ILMN_3243695	APLF	200558				0.529543	-0.917179	0.371093	0.611226	-0.710222	0.558185	1.36255	0.446313	0.170904	1.57273	0.65327	0.09329
ILMN_1689353	APLN	8862	1.08523	0.118	0.441567
ILMN_1763834	APLP1	333	0.860949	-0.216	0.175957	0.928396	-0.107188	0.382733	0.712349	-0.489343	0.0265003	1.01211	0.017373	0.52445	0.722162	-0.469607	0.110612
ILMN_1710482	APLP2	334	0.667574	-0.583	3.7e-05	0.809014	-0.305763	0.19043	0.782999	-0.352917	0.01623	0.745305	-0.424097	0.13332	0.784442	-0.350262	0.0419616
ILMN_1796737	APM-1	NA	0.945402	-0.081	0.704129	1.08856	0.122415	1	0.583883	-0.776249	1
ILMN_1729533	APOA1BP	NA	1.12117	0.165	0.387398	0.868248	-0.20382	0.382733	0.712235	-0.489575	0.0265003	1.01025	0.0147162	0.791082	0.828723	-0.271039	0.0960923
ILMN_1754055	APOA5	116519				0.902234	-0.148427	0.698535	0.994523	-0.00792293	0.698535	0.698996	-0.516644	0.698535	0.770496	-0.376141	0.698535
ILMN_1664024	APOB	338	1.08222	0.114	0.407607
ILMN_1697925	APOB48R	NA										1.36972	0.45388	0.245278
ILMN_1813881	APOBEC1	339	0.966606	-0.049	0.765414
ILMN_2219466	APOBEC3B	9582	1.10191	0.14	0.686464	0.982202	-0.0259078	0.662521	1.00027	0.000391593	0.711531	0.884833	-0.176523	0.157704	0.901111	-0.150223	0.853307
ILMN_1675684	APOBEC3C	27350	0.891311	-0.166	0.271906							0.68413	-0.547658	1
ILMN_2296950	APOBEC3F	200316	0.70907	-0.496	0.01198	0.897052	-0.156737	0.19043	0.80117	-0.319819	0.355226	0.976863	-0.0337712	0.479929	0.884349	-0.177312	0.267257
ILMN_1802106	APOBEC3G	60489	0.941478	-0.087	0.854289	0.571666	-0.806755	1	0.67788	-0.560899	0.453255	1.12985	0.176134	0.366157	1.33977	0.42199	0.371093
ILMN_1789007	APOC1	341	1.02385	0.034	0.874998	0.957082	-0.063285	0.698535	1.39071	0.475824	0.0451269	0.949681	-0.0744846	0.377225	1.37996	0.464624	0.194851
ILMN_1802923	APOC2	344	1.01677	0.024	0.893707
ILMN_1780170	APOD	347				0.836837	-0.256981	0.19043	0.886559	-0.173712	0.0960923	0.9215	-0.117944	0.377225	0.976252	-0.0346742	0.459543
ILMN_1740938	APOE	348	0.710054	-0.494	0.288454	0.840055	-0.251445	0.382733	0.91861	-0.122475	0.355226	0.881094	-0.182632	0.791082	0.963488	-0.0536619	1
ILMN_1809311	APOF	319							1.18687	0.247162	0.386476	0.907486	-0.140053	0.595883
ILMN_2248822	APOL2	23780	1.01677	0.024	0.905405	0.894561	-0.160749	0.382733	2.66164	1.41231	0.288844	0.720079	-0.473772	0.665006	1.1126	0.153933	0.361935
ILMN_2369144	APOL3	80833	0.983502	-0.024	0.908587	0.974267	-0.0376114	0.698535	2.85609	1.51404	0.24716	0.763335	-0.389613	0.17791	2.23774	1.16204	0.332922
ILMN_1779070	APOL4	80832	0.954621	-0.067	0.715467
ILMN_1731941	APOM	55937	1.07923	0.11	0.498622	0.944661	-0.0821316	1	0.872046	-0.197523	0.139087	0.946773	-0.0789096	1	0.873996	-0.194301	0.195562
ILMN_1721623	APOO	79135				0.878724	-0.186518	0.19043	0.749078	-0.416812	0.0419616	0.877305	-0.18885	0.13332	0.747868	-0.419144	0.01623
ILMN_1777483	APOOL	139322	1.01819	0.026	0.903432	1.03403	0.048281	0.662521	0.846941	-0.239667	0.5791	1.07103	0.0990013	0.658843	0.877246	-0.188947	0.0419616
ILMN_2404065	APP	351	0.677832	-0.561	0.003863	0.725432	-0.463089	0.19043	0.76799	-0.38084	0.0419616	0.844097	-0.244519	0.377225	0.681488	-0.55324	0.0960923
ILMN_1694875	APPBP2	10513	1.01537	0.022	0.904582	0.962966	-0.0544435	0.77283	0.914641	-0.128722	0.17146	0.940073	-0.0891548	0.536499	0.794295	-0.332253	0.195562
ILMN_1763730	APPL1	26060	1.09809	0.135	0.329964	0.836478	-0.2576	0.0808556	0.839807	-0.25187	0.0419616	0.86113	-0.215697	0.929637	0.864557	-0.209968	0.5791
ILMN_1765076	APPL2	55198	0.771105	-0.375	0.01746	0.96662	-0.0489785	0.662521	0.719924	-0.474083	0.853307	1.06531	0.0912799	0.723932	0.79343	-0.333824	0.459543
ILMN_1726410	APRT	353	1.23285	0.302	0.040994	0.839928	-0.251662	0.0808556	0.692757	-0.529578	0.01623	0.922433	-0.116484	0.426777	0.829956	-0.268894	0.0960923
ILMN_2317348	APTX	54840	1.16231	0.217	0.187215	0.91441	-0.129087	0.0808556	0.762908	-0.390419	0.01623	1.01617	0.0231423	0.791082	0.815361	-0.29449	0.01623
ILMN_1681103	AQP1	358	1.07103	0.099	0.547886							0.612218	-0.707883	0.245278
ILMN_1762606	AQP11	282679	0.916369	-0.126	0.510633	1.12215	0.166261	1	0.790721	-0.33876	0.355226	0.950361	-0.0734518	0.13332	0.669672	-0.578473	0.01623
ILMN_3246595	AQP12B	653437	0.998615	-0.002	0.994661	0.916755	-0.125393	0.662521	0.948942	-0.0756084	0.853307	1.04098	0.0579415	0.377225	1.07753	0.107726	0.853307
ILMN_1651574	AQP3	360	1.0203	0.029	0.887388
ILMN_1666519	AQP6	363	0.937571	-0.093	0.682318
ILMN_3245829	AQP7P1	375719													0.885749	-0.175029	1
ILMN_3251648	AQP7P2	389756	1.16312	0.218	0.251456	0.860613	-0.216564	0.540291	0.808408	-0.306844	0.371093	0.967046	-0.048343	1	0.908386	-0.138623	0.540291
ILMN_2177460	AQR	9716	1.07923	0.11	0.451781	0.790986	-0.338276	0.0808556	0.900758	-0.150789	0.267257	0.908205	-0.138909	0.162936	1.11705	0.159694	0.609834
ILMN_1767351	AR	367	1.08673	0.12	0.479393	0.898517	-0.154383	0.19043	0.794312	-0.332222	0.0960923	0.716225	-0.481515	0.377225	0.633162	-0.659354	0.355226
ILMN_1658883	ARAF	369	1.00347	0.005	0.981632	0.804935	-0.313056	0.382733	0.816323	-0.292787	0.267257	0.948071	-0.0769336	0.377225	0.961484	-0.0566648	0.195562
ILMN_3269719	ARAP1	116985	0.957935	-0.062	0.701346	0.828599	-0.271254	0.0808556	0.628749	-0.669444	0.0419616	1.07948	0.110335	0.791082	0.819119	-0.287855	0.5791
ILMN_3244434	ARAP2	116984	1.09051	0.125	0.472199	0.806577	-0.310116	0.662521	0.761783	-0.392549	0.0960923	0.813204	-0.298311	0.229049	0.768041	-0.380744	0.184573
ILMN_1812618	ARAP3	64411	0.940826	-0.088	0.675273	0.892418	-0.164209	0.148915	1.51032	0.59485	0.55569	0.852403	-0.230392	0.426777	1.4426	0.528667	0.459543
ILMN_1711120	ARC	23237										1.0135	0.0193509	0.77283
ILMN_1699703	ARCN1	372	1.05775	0.081	0.652692	0.972923	-0.0396024	0.19043	0.929669	-0.105211	0.0644577	0.903161	-0.146944	0.157704	0.863009	-0.212553	0.139087
ILMN_1721977	ARD1A	NA	1.08523	0.118	0.550798	1.02157	0.0307876	1	0.767513	-0.381738	0.0644577	0.998665	-0.00192678	1	0.750304	-0.414452	0.01623
ILMN_1802203	ARF1	375	1.17691	0.235	0.090212	0.835626	-0.25907	0.0808556	0.818131	-0.289597	0.0265003	0.942611	-0.0852652	0.185326	0.6615	-0.596186	0.0265003
ILMN_1682938	ARF3	377	0.951318	-0.072	0.786812	0.803196	-0.316176	1	0.759871	-0.396175	0.267257	0.869356	-0.20198	0.426777	0.822462	-0.281979	0.139087
ILMN_1723884	ARF4	378	0.678773	-0.559	0.000283	0.890827	-0.166783	0.0808556	0.853402	-0.228703	0.0644577	0.868147	-0.203989	0.250998	0.891954	-0.164959	0.355226
ILMN_1752340	ARF5	381	0.868742	-0.203	0.13851	0.865414	-0.208537	0.0808556	0.913314	-0.130818	0.0960923	0.862065	-0.214131	0.289315	0.909779	-0.136412	0.711531
ILMN_1764297	ARF6	382				0.943855	-0.0833623	1	0.805798	-0.311509	0.355226	1.06278	0.0878437	0.859819	0.907328	-0.140303	0.355226
ILMN_2406873	ARFGAP1	55738	1.09733	0.134	0.397218	0.609128	-0.715182	0.148915	0.833106	-0.263429	0.267257	1.07492	0.104234	0.859819	1.27398	0.349347	0.464214
ILMN_1769250	ARFGAP2	84364	0.944747	-0.082	0.588937	0.743201	-0.428175	0.0808556	0.771059	-0.375086	0.0644577	0.819681	-0.286866	0.157704	0.850406	-0.233776	0.355226
ILMN_1731287	ARFGAP3	26286	0.765779	-0.385	0.006485	0.886953	-0.173071	0.662521	0.794717	-0.331486	0.0265003	0.914578	-0.128821	0.536499	0.81947	-0.287237	0.0644577
ILMN_2221408	ARFGEF1	10565	1.06807	0.095	0.534155	0.912929	-0.131426	0.382733	0.674623	-0.567847	0.0265003	0.875469	-0.191873	0.216373	0.850851	-0.233021	0.0644577
ILMN_1789990	ARFGEF2	10564	1.20999	0.275	0.055656	1.07213	0.100481	1	1.13008	0.17643	0.853307	0.823791	-0.279651	0.596242	0.86832	-0.203701	0.711531
ILMN_2403911	ARFIP1	27236	1.24315	0.314	0.031141	1.15561	0.208651	1	0.848803	-0.236498	0.355226	0.636844	-0.650987	0.105193	0.772523	-0.372351	0.0419616
ILMN_1750690	ARFIP2	23647										0.856624	-0.223266	1
ILMN_1703989	ARFRP1	10139	1.00975	0.014	0.947866
ILMN_1800898	ARG2	384	0.971307	-0.042	0.80697	0.84369	-0.245216	0.662521	0.817062	-0.291482	0.5791	0.793664	-0.333399	0.0933977	0.768616	-0.379666	0.195562
ILMN_1707529	ARG99	NA	0.986233	-0.02	0.940205
ILMN_1788468	ARGLU1	55082	1.03097	0.044	0.841937	0.900621	-0.151008	0.662521	0.845198	-0.242639	0.0644577	0.920467	-0.119562	0.331387	0.863823	-0.211193	0.139087
ILMN_1732060	ARHGAP1	392	0.634635	-0.656	0.000896	0.826365	-0.275149	0.19043	0.779511	-0.359358	0.0960923	0.919728	-0.120722	0.479929	0.86758	-0.204931	0.267257
ILMN_1736112	ARHGAP10	79658	1.11651	0.159	0.311923	0.84707	-0.239447	1	0.764896	-0.386663	0.723674	1.08824	0.122	0.312321	0.982673	-0.0252166	0.723674
ILMN_2395913	ARHGAP11A	9824	1.074	0.103	0.455265	1.56076	0.642247	0.0808556	0.874228	-0.193918	0.0644577	0.819138	-0.287822	0.185326	0.546733	-0.871092	0.0189035
ILMN_2215881	ARHGAP11B	89839	1.00626	0.009	0.966164	0.736982	-0.440299	0.0808556	0.850069	-0.234349	0.254451	0.946585	-0.0791962	0.830324	1.09183	0.126753	0.518605
ILMN_1753500	ARHGAP12	94134	1.04972	0.07	0.719955	1.05759	0.0807866	1	1.04546	0.0641417	0.918707	0.841615	-0.248767	0.135833	0.876516	-0.190147	0.355226
ILMN_2208413	ARHGAP15	55843	0.98214	-0.026	0.916546	1.0086	0.0123556	1	0.804881	-0.313152	0.267257	0.805444	-0.312144	0.723932	0.642758	-0.637652	0.195562
ILMN_1718610	ARHGAP17	55114	0.785672	-0.348	0.004834	0.843683	-0.245227	0.382733	0.880343	-0.183863	0.0960923	0.820801	-0.284896	0.13332	0.87337	-0.195336	0.195562
ILMN_1791186	ARHGAP18	93663	0.91067	-0.135	0.392458	0.947893	-0.0772045	0.77283	0.671265	-0.575045	0.361935	1.03991	0.0564556	0.898327	0.736427	-0.441385	0.0570399
ILMN_1688953	ARHGAP19	84986	1.14552	0.196	0.274773	0.902969	-0.147252	0.662521	0.879637	-0.18502	0.355226	0.772218	-0.37292	0.13332	0.752264	-0.410689	0.01623
ILMN_1782761	ARHGAP20	57569	0.998615	-0.002	0.993844
ILMN_1811592	ARHGAP21	57584	1.06955	0.097	0.567147	1.00602	0.00865276	1	0.922245	-0.116778	0.355226	0.880585	-0.183466	0.0636898	0.807259	-0.308897	0.0265003
ILMN_1676361	ARHGAP22	58504	0.866337	-0.207	0.265377				1.07725	0.107347	0.540291
ILMN_1764571	ARHGAP23	57636	0.784584	-0.35	0.015108	0.79147	-0.337392	0.0808556	0.750985	-0.413145	0.267257	0.882123	-0.180948	0.289315	0.837	-0.2567	0.139087
ILMN_2352633	ARHGAP24	83478	0.946714	-0.079	0.611995
ILMN_1661971	ARHGAP25	9938	0.969962	-0.044	0.835522				0.72349	-0.466955	0.148915	1.35106	0.434087	0.0808556
ILMN_2103362	ARHGAP27	201176	1.13053	0.177	0.301147	0.923817	-0.114322	1	0.922608	-0.116211	1	1.02048	0.029243	0.723932	1.01914	0.0273537	1
ILMN_2290204	ARHGAP28	79822	1.10803	0.148	0.279741
ILMN_2408851	ARHGAP30	257106	0.933033	-0.1	0.619621							0.851354	-0.232169	0.315302
ILMN_1770824	ARHGAP4	393	1.07103	0.099	0.6504	0.995688	-0.00623412	0.382733	1.01825	0.0260876	0.5791	0.838824	-0.253559	0.791082	0.857829	-0.221238	0.5791
ILMN_2322747	ARHGAP5	394	0.938221	-0.092	0.654061	0.792407	-0.335687	1	0.942171	-0.0859385	1
ILMN_2388746	ARHGAP6	395	0.866938	-0.206	0.141964
ILMN_2342851	ARHGAP8	23779	0.969962	-0.044	0.849848	0.986954	-0.0189457	0.662521	0.651639	-0.617855	0.133614	0.935272	-0.0965416	0.250998	0.852687	-0.229912	0.355226
ILMN_1663916	ARHGAP9	64333	1.12428	0.169	0.415115	0.846771	-0.239956	1	1.22621	0.294208	0.540291	0.707136	-0.49994	0.77283	1.02401	0.034224	1
ILMN_1734742	ARHGDIA	396	1.07773	0.108	0.59579	0.680845	-0.554601	0.19043	0.629475	-0.667779	0.0644577	1.02741	0.0390168	0.479929	0.949894	-0.0741612	0.267257
ILMN_1678143	ARHGDIB	397	0.805524	-0.312	0.026368	0.853264	-0.228936	0.662521	0.77398	-0.369632	0.267257	0.990346	-0.0139952	0.377225	0.898325	-0.154691	0.0960923
ILMN_1711278	ARHGDIG	398							0.658387	-0.602992	0.288844
ILMN_1772370	ARHGEF1	9138	1.232	0.301	0.053646	0.713893	-0.48622	0.0808556	0.806921	-0.3095	0.0644577	0.785295	-0.348694	0.377225	0.780347	-0.357813	0.195562
ILMN_2132809	ARHGEF10	9639	0.786217	-0.347	0.003252	0.756757	-0.402097	0.662521	0.611878	-0.708684	0.01623	0.826516	-0.274885	0.0773886	0.668282	-0.581472	0.01623
ILMN_1727205	ARHGEF10L	55160	1.15749	0.211	0.162797	0.933793	-0.0988253	0.386476	0.638575	-0.647072	0.0570399	0.773934	-0.369718	0.430897	0.815639	-0.293996	0.245278
ILMN_2347380	ARHGEF11	9826	1.08373	0.116	0.555333	0.574351	-0.799995	0.0808556	0.633635	-0.658275	0.0419616	0.810765	-0.302645	0.157704	0.875462	-0.191884	0.459543
ILMN_1810712	ARHGEF12	23365	1.05044	0.071	0.649641	0.968534	-0.0461258	1	0.994497	-0.0079606	0.5791	0.811245	-0.30179	0.250998	0.832992	-0.263625	0.195562
ILMN_1669928	ARHGEF16	27237				0.834812	-0.260477	0.662521	0.779238	-0.359865	0.267257	0.978785	-0.0309358	0.596242	0.913627	-0.130324	0.355226
ILMN_1754562	ARHGEF17	9828	0.862143	-0.214	0.142673	0.879585	-0.185105	0.0808556	0.75873	-0.398341	0.139087	1.00878	0.0126147	0.536499	0.870175	-0.200622	0.139087
ILMN_1664016	ARHGEF18	23370	1.12584	0.171	0.252777	0.80806	-0.307466	0.19043	0.901777	-0.149157	0.267257	0.870098	-0.20075	0.377225	0.97101	-0.0424414	0.853307
ILMN_1808999	ARHGEF19	128272	1.03455	0.049	0.834693	0.793729	-0.333281	0.382733	0.810229	-0.303599	0.267257	0.919859	-0.120515	0.377225	0.93898	-0.0908332	0.711531
ILMN_1703477	ARHGEF2	9181	0.726483	-0.461	0.019013	0.921117	-0.118544	0.0808556	0.999736	-0.000380898	0.5791	0.880273	-0.183977	0.111961	0.955406	-0.0658145	0.5791
ILMN_1781010	ARHGEF3	50650	0.925304	-0.112	0.675735	0.965869	-0.0501007	0.662521	0.795777	-0.329565	0.0960923	0.992037	-0.0115336	0.479929	0.817337	-0.290998	0.0960923
ILMN_1708093	ARHGEF5	7984				1.09583	0.132024	1	1.0601	0.0842006	1	0.851487	-0.231943	0.0933977	0.823724	-0.279767	0.195562
ILMN_2214473	ARHGEF5L	NA				0.977274	-0.0331646	0.382733	0.999486	-0.000742132	0.711531	0.865374	-0.208604	0.13332	0.885042	-0.176181	0.267257
ILMN_1803423	ARHGEF6	9459	0.747425	-0.42	0.007548	1.06686	0.0933678	0.662521	0.88117	-0.182507	0.195562	0.870113	-0.200726	0.111961	0.718669	-0.476601	0.01623
ILMN_1796912	ARHGEF7	8874	1.10267	0.141	0.290186	0.933536	-0.0992219	0.662521	0.880972	-0.182832	0.355226	0.858015	-0.220925	0.426777	0.809703	-0.304535	0.267257
ILMN_1779370	ARHGEF9	23229	1.05117	0.072	0.617319	0.952067	-0.0708655	0.371093	0.681209	-0.55383	0.382733	0.981207	-0.0273704	0.361935	0.702059	-0.510335	0.19043
ILMN_1797341	ARID1A	8289	1.44393	0.53	0.001193	0.885054	-0.176163	0.382733	1.04445	0.0627489	0.711531	0.816918	-0.291736	0.289315	0.964047	-0.0528243	1
ILMN_1660433	ARID1B	57492	0.915099	-0.128	0.446947
ILMN_2182335	ARID2	196528	1.30767	0.387	0.01082	1.08578	0.118734	1	0.870692	-0.199765	0.267257	0.791073	-0.338117	0.0773886	0.622415	-0.68405	0.0265003
ILMN_1670130	ARID3A	1820	1.0203	0.029	0.895008	0.747284	-0.420271	0.19043	0.887174	-0.172712	0.853307	0.994892	-0.00738766	0.331387	1.18113	0.240172	0.5791
ILMN_1696956	ARID3B	10620	1.00139	0.002	0.991988	0.763295	-0.389687	0.19043	0.777684	-0.362745	0.0960923	0.803448	-0.315723	0.289315	0.818593	-0.288781	0.459543
ILMN_1810229	ARID4A	5926	0.926588	-0.11	0.512906	0.895216	-0.159692	0.382733	1.07411	0.103135	0.459543	0.795068	-0.330851	0.13332	0.910678	-0.134986	0.711531
ILMN_2269564	ARID4B	51742	1.42603	0.512	0.001639	0.907463	-0.140089	0.382733	0.868255	-0.203809	0.355226	0.814984	-0.295156	0.185326	0.931865	-0.101807	0.459543
ILMN_2415157	ARID5A	10865	0.991717	-0.012	0.95096
ILMN_1721626	ARID5B	84159	0.893785	-0.162	0.395481	0.94487	-0.081812	1	0.843804	-0.24502	0.195562	1.00257	0.00370501	0.479929	0.895334	-0.159503	0.267257
ILMN_1694219	ARIH1	25820	1.43993	0.526	5.8e-05	0.968857	-0.0456439	1	1.31105	0.390718	0.139087	0.831113	-0.266883	0.596242	1.12465	0.169479	0.139087
ILMN_1792825	ARIH2	10425	0.90689	-0.141	0.290186	0.795045	-0.330891	0.382733	0.740843	-0.43276	0.195562	1.04721	0.0665496	0.859819	0.975816	-0.0353194	0.711531
ILMN_1813091	ARL1	400	0.836246	-0.258	0.031351	0.739164	-0.436034	0.0808556	0.764583	-0.387255	0.0644577	0.899907	-0.152151	0.479929	0.930855	-0.103373	0.195562
ILMN_2403047	ARL13B	200894	1.01255	0.018	0.939062	0.976365	-0.0345081	1	0.71911	-0.475716	0.267257	1.03669	0.0519848	0.961627	0.763541	-0.389223	0.082731
ILMN_2232463	ARL14	80117										0.792933	-0.334729	0.665006
ILMN_2202967	ARL15	54622	0.976032	-0.035	0.84741	1.50086	0.585786	0.662521	0.821193	-0.284207	0.355226	0.980619	-0.028236	0.360644	0.659258	-0.601086	0.0419616
ILMN_1679917	ARL16	339231	1.00905	0.013	0.95414	0.983786	-0.0235834	0.382733	0.887828	-0.171648	0.0960923	0.859816	-0.217899	0.791082	0.947618	-0.0776231	0.5791
ILMN_3181503	ARL17B	100506084	0.866938	-0.206	0.15882	0.858023	-0.220911	0.19043	0.740124	-0.434161	0.105193	0.872242	-0.1972	0.185326	0.750698	-0.413696	0.139087
ILMN_1698680	ARL17P1	NA	0.898755	-0.154	0.230338	1.01456	0.0208544	1	0.803848	-0.315005	0.0960923	1.06266	0.0876766	0.929637	0.841956	-0.248183	0.0644577
ILMN_1787879	ARL2	402	1.08073	0.112	0.578729	1.03625	0.0513712	0.662521	1.02577	0.0367041	0.711531	0.957221	-0.0630756	0.658843	0.947539	-0.0777427	0.5791
ILMN_1755391	ARL2BP	23568	0.720465	-0.473	0.00593	1.17033	0.226912	1	0.945168	-0.0813573	0.355226	1.00572	0.00822629	1	0.812228	-0.300043	0.0644577
ILMN_1780444	ARL3	403	1.03958	0.056	0.803959	0.777854	-0.362429	0.0808556	0.768431	-0.380013	0.01623	0.986469	-0.0196546	0.596242	0.974518	-0.0372386	0.5791
ILMN_1704842	ARL4A	10124	1.08373	0.116	0.433564	0.837947	-0.25507	0.540291	0.899822	-0.152289	0.195562	0.768812	-0.379298	0.175244	0.799447	-0.322925	0.139087
ILMN_1768391	ARL4C	10123	1.05775	0.081	0.667267	1.04551	0.0642029	1							0.935069	-0.0968553	0.540291
ILMN_1719010	ARL4D	379	0.934975	-0.097	0.576897	0.881154	-0.182533	1	0.831361	-0.266452	0.459543	0.856268	-0.223866	0.723932	0.807881	-0.307785	0.459543
ILMN_2332558	ARL5A	26225	1.1599	0.214	0.584705	1.08986	0.124137	0.662521	0.783087	-0.352756	0.355226	0.90306	-0.147107	0.0636898	0.856459	-0.223543	0.0419616
ILMN_1680465	ARL5B	221079	1.13131	0.178	0.270747	1.11142	0.152409	0.662521	1.41427	0.500055	0.195562	0.966423	-0.0492728	0.536499	1.33348	0.415197	0.355226
ILMN_1679295	ARL5C	390790	0.907519	-0.14	0.306346
ILMN_2307266	ARL6	84100	1.02243	0.032	0.894273	1.0197	0.0281424	0.662521	0.735841	-0.442533	0.459543	0.864176	-0.210603	0.157704	0.623612	-0.681279	0.0419616
ILMN_2113362	ARL6IP1	23204	0.90689	-0.141	0.397258	1.43457	0.520622	0.662521	0.770477	-0.376175	0.0419616	0.981082	-0.0275546	0.536499	0.808288	-0.307059	0.0644577
ILMN_2393144	ARL6IP4	51329	0.86334	-0.212	0.497463	0.918508	-0.122636	0.0808556	0.821469	-0.283721	0.0419616	0.893077	-0.163143	0.250998	0.798725	-0.324229	0.0419616
ILMN_1769810	ARL6IP5	10550	0.776469	-0.365	0.001904	1.06721	0.0938385	0.662521	0.92155	-0.117865	0.459543	0.911764	-0.133268	0.426777	0.787323	-0.344972	0.0419616
ILMN_1797964	ARL6IP6	151188	1.3333	0.415	0.176775	1.1839	0.243553	0.662521	1.16868	0.224883	0.853307	0.760876	-0.394266	0.0340692	0.751093	-0.412936	0.0419616
ILMN_1659148	ARL8A	127829	1.1065	0.146	0.373789							0.944678	-0.0821061	1
ILMN_1752837	ARL8B	55207	1.1591	0.213	0.104048	1.19687	0.25927	0.662521	1.00147	0.00212049	1	0.928041	-0.10774	0.13332	0.776529	-0.364889	0.0644577
ILMN_1777691	ARL9	132946	1.24487	0.316	0.048735							1.63687	0.710938	1
ILMN_1722066	ARMC1	55156	1.00417	0.006	0.979831	0.966933	-0.0485127	0.382733	0.813677	-0.297472	0.0419616	0.919187	-0.121569	0.185326	0.773499	-0.370529	0.0419616
ILMN_1689296	ARMC10	83787	1.13053	0.177	0.246373	0.955293	-0.0659854	0.662521	0.775908	-0.366042	0.0265003	0.875873	-0.191207	0.0422601	0.711402	-0.491264	0.01623
ILMN_1779256	ARMC2	84071	1.04826	0.068	0.679835
ILMN_1697088	ARMC5	79798	1.35191	0.435	6.1e-05	1.00185	0.00266467	1	0.815103	-0.294946	0.288844	1.3166	0.396812	0.17791	1.07118	0.0992023	1
ILMN_1697118	ARMC6	93436	0.960595	-0.058	0.738603	0.930018	-0.10467	0.382733	0.796099	-0.328981	0.267257	1.05495	0.077175	0.723932	0.903042	-0.147136	0.0960923
ILMN_1797298	ARMC7	79637	0.967276	-0.048	0.780213	0.997731	-0.00327714	0.662521	0.980254	-0.0287725	1	1.11404	0.155804	0.658843	1.09453	0.130309	0.459543
ILMN_2385318	ARMC8	25852	1.05336	0.075	0.65223	0.735685	-0.44284	0.382733	0.667226	-0.583751	0.125786	0.802374	-0.317653	0.13332	0.755109	-0.405244	0.0960923
ILMN_1755732	ARMC9	80210	0.998615	-0.002	0.991916	0.884044	-0.177811	0.540291	1.32569	0.406747	0.846451	0.601647	-0.733011	0.235333	0.902217	-0.148454	0.2113
ILMN_1788192	ARMCX1	51309	0.775393	-0.367	0.003936	1.21191	0.277286	0.662521	2.0047	1.00339	0.0419616	0.895844	-0.158681	0.426777	1.44954	0.535594	0.0265003
ILMN_1785170	ARMCX2	9823				1.2541	0.326651	0.662521	1.18072	0.239669	0.459543	0.877536	-0.18847	0.13332	0.826191	-0.275453	0.0644577
ILMN_2334760	ARMCX3	51566	0.757858	-0.4	0.008831	0.790771	-0.338668	0.698535	1.06826	0.0952661	0.55569	0.79751	-0.326425	0.112351	0.895305	-0.159549	0.125786
ILMN_1741156	ARMCX5	64860	1.01889	0.027	0.888586	0.820494	-0.285436	0.662521	1.26553	0.339746	0.459543	0.948127	-0.0768472	0.536499	1.4624	0.548334	0.355226
ILMN_1716026	ARMCX6	54470	0.721965	-0.47	0.000161	0.920853	-0.118958	0.245278	1.16144	0.215921	0.355226	0.66783	-0.582447	0.19043	1.20772	0.272288	0.711531
ILMN_2183510	ARMET	NA	0.916369	-0.126	0.632778	0.949427	-0.0748716	0.662521	0.840648	-0.250426	0.0960923	0.966795	-0.0487183	0.929637	0.856027	-0.224273	0.459543
ILMN_1762582	ARNT	405	1.15269	0.205	0.101537	0.759698	-0.396503	0.698535	1.08078	0.112076	0.711531	0.866033	-0.207506	0.215925	1.08581	0.118778	0.77283
ILMN_1718046	ARNT2	9915	0.93174	-0.102	0.64689
ILMN_2405305	ARNTL	406	1.11884	0.162	0.25086	0.795338	-0.33036	0.382733	1.07008	0.0977254	1	0.824918	-0.277676	0.250998	1.10988	0.150409	1
ILMN_1798064	ARNTL2	56938	1.05995	0.084	0.695446
ILMN_3185198	ARP11	NA	0.903127	-0.147	0.245006	0.993556	-0.00932656	0.662521	0.895871	-0.158637	0.459543	0.898156	-0.154963	0.961627	0.80985	-0.304273	0.918707
ILMN_1759915	ARPC1A	10552	0.722465	-0.469	0.002332	0.80417	-0.314428	0.19043	0.752202	-0.410808	0.0265003	0.991028	-0.0130024	0.536499	0.926985	-0.109382	0.267257
ILMN_2085760	ARPC1B	10095	0.896888	-0.157	0.411104	0.813275	-0.298185	0.0808556	0.956832	-0.0636629	0.459543	0.824472	-0.278458	0.13332	0.970005	-0.043936	0.853307
ILMN_1792489	ARPC2	10109	0.895646	-0.159	0.257636	0.784386	-0.350364	0.0808556	0.790463	-0.33923	0.01623	0.878931	-0.186179	0.216373	0.88574	-0.175044	0.267257
ILMN_1655561	ARPC3	10094	0.850274	-0.234	0.364793	0.889238	-0.169359	0.382733	0.850078	-0.234333	0.0960923	0.911745	-0.133297	0.0272754	0.871595	-0.198271	0.0419616
ILMN_1707336	ARPC4	10093	0.711532	-0.491	0.000167	0.874757	-0.193046	0.382733	0.920083	-0.120164	0.195562	0.911446	-0.13377	0.0773886	0.958673	-0.0608886	0.139087
ILMN_1768394	ARPC5	10092	0.619424	-0.691	4.2e-05	1.12321	0.167624	0.662521	0.996628	-0.004873	0.355226	0.873525	-0.195079	0.13332	0.775084	-0.367576	0.0265003
ILMN_2043816	ARPC5L	81873	1.19665	0.259	0.104582	0.76719	-0.382345	0.0808556	0.679159	-0.55818	0.01623	1.04087	0.0577908	0.658843	0.921436	-0.118044	0.711531
ILMN_1782810	ARPM1	NA	1.00556	0.008	0.977098	0.993796	-0.00897809	0.77283	0.860126	-0.21738	0.846451	1.19139	0.25264	0.676103	1.03114	0.0442391	1
ILMN_1776442	ARPM2	NA	0.927874	-0.108	0.470734
ILMN_2059505	ARPP19	10776	1.07848	0.109	0.501383	0.999943	-8.21584e-05	0.662521	0.733	-0.448114	0.0960923	0.925383	-0.111878	0.250998	0.791003	-0.338245	0.0960923
ILMN_1672161	ARPP-21	NA	0.82645	-0.275	0.015669							1.08692	0.120247	0.386476
ILMN_1730620	ARRB1	408	0.82302	-0.281	0.034812	0.939583	-0.0899075	0.0808556	0.823921	-0.279421	0.01623	0.988889	-0.016119	0.596242	0.867158	-0.205633	0.139087
ILMN_1675866	ARRB2	409	0.99447	-0.008	0.974128							1.27554	0.351114	0.371093	1.00009	0.000132984	1
ILMN_1661492	ARRDC1	92714				0.958878	-0.0605809	1	0.818923	-0.288201	0.139087	0.900511	-0.151184	0.596242	0.769075	-0.378805	0.0419616
ILMN_1710229	ARRDC2	27106	1.21419	0.28	0.13035	0.716673	-0.480614	0.148915	1.25863	0.331854	0.361935	0.903833	-0.145873	0.157704	0.771686	-0.373914	0.0960923
ILMN_2198515	ARRDC3	57561	0.837987	-0.255	0.059163	2.97879	1.57472	0.662521	3.4032	1.76689	0.139087	0.695678	-0.523509	0.148915	1.25566	0.328445	0.5791
ILMN_1660544	ARRDC4	91947	0.918913	-0.122	0.438005	1.09408	0.129723	0.662521	0.842691	-0.246924	0.125786	1.24343	0.314328	0.701478	0.812794	-0.299039	0.474959
ILMN_2358202	ARS2	NA	0.976708	-0.034	0.832307	0.867913	-0.204378	0.662521	0.962669	-0.0548878	0.853307	0.948543	-0.0762151	0.658843	1.0521	0.0732753	0.711531
ILMN_1656477	ARSA	410	0.91955	-0.121	0.48276	1.26426	0.338297	0.245278	0.805417	-0.312192	0.332922	0.899241	-0.153221	0.371093	0.572874	-0.803709	0.148915
ILMN_1722045	ARSB	411	0.903127	-0.147	0.276642	0.818121	-0.289613	0.19043	0.718055	-0.477833	0.0419616	0.827924	-0.27243	0.29627	0.788388	-0.343023	0.139087
ILMN_1684873	ARSD	414	1.07773	0.108	0.545103	0.739996	-0.43441	0.0808556	0.802719	-0.317032	0.0960923	0.911298	-0.134005	0.215925	0.932114	-0.101421	0.361935
ILMN_1720604	ARSG	22901	0.957272	-0.063	0.733361	0.879487	-0.185266	0.0808556	0.659556	-0.600432	0.01623	1.04383	0.0618875	0.791082	0.782803	-0.353278	0.0265003
ILMN_1679318	ARSJ	79642	0.844401	-0.244	0.086238
ILMN_1657050	ARSK	153642	0.759436	-0.397	0.005676	0.737179	-0.439912	0.0808556	0.725667	-0.46262	0.0419616	0.90172	-0.149249	0.0773886	0.887638	-0.171957	0.267257
ILMN_1807913	ART1	417	0.916369	-0.126	0.505326	0.735961	-0.442299	0.19043	0.578033	-0.790776	0.0644577	1.01974	0.028203	0.859819	0.800918	-0.320274	0.0960923
ILMN_1805773	ART4	420													0.882037	-0.18109	1
ILMN_1803691	ARTN	9048				0.719062	-0.475812	0.662521	0.745608	-0.423511	0.355226	0.8121	-0.300271	0.0340692	0.84208	-0.24797	0.0644577
ILMN_1800935	ARV1	64801	1.1235	0.168	0.255777	0.993965	-0.00873273	0.662521	0.958836	-0.060644	0.267257	0.972151	-0.0407472	0.658843	0.937793	-0.0926584	0.267257
ILMN_1677226	ARVCF	421	1.10573	0.145	0.363887
ILMN_3307108	ARVP6125	NA	1.01748	0.025	0.90695							0.875767	-0.191381	0.376759	0.814364	-0.296254	0.371093
ILMN_1724162	ARX	170302										0.901044	-0.15033	0.233038	0.952691	-0.0699195	0.77283
ILMN_1771732	AS3MT	57412	0.931095	-0.103	0.469122	0.967531	-0.0476202	0.662521	0.772213	-0.372928	0.139087	0.862224	-0.213866	0.479929	0.688165	-0.539174	0.195562
ILMN_1684054	ASAH1	427	0.874179	-0.194	0.201606	0.937261	-0.0934776	0.382733	0.959993	-0.0589048	0.267257	0.776473	-0.364992	0.0636898	0.795305	-0.330419	0.139087
ILMN_1780786	ASAH2	56624	0.976032	-0.035	0.861741
ILMN_3242048	ASAH2C	NA				1.27781	0.353678	1	1.00688	0.00989652	0.918707	0.804466	-0.313896	0.227147	0.633898	-0.657677	0.082731
ILMN_1656248	ASAM	NA	1.19003	0.251	0.145081
ILMN_2233366	ASAP1	50807	1.17365	0.231	0.116851	0.903407	-0.146552	0.382733	0.813817	-0.297223	0.01623	0.804607	-0.313643	0.216373	0.524369	-0.931347	0.0265003
ILMN_3194508	ASAP2	8853	0.74072	-0.433	0.000213	0.945729	-0.0805018	1	0.614306	-0.70297	0.195562	1.04198	0.0593236	0.791082	0.700474	-0.513597	0.139087
ILMN_1685441	ASAP3	55616	0.656106	-0.608	1.6e-05	0.878351	-0.18713	0.662521	0.791277	-0.337745	0.195562	0.917655	-0.123976	0.377225	0.826684	-0.274591	0.0419616
ILMN_1683096	ASB1	51665	0.942131	-0.086	0.727806	0.757344	-0.40098	0.662521	0.750893	-0.41332	0.355226	1.1051	0.144182	1	1.09569	0.131841	1
ILMN_1781148	ASB10	136371	0.96393	-0.053	0.759645
ILMN_1651643	ASB11	140456	1.04536	0.064	0.718721
ILMN_1654385	ASB13	79754	1.06363	0.089	0.736424	0.91804	-0.123371	0.0808556	0.836895	-0.256882	0.195562	0.866323	-0.207023	0.0933977	0.789749	-0.340534	0.139087
ILMN_1810881	ASB16	92591	0.896267	-0.158	0.368831										0.964464	-0.0522002	1
ILMN_1670829	ASB17	127247	0.976708	-0.034	0.86209
ILMN_1699606	ASB3	51130	1.08749	0.121	0.426614	0.634464	-0.656389	0.0808556	0.685413	-0.544955	0.01623	0.747939	-0.419006	0.148011	0.737283	-0.439709	0.0265003
ILMN_1702618	ASB4	51666	1.08073	0.112	0.501939
ILMN_2397776	ASB6	140459	1.3491	0.432	0.000228	0.834321	-0.261326	0.662521	0.953066	-0.0693519	1	1.06111	0.0855795	0.596242	1.21214	0.277554	0.267257
ILMN_1753040	ASB7	140460	0.966606	-0.049	0.812411	1.17761	0.235865	0.382733	1.06173	0.0864185	0.853307	0.947104	-0.0784056	0.846451	1.25846	0.331655	0.175244
ILMN_1783675	ASB8	140461	0.89751	-0.156	0.29879	0.966938	-0.0485045	0.0808556	0.862861	-0.212799	0.0644577	0.848576	-0.236884	0.0636898	0.757239	-0.401178	0.01623
ILMN_1786041	ASB9	140462							0.792698	-0.335156	1
ILMN_1685097	ASCC1	51008				0.930617	-0.10374	1	0.792604	-0.335328	0.139087	0.968369	-0.0463717	0.596242	0.824757	-0.27796	0.0644577
ILMN_1679919	ASCC2	84164	0.949342	-0.075	0.725641	0.892815	-0.163568	0.382733	0.871103	-0.199085	0.195562	0.96322	-0.0540624	0.791082	0.939797	-0.0895796	0.459543
ILMN_1745772	ASCC3	10973	1.31859	0.399	0.00324	0.702103	-0.510245	0.0808556	0.612299	-0.707692	0.01623	1.02114	0.0301809	0.377225	0.72212	-0.46969	0.0265003
ILMN_1723412	ASCL2	430	1.01466	0.021	0.906207	1.01833	0.0262028	1	0.797609	-0.326247	0.267257	0.923762	-0.114407	0.791082	0.72354	-0.466856	0.0644577
ILMN_3261705	ASCL5	647219				1.04954	0.0697601	0.77283	0.978943	-0.0307031	0.561276	1.08876	0.122684	0.648077	1.01552	0.0222208	0.897279
ILMN_1714737	ASF1A	25842	1.07773	0.108	0.556469	0.98092	-0.0277933	1	0.85586	-0.224554	0.355226	0.980742	-0.0280538	0.536499	0.855705	-0.224814	0.0960923
ILMN_1695414	ASF1B	55723	0.96393	-0.053	0.882394	0.771759	-0.373777	0.382733	0.685647	-0.544462	0.0644577	1.03718	0.0526668	0.859819	0.921453	-0.118018	0.459543
ILMN_3259153	ASFMR1	NA	1.04464	0.063	0.724281
ILMN_1769013	ASGR1	432	1.24574	0.317	0.092635							0.802218	-0.317933	0.662521
ILMN_1700340	ASGR2	433										1.30113	0.379766	1	1.29604	0.374112	1
ILMN_1782032	ASH1L	55870	1.07177	0.1	0.493769	1.18333	0.242852	0.662521	1.00627	0.00901093	0.853307	0.793766	-0.333215	0.377225	0.674993	-0.567056	0.267257
ILMN_1666933	ASH2L	9070	1.1487	0.2	0.124064	0.893125	-0.163065	0.662521	0.831214	-0.266708	0.267257	0.925481	-0.111724	0.377225	0.861327	-0.215367	0.267257
ILMN_1685037	ASL	435	0.93045	-0.104	0.656556	0.942134	-0.0859964	0.382733	0.805206	-0.31257	0.0419616	0.716888	-0.480181	0.109819	0.902607	-0.147831	0.195562
ILMN_1804384	ASMTL	8623	0.903753	-0.146	0.474751	0.878589	-0.18674	0.382733	0.595207	-0.748537	0.111612	1.02785	0.0396301	0.723932	0.662468	-0.594078	0.01623
ILMN_1657571	ASNA1	NA	1.09354	0.129	0.650862	0.802555	-0.317327	0.382733	0.561817	-0.831829	0.01623	0.98223	-0.0258678	1	0.687595	-0.54037	0.0960923
ILMN_2398107	ASNS	440	1.14631	0.197	0.257209	0.914701	-0.128628	0.382733	1.01246	0.0178581	0.459543	0.842056	-0.248012	0.185326	1.03061	0.0435049	0.711531
ILMN_2221673	ASNSD1	54529	1.07773	0.108	0.514075	1.00415	0.00596886	1	1.05399	0.0758634	0.853307	1.02381	0.033951	0.791082	1.07463	0.103845	0.853307
ILMN_1692824	ASPA	443	0.99447	-0.008	0.972999
ILMN_3246037	ASPG	374569				0.806453	-0.310337	0.540291	0.634318	-0.656722	0.0813611	0.909143	-0.13742	1	0.715089	-0.483805	1
ILMN_1739719	ASPH	444	0.92723	-0.109	0.377488	0.755292	-0.404893	1	0.857445	-0.221883	0.5791	0.80997	-0.30406	0.331387	0.919518	-0.12105	0.5791
ILMN_1708950	ASPHD1	253982	0.898132	-0.155	0.323851	0.754528	-0.406354	0.382733	0.733094	-0.44793	0.139087	0.809791	-0.304379	0.479929	0.786787	-0.345955	0.355226
ILMN_2167426	ASPHD2	57168	1.11034	0.151	0.610007
ILMN_1815184	ASPM	259266	1.01607	0.023	0.956811	0.97653	-0.0342636	1	0.860002	-0.217588	0.139087	0.919967	-0.120346	0.216373	0.810189	-0.30367	0.01623
ILMN_1688180	ASPSCR1	79058	1.18181	0.241	0.057894	1.10679	0.146382	0.0808556	0.675631	-0.565692	0.139087	0.843101	-0.246223	0.746886	0.738253	-0.437812	0.01623
ILMN_1810199	ASRGL1	80150				1.37756	0.462119	0.77283	1.31614	0.396314	0.0808556	1.14223	0.191853	0.77283	1.0913	0.126047	0.698535
ILMN_1688234	ASS1	445	0.918913	-0.122	0.446873	0.783762	-0.351513	0.0808556	0.663307	-0.592252	0.01623	0.84625	-0.240845	0.0520588	0.745877	-0.422991	0.01623
ILMN_1803813	ASTE1	28990	1.00765	0.011	0.960235	0.819976	-0.286346	0.662521	1.0165	0.0236047	0.711531	1.04595	0.0648158	0.723932	1.29663	0.374766	0.459543
ILMN_1728055	ASTL	431705	1.00347	0.005	0.982632
ILMN_1702189	ASTN1	460	0.943438	-0.084	0.54358
ILMN_1744118	ASTN2	23245	0.980099	-0.029	0.878357	0.728493	-0.457014	0.0808556	0.636196	-0.652458	0.01623	1.19705	0.259489	0.0368884	0.800304	-0.321379	0.0419616
ILMN_1726025	ASXL1	171023	0.957935	-0.062	0.741498	0.816206	-0.292995	0.0808556	0.759507	-0.396864	0.0644577	0.857227	-0.222251	0.479929	0.797678	-0.326121	0.195562
ILMN_1698968	ASXL2	55252	1.64718	0.72	1e-06	0.81279	-0.299045	0.382733	0.810712	-0.302739	0.459543	0.942224	-0.0858582	0.157704	0.939815	-0.0895517	0.355226
ILMN_1782246	ASZ1	136991	0.936921	-0.094	0.514806
ILMN_1654497	ATAD1	84896	1.03742	0.053	0.762198	0.807154	-0.309083	0.382733	0.759138	-0.397566	0.267257	0.989148	-0.0157416	0.185326	0.778739	-0.360789	0.139087
ILMN_2048700	ATAD2	29028	1.20581	0.27	0.124321	0.985101	-0.0216569	0.662521	0.755504	-0.404488	0.355226	1.02898	0.0412152	0.596242	0.789157	-0.341616	0.195562
ILMN_3235282	ATAD2B	54454	1.23029	0.299	0.057569	0.858144	-0.220708	0.19043	0.84608	-0.241134	0.195562	1.01274	0.0182642	1	0.998503	-0.0021618	1
ILMN_1738530	ATAD3A	55210	0.992404	-0.011	0.96667	0.932433	-0.100928	0.382733	0.731625	-0.450823	0.0644577	0.962455	-0.0552095	0.723932	0.755181	-0.405105	0.139087
ILMN_2131936	ATAD3B	83858	1.21167	0.277	0.033057
ILMN_2231569	ATAD3C	219293				0.720677	-0.472575	1	0.708557	-0.497045	0.540291	1.36704	0.451055	0.245278	1.34405	0.426585	0.540291
ILMN_1812479	ATE1	11101	1.05555	0.078	0.667878	0.963	-0.0543925	1	0.877081	-0.189218	0.355226	0.991081	-0.0129244	0.540291	0.772567	-0.372268	0.195562
ILMN_1801923	ATF1	466	0.990343	-0.014	0.951076	0.795999	-0.329161	0.662521	1.14473	0.195005	0.853307	0.93052	-0.103891	0.791082	1.33818	0.420275	0.355226
ILMN_1748271	ATF2	1386	1.01115	0.016	0.941643	1.19231	0.253754	0.662521	1.42727	0.513254	0.267257	0.889243	-0.169351	0.185326	1.06448	0.0901489	0.459543
ILMN_2374865	ATF3	467	1.59549	0.674	0.000176	1.62609	0.701408	0.19043	1.34289	0.425336	0.355226	1.23538	0.304954	0.331387	1.02022	0.0288824	0.5791
ILMN_1672128	ATF4	468	1.37936	0.464	0.003834	0.969751	-0.044313	0.662521	1.11789	0.16078	0.355226	1.08155	0.113106	0.596242	1.22554	0.293413	0.355226
ILMN_1669113	ATF5	22809	0.851454	-0.232	0.110066	0.916302	-0.126105	0.382733	0.857156	-0.22237	0.139087	0.900045	-0.151931	0.426777	0.841948	-0.248196	0.267257
ILMN_1703471	ATF6	22926	0.91067	-0.135	0.334104	0.914152	-0.129494	0.662521	0.780748	-0.357071	0.267257	0.879519	-0.185213	0.289315	0.75117	-0.412789	0.01623
ILMN_3194911	ATF6B	1388	0.871154	-0.199	0.147992	0.800266	-0.321448	0.382733	0.752183	-0.410844	0.459543	0.760297	-0.395365	0.0933977	0.823742	-0.279735	0.267257
ILMN_1706967	ATF7	11016				0.670161	-0.577419	0.148915	0.733782	-0.446577	0.305507	0.985782	-0.0206601	0.870991	1.07936	0.110182	0.136037
ILMN_1716435	ATF7IP	55729	0.866337	-0.207	0.097199
ILMN_1804445	ATF7IP2	80063	0.998615	-0.002	0.990753	0.911281	-0.134033	0.662521	1.0658	0.0919321	0.853307	0.821176	-0.284237	0.0921936	0.960414	-0.0582719	0.759463
ILMN_2206098	ATG10	83734				0.692752	-0.529589	0.19043	0.496113	-1.01126	0.01623	0.767937	-0.38094	0.658843	0.75105	-0.41302	0.0265003
ILMN_1673898	ATG12	9140				0.873536	-0.195061	1	1.10947	0.149876	0.355226	0.856754	-0.223048	1	1.01448	0.0207395	0.459543
ILMN_2365881	ATG16L1	55054	1.20497	0.269	0.030874	0.888479	-0.17059	0.19043	0.951299	-0.0720292	0.5791	0.913787	-0.130071	0.111961	0.978395	-0.0315105	0.853307
ILMN_1664644	ATG16L2	89849	0.84148	-0.249	0.075457	0.714754	-0.48448	0.0808556	0.776842	-0.364308	0.0265003	0.972642	-0.0400195	0.479929	1.05713	0.0801535	0.853307
ILMN_1756006	ATG2A	23130	1.05848	0.082	0.72241	0.703274	-0.507842	0.662521	0.733653	-0.446831	0.355226	0.909478	-0.13689	0.723932	0.948764	-0.0758788	0.459543
ILMN_1735006	ATG2B	55102	1.00835	0.012	0.957111	0.770307	-0.376495	0.382733	1.05412	0.076035	0.853307	0.704981	-0.504343	0.0485396	0.964723	-0.0518136	0.759463
ILMN_2163732	ATG3	64422	1.15029	0.202	0.135813	0.873236	-0.195557	0.19043	0.797145	-0.327087	0.0960923	0.940821	-0.0880073	0.250998	0.858841	-0.219536	0.0960923
ILMN_2313782	ATG4A	115201				0.714351	-0.485295	0.382733	0.882943	-0.179607	0.0265003	0.9032	-0.146883	0.479929	0.773205	-0.371078	0.0644577
ILMN_2411915	ATG4B	23192	1.34071	0.423	0.007798	1.00611	0.00878672	1	0.839941	-0.251639	0.267257	0.967899	-0.0470709	0.479929	0.808042	-0.307497	0.0419616
ILMN_1700923	ATG4C	84938	0.999307	-0.001	0.996388	1.0702	0.09788	0.662521	0.926669	-0.109874	0.5791	0.831804	-0.265684	0.13332	0.720246	-0.473438	0.0265003
ILMN_2180315	ATG4D	84971	1.1479	0.199	0.080336	0.99698	-0.00436333	0.662521	0.875223	-0.192278	0.459543	0.910818	-0.134765	0.658843	0.806694	-0.309906	0.195562
ILMN_1718265	ATG5	9474	0.873573	-0.195	0.202137	0.949801	-0.0743031	1	0.802776	-0.316931	0.355226	0.961986	-0.0559127	0.658843	0.813075	-0.29854	0.0960923
ILMN_1790978	ATG7	10533	0.825878	-0.276	0.127882	0.837883	-0.255179	0.382733	0.704644	-0.505033	0.0960923	1.09759	0.13434	0.791082	0.923054	-0.115514	0.459543
ILMN_1739008	ATG9A	79065	1.35097	0.434	0.005045	0.770164	-0.376763	0.19043	0.6069	-0.72047	0.0419616	1.03434	0.048709	0.426777	0.815073	-0.294998	0.0960923
ILMN_1794707	ATHL1	NA	0.90689	-0.141	0.303918
ILMN_1673991	ATIC	471	1.2605	0.334	0.007008	1.02194	0.0313146	1	0.826957	-0.274116	0.267257	0.948978	-0.0755539	0.479929	0.767913	-0.380985	0.139087
ILMN_3181411	ATL1	51062	0.860949	-0.216	0.201693	1.23347	0.302723	0.0808556	1.00414	0.00595469	0.5791	0.905513	-0.143193	0.111961	0.737155	-0.439961	0.01623
ILMN_1716384	ATL2	64225	1.34071	0.423	0.003533	0.895875	-0.158632	0.662521	0.915075	-0.128038	0.355226	0.882412	-0.180475	0.426777	0.901324	-0.149882	0.355226
ILMN_1751086	ATL3	25923	1.04608	0.065	0.648519	1.02108	0.0300889	0.662521	1.09601	0.132259	0.355226	0.946182	-0.0798101	0.479929	1.01562	0.0223598	0.853307
ILMN_1716231	ATM	472	0.970634	-0.043	0.841864	1.04301	0.0607514	1	0.828767	-0.270961	0.267257	0.968918	-0.0455542	0.157704	0.825869	-0.276016	0.195562
ILMN_1772540	ATMIN	23300	1.13761	0.186	0.295477	0.834557	-0.260917	0.662521	1.10897	0.149223	0.355226	0.882601	-0.180167	0.185326	1.10823	0.148251	0.459543
ILMN_1737833	ATN1	1822	1.06659	0.093	0.715505	0.689917	-0.535505	0.0808556	0.699586	-0.515427	0.0644577	0.917085	-0.124872	0.157704	0.929937	-0.104795	0.711531
ILMN_1752393	ATOH7	220202				0.927829	-0.108068	0.698535	0.793655	-0.333417	0.617075	1.16058	0.214845	0.768278	0.992746	-0.0105031	0.723674
ILMN_1654065	ATOH8	84913	1.03025	0.043	0.883665
ILMN_1670609	ATOX1	475	0.775393	-0.367	0.001744	0.951279	-0.07206	0.662521	0.826206	-0.275426	0.0419616	0.991876	-0.0117683	0.791082	0.861466	-0.215135	0.195562
ILMN_1813434	ATP10A	57194	1.13997	0.189	0.311923	0.96326	-0.0540029	0.382733	0.817167	-0.291298	0.0419616	1.26003	0.333458	0.0773886	1.06893	0.0961633	0.355226
ILMN_1658884	ATP11B	23200	0.96929	-0.045	0.839801	1.26633	0.340656	0.148915	0.879903	-0.184584	0.0770999	0.897796	-0.15554	0.426777	0.80454	-0.313763	0.139087
ILMN_1804137	ATP11C	286410	1.05555	0.078	0.64501	1.09571	0.131872	1	1.13946	0.188345	0.550985	0.785896	-0.34759	0.170904	0.817269	-0.291117	0.15558
ILMN_1687765	ATP12A	479	1.03025	0.043	0.824151
ILMN_2134224	ATP13A1	57130	0.945402	-0.081	0.596593	0.698175	-0.518339	0.19043	0.833189	-0.263284	0.195562	0.853027	-0.229337	0.111961	1.01799	0.025718	1
ILMN_1704164	ATP13A2	23400	0.938872	-0.091	0.652692	0.79287	-0.334844	0.382733	0.611513	-0.709544	0.0419616	0.957569	-0.0625519	0.289315	0.73854	-0.437252	0.139087
ILMN_1663684	ATP13A3	79572	0.992404	-0.011	0.956374	0.562761	-0.829405	0.19043	0.8182	-0.289475	0.267257	1.01017	0.0145961	0.885234	1.46869	0.554526	0.358326
ILMN_1731783	ATP1A1	476	0.820742	-0.285	0.080982	0.939839	-0.0895145	0.382733	0.791069	-0.338124	0.0644577	0.841853	-0.248359	0.157704	0.807338	-0.308756	0.0419616
ILMN_1689098	ATP1A3	478	0.891311	-0.166	0.272423	0.750795	-0.413509	0.662521	1.01403	0.0200978	0.494125	0.838645	-0.253869	0.416793	1.13268	0.179738	1
ILMN_2407824	ATP1B1	481	0.748462	-0.418	0.002945	0.878984	-0.18609	0.662521	0.621199	-0.686872	0.139087	1.00648	0.00931425	0.658843	0.711301	-0.491468	0.0419616
ILMN_1747271	ATP1B2	482	1.00765	0.011	0.962189
ILMN_1759628	ATP1B3	483	0.793884	-0.333	0.012299	0.989952	-0.01457	0.662521	0.919792	-0.120621	0.139087	0.873422	-0.195249	0.0340692	0.811521	-0.301299	0.0419616
ILMN_1788281	ATP2A1	487							1.10155	0.13953	1	0.877833	-0.187982	1
ILMN_1655884	ATP2A2	488	0.965936	-0.05	0.861661	0.837418	-0.25598	0.0808556	0.802112	-0.318124	0.0265003	0.799913	-0.322085	0.0933977	0.742843	-0.42887	0.01623
ILMN_1697827	ATP2A3	489	1.04536	0.064	0.752841	0.77568	-0.366467	0.19043	0.594337	-0.750646	0.0281858	0.913787	-0.130071	0.213399	0.726795	-0.46038	0.09329
ILMN_1750599	ATP2B1	490	0.877822	-0.188	0.230149	1.15315	0.205575	1	0.96072	-0.0578124	0.355226	1.1749	0.232544	0.594032	0.795648	-0.329797	0.215925
ILMN_1664772	ATP2B4	493	0.951318	-0.072	0.597261	1.09053	0.125032	0.662521	1.03636	0.0515258	0.5791	0.826903	-0.27421	0.250998	0.771003	-0.375192	0.0644577
ILMN_1696568	ATP2C1	27032	0.918913	-0.122	0.448874	1.14755	0.198563	0.382733	0.895076	-0.159917	0.355226	0.893208	-0.162933	0.250998	0.737093	-0.440081	0.0265003
ILMN_1785413	ATP2C2	9914				0.773181	-0.371121	0.0808556	0.60274	-0.730393	0.139087	1.18706	0.247399	0.929637	0.925386	-0.111873	0.853307
ILMN_1764494	ATP5A1	NA	1.13997	0.189	0.14317	0.875069	-0.192532	0.0808556	0.785896	-0.34759	0.01623	0.951146	-0.0722614	0.331387	0.862592	-0.21325	0.0419616
ILMN_1772132	ATP5B	NA	1.31312	0.393	0.007128	0.926658	-0.109891	0.382733	0.825404	-0.276827	0.0419616	0.921884	-0.117343	0.0933977	0.821152	-0.28428	0.0265003
ILMN_1701269	ATP5C1	NA	0.950659	-0.073	0.786812	0.842703	-0.246904	0.0808556	0.768208	-0.380431	0.0960923	1.02572	0.0366383	0.929637	0.935047	-0.0968891	0.0419616
ILMN_1679178	ATP5D	NA	1.05409	0.076	0.731516	0.814016	-0.296871	0.19043	0.727678	-0.458627	0.0644577	0.97292	-0.0396062	0.289315	0.869729	-0.201362	0.0419616
ILMN_3261197	ATP5E	NA	0.838568	-0.254	0.174091	0.839927	-0.251665	0.662521	0.909396	-0.137019	0.355226	0.831315	-0.266532	0.289315	0.900073	-0.151887	0.853307
ILMN_2225887	ATP5EP2	NA	0.833931	-0.262	0.023677	0.868578	-0.203273	0.19043	0.844463	-0.243894	0.0419616	0.920494	-0.11952	0.216373	0.836531	-0.257509	0.267257
ILMN_1721989	ATP5F1	NA	1.09051	0.125	0.545989	0.857762	-0.22135	0.382733	0.83176	-0.265761	0.01623	0.977026	-0.0335316	0.426777	0.769955	-0.377154	0.01623
ILMN_1676393	ATP5G1	NA	1.17365	0.231	0.133929	0.889743	-0.16854	0.662521	0.757601	-0.400491	0.01623	1.09324	0.12861	0.479929	0.798433	-0.324757	0.139087
ILMN_1660577	ATP5G2	NA	1.18345	0.243	0.023504	0.901448	-0.149683	0.382733	0.862603	-0.213231	0.0265003	1.05417	0.0761013	0.0773886	0.927335	-0.108837	0.195562
ILMN_1770466	ATP5G3	NA	1.02101	0.03	0.896144	1.07462	0.103821	1	0.907285	-0.140373	0.711531	1.02	0.0285647	0.479929	0.861171	-0.215629	0.0644577
ILMN_1666372	ATP5H	NA	1.04464	0.063	0.677381	0.896331	-0.157897	1	0.855809	-0.224639	0.139087	0.990449	-0.0138456	0.859819	0.889009	-0.169729	0.0419616
ILMN_1726603	ATP5I	NA	1.16635	0.222	0.125109	0.89925	-0.153206	0.382733	0.854048	-0.227611	0.0419616	0.791165	-0.33795	0.148011	0.756055	-0.403436	0.125786
ILMN_1652806	ATP5J	NA	0.777546	-0.363	0.015581	0.830829	-0.267376	0.662521	0.733358	-0.44741	0.459543	0.95543	-0.0657783	0.479929	0.753427	-0.40846	0.0644577
ILMN_2310621	ATP5J2	NA	1.01748	0.025	0.898954	0.856534	-0.223417	0.19043	0.731532	-0.451008	0.01623	0.967594	-0.0475263	0.331387	0.677311	-0.56211	0.01623
ILMN_1812638	ATP5L	NA	0.872968	-0.196	0.133436	1.01079	0.0154878	1	0.84629	-0.240776	0.0960923	0.932512	-0.100806	0.185326	0.780748	-0.35707	0.195562
ILMN_1791332	ATP5O	NA	1.09657	0.133	0.377305	0.914965	-0.128212	0.662521	0.841397	-0.249142	0.0265003	0.984586	-0.0224106	0.596242	0.90542	-0.143341	0.0960923
ILMN_1700625	ATP5S	NA	1.13603	0.184	0.186155	0.882428	-0.18045	0.0808556	0.747898	-0.419087	0.01623	1.02894	0.0411593	0.791082	0.827078	-0.273905	0.0419616
ILMN_1809027	ATP5SL	NA				0.984711	-0.0222282	0.662521	0.962891	-0.0545555	0.459543	0.904567	-0.144701	0.185326	0.884523	-0.177028	0.459543
ILMN_1697694	ATP6AP1	537	0.714993	-0.484	0.002143	0.821675	-0.28336	0.662521	0.749161	-0.416652	0.139087	0.930092	-0.104554	0.426777	0.848011	-0.237845	0.0644577
ILMN_1755990	ATP6AP1L	92270	1.0367	0.052	0.743258	0.687831	-0.539874	0.386476	0.711058	-0.49196	0.288844	0.779558	-0.359271	0.0385612	0.805883	-0.311358	0.0524795
ILMN_1677440	ATP6AP2	10159	0.74072	-0.433	0.004466	1.06179	0.0864952	1	0.974199	-0.037711	0.459543	0.938005	-0.0923324	0.426777	0.860628	-0.216539	0.139087
ILMN_1752579	ATP6V0A1	535	0.740207	-0.434	0.007485	0.795062	-0.33086	0.0808556	0.791896	-0.336618	0.0644577	0.885344	-0.175691	0.289315	0.881817	-0.181448	0.355226
ILMN_1700380	ATP6V0A2	23545	1.17202	0.229	0.111676	0.85776	-0.221355	0.0808556	0.87811	-0.187527	0.139087	1.02806	0.0399196	0.723932	1.05245	0.0737478	0.5791
ILMN_1721788	ATP6V0A4	50617	1.15589	0.209	0.08559
ILMN_2353642	ATP6V0B	533	1.11265	0.154	0.399551	0.839506	-0.252387	0.19043	0.971878	-0.0411525	0.459543	0.905215	-0.143668	0.426777	1.09311	0.128439	0.459543
ILMN_1773849	ATP6V0C	527	1.07029	0.098	0.658921	0.738845	-0.436656	0.0808556	0.8843	-0.177392	0.5791	0.889931	-0.168234	0.13332	1.158	0.21163	0.195562
ILMN_1795826	ATP6V0D1	9114	0.842647	-0.247	0.132793	0.999809	-0.000275246	0.662521	0.868928	-0.202691	0.139087	0.94672	-0.0789905	0.377225	0.822789	-0.281406	0.139087
ILMN_1799889	ATP6V0D2	245972				0.62177	-0.685547	0.0808556	0.723256	-0.467422	0.0960923	0.856085	-0.224175	0.536499	0.995815	-0.00605	1
ILMN_2071937	ATP6V0E1	8992	0.786762	-0.346	0.004574	0.941053	-0.087652	0.19043	0.744864	-0.424951	0.0960923	1.07984	0.110822	0.658843	0.897992	-0.155225	0.355226
ILMN_1785095	ATP6V0E2	155066	0.607097	-0.72	1.1e-05	0.82096	-0.284616	0.0808556	0.677581	-0.561536	0.0419616	1.05045	0.0710071	0.791082	0.86699	-0.205913	0.0644577
ILMN_1711516	ATP6V1A	523	0.702709	-0.509	4.5e-05	1.07295	0.101588	1	1.04218	0.0595993	0.5791	0.886771	-0.173367	0.0773886	0.861334	-0.215356	0.0419616
ILMN_1812073	ATP6V1B1	525	1.18345	0.243	0.076331	0.796518	-0.328221	0.662521	0.703943	-0.50647	0.195562	0.749866	-0.415296	0.0520588	0.662713	-0.593545	0.01623
ILMN_1787705	ATP6V1B2	526	1.41225	0.498	0.000227	0.920503	-0.119506	0.382733	1.00218	0.0031398	0.853307	0.955452	-0.0657443	0.658843	1.04023	0.0569012	0.711531
ILMN_1663257	ATP6V1C1	528	1.1042	0.143	0.411746	0.855062	-0.225899	0.382733	0.863292	-0.212079	0.195562	0.939666	-0.0897798	0.289315	0.948711	-0.0759594	0.459543
ILMN_1797310	ATP6V1D	51382	0.959929	-0.059	0.769113	0.953861	-0.0681492	0.382733	0.995803	-0.0060684	0.459543	0.856762	-0.223033	0.331387	0.894435	-0.160952	0.355226
ILMN_1798485	ATP6V1E1	529	0.832776	-0.264	0.035556	0.967031	-0.0483664	0.382733	0.931384	-0.102553	0.711531	0.848336	-0.237292	0.216373	0.965247	-0.0510297	0.853307
ILMN_1810235	ATP6V1E2	90423	1.22095	0.288	0.027574	1.06465	0.0903836	0.662521	1.52075	0.604787	0.0644577	0.983821	-0.023532	0.658843	1.40529	0.490871	0.195562
ILMN_2099783	ATP6V1F	9296	0.98214	-0.026	0.891521	0.846879	-0.239773	0.382733	0.876492	-0.190188	0.5791	0.952117	-0.0707892	0.331387	0.98541	-0.0212044	1
ILMN_1784523	ATP6V1G1	9550	1.00696	0.01	0.960037	0.870766	-0.199644	0.662521	0.916184	-0.126291	0.459543	0.978348	-0.031581	1	1.02938	0.0417711	1
ILMN_1654541	ATP6V1G2	534	0.869345	-0.202	0.159589	0.812769	-0.299083	0.662521	0.893026	-0.163225	0.853307	1.10561	0.144848	0.791082	1.21479	0.280706	0.711531
ILMN_2403730	ATP6V1H	51606	1.05629	0.079	0.768435	0.769671	-0.377687	0.0808556	0.72705	-0.459873	0.0265003	0.958199	-0.0616024	0.0933977	0.905139	-0.143789	0.0419616
ILMN_1808115	ATP7A	538	1.00139	0.002	0.993713
ILMN_1696223	ATP7B	540	0.967276	-0.048	0.787641	0.633974	-0.657505	0.19043	0.692357	-0.530413	0.0419616	0.776287	-0.365338	0.111961	0.847775	-0.238246	0.139087
ILMN_1778358	ATP8A1	10396				1.06576	0.0918771	1	1.01695	0.0242441	1	1.17746	0.235684	0.254451	1.12354	0.168051	1
ILMN_1693896	ATP8A2	51761	0.886382	-0.174	0.163604
ILMN_1710523	ATP8B1	5205	0.956608	-0.064	0.697311	0.71391	-0.486185	0.382733	0.761368	-0.393334	0.139087	0.87847	-0.186935	0.112351	0.936867	-0.0940841	0.474959
ILMN_1814688	ATP8B2	57198	0.924663	-0.113	0.507356	0.963397	-0.0537974	1	0.92269	-0.116083	0.5791	0.905825	-0.142696	0.0272754	0.86755	-0.204982	0.0644577
ILMN_1799232	ATP9A	10079	1.09885	0.136	0.426613	1.03245	0.0460653	1	0.974367	-0.0374625	0.459543	0.844557	-0.243733	0.216373	0.797048	-0.327261	0.5791
ILMN_1658684	ATP9B	374868	1.08147	0.113	0.397258	1.22242	0.28974	1	1.00357	0.00513558	0.723674	0.847369	-0.238938	0.749119	0.695662	-0.523542	0.2113
ILMN_1790603	ATPAF1	64756	0.967947	-0.047	0.850581	0.991127	-0.0128578	0.662521	0.942804	-0.0849708	0.459543	0.959572	-0.0595364	0.289315	0.859424	-0.218558	0.0960923
ILMN_1727390	ATPAF2	91647	1.03025	0.043	0.810972	1.01486	0.0212838	1	0.792928	-0.334739	0.195562	1.01095	0.0157182	0.536499	0.789875	-0.340305	0.139087
ILMN_1721741	ATPBD1B	NA	1.55617	0.638	6e-06	0.993159	-0.00990376	1	0.972613	-0.0400618	0.853307	0.935579	-0.0960689	0.426777	0.916224	-0.126227	0.195562
ILMN_1682375	ATPBD3	NA	1.19086	0.252	0.079455	0.977577	-0.0327179	0.662521	0.877553	-0.188442	0.0524795	1.13046	0.176908	0.271589	1.01479	0.0211834	1
ILMN_1782085	ATPBD4	NA				1.19999	0.263026	0.662521	0.802141	-0.318072	0.0960923	0.78766	-0.344354	0.216373	0.70788	-0.498424	0.0419616
ILMN_1725746	ATPGD1	NA							0.732537	-0.449027	0.540291	0.825435	-0.276773	0.698535
ILMN_1727332	ATPIF1	NA	0.725979	-0.462	0.000766	0.908915	-0.137783	0.382733	0.709295	-0.495542	0.0644577	0.830365	-0.268182	0.157704	0.761466	-0.393149	0.0265003
ILMN_2277201	ATR	545										0.679184	-0.558125	0.540291
ILMN_1653896	ATRIP	84126	1.36037	0.444	0.004339	0.999927	-0.000105706	1	0.832337	-0.264761	0.355226	0.824114	-0.279083	0.331387	0.932216	-0.101263	0.355226
ILMN_1678541	ATRN	8455	1.1042	0.143	0.309942	0.738378	-0.437568	0.382733	0.752162	-0.410885	0.0419616	0.762966	-0.390309	0.0773886	0.681365	-0.553501	0.01623
ILMN_1666885	ATRX	546	1.03958	0.056	0.745195							0.895262	-0.159618	1
ILMN_2153332	ATXN1	6310	0.944092	-0.083	0.567685	0.762942	-0.390355	0.0808556	0.726428	-0.461109	0.01623	0.883327	-0.178981	0.216373	0.800503	-0.321021	0.0644577
ILMN_2169676	ATXN10	25814	0.954621	-0.067	0.741716	1.08101	0.112377	0.662521	0.97823	-0.0317547	0.759463	0.791249	-0.337797	0.0773886	0.793067	-0.334485	0.0644577
ILMN_3233871	ATXN1L	342371	1.09657	0.133	0.477163	0.858998	-0.219274	0.662521	0.793567	-0.333577	0.355226	0.959524	-0.0596092	0.331387	0.886436	-0.173912	0.267257
ILMN_1743829	ATXN2	6311	1.28877	0.366	0.009685	0.850705	-0.23327	0.0808556	0.814941	-0.295232	0.355226	0.840318	-0.250993	0.331387	0.804991	-0.312956	0.5791
ILMN_2271627	ATXN2L	11273				0.717101	-0.479751	0.371093	1.17737	0.235568	0.459543	0.712033	-0.489985	0.157704	1.16905	0.225334	0.486234
ILMN_2393497	ATXN3	4287	1.30767	0.387	0.002832	1.01824	0.0260834	1	1.07106	0.0990421	0.853307	0.896812	-0.157122	0.929637	0.943331	-0.0841638	1
ILMN_1664177	ATXN7L2	127002	1.15109	0.203	0.080632	0.720201	-0.473529	0.245278	1.05121	0.0720496	0.883617	0.998086	-0.00276382	0.798298	1.45681	0.542814	0.883617
ILMN_1862018	ATXN7L3	56970	1.07252	0.101	0.607244	0.876781	-0.189711	0.382733	1.06172	0.0864064	0.853307	1.00656	0.0094298	0.658843	1.21887	0.285547	0.459543
ILMN_2231911	AUH	549	0.914465	-0.129	0.312212	0.999424	-0.000831228	1	0.866174	-0.207272	0.5791	0.811593	-0.301172	0.250998	0.703385	-0.507613	0.0419616
ILMN_1651378	AUP1	550	1.16635	0.222	0.128792	0.997011	-0.00431853	1	0.91141	-0.133827	0.355226	0.970024	-0.0439081	0.479929	0.88674	-0.173417	0.0960923
ILMN_1680955	AURKA	6790	0.935624	-0.096	0.687577	0.935277	-0.0965344	0.382733	0.762761	-0.390696	0.01623	1.00848	0.0121755	0.658843	0.811247	-0.301787	0.0265003
ILMN_1768396	AURKAIP1	54998	1.07848	0.109	0.383682	0.820305	-0.285768	0.19043	0.802057	-0.318224	0.01623	0.931467	-0.102424	0.791082	0.910746	-0.13488	0.195562
ILMN_2053650	AURKAPS1	NA	1.10573	0.145	0.383266	1.02056	0.0293632	0.698535	1.72192	0.784022	0.107347	1.1959	0.258092	0.525358	2.01775	1.01275	0.55569
ILMN_1684217	AURKB	9212	0.924663	-0.113	0.700863	0.930114	-0.104521	0.382733	0.796545	-0.328173	0.0644577	0.972266	-0.0405775	1	0.832643	-0.264229	0.195562
ILMN_1749081	AUTS2	26053	1.21083	0.276	0.075856	0.95436	-0.0673946	0.382733	0.775066	-0.367609	0.01623	1.01674	0.0239478	1	0.825725	-0.276266	0.01623
ILMN_1710216	AVEN	57099	0.955283	-0.066	0.75675	0.910439	-0.135365	1	0.662848	-0.59325	0.0265003	1.05103	0.0718081	0.929637	0.765207	-0.386077	0.01623
ILMN_1674265	AVIL	10677	1.03455	0.049	0.783201				1.74252	0.801177	0.19043	1.00173	0.00249036	0.943057
ILMN_1722292	AVL9	23080	1.26313	0.337	0.033459	0.698179	-0.518332	0.19043	0.720921	-0.472087	0.139087	1.15489	0.207755	0.929637	0.932276	-0.101171	0.711531
ILMN_1811443	AVP	551	0.964598	-0.052	0.778252
ILMN_1671731	AVPI1	60370	1.12039	0.164	0.36042	0.981487	-0.0269589	1	0.927004	-0.109353	0.711531	1.02758	0.0392468	0.723932	0.970535	-0.0431472	0.355226
ILMN_1698324	AVPR2	554				0.807465	-0.308529	0.382733	0.956306	-0.0644556	0.267257	0.882032	-0.181097	0.377225	1.04462	0.0629764	1
ILMN_1692967	AXIN1	8312	1.04391	0.062	0.746832	0.876709	-0.18983	0.382733	0.732073	-0.449941	0.267257	0.974387	-0.0374325	0.929637	0.813637	-0.297543	0.355226
ILMN_1724480	AXIN2	8313	1.01819	0.026	0.909079							0.669498	-0.578848	0.540291
ILMN_1701877	AXL	558	0.764188	-0.388	0.015295
ILMN_1703123	AXUD1	NA	1.54114	0.624	0.000352	0.952487	-0.0702291	0.382733	0.934063	-0.0984087	0.355226	1.01101	0.015803	0.377225	0.991458	-0.0123765	0.853307
ILMN_1754400	AYP1p1	NA				1.02756	0.0392294	1	0.796041	-0.329085	0.0419616	1.06922	0.0965544	0.250998	0.828309	-0.27176	0.267257
ILMN_1797154	AZGP1	563				0.771054	-0.375096	0.0808556	0.649423	-0.62277	0.01623	0.919523	-0.121042	0.426777	0.774471	-0.368716	0.0419616
ILMN_1746206	AZI1	NA	0.908778	-0.138	0.262434	0.7854	-0.3485	0.662521	0.535226	-0.90178	0.288844	0.993956	-0.00874591	0.859684	1.13288	0.179992	0.371093
ILMN_1733680	AZI2	64343	1.18591	0.246	0.079207	1.18784	0.248342	1	0.920022	-0.12026	0.459543	0.889178	-0.169456	0.216373	0.688697	-0.538058	0.0960923
ILMN_1656682	AZIN1	51582	0.858565	-0.22	0.13476	1.00084	0.00121454	1	1.18114	0.240182	0.267257	0.865881	-0.20776	0.111961	0.789646	-0.340723	0.139087
ILMN_1730867	AZU1	566	0.936272	-0.095	0.56519										0.482384	-1.05175	1
ILMN_2148459	B2M	567	0.598325	-0.741	0.003533	0.857264	-0.222189	0.662521	0.939237	-0.0904381	0.5791	0.898029	-0.155166	0.426777	0.955046	-0.0663584	0.139087
ILMN_1726840	B3GALNT1	8706	1.12194	0.166	0.25897	0.815881	-0.29357	0.382733	0.975569	-0.0356837	0.355226	0.820576	-0.28529	0.250998	0.791474	-0.337386	0.0265003
ILMN_1780188	B3GALNT2	148789	0.940826	-0.088	0.563796	0.951601	-0.0715715	1	0.917591	-0.124077	0.711531	0.805639	-0.311794	0.331387	0.776846	-0.3643	0.355226
ILMN_1659202	B3GALT1	8708	0.971307	-0.042	0.833696
ILMN_1709907	B3GALT2	8707	1.00139	0.002	0.993713
ILMN_1657096	B3GALT3	NA	0.936921	-0.094	0.550798	0.713075	-0.487874	0.77283	0.805754	-0.311589	0.867632	0.736258	-0.441717	0.229766	0.83195	-0.265432	0.245278
ILMN_1690682	B3GALT4	8705				1.07939	0.110216	0.19043	0.898455	-0.154481	0.139087	0.907416	-0.140163	0.859819	0.755309	-0.404861	0.0644577
ILMN_1739749	B3GALT6	126792				0.969835	-0.0441884	0.382733	0.82551	-0.276642	0.0644577	0.978738	-0.0310046	0.723932	0.833089	-0.263458	0.139087
ILMN_1764813	B3GALTL	NA	1.11729	0.16	0.240797	0.94932	-0.0750331	1	0.70181	-0.510848	0.494125	1.06036	0.0845585	1	0.783901	-0.351256	0.355226
ILMN_1794072	B3GAT1	27087	0.892547	-0.164	0.257145	0.761768	-0.392578	0.0808556	0.813166	-0.298378	0.195562	0.677044	-0.562679	0.0183978	0.722726	-0.468479	0.0524795
ILMN_2210581	B3GAT3	26229	0.997923	-0.003	0.990794	0.778018	-0.362125	0.382733	0.840788	-0.250187	0.711531	1.0013	0.00187166	0.596242	1.08208	0.113809	1
ILMN_3246214	B3GNT1	NA	0.694478	-0.526	0.000842	0.939846	-0.0895035	0.662521	0.71599	-0.481989	0.0644577	0.947393	-0.0779657	0.859819	0.721739	-0.470452	0.0265003
ILMN_1711102	B3GNT2	10678	1.06216	0.087	0.687195	1.04025	0.0569306	0.662521	1.15396	0.206595	0.5791	0.956268	-0.0645123	0.859819	1.0608	0.0851521	0.853307
ILMN_1800082	B3GNT3	10331	1.1065	0.146	0.27661	0.494101	-1.01712	0.19043	0.68288	-0.550296	0.0320887	0.957846	-0.0621348	0.651378	1.3238	0.404691	0.897279
ILMN_1771260	B3GNT4	79369	0.955283	-0.066	0.740054	0.71068	-0.492727	0.0808556	0.814353	-0.296274	0.0644577	0.811499	-0.301339	0.00619332	0.929879	-0.104886	0.195562
ILMN_1715384	B3GNT6	192134				0.813201	-0.298316	0.19043	0.779675	-0.359054	0.01623	0.819276	-0.287578	0.289315	0.7855	-0.348316	0.01623
ILMN_1680081	B3GN-T6	NA	1.03025	0.043	0.885521	1.15713	0.210552	0.662521	0.98446	-0.022596	0.918707	0.838063	-0.254869	0.809894	0.713005	-0.488017	0.267257
ILMN_1741389	B3GNT8	374907	0.937571	-0.093	0.590678	0.627034	-0.673385	0.386476	0.633718	-0.658088	0.376759	1.0299	0.0425107	0.749119	1.04088	0.0578084	0.867632
ILMN_1702817	B3GNTL1	146712	1.1321	0.179	0.210495
ILMN_1805725	B4GALNT1	2583	0.951318	-0.072	0.680845				1.05351	0.0752085	1	0.833009	-0.263597	0.662521
ILMN_1753271	B4GALNT3	283358	0.911301	-0.134	0.406044
ILMN_1796663	B4GALNT4	338707	1.04464	0.063	0.817404	0.892228	-0.164516	0.0808556	0.862907	-0.212724	0.0644577	0.909206	-0.137321	0.0773886	0.879327	-0.185529	0.139087
ILMN_1766221	B4GALT1	2683	0.733058	-0.448	0.003413	0.839044	-0.253182	0.0808556	0.884378	-0.177265	0.01623	0.965185	-0.0511223	0.596242	1.01734	0.0247948	1
ILMN_1753755	B4GALT2	8704	0.868742	-0.203	0.259225	0.747505	-0.419846	0.0808556	0.661149	-0.596953	0.0960923	0.910714	-0.13493	0.377225	0.805504	-0.312037	0.267257
ILMN_1692267	B4GALT3	8703	0.95	-0.074	0.699026	0.874388	-0.193654	0.0808556	1.0126	0.0180667	1	0.882806	-0.179832	0.289315	1.02235	0.0318881	0.459543
ILMN_1661500	B4GALT4	8702	0.802181	-0.318	0.013176	0.948177	-0.0767713	0.662521	0.839736	-0.251993	0.267257	1.05031	0.070818	0.658843	0.847899	-0.238036	0.195562
ILMN_1685824	B4GALT5	9334	1.07923	0.11	0.671793	0.939768	-0.0896237	0.382733	1.07346	0.102267	0.853307	0.911297	-0.134006	0.479929	1.04094	0.0578845	0.853307
ILMN_1663541	B4GALT7	11285				0.885607	-0.175261	0.662521	0.705074	-0.504153	0.0644577	1.01571	0.0224856	0.929637	0.808653	-0.306407	0.0419616
ILMN_3239284	B9D1	27077	0.879649	-0.185	0.169344	0.928238	-0.107433	0.662521	0.779793	-0.358837	0.0960923	0.878803	-0.186389	0.377225	0.738263	-0.437793	0.01623
ILMN_1806999	B9D2	80776				0.73689	-0.44048	0.662521	0.744673	-0.425321	0.853307	1.02476	0.035289	0.723932	1.03559	0.0504471	1
ILMN_1687751	BAALC	79870	0.902501	-0.148	0.525412	0.770462	-0.376204	0.382733	0.652168	-0.616684	0.261572	0.932181	-0.101318	0.862187	0.789057	-0.341798	0.819708
ILMN_2320349	BACE1	23621	0.872968	-0.196	0.209658	0.916651	-0.125556	0.662521	0.787488	-0.344671	0.139087	0.866567	-0.206616	0.250998	0.744461	-0.425731	0.0419616
ILMN_1669323	BACE2	25825	0.742262	-0.43	0.001092	0.720445	-0.473039	0.0808556	0.695595	-0.52368	0.0265003	0.915555	-0.127282	0.426777	0.726032	-0.461895	0.0265003
ILMN_1807181	BACH1	571	1.09278	0.128	0.359607	0.565176	-0.823227	0.0808556	0.743441	-0.42771	0.459543	0.656453	-0.607236	0.0933977	0.863508	-0.211719	0.853307
ILMN_1670695	BACH2	60468	1.24057	0.311	0.100346	0.739375	-0.435622	1	0.787828	-0.344048	0.453255	0.967428	-0.0477735	0.575174	1.03083	0.0438001	0.518605
ILMN_1738652	BAD	572	0.836826	-0.257	0.05125	0.831749	-0.265779	0.0808556	0.719015	-0.475907	0.01623	0.947385	-0.0779778	0.216373	0.760365	-0.395235	0.0960923
ILMN_1733970	BAG1	573				0.830905	-0.267245	0.662521	0.809543	-0.30482	0.5791	1.00991	0.0142238	0.723932	0.983944	-0.0233518	0.711531
ILMN_3244893	BAG2	9532				0.857075	-0.222507	0.382733	0.764087	-0.388191	0.711531	1.01206	0.0172934	1	0.902257	-0.148391	1
ILMN_1659766	BAG3	9531	0.967947	-0.047	0.829474	0.991898	-0.0117361	0.662521	0.853012	-0.229362	0.0960923	0.980785	-0.0279914	0.723932	0.843455	-0.245617	0.139087
ILMN_1727996	BAG4	9530	1.11961	0.163	0.457661	1.08937	0.123493	1	0.840859	-0.250064	0.267257	0.941389	-0.0871372	0.426777	0.726637	-0.460694	0.0644577
ILMN_1728514	BAG5	9529	1.32961	0.411	0.003938	0.811675	-0.301026	0.382733	0.938349	-0.0918034	0.853307	0.896425	-0.157745	0.216373	1.05001	0.0704013	1
ILMN_1768994	BAGE	574				0.959959	-0.0589548	0.382733	1.15009	0.201751	1	0.927408	-0.108724	1	1.11109	0.151982	0.765594
ILMN_2168766	BAGE2	85319
ILMN_3242544	BAHCC1	57597	0.962594	-0.055	0.756223
ILMN_1739256	BAHD1	22893	0.928517	-0.107	0.57255	1.19292	0.254502	0.0808556	0.927566	-0.108478	0.853307	0.840115	-0.251342	0.185326	0.653237	-0.614321	0.139087
ILMN_1729529	BAI1	NA	1.19416	0.256	0.144602	0.898457	-0.154478	0.77283	0.902659	-0.147748	0.816961	1.17309	0.230316	0.288844	1.17858	0.237046	1
ILMN_1773109	BAI2	NA				0.689143	-0.537124	0.540291	0.548932	-0.865301	0.245278	1.06162	0.0862664	0.846451	0.845625	-0.24191	0.558185
ILMN_1705922	BAIAP2	10458	1.13367	0.181	0.193732	0.763911	-0.388523	0.0808556	0.696535	-0.521732	0.01623	0.804078	-0.314592	0.289315	0.749929	-0.415174	0.355226
ILMN_1703593	BAIAP2L1	55971	0.824734	-0.278	0.202265	0.80022	-0.321532	0.19043	0.723292	-0.467351	0.139087	0.8403	-0.251024	0.250998	0.759518	-0.396843	0.139087
ILMN_1771652	BAIAP2L2	80115										0.871065	-0.199147	0.665006
ILMN_1805990	BAK1	578	1.20748	0.272	0.162504	0.543	-0.880977	0.0808556	0.765372	-0.385767	0.195562	0.813884	-0.297105	0.216373	1.14719	0.198105	1
ILMN_1691410	BAMBI	25805	1.42504	0.511	0.075881	1.0637	0.0890916	1	0.992096	-0.0114479	1	1.00486	0.0069911	1	0.937215	-0.0935484	0.853307
ILMN_2179837	BANF1	8815	1.24143	0.312	0.029893	0.751533	-0.412091	0.0808556	0.874855	-0.192884	0.0419616	0.893413	-0.1626	0.13332	0.943334	-0.0841597	0.5791
ILMN_1805823	BANF2	140836	0.939523	-0.09	0.647786
ILMN_1663631	BANP	54971	1.52309	0.607	0	0.697118	-0.520526	0.0808556	0.89578	-0.158784	0.459543	0.789326	-0.341306	0.0933977	1.01427	0.0204361	0.5791
ILMN_1768363	BAP1	8314	1.06363	0.089	0.529101	0.732892	-0.448327	0.19043	0.892648	-0.163836	0.139087	1.00912	0.0130997	0.791082	1.22909	0.297591	0.355226
ILMN_1782004	BAPX1	NA				1.15654	0.209819	0.382733	1.14794	0.199047	0.267257	0.93743	-0.0932171	0.658843	0.930457	-0.103989	1
ILMN_2074258	BARD1	580	1.05044	0.071	0.811916	1.14138	0.190783	1	0.858454	-0.220187	0.355226	0.991132	-0.0128511	0.596242	0.745448	-0.423821	0.267257
ILMN_1706493	BARHL2	343472	1.10114	0.139	0.469973
ILMN_1772312	BARX1	56033	1.06069	0.085	0.642293
ILMN_1651826	BASP1	10409	1.22434	0.292	0.013547							0.879366	-0.185464	0.148837	0.887389	-0.172361	0.723674
ILMN_1686626	BAT1	NA	0.992404	-0.011	0.968257	0.891194	-0.166188	0.382733	1.02675	0.038084	0.711531	0.795331	-0.330372	0.289315	0.916305	-0.1261	1
ILMN_2408179	BAT2	NA	1.26225	0.336	0.035354	0.714093	-0.485817	0.0808556	0.663669	-0.591464	0.01623	1.0174	0.0248921	0.596242	0.907573	-0.139915	0.355226
ILMN_1743137	BAT2D1	NA	1.36509	0.449	0.005539	1.11884	0.162007	1	0.773604	-0.370333	0.5791	0.868407	-0.203557	0.289315	0.600445	-0.735897	0.0265003
ILMN_3247802	BAT2L	NA	1.23285	0.302	0.03593	0.910709	-0.134939	0.382733	1.04106	0.0580506	0.853307	1.02174	0.0310299	0.791082	1.16798	0.224019	0.711531
ILMN_2390416	BAT3	NA	0.886382	-0.174	0.307616	0.740239	-0.433936	0.19043	0.890131	-0.167911	0.853307	0.902508	-0.147988	0.479929	1.12992	0.176218	0.195562
ILMN_1742782	BAT4	NA	1.19914	0.262	0.033923	0.774675	-0.368337	0.0808556	1.06507	0.0909467	0.853307	0.866125	-0.207352	0.723932	1.1908	0.251931	0.0960923
ILMN_2152402	BAT5	NA	0.849685	-0.235	0.089427	0.994718	-0.0076406	0.662521	0.815089	-0.29497	0.0644577	1.04988	0.0702233	0.596242	0.86029	-0.217106	0.0419616
ILMN_1668822	BATF	10538				0.621448	-0.686295	0.386476	0.951331	-0.0719811	0.906186	0.848791	-0.236519	0.658843	1.29935	0.377795	0.267257
ILMN_1690241	BATF2	116071	0.938221	-0.092	0.906819
ILMN_1763207	BATF3	55509	0.938221	-0.092	0.801256
ILMN_1683300	BAX	581	1.25527	0.328	0.025711	0.631777	-0.662512	0.19043	0.661378	-0.596454	0.150962	0.76441	-0.387582	0.0773886	0.898149	-0.154973	0.267257
ILMN_1658327	BAZ1A	11177	1.21672	0.283	0.106651	0.766152	-0.384297	0.19043	1.29904	0.377443	0.459543	0.884765	-0.176634	0.185326	1.09593	0.132156	0.711531
ILMN_1680831	BAZ1B	9031	1.22603	0.294	0.008416	0.835075	-0.260022	0.0808556	0.839108	-0.253071	0.355226	0.854543	-0.226775	0.250998	0.85867	-0.219824	0.459543
ILMN_1676318	BAZ2A	11176	0.99103	-0.013	0.953
ILMN_1720850	BAZ2B	29994	1.28521	0.362	0.004337	0.957015	-0.063387	1	0.836944	-0.256797	0.355226	0.798332	-0.324939	0.0104443	0.69817	-0.518349	0.01623
ILMN_1729645	BBC3	27113	1.10496	0.144	0.330243	0.838941	-0.253359	0.382733	1.0272	0.0387147	0.5791	1.04625	0.0652285	0.658843	1.28103	0.357302	0.139087
ILMN_1800590	BBS1	582	0.799406	-0.323	0.011599	0.909669	-0.136587	0.382733	0.904191	-0.145301	0.355226	0.90957	-0.136744	0.216373	0.904092	-0.145458	0.459543
ILMN_1741985	BBS10	79738	1.35004	0.433	0.000664	1.9735	0.980759	0.19043	1.47957	0.565173	0.5791	0.883031	-0.179463	0.658843	0.662022	-0.595049	0.139087
ILMN_2166972	BBS12	166379							1.30791	0.387263	0.148915	0.740856	-0.432735	0.215925
ILMN_2230035	BBS2	583	0.82302	-0.281	0.042759	0.858952	-0.219351	0.0808556	0.770841	-0.375495	0.01623	0.905781	-0.142766	0.216373	0.858235	-0.220556	0.139087
ILMN_1762466	BBS4	585	0.867539	-0.205	0.23768	1.08318	0.115277	0.662521	1.15986	0.213952	1	0.979774	-0.0294796	0.596242	1.04913	0.0691954	0.711531
ILMN_1663592	BBS5	129880				1.14519	0.195584	0.540291	1.02552	0.0363603	0.561276	0.769459	-0.378084	0.241567	0.689056	-0.537308	1
ILMN_2257833	BBS7	55212	1.11497	0.157	0.246977	1.08017	0.111262	0.382733	0.718741	-0.476456	0.184573	0.801219	-0.319731	0.0340692	0.781458	-0.355759	0.0644577
ILMN_2352159	BBS9	27241	1.13682	0.185	0.331324	1.18591	0.245997	0.382733	0.911725	-0.13333	0.195562	0.914023	-0.129697	0.185326	0.702698	-0.509023	0.0419616
ILMN_1745415	BBX	56987	1.17691	0.235	0.081157	0.676253	-0.564365	0.0808556	0.771653	-0.373976	0.355226	0.825766	-0.276195	0.157704	0.942258	-0.0858055	0.711531
ILMN_1790455	BCAM	4059				0.78582	-0.34773	0.371093	0.729173	-0.455668	0.233038	0.980414	-0.0285368	0.648077	0.909739	-0.136475	0.802587
ILMN_1680300	BCAN	63827	1.12117	0.165	0.242476	0.576041	-0.795756	0.19043	0.740487	-0.433453	0.0644577	0.848702	-0.23667	0.479929	1.09099	0.125633	0.711531
ILMN_2342084	BCAP29	55973	0.82188	-0.283	0.043237	1.30044	0.379003	0.662521	0.823568	-0.280041	0.355226	0.875146	-0.192404	0.289315	0.799485	-0.322857	0.139087
ILMN_1812403	BCAP31	10134	1.01255	0.018	0.923036	0.92176	-0.117538	0.0808556	0.762061	-0.392021	0.0419616	1.03671	0.0520175	0.859819	0.857099	-0.222466	0.0960923
ILMN_1672596	BCAR1	9564	0.925304	-0.112	0.643804	0.679773	-0.556874	0.662521	0.783717	-0.351596	0.459543	1.00072	0.00103643	0.658843	1.15374	0.206315	0.5791
ILMN_1763638	BCAR3	8412	1.1065	0.146	0.371171	0.900039	-0.151941	0.382733	0.782988	-0.352937	0.0419616	0.980498	-0.0284132	0.479929	0.852984	-0.229409	0.0265003
ILMN_3191746	BCAR4	400500	0.91764	-0.124	0.463261	1.17053	0.227159	0.662521	0.982753	-0.0250992	0.459543	1.0541	0.0760093	0.723932	0.885001	-0.176249	0.459543
ILMN_1733042	BCAS1	8537				0.846516	-0.24039	0.662521	0.710951	-0.492178	0.125786	0.822987	-0.281058	0.325271	0.712816	-0.488397	0.0644577
ILMN_1751760	BCAS2	10286	0.97468	-0.037	0.854704	1.20609	0.270342	0.662521	1.02019	0.0288331	0.711531	1.10555	0.144766	0.331387	1.13281	0.179899	0.5791
ILMN_2325506	BCAS4	55653	0.76313	-0.39	0.007394	0.891557	-0.165601	0.662521	0.769063	-0.378825	0.0960923	0.868469	-0.203454	0.157704	0.815901	-0.293534	0.0265003
ILMN_1766169	BCAT1	586	0.741748	-0.431	0.014144
ILMN_1695110	BCAT2	587	0.877213	-0.189	0.330243	0.877416	-0.188667	0.19043	0.768894	-0.379144	0.0960923	0.912177	-0.132614	0.723932	0.799356	-0.32309	0.139087
ILMN_1786433	BCCIP	56647	1.84933	0.887	0	0.90063	-0.150994	0.19043	0.82949	-0.269703	0.01623	0.915033	-0.128105	0.157704	0.825686	-0.276335	0.267257
ILMN_1796113	BCDIN3D	144233	1.337	0.419	0.002731	0.983141	-0.0245302	1	1.06631	0.0926302	1	0.981164	-0.0274336	0.929637	1.06417	0.0897268	0.711531
ILMN_2176592	BCHE	590	0.7884	-0.343	0.057595	0.497377	-1.00759	0.540291	0.488217	-1.03441	0.2113	0.734869	-0.44444	0.066753	0.721335	-0.471258	0.245278
ILMN_1735979	BCKDHA	593	1.10267	0.141	0.484425	0.808438	-0.30679	0.19043	0.806163	-0.310857	0.0960923	1.03873	0.0548211	0.859819	1.03581	0.0507539	1
ILMN_1764166	BCKDHB	594	0.84792	-0.238	0.052996	0.674083	-0.569001	0.0808556	0.82194	-0.282896	0.0419616	0.654378	-0.611803	0.0773886	0.511085	-0.968364	0.01623
ILMN_1693394	BCKDK	10295	0.476649	-1.069	0	0.81681	-0.291928	0.662521	0.693194	-0.528669	0.139087	1.04113	0.05815	0.723932	0.883565	-0.178591	0.0644577
ILMN_1716446	BCL10	8915	1.08749	0.121	0.495657	0.711565	-0.490932	0.245278	0.603882	-0.72766	0.066753	0.898032	-0.155162	0.596242	1.22113	0.288214	0.355226
ILMN_2342271	BCL11A	53335	1.12818	0.174	0.225465	1.37812	0.462705	1
ILMN_2246956	BCL2	596	1.09505	0.131	0.409402	0.882636	-0.18011	1	1.00336	0.00484058	0.77283	0.858966	-0.219328	0.15558	0.646096	-0.630179	0.371093
ILMN_1769229	BCL2A1	597	1.02883	0.041	0.840613	1.11203	0.1532	0.382733	0.946276	-0.0796677	1	0.654243	-0.612101	0.0342578	0.556723	-0.844969	0.0682475
ILMN_1654118	BCL2L1	598	1.25963	0.333	0.009371	0.777751	-0.362619	0.19043	0.627622	-0.672032	0.01623	0.864244	-0.210489	0.426777	0.721141	-0.471646	0.0419616
ILMN_2359627	BCL2L11	10018	1	0	0.999228				1.2085	0.273217	0.2113	1.26647	0.340818	0.241567
ILMN_2396982	BCL2L12	83596	1.22434	0.292	0.039634	0.95145	-0.0718005	0.382733	0.739534	-0.435312	0.0644577	0.864596	-0.209902	0.451913	0.73868	-0.436979	0.0524795
ILMN_2181445	BCL2L13	23786	1.00696	0.01	0.97431	0.752117	-0.41097	0.19043	0.822206	-0.282427	0.711531	0.940576	-0.0883835	0.596242	1.02823	0.0401593	1
ILMN_1664235	BCL2L14	79370	0.93174	-0.102	0.628165
ILMN_1746561	BCL2L2	599	0.768438	-0.38	0.000275	0.938167	-0.0920838	0.382733	0.818997	-0.288071	0.0644577	0.929562	-0.105377	0.723932	0.811485	-0.301364	0.195562
ILMN_1710514	BCL3	602	1.01466	0.021	0.923646	0.66956	-0.578716	0.19043	0.690002	-0.535328	0.0644577	1.06637	0.0927133	0.377225	1.09893	0.1361	1
ILMN_1737314	BCL6	604	1.53581	0.619	5e-06	0.953638	-0.0684855	0.662521	0.953693	-0.0684024	0.853307	0.876135	-0.190775	0.157704	0.876186	-0.190691	0.267257
ILMN_1651285	BCL6B	255877	1.20999	0.275	0.108669	0.908372	-0.138645	1	0.728091	-0.45781	0.0265003	0.890248	-0.167721	0.723932	0.713564	-0.486886	0.195562
ILMN_1706886	BCL7A	605	1.08222	0.114	0.466024	0.877639	-0.188301	0.0808556	1.01554	0.0222464	0.853307	0.929822	-0.104974	0.250998	1.07592	0.105573	0.853307
ILMN_2367275	BCL7B	9275	0.85441	-0.227	0.378822	0.937838	-0.0925893	0.382733	0.8806	-0.183442	0.5791	1.04498	0.0634748	0.929637	1.06198	0.0867584	0.5791
ILMN_2371147	BCL7C	9274	0.924023	-0.114	0.585043	0.929771	-0.105052	0.382733	0.730694	-0.452661	0.139087	0.940488	-0.0885189	0.536499	0.762537	-0.391121	0.355226
ILMN_1704452	BCL9	607	0.985549	-0.021	0.924344	0.821784	-0.283169	0.382733	0.888787	-0.170091	0.459543	0.806133	-0.31091	0.216373	0.871859	-0.197833	0.459543
ILMN_1743966	BCL9L	283149	1.06511	0.091	0.602397	0.669533	-0.578773	0.0808556	0.844224	-0.244302	0.0644577	0.781924	-0.3549	0.250998	0.98594	-0.0204287	0.853307
ILMN_2357272	BCLAF1	9774	1.27103	0.346	0.025463	0.585626	-0.771949	0.19043	1.08909	0.123123	0.711531	0.815645	-0.293986	0.0485396	0.747939	-0.419008	0.139087
ILMN_1773117	BCOR	54880	1.27368	0.349	0.00965	0.818304	-0.289292	0.662521	0.903275	-0.146763	0.5791	0.891838	-0.165147	0.331387	1.01449	0.0207495	0.698535
ILMN_1767015	BCORL1	63035	1.09885	0.136	0.401481	0.774243	-0.369141	0.0808556	0.715372	-0.483233	0.0419616	0.950881	-0.0726635	0.536499	0.878579	-0.186756	0.195562
ILMN_1669663	BCR	613	0.851454	-0.232	0.096512	0.553386	-0.853643	0.0808556	0.759742	-0.396418	0.0528075	0.823165	-0.280747	0.353111	0.920444	-0.119598	0.698535
ILMN_1738529	BCS1L	617	1.39959	0.485	0.000119	0.996002	-0.00578002	0.662521	1.08278	0.114742	1	0.848163	-0.237587	0.723932	0.922062	-0.117065	0.853307
ILMN_1678757	BCYRN1	618				0.817431	-0.290831	0.382733	0.830762	-0.267493	0.195562	0.952919	-0.0695753	0.658843	0.968459	-0.0462377	0.267257
ILMN_1683471	BDH1	622	1.074	0.103	0.572584	1.172	0.228974	0.0808556	0.7203	-0.47333	0.01623	0.907687	-0.139734	0.193931	0.730573	-0.4529	0.01623
ILMN_1734611	BDKRB1	623	1.09278	0.128	0.646565
ILMN_1684086	BDKRB2	624	0.823591	-0.28	0.055793
ILMN_1793988	BDNF	627	1.35379	0.437	0.000489	0.735722	-0.442768	1	0.802489	-0.317447	1
ILMN_3249533	BDNFOS	NA	1.00696	0.01	0.963551
ILMN_1744822	BECN1	8678	1.08147	0.113	0.716288	0.973411	-0.0388792	0.662521	0.95672	-0.0638316	0.853307	1.08527	0.118055	0.791082	1.06666	0.0931027	0.355226
ILMN_1668924	BEGAIN	57596	0.980779	-0.028	0.879704	1.29656	0.374686	0.662521	1.41779	0.503649	0.711531	1.22092	0.287972	0.331387	1.33509	0.416935	0.195562
ILMN_2375032	BEND3	57673	1.23029	0.299	0.022187	1.31199	0.391753	0.77283	0.952856	-0.0696693	0.711531	0.853609	-0.228352	0.377225	0.619951	-0.689774	0.194851
ILMN_1796574	BEND4	389206	0.895646	-0.159	0.25502				0.690362	-0.534574	0.371093
ILMN_3237448	BEND5	79656	0.911301	-0.134	0.331809
ILMN_1706969	BEND6	221336	1.07252	0.101	0.608557
ILMN_3178043	BEND7	222389	1.26225	0.336	0.004111	0.579428	-0.787299	0.382733	1.11548	0.157663	0.540291	0.735121	-0.443947	0.245278	0.799811	-0.322269	0.540291
ILMN_1718982	BEST1	7439	1.01466	0.021	0.918033							0.888243	-0.170974	0.575174
ILMN_1684042	BET1	10282	1.16312	0.218	0.188256	1.06279	0.0878573	0.662521	1.15075	0.202574	0.711531	0.885704	-0.175103	0.426777	0.959007	-0.0603862	0.5791
ILMN_2060652	BET1L	51272	1.15269	0.205	0.207467	1.05344	0.0751016	0.382733	0.965212	-0.0510829	0.355226	0.92269	-0.116082	0.289315	0.845416	-0.242267	0.0960923
ILMN_2234697	BEX1	55859	1.70764	0.772	0	0.863805	-0.211223	0.382733	0.77532	-0.367136	0.0960923	1.09159	0.126433	0.658843	0.979774	-0.0294794	0.459543
ILMN_2181892	BEX2	84707	1.00905	0.013	0.961292	0.950149	-0.0737742	0.382733	1.33882	0.420965	0.711531	0.781599	-0.3555	0.929637	1.10132	0.13924	0.711531
ILMN_2351638	BEX4	56271	0.909408	-0.137	0.329422	0.899641	-0.152579	1	1.9253	0.945083	0.125786	0.927039	-0.109298	0.713191	1.98393	0.988364	0.184573
ILMN_1806473	BEX5	340542				1.12741	0.17301	0.382733	0.843875	-0.244898	1	0.914143	-0.129508	0.143672	0.684245	-0.547416	0.233038
ILMN_1804798	BEXL1	NA				1.29707	0.375252	0.662521	1.80165	0.849317	0.355226	0.925835	-0.111172	0.723932	1.286	0.362893	0.267257
ILMN_1814808	BFAR	51283	1.15509	0.208	0.166259	0.858541	-0.220041	0.0808556	0.742123	-0.43027	0.0644577	0.985127	-0.0216186	0.331387	0.851543	-0.231848	0.139087
ILMN_1712608	BFSP1	631				1.17494	0.232592	0.19043	0.692526	-0.530061	0.0644577	0.987715	-0.0178328	0.479929	0.582171	-0.780486	0.0419616
ILMN_1690217	BFSP2	8419				0.782304	-0.354199	1	0.645567	-0.631361	0.0644577	0.986395	-0.0197632	0.859819	0.813985	-0.296925	0.267257
ILMN_1755818	BGLAP	632	1.00835	0.012	0.959929	1.01272	0.0182303	1	1.02538	0.0361554	1	0.91677	-0.125368	0.377225	0.928232	-0.107443	0.853307
ILMN_2206746	BGN	633	0.523768	-0.933	0.002432	0.764718	-0.387001	0.0808556	0.898524	-0.154372	0.459543	0.637565	-0.649356	0.0933977	0.749122	-0.416727	0.139087
ILMN_1768534	BHLHB2	NA	2.0648	1.046	0	1.06634	0.0926611	1	0.911177	-0.134196	0.267257	0.98564	-0.0208668	0.596242	0.842224	-0.247724	0.0265003
ILMN_1708131	BHLHB9	80823	0.976032	-0.035	0.874909	1.10104	0.138867	0.662521	0.922534	-0.116325	0.711531	0.85857	-0.219993	0.723932	0.719375	-0.475185	0.195562
ILMN_1699585	BHLHE22	27319	0.968618	-0.046	0.856531
ILMN_1692973	BICD1	636	1.04536	0.064	0.705398
ILMN_2380418	BICD2	23299	1.26576	0.34	0.01223	0.830214	-0.268445	0.382733	0.683163	-0.549698	0.0960923	1.08128	0.112738	0.859819	0.889758	-0.168515	0.711531
ILMN_2259495	BID	637	1.09278	0.128	0.455717	0.828954	-0.270636	0.662521	0.779444	-0.359482	0.195562	0.708736	-0.496679	0.0240277	0.71222	-0.489605	0.0960923
ILMN_1674160	BIN1	274	0.961928	-0.056	0.746832	0.74377	-0.427071	0.0808556	0.620433	-0.688651	0.0265003	0.97991	-0.0292783	0.658843	0.704435	-0.505461	0.0320887
ILMN_1708485	BIN3	55909	1.03598	0.051	0.773027	0.901494	-0.14961	0.371093	1.13185	0.178679	0.386476	0.720645	-0.472639	0.245278	0.904786	-0.144351	0.540291
ILMN_1768194	BIRC2	329	1.20832	0.273	0.118501	0.841338	-0.249243	0.662521	0.934611	-0.0975628	0.267257	0.778544	-0.36115	0.0636898	0.835269	-0.259687	0.0644577
ILMN_1776181	BIRC3	330				1.08564	0.118545	0.382733	2.16859	1.11676	0.139087	0.905729	-0.142849	0.723932	1.74038	0.7994	0.0960923
ILMN_1803124	BIRC5	332	1.13761	0.186	0.250511	0.829174	-0.270254	0.19043	0.660598	-0.598155	0.0265003	0.958279	-0.0614831	0.596242	0.763455	-0.389384	0.0419616
ILMN_1801605	BIRC6	57448	0.944092	-0.083	0.635061	0.898481	-0.15444	1	0.758672	-0.398451	0.0960923	0.934876	-0.0971532	0.426777	0.789404	-0.341164	0.0960923
ILMN_2214098	BIVM	54841	0.984866	-0.022	0.89424	0.966448	-0.0492358	1	0.807637	-0.308221	0.0960923	0.975899	-0.0351965	0.331387	0.721754	-0.470421	0.0644577
ILMN_1675612	BLCAP	10904	0.885154	-0.176	0.278927	0.787545	-0.344565	0.19043	0.742269	-0.429987	0.0265003	0.973518	-0.0387198	0.479929	0.91755	-0.124141	0.267257
ILMN_1807331	BLID	414899	0.971981	-0.041	0.829196							1.18745	0.247861	1
ILMN_1709484	BLM	641	1.08298	0.115	0.480757	0.888343	-0.170812	0.662521	0.67348	-0.570292	0.459543	1.08859	0.122462	1	0.825294	-0.277019	0.195562
ILMN_1721921	BLMH	642	0.895646	-0.159	0.367772	1.08849	0.122332	1	0.912017	-0.132867	0.711531	1.03852	0.0545313	0.377225	0.870148	-0.200668	0.195562
ILMN_2142935	BLNK	29760
ILMN_2157510	BLOC1S1	2647	0.993093	-0.01	0.976704	0.838109	-0.254791	0.382733	0.730214	-0.453609	0.0960923	0.854999	-0.226005	0.0272754	0.74493	-0.424823	0.0644577
ILMN_1679782	BLOC1S2	282991	1.02527	0.036	0.9069	0.980596	-0.0282693	0.662521	1.09899	0.136173	0.459543	0.846969	-0.239619	0.386476	1.20522	0.269302	0.195562
ILMN_1681242	BLOC1S3	388552	0.843816	-0.245	0.113525
ILMN_1691436	BLVRA	644	0.93174	-0.102	0.633857	0.917805	-0.12374	0.662521	0.723679	-0.466579	0.0644577	1.03383	0.0479935	0.723932	0.81516	-0.294845	0.01623
ILMN_1797793	BLVRB	645	0.891311	-0.166	0.394829	0.917958	-0.123499	0.0808556	0.800943	-0.320229	0.01623	0.961048	-0.0573194	1	0.83854	-0.254049	0.0644577
ILMN_2106658	BLZF1	8548				0.797372	-0.326676	0.382733	0.70024	-0.514078	0.0960923	0.814537	-0.295949	0.289315	0.905519	-0.143183	0.5791
ILMN_1787794	BMF	90427	0.885154	-0.176	0.229933	1.2852	0.361993	1	1.48699	0.572394	0.125786	0.763706	-0.388912	0.0485396	0.883615	-0.178511	0.853307
ILMN_1700915	BMI1	648	1.22095	0.288	0.038134	1.31336	0.393265	0.662521	1.48311	0.56863	0.267257	0.792485	-0.335544	0.791082	0.894914	-0.16018	0.853307
ILMN_1800412	BMP1	649	0.759962	-0.396	0.003404	0.959622	-0.0594626	1	1.69213	0.758837	0.288844	0.620768	-0.687875	0.24716	0.780788	-0.356997	0.195562
ILMN_1722718	BMP2	650	1.97247	0.98	7e-06
ILMN_1811148	BMP2K	55589	0.940174	-0.089	0.559631	0.936304	-0.0949506	0.540291	0.866227	-0.207183	0.77283	0.899732	-0.152433	0.662521	1.16602	0.221594	0.540291
ILMN_1682661	BMP3	651	1.05044	0.071	0.697841
ILMN_1740900	BMP4	652	0.618566	-0.693	1.6e-05	0.850647	-0.233368	0.0808556	0.929782	-0.105035	0.853307	0.937512	-0.0930909	0.426777	1.02473	0.0352421	0.711531
ILMN_1660552	BMP5	653				1.03612	0.0511857	1	1.13552	0.18335	0.558185	0.820099	-0.28613	0.120691	0.898776	-0.153966	0.518605
ILMN_1747650	BMP6	654	1.34537	0.428	0.001065
ILMN_2123415	BMP8B	656				1.05503	0.0772817	0.662521	0.96233	-0.0553964	0.5791	0.95658	-0.0640426	0.723932	0.872532	-0.196721	0.139087
ILMN_3307916	BMPER	168667	1.12662	0.172	0.345364
ILMN_1706957	BMPR1A	657	0.838568	-0.254	0.041785	1.17596	0.233833	0.19043	0.857419	-0.221927	0.5791	0.92271	-0.11605	0.216373	0.672772	-0.571811	0.01623
ILMN_1801658	BMPR1B	658	1.09733	0.134	0.456531
ILMN_2070896	BMPR2	659	0.951978	-0.071	0.77939	1.46211	0.548054	0.662521	0.820412	-0.285579	0.0644577	0.782043	-0.354679	0.0773886	0.497487	-1.00727	0.0419616
ILMN_1772713	BMS1	9790	1.18838	0.249	0.041897	0.928931	-0.106357	0.382733	0.877228	-0.188976	0.267257	0.931556	-0.102286	0.157704	0.879707	-0.184906	0.267257
ILMN_3238183	BMS1P5	NA				0.899824	-0.152285	0.662521	0.842037	-0.248045	0.459543	0.986424	-0.0197203	0.536499	0.923075	-0.115481	0.355226
ILMN_1796138	BMX	660	0.976032	-0.035	0.876852
ILMN_1692748	BNC1	646	0.935624	-0.096	0.603834
ILMN_1656373	BNC2	54796	1.27544	0.351	0.002136
ILMN_2318733	BNIP1	662	1.27987	0.356	0.004133	0.924398	-0.113414	0.382733	0.804314	-0.31417	0.0644577	0.939807	-0.0895632	0.289315	0.765445	-0.38563	0.0960923
ILMN_1770803	BNIP2	663	1.14393	0.194	0.155843	1.02041	0.0291534	1	1.12884	0.174842	0.711531	0.891113	-0.16632	0.723932	0.985801	-0.0206318	1
ILMN_1724658	BNIP3	664	0.915099	-0.128	0.502779	0.926889	-0.109531	0.662521	1.09834	0.13533	1	0.84933	-0.235602	0.331387	1.00644	0.00925902	0.853307
ILMN_1718961	BNIP3L	665	1.08523	0.118	0.625151	0.893163	-0.163005	0.662521	0.83153	-0.26616	0.5791	0.830369	-0.268175	0.157704	0.743225	-0.428128	0.139087
ILMN_1711170	BNIPL	149428	0.914465	-0.129	0.485526	0.741554	-0.431376	0.0808556	0.845185	-0.242661	0.195562	0.747673	-0.41952	0.250998	0.734173	-0.445807	0.0960923
ILMN_1689172	BOAT	NA	0.938872	-0.091	0.651418	0.697998	-0.518705	0.540291	0.905541	-0.143147	0.464214	0.70729	-0.499627	0.193876	0.917596	-0.124069	1
ILMN_1730032	BOK	666	0.825305	-0.277	0.076188	0.951629	-0.0715288	0.382733	0.859256	-0.218839	0.195562	0.89922	-0.153253	0.111961	0.811935	-0.300564	0.0419616
ILMN_1793966	BOLA1	51027	1.14155	0.191	0.109762	0.874895	-0.192818	0.382733	0.985212	-0.0214945	0.459543	1.03334	0.0473108	0.929637	1.16363	0.218634	0.711531
ILMN_1659343	BOLA2	552900	1.19334	0.255	0.050853	0.654167	-0.61227	0.0808556	0.755789	-0.403945	0.0960923	0.974596	-0.0371235	0.479929	0.922	-0.117161	0.267257
ILMN_3249676	BOLA2B	654483	1.12272	0.167	0.292281	1.17062	0.227268	1	0.630391	-0.665682	0.0402387	1.09325	0.128624	0.898327	0.588729	-0.764325	0.17146
ILMN_2258488	BOLA3	388962	1.14155	0.191	0.292388	0.896404	-0.157779	0.19043	0.885863	-0.174844	0.01623	0.944831	-0.0818724	0.426777	0.848754	-0.236583	0.0644577
ILMN_1670746	BOLL	66037	1.03025	0.043	0.80697							1.05313	0.0746881	0.540291
ILMN_1715583	BOP1	23246				0.997496	-0.00361652	0.662521	0.815531	-0.294189	0.0265003	1.01272	0.0182376	0.791082	0.827978	-0.272335	0.0960923
ILMN_2147920	BP75	NA	1.21167	0.277	0.063917	0.730956	-0.452143	0.19043	0.674179	-0.568796	0.0960923	0.935392	-0.0963575	0.216373	0.862735	-0.21301	0.01623
ILMN_2352921	BPGM	669	0.967947	-0.047	0.858099	0.789284	-0.341383	0.662521	0.838394	-0.2543	0.5791	0.902937	-0.147303	0.658843	0.959118	-0.0602196	1
ILMN_1657746	BPHL	670	0.937571	-0.093	0.556469	0.810077	-0.303868	0.19043	0.857265	-0.222187	0.195562	0.806326	-0.310565	0.479929	0.853295	-0.228884	0.195562
ILMN_1766736	BPI	671							1.01656	0.0236934	0.698535
ILMN_1712718	BPNT1	10380	1.11188	0.153	0.413058	1.17596	0.233842	0.382733	1.1867	0.246954	0.853307	0.892949	-0.16335	0.536499	0.901102	-0.150238	0.355226
ILMN_1688381	BPTF	2186	1.24143	0.312	0.004228				1.07902	0.109728	0.77283	0.674634	-0.567823	0.245278
ILMN_2217056	BPY2B	442867										1.19486	0.256846	0.148915	0.978596	-0.0312145	0.698535
ILMN_1652472	BRAF	673				0.828447	-0.271519	1	0.977999	-0.0320944	0.371093	0.855851	-0.224568	0.662521	1.01035	0.0148562	1
ILMN_1738027	BRCA1	672	0.873573	-0.195	0.24468	0.897877	-0.155411	0.0808556	0.852802	-0.229716	0.139087	0.881772	-0.181522	0.216373	0.915482	-0.127397	0.195562
ILMN_1697546	BRCC3	79184				1.10698	0.146627	0.662521	0.94269	-0.0851443	0.459543	0.905813	-0.142714	0.185326	0.771381	-0.374485	0.0265003
ILMN_1730019	BRD1	23774	1.12584	0.171	0.262011	0.960403	-0.0582881	0.662521	1.26237	0.33614	0.355226	0.908192	-0.138932	0.426777	1.19375	0.255496	0.711531
ILMN_1758918	BRD2	6046	1.39959	0.485	0.002014	1.00884	0.012704	0.662521	1.46648	0.552361	0.355226	0.963959	-0.052957	1	1.40124	0.4867	0.267257
ILMN_1785635	BRD3	8019	1.39474	0.48	0.000314	0.79873	-0.32422	0.382733	0.968656	-0.0459432	0.711531	0.931777	-0.101943	0.377225	1.13001	0.176334	1
ILMN_1771061	BRD4	23476	1.21588	0.282	0.046322				0.755265	-0.404946	0.540291	0.950366	-0.0734453	0.723674
ILMN_2082810	BRD7	29117	1.09354	0.129	0.294278	1.08994	0.124251	1	0.885126	-0.176045	0.139087	0.985385	-0.0212412	0.596242	0.890932	-0.166613	0.139087
ILMN_3262031	BRD7P2	647076	0.92723	-0.109	0.424499	1.19432	0.256192	0.382733	1.605	0.682572	0.17146	0.723964	-0.466011	0.0966976	0.888856	-0.169978	0.355226
ILMN_3245301	BRD7P3	23629										0.718912	-0.476112	0.0813611
ILMN_1701711	BRD8	10902	1.23371	0.303	0.013063	0.79514	-0.330719	0.19043	0.859811	-0.217909	0.139087	0.920465	-0.119565	0.377225	0.982009	-0.0261912	0.459543
ILMN_1651405	BRD9	65980	0.691595	-0.532	1e-06	0.813968	-0.296957	0.662521	0.822462	-0.281978	0.5791	0.905951	-0.142495	0.377225	0.915406	-0.127517	0.5791
ILMN_1778684	BRE	NA	0.901875	-0.149	0.46075	0.88067	-0.183327	0.382733	0.817231	-0.291183	0.01623	0.791504	-0.337331	0.0933977	0.650276	-0.620876	0.01623
ILMN_3244769	BREA2	286076
ILMN_1703686	BRF1	2972	1.06437	0.09	0.555333	0.663051	-0.592808	0.662521	0.596199	-0.746134	0.267257	0.927464	-0.108637	0.479929	0.833952	-0.261963	0.267257
ILMN_1665554	BRF2	55290	1.17365	0.231	0.07534	1.00154	0.00221733	1	1.01078	0.0154726	0.711531	1.03983	0.0563476	0.791082	1.04943	0.0696028	0.711531
ILMN_1781580	BRI3	25798	1.07103	0.099	0.649819	0.781913	-0.354921	0.0808556	1.0217	0.0309767	1	0.943434	-0.0840062	0.723932	1.23276	0.301891	0.355226
ILMN_1797693	BRI3BP	140707	1.06142	0.086	0.667305	0.858144	-0.220708	0.0808556	0.7046	-0.505124	0.01623	0.772331	-0.37271	0.112351	0.781052	-0.35651	0.0960923
ILMN_3253304	BRI3P1	730010				0.863275	-0.212108	0.382733	1.04193	0.059264	0.711531	0.944193	-0.0828462	1	1.1396	0.188526	0.5791
ILMN_1760757	BRIP1	83990				0.680199	-0.555971	0.77283	0.721176	-0.471577	0.906186	0.871295	-0.198766	0.250998	0.923784	-0.114372	0.459543
ILMN_2155172	BRIX1	55299	1.56049	0.642	2.3e-05	0.931582	-0.102245	0.382733	0.979741	-0.0295272	0.853307	1.08769	0.121266	0.791082	1.11068	0.151442	0.459543
ILMN_2398432	BRMS1	25855	1.21757	0.284	0.010738	0.855612	-0.224971	0.382733	0.872369	-0.19699	0.711531	0.987283	-0.0184647	0.929637	1.1634	0.218341	0.267257
ILMN_1775943	BRMS1L	84312	1.12662	0.172	0.216718	1.08693	0.120256	0.698535	0.719275	-0.475385	0.243345	0.893564	-0.162356	0.173485	0.591316	-0.757998	0.066753
ILMN_1727813	BRP44	NA	0.740207	-0.434	0.077821	0.975698	-0.0354933	0.382733	0.85192	-0.23121	0.0644577	1.01291	0.0185065	0.791082	0.884411	-0.177211	0.459543
ILMN_2226324	BRP44L	NA	0.730522	-0.453	0.007662	0.864353	-0.210307	0.19043	0.663461	-0.591916	0.01623	0.961801	-0.0561901	0.536499	0.722053	-0.469824	0.01623
ILMN_2365549	BRPF1	7862	1.19416	0.256	0.005907	0.979461	-0.0299397	0.662521	1.2543	0.326882	0.355226	0.909181	-0.13736	0.658843	1.262	0.335713	0.267257
ILMN_1658800	BRPF3	27154	1.06216	0.087	0.579005	0.873275	-0.195493	1	0.848083	-0.237723	0.5791	0.964266	-0.052497	0.250998	0.936449	-0.0947276	0.355226
ILMN_2185845	BRSK1	84446	1.04899	0.069	0.70536	0.643278	-0.636487	0.0808556	0.887062	-0.172892	0.267257	0.837192	-0.256369	0.13332	1.15447	0.207225	0.195562
ILMN_1708496	BRSK2	9024	1.01466	0.021	0.941868	0.972666	-0.0399835	1	0.995612	-0.00634425	1	0.707358	-0.499488	0.371093	0.724045	-0.465848	1
ILMN_1660400	BRUNOL4	NA	1.05555	0.078	0.677811
ILMN_1656045	BRUNOL6	NA	1.02243	0.032	0.889384
ILMN_2296011	BRWD1	54014	0.926588	-0.11	0.455694	0.772545	-0.37231	0.382733	0.7279	-0.458188	0.139087	0.833216	-0.263238	0.216373	0.689582	-0.536206	0.0419616
ILMN_2086222	BRWD2	NA	0.952638	-0.07	0.708779	0.928347	-0.107264	0.662521	0.941617	-0.086787	1	0.875755	-0.191401	0.289315	0.888273	-0.170925	0.711531
ILMN_1757794	BRWD3	254065										0.73043	-0.453182	0.245278
ILMN_1774596	BSCL2	26580	0.767373	-0.382	0.000623	1.00449	0.00646683	1	0.836595	-0.257399	0.267257	1.01958	0.0279681	0.791082	0.849156	-0.235898	0.0960923
ILMN_1734483	BSDC1	55108	1.11806	0.161	0.206429	1.01846	0.0263893	1	0.921402	-0.118097	0.5791	0.975036	-0.0364729	0.658843	0.882116	-0.180959	0.267257
ILMN_1778374	BSG	682	0.932387	-0.101	0.704306	0.724617	-0.464709	0.0808556	0.80671	-0.309878	0.139087	0.966392	-0.0493188	0.377225	1.07588	0.105512	0.459543
ILMN_1726420	BSND	7809	1.12428	0.169	0.198338
ILMN_3242325	BSPH1	100131137	0.97942	-0.03	0.885027	1.19235	0.253807	0.540291	0.90701	-0.140809	1	0.998242	-0.00253868	0.713303	0.759354	-0.397155	0.487453
ILMN_3247560	BSPRY	54836				0.876135	-0.190775	0.19043	0.639795	-0.644319	0.0644577	1.10586	0.145171	0.723932	0.807552	-0.308373	0.0265003
ILMN_1770161	BST1	683	0.784041	-0.351	0.115597
ILMN_1723480	BST2	684	0.899378	-0.153	0.905405	0.867996	-0.204241	0.382733	0.709781	-0.494555	0.267257	1.06305	0.0882069	0.658843	0.86928	-0.202108	0.139087
ILMN_3238628	BSX	390259	1.04319	0.061	0.773559
ILMN_1676842	BTAF1	9044	1.15349	0.206	0.122277	0.949138	-0.0753101	0.382733	0.880884	-0.182976	0.711531	0.863853	-0.211143	0.0773886	0.801732	-0.318809	0.355226
ILMN_1691927	BTBD1	53339	1.19003	0.251	0.232987	1.00498	0.00717288	1	0.789908	-0.340244	0.5791	0.923334	-0.115075	0.536499	0.731165	-0.45173	0.0960923
ILMN_1809344	BTBD10	84280	0.832199	-0.265	0.024512	0.9967	-0.00476892	1	0.749539	-0.415925	0.267257	0.974316	-0.0375382	0.723932	0.732706	-0.448694	0.01623
ILMN_1705066	BTBD11	121551	1.12662	0.172	0.186219				1.25113	0.323229	0.540291	0.620187	-0.689224	1
ILMN_1732885	BTBD12	NA	1.12662	0.172	0.225066	1.07191	0.100183	0.662521	0.882874	-0.17972	1	0.962871	-0.0545858	0.723932	0.793065	-0.33449	0.355226
ILMN_1707481	BTBD15	NA	1.16797	0.224	0.116108	0.97731	-0.0331111	0.382733	0.818745	-0.288514	0.355226	1.06469	0.0904377	0.723932	0.89195	-0.164965	0.459543
ILMN_3238274	BTBD2	55643	0.940174	-0.089	0.559641	0.839005	-0.253248	0.0808556	0.783132	-0.352672	0.0644577	0.911706	-0.133359	0.250998	0.850991	-0.232784	0.5791
ILMN_1666653	BTBD3	22903	1.18591	0.246	0.145427	0.841826	-0.248406	0.0808556	0.816654	-0.292203	0.0644577	0.800644	-0.320766	0.0933977	0.776703	-0.364564	0.0644577
ILMN_1744725	BTBD6	90135	0.791686	-0.337	0.052784	0.96408	-0.0527747	0.382733	1.05328	0.0748864	0.5791	0.916739	-0.125417	0.658843	1.00156	0.00224375	0.853307
ILMN_1687743	BTBD7	55727	1.14552	0.196	0.25394	0.826333	-0.275205	0.19043	0.657504	-0.604928	0.0419616	0.855204	-0.225659	0.250998	0.680476	-0.555383	0.0419616
ILMN_1796773	BTBD8	284697	1.02598	0.037	0.860313
ILMN_1732271	BTBD9	114781	1.01537	0.022	0.91794	1.12938	0.175537	0.540291	1.04087	0.0577831	0.802587	0.849254	-0.235732	0.648077	0.782691	-0.353486	0.332922
ILMN_1699728	BTD	686	0.984184	-0.023	0.936319	0.984582	-0.0224172	0.662521	0.800506	-0.321016	0.267257	1.0689	0.0961335	0.929637	0.869064	-0.202466	0.5791
ILMN_2319414	BTF3	689	1.37554	0.46	0.000395	0.916505	-0.125785	0.0808556	0.800776	-0.320529	0.01623	0.929343	-0.105717	0.250998	0.887271	-0.172554	0.267257
ILMN_3309354	BTF3L1	NA				0.936044	-0.0953519	0.698535	1.14536	0.195802	0.513891	0.85796	-0.221018	0.477675	1.04982	0.0701353	0.867632
ILMN_2072140	BTF3L4	91408	1.11574	0.158	0.343445	1.22912	0.297629	0.662521	0.757664	-0.40037	0.267257	0.943908	-0.0832823	0.658843	0.709469	-0.495189	0.0644577
ILMN_1775743	BTG1	694	1.7219	0.784	0	0.97231	-0.0405116	1	1.13254	0.179568	0.459543	1.15005	0.201698	0.536499	1.33958	0.421778	0.355226
ILMN_1770085	BTG2	7832	1.09962	0.137	0.595663	0.996292	-0.00535946	1	1.22878	0.29723	0.711531	0.959002	-0.0603939	0.596242	1.18279	0.242196	0.5791
ILMN_2154836	BTG3	10950	0.913832	-0.13	0.636264
ILMN_1662026	BTK	695	1.16312	0.218	0.137967
ILMN_1778536	BTLA	151888	0.951318	-0.072	0.672739
ILMN_1698953	BTN1A1	696	1	0	0.998719
ILMN_2364852	BTN2A1	11120				1.09326	0.128636	0.662521	1.52798	0.611624	0.355226	0.91311	-0.13114	0.791082	1.27619	0.351848	0.195562
ILMN_1752758	BTN2A2	10385				1.29437	0.372251	1	1.39211	0.47727	0.19043	1.04453	0.0628608	0.685443	1.12341	0.167879	0.846451
ILMN_1721813	BTN2A3	NA										0.637805	-0.648812	1
ILMN_1802708	BTN3A1	11119	0.882703	-0.18	0.312339				0.934078	-0.0983845	0.77283	0.898016	-0.155186	1
ILMN_1700067	BTN3A2	11118	0.933033	-0.1	0.566992	0.874775	-0.193017	0.77283	0.995381	-0.00667881	0.867632	1.10448	0.143366	0.173485	1.25676	0.329704	0.0281858
ILMN_2373831	BTN3A3	10384	0.97942	-0.03	0.899411
ILMN_1815718	BTRC	8945	1.21672	0.283	0.042644	0.815017	-0.295098	0.0808556	0.578204	-0.79035	0.01623	0.959637	-0.0594393	0.750824	0.680803	-0.554692	0.0682475
ILMN_2202948	BUB1	699	1.00139	0.002	0.996526	1.09614	0.132427	1	0.725102	-0.463744	0.0644577	1.06912	0.0964275	1	0.707232	-0.499744	0.0644577
ILMN_1797307	BUB1B	701	1.0629	0.088	0.638357	1.07181	0.100056	1	0.693281	-0.528488	0.267257	1.02482	0.0353635	0.859819	0.66288	-0.59318	0.195562
ILMN_1778764	BUB3	9184	1.17365	0.231	0.123975	1.77245	0.825748	0.245278	0.654047	-0.612534	0.195562	1.22272	0.290093	0.563524	0.666331	-0.585688	0.0960923
ILMN_1749210	BUD13	84811	0.967276	-0.048	0.810561	0.968255	-0.0465409	0.662521	0.926999	-0.109361	0.459543	0.997162	-0.00409991	0.929637	0.954674	-0.0669197	0.853307
ILMN_1710697	BUD31	8896	1.07029	0.098	0.563991	0.964558	-0.05206	0.382733	1.0445	0.0628132	0.853307	0.877708	-0.188187	0.658843	0.950453	-0.0733133	0.5791
ILMN_1689237	BVES	11149	0.93174	-0.102	0.536215
ILMN_1682792	BYSL	705	1.66555	0.736	0	1.14425	0.194404	0.662521	1.09438	0.130116	1	1.02966	0.0421703	1	0.984786	-0.0221174	1
ILMN_1669208	BZRPL1	NA
ILMN_1704760	BZW1	9689	0.992404	-0.011	0.96667	0.555901	-0.8471	0.540291	0.811769	-0.300858	0.561276	0.794677	-0.33156	0.289315	1.21669	0.282957	0.561276
ILMN_1676548	BZW2	28969	1.37364	0.458	0.011228	0.962734	-0.0547907	1	0.892205	-0.164554	0.459543	0.951386	-0.0718975	0.658843	0.881688	-0.18166	0.459543
ILMN_1767556	C10ORF10	NA	0.764188	-0.388	0.007836	1.27284	0.34805	0.540291	1.22114	0.288229	0.360765	0.975811	-0.0353267	0.874826	0.936177	-0.0951472	0.846451
ILMN_1738955	C10ORF104	NA	1.06585	0.092	0.683597	0.946249	-0.079708	0.662521	0.84188	-0.248314	0.0419616	1.00733	0.0105402	0.929637	0.896226	-0.158066	0.459543
ILMN_3181538	C10ORF105	NA	1.07699	0.107	0.532095	0.792625	-0.33529	1	0.825875	-0.276004	0.355226	0.863822	-0.211195	0.162936	0.900059	-0.151909	0.358326
ILMN_1654413	C10ORF108	NA	1.07549	0.105	0.56498
ILMN_1799204	C10orf110	NA										1.33025	0.411698	0.77283
ILMN_1652715	C10orf111	NA										1.15298	0.20537	0.77283
ILMN_3230789	C10orf112	NA				0.976234	-0.0347008	0.540291	0.825081	-0.277393	0.148915	1.04872	0.0686283	0.77283	0.886343	-0.174064	0.540291
ILMN_2159300	C10ORF114	NA	1.05848	0.082	0.69692							0.930844	-0.103389	0.846451
ILMN_1680110	C10ORF116	NA	0.954621	-0.067	0.732361	0.870315	-0.20039	0.382733	0.772616	-0.372177	0.0644577	0.889438	-0.169034	0.377225	0.789592	-0.340822	0.01623
ILMN_1734010	C10ORF118	NA	1.09885	0.136	0.37636	0.698837	-0.516972	0.386476	0.772328	-0.372713	0.561276	1.13708	0.18533	0.540291	1.25666	0.329589	0.595883
ILMN_1761411	C10ORF119	NA	1.26751	0.342	0.0105	0.961764	-0.0562448	0.382733	0.876547	-0.190096	0.358326	0.883112	-0.179332	0.958122	0.804864	-0.313183	0.261572
ILMN_1665508	C10ORF12	NA	0.96393	-0.053	0.711245	1.12755	0.173197	1	1.02245	0.0320274	0.711531	0.85579	-0.224671	0.0773886	0.776017	-0.365841	0.139087
ILMN_1704785	C10ORF125	NA	0.896888	-0.157	0.246332
ILMN_1674046	C10ORF128	NA	1.00696	0.01	0.97156	1.03896	0.0551456	0.77283	1.00912	0.0130981	0.853307	1.07928	0.110064	0.268472	1.04827	0.0680161	0.513891
ILMN_1784933	C10orf129	NA
ILMN_1791656	C10ORF137	NA	1.1065	0.146	0.373733	0.919509	-0.121064	0.382733	0.861081	-0.215779	0.0960923	0.915789	-0.126913	0.331387	0.857597	-0.221628	0.267257
ILMN_3239861	C10ORF140	NA	1.05044	0.071	0.664253	0.938896	-0.0909621	0.371093	1.0288	0.0409586	0.540291	0.749184	-0.416608	0.245278	0.82092	-0.284687	0.386476
ILMN_2071682	C10orf141	NA										0.960646	-0.0579232	1
ILMN_1677311	C10ORF18	NA	0.97942	-0.03	0.890773							0.871724	-0.198056	0.312321
ILMN_1701243	C10ORF2	NA	1.85189	0.889	0	0.935589	-0.0960533	0.662521	0.921079	-0.118603	0.5791	1.39428	0.479522	1	1.37266	0.456972	0.5791
ILMN_1687478	C10orf21	NA				0.56194	-0.831511	0.245278	0.56763	-0.816978	0.0501862	0.929847	-0.104936	0.510068	0.93926	-0.0904029	0.561276
ILMN_1658830	C10ORF26	NA	1.0196	0.028	0.902431	0.88344	-0.178795	0.382733	0.878561	-0.186786	0.195562	0.804175	-0.31442	0.0340692	0.799733	-0.32241	0.139087
ILMN_1674373	C10ORF27	NA	1.03598	0.051	0.764945
ILMN_2158594	C10ORF28	NA	1.15349	0.206	0.305323	0.9905	-0.0137708	0.662521	1.13111	0.177736	0.355226	0.947095	-0.0784185	0.536499	1.08154	0.113089	0.355226
ILMN_1723921	C10orf30	NA							1.3642	0.448051	1
ILMN_1772706	C10ORF32	NA	1.04247	0.06	0.735467	0.937107	-0.0937137	0.662521	0.978094	-0.031955	0.459543	0.880008	-0.184411	0.289315	0.789527	-0.34094	0.195562
ILMN_1684497	C10ORF33	NA	0.972655	-0.04	0.876167	1.00677	0.00973723	1	1.08893	0.12291	0.853307	0.715715	-0.482543	0.791082	0.77412	-0.36937	0.853307
ILMN_1662470	C10orf35	NA				0.903055	-0.147114	1	0.973044	-0.0394227	1	0.93615	-0.0951885	0.377225	1.0087	0.0125027	1
ILMN_1747741	C10orf37	NA										0.998381	-0.00233715	0.698535	0.680505	-0.555322	0.540291
ILMN_1753490	C10ORF39	NA	1.03383	0.048	0.80561	0.798389	-0.324837	1	0.943796	-0.0834525	0.802587	1.12822	0.17405	0.915106	1.3337	0.415434	0.215925
ILMN_1765480	C10ORF4	NA	0.83047	-0.268	0.059941	0.70644	-0.501361	0.19043	0.671011	-0.575591	0.0960923	1.09805	0.134941	0.550985	0.870872	-0.199467	0.243345
ILMN_1660288	C10ORF41	NA	0.991717	-0.012	0.95744							0.965912	-0.0500356	0.595883
ILMN_1750338	C10ORF47	NA	1.05995	0.084	0.573706	1.10488	0.143887	1	1.10337	0.141914	1	0.928668	-0.106765	0.13332	0.880986	-0.182809	0.355226
ILMN_1759157	C10ORF51	NA	0.873573	-0.195	0.328499	0.948596	-0.0761338	0.19043	0.835809	-0.258754	0.494125	0.772666	-0.372084	0.138362	0.680797	-0.554704	0.195562
ILMN_1672717	C10ORF57	NA	0.846745	-0.24	0.195014	1.07409	0.103111	0.662521	0.944038	-0.0830829	0.5791	0.925555	-0.111609	0.331387	0.813491	-0.297802	0.0419616
ILMN_1754538	C10ORF58	NA	0.86814	-0.204	0.189189	0.98018	-0.0288811	0.662521	0.761085	-0.393871	0.0419616	0.94079	-0.0880554	0.250998	0.851792	-0.231427	0.0265003
ILMN_1718520	C10ORF59	NA	0.940174	-0.089	0.566148	1.33722	0.419239	0.19043	0.743742	-0.427126	0.361935	0.906805	-0.141136	0.385418	0.752912	-0.409446	0.139087
ILMN_1710207	C10ORF6	NA	1.1321	0.179	0.333644	0.851245	-0.232353	0.662521	0.767618	-0.38154	0.139087	0.910939	-0.134573	0.157704	0.821447	-0.28376	0.0644577
ILMN_1768077	C10ORF61	NA	0.895646	-0.159	0.376365	0.826268	-0.275318	0.0808556	0.795525	-0.33002	0.267257	0.934587	-0.0975988	0.216373	0.868163	-0.203962	0.139087
ILMN_1664488	C10ORF64	NA	0.924663	-0.113	0.408956				0.757347	-0.400974	1	0.836976	-0.256742	1
ILMN_1777591	C10orf65	NA				0.84865	-0.236758	0.662521	0.667324	-0.583542	0.184573	0.865304	-0.208721	0.430897	0.680419	-0.555504	0.125786
ILMN_1662791	C10ORF68	NA	0.900002	-0.152	0.398132
ILMN_1742473	C10ORF72	NA	0.824162	-0.279	0.042872
ILMN_1738047	C10ORF73	NA	1.13446	0.182	0.27888
ILMN_3192411	C10ORF75	NA	1.47019	0.556	4e-06	1.08983	0.124105	0.382733	0.851895	-0.231253	0.355226	1.03348	0.0475121	0.859819	0.807847	-0.307846	0.195562
ILMN_1792110	C10ORF76	NA	0.980099	-0.029	0.867524	1.05615	0.0788173	1	0.868192	-0.203914	0.195562	0.940024	-0.0892309	0.479929	0.772731	-0.371962	0.0265003
ILMN_1671905	C10ORF78	NA	1.11961	0.163	0.440009	1.02663	0.0379219	0.698535	0.875738	-0.191428	0.332922	0.795683	-0.329734	0.29627	0.845373	-0.24234	0.195562
ILMN_1805603	C10ORF79	NA	0.891929	-0.165	0.286791
ILMN_1757099	C10orf81	NA										0.886035	-0.174564	1
ILMN_1782861	C10orf82	143379				0.783109	-0.352715	0.386476	0.788972	-0.341953	0.215925	1.14891	0.200272	0.391267	1.15752	0.211034	0.561276
ILMN_2101719	C10ORF84	NA	1.11651	0.159	0.344206	1.08254	0.114418	1	1.0759	0.105547	0.918707	1.33761	0.419652	0.0728489	1.32941	0.410782	0.0682475
ILMN_1775423	C10ORF88	NA	1.24057	0.311	0.030055	0.831928	-0.26547	0.662521	0.69427	-0.526432	0.139087	1.22318	0.290633	0.331387	1.02078	0.0296709	0.853307
ILMN_1692568	C10ORF92	NA	0.993781	-0.009	0.97198
ILMN_1781654	C10ORF93	NA	0.95396	-0.068	0.750311
ILMN_1802192	C10ORF99	NA	0.962594	-0.055	0.764949
ILMN_2128967	C11ORF1	NA	1.09885	0.136	0.56519	0.835389	-0.259481	1	0.800848	-0.320399	0.711531	0.984962	-0.0218593	1	0.944238	-0.0827774	0.267257
ILMN_1786759	C11ORF10	NA	0.944092	-0.083	0.564718	1.03517	0.0498733	1	0.931705	-0.102055	0.139087	0.950485	-0.0732642	0.426777	0.855481	-0.225192	0.139087
ILMN_2267365	C11ORF17	NA	0.824734	-0.278	0.015017	0.608611	-0.716408	0.19043	0.627521	-0.672265	0.0960923	0.670968	-0.575684	0.148915	0.957343	-0.0628919	0.267257
ILMN_2077094	C11ORF2	NA	0.984184	-0.023	0.911216	0.892775	-0.163632	0.382733	0.807351	-0.308731	0.139087	1.0517	0.0727269	0.658843	0.951073	-0.0723724	0.853307
ILMN_3248086	C11ORF20	NA	1.14472	0.195	0.272885	0.647542	-0.626955	0.148915	0.912798	-0.131632	0.355226	0.648254	-0.625368	0.0171182	0.913802	-0.130046	0.906186
ILMN_1808163	C11ORF24	NA	0.940826	-0.088	0.688752	1.30798	0.387342	0.0808556	1.28085	0.357099	0.195562	0.975106	-0.0363697	0.216373	0.954877	-0.0666132	0.355226
ILMN_1812134	C11ORF30	NA	1.01326	0.019	0.936238
ILMN_1786872	C11ORF31	NA	1.00486	0.007	0.970281	0.866823	-0.20619	0.382733	0.680659	-0.554995	0.355226	1.05969	0.0836446	1	0.832106	-0.26516	0.459543
ILMN_1799053	C11ORF34	NA	1.00765	0.011	0.963307
ILMN_3306978	C11ORF36	NA	0.954621	-0.067	0.730382	1.19806	0.260696	0.19043	0.810688	-0.302782	0.0644577	1.13375	0.181102	0.289315	0.767173	-0.382376	0.267257
ILMN_1789804	C11orf37	NA
ILMN_1653836	C11ORF41	NA	0.808881	-0.306	0.014038
ILMN_1767642	C11orf46	NA				0.934149	-0.0982755	1	1.03985	0.0563768	0.711531	0.996708	-0.00475642	0.859819	1.10949	0.149896	0.711531
ILMN_1696826	C11ORF47	NA	1.0196	0.028	0.889611	0.808527	-0.306631	1	0.64379	-0.635337	0.540291	1.04412	0.0622917	0.816961	1.19607	0.258306	0.540291
ILMN_1739345	C11ORF48	NA	1.20581	0.27	0.118598	1.01742	0.0249197	0.662521	0.867268	-0.205451	0.195562	1.00447	0.00643207	0.791082	0.856225	-0.223938	0.195562
ILMN_2341487	C11ORF49	NA	0.903127	-0.147	0.369053	0.761372	-0.393327	0.19043	0.848921	-0.236298	0.139087	0.98711	-0.0187166	0.377225	0.733562	-0.447008	1
ILMN_1726104	C11ORF51	NA	1.02243	0.032	0.866657	0.93963	-0.0898356	0.382733	0.898045	-0.15514	0.355226	0.872051	-0.197516	0.0636898	0.833457	-0.26282	0.139087
ILMN_2050790	C11ORF52	NA	0.953299	-0.069	0.654257	0.865564	-0.208287	0.19043	0.885493	-0.175448	0.355226	1.02279	0.0325135	0.658843	1.04634	0.0653527	0.853307
ILMN_1674017	C11ORF53	NA	1.00486	0.007	0.976754
ILMN_2213297	C11ORF54	NA	1.10191	0.14	0.452588	0.89233	-0.164351	0.19043	0.789105	-0.341711	0.0644577	0.915185	-0.127865	0.479929	0.839184	-0.25294	0.139087
ILMN_1706842	C11orf55	NA
ILMN_1728965	C11ORF57	NA	1.07773	0.108	0.546962	0.928818	-0.106532	1	1.00443	0.00637722	0.853307	0.857043	-0.222561	0.658843	0.926812	-0.109651	0.5791
ILMN_3249949	C11ORF58	NA	1.30315	0.382	0.003533	1.18258	0.241939	0.662521	0.845652	-0.241864	0.195562	0.836159	-0.258151	0.13332	0.69522	-0.524459	0.195562
ILMN_1815878	C11ORF59	NA	0.804408	-0.314	0.032451	0.858271	-0.220494	0.0808556	0.768342	-0.38018	0.0644577	0.972758	-0.0398474	0.479929	0.870832	-0.199533	0.267257
ILMN_1677080	C11ORF60	NA	0.922743	-0.116	0.375143	0.800373	-0.321256	0.19043	0.806141	-0.310897	0.195562	0.952798	-0.0697579	0.791082	0.959664	-0.0593985	0.853307
ILMN_2073263	C11ORF61	NA	1.20247	0.266	0.088528	0.95222	-0.0706338	0.19043	1.13298	0.180126	0.459543	0.819873	-0.286528	0.0272754	0.975512	-0.0357688	0.5791
ILMN_1709050	C11ORF63	NA	0.88148	-0.182	0.242866	0.744075	-0.42648	0.148915	0.708839	-0.49647	0.0528075	0.738336	-0.43765	0.112351	0.687225	-0.541146	0.111612
ILMN_2045800	C11orf65	160140				0.890743	-0.166919	1	0.907192	-0.14052	0.595883	0.722191	-0.469548	0.165807	0.735527	-0.443149	0.453255
ILMN_1779163	C11ORF67	NA	0.786762	-0.346	0.001583	1.00191	0.00275972	1	0.922758	-0.115976	0.355226	0.995767	-0.00611985	0.859819	0.917096	-0.124855	0.459543
ILMN_1757847	C11ORF68	NA	1.3765	0.461	0.000872	0.948875	-0.0757096	0.662521	0.897828	-0.155489	0.5791	0.878044	-0.187635	0.185326	0.830807	-0.267414	0.355226
ILMN_2168520	C11ORF70	NA	0.97468	-0.037	0.865862	0.838197	-0.254639	0.382733	0.76855	-0.379788	0.195562	0.97639	-0.0344712	0.289315	0.83551	-0.259271	0.0644577
ILMN_2049693	C11orf71	54494				1.17654	0.234554	0.382733	1.30765	0.386981	0.355226	0.943943	-0.0832285	0.536499	1.04913	0.0691977	0.853307
ILMN_1781419	C11ORF73	NA	0.880259	-0.184	0.244584	0.940544	-0.0884333	0.382733	0.813641	-0.297536	0.0419616	1.14897	0.200344	0.426777	0.783674	-0.351674	0.0960923
ILMN_1659017	C11ORF74	NA	0.873573	-0.195	0.239634	0.868077	-0.204105	1	0.8123	-0.299916	0.195562	0.927804	-0.108107	0.426777	0.868189	-0.203919	0.0960923
ILMN_1798270	C11ORF75	NA	0.867539	-0.205	0.157853	0.887876	-0.17157	0.662521	0.824136	-0.279045	0.459543	1.02096	0.0299297	0.791082	0.947669	-0.0775456	0.355226
ILMN_1790637	C11ORF80	NA	0.953299	-0.069	0.745743	0.727344	-0.459291	0.662521	0.696323	-0.522172	0.139087	0.863902	-0.211061	0.216373	0.827056	-0.273942	0.0644577
ILMN_1790100	C11ORF82	NA	1.0367	0.052	0.770542	0.973694	-0.0384603	0.662521	0.760411	-0.395148	0.0419616	0.983724	-0.0236744	0.791082	0.768244	-0.380362	0.195562
ILMN_3240370	C11ORF83	NA	1.07326	0.102	0.634511	0.907436	-0.140132	0.382733	0.886557	-0.173715	0.195562	1.00428	0.00616054	0.929637	0.981172	-0.0274222	0.355226
ILMN_1795564	C11ORF84	NA	1.05555	0.078	0.667115	0.736299	-0.441636	0.19043	0.758496	-0.398787	0.139087	1.07763	0.107858	0.859819	1.11011	0.150706	1
ILMN_2182850	C11ORF85	NA	1.05848	0.082	0.656243
ILMN_3239232	C11orf86	254439
ILMN_1810376	C11ORF87	NA	0.978063	-0.032	0.877771
ILMN_1766038	C11ORF88	NA	1.02385	0.034	0.855725	0.264642	-1.91789	0.77283	0.249984	-2.00009	0.896125	0.826999	-0.274043	0.193931	0.781195	-0.356245	0.0960923
ILMN_3282138	C11ORF91	NA	1.12272	0.167	0.257906
ILMN_1777765	C12ORF10	NA	1.02669	0.038	0.820717	0.821907	-0.282953	0.662521	0.812746	-0.299124	0.267257	0.959305	-0.0599392	0.185326	0.948612	-0.0761101	0.355226
ILMN_2196337	C12ORF11	NA	1.35849	0.442	0.003265	1.09161	0.126464	0.19043	0.779876	-0.358683	0.355226	0.964844	-0.0516319	0.377225	0.689309	-0.536778	0.01623
ILMN_1758537	C12ORF12	NA	0.903753	-0.146	0.43164
ILMN_1804611	C12ORF23	NA	0.710054	-0.494	0.000302	1.18068	0.23962	1	1.04868	0.0685685	0.853307	0.814623	-0.295795	0.216373	0.723544	-0.466847	0.195562
ILMN_2180371	C12ORF24	NA	1.81252	0.858	0	1.13962	0.188553	0.662521	0.95204	-0.0709058	0.355226	0.937861	-0.0925541	0.185326	0.78349	-0.352013	0.01623
ILMN_1745497	C12ORF26	NA	0.909408	-0.137	0.415425	0.942291	-0.0857556	0.662521	0.727238	-0.4595	0.267257	0.910388	-0.135446	0.331387	0.702616	-0.509191	0.0265003
ILMN_1787199	C12orf28	NA				0.9127	-0.131787	1	0.625516	-0.676882	0.139087	1.08734	0.1208	0.791082	0.745203	-0.424294	0.0644577
ILMN_1792671	C12ORF29	NA	1.28521	0.362	0.020754	1.21443	0.280276	0.662521	1.23544	0.305024	0.5791	0.931598	-0.102221	0.479929	0.947717	-0.0774721	0.711531
ILMN_2077733	C12ORF30	NA	1.34164	0.424	0.001491	0.864947	-0.209316	0.382733	0.783439	-0.352107	0.139087	0.881824	-0.181438	0.479929	0.778254	-0.361686	0.474959
ILMN_2122176	C12ORF31	NA	1.1599	0.214	0.152264	1.0136	0.0194893	1	0.999084	-0.00132174	0.853307	0.873086	-0.195805	0.250998	0.860582	-0.216616	1
ILMN_2105923	C12ORF32	NA	0.874179	-0.194	0.204985	0.96328	-0.0539734	0.382733	0.851497	-0.231927	0.0419616	0.84431	-0.244156	0.111961	0.746333	-0.422109	0.0644577
ILMN_1772446	C12ORF34	NA	1.01607	0.023	0.915759	0.799195	-0.323381	0.19043	0.548337	-0.866866	0.0524795	1.34484	0.427431	0.430897	0.922709	-0.116053	0.474959
ILMN_2229922	C12ORF35	NA	1.05555	0.078	0.690716	1.21765	0.284103	0.662521	1.56131	0.642758	0.355226	0.953533	-0.0686448	0.13332	1.23576	0.305402	0.355226
ILMN_1755414	C12orf36	NA
ILMN_1757142	C12ORF37	NA	1.13524	0.183	0.160797							0.701887	-0.51069	1
ILMN_1751898	C12ORF4	NA	0.941478	-0.087	0.579005	0.82867	-0.271131	0.382733	0.810338	-0.303405	0.195562	0.874128	-0.194083	0.658843	0.85479	-0.226357	0.459543
ILMN_1721569	C12ORF40	NA	0.993093	-0.01	0.963169							1.08375	0.116038	1	1.13333	0.180564	0.386476
ILMN_1713189	C12ORF41	NA	1.45498	0.541	3.7e-05	0.953973	-0.0679796	1	1.1371	0.185365	0.5791	0.899043	-0.153537	1	1.07163	0.0998073	0.459543
ILMN_2169856	C12ORF43	NA	1.20414	0.268	0.012381	0.920037	-0.120236	0.382733	0.680352	-0.555647	0.0419616	1.02836	0.040347	0.426777	0.743656	-0.427293	0.0419616
ILMN_1772527	C12ORF44	NA	1.39668	0.482	5.5e-05	0.920942	-0.118817	0.19043	0.921916	-0.117292	0.853307	0.993896	-0.00883296	0.596242	0.994947	-0.00730841	1
ILMN_1728435	C12ORF45	NA	1.31312	0.393	0.002454	0.812008	-0.300434	0.662521	0.723279	-0.467376	0.0644577	1.07003	0.0976568	1	0.95311	-0.0692849	0.355226
ILMN_1798957	C12orf47	NA				0.873043	-0.195875	0.662521	0.958605	-0.0609921	0.853307	1.11203	0.153197	0.658843	1.22101	0.288079	0.195562
ILMN_1654429	C12ORF48	NA	0.83915	-0.253	0.097219	0.94856	-0.0761887	0.662521	0.718112	-0.477718	0.01623	0.640679	-0.642326	0.112351	0.424624	-1.23574	0.01623
ILMN_2161556	C12ORF49	NA	1.04681	0.066	0.75511	1.02609	0.0371512	1	1.02967	0.0421822	1	1.02888	0.0410685	0.929637	1.03247	0.0460995	0.5791
ILMN_1791792	C12ORF5	NA	1.0403	0.057	0.775251	0.939517	-0.0900082	0.662521	0.831635	-0.265977	0.459543	0.958268	-0.0614982	0.331387	0.848233	-0.237467	0.267257
ILMN_2105298	C12ORF50	NA	1.15829	0.212	0.124217
ILMN_3244516	C12ORF51	NA	0.946714	-0.079	0.664291	0.769178	-0.37861	0.19043	0.84037	-0.250903	0.459543	0.851799	-0.231416	0.859819	0.930638	-0.103708	0.711531
ILMN_1667857	C12ORF52	NA	0.941478	-0.087	0.571552	0.855518	-0.225131	1	0.825353	-0.276916	0.711531	1.00844	0.0121274	0.791082	0.972885	-0.0396583	0.711531
ILMN_1675616	C12ORF54	NA	0.934975	-0.097	0.572936
ILMN_1770616	C12ORF56	NA	1.01255	0.018	0.936238
ILMN_1812191	C12ORF57	NA	1.00905	0.013	0.949447	0.82138	-0.283879	1	0.831764	-0.265754	0.711531	0.913727	-0.130165	0.185326	0.925279	-0.11204	0.195562
ILMN_1727606	C12ORF59	NA	1.00626	0.009	0.964169	1.16871	0.224917	0.662521	0.976549	-0.0342355	0.459543	0.927427	-0.108694	0.929637	0.774938	-0.367847	0.0644577
ILMN_2234709	C12orf60	144608				1.21142	0.276701	1	0.942239	-0.0858346	0.711531	0.781334	-0.355988	0.216373	0.58233	-0.780091	0.0960923
ILMN_1804656	C12ORF62	NA	0.815638	-0.294	0.066496	0.886969	-0.173045	1	0.715503	-0.48297	0.0644577	1.067	0.0935605	0.377225	0.860732	-0.216365	0.0644577
ILMN_1658477	C12ORF64	NA	0.997231	-0.004	0.981234
ILMN_1667510	C12orf65	91574				1.08267	0.114596	0.382733	1.28956	0.366881	0.459543	0.911357	-0.133912	0.929637	1.08551	0.118372	0.355226
ILMN_1736995	C12orf66	144577				0.957784	-0.0622273	0.382733	1.25789	0.331006	0.5791	0.874999	-0.192647	0.859819	1.14917	0.200587	0.5791
ILMN_1789323	C12ORF67	NA	0.998615	-0.002	0.992834
ILMN_3245006	C12ORF68	NA	0.964598	-0.052	0.812518	0.843622	-0.245332	0.77283	0.685216	-0.545369	0.0960923	0.851573	-0.231798	0.470486	0.691675	-0.531834	0.0896481
ILMN_1756939	C12orf69	NA										1.11718	0.159865	0.540291
ILMN_1844083	C12ORF71	NA	0.941478	-0.087	0.648432
ILMN_3241041	C12orf73	728568				0.909139	-0.137427	0.540291	0.998689	-0.00189279	0.883617	0.866593	-0.206574	0.443289	0.951952	-0.0710394	1
ILMN_2152429	C12ORF76	NA	1.27015	0.345	0.013673	1.00428	0.00616094	1	0.96108	-0.0572721	1	0.843982	-0.244716	0.250998	0.807677	-0.308149	0.5791
ILMN_3247187	C12orf77	196415				1.45276	0.538796	0.662521	1.20256	0.266103	0.459543	1.20439	0.268308	0.536499	0.996965	-0.00438473	0.853307
ILMN_1696035	C12orf8	NA				1.02101	0.0299971	1
ILMN_2223350	C13orf1	NA				1.00052	0.00074682	1	0.859356	-0.218672	0.5791	0.887069	-0.172882	0.331387	0.761913	-0.392301	0.0419616
ILMN_1658494	C13ORF15	NA	0.948027	-0.077	0.744418	0.453818	-1.13982	0.148915	0.46223	-1.11332	0.409395	1.06271	0.0877543	0.665006	1.08241	0.114253	0.759463
ILMN_2042792	C13ORF16	NA	1.01396	0.02	0.95743
ILMN_2391551	C13ORF23	NA	1.21167	0.277	0.037969	1.05172	0.0727559	0.662521	0.964431	-0.0522498	0.459543	0.820948	-0.284637	0.13332	0.75281	-0.409642	0.0419616
ILMN_1660754	C13ORF25	NA	1.19416	0.256	0.031631	1.37514	0.459575	0.19043	1.07271	0.101257	0.711531	1.13512	0.18284	0.596242	0.885474	-0.175478	0.5791
ILMN_1726054	C13ORF26	NA	0.838568	-0.254	0.09066
ILMN_1682774	C13ORF27	NA	1.14155	0.191	0.24709	0.961447	-0.0567208	0.382733	0.905487	-0.143235	0.853307	1.12785	0.173578	0.859819	1.06221	0.0870636	0.5791
ILMN_3181474	C13ORF29	NA	0.938221	-0.092	0.603845				0.986069	-0.0202393	0.723674	1.03947	0.0558432	0.902523
ILMN_1736816	C13orf3	NA				0.866893	-0.206074	0.662521	0.640912	-0.641803	0.0644577	1.10861	0.148747	0.723932	0.819615	-0.286981	0.0960923
ILMN_1761486	C13ORF34	NA	0.993093	-0.01	0.973955	1.01434	0.0205345	1	0.715767	-0.482438	0.0419616	0.957121	-0.0632273	0.723932	0.675393	-0.5662	0.0644577
ILMN_3246728	C13ORF36	NA	0.933033	-0.1	0.402522
ILMN_3243945	C13ORF37	NA	0.961928	-0.056	0.810967	0.915272	-0.127728	0.662521	0.930944	-0.103234	0.853307	0.8307	-0.267601	0.250998	0.844923	-0.243108	0.355226
ILMN_1755882	C13ORF7	NA	1.30858	0.388	0.004947	1.16906	0.225354	0.382733	0.692104	-0.530938	0.355226	1.30967	0.389207	0.185326	0.775347	-0.367085	0.195562
ILMN_1700276	C14ORF100	NA	0.951978	-0.071	0.697085	1.08717	0.120572	0.662521	0.824275	-0.278803	0.5791	0.946509	-0.079312	0.596242	0.717631	-0.478686	0.0960923
ILMN_1758093	C14ORF101	NA	1.02883	0.041	0.811532	1.13169	0.178485	1	1.17498	0.232639	0.853307	0.718414	-0.477112	0.0385612	0.745894	-0.422958	0.0524795
ILMN_2374076	C14ORF102	NA	1.04826	0.068	0.668856	0.758016	-0.399699	0.0808556	0.815367	-0.294478	0.01623	0.872757	-0.196349	0.00356863	0.938789	-0.0911275	0.355226
ILMN_1769757	C14ORF104	NA	1.54114	0.624	0.000248	0.994231	-0.00834694	1	1.00545	0.0078463	0.853307	0.899796	-0.15233	0.596242	0.909952	-0.136137	1
ILMN_1807667	C14orf105	NA							0.820344	-0.2857	0.802587	0.814367	-0.296249	0.245278
ILMN_1666208	C14ORF106	NA	0.982821	-0.025	0.917356	1.07842	0.108916	1	0.914142	-0.12951	0.267257	0.930493	-0.103933	0.331387	0.788751	-0.342359	0.0419616
ILMN_3193306	C14ORF109	NA	1.30405	0.383	0.000429	1.0308	0.0437676	1	1.08207	0.11379	1	0.885407	-0.175587	0.791082	0.929442	-0.105564	0.5791
ILMN_1660812	C14ORF11	NA	1.07326	0.102	0.539332	0.962124	-0.0557061	0.662521	0.874165	-0.194022	0.5791	1.09533	0.131371	1	0.995198	-0.00694449	0.853307
ILMN_1706305	C14ORF112	NA	0.985549	-0.021	0.938468	0.995923	-0.00589446	1	0.841532	-0.24891	0.139087	0.978069	-0.0319918	0.596242	0.826446	-0.275007	0.0265003
ILMN_2055218	C14ORF115	NA	1.13288	0.18	0.189504
ILMN_1699091	C14ORF118	NA	0.920826	-0.119	0.346631	0.917533	-0.124168	0.662521	1.06009	0.0841904	0.918707	0.949566	-0.0746603	0.540291	1.08749	0.120997	0.918707
ILMN_1682102	C14orf119	55017
ILMN_1777708	C14ORF121	NA	1.04826	0.068	0.694338	0.728144	-0.457704	0.19043	0.851921	-0.231208	0.0265003	0.815606	-0.294056	0.0171182	0.95425	-0.0675603	0.355226
ILMN_1771629	C14ORF124	NA	1.1042	0.143	0.33546	0.809268	-0.305311	0.662521	1.08062	0.111866	0.5791	0.93827	-0.0919248	0.859819	1.25288	0.325252	0.355226
ILMN_1692588	C14ORF125	NA	1.02172	0.031	0.879309	0.992973	-0.0101735	0.662521	0.741001	-0.432453	0.0960923	1.01269	0.018196	0.479929	0.755716	-0.404084	0.355226
ILMN_1704238	C14orf126	NA				1.09189	0.126821	0.662521	1.07271	0.101259	0.711531	0.846257	-0.240832	0.479929	0.831395	-0.266394	0.195562
ILMN_1804908	C14orf128	NA										1.17889	0.237431	0.648503	1.2822	0.35862	1
ILMN_1712748	C14ORF129	NA	0.945402	-0.081	0.646098	1.16329	0.218208	0.662521	1.01944	0.0277799	0.853307	0.976406	-0.0344465	0.791082	0.727507	-0.458967	0.355226
ILMN_2186858	C14ORF131	NA	0.883927	-0.178	0.196516	0.933982	-0.0985334	0.662521	0.853497	-0.228543	0.0644577	0.877508	-0.188516	0.859819	0.801889	-0.318525	0.195562
ILMN_1713744	C14ORF132	NA	1.074	0.103	0.53609	1.03289	0.0466815	1	0.870948	-0.199342	0.139087	0.888815	-0.170045	0.0520588	0.749464	-0.416069	0.01623
ILMN_1734440	C14ORF133	NA	0.954621	-0.067	0.744418	0.893533	-0.162407	0.662521	0.833145	-0.263361	0.195562	0.975093	-0.036388	0.536499	0.909193	-0.137342	0.267257
ILMN_1680781	C14ORF135	NA	0.976032	-0.035	0.854417	1.1257	0.170828	0.662521	0.936452	-0.0947237	0.139087	0.832618	-0.264273	0.0520588	0.751163	-0.412803	0.0644577
ILMN_2394193	C14ORF138	NA	1.28967	0.367	0.010095	0.965789	-0.0502197	0.662521	1.02064	0.0294708	0.459543	1.01943	0.0277583	0.859819	1.07732	0.107449	0.459543
ILMN_1684357	C14ORF139	NA	1.05555	0.078	0.687934	0.769982	-0.377103	1	0.642737	-0.637699	0.540291	0.803452	-0.315717	0.105193	0.670676	-0.576313	0.288844
ILMN_1685781	C14ORF142	NA	1.1479	0.199	0.382488	0.957366	-0.0628572	0.382733	1.0394	0.0557574	0.853307	0.950772	-0.0728291	0.859819	1.03225	0.0457855	0.5791
ILMN_2193315	C14ORF143	NA	1.11651	0.159	0.308995	0.980021	-0.029115	0.662521	0.901171	-0.150127	0.0960923	0.907234	-0.140454	0.377225	0.83424	-0.261466	0.0265003
ILMN_1806825	C14ORF145	NA	0.814508	-0.296	0.060141	1.33241	0.414037	1	0.898431	-0.15452	0.267257	0.926929	-0.109469	0.658843	0.62502	-0.678026	0.0419616
ILMN_1699676	C14ORF147	NA	1.43893	0.525	1e-05	0.989196	-0.0156725	0.662521	0.791487	-0.337363	0.0419616	0.924865	-0.112686	0.596242	0.740014	-0.434376	0.0960923
ILMN_1667374	C14ORF149	NA	1.1088	0.149	0.472702	1.35882	0.442356	0.19043	0.892915	-0.163405	0.459543	1.08059	0.111824	0.596242	0.79758	-0.3263	0.459543
ILMN_1662895	C14orf153	NA				0.606082	-0.722414	0.540291	0.757788	-0.400133	0.711531	0.607586	-0.718841	0.19043	0.92198	-0.117192	0.711531
ILMN_1661945	C14ORF156	NA	1.35943	0.443	9.6e-05	0.938971	-0.0908479	0.0808556	0.833487	-0.262768	0.01623	0.973633	-0.0385494	0.929637	0.864256	-0.21047	0.139087
ILMN_1721106	C14orf159	NA				0.878451	-0.186967	0.662521	0.80869	-0.306342	0.195562	0.87928	-0.185605	0.250998	0.809454	-0.30498	0.139087
ILMN_1775121	C14ORF162	NA	0.952638	-0.07	0.719955
ILMN_1696708	C14ORF166	NA	0.966606	-0.049	0.820902	0.911481	-0.133715	0.662521	0.788138	-0.34348	0.0265003	1.05545	0.0778576	0.791082	0.912624	-0.131907	0.139087
ILMN_1784464	C14ORF166B	NA	1.00975	0.014	0.942481							1.04496	0.063445	0.77283	0.954225	-0.0675985	0.698535
ILMN_3261811	C14orf167	NA				1.09765	0.134417	0.662521	1.05371	0.0754847	0.355226	0.887117	-0.172803	0.479929	0.950264	-0.0735998	0.5791
ILMN_1711543	C14ORF169	NA	1.13288	0.18	0.156612	0.982705	-0.0251704	1	0.854926	-0.226128	0.267257	1.0493	0.0694225	0.479929	0.912859	-0.131535	0.5791
ILMN_2393450	C14ORF173	NA	0.807761	-0.308	0.025841	0.870724	-0.199712	0.382733	0.793792	-0.333167	0.195562	0.895201	-0.159716	0.377225	0.816106	-0.293171	0.267257
ILMN_3243606	C14ORF174	NA	0.92723	-0.109	0.481445	1.0728	0.101383	1	1.06536	0.0913356	0.459543	0.893559	-0.162366	0.250998	0.887357	-0.172413	0.267257
ILMN_1756877	C14ORF179	NA	0.989657	-0.015	0.956651	0.868589	-0.203254	0.382733	0.741952	-0.430602	0.0644577	1.01725	0.0246776	0.791082	0.868941	-0.20267	0.0419616
ILMN_1689560	C14ORF181	NA	1.11884	0.162	0.256855	1.18417	0.24388	0.386476	0.980538	-0.0283549	0.906186	1.15718	0.210616	0.331387	0.958189	-0.0616185	1
ILMN_1654386	C14ORF182	NA	0.908148	-0.139	0.252266
ILMN_2157709	C14ORF19	NA	1.28254	0.359	0.00798	1.27339	0.348672	0.19043	1.01991	0.0284351	1	1.1689	0.225156	0.772337	0.93622	-0.0950808	0.474959
ILMN_1652722	C14ORF2	NA	0.885154	-0.176	0.301517	0.89292	-0.163397	0.382733	0.881883	-0.181341	0.139087	0.923022	-0.115563	0.250998	0.911613	-0.133507	0.5791
ILMN_1698085	C14ORF21	NA	0.99103	-0.013	0.945211				1.10252	0.140803	1	0.813845	-0.297174	0.540291
ILMN_1807728	C14ORF23	NA	1.00905	0.013	0.957384
ILMN_1807031	C14ORF28	NA	0.875391	-0.192	0.179207	1.2708	0.345739	0.382733	0.957752	-0.0622763	0.853307	1.34642	0.42913	0.13332	1.01474	0.0211144	0.853307
ILMN_1779279	C14ORF32	NA	1.15109	0.203	0.248473	1.14907	0.200468	1	0.930087	-0.104563	0.853307	0.788469	-0.342873	0.0933977	0.638206	-0.647905	0.0960923
ILMN_1796377	C14ORF37	NA	0.797745	-0.326	0.050162
ILMN_2185077	C14ORF39	NA	1.02101	0.03	0.876521
ILMN_1804396	C14ORF4	NA	1.19416	0.256	0.089427	1.18059	0.239508	0.662521	1.06201	0.0867941	0.853307	1.04494	0.0634149	0.479929	0.939979	-0.0892995	0.5791
ILMN_2412922	C14ORF43	NA	1.33515	0.417	0.005155	0.895124	-0.159841	0.662521	0.958455	-0.0612171	0.711531	0.901843	-0.149052	0.13332	0.96565	-0.0504281	0.459543
ILMN_1806456	C14ORF45	NA	0.863938	-0.211	0.111855	0.785403	-0.348496	0.662521	0.792011	-0.336407	0.267257	0.723202	-0.467529	0.0422601	0.824584	-0.278263	0.459543
ILMN_1668914	C14ORF48	NA	0.970634	-0.043	0.815306
ILMN_1718925	C14ORF49	NA	1.01255	0.018	0.93783
ILMN_3180114	C14ORF65	NA	1.07326	0.102	0.525412	1.45423	0.540254	0.245278	1.16542	0.220856	0.487453	0.866631	-0.20651	0.350238	0.694522	-0.525908	0.239985
ILMN_1803300	C14ORF68	NA	0.943438	-0.084	0.661605
ILMN_1773017	C14ORF73	NA	1.06437	0.09	0.587719
ILMN_1790688	C14ORF78	NA	1.1479	0.199	0.191235	0.830516	-0.267921	0.382733	0.86759	-0.204916	0.459543	0.836718	-0.257187	0.157704	0.874069	-0.194182	0.195562
ILMN_1686082	C14ORF79	NA	1.10114	0.139	0.348619	0.79555	-0.329976	0.19043	0.957342	-0.0628932	1	0.866717	-0.206368	0.216373	1.04298	0.0607156	0.355226
ILMN_1653553	C14ORF80	NA	0.946058	-0.08	0.725591	0.932611	-0.100653	1	0.892205	-0.164553	0.267257	0.918308	-0.122951	0.723932	0.878521	-0.186851	0.267257
ILMN_1690443	C14orf82	NA				1.20192	0.265345	0.19043	1.06423	0.089811	0.853307	1.25681	0.329772	0.0520588	1.11283	0.154238	0.459543
ILMN_2134381	C14orf85	NA				0.82977	-0.269216	0.662521	0.86458	-0.209929	0.459543	0.88351	-0.178681	1	0.920574	-0.119394	0.459543
ILMN_1724897	C14ORF93	NA	1.02954	0.042	0.815824	0.871212	-0.198905	0.0808556	0.968684	-0.0459024	1	0.969874	-0.0441303	0.111961	1.07838	0.108872	0.355226
ILMN_1657744	C15ORF17	NA	1.01677	0.024	0.92188	1.06307	0.0882365	0.662521	1.06833	0.0953546	0.459543	0.887607	-0.172008	0.216373	0.891997	-0.164889	0.139087
ILMN_1801053	C15orf2	NA				0.819225	-0.287668	1							0.731219	-0.451624	1
ILMN_1737699	C15ORF20	NA	1.07475	0.104	0.601233	0.892078	-0.164759	0.540291	0.909717	-0.13651	0.540291	0.813301	-0.298139	1	0.829383	-0.26989	1
ILMN_1696031	C15ORF21	NA	1.02243	0.032	0.871665	1.14496	0.195294	1	0.713081	-0.487862	0.0644577	1.00943	0.0135468	0.929637	0.628677	-0.66961	0.139087
ILMN_1652008	C15ORF23	NA	0.980099	-0.029	0.890629	1.17023	0.226794	0.382733	0.829055	-0.27046	0.139087	1.04729	0.0666576	0.536499	0.826331	-0.275208	0.0960923
ILMN_2150000	C15ORF24	NA	0.821311	-0.284	0.012299	1.04685	0.0660547	0.662521	0.946076	-0.0799721	0.267257	0.896249	-0.158029	0.596242	0.809972	-0.304056	0.355226
ILMN_1686373	C15orf26	NA
ILMN_1686662	C15orf28	NA				0.682036	-0.552081	0.245278	0.86545	-0.208478	0.846451	0.806149	-0.310882	0.713303	1.02294	0.0327216	0.816961
ILMN_1739854	C15ORF29	NA	0.983502	-0.024	0.906524	0.908725	-0.138084	0.662521	0.867302	-0.205393	0.0644577	0.903232	-0.146832	0.250998	0.862059	-0.214142	0.459543
ILMN_3268535	C15ORF34	NA	1.05995	0.084	0.736391	1.2703	0.345173	0.540291	1.069	0.0962661	1	1.01408	0.0201663	0.432035	0.853379	-0.228741	0.867632
ILMN_2189406	C15ORF38	NA	0.984184	-0.023	0.91527	1.03642	0.0516087	1	0.813103	-0.29849	0.139087	0.986108	-0.0201823	0.791082	0.773632	-0.370281	0.0265003
ILMN_1793729	C15orf39	56905				0.910341	-0.135521	0.662521	0.848201	-0.237521	0.853307	1.02531	0.0360555	0.791082	0.955319	-0.0659449	1
ILMN_1660585	C15orf40	123207				0.866387	-0.206916	0.19043	1.03963	0.0560644	1	1.09044	0.124913	0.791082	1.30848	0.387893	0.355226
ILMN_1747217	C15ORF41	NA	1.06585	0.092	0.589431	1.03862	0.0546736	0.662521	0.81199	-0.300465	0.15558	1.11889	0.162062	0.943057	0.874738	-0.193076	0.254451
ILMN_1674662	C15ORF42	NA	0.957272	-0.063	0.755967	0.798837	-0.324027	0.662521	0.667844	-0.582416	0.125786	1.12301	0.167374	0.885234	0.938862	-0.0910155	0.459543
ILMN_1791376	C15ORF43	NA	1.06955	0.097	0.476228
ILMN_1771326	C15ORF44	NA	1.21504	0.281	0.049302	0.789671	-0.340675	0.382733	0.643548	-0.635881	0.195562	0.761501	-0.393082	0.111961	0.69207	-0.53101	0.355226
ILMN_1805410	C15ORF48	NA	0.787854	-0.344	0.329177	1.05632	0.07905	1	1.66793	0.738061	0.355226	0.740461	-0.433504	0.662521	1.21444	0.280295	0.459543
ILMN_3182984	C15ORF49	NA	1.1042	0.143	0.297949
ILMN_1775330	C15orf52	NA				1.06981	0.0973589	0.662521	1.07589	0.105527	0.853307	0.97531	-0.0360674	0.289315	0.980847	-0.0278997	0.711531
ILMN_1812249	C15orf54	400360										1.00634	0.00911747	1	0.979493	-0.0298932	1
ILMN_2413318	C15ORF57	NA	0.850274	-0.234	0.146977	0.822045	-0.28271	0.382733	0.921568	-0.117837	0.711531	0.809441	-0.305002	0.157704	0.980872	-0.0278637	0.459543
ILMN_1810855	C15orf58	NA
ILMN_2141118	C15ORF59	NA	0.96393	-0.053	0.753246	0.580354	-0.784995	0.19043	0.648196	-0.625498	0.01623	0.876663	-0.189905	0.596242	0.979143	-0.0304081	1
ILMN_2145490	C15ORF60	NA	0.837987	-0.255	0.076082
ILMN_3248556	C15ORF62	NA	1.01677	0.024	0.921026				0.948145	-0.0768207	0.561276	0.876975	-0.189393	0.0661926
ILMN_1663484	C15ORF63	NA	1.04391	0.062	0.711369	1.01976	0.0282236	0.540291	0.712813	-0.488405	0.355226	0.979516	-0.0298593	0.723932	1.10693	0.146561	0.711531
ILMN_2185427	C16ORF11	NA	1.01677	0.024	0.902505
ILMN_1774990	C16ORF13	NA	1.35849	0.442	0.00035	0.785099	-0.349054	0.0808556	0.750326	-0.41441	0.01623	0.82667	-0.274617	0.185326	0.725283	-0.463385	0.0644577
ILMN_1751559	C16ORF30	NA	0.865737	-0.208	0.192488
ILMN_1801118	C16ORF33	NA	0.759436	-0.397	0.007161	1.05972	0.0836773	1	0.833885	-0.26208	0.0960923	0.986838	-0.0191145	0.929637	0.776538	-0.364872	0.0644577
ILMN_1733581	C16ORF35	NA	1.12818	0.174	0.196109	0.882501	-0.18033	0.19043	0.728656	-0.45669	0.0419616	0.951487	-0.0717435	0.426777	0.785616	-0.348103	0.0265003
ILMN_1799100	C16ORF38	NA	1.01677	0.024	0.899445	1.01087	0.0155941	0.77283	0.841166	-0.249538	0.358326	1.13095	0.177531	0.941653	0.941086	-0.0876012	0.561276
ILMN_1713884	C16ORF42	NA	0.902501	-0.148	0.324766	0.781825	-0.355083	0.662521	0.806331	-0.310557	0.195562	0.933639	-0.0990636	0.723932	0.962903	-0.0545377	0.355226
ILMN_1687821	C16ORF45	NA	0.997923	-0.003	0.99046
ILMN_1667665	C16orf46	123775										0.8806	-0.183441	1
ILMN_1784128	C16ORF47	NA	1.01466	0.021	0.908518
ILMN_1787324	C16ORF48	NA	1.15589	0.209	0.097373	0.876204	-0.190661	0.662521	0.789702	-0.340619	0.459543	0.988781	-0.0162773	0.426777	0.891165	-0.166235	0.355226
ILMN_1815812	C16ORF5	NA	0.97468	-0.037	0.858209
ILMN_1656871	C16orf50	NA
ILMN_1717324	C16ORF52	NA	1.08298	0.115	0.492953	1.05533	0.0776925	0.382733	0.989461	-0.0152855	0.897279	0.875736	-0.191432	0.432035	0.821078	-0.28441	0.254451
ILMN_1727444	C16ORF53	NA	0.944092	-0.083	0.71765	1.048	0.0676449	0.19043	0.807893	-0.307764	0.0419616	0.875222	-0.192279	0.929637	0.674697	-0.567688	0.01623
ILMN_1681032	C16ORF54	NA	1.02598	0.037	0.866489	0.80417	-0.314428	0.698535	0.617417	-0.695682	0.148915	0.819597	-0.287014	0.518605	0.629262	-0.668268	0.066753
ILMN_1759261	C16orf55	NA				0.967305	-0.047958	1							1.01256	0.0180075	1
ILMN_1777129	C16ORF56	NA	0.922743	-0.116	0.614114	0.740256	-0.433904	0.0808556	0.751913	-0.411362	0.195562	0.825886	-0.275985	0.0520588	0.838892	-0.253443	0.195562
ILMN_1765880	C16ORF57	NA	0.825878	-0.276	0.077654	0.910307	-0.135574	0.19043	0.941323	-0.0872382	0.459543	0.959685	-0.0593664	0.791082	0.992383	-0.0110303	1
ILMN_1685289	C16orf58	64755				0.883138	-0.17929	0.662521	0.842149	-0.247853	0.139087	0.958266	-0.0615013	0.157704	0.913791	-0.130064	0.0960923
ILMN_1656452	C16ORF59	NA	0.929161	-0.106	0.5704	0.885146	-0.176013	0.382733	0.74432	-0.426005	0.0644577	1.05983	0.0838269	0.859819	0.891208	-0.166165	0.267257
ILMN_1783333	C16ORF61	NA	1.03958	0.056	0.802959	0.922298	-0.116695	0.662521	0.764192	-0.387994	0.0265003	1.04588	0.0647202	0.791082	0.86659	-0.206578	0.0419616
ILMN_1729450	C16ORF62	NA	0.988286	-0.017	0.953587	0.6642	-0.590309	0.382733	0.723743	-0.46645	0.0524795	0.949831	-0.0742571	0.948533	1.03498	0.0496018	0.897279
ILMN_1790650	C16ORF63	NA	1.15669	0.21	0.114023	1.04836	0.0681355	1	0.952197	-0.070668	0.711531	0.961578	-0.0565248	0.331387	0.873374	-0.195328	0.0419616
ILMN_1658290	C16ORF68	NA	1.07624	0.106	0.723976	0.826891	-0.274231	0.382733	1.45735	0.54335	0.355226	0.908751	-0.138043	0.658843	1.60163	0.679538	0.0960923
ILMN_2135991	C16ORF69	NA	1.03958	0.056	0.812418							0.922572	-0.116266	0.859684	1.04536	0.064004	1
ILMN_1693630	C16ORF7	NA	0.80107	-0.32	0.011214	0.792364	-0.335764	0.0808556	0.995686	-0.00623667	0.459543	0.719461	-0.475011	0.216373	0.904076	-0.145483	0.355226
ILMN_1711703	C16ORF70	NA	1.05117	0.072	0.63523	1.00346	0.00498137	1	1.11859	0.161679	1	0.844622	-0.243622	0.185326	0.941527	-0.086925	0.711531
ILMN_1773407	C16ORF72	NA	1.2518	0.324	0.021776	0.807785	-0.307956	0.19043	0.687276	-0.541039	0.01623	0.916724	-0.125441	0.426777	0.779962	-0.358524	0.195562
ILMN_1806149	C16ORF74	NA	1.01607	0.023	0.908053	0.622194	-0.684563	0.0808556	0.746845	-0.421119	0.01623	0.780961	-0.356677	0.216373	0.93742	-0.0932322	0.459543
ILMN_1790537	C16ORF75	NA	0.828745	-0.271	0.033244	0.961051	-0.0573144	0.662521	0.808737	-0.306258	0.0644577	0.962249	-0.0555179	0.596242	0.809744	-0.304461	0.01623
ILMN_1759411	C16ORF79	NA	1.19499	0.257	0.120425	0.836325	-0.257864	0.662521	0.7578	-0.400112	0.5791	1.04322	0.0610452	0.479929	0.945269	-0.0812027	0.711531
ILMN_2112599	C16ORF80	NA	1.1487	0.2	0.202745	0.869837	-0.201183	0.19043	0.955192	-0.0661375	0.853307	0.916857	-0.125232	0.479929	1.00683	0.00981436	1
ILMN_1697800	C16ORF86	NA	0.911933	-0.133	0.299808	0.823028	-0.280987	0.245278	0.781988	-0.354782	0.175244	1.07532	0.104769	0.411314	1.0217	0.0309731	0.867632
ILMN_1690911	C16ORF87	NA	0.877822	-0.188	0.388624	1.01248	0.0178984	1	1.19358	0.255293	0.853307	0.88309	-0.179367	0.929637	1.04104	0.0580268	0.5791
ILMN_3246732	C16ORF88	NA	1.12896	0.175	0.265749	1.2912	0.368709	0.662521	0.868287	-0.203756	0.5791	0.841409	-0.24912	0.111961	0.56582	-0.821585	0.0419616
ILMN_1676222	C16ORF89	NA	1.19582	0.258	0.045415
ILMN_1759325	C16ORF91	NA	1.24747	0.319	0.005566	1.02908	0.0413589	1	0.933711	-0.0989524	0.459543	1.02063	0.0294667	0.791082	0.926046	-0.110845	1
ILMN_2179726	C16ORF93	NA	0.709562	-0.495	1.3e-05	0.811075	-0.302093	0.662521	0.783781	-0.351477	0.267257	0.992872	-0.0103207	0.536499	0.959461	-0.0597041	0.5791
ILMN_3237452	C17orf100	388327				1.08509	0.11781	0.382733	0.959937	-0.0589877	1	1.25511	0.32781	0.0272754	1.11035	0.151012	0.267257
ILMN_2388539	C17ORF101	NA	0.792784	-0.335	0.011103	0.818953	-0.288147	0.0808556	0.744573	-0.425514	0.0644577	0.783239	-0.352476	0.111961	0.712827	-0.488376	0.0960923
ILMN_3239959	C17ORF106	NA	1.02954	0.042	0.821494	0.866479	-0.206764	0.662521	0.7771	-0.363829	0.195562	0.932468	-0.100874	0.658843	0.836282	-0.257939	0.267257
ILMN_2099487	C17orf108	NA				0.850159	-0.234194	0.662521	0.951058	-0.072395	0.711531	1.11633	0.158766	0.723932	1.24882	0.320566	0.711531
ILMN_1654013	C17ORF28	NA	0.948684	-0.076	0.592821	0.774012	-0.369573	0.0808556	0.723693	-0.46655	0.01623	0.958757	-0.0607634	0.426777	0.896428	-0.157741	0.0419616
ILMN_1727078	C17ORF37	NA	0.993093	-0.01	0.968305	1.06263	0.0876447	0.382733	1.09321	0.128564	0.355226	0.990758	-0.0133948	0.536499	1.01926	0.0275248	0.5791
ILMN_1783645	C17ORF38	NA	0.961261	-0.057	0.784997	1.24295	0.313765	0.77283	0.926451	-0.110214	0.361935	0.827216	-0.273664	0.255623	0.616579	-0.697643	0.175244
ILMN_2113016	C17ORF39	NA	1.07475	0.104	0.472334	1.26438	0.338436	1	1.09641	0.132783	0.711531	0.93472	-0.0973933	0.250998	0.75683	-0.40196	0.261572
ILMN_1732374	C17ORF41	NA	0.880259	-0.184	0.160863	0.787293	-0.345027	0.382733	0.721152	-0.471624	0.459543	1.13554	0.183384	0.148915	1.02106	0.0300699	0.540291
ILMN_3307733	C17ORF42	NA	1.17121	0.228	0.108886	1.12164	0.165611	0.382733	0.86893	-0.202687	0.711531	0.921389	-0.118118	0.426777	0.713796	-0.486416	0.0419616
ILMN_1681252	C17orf44	NA				0.667558	-0.583036	0.382733	1.69758	0.76348	0.5791	0.927891	-0.107972	0.791082	2.3596	1.23854	0.0265003
ILMN_1719224	C17orf45	NA				0.773448	-0.370624	0.19043	0.807096	-0.309187	0.0644577	0.912819	-0.131599	0.479929	0.952531	-0.0701617	0.5791
ILMN_1670707	C17ORF46	NA	0.986916	-0.019	0.93514				1.58253	0.662232	1
ILMN_2075221	C17ORF47	NA	1.05922	0.083	0.653332	0.71811	-0.477722	0.662521	0.601919	-0.732359	0.195562	1.34227	0.424677	0.723932	1.12509	0.17004	0.853307
ILMN_1702526	C17ORF48	NA	1.30949	0.389	0.007512	1.60175	0.679645	0.662521	2.11314	1.07939	0.139087	0.985517	-0.0210477	0.596242	1.30016	0.378694	0.267257
ILMN_1763688	C17ORF49	NA	0.861546	-0.215	0.132085	0.882011	-0.181131	0.382733	1.07125	0.0992975	0.853307	0.89589	-0.158606	0.536499	1.08811	0.121822	1
ILMN_1757693	C17ORF51	NA	1.15109	0.203	0.301563	1.21965	0.286465	0.0808556	0.97702	-0.0335394	0.5791	0.912746	-0.131714	0.0933977	0.731171	-0.451719	0.01623
ILMN_1776490	C17ORF53	NA	1.05555	0.078	0.667498	0.857503	-0.221787	0.382733	0.774899	-0.36792	0.195562	1.11634	0.158783	0.859819	1.00881	0.0126498	0.711531
ILMN_1721055	C17ORF54	NA	1.07624	0.106	0.572659
ILMN_1656069	C17orf55	NA										0.735526	-0.443151	0.371093	0.77376	-0.370042	1
ILMN_2056687	C17ORF56	NA	1.15429	0.207	0.08923	0.926541	-0.110074	0.662521	1.03226	0.0458117	0.853307	1.03606	0.0511071	0.791082	1.15428	0.206993	0.459543
ILMN_1700515	C17ORF58	NA	1.12584	0.171	0.144757	1.06222	0.0870854	0.540291	1.2232	0.290662	0.355226	0.980074	-0.0290378	0.658843	1.06236	0.0872765	0.5791
ILMN_2225746	C17ORF59	NA	1.22179	0.289	0.060263	1.11695	0.159569	1	0.893216	-0.162919	0.494125	1.26001	0.333436	0.52445	1.00762	0.0109481	0.759463
ILMN_2201533	C17ORF61	NA	0.96393	-0.053	0.845953	0.822476	-0.281954	0.382733	0.796833	-0.327651	0.0419616	0.948364	-0.0764876	0.479929	0.918796	-0.122184	0.0419616
ILMN_1750401	C17ORF62	NA	0.83047	-0.268	0.05096	0.794766	-0.331397	0.19043	0.812921	-0.298812	0.0644577	0.942511	-0.0854181	0.723932	0.964041	-0.0528329	0.5791
ILMN_1812441	C17ORF63	NA	0.997923	-0.003	0.990092	0.848942	-0.236263	0.662521	0.807823	-0.307889	0.459543	0.856361	-0.22371	0.111961	0.814883	-0.295335	0.0960923
ILMN_1717579	C17ORF64	NA	1.14235	0.192	0.129396							0.805094	-0.312771	1
ILMN_1676731	C17orf65	NA				0.965694	-0.0503618	1	0.826087	-0.275634	0.195562	0.901754	-0.149194	0.723932	0.77139	-0.374467	0.267257
ILMN_1707292	C17ORF67	NA	1.02883	0.041	0.885934	0.924057	-0.113946	1	0.910545	-0.135198	1	0.933707	-0.0989579	1	0.920053	-0.12021	0.382733
ILMN_1755711	C17ORF68	NA	1.13446	0.182	0.095704	0.665428	-0.587646	0.0808556	0.793789	-0.333173	0.358326	0.826582	-0.27477	0.371093	0.964737	-0.051792	0.494125
ILMN_1743621	C17orf69	NA				1.22109	0.288165	0.0808556	1.15428	0.206999	0.195562	0.984343	-0.0227677	0.723932	0.930492	-0.103934	0.355226
ILMN_1711823	C17ORF70	NA	0.690637	-0.534	9.6e-05	0.927891	-0.107973	0.662521	0.748036	-0.418819	0.195562	0.967226	-0.0480753	0.596242	0.779747	-0.358922	0.0419616
ILMN_1807533	C17ORF71	NA	1.23114	0.3	0.012629	1.07216	0.100515	1	1.05605	0.0786833	1	1.02229	0.0318016	0.596242	1.00693	0.00996973	0.5791
ILMN_1710619	C17ORF73	NA	0.878431	-0.187	0.234449
ILMN_1810107	C17ORF74	NA	0.913198	-0.131	0.376804	0.580492	-0.784651	1	0.670414	-0.576876	0.382733	0.803886	-0.314937	0.0740352	0.928412	-0.107162	1
ILMN_2221784	C17ORF76	NA	0.916369	-0.126	0.487147	0.85063	-0.233396	0.245278							1.14232	0.191962	0.540291
ILMN_1806330	C17ORF78	NA	0.908778	-0.138	0.466452	0.802057	-0.318223	0.386476	0.951932	-0.0710698	0.846451	0.933746	-0.0988981	0.540291	1.10823	0.148255	0.859684
ILMN_1752947	C17ORF79	NA	1.17854	0.237	0.314812	0.865942	-0.207657	0.19043	0.879352	-0.185488	0.355226	0.973689	-0.038467	0.596242	0.988767	-0.0162977	0.5791
ILMN_1762071	C17ORF80	NA	1.0367	0.052	0.785907	1.05173	0.0727587	0.382733	1.25495	0.327635	0.267257	0.847339	-0.238989	0.596242	1.01107	0.0158869	0.711531
ILMN_1672554	C17ORF81	NA	1.16231	0.217	0.080827	0.731121	-0.451817	0.0808556	0.782093	-0.354589	0.01623	0.973395	-0.0389029	0.13332	0.839302	-0.252737	0.139087
ILMN_1783682	C17ORF82	NA	0.901875	-0.149	0.359954	1.2679	0.342436	1	1.01015	0.0145635	1	0.887098	-0.172835	0.371093	0.70676	-0.500707	0.371093
ILMN_2221076	C17ORF85	NA	1.47121	0.557	1.3e-05	0.952002	-0.0709637	1	0.989494	-0.0152377	0.711531	0.95376	-0.0683022	0.536499	0.991321	-0.0125761	1
ILMN_3307757	C17ORF87	NA	0.957935	-0.062	0.693239				1.17272	0.229854	0.382733	0.687771	-0.539999	0.111612
ILMN_3263062	C17orf88	NA				0.876972	-0.189397	0.19043	0.839337	-0.252677	0.139087	1.02776	0.0395086	0.596242	0.983658	-0.0237715	0.853307
ILMN_3245824	C17ORF89	NA	1.26138	0.335	0.026486	0.921273	-0.1183	1	0.853194	-0.229054	0.0960923	0.948719	-0.0759467	1	0.878612	-0.186701	0.139087
ILMN_1805131	C17ORF90	NA	1.19416	0.256	0.043252	1.02565	0.0365397	1	0.853162	-0.229108	0.0419616	1.12046	0.164094	0.536499	0.815231	-0.294719	0.0419616
ILMN_2390310	C17orf91	NA				1.36875	0.452862	0.19043	1.37495	0.459379	0.0960923	1.1088	0.148996	0.377225	1.11382	0.155513	0.267257
ILMN_3236709	C17orf93	NA				0.697894	-0.518921	1	0.968298	-0.0464769	1	0.642803	-0.637551	0.558185	0.891863	-0.165107	1
ILMN_2382724	C17ORF95	NA	1.14949	0.201	0.18699	1.18008	0.238891	0.19043	0.858957	-0.219342	0.01623	0.895997	-0.158434	0.0933977	0.800184	-0.321597	0.0419616
ILMN_3247139	C17ORF96	NA	1.01607	0.023	0.901037	0.903962	-0.145666	0.382733	0.846011	-0.241252	0.5791	1.07236	0.100792	0.289315	1.00361	0.00520592	0.853307
ILMN_1707137	C17ORF97	NA	0.90689	-0.141	0.497401	1.17676	0.234815	0.662521	0.887756	-0.171766	0.195562	0.88044	-0.183704	0.0933977	0.771387	-0.374474	0.0644577
ILMN_3247988	C17ORF98	NA	1.06142	0.086	0.65533	0.894515	-0.160823	1	0.999324	-0.000975311	0.853307	0.876109	-0.190818	0.596242	0.978762	-0.0309705	0.853307
ILMN_1671693	C18ORF10	NA	0.863938	-0.211	0.105081	0.953362	-0.0689041	0.382733	0.847217	-0.239197	0.0419616	0.843756	-0.245101	0.289315	0.809056	-0.305688	0.01623
ILMN_1705656	C18ORF16	NA	0.93045	-0.104	0.502651
ILMN_1658110	C18ORF19	NA	1.27456	0.35	0.004145	1.17022	0.226779	0.662521	1.25262	0.324951	0.459543	0.835676	-0.258984	0.250998	0.894521	-0.160812	0.267257
ILMN_1722133	C18orf2	NA
ILMN_1805998	C18ORF21	NA	1.00208	0.003	0.991728	1.04707	0.0663635	1	0.977577	-0.0327176	1	0.998521	-0.00213498	0.596242	0.932247	-0.101216	1
ILMN_1736130	C18ORF22	NA	0.903753	-0.146	0.329258	0.805433	-0.312164	0.0808556	0.706605	-0.501024	0.01623	0.888098	-0.171209	0.331387	0.779127	-0.360069	0.355226
ILMN_1801822	C18ORF25	NA	1.264	0.338	0.058076	1.09112	0.125813	1	0.703881	-0.506596	0.0960923	1.06969	0.0971922	0.426777	0.690055	-0.535217	0.0644577
ILMN_1746670	C18orf26	NA										0.580127	-0.785559	1	0.860027	-0.217546	1
ILMN_2196588	C18ORF32	NA	0.844401	-0.244	0.049885	0.905632	-0.143004	1	0.730016	-0.454001	0.5791	0.929928	-0.104809	0.377225	0.749601	-0.415806	0.267257
ILMN_1690442	C18ORF45	NA	0.952638	-0.07	0.760362	0.846752	-0.239989	0.19043	0.698743	-0.517166	0.0265003	0.934072	-0.0983946	0.658843	0.7708	-0.375571	0.355226
ILMN_2173500	C18ORF51	NA	0.961928	-0.056	0.732546
ILMN_2169089	C18ORF54	NA	1.08222	0.114	0.538158	1.19719	0.259656	0.662521	0.918245	-0.123049	0.853307	0.866658	-0.206465	0.250998	0.664726	-0.589169	0.0960923
ILMN_1748916	C18ORF55	NA	1.20581	0.27	0.031727	0.88505	-0.17617	0.662521	0.660713	-0.597904	0.0644577	0.967409	-0.047802	0.426777	0.819387	-0.287384	0.01623
ILMN_1796074	C18ORF56	NA	1.36509	0.449	0.002069	1.01589	0.022743	0.662521	0.738799	-0.436746	0.195562	1.20265	0.266211	0.658843	0.874617	-0.193277	0.459543
ILMN_1784905	C18ORF58	NA	0.963262	-0.054	0.774512
ILMN_1719097	C18ORF8	NA	1.37078	0.455	0.000492	0.954175	-0.0676735	0.662521	0.911082	-0.134348	0.195562	0.934164	-0.0982528	0.479929	0.891974	-0.164927	0.195562
ILMN_1787844	C19ORF10	NA	0.698339	-0.518	1.3e-05	0.80175	-0.318776	0.382733	0.952809	-0.0697411	1	0.75759	-0.40051	0.00807149	0.900329	-0.151475	0.195562
ILMN_1703695	C19ORF12	NA	0.940826	-0.088	0.581433	0.82282	-0.281351	0.19043	0.721082	-0.471764	0.01623	0.56777	-0.816622	0.111612	0.757319	-0.401028	0.139087
ILMN_1800031	C19ORF15	NA	0.938872	-0.091	0.664291
ILMN_1785933	C19ORF18	NA	1.31403	0.394	0.001683
ILMN_1798728	C19ORF2	NA	1.19582	0.258	0.09745	0.882613	-0.180148	0.382733	0.871255	-0.198833	0.0644577	0.908587	-0.138303	0.185326	0.930533	-0.103871	0.195562
ILMN_2199298	C19ORF20	NA	1.21419	0.28	0.031095
ILMN_1683905	C19ORF21	NA	0.989657	-0.015	0.942335	0.986453	-0.0196771	1	0.942724	-0.085093	0.459543	1.13999	0.189017	0.479929	1.08945	0.123601	1
ILMN_1808202	C19ORF22	NA	0.93045	-0.104	0.664358	0.869785	-0.201269	0.0808556	0.744207	-0.426224	0.0419616	0.898957	-0.153677	0.426777	0.769167	-0.378632	0.0644577
ILMN_1657148	C19ORF23	NA	1.04247	0.06	0.708285
ILMN_1678052	C19ORF24	NA	0.938221	-0.092	0.636502	0.753172	-0.408948	0.19043	0.771227	-0.374772	0.355226	1.09634	0.132701	0.929637	1.12263	0.166877	1
ILMN_1655225	C19ORF25	NA	1.04102	0.058	0.745929	0.621304	-0.686628	0.0808556	0.6254	-0.677149	0.0644577	1.03814	0.0540009	0.929637	1.04498	0.0634795	0.853307
ILMN_1780504	C19ORF26	NA	1.20748	0.272	0.054715
ILMN_2408796	C19ORF28	NA	1.09657	0.133	0.639714	0.675747	-0.565444	0.19043	0.656119	-0.607971	0.139087	0.968113	-0.0467524	0.525358	0.88218	-0.180854	0.139087
ILMN_2350421	C19ORF29	NA	0.940174	-0.089	0.516692	0.747508	-0.419838	0.0808556	0.816213	-0.292983	0.139087	0.856759	-0.223039	0.289315	0.914856	-0.128383	0.5791
ILMN_3187980	C19orf29OS	NA				1.20747	0.271992	0.540291	0.808218	-0.307183	0.382733	0.820131	-0.286074	0.0740352	0.548952	-0.86525	0.0813611
ILMN_1730818	C19orf30	NA				0.87588	-0.191194	0.662521	1.01143	0.0163994	0.711531	0.823478	-0.280197	0.331387	0.95092	-0.0726037	0.459543
ILMN_2233279	C19orf31	NA				0.951812	-0.0712522	0.0808556	0.943927	-0.0832524	0.195562	0.84895	-0.236248	0.0933977	0.841918	-0.248249	0.139087
ILMN_1717793	C19orf33	64073				0.847395	-0.238894	0.0808556	0.75969	-0.396518	0.0265003	0.866387	-0.206917	0.0773886	0.776716	-0.364541	0.01623
ILMN_1788337	C19ORF36	NA	0.961261	-0.057	0.732546
ILMN_3240538	C19ORF38	NA	1.12818	0.174	0.323109							1.37503	0.459458	0.371093	0.952817	-0.0697285	0.550985
ILMN_1707943	C19orf39	NA				0.787447	-0.344745	0.77283	0.681145	-0.553965	0.148915	1.20619	0.270454	0.459543	1.04336	0.061233	1
ILMN_1730945	C19ORF4	NA	1.17283	0.23	0.157215	0.984673	-0.0222831	0.540291	1.04311	0.060885	0.487453	1.05394	0.0757892	0.540291	1.11648	0.158957	0.558185
ILMN_2173891	C19ORF40	NA	1.01396	0.02	0.932356	0.892287	-0.164421	0.382733	0.834005	-0.261872	0.711531	1.3029	0.381721	0.859819	1.21779	0.28427	0.195562
ILMN_1694759	C19ORF42	NA	1.09581	0.132	0.475242	0.830125	-0.2686	0.19043	0.741432	-0.431614	0.01623	0.852149	-0.230822	0.479929	0.761103	-0.393836	0.0419616
ILMN_3251733	C19ORF43	NA	1.27191	0.347	0.012381	0.761064	-0.393911	0.19043	0.827335	-0.273457	0.0960923	0.946513	-0.0793062	0.596242	0.976327	-0.0345639	0.355226
ILMN_1801572	C19ORF44	NA	1.17283	0.23	0.074343	0.778385	-0.361445	0.382733	1.12854	0.174453	0.711531	0.718096	-0.477751	0.536499	1.04113	0.0581465	0.355226
ILMN_1801697	C19orf46	NA				0.888643	-0.170324	1	0.864451	-0.210144	0.0960923	0.945997	-0.0800926	0.289315	0.920243	-0.119913	0.0419616
ILMN_1735608	C19ORF47	NA	0.971307	-0.042	0.825724	1.18655	0.246772	0.77283	0.745741	-0.423254	0.139087	0.921334	-0.118204	0.750824	0.579054	-0.788229	0.305507
ILMN_1759184	C19ORF48	NA	1.40444	0.49	0.000127	0.790821	-0.338577	0.19043	0.90519	-0.143707	0.0960923	0.90265	-0.147761	0.723932	0.866592	-0.206575	0.355226
ILMN_1790951	C19ORF50	NA	0.940826	-0.088	0.646565	0.837359	-0.256082	0.662521	0.804999	-0.312941	1	0.974816	-0.036798	0.536499	0.937144	-0.093657	0.711531
ILMN_1772074	C19orf51	NA				0.656517	-0.607096	0.0808556	0.621159	-0.686965	0.0419616	0.876385	-0.190363	0.111961	0.829187	-0.270231	0.0265003
ILMN_1726181	C19ORF52	NA	1.21083	0.276	0.020257	0.906554	-0.141536	0.662521	0.845818	-0.24158	0.139087	1.01979	0.0282677	0.596242	0.951465	-0.0717771	0.267257
ILMN_1671374	C19ORF53	NA	1.0203	0.029	0.866142	0.974613	-0.0370991	0.382733	0.890007	-0.16811	0.01623	0.93221	-0.101273	0.596242	0.851286	-0.232284	0.195562
ILMN_1729546	C19ORF54	NA	1.33978	0.422	0.002793	0.912947	-0.131397	0.19043	0.921453	-0.118017	0.5791	0.94986	-0.0742128	0.250998	0.95871	-0.0608332	0.5791
ILMN_1757914	C19ORF56	NA	1.13918	0.188	0.181428	0.816323	-0.292788	0.382733	0.79298	-0.334644	0.267257	0.921683	-0.117657	0.289315	0.895327	-0.159513	0.355226
ILMN_1682339	C19ORF57	NA	1.05775	0.081	0.612274
ILMN_1762439	C19ORF6	NA	1.17691	0.235	0.097005	0.735369	-0.44346	0.382733	0.849407	-0.235471	0.0419616	0.743153	-0.428269	0.0773886	0.829702	-0.269334	0.0960923
ILMN_3268564	C19ORF60	NA	1.08673	0.12	0.415425	0.802559	-0.31732	0.19043	0.824729	-0.278008	0.0960923	0.858711	-0.219755	0.13332	0.928169	-0.10754	0.267257
ILMN_1737005	C19ORF61	NA	1.31677	0.397	0.000885	0.70833	-0.497507	0.0808556	0.645857	-0.630714	0.195562	1.01524	0.0218244	0.596242	0.925701	-0.111382	0.853307
ILMN_2396813	C19ORF62	NA	1.04754	0.067	0.65062	0.906379	-0.141814	0.0808556	0.813893	-0.297089	0.0419616	0.989347	-0.0154519	0.216373	0.850246	-0.234048	0.267257
ILMN_1786707	C19ORF63	NA	0.909408	-0.137	0.27136	0.74993	-0.415172	0.0808556	0.717802	-0.478342	0.0644577	1.05556	0.0780061	0.859819	1.01034	0.0148361	0.853307
ILMN_3253728	C19ORF64	NA	1.09278	0.128	0.455729	0.453236	-1.14167	0.0808556	0.733082	-0.447954	0.139087	0.899039	-0.153544	0.665006	1.45414	0.540168	0.125786
ILMN_1750400	C19ORF66	NA	0.686342	-0.543	0.109786
ILMN_1662187	C19ORF67	NA	1.00556	0.008	0.977835
ILMN_1765684	C19ORF70	NA	0.898132	-0.155	0.227943	0.892556	-0.163986	0.0808556	0.79004	-0.340002	0.01623	0.965598	-0.0505054	0.479929	0.854693	-0.226521	0.0644577
ILMN_3242508	C19ORF71	NA	1.08673	0.12	0.542205	0.832974	-0.263657	0.698535	0.604087	-0.72717	0.0501862	0.904175	-0.145326	0.531667	0.655724	-0.60884	0.194851
ILMN_1699309	C19ORF75	NA	0.915099	-0.128	0.387621
ILMN_1762330	C1D	10438				0.676533	-0.563767	0.540291	0.682818	-0.550426	0.802587	1.10106	0.138898	0.846451	1.11129	0.152239	0.695299
ILMN_1662578	C1GALT1	56913	0.989657	-0.015	0.956123	1.06427	0.0898645	0.662521	0.827311	-0.273499	0.711531	0.897445	-0.156105	0.111961	0.697629	-0.519468	0.0265003
ILMN_1751234	C1GALT1C1	29071	0.697372	-0.52	0.000156	0.928558	-0.106936	0.382733	0.898533	-0.154356	0.0960923	0.969335	-0.0449323	0.658843	0.822965	-0.281098	0.01623
ILMN_1756811	C1ORF103	NA	1.20916	0.274	0.014697				1.45072	0.53677	0.540291	0.55866	-0.839957	0.148915
ILMN_2114185	C1ORF104	NA	1.19003	0.251	0.039649	1.15412	0.20679	0.662521	1.1095	0.149916	0.355226	1.39864	0.484023	0.0933375	0.809262	-0.305322	0.5791
ILMN_1714222	C1orf105	92346										1.10652	0.146028	0.698535
ILMN_1713952	C1orf106	NA				0.853895	-0.22787	0.19043	0.776892	-0.364214	0.01623	0.909612	-0.136677	0.289315	0.827585	-0.273021	0.139087
ILMN_2089656	C1orf107	NA				1.03073	0.043666	0.662521	0.97696	-0.0336282	0.853307	0.931292	-0.102695	0.859819	0.88271	-0.179989	0.853307
ILMN_2077886	C1ORF109	NA	1.30495	0.384	0.010452	1.17323	0.230489	0.0808556	1.1781	0.236463	0.267257	1.1717	0.228597	0.859819	1.17656	0.234571	0.853307
ILMN_1727540	C1ORF112	NA	1.04174	0.059	0.839191	0.891622	-0.165495	0.662521	0.836858	-0.256946	0.459543	0.957252	-0.0630288	0.929637	0.898457	-0.154479	0.711531
ILMN_1789140	C1ORF113	NA	1.06069	0.085	0.699966
ILMN_1777963	C1ORF114	NA	0.99585	-0.006	0.982632
ILMN_1674817	C1ORF115	NA	0.932387	-0.101	0.662456	0.924628	-0.113055	0.382733	0.942059	-0.0861103	0.355226	0.924987	-0.112496	0.289315	0.942424	-0.0855512	0.853307
ILMN_1706483	C1ORF116	NA	0.943438	-0.084	0.639636							1.04024	0.0569157	1
ILMN_1755835	C1orf120	NA							0.752509	-0.410219	0.148915	1.24958	0.321446	0.332922
ILMN_1786273	C1ORF122	NA	0.761544	-0.393	0.003251	0.852808	-0.229707	0.0808556	0.784339	-0.35045	0.139087	0.991483	-0.0123396	0.596242	0.911881	-0.133083	0.459543
ILMN_2082130	C1ORF123	NA	0.635957	-0.653	3e-06	0.875069	-0.192531	0.382733	0.8308	-0.267427	0.0265003	0.969332	-0.044938	0.596242	0.920294	-0.119833	0.5791
ILMN_2371470	C1ORF124	NA	1.13524	0.183	0.164046	1.29032	0.367726	0.0808556	1.27664	0.352352	0.267257	0.894659	-0.16059	0.289315	0.74238	-0.42977	0.0960923
ILMN_1684246	C1ORF125	NA	0.989657	-0.015	0.951154										0.691811	-0.53155	1
ILMN_1691441	C1ORF126	NA	1.01326	0.019	0.937468
ILMN_1784207	C1ORF128	NA	1.1487	0.2	0.154542	0.943406	-0.0840493	0.382733	0.904676	-0.144527	0.459543	1.01651	0.0236201	1	0.974776	-0.0368578	0.853307
ILMN_3246014	C1ORF130	NA	1.08147	0.113	0.5819	1.06841	0.0954638	1	0.90925	-0.137251	0.5791	0.83068	-0.267635	0.929637	0.706935	-0.50035	0.853307
ILMN_1805474	C1ORF131	NA	1.07103	0.099	0.564701	1.00665	0.00955884	1	1.08231	0.114109	0.853307	0.960888	-0.0575601	0.791082	1.03311	0.0469896	0.711531
ILMN_1747531	C1ORF132	NA	1.18263	0.242	0.038691
ILMN_3241665	C1ORF133	NA	1.04391	0.062	0.750311	1.002	0.00288315	1	0.806809	-0.3097	0.267257	1.08057	0.111797	0.426777	0.870076	-0.200787	0.459543
ILMN_1787280	C1ORF135	NA	0.928517	-0.107	0.503259	1.02957	0.0420427	0.662521	0.743093	-0.428385	0.0960923	0.983667	-0.0237585	0.791082	0.709962	-0.494186	0.0644577
ILMN_1723256	C1orf137	388667				0.71047	-0.493155	1	0.757872	-0.399973	1	1.28422	0.360897	0.341349	1.36991	0.454078	0.175244
ILMN_1705904	C1orf138	NA
ILMN_1684186	C1ORF141	NA	0.927874	-0.108	0.624173
ILMN_1707503	C1ORF144	NA	0.873573	-0.195	0.080632	0.882668	-0.180057	1	0.855634	-0.224934	0.267257	0.936076	-0.095303	0.929637	0.907406	-0.14018	0.195562
ILMN_2076940	C1orf149	NA				1.07843	0.108933	0.662521	1.58271	0.662399	0.139087	0.786045	-0.347316	0.289315	1.15361	0.20615	0.355226
ILMN_1657860	C1ORF151	NA	0.925946	-0.111	0.564266	1.20845	0.273153	0.662521	0.875557	-0.191728	0.355226	0.794813	-0.331313	0.0719442	0.769267	-0.378444	0.0682475
ILMN_2387496	C1ORF152	NA	0.976032	-0.035	0.905405	0.503	-0.991368	1	0.619639	-0.6905	0.288844
ILMN_1734915	C1ORF156	NA	1.15349	0.206	0.300949	0.783455	-0.352078	0.662521	0.852152	-0.230817	0.695299	1.29025	0.36765	0.135833	1.09674	0.133221	0.355226
ILMN_1809448	C1ORF157	NA	1.06733	0.094	0.622611
ILMN_1733298	C1orf158	93190
ILMN_1672811	C1ORF159	NA	1.02527	0.036	0.839269	1.07329	0.102036	1	0.853095	-0.229221	0.474959	0.937295	-0.0934243	0.713191	0.745003	-0.424682	0.609834
ILMN_1754894	C1ORF162	NA	1.06881	0.096	0.573812	0.901619	-0.14941	0.77283	1.35032	0.433304	0.609834	0.706532	-0.501173	0.563524	1.05815	0.0815415	0.896125
ILMN_1757415	C1ORF163	NA	1.17283	0.23	0.02517	0.942164	-0.0859501	0.382733	1.50431	0.589101	0.355226	1.2093	0.274173	0.859819	1.93083	0.949224	0.267257
ILMN_1675055	C1ORF166	NA	1.17854	0.237	0.073191	0.945597	-0.0807021	0.382733	1.01273	0.0182489	0.853307	0.902297	-0.148325	0.289315	0.966356	-0.049374	0.711531
ILMN_1701101	C1ORF167	NA	0.972655	-0.04	0.820535
ILMN_1761999	C1orf168	NA				1.18969	0.250586	1	0.799426	-0.322964	0.0524795	1.25087	0.322933	0.430897	0.840537	-0.250617	0.609834
ILMN_1784186	C1ORF170	NA	1.11419	0.156	0.262738	1.02298	0.0327769	0.371093	0.734734	-0.444707	0.233038	0.941134	-0.0875282	0.816961	0.655589	-0.609137	0.105193
ILMN_1676322	C1ORF172	NA	0.98214	-0.026	0.896144	0.756606	-0.402386	0.0808556	0.771411	-0.374429	0.0419616	0.911997	-0.1329	0.331387	0.929842	-0.104943	0.355226
ILMN_3236244	C1ORF174	NA	1.0629	0.088	0.559037	0.960507	-0.0581325	0.662521	0.96261	-0.0549771	0.853307	0.919179	-0.121582	0.596242	0.921192	-0.118427	0.711531
ILMN_1792551	C1ORF175	NA	0.986233	-0.02	0.930022
ILMN_1777437	C1ORF177	NA	1.08298	0.115	0.572936	1.0061	0.00877727	1	0.922391	-0.116549	0.561276	1.27234	0.347479	0.385418	1.16647	0.222153	0.648503
ILMN_1806963	C1ORF182	NA	1.06142	0.086	0.647656	1.13841	0.187017	1	1.09452	0.130299	1	1.07903	0.10973	0.943057	1.03743	0.0530124	0.802587
ILMN_1797301	C1ORF183	NA	0.925304	-0.112	0.489342
ILMN_1708393	C1orf185	284546
ILMN_1669123	C1ORF187	NA	1.02385	0.034	0.874561							1.00701	0.0100802	0.540291
ILMN_1789058	C1orf188	NA				0.958053	-0.0618227	0.662521	0.980817	-0.0279437	0.459543	0.886472	-0.173852	0.672	0.907536	-0.139973	0.819708
ILMN_1790713	C1ORF189	NA	0.981459	-0.027	0.905405	0.776027	-0.365822	0.19043	1.04531	0.0639321	0.711531	0.955716	-0.0653467	0.426777	1.28735	0.364407	0.0644577
ILMN_1734486	C1ORF19	NA	0.931095	-0.103	0.555333	0.971042	-0.0423939	1	0.869424	-0.201868	0.139087	0.940217	-0.0889347	0.658843	0.841825	-0.248408	0.139087
ILMN_1742738	C1ORF190	NA	0.833931	-0.262	0.03909	1.08815	0.121878	0.77283	0.885179	-0.175958	0.148915	0.994414	-0.00808138	0.859684	0.808927	-0.305918	0.859684
ILMN_1691299	C1orf192	NA				0.515922	-0.954775	0.540291	0.63556	-0.653901	1	0.521263	-0.939916	0.111612	0.642139	-0.639042	0.816961
ILMN_3251643	C1ORF194	NA	0.975356	-0.036	0.850878	0.841569	-0.248847	1	0.971094	-0.0423169	0.853307	0.823817	-0.279605	0.0520588	0.95061	-0.0730743	0.267257
ILMN_1657683	C1ORF198	NA	0.762072	-0.392	0.104581	0.822467	-0.28197	0.19043	0.840158	-0.251267	0.267257	0.739694	-0.434999	0.111961	0.755605	-0.404295	0.267257
ILMN_1703119	C1ORF200	NA	0.82188	-0.283	0.011945	0.900727	-0.150838	0.540291	0.809176	-0.305475	0.77283	0.851784	-0.23144	1	0.765207	-0.386078	1
ILMN_2187071	C1orf201	NA				0.906913	-0.140964	1	1.03794	0.0537177	0.609834	1.06919	0.0965159	0.961627	1.22366	0.291197	0.853307
ILMN_3256801	C1orf203	NA				0.944533	-0.0823268	0.382733	0.779511	-0.359358	0.0419616	0.71945	-0.475034	0.360644	0.593753	-0.752065	0.0189035
ILMN_3244105	C1orf204	NA				0.649146	-0.623385	0.245278	0.598097	-0.741548	0.0570399	1.12766	0.173337	0.776814	1.03899	0.0551749	0.816961
ILMN_1797735	C1ORF21	NA	1.07773	0.108	0.446091
ILMN_1670064	C1orf210	149466				0.739907	-0.434585	0.662521	0.893093	-0.163117	0.459543	0.854617	-0.22665	0.0750492	0.795362	-0.330317	0.0960923
ILMN_1693226	C1orf212	NA				0.791108	-0.338054	0.662521	0.788073	-0.3436	0.139087	0.930808	-0.103444	0.377225	0.927237	-0.10899	0.267257
ILMN_1705419	C1ORF213	NA	1.02669	0.038	0.806852							0.929108	-0.106082	1	0.798415	-0.32479	1
ILMN_1708714	C1ORF215	NA	0.926588	-0.11	0.489283							0.949909	-0.0741383	0.698535
ILMN_1659975	C1orf216	127703				1.03602	0.05105	0.382733	0.997555	-0.00353142	1	0.839419	-0.252537	0.289315	0.808255	-0.307118	0.267257
ILMN_1789436	C1ORF218	NA	0.877822	-0.188	0.140051	1.19523	0.257285	0.382733	0.956207	-0.0646052	0.5791	0.978484	-0.0313794	0.536499	0.782808	-0.35327	0.0265003
ILMN_1705677	C1orf220	400798
ILMN_1749317	C1ORF222	NA	0.850864	-0.233	0.053928	0.665596	-0.587282	0.382733	0.75378	-0.407785	0.254451	0.90279	-0.147538	0.283977	1.0224	0.0319583	0.897279
ILMN_1681732	C1ORF226	NA	0.871154	-0.199	0.149703							0.904451	-0.144886	1
ILMN_1666825	C1orf229	388759				1.12533	0.170348	1	1.19519	0.257243	0.371093	0.858915	-0.219413	0.371093	0.912238	-0.132518	1
ILMN_1667966	C1ORF24	NA	0.704172	-0.506	0.009417	0.876937	-0.189456	0.662521	0.851472	-0.231969	0.139087	0.696659	-0.521474	0.00356863	0.67643	-0.563988	0.01623
ILMN_1665300	C1ORF25	NA	1.19334	0.255	0.059252	1.07471	0.103943	1	0.833565	-0.262634	0.267257	0.793941	-0.332897	0.185326	0.67743	-0.561857	0.195562
ILMN_1692834	C1ORF26	NA	1.1235	0.168	0.245053	0.697764	-0.51919	0.245278	1.09258	0.127735	0.660549	0.643015	-0.637075	0.0128413	1.00685	0.00984977	0.896125
ILMN_1704222	C1orf27	NA				1.11022	0.150843	0.77283	0.787445	-0.344749	1	1.06655	0.0929569	0.929637	0.756476	-0.402635	0.125506
ILMN_1681741	C1ORF31	NA	1.08073	0.112	0.463861	0.829107	-0.270371	0.382733	0.777032	-0.363954	0.195562	1.13671	0.184869	0.596242	1.06532	0.0912856	0.853307
ILMN_1790202	C1ORF35	NA	1.01255	0.018	0.920695	0.919075	-0.121745	0.662521	0.913373	-0.130723	0.0644577	0.907273	-0.140392	0.216373	0.901644	-0.14937	0.195562
ILMN_1735143	C1orf38	NA				1.48829	0.573655	0.540291	0.985537	-0.0210187	0.77283	0.895552	-0.159151	0.77283	0.593029	-0.753825	0.540291
ILMN_1681340	C1ORF41	NA	0.703684	-0.507	0.004337	1.15841	0.212151	0.382733	0.815982	-0.293391	0.0265003	1.0449	0.0633703	0.536499	0.736025	-0.442172	0.01623
ILMN_1729509	C1ORF43	NA	1.3435	0.426	0.003225	0.902133	-0.148588	0.19043	0.993715	-0.00909558	0.355226	0.883971	-0.177929	0.157704	0.93499	-0.0969767	0.5791
ILMN_1801941	C1ORF50	NA	0.873573	-0.195	0.108037	0.968072	-0.0468136	1	1.02433	0.0346859	1	0.93048	-0.103953	0.426777	0.984557	-0.0224533	1
ILMN_1793543	C1ORF51	NA	1.05409	0.076	0.725479	0.905191	-0.143706	1	1.85494	0.891369	0.267257	0.772102	-0.373136	0.658843	1.58221	0.661939	0.5791
ILMN_1742611	C1orf52	148423				1.04141	0.058543	0.662521	0.951638	-0.0715152	0.5791	1.06058	0.0848478	0.859819	0.969148	-0.0452105	0.711531
ILMN_1661595	C1ORF53	NA	1.09429	0.13	0.61486	1.04874	0.0686576	1	1.03955	0.0559526	0.459543	0.940638	-0.0882887	0.596242	0.932391	-0.100994	1
ILMN_1702231	C1ORF54	NA	0.467488	-1.097	2.2e-05	1.09652	0.132935	0.77283	0.711142	-0.49179	0.723674	1.16445	0.219652	0.929637	0.755198	-0.405073	0.195562
ILMN_1748291	C1orf55	NA				1.28422	0.360891	0.382733	1.33513	0.416984	0.195562	0.954961	-0.0664863	0.479929	0.992821	-0.0103941	1
ILMN_1780268	C1ORF56	NA	1.0274	0.039	0.840613	0.899999	-0.152004	0.382733	0.74192	-0.430664	0.195562	1.03303	0.0468799	0.929637	0.851584	-0.23178	0.5791
ILMN_1657446	C1ORF57	NA	1.09354	0.129	0.551699	0.999796	-0.000294654	0.662521	0.881114	-0.182599	0.0419616	0.879709	-0.184902	0.596242	0.775283	-0.367206	0.267257
ILMN_1654864	C1orf58	NA				0.681324	-0.553588	0.540291	1.32127	0.401927	0.561276	0.890257	-0.167706	0.531667	1.72645	0.787809	0.194851
ILMN_1682428	C1ORF59	NA	1.06216	0.087	0.501865
ILMN_1749915	C1ORF63	NA	0.877822	-0.188	0.315666	1.15118	0.203117	0.0808556	1.00835	0.0119999	0.5791	0.731749	-0.450579	0.331387	0.749954	-0.415126	0.195562
ILMN_2066088	C1ORF64	NA	1.02669	0.038	0.854704	0.790823	-0.338573	0.382733	0.505092	-0.985383	0.01623	1.02869	0.0408132	0.536499	0.657017	-0.605997	0.0644577
ILMN_1706413	C1ORF66	NA	1.23371	0.303	0.033331	0.801954	-0.318409	0.662521	0.902708	-0.147669	1	0.952654	-0.0699752	0.111961	1.07234	0.100765	0.711531
ILMN_1657144	C1ORF69	NA	1.12039	0.164	0.230919	1.20123	0.264508	0.662521	1.03436	0.0487404	0.853307	1.1166	0.159115	0.658843	0.961493	-0.0566523	0.711531
ILMN_1748257	C1ORF70	NA	0.970634	-0.043	0.797854
ILMN_1670263	C1ORF71	NA	1.37459	0.459	0.000266	1.04483	0.0632617	0.662521	0.868773	-0.202948	0.01623	0.86753	-0.205014	0.859819	0.721352	-0.471224	0.0419616
ILMN_1786470	C1ORF74	NA	1.09126	0.126	0.588105	1.10412	0.142902	0.662521	1.02238	0.0319325	0.711531	1.05953	0.0834254	0.658843	0.981089	-0.0275441	0.459543
ILMN_1736234	C1ORF77	NA	1.21926	0.286	0.014269	1.05473	0.0768759	1	0.989292	-0.0155316	0.853307	0.942786	-0.0849983	0.13332	0.884292	-0.177406	0.355226
ILMN_3263575	C1ORF81	NA	0.962594	-0.055	0.696715	0.719469	-0.474995	0.245278	0.989558	-0.0151436	0.883617	1.04679	0.0659729	1	1.43976	0.525824	0.464214
ILMN_1673544	C1ORF83	NA	0.953299	-0.069	0.687594	0.794331	-0.332187	0.0808556	0.66483	-0.588943	0.0419616	1.044	0.0621167	0.929637	0.873792	-0.194639	0.459543
ILMN_1716517	C1ORF84	NA	0.99103	-0.013	0.959077							0.981804	-0.0264932	0.77283
ILMN_1698243	C1ORF85	NA	0.428094	-1.224	0	0.776403	-0.365123	0.662521	0.825217	-0.277155	0.853307	0.982803	-0.0250258	0.658843	1.04459	0.0629423	1
ILMN_1726989	C1ORF86	NA	1.05555	0.078	0.613521	0.769251	-0.378473	0.19043	0.8441	-0.244515	0.195562	1.00143	0.00205991	0.859819	1.26275	0.336569	0.0960923
ILMN_2097943	C1ORF87	NA	1.00208	0.003	0.989396				1.07705	0.107091	1	0.777027	-0.363964	0.0528075
ILMN_1761278	C1ORF88	NA	1.08598	0.119	0.484102	1.01249	0.0179136	0.662521	1.44996	0.536009	0.5791	0.83135	-0.266472	0.525358	1.25103	0.323119	0.723674
ILMN_1683990	C1ORF89	NA	0.895025	-0.16	0.218684	0.844432	-0.243947	0.19043	1.15756	0.211084	1	0.695385	-0.524116	0.0092178	0.953243	-0.0690843	0.918707
ILMN_1742324	C1ORF9	NA	0.882091	-0.181	0.255456	0.612868	-0.706352	0.19043	0.650564	-0.620237	0.0644577	1.31446	0.394466	0.0750492	1.39531	0.480581	0.184573
ILMN_1673752	C1ORF91	NA	0.869947	-0.201	0.174975	0.803771	-0.315143	0.662521	0.852851	-0.229634	0.711531	0.7933	-0.334062	0.13332	0.84174	-0.248553	0.5791
ILMN_1681923	C1ORF92	NA	0.923382	-0.115	0.450122				1.04995	0.0703254	0.698535
ILMN_3243682	C1orf93	NA				0.723352	-0.467231	0.382733	0.668387	-0.581244	0.0960923	0.858226	-0.220571	0.0636898	0.793013	-0.334584	0.0419616
ILMN_1664592	C1ORF95	NA	1.1088	0.149	0.390652	1.30981	0.389355	0.19043	1.1731	0.230325	0.474959	1.13248	0.179481	0.885234	1.01428	0.0204507	0.853307
ILMN_1699217	C1ORF96	NA	0.97942	-0.03	0.885889	0.928015	-0.10778	0.77283	1.01864	0.0266495	0.648503	1.05432	0.0763062	0.602524	1.15728	0.210736	0.513891
ILMN_1808769	C1ORF97	NA	1.04391	0.062	0.806381	0.937446	-0.0931932	0.382733	0.744179	-0.426279	0.01623	1.06061	0.0848894	0.929637	0.858545	-0.220034	0.0265003
ILMN_1737918	C1QA	712	1.0196	0.028	0.89532	0.876354	-0.190415	0.386476	0.773763	-0.370036	0.175244	1.0885	0.122337	0.870991	0.961072	-0.0572842	0.819708
ILMN_1668996	C1QBP	708	1.46003	0.546	4.9e-05	0.882539	-0.180268	0.19043	0.894709	-0.160509	0.267257	0.938214	-0.0920116	0.596242	0.951151	-0.0722534	0.5791
ILMN_1785902	C1QC	714	1.01326	0.019	0.935966
ILMN_1716957	C1QL1	10882				0.671516	-0.574507	0.371093	0.71799	-0.477963	0.0281858	1.01699	0.0243125	0.936186	1.08738	0.120856	0.802587
ILMN_1756236	C1QL2	165257	1.02669	0.038	0.827718	1.02069	0.0295486	0.77283	0.908865	-0.137862	0.609834	0.883914	-0.178023	0.494837	0.787072	-0.345433	0.695299
ILMN_2050970	C1QL3	389941	1.02954	0.042	0.845206
ILMN_1808117	C1QL4	338761										0.701133	-0.51224	0.662521
ILMN_2380237	C1QTNF1	114897	0.513345	-0.962	0
ILMN_1804604	C1QTNF3	114899	0.940826	-0.088	0.680006
ILMN_1744487	C1QTNF5	114902	0.553249	-0.854	0.004488
ILMN_1729288	C1QTNF6	114904	0.896267	-0.158	0.501064	0.851387	-0.232113	0.662521	0.858276	-0.220486	0.332922	0.884465	-0.177123	0.170904	0.781578	-0.355539	0.066753
ILMN_2155312	C1QTNF9B	387911	1.03742	0.053	0.816989				0.713371	-0.487275	1	0.885855	-0.174858	0.662521
ILMN_1764109	C1R	715	0.707107	-0.5	0.008936	0.973576	-0.038634	0.662521	0.918562	-0.122552	0.853307	0.837094	-0.256539	0.331387	0.789791	-0.340457	0.459543
ILMN_1733288	C1RL	51279				0.662557	-0.593884	0.540291	0.906988	-0.140844	0.846451	0.649414	-0.62279	0.0337522	0.888996	-0.16975	0.816961
ILMN_1677603	C1S	716	0.828171	-0.272	0.175957
ILMN_1710740	C2	717	0.843231	-0.246	0.095314							0.895886	-0.158614	0.540291
ILMN_2082209	C20ORF100	NA	0.750019	-0.415	0.000658	1.23696	0.306796	0.19043	0.832984	-0.26364	0.0960923	1.11555	0.15775	0.596242	0.751224	-0.412685	0.0960923
ILMN_1714667	C20ORF107	NA	1.10573	0.145	0.280129	0.626611	-0.674359	0.371093	0.738436	-0.437456	0.288844	0.82161	-0.283474	0.193931	0.968235	-0.0465711	0.595883
ILMN_1708016	C20ORF108	NA	1.07177	0.1	0.635611	0.778473	-0.361281	0.382733	0.664737	-0.589145	0.0960923	0.958154	-0.0616708	0.377225	0.818166	-0.289534	0.0265003
ILMN_1755909	C20ORF11	NA	1.15509	0.208	0.122446	0.841818	-0.24842	0.662521	0.711094	-0.491887	0.0644577	0.95694	-0.0634991	0.723932	0.80834	-0.306966	0.355226
ILMN_2049727	C20ORF111	NA	1.5768	0.657	4.1e-05	0.928535	-0.106972	0.0808556	1.10354	0.142137	0.853307	0.93744	-0.0932016	0.596242	1.11412	0.155907	0.355226
ILMN_1652219	C20ORF112	NA	0.988286	-0.017	0.947519	1.23837	0.308445	0.540291	0.896609	-0.15745	0.558185	1.01419	0.0203301	1	0.734297	-0.445565	0.148915
ILMN_1733904	C20ORF114	NA	0.856782	-0.223	0.057396				0.635554	-0.653914	1	0.91317	-0.131045	1
ILMN_1693004	C20ORF117	NA	1.11884	0.162	0.252433	0.841863	-0.248342	0.0808556	0.760117	-0.395707	0.0644577	0.743408	-0.427774	0.157704	0.671222	-0.575139	0.0265003
ILMN_1664242	C20orf12	NA				0.780741	-0.357084	1	0.930268	-0.104282	0.802587	0.907466	-0.140084	0.802587	1.08126	0.112718	1
ILMN_1662640	C20ORF127	NA	0.562919	-0.829	9.8e-05	1.14708	0.197961	1	1.19813	0.260786	0.382733	0.581118	-0.783096	0.00216379	0.606984	-0.72027	0.082731
ILMN_1809767	C20ORF132	NA	1.02669	0.038	0.871529
ILMN_1698298	C20orf133	NA							0.972186	-0.0406965	0.802587	1.06485	0.090647	0.749119
ILMN_1733531	C20orf134	NA				1.28359	0.360184	0.662521	0.975818	-0.0353168	0.859684	1.13108	0.1777	0.315874	0.859875	-0.217801	0.853307
ILMN_2092903	C20ORF141	NA	0.895025	-0.16	0.174946
ILMN_1682863	C20orf151	NA				0.859665	-0.218154	0.662521	0.650997	-0.619277	0.139087	0.922789	-0.115927	0.658843	0.698799	-0.51705	0.267257
ILMN_1748206	C20orf160	NA				1.0141	0.0202017	1	0.757792	-0.400126	0.0419616	1.01775	0.0253828	0.723932	0.760519	-0.394945	0.0644577
ILMN_1785476	C20ORF165	NA	0.908148	-0.139	0.388244
ILMN_1791248	C20ORF175	NA	1.10726	0.147	0.271906	1.18277	0.242169	0.540291	1.13388	0.181263	0.371093	0.704029	-0.506293	0.371093	0.674926	-0.567199	0.540291
ILMN_1718712	C20ORF177	NA	1.02954	0.042	0.853557	0.787312	-0.344993	0.662521	0.95161	-0.0715575	0.853307	0.834586	-0.260867	0.536499	1.00875	0.0125678	0.853307
ILMN_2044027	C20ORF191	NA	1.19665	0.259	0.089923	1.00321	0.00462818	1	1.03035	0.0431381	0.853307	0.831466	-0.266271	0.0773886	0.853959	-0.227761	0.139087
ILMN_1689585	C20ORF194	NA	0.896267	-0.158	0.310875	1.02969	0.0422035	0.662521	0.692284	-0.530565	0.139087	0.908934	-0.137753	0.929637	0.6111	-0.710521	0.139087
ILMN_3188984	C20ORF199	NA	1.50212	0.587	0.00093	0.836196	-0.258086	1	0.819202	-0.287708	1	1.07692	0.106911	0.723932	1.05503	0.0772891	0.711531
ILMN_1790136	C20ORF20	NA	1.32409	0.405	0.000284	0.85207	-0.230955	0.382733	0.994661	-0.00772323	1	1.02174	0.0310225	0.929637	1.19272	0.254255	0.5791
ILMN_2387599	C20ORF24	NA	1.06955	0.097	0.58387	1.12377	0.168347	0.382733	0.908684	-0.13815	0.0419616	0.995345	-0.00673092	0.536499	0.780604	-0.357337	0.0265003
ILMN_1697363	C20ORF27	NA	0.946058	-0.08	0.647786	0.934754	-0.0973421	0.382733	0.775314	-0.367147	0.0960923	0.902056	-0.148711	0.479929	0.748194	-0.418516	0.195562
ILMN_1785644	C20ORF29	NA	0.949342	-0.075	0.67645	0.875393	-0.191998	0.662521	0.880968	-0.182838	0.459543	0.875672	-0.191537	0.0520588	0.88125	-0.182377	0.139087
ILMN_1674394	C20ORF3	NA	0.811127	-0.302	0.025712	0.853257	-0.228948	0.19043	0.723135	-0.467662	0.0419616	1.02899	0.0412327	0.723932	0.872072	-0.197482	0.0644577
ILMN_2404539	C20ORF30	NA	0.925946	-0.111	0.536215	0.962596	-0.0549976	0.662521	0.818159	-0.289546	0.0265003	0.9497	-0.074457	0.216373	0.807198	-0.309006	0.01623
ILMN_1721225	C20ORF4	NA	1.25788	0.331	0.016474	0.996919	-0.0044511	1	0.874027	-0.19425	0.355226	0.941464	-0.0870222	1	0.825408	-0.276821	0.267257
ILMN_1771815	C20ORF43	NA	0.956608	-0.064	0.757621	0.96054	-0.0580822	0.382733	0.871451	-0.198509	0.195562	0.969381	-0.0448643	0.596242	0.879472	-0.185291	0.139087
ILMN_1728168	C20ORF45	NA	0.892547	-0.164	0.314812	1.06673	0.0931915	1	0.94514	-0.0814002	0.853307	0.961129	-0.0571981	0.216373	0.851578	-0.23179	0.195562
ILMN_1680665	C20ORF51	NA	0.959929	-0.059	0.790713
ILMN_1801633	C20ORF52	NA	0.896888	-0.157	0.339441	0.959582	-0.0595219	0.382733	0.820436	-0.285537	0.0644577	0.939274	-0.0903816	0.185326	0.803073	-0.316397	0.0419616
ILMN_1740923	C20ORF54	NA	0.887611	-0.172	0.207939	0.701234	-0.512032	0.0808556	0.752171	-0.410867	0.139087	1.01012	0.0145264	0.596242	1.08349	0.115692	0.355226
ILMN_1782095	C20ORF55	NA	0.99654	-0.005	0.97919	0.7762	-0.365501	0.0808556	0.716706	-0.480548	0.0265003	0.99568	-0.00624534	0.929637	0.919364	-0.121292	0.853307
ILMN_1779974	C20orf62	NA				0.538131	-0.893971	0.245278	0.616032	-0.698923	0.107347	0.76928	-0.378419	0.219303	0.880643	-0.183371	0.487453
ILMN_2350607	C20ORF7	NA	1.22095	0.288	0.11341	0.920689	-0.119214	0.382733	0.711715	-0.490628	0.139087	1.0726	0.101113	0.723932	0.837412	-0.255991	0.267257
ILMN_1762670	C20ORF70	NA	0.882091	-0.181	0.17178
ILMN_2176251	C20ORF72	NA	1.23285	0.302	0.026986	0.920247	-0.119907	0.662521	0.86085	-0.216167	0.5791	1.01295	0.0185625	0.859819	0.947569	-0.0776973	0.355226
ILMN_1764885	C20ORF75	NA	0.856782	-0.223	0.131717
ILMN_1661618	C20ORF85	NA	1.09429	0.13	0.343951
ILMN_1751045	C20ORF86	NA	1.16959	0.226	0.13257				1.12744	0.173047	1
ILMN_1775686	C20ORF91	NA	1.06069	0.085	0.588305
ILMN_1715625	C20ORF94	NA	1.16473	0.22	0.113765	0.851184	-0.232457	0.382733	0.707928	-0.498325	0.459543	0.984629	-0.0223475	0.331387	0.818914	-0.288216	0.5791
ILMN_1808633	C20orf96	140680
ILMN_1667790	C21ORF100	NA	1.3113	0.391	0.00033
ILMN_1728403	C21ORF119	NA	1.14472	0.195	0.193118	1.35642	0.439808	0.662521	1.22572	0.293632	0.459543	1.13128	0.17795	0.479929	1.02227	0.0317745	0.711531
ILMN_1697872	C21ORF121	NA	1.10957	0.15	0.292208
ILMN_1749424	C21ORF122	NA	0.949342	-0.075	0.615486							1.37361	0.457974	0.765594
ILMN_1764503	C21orf124	NA				0.922915	-0.11573	0.19043	0.852132	-0.230851	0.459543	0.855487	-0.225182	0.859819	0.789875	-0.340303	0.853307
ILMN_3177348	C21orf126	NA				0.742556	-0.429429	0.19043	0.760514	-0.394953	0.139087	1.1361	0.184086	0.596242	1.16357	0.218563	0.5791
ILMN_1663893	C21ORF128	NA	1.05117	0.072	0.671224	0.52384	-0.932801	0.148915	0.619292	-0.691309	0.110612	1.01085	0.0155636	0.772337	1.19504	0.257056	0.896125
ILMN_3178461	C21ORF136	NA	1.10573	0.145	0.324363
ILMN_1758806	C21ORF2	NA	1.08673	0.12	0.535405	0.945904	-0.0802349	0.662521	0.715202	-0.483578	0.0644577	0.957213	-0.0630882	0.791082	0.723753	-0.466432	0.0644577
ILMN_1661954	C21ORF24	NA	0.889459	-0.169	0.217083	0.683701	-0.548562	0.382733	0.823928	-0.27941	0.711531	0.89905	-0.153526	0.536499	1.08344	0.115626	0.355226
ILMN_3178967	C21ORF30	NA	0.97942	-0.03	0.886249	0.92396	-0.114098	0.662521	0.787238	-0.345129	0.355226	0.863764	-0.21129	0.289315	0.735949	-0.442322	0.0960923
ILMN_1737588	C21ORF33	NA	1.13918	0.188	0.300449	0.814509	-0.295998	0.0808556	0.701208	-0.512087	0.01623	0.992117	-0.0114171	0.426777	0.71191	-0.490233	0.0644577
ILMN_2283814	C21ORF34	NA	1.10726	0.147	0.303525	0.727549	-0.458883	0.19043	0.454784	-1.13675	0.0644577	0.798801	-0.324091	0.215925	0.800092	-0.321763	0.371093
ILMN_1675632	C21ORF37	NA	1.00417	0.006	0.975279	0.862084	-0.2141	0.662521	0.692543	-0.530025	0.139087	0.9649	-0.0515486	0.736277	0.775139	-0.367473	0.184573
ILMN_1722407	C21ORF41	NA	0.946714	-0.079	0.631302	0.799876	-0.322151	0.698535	0.922169	-0.116897	0.896125	0.984462	-0.022593	0.798907	1.13498	0.182661	0.487453
ILMN_1712386	C21orf45	NA				0.955442	-0.0657604	0.0808556	0.831476	-0.266254	0.0644577	0.978062	-0.0320014	0.791082	0.889623	-0.168734	0.0960923
ILMN_3307211	C21ORF49	NA	1.13446	0.182	0.157639
ILMN_2266005	C21ORF51	NA	0.911933	-0.133	0.420011	0.975963	-0.0351015	0.382733	0.795449	-0.33016	0.139087	0.823909	-0.279443	0.0520588	0.788739	-0.342379	0.0265003
ILMN_1814204	C21orf55	NA				0.826365	-0.275148	0.19043	0.904796	-0.144335	0.5791	0.904534	-0.144753	0.723932	0.990384	-0.0139398	1
ILMN_1716838	C21ORF56	NA	1.04391	0.062	0.736688	0.878313	-0.187194	1	0.849395	-0.235493	0.459543	0.823289	-0.28053	0.0636898	0.796182	-0.32883	0.195562
ILMN_1795836	C21ORF57	NA	1.46815	0.554	0.001001	1.23313	0.30232	0.662521	0.802128	-0.318096	0.0419616	1.03512	0.0497983	0.536499	0.819798	-0.28666	0.195562
ILMN_2310296	C21orf58	54058				1.00679	0.00976504	1	1.02227	0.0317705	0.5791	0.860856	-0.216156	0.157704	0.874088	-0.19415	0.0960923
ILMN_1764329	C21ORF59	NA	1.1607	0.215	0.149995	0.9682	-0.0466237	0.662521	0.82464	-0.278164	0.0419616	0.832159	-0.26507	0.0933977	0.794255	-0.332326	0.0960923
ILMN_1695959	C21ORF63	NA	1.00278	0.004	0.983823	0.834139	-0.26164	0.77283	0.761191	-0.393669	0.0960923	1.04216	0.0595727	0.596628	0.951017	-0.0724568	0.883617
ILMN_2251978	C21ORF66	NA	1.32593	0.407	0.025491	1.08965	0.123871	0.382733	1.35499	0.438283	0.195562	0.798703	-0.324269	0.111961	1.67983	0.748314	0.267257
ILMN_1808602	C21ORF67	NA	1.03311	0.047	0.810086
ILMN_1772575	C21ORF69	NA	0.911301	-0.134	0.435717	1.33104	0.41255	0.386476	1.30195	0.380678	0.698535	0.923838	-0.114288	0.477675	0.903652	-0.146161	0.513891
ILMN_1699071	C21ORF7	NA	0.828171	-0.272	0.118598							1.22185	0.289067	0.540291
ILMN_2104924	C21ORF70	NA	1.38319	0.468	0.000151	0.841078	-0.249688	0.0808556	0.920995	-0.118735	0.195562	0.894757	-0.160433	0.536499	0.972973	-0.0395281	0.711531
ILMN_3246107	C21orf71	NA				1.13033	0.176743	0.662521	0.856794	-0.22298	0.254451	0.879729	-0.184869	0.898327	0.666838	-0.584592	0.17146
ILMN_1724299	C21ORF81	NA	0.942131	-0.086	0.614184	0.870549	-0.200002	0.0808556	0.880798	-0.183117	0.195562	0.678218	-0.560179	0.13332	0.686202	-0.543294	0.267257
ILMN_1694182	C21ORF84	NA	1.00696	0.01	0.966718
ILMN_2202320	C21ORF87	NA	1.13524	0.183	0.26417
ILMN_3263072	C21ORF89	NA	0.952638	-0.07	0.671793
ILMN_1698166	C21ORF91	NA	1.1599	0.214	0.173836	0.743908	-0.426803	0.540291	2.9534	1.56238	0.241567	0.785641	-0.348057	0.596242	4.00332	2.0012	0.148915
ILMN_1764410	C22ORF13	NA	0.903753	-0.146	0.2772	0.860405	-0.216912	0.662521	0.71792	-0.478106	0.0960923	1.00448	0.00644431	0.377225	0.838133	-0.25475	0.0644577
ILMN_1802771	C22ORF15	NA	0.972655	-0.04	0.840661
ILMN_1721338	C22orf23	84645				0.716371	-0.481221	0.371093	0.627983	-0.671202	0.540291	1.0737	0.102594	0.386476	0.941226	-0.0873875	1
ILMN_3249095	C22orf24	25775				0.816076	-0.293224	0.148915	0.962163	-0.0556473	0.77283	0.730424	-0.453195	0.0226545	0.861177	-0.215618	0.361935
ILMN_1789405	C22ORF25	NA	0.929805	-0.105	0.529452	1.19999	0.263017	1	1.04942	0.0695971	0.474959	0.893512	-0.162442	0.312321	0.781403	-0.355861	0.139087
ILMN_1673743	C22orf26	NA				0.800829	-0.320433	0.698535	0.743973	-0.426678	0.243345	1.00604	0.00869058	0.617075	0.934616	-0.0975544	0.464214
ILMN_3196690	C22ORF27	NA	1.25093	0.323	0.026029	1.05813	0.0815173	1	0.906641	-0.141396	0.459543	1.047	0.0662593	0.516868	0.897103	-0.156654	0.366157
ILMN_1795991	C22ORF28	NA	0.969962	-0.044	0.814242	0.941992	-0.0862128	0.382733	0.790551	-0.339069	0.0960923	0.919562	-0.120981	0.426777	0.771727	-0.373837	0.0644577
ILMN_1759595	C22ORF29	NA	1.06807	0.095	0.610707	0.808729	-0.306272	0.19043	0.763242	-0.389788	0.0960923	0.916671	-0.125524	0.596242	0.865113	-0.209039	0.5791
ILMN_3307887	C22ORF30	NA	1.17609	0.234	0.077143	0.996614	-0.00489294	1	0.965086	-0.0512701	0.711531	1.19075	0.251866	0.270344	0.95859	-0.061014	0.195562
ILMN_1706859	C22orf32	NA				0.877235	-0.188964	0.662521	0.845916	-0.241414	0.267257	0.718394	-0.477152	0.723932	0.692746	-0.529602	0.139087
ILMN_1663417	C22ORF33	NA	1.07549	0.105	0.625237	0.721955	-0.470019	0.0808556	0.84662	-0.240213	0.267257	1.00556	0.00799697	0.723932	1.1792	0.237803	0.355226
ILMN_1737255	C22ORF36	NA	1.20247	0.266	0.046358	1.07339	0.102172	1	0.8552	-0.225665	0.195562	1.06717	0.0937848	1	0.850243	-0.234053	0.195562
ILMN_1804884	C22ORF39	NA	1.14631	0.197	0.177403	1.04441	0.0626894	1	1.05294	0.0744296	1	0.895254	-0.15963	0.377225	0.90257	-0.14789	0.355226
ILMN_1660379	C22ORF40	NA	0.968618	-0.046	0.819848	0.887581	-0.17205	0.382733	0.707667	-0.498857	0.558185	0.812493	-0.299572	0.157704	1.02573	0.0366458	0.540291
ILMN_1757347	C22ORF9	NA	0.965936	-0.05	0.77533	0.707622	-0.498949	0.382733	0.456909	-1.13002	0.0265003	1.05769	0.0809163	0.832339	0.682946	-0.550156	0.0226545
ILMN_1652512	C2CD2	25966	0.829895	-0.269	0.177222	0.758149	-0.399447	0.0808556	0.804673	-0.313525	0.0644577	0.804147	-0.314469	0.0933977	0.714425	-0.485146	0.01623
ILMN_1778132	C2CD2L	9854				0.866625	-0.20652	0.382733	0.746637	-0.421522	0.0644577	0.960593	-0.0580024	0.536499	0.827594	-0.273005	0.355226
ILMN_1769925	C2CD4A	145741	0.950659	-0.073	0.632652
ILMN_3248551	C2CD4B	388125	1.27987	0.356	0.011292
ILMN_3236321	C2CD4C	126567	0.94737	-0.078	0.714139	0.980478	-0.0284429	0.698535	0.928395	-0.107189	0.617075	1.36183	0.445551	0.133614	1.28949	0.366805	0.698535
ILMN_3248176	C2CD4D	100191040							1.00835	0.0119967	1	0.710238	-0.493625	1
ILMN_1732404	C2ORF15	NA	0.940826	-0.088	0.652692	0.880358	-0.183837	0.382733	0.743305	-0.427974	0.139087	0.921263	-0.118315	0.426777	0.777842	-0.362452	0.0960923
ILMN_1812688	C2orf18	NA				0.782629	-0.3536	0.382733	0.760243	-0.395467	0.5791	1.14621	0.196873	0.426777	1.11343	0.155006	0.5791
[truncated: 20,851 more rows]
