# Supplementary material for: TP53mutation–associated and copy number–dependent KDM7A-DT expression affects DNA repair and promotes invasive breast cancer progression
Source: Research Square preprint supplement (doi:10.21203/rs.3.rs-1896103/v3), 2022-09-27
Supplement: Supplementary file 18 [file bf8dcf74942588f0068d54ac.docx]

**Figure S1.** Selected stress-induced paancRNAs critically affect the morphology of non-malignant cells. **A.** The morphology of MRC5 fibroblasts was significantly altered upon over-expression of all four selected si-paancRNAs compared to their normal phenotype. In brief, MRC5 control cells showed the expected small spindle morphology, which, upon over-expression of all si-paancRNAs, changed to a flattened and relatively enlarged shape. GFP fluorescence intensity was used to adjust the expression levels of all paancRNA clones to similar levels with the empty pCDH vector. **B.** Quantification of genomic integration of vector sequences, LTR-GAG transgene, and GFP by qRT-PCR. Titrations were confirmed by FACS and PCR in target cell lines using specific primers. Specific primers for LTR-GAG: 5′- TGTGTGCCCGTCTGTTGTGTGAC-3′. 5′-TCGGGCGCCACTGCTAGA G-3′; and for GFP: 5′-AGAGCACCAAAGGCGCCCTG-3′; and 5′-TGCGGGTG TTGGTGTAGC-3′ were used to determine lentiviral genomic integration.

**Figure S2.** Genomic characterization of *KDM7A-DT* locus. **A.** *KDM7A-DT* is located on the promoter of a divergent transcription locus. At 30 minutes of OS, it is transiently but acutely significantly elongating in the antisense direction of the promoter of the *KDM7A* coding gene, visualized by the integrative genome viewer (IGV). Tracks presented are total pol2 and S5-pol2 ChIP-sequencing (upper panel), and normalized sequencing reads from MRC5 cells untreated (in blue) or treated with OS for 30 minutes (in pink) and 2 hours (in red). **B.** Representation of gene walking primer pairs at a rolling window of approximately 250 bps in length across *KDM7A-DT*’s gene, northern blot probes that utilized (in red), and amplicons, ASOs, LNAs, qPCR primer, repeat elements.

**Figure S3.** Strandspecificity dictates KDM7A-DT regulatory function in the cell cycle and DDR/R. **A.** MRC5 cells over-expressing the complementary strand of KDM7A-DT transcript (labeled as antisense KDM7A-DT) does not affect the morphology of normal fibroblast MRC5 compared to cells over-expressing just the vehicle control. In addition, the forced expression of *KDM7A-DT*’s complementary strand is also not affecting. **B.** normal cell cycle progression. **C.** phosphorylation levels of the H2AX protein compared to control cells.

**Figure S4**. Genetic alterations (Copy number alterations (CNA) and significant classes of mutations). **A.** genes *KDM7A-DT*, *TP53BP1*, *BCL2,* and *TP53* were defined in 2,583 tumor samples represented by the Pan-Cancer Analysis of Whole Genomes (PCAWG) Consortium. Source data from UCSC Xena and ICGC Data Portal. About in 7.3% of cases (189/2583), the *KDM7A-DT* locus was amplified. The 2.7%, 6%, and 36% gene alterations were found for protein-coding genes *TP53BP1*, *BCL2,* and *TP53,* respectively. **B. C. D. E.** Association of *TP53* mutation types and expression patterns of KDM7A-DT and TP53 across BC subtypes and *KDM7A-DT* CNA categories (TCGA data have been analyzed, see Method for details).

**Figure S5**. Association of KDM7A-DT expression with BC subtypes, clinical characteristics, estrogen receptor, **A. D.** Boxplots of *KDM7A-DT* expression across BC subtypes. **B. E.** *KDM7A-DT* expression is positively correlated with histological grade. **C. F.** *KDM7A-DT* expression is positively correlated with positive ER status. **G. H.** *KDM7A-DT* expression is negatively correlated with *ESR1* RNA and protein expression.

**Figure S6.** Protein-protein networks of46 DDR proteins positively and negatively correlated with KDM7-DT RNA expression data were downloaded from sBioPortal (TCGA, 2018). The proteins have been selected as described in the Methods. Each protein expression is also correlated with corresponding mRNA levels of a DDR gene encoding these products. STRING 11.5 is used for annotation, network construction, and enrichment analysis. These results are concordant with our experimental data analyses.

**Figure S7.** Mutations in *GATA3* and *TP53* affect the expression of *KDM7A-DT*. **A.** Heatmap of top 10 correlated proteins with *KDM7A-DT* expression. **B.** *KDM7A-DT* expression and GATA3, TP53BP1, p53 protein levels alterations in *TP53* and *GATA3* mutated samples compared to non-mutated samples. The green arrow represents a statistically significant increase, and the orange arrow a statistically significant decrease (p<0.05). **C.** *TP53* and *GATA3* mutated samples across breast cancer subtypes in the TCGA dataset.

**Figure S8.** Knock-down ofKDM7A-DT targeting either the start or the end of the transcript increases H2AX phosphorylation levels in T47D BC cells. **A**. Knock-down experiments with three different ASO gapmers targeting the beginning of KDM7A-DT significantly downregulate transcript levels compared to a control ASO (NC ASO), as quantified by RT-qPCR using a primer at the transcript’s end. **B.** All three different ASO gapmers significantly inhibit T47D cell viability compared to cells transfected with or without a control ASO. **C.** All three ASOs significantly increase the phosphorylation levels of H2AX protein compared to control ASO. **D.** Four different LNAs (IS1, IS2, IS3, IS4) targeting the beginning of *KDM7A-DT*,as analyzed by qPCR using a primer pair amplifying the end of KDM7A-DT transcript, compared to control LNA. **E.** Four different LNAs (L1, L2, L3, and L4) target the transcript's end. **F.** Three out of four LNAs (IS2, IS3, IS4) targeting the beginning of the transcript modestly increase the phosphorylation of H2AX compared to control LNA. **G. H.** Three out of four LNAs (L1, L3, L4) targeting the end of the transcript significantly increase the phosphorylation of H2AX, compared to control LNA, when cells are not treated with H2O2, while all of them, as well as the control LNA, strongly increase the phosphorylation of H2AX, when cells are treated with H2O2.

**Figure S9.** Oxidative stress induces H2AX phosphorylation and the DDR/R *via* the NHEJ pathway. **A.** OS (H2O2, 0.2 mM) is activating H2AX phosphorylation in T47D BC cells similar to classical DNA-damage inducers, such as Doxorubicin (1 mM) and Etoposide (10 μM). **B.** In T47D cells, the expression levels of TP53BP1 and RAD51 proteins are analyzed at three different time points (30 min, 2 hours, and 24 hours) following H2O2 treatment. In brief, RAD51 levels are downregulated at the 24-hour time-point (and remain unaffected at 30 minutes and 2 hours), compared to untreated cells. In contrast, TP53BP1 levels are sharply upregulated at 30 minutes, reaching a maximum at 2 hours and reducing at 24 hours. Essentially, three TP53BP1 protein isoforms occurred at 2 hr, while two isoforms occurred at 30 min and 24 hr. Therefore, the 30-minute time-point was selected for further analysis. A relative TP53BP1 expression (**C**) and a relative phosphorylated ATM level (D) in KDM7A-DT knock-down v.s. control in a nuclear area T47D BC cell under untreated conditions and after 30 minutes of OS (H2O2, 0.2 mM) compared to control cells (Nc LNA).

**Figure S10**. Venn diagram of TCGA BRCA samples genes that are positive- (**A**) and negative- (**B**) correlated with the expression level of KDM7A-DT RNA. TCGA data gene subsets were categorized into Tumor suppressors and Oncogenes, and also Type II EMT genes (BRCA RNA-seq expression data were analyzed, see Methods). Datasets from the dbEMT-2 database were used.

**Figure S11.**  Survival prediction analysis of BC patients defined by the mRNA level of tumor suppressor SMAD3 that expression was negatively correlated with KDM7A-DT expression. **A**. Affymetrix U133A microarray expression data of SMAD3 (probesets 205396_at), progression-free survival (PFS) time, and events for all BC 4,929 patients available from the Kaplan-Meier Plotter (K-M plotter) database (<https://kmplot.com/analysis/index.php?p=service>). **B.** The K-M survival functions for 446 basal-like (BL) BC patients. The functions were defined under the same conditions as for all patients.
