# Supplementary material for: TP53mutation–associated and copy number–dependent KDM7A-DT expression affects DNA repair and promotes invasive breast cancer progression
Source: Research Square preprint supplement (doi:10.21203/rs.3.rs-1896103/v3), 2022-09-27
Supplement: Supplementary file 19 [file d105269f8fe21b6049997665.xlsx]

## Sheet: ST8
Table S8. PANTHER Overrepresentation Test (Biological Process (BP) and Molecular function (MF) for 88 KDM7A-DT-downregulated EMT fibroblast genes
PANTHER Overrepresentation Test (Released 20220202)
Annotation Version and Release Date:	GO Ontology database DOI: 10.5281/zenodo.6399963 Released 2022-03-22
Analyzed List:	Client Text Box Input (Homo sapiens)
Reference List:	Homo sapiens (all genes in database)
Test Type:	FISHER
Correction:	FDR
GO molecular function(MF)	Homo sapiens - REFLIST (20589)	Client Text Box Input (91)	Client Text Box Input (expected)	Client Text Box Input (over/under)	Client Text Box Input (fold Enrichment)	Client Text Box Input (raw P-value)	Client Text Box Input (FDR)
extracellular matrix structural constituent (GO:0005201)	173	30	0.76	+	39.23	3.75e-38	1.84e-34
structural molecule activity (GO:0005198)	729	33	3.22	+	10.24	2.19e-24	5.36e-21
extracellular matrix structural constituent conferring tensile strength (GO:0030020)	41	12	0.18	+	66.22	5.72e-18	9.35e-15
collagen binding (GO:0005518)	69	13	0.3	+	42.63	3.32e-17	4.07e-14
integrin binding (GO:0005178)	159	16	0.7	+	22.77	5.18e-17	5.08e-14
protein-containing complex binding (GO:0044877)	1292	31	5.71	+	5.43	3.23e-15	2.64e-12
growth factor binding (GO:0019838)	134	12	0.59	+	20.26	1.9e-12	1.33e-09
cell adhesion molecule binding (GO:0050839)	551	19	2.44	+	7.8	4.96e-12	3.04e-09
extracellular matrix binding (GO:0050840)	56	9	0.25	+	36.36	1.08e-11	5.88e-09
signaling receptor binding (GO:0005102)	1594	29	7.05	+	4.12	2.82e-11	1.38e-08
platelet-derived growth factor binding (GO:0048407)	11	6	0.05	+	> 100	7.31e-11	3.26e-08
fibronectin binding (GO:0001968)	31	7	0.14	+	51.09	2.85e-10	1.17e-07
protease binding (GO:0002020)	138	10	0.61	+	16.4	1.02e-09	3.84e-07
glycosaminoglycan binding (GO:0005539)	241	11	1.07	+	10.33	1.42e-08	4.97e-06
peptidase regulator activity (GO:0061134)	233	10	1.03	+	9.71	1.17e-07	3.81e-05
serine-type endopeptidase inhibitor activity (GO:0004867)	101	7	0.45	+	15.68	4.91e-07	0.000151
calcium ion binding (GO:0005509)	734	15	3.24	+	4.62	8.92e-07	0.000258
procollagen-lysine 5-dioxygenase activity (GO:0008475)	3	3	0.01	+	> 100	1.63e-06	0.000445
endopeptidase inhibitor activity (GO:0004866)	183	8	0.81	+	9.89	2.02e-06	0.000522
peptidase inhibitor activity (GO:0030414)	190	8	0.84	+	9.53	2.64e-06	0.000648
peptidyl-lysine 5-dioxygenase activity (GO:0070815)	4	3	0.02	+	> 100	2.85e-06	0.000666
endopeptidase regulator activity (GO:0061135)	197	8	0.87	+	9.19	3.42e-06	0.000762
L-ascorbic acid binding (GO:0031418)	20	4	0.09	+	45.25	3.48e-06	0.000743
extracellular matrix structural constituent conferring compression resistance (GO:0030021)	22	4	0.1	+	41.14	4.87e-06	0.000996
laminin binding (GO:0043236)	28	4	0.12	+	32.32	1.15e-05	0.00225
heparin binding (GO:0008201)	173	7	0.76	+	9.15	1.47e-05	0.00278
protein binding (GO:0005515)	14421	81	63.74	+	1.27	2.69e-05	0.00488
virus receptor activity (GO:0001618)	76	5	0.34	+	14.89	2.91e-05	0.00509
exogenous protein binding (GO:0140272)	77	5	0.34	+	14.69	3.08e-05	0.00522
actin binding (GO:0003779)	451	10	1.99	+	5.02	3.52e-05	0.00576
growth factor receptor binding (GO:0070851)	140	6	0.62	+	9.7	4.55e-05	0.0072
enzyme inhibitor activity (GO:0004857)	399	9	1.76	+	5.1	7.8e-05	0.012
metal ion binding (GO:0046872)	4288	35	18.95	+	1.85	0.000134	0.0199
insulin-like growth factor binding (GO:0005520)	20	3	0.09	+	33.94	0.000137	0.0198
2-oxoglutarate-dependent dioxygenase activity (GO:0016706)	59	4	0.26	+	15.34	0.000171	0.024
procollagen galactosyltransferase activity (GO:0050211)	3	2	0.01	+	> 100	0.00019	0.0259
transcription regulator activity (GO:0140110)	1955	0	8.64	-	< 0.01	0.000209	0.0277
sulfur compound binding (GO:1901681)	272	7	1.2	+	5.82	0.000232	0.03
protein C-terminus binding (GO:0008022)	191	6	0.84	+	7.11	0.000236	0.0297
cation binding (GO:0043169)	4377	35	19.35	+	1.81	0.000257	0.0315
DNA binding (GO:0003677)	2499	1	11.05	-	0.09	0.000259	0.0309
nucleic acid binding (GO:0003676)	3999	5	17.67	-	0.28	0.000265	0.031
fibrinogen binding (GO:0070051)	4	2	0.02	+	> 100	0.000284	0.0324
monosaccharide binding (GO:0048029)	72	4	0.32	+	12.57	0.000353	0.0394
C-X3-C chemokine binding (GO:0019960)	5	2	0.02	+	90.5	0.000396	0.0432
protein-lysine 6-oxidase activity (GO:0004720)	5	2	0.02	+	90.5	0.000396	0.0423
SMAD binding (GO:0046332)	78	4	0.34	+	11.6	0.000472	0.0493
GO biological process (BP)	Homo sapiens - REFLIST (20589)	Client Text Box Input (91)	Client Text Box Input (expected)	Client Text Box Input (over/under)	Client Text Box Input (fold Enrichment)	Client Text Box Input (raw P-value)	Client Text Box Input (FDR)
extracellular matrix organization (GO:0030198)	294	28	1.3	+	21.55	6.89e-29	1.08e-24
extracellular structure organization (GO:0043062)	295	28	1.3	+	21.47	7.52e-29	5.89e-25
external encapsulating structure organization (GO:0045229)	297	28	1.31	+	21.33	8.95e-29	4.68e-25
anatomical structure morphogenesis (GO:0009653)	2185	51	9.66	+	5.28	4.27e-26	1.67e-22
anatomical structure development (GO:0048856)	5029	70	22.23	+	3.15	1.3e-25	4.08e-22
multicellular organism development (GO:0007275)	4129	63	18.25	+	3.45	7.09e-24	1.85e-20
developmental process (GO:0032502)	5561	71	24.58	+	2.89	7.62e-24	1.7e-20
vasculature development (GO:0001944)	530	28	2.34	+	11.95	2.77e-22	5.42e-19
collagen fibril organization (GO:0030199)	69	16	0.3	+	52.46	3.04e-22	5.3e-19
blood vessel development (GO:0001568)	508	27	2.25	+	12.03	1.54e-21	2.41e-18
tissue development (GO:0009888)	1687	40	7.46	+	5.36	7.53e-20	1.07e-16
multicellular organismal process (GO:0032501)	6472	71	28.61	+	2.48	1e-19	1.31e-16
anatomical structure formation involved in morphogenesis (GO:0048646)	913	31	4.04	+	7.68	2.46e-19	2.96e-16
system development (GO:0048731)	3719	55	16.44	+	3.35	4.36e-19	4.88e-16
cell adhesion (GO:0007155)	964	31	4.26	+	7.28	1.11e-18	1.16e-15
circulatory system development (GO:0072359)	890	30	3.93	+	7.63	1.32e-18	1.3e-15
tube morphogenesis (GO:0035239)	666	26	2.94	+	8.83	1.44e-17	1.32e-14
blood vessel morphogenesis (GO:0048514)	421	22	1.86	+	11.82	2.04e-17	1.78e-14
tube development (GO:0035295)	864	28	3.82	+	7.33	6.58e-17	5.43e-14
supramolecular fiber organization (GO:0097435)	573	24	2.53	+	9.48	6.97e-17	5.46e-14
connective tissue development (GO:0061448)	215	16	0.95	+	16.84	4.32e-15	3.23e-12
response to wounding (GO:0009611)	441	20	1.95	+	10.26	9.28e-15	6.61e-12
skeletal system development (GO:0001501)	509	21	2.25	+	9.33	1.08e-14	7.37e-12
wound healing (GO:0042060)	335	18	1.48	+	12.16	1.5e-14	9.78e-12
animal organ morphogenesis (GO:0009887)	988	27	4.37	+	6.18	1.55e-14	9.69e-12
regulation of cell migration (GO:0030334)	918	26	4.06	+	6.41	2.38e-14	1.43e-11
regulation of cell motility (GO:2000145)	976	26	4.31	+	6.03	9.51e-14	5.52e-11
angiogenesis (GO:0001525)	325	17	1.44	+	11.83	1.32e-13	7.39e-11
animal organ development (GO:0048513)	3179	44	14.05	+	3.13	2.17e-13	1.17e-10
regulation of locomotion (GO:0040012)	1021	26	4.51	+	5.76	2.62e-13	1.37e-10
regulation of cell adhesion (GO:0030155)	773	23	3.42	+	6.73	3.76e-13	1.9e-10
regulation of cellular component movement (GO:0051270)	1052	26	4.65	+	5.59	5.12e-13	2.51e-10
cell differentiation (GO:0030154)	3418	45	15.11	+	2.98	5.72e-13	2.72e-10
cellular developmental process (GO:0048869)	3440	45	15.2	+	2.96	7.2e-13	3.32e-10
ossification (GO:0001503)	279	15	1.23	+	12.16	2.85e-12	1.28e-09
cartilage development (GO:0051216)	161	12	0.71	+	16.86	1.42e-11	6.2e-09
cell migration (GO:0016477)	873	22	3.86	+	5.7	3.18e-11	1.35e-08
cell-matrix adhesion (GO:0007160)	133	11	0.59	+	18.71	3.73e-11	1.54e-08
tissue morphogenesis (GO:0048729)	560	18	2.48	+	7.27	5.92e-11	2.38e-08
regulation of hydrolase activity (GO:0051336)	1002	23	4.43	+	5.19	6.41e-11	2.51e-08
regulation of peptidase activity (GO:0052547)	448	16	1.98	+	8.08	1.78e-10	6.79e-08
positive regulation of cell adhesion (GO:0045785)	476	16	2.1	+	7.61	4.18e-10	1.56e-07
localization of cell (GO:0051674)	1032	22	4.56	+	4.82	7.11e-10	2.59e-07
cell motility (GO:0048870)	1032	22	4.56	+	4.82	7.11e-10	2.53e-07
integrin-mediated signaling pathway (GO:0007229)	99	9	0.44	+	20.57	1.13e-09	3.94e-07
cell-substrate adhesion (GO:0031589)	189	11	0.84	+	13.17	1.27e-09	4.32e-07
positive regulation of cell migration (GO:0030335)	526	16	2.32	+	6.88	1.69e-09	5.63e-07
negative regulation of peptidase activity (GO:0010466)	255	12	1.13	+	10.65	2.14e-09	6.99e-07
positive regulation of cell motility (GO:2000147)	550	16	2.43	+	6.58	3.14e-09	1e-06
locomotion (GO:0040011)	1244	23	5.5	+	4.18	3.96e-09	1.24e-06
muscle structure development (GO:0061061)	480	15	2.12	+	7.07	4.06e-09	1.25e-06
positive regulation of cellular component movement (GO:0051272)	564	16	2.49	+	6.42	4.44e-09	1.34e-06
positive regulation of locomotion (GO:0040017)	566	16	2.5	+	6.4	4.67e-09	1.38e-06
regulation of cell-substrate adhesion (GO:0010810)	216	11	0.95	+	11.52	4.79e-09	1.39e-06
regulation of angiogenesis (GO:0045765)	285	12	1.26	+	9.53	7.08e-09	2.02e-06
regulation of vasculature development (GO:1901342)	289	12	1.28	+	9.39	8.22e-09	2.3e-06
regulation of wound healing (GO:0061041)	130	9	0.57	+	15.66	1.06e-08	2.91e-06
cellular component organization (GO:0016043)	5459	50	24.13	+	2.07	1.33e-08	3.61e-06
morphogenesis of an epithelium (GO:0002009)	453	14	2	+	6.99	1.61e-08	4.29e-06
negative regulation of endopeptidase activity (GO:0010951)	246	11	1.09	+	10.12	1.74e-08	4.54e-06
regulation of cellular response to growth factor stimulus (GO:0090287)	311	12	1.37	+	8.73	1.8e-08	4.63e-06
movement of cell or subcellular component (GO:0006928)	1480	24	6.54	+	3.67	2.07e-08	5.22e-06
extracellular matrix assembly (GO:0085029)	34	6	0.15	+	39.93	2.09e-08	5.2e-06
regulation of cellular protein metabolic process (GO:0032268)	2409	31	10.65	+	2.91	2.16e-08	5.28e-06
regulation of multicellular organismal process (GO:0051239)	2721	33	12.03	+	2.74	2.62e-08	6.31e-06
negative regulation of protein metabolic process (GO:0051248)	1040	20	4.6	+	4.35	2.66e-08	6.33e-06
regulation of protein metabolic process (GO:0051246)	2577	32	11.39	+	2.81	2.7e-08	6.31e-06
regulation of proteolysis (GO:0030162)	737	17	3.26	+	5.22	2.73e-08	6.3e-06
negative regulation of cellular process (GO:0048523)	4867	46	21.51	+	2.14	3.37e-08	7.66e-06
regulation of developmental process (GO:0050793)	2463	31	10.89	+	2.85	3.6e-08	8.07e-06
response to transforming growth factor beta (GO:0071559)	151	9	0.67	+	13.49	3.61e-08	7.98e-06
response to growth factor (GO:0070848)	487	14	2.15	+	6.5	3.88e-08	8.45e-06
negative regulation of locomotion (GO:0040013)	336	12	1.49	+	8.08	4.09e-08	8.78e-06
cellular component organization or biogenesis (GO:0071840)	5659	50	25.01	+	2	4.54e-08	9.62e-06
negative regulation of cellular protein metabolic process (GO:0032269)	972	19	4.3	+	4.42	4.92e-08	1.03e-05
negative regulation of proteolysis (GO:0045861)	344	12	1.52	+	7.89	5.24e-08	1.08e-05
regulation of endopeptidase activity (GO:0052548)	419	13	1.85	+	7.02	5.27e-08	1.07e-05
endodermal cell differentiation (GO:0035987)	41	6	0.18	+	33.11	5.71e-08	1.15e-05
regulation of response to wounding (GO:1903034)	161	9	0.71	+	12.65	6.1e-08	1.21e-05
gastrulation (GO:0007369)	162	9	0.72	+	12.57	6.42e-08	1.26e-05
formation of primary germ layer (GO:0001704)	115	8	0.51	+	15.74	7e-08	1.35e-05
response to endogenous stimulus (GO:0009719)	1337	22	5.91	+	3.72	7.21e-08	1.38e-05
negative regulation of hydrolase activity (GO:0051346)	360	12	1.59	+	7.54	8.46e-08	1.6e-05
negative regulation of cell motility (GO:2000146)	301	11	1.33	+	8.27	1.25e-07	2.34e-05
regulation of cell death (GO:0010941)	1631	24	7.21	+	3.33	1.26e-07	2.33e-05
regulation of anatomical structure morphogenesis (GO:0022603)	928	18	4.1	+	4.39	1.32e-07	2.4e-05
cellular response to growth factor stimulus (GO:0071363)	457	13	2.02	+	6.44	1.4e-07	2.52e-05
regulation of molecular function (GO:0065009)	3079	34	13.61	+	2.5	1.46e-07	2.61e-05
positive regulation of cell population proliferation (GO:0008284)	939	18	4.15	+	4.34	1.56e-07	2.75e-05
negative regulation of cellular component movement (GO:0051271)	309	11	1.37	+	8.05	1.61e-07	2.81e-05
regulation of cell population proliferation (GO:0042127)	1663	24	7.35	+	3.27	1.8e-07	3.11e-05
negative regulation of biological process (GO:0048519)	5288	47	23.37	+	2.01	1.86e-07	3.17e-05
endoderm formation (GO:0001706)	51	6	0.23	+	26.62	1.86e-07	3.14e-05
morphogenesis of an epithelial sheet (GO:0002011)	51	6	0.23	+	26.62	1.86e-07	3.1e-05
regulation of signal transduction (GO:0009966)	2975	33	13.15	+	2.51	2.21e-07	3.65e-05
epiboly involved in wound healing (GO:0090505)	28	5	0.12	+	40.4	3.18e-07	5.19e-05
wound healing, spreading of cells (GO:0044319)	28	5	0.12	+	40.4	3.18e-07	5.14e-05
collagen metabolic process (GO:0032963)	57	6	0.25	+	23.82	3.41e-07	5.46e-05
embryonic morphogenesis (GO:0048598)	586	14	2.59	+	5.41	3.52e-07	5.57e-05
cellular response to transforming growth factor beta stimulus (GO:0071560)	144	8	0.64	+	12.57	3.59e-07	5.63e-05
epiboly (GO:0090504)	29	5	0.13	+	39.01	3.71e-07	5.76e-05
regulation of cell communication (GO:0010646)	3342	35	14.77	+	2.37	4.07e-07	6.26e-05
negative regulation of cell death (GO:0060548)	1006	18	4.45	+	4.05	4.23e-07	6.44e-05
negative regulation of developmental process (GO:0051093)	898	17	3.97	+	4.28	4.33e-07	6.52e-05
regulation of signaling (GO:0023051)	3355	35	14.83	+	2.36	4.34e-07	6.47e-05
cellular process (GO:0009987)	15176	86	67.08	+	1.28	4.86e-07	7.19e-05
muscle cell development (GO:0055001)	155	8	0.69	+	11.68	6.12e-07	8.96e-05
positive regulation of signal transduction (GO:0009967)	1529	22	6.76	+	3.26	7.03e-07	0.000102
negative regulation of cell migration (GO:0030336)	286	10	1.26	+	7.91	7.17e-07	0.000103
epithelium development (GO:0060429)	1054	18	4.66	+	3.86	8.22e-07	0.000117
response to organic substance (GO:0010033)	2683	30	11.86	+	2.53	8.58e-07	0.000121
response to amino acid (GO:0043200)	112	7	0.5	+	14.14	9.49e-07	0.000133
peptide cross-linking (GO:0018149)	36	5	0.16	+	31.42	9.76e-07	0.000135
positive regulation of developmental process (GO:0051094)	1314	20	5.81	+	3.44	1.07e-06	0.000148
cellular response to amino acid stimulus (GO:0071230)	72	6	0.32	+	18.85	1.22e-06	0.000167
regulation of apoptotic process (GO:0042981)	1456	21	6.44	+	3.26	1.29e-06	0.000174
response to stimulus (GO:0050896)	8096	59	35.78	+	1.65	1.34e-06	0.000179
negative regulation of catalytic activity (GO:0043086)	771	15	3.41	+	4.4	1.62e-06	0.000216
regulation of protein phosphorylation (GO:0001932)	1108	18	4.9	+	3.68	1.66e-06	0.000219
regulation of multicellular organismal development (GO:2000026)	1356	20	5.99	+	3.34	1.73e-06	0.000227
regulation of programmed cell death (GO:0043067)	1484	21	6.56	+	3.2	1.74e-06	0.000225
cell adhesion mediated by integrin (GO:0033627)	41	5	0.18	+	27.59	1.76e-06	0.000225
regulation of collagen metabolic process (GO:0010712)	41	5	0.18	+	27.59	1.76e-06	0.000224
endoderm development (GO:0007492)	77	6	0.34	+	17.63	1.77e-06	0.000223
positive regulation of cell death (GO:0010942)	579	13	2.56	+	5.08	1.89e-06	0.000236
regulation of osteoblast differentiation (GO:0045667)	126	7	0.56	+	12.57	2.01e-06	0.000249
positive regulation of cell-substrate adhesion (GO:0010811)	127	7	0.56	+	12.47	2.11e-06	0.00026
response to acid chemical (GO:0001101)	128	7	0.57	+	12.37	2.22e-06	0.000271
regulation of phosphorylation (GO:0042325)	1255	19	5.55	+	3.43	2.27e-06	0.000276
cellular response to acid chemical (GO:0071229)	81	6	0.36	+	16.76	2.33e-06	0.000281
regulation of fibrinolysis (GO:0051917)	18	4	0.08	+	50.28	2.42e-06	0.000289
positive regulation of response to stimulus (GO:0048584)	2213	26	9.78	+	2.66	2.46e-06	0.000292
regulation of catalytic activity (GO:0050790)	2364	27	10.45	+	2.58	2.52e-06	0.000296
muscle cell differentiation (GO:0042692)	256	9	1.13	+	7.95	2.55e-06	0.000298
negative regulation of signal transduction (GO:0009968)	1265	19	5.59	+	3.4	2.55e-06	0.000296
response to oxygen-containing compound (GO:1901700)	1524	21	6.74	+	3.12	2.64e-06	0.000304
positive regulation of apoptotic process (GO:0043065)	505	12	2.23	+	5.38	2.76e-06	0.000315
osteoblast differentiation (GO:0001649)	136	7	0.6	+	11.65	3.25e-06	0.000369
embryo development (GO:0009790)	1044	17	4.61	+	3.68	3.28e-06	0.00037
cell surface receptor signaling pathway (GO:0007166)	2106	25	9.31	+	2.69	3.41e-06	0.000381
regulation of response to stimulus (GO:0048583)	4001	37	17.68	+	2.09	3.42e-06	0.000381
positive regulation of programmed cell death (GO:0043068)	517	12	2.29	+	5.25	3.49e-06	0.000385
regulation of protein modification process (GO:0031399)	1558	21	6.89	+	3.05	3.72e-06	0.000408
positive regulation of cell communication (GO:0010647)	1693	22	7.48	+	2.94	3.72e-06	0.000405
positive regulation of signaling (GO:0023056)	1698	22	7.5	+	2.93	3.9e-06	0.000422
response to chemical (GO:0042221)	4035	37	17.83	+	2.07	3.96e-06	0.000425
regulation of cell differentiation (GO:0045595)	1568	21	6.93	+	3.03	4.11e-06	0.000438
regulation of transmembrane receptor protein serine/threonine kinase signaling pathway (GO:0090092)	273	9	1.21	+	7.46	4.24e-06	0.000448
cell-cell adhesion (GO:0098609)	540	12	2.39	+	5.03	5.38e-06	0.000566
positive regulation of stress fiber assembly (GO:0051496)	53	5	0.23	+	21.34	5.63e-06	0.000588
bone development (GO:0060348)	214	8	0.95	+	8.46	6.15e-06	0.000638
regulation of localization (GO:0032879)	2762	29	12.21	+	2.38	6.81e-06	0.000702
regulation of cellular component organization (GO:0051128)	2345	26	10.36	+	2.51	7.06e-06	0.000724
positive regulation of intracellular signal transduction (GO:1902533)	988	16	4.37	+	3.66	7.13e-06	0.000726
aorta development (GO:0035904)	56	5	0.25	+	20.2	7.23e-06	0.000731
muscle organ development (GO:0007517)	293	9	1.3	+	6.95	7.37e-06	0.00074
negative regulation of cell communication (GO:0010648)	1364	19	6.03	+	3.15	7.49e-06	0.000748
regulation of osteoblast proliferation (GO:0033688)	25	4	0.11	+	36.2	7.66e-06	0.00076
negative regulation of signaling (GO:0023057)	1370	19	6.06	+	3.14	7.97e-06	0.000785
negative regulation of cellular response to growth factor stimulus (GO:0090288)	102	6	0.45	+	13.31	8.2e-06	0.000803
regulation of response to stress (GO:0080134)	1374	19	6.07	+	3.13	8.3e-06	0.000808
negative regulation of apoptotic process (GO:0043066)	887	15	3.92	+	3.83	8.65e-06	0.000837
regulation of BMP signaling pathway (GO:0030510)	103	6	0.46	+	13.18	8.65e-06	0.000832
positive regulation of focal adhesion assembly (GO:0051894)	26	4	0.11	+	34.81	8.81e-06	0.000842
negative regulation of cell-substrate adhesion (GO:0010812)	60	5	0.27	+	18.85	9.9e-06	0.000941
protein hydroxylation (GO:0018126)	27	4	0.12	+	33.52	1.01e-05	0.000952
positive regulation of angiogenesis (GO:0045766)	163	7	0.72	+	9.72	1.02e-05	0.000953
positive regulation of vasculature development (GO:1904018)	163	7	0.72	+	9.72	1.02e-05	0.000947
cell development (GO:0048468)	1668	21	7.37	+	2.85	1.06e-05	0.00098
positive regulation of wound healing (GO:0090303)	61	5	0.27	+	18.55	1.07e-05	0.000984
regulation of phosphate metabolic process (GO:0019220)	1401	19	6.19	+	3.07	1.09e-05	0.001
negative regulation of programmed cell death (GO:0043069)	905	15	4	+	3.75	1.09e-05	0.000997
regulation of phosphorus metabolic process (GO:0051174)	1403	19	6.2	+	3.06	1.11e-05	0.00101
striated muscle cell development (GO:0055002)	62	5	0.27	+	18.25	1.15e-05	0.00104
positive regulation of actin filament bundle assembly (GO:0032233)	63	5	0.28	+	17.96	1.24e-05	0.00111
basement membrane organization (GO:0071711)	29	4	0.13	+	31.21	1.3e-05	0.00116
bone trabecula formation (GO:0060346)	8	3	0.04	+	84.84	1.33e-05	0.00117
regulation of focal adhesion assembly (GO:0051893)	64	5	0.28	+	17.68	1.33e-05	0.00117
regulation of cell-substrate junction assembly (GO:0090109)	64	5	0.28	+	17.68	1.33e-05	0.00116
positive regulation of cellular component organization (GO:0051130)	1047	16	4.63	+	3.46	1.45e-05	0.00127
regulation of intracellular signal transduction (GO:1902531)	1704	21	7.53	+	2.79	1.46e-05	0.00126
positive regulation of molecular function (GO:0044093)	1569	20	6.93	+	2.88	1.5e-05	0.0013
positive regulation of cell-substrate junction organization (GO:0150117)	31	4	0.14	+	29.19	1.65e-05	0.00142
positive regulation of osteoblast differentiation (GO:0045669)	68	5	0.3	+	16.64	1.75e-05	0.00149
collagen biosynthetic process (GO:0032964)	9	3	0.04	+	75.42	1.76e-05	0.00149
peptidyl-lysine hydroxylation (GO:0017185)	9	3	0.04	+	75.42	1.76e-05	0.00148
regulation of cell-substrate junction organization (GO:0150116)	69	5	0.3	+	16.4	1.87e-05	0.00157
response to organonitrogen compound (GO:0010243)	950	15	4.2	+	3.57	1.92e-05	0.0016
regulation of cell-matrix adhesion (GO:0001952)	122	6	0.54	+	11.13	2.17e-05	0.0018
positive regulation of response to wounding (GO:1903036)	73	5	0.32	+	15.5	2.42e-05	0.002
negative regulation of response to stimulus (GO:0048585)	1622	20	7.17	+	2.79	2.42e-05	0.00199
positive regulation of multicellular organismal process (GO:0051240)	1491	19	6.59	+	2.88	2.58e-05	0.00211
bone trabecula morphogenesis (GO:0061430)	11	3	0.05	+	61.71	2.9e-05	0.00235
striated muscle cell differentiation (GO:0051146)	195	7	0.86	+	8.12	3.09e-05	0.0025
positive regulation of osteoblast proliferation (GO:0033690)	12	3	0.05	+	56.56	3.61e-05	0.0029
collagen-activated tyrosine kinase receptor signaling pathway (GO:0038063)	12	3	0.05	+	56.56	3.61e-05	0.00289
elastic fiber assembly (GO:0048251)	12	3	0.05	+	56.56	3.61e-05	0.00287
regulation of transforming growth factor beta production (GO:0071634)	39	4	0.17	+	23.21	3.8e-05	0.00301
negative regulation of cell differentiation (GO:0045596)	662	12	2.93	+	4.1	3.9e-05	0.00308
negative regulation of molecular function (GO:0044092)	1141	16	5.04	+	3.17	4.08e-05	0.0032
regulation of smooth muscle cell proliferation (GO:0048660)	138	6	0.61	+	9.84	4.21e-05	0.00328
regulation of biological process (GO:0050789)	11735	71	51.87	+	1.37	4.26e-05	0.00331
regulation of MAPK cascade (GO:0043408)	669	12	2.96	+	4.06	4.32e-05	0.00333
wound healing, spreading of epidermal cells (GO:0035313)	13	3	0.06	+	52.21	4.43e-05	0.0034
regulation of cellular process (GO:0050794)	11275	69	49.83	+	1.38	4.77e-05	0.00364
response to stress (GO:0006950)	3400	31	15.03	+	2.06	4.84e-05	0.00368
regulation of body fluid levels (GO:0050878)	375	9	1.66	+	5.43	4.9e-05	0.00371
positive regulation of cellular process (GO:0048522)	5740	44	25.37	+	1.73	5.07e-05	0.00382
positive regulation of hydrolase activity (GO:0051345)	575	11	2.54	+	4.33	5.24e-05	0.00393
positive regulation of chemotaxis (GO:0050921)	144	6	0.64	+	9.43	5.29e-05	0.00395
positive regulation of fibroblast migration (GO:0010763)	14	3	0.06	+	48.48	5.36e-05	0.00398
positive regulation of leukocyte migration (GO:0002687)	145	6	0.64	+	9.36	5.49e-05	0.00406
response to nitrogen compound (GO:1901698)	1046	15	4.62	+	3.24	5.71e-05	0.0042
response to lipid (GO:0033993)	813	13	3.59	+	3.62	6.45e-05	0.00473
regulation of leukocyte migration (GO:0002685)	220	7	0.97	+	7.2	6.48e-05	0.00472
regulation of stress fiber assembly (GO:0051492)	91	5	0.4	+	12.43	6.58e-05	0.00478
Unclassified (UNCLASSIFIED)	2730	1	12.07	-	0.08	6.64e-05	0.0048
biological_process (GO:0008150)	17859	90	78.93	+	1.14	6.64e-05	0.00477
positive regulation of phosphorylation (GO:0042327)	823	13	3.64	+	3.57	7.29e-05	0.00522
muscle tissue development (GO:0060537)	306	8	1.35	+	5.92	7.36e-05	0.00525
negative regulation of cell population proliferation (GO:0008285)	711	12	3.14	+	3.82	7.66e-05	0.00543
cellular response to endogenous stimulus (GO:0071495)	1078	15	4.76	+	3.15	7.99e-05	0.00564
positive regulation of biological process (GO:0048518)	6255	46	27.65	+	1.66	8.02e-05	0.00564
regulation of extrinsic apoptotic signaling pathway via death domain receptors (GO:1902041)	48	4	0.21	+	18.85	8.08e-05	0.00565
artery development (GO:0060840)	96	5	0.42	+	11.78	8.39e-05	0.00584
skeletal system morphogenesis (GO:0048705)	230	7	1.02	+	6.89	8.49e-05	0.00589
enzyme-linked receptor protein signaling pathway (GO:0007167)	608	11	2.69	+	4.09	8.55e-05	0.0059
positive regulation of leukocyte chemotaxis (GO:0002690)	97	5	0.43	+	11.66	8.79e-05	0.00604
biological regulation (GO:0065007)	12469	73	55.11	+	1.32	8.85e-05	0.00606
collagen-activated signaling pathway (GO:0038065)	17	3	0.08	+	39.93	8.9e-05	0.00606
positive regulation of organelle organization (GO:0010638)	510	10	2.25	+	4.44	9.62e-05	0.00652
regulation of actomyosin structure organization (GO:0110020)	99	5	0.44	+	11.43	9.64e-05	0.00651
regulation of plasminogen activation (GO:0010755)	18	3	0.08	+	37.71	0.000104	0.00696
response to oxygen levels (GO:0070482)	326	8	1.44	+	5.55	0.000113	0.00757
positive regulation of protein phosphorylation (GO:0001934)	742	12	3.28	+	3.66	0.000114	0.00759
protein deamination (GO:0018277)	2	2	0.01	+	> 100	0.000114	0.00759
hydroxylysine biosynthetic process (GO:0046947)	2	2	0.01	+	> 100	0.000114	0.00756
hydroxylysine metabolic process (GO:0046946)	2	2	0.01	+	> 100	0.000114	0.00752
response to hydrogen peroxide (GO:0042542)	103	5	0.46	+	10.98	0.000115	0.00755
negative regulation of bone remodeling (GO:0046851)	19	3	0.08	+	35.72	0.000119	0.0078
response to reactive oxygen species (GO:0000302)	168	6	0.74	+	8.08	0.00012	0.00781
regulation of actin filament bundle assembly (GO:0032231)	104	5	0.46	+	10.88	0.00012	0.00779
cellular component assembly involved in morphogenesis (GO:0010927)	104	5	0.46	+	10.88	0.00012	0.00776
gland morphogenesis (GO:0022612)	105	5	0.46	+	10.77	0.000126	0.00807
cardiac muscle tissue development (GO:0048738)	170	6	0.75	+	7.99	0.000128	0.00818
viral entry into host cell (GO:0046718)	106	5	0.47	+	10.67	0.000131	0.00835
negative regulation of BMP signaling pathway (GO:0030514)	56	4	0.25	+	16.16	0.000142	0.00899
entry into host (GO:0044409)	108	5	0.48	+	10.47	0.000143	0.00901
heart development (GO:0007507)	538	10	2.38	+	4.21	0.000148	0.00929
lung development (GO:0030324)	175	6	0.77	+	7.76	0.000149	0.00934
striated muscle tissue development (GO:0014706)	175	6	0.77	+	7.76	0.000149	0.0093
blood coagulation (GO:0007596)	175	6	0.77	+	7.76	0.000149	0.00926
positive regulation of cell-matrix adhesion (GO:0001954)	57	4	0.25	+	15.88	0.000151	0.00936
actomyosin structure organization (GO:0031032)	110	5	0.49	+	10.28	0.000155	0.00955
coagulation (GO:0050817)	177	6	0.78	+	7.67	0.000158	0.00972
positive regulation of supramolecular fiber organization (GO:1902905)	177	6	0.78	+	7.67	0.000158	0.00968
negative regulation of multicellular organismal process (GO:0051241)	1020	14	4.51	+	3.11	0.000163	0.00996
respiratory tube development (GO:0030323)	179	6	0.79	+	7.58	0.000168	0.0102
hemostasis (GO:0007599)	180	6	0.8	+	7.54	0.000173	0.0105
cellular response to chemical stimulus (GO:0070887)	2599	25	11.49	+	2.18	0.00018	0.0108
positive regulation of phosphorus metabolic process (GO:0010562)	904	13	4	+	3.25	0.000183	0.011
positive regulation of phosphate metabolic process (GO:0045937)	904	13	4	+	3.25	0.000183	0.0109
negative regulation of endodermal cell differentiation (GO:1903225)	3	2	0.01	+	> 100	0.00019	0.0113
myofibril assembly (GO:0030239)	61	4	0.27	+	14.84	0.000193	0.0115
trabecula formation (GO:0060343)	23	3	0.1	+	29.51	0.000199	0.0118
positive regulation of catalytic activity (GO:0043085)	1180	15	5.22	+	2.88	0.000213	0.0126
regulation of smooth muscle cell migration (GO:0014910)	63	4	0.28	+	14.37	0.000218	0.0128
negative regulation of tissue remodeling (GO:0034104)	24	3	0.11	+	28.28	0.000223	0.0131
negative regulation of smooth muscle cell migration (GO:0014912)	24	3	0.11	+	28.28	0.000223	0.013
regulation of ossification (GO:0030278)	121	5	0.53	+	9.35	0.000237	0.0138
cellular response to organic substance (GO:0071310)	2014	21	8.9	+	2.36	0.000241	0.014
cytokine production (GO:0001816)	25	3	0.11	+	27.15	0.000249	0.0144
odontogenesis (GO:0042476)	123	5	0.54	+	9.2	0.000255	0.0147
glycosaminoglycan metabolic process (GO:0030203)	123	5	0.54	+	9.2	0.000255	0.0146
positive regulation of epithelial cell proliferation (GO:0050679)	194	6	0.86	+	7	0.000256	0.0146
response to estradiol (GO:0032355)	125	5	0.55	+	9.05	0.000274	0.0156
aorta smooth muscle tissue morphogenesis (GO:0060414)	4	2	0.02	+	> 100	0.000284	0.0161
regulation of collagen catabolic process (GO:0010710)	4	2	0.02	+	> 100	0.000284	0.016
regulation of leukocyte chemotaxis (GO:0002688)	126	5	0.56	+	8.98	0.000284	0.016
regulation of cell junction assembly (GO:1901888)	199	6	0.88	+	6.82	0.000292	0.0163
respiratory system development (GO:0060541)	199	6	0.88	+	6.82	0.000292	0.0163
regulation of blood coagulation (GO:0030193)	69	4	0.3	+	13.12	0.000303	0.0168
regulation of biological quality (GO:0065008)	3730	31	16.49	+	1.88	0.000305	0.0169
positive regulation of MAPK cascade (GO:0043410)	481	9	2.13	+	4.23	0.000307	0.0169
muscle tissue morphogenesis (GO:0060415)	70	4	0.31	+	12.93	0.000319	0.0175
negative regulation of cell adhesion (GO:0007162)	287	7	1.27	+	5.52	0.000319	0.0175
cell junction organization (GO:0034330)	487	9	2.15	+	4.18	0.000335	0.0183
regulation of hemostasis (GO:1900046)	71	4	0.31	+	12.75	0.000336	0.0183
regulation of cartilage development (GO:0061035)	71	4	0.31	+	12.75	0.000336	0.0182
myoblast differentiation (GO:0045445)	28	3	0.12	+	24.24	0.000339	0.0183
regulation of cell activation (GO:0050865)	722	11	3.19	+	3.45	0.00037	0.0199
positive regulation of small GTPase mediated signal transduction (GO:0051057)	73	4	0.32	+	12.4	0.000372	0.0199
aminoglycan metabolic process (GO:0006022)	134	5	0.59	+	8.44	0.000373	0.02
regulation of coagulation (GO:0050818)	74	4	0.33	+	12.23	0.00039	0.0208
regulation of endodermal cell differentiation (GO:1903224)	5	2	0.02	+	90.5	0.000396	0.0211
positive regulation of mesenchymal stem cell proliferation (GO:1902462)	5	2	0.02	+	90.5	0.000396	0.021
regulation of mesenchymal stem cell proliferation (GO:1902460)	5	2	0.02	+	90.5	0.000396	0.0209
transforming growth factor beta production (GO:0071604)	5	2	0.02	+	90.5	0.000396	0.0208
convergent extension involved in axis elongation (GO:0060028)	5	2	0.02	+	90.5	0.000396	0.0208
positive regulation of hepatic stellate cell activation (GO:2000491)	5	2	0.02	+	90.5	0.000396	0.0207
peptidyl-lysine oxidation (GO:0018057)	5	2	0.02	+	90.5	0.000396	0.0206
melanocyte proliferation (GO:0097325)	5	2	0.02	+	90.5	0.000396	0.0206
movement in host environment (GO:0052126)	136	5	0.6	+	8.32	0.000399	0.0206
aorta morphogenesis (GO:0035909)	30	3	0.13	+	22.63	0.000409	0.0211
regulation of ERK1 and ERK2 cascade (GO:0070372)	300	7	1.33	+	5.28	0.000414	0.0213
chondrocyte differentiation (GO:0002062)	76	4	0.34	+	11.91	0.00043	0.022
positive regulation of cell differentiation (GO:0045597)	863	12	3.81	+	3.15	0.000445	0.0227
positive regulation of cartilage development (GO:0061036)	31	3	0.14	+	21.9	0.000447	0.0227
cellular response to fibroblast growth factor stimulus (GO:0044344)	77	4	0.34	+	11.75	0.000451	0.0229
muscle organ morphogenesis (GO:0048644)	77	4	0.34	+	11.75	0.000451	0.0228
blood circulation (GO:0008015)	405	8	1.79	+	4.47	0.000474	0.0239
chemotaxis (GO:0006935)	513	9	2.27	+	3.97	0.000486	0.0244
taxis (GO:0042330)	515	9	2.28	+	3.95	0.000499	0.025
positive regulation of cellular protein metabolic process (GO:0032270)	1423	16	6.29	+	2.54	0.000501	0.025
regulation of fibroblast proliferation (GO:0048145)	80	4	0.35	+	11.31	0.000517	0.0257
cell-cell adhesion mediated by integrin (GO:0033631)	6	2	0.03	+	75.42	0.000527	0.0261
peptide cross-linking via chondroitin 4-sulfate glycosaminoglycan (GO:0019800)	6	2	0.03	+	75.42	0.000527	0.0261
regulation of chemotaxis (GO:0050920)	224	6	0.99	+	6.06	0.000538	0.0265
positive regulation of cell-cell adhesion (GO:0022409)	314	7	1.39	+	5.04	0.00054	0.0265
cardiac muscle cell differentiation (GO:0055007)	81	4	0.36	+	11.17	0.000541	0.0265
positive regulation of protein modification process (GO:0031401)	1015	13	4.49	+	2.9	0.000548	0.0268
negative regulation of transmembrane receptor protein serine/threonine kinase signaling pathway (GO:0090101)	147	5	0.65	+	7.7	0.000562	0.0273
negative regulation of apoptotic signaling pathway (GO:2001234)	227	6	1	+	5.98	0.000576	0.0279
muscle contraction (GO:0006936)	228	6	1.01	+	5.95	0.000589	0.0285
response to fibroblast growth factor (GO:0071774)	83	4	0.37	+	10.9	0.000591	0.0285
regulation of epithelial cell apoptotic process (GO:1904035)	83	4	0.37	+	10.9	0.000591	0.0284
morphogenesis of embryonic epithelium (GO:0016331)	149	5	0.66	+	7.59	0.000596	0.0286
biological process involved in interaction with host (GO:0051701)	150	5	0.66	+	7.54	0.000614	0.0293
tube formation (GO:0035148)	150	5	0.66	+	7.54	0.000614	0.0292
regulation of fibroblast migration (GO:0010762)	35	3	0.15	+	19.39	0.000622	0.0295
negative regulation of cellular metabolic process (GO:0031324)	2539	23	11.22	+	2.05	0.000653	0.0309
reproductive structure development (GO:0048608)	427	8	1.89	+	4.24	0.000666	0.0314
regulation of extrinsic apoptotic signaling pathway (GO:2001236)	153	5	0.68	+	7.39	0.00067	0.0315
heterotypic cell-cell adhesion (GO:0034113)	36	3	0.16	+	18.85	0.000672	0.0315
regulation of collagen biosynthetic process (GO:0032965)	36	3	0.16	+	18.85	0.000672	0.0314
cell-substrate junction assembly (GO:0007044)	36	3	0.16	+	18.85	0.000672	0.0313
positive regulation of transforming growth factor beta1 production (GO:0032914)	7	2	0.03	+	64.64	0.000676	0.0314
convergent extension involved in gastrulation (GO:0060027)	7	2	0.03	+	64.64	0.000676	0.0313
regulation of hepatic stellate cell activation (GO:2000489)	7	2	0.03	+	64.64	0.000676	0.0312
dentinogenesis (GO:0097187)	7	2	0.03	+	64.64	0.000676	0.0311
mesenchymal-epithelial cell signaling (GO:0060638)	7	2	0.03	+	64.64	0.000676	0.0311
reproductive system development (GO:0061458)	430	8	1.9	+	4.21	0.000696	0.0319
cellular response to oxygen-containing compound (GO:1901701)	1043	13	4.61	+	2.82	0.000704	0.0322
eye morphogenesis (GO:0048592)	155	5	0.69	+	7.3	0.000709	0.0323
cell-substrate junction organization (GO:0150115)	37	3	0.16	+	18.34	0.000724	0.0329
transforming growth factor beta receptor signaling pathway (GO:0007179)	89	4	0.39	+	10.17	0.00076	0.0344
cellular component assembly (GO:0022607)	2398	22	10.6	+	2.08	0.000811	0.0366
regulation of epithelial cell proliferation (GO:0050678)	337	7	1.49	+	4.7	0.000812	0.0366
neural tube development (GO:0021915)	160	5	0.71	+	7.07	0.000814	0.0366
negative regulation of nitrogen compound metabolic process (GO:0051172)	2399	22	10.6	+	2.07	0.000814	0.0365
regulation of stem cell proliferation (GO:0072091)	39	3	0.17	+	17.4	0.000836	0.0373
urogenital system development (GO:0001655)	339	7	1.5	+	4.67	0.00084	0.0374
glomerular mesangium development (GO:0072109)	8	2	0.04	+	56.56	0.000842	0.0374
platelet-derived growth factor receptor-beta signaling pathway (GO:0035791)	8	2	0.04	+	56.56	0.000842	0.0373
negative regulation of plasminogen activation (GO:0010757)	8	2	0.04	+	56.56	0.000842	0.0372
biological process involved in symbiotic interaction (GO:0044403)	245	6	1.08	+	5.54	0.000849	0.0374
neural tube closure (GO:0001843)	93	4	0.41	+	9.73	0.00089	0.0391
epithelial cell proliferation (GO:0050673)	94	4	0.42	+	9.63	0.000924	0.0405
regulation of epithelial to mesenchymal transition (GO:0010717)	94	4	0.42	+	9.63	0.000924	0.0404
tube closure (GO:0060606)	94	4	0.42	+	9.63	0.000924	0.0402
cellular response to stimulus (GO:0051716)	6479	44	28.64	+	1.54	0.000929	0.0403
positive regulation of protein metabolic process (GO:0051247)	1510	16	6.67	+	2.4	0.000944	0.0409
bleb assembly (GO:0032060)	9	2	0.04	+	50.28	0.00103	0.0443
negative regulation of extrinsic apoptotic signaling pathway (GO:2001237)	97	4	0.43	+	9.33	0.00103	0.0445
biomineral tissue development (GO:0031214)	98	4	0.43	+	9.23	0.00107	0.0461
primary neural tube formation (GO:0014020)	99	4	0.44	+	9.14	0.00111	0.0476
regulation of response to external stimulus (GO:0032101)	963	12	4.26	+	2.82	0.00115	0.049
apoptotic cell clearance (GO:0043277)	44	3	0.19	+	15.43	0.00116	0.0495
