# Supplementary material for: TP53mutation–associated and copy number–dependent KDM7A-DT expression affects DNA repair and promotes invasive breast cancer progression
Source: Research Square preprint supplement (doi:10.21203/rs.3.rs-1896103/v3), 2022-09-27
Supplement: Supplementary file 20 [file dc72301a64be712c31009299.xlsx]

## Sheet: ST15
Table S15. Gene distribution in common differentially expressed Hallmark gene sets pathways among KDM7A-DT overexpression (fibroblast cells MRC5) and knockdown breast cancer cells (T47D)
Table S15. Gene IDs of the unique and common genes represented in the same functional categories (Cancer Hallmark Genesets) for the exxpressed genes detected in the treated MRC5 and T47D cells.
Inflammatory Response					Oxidative Phosphorylation					Heme Metabolism					Estrogen Response Early					Estrogen Response Late					Tnfa Signaling Via Nfkb					Apoptosis					Interferon Alpha Response					Interferon Gamma Response					Myogenesis
34	21	6			51	135	33			52	79	28			33	77	14			44	73	14			41	31	9			34	22	3			45	28	16			66	36	16			42	47	16
MRC5	T47D	Common MRC5-T47D	Rho	p.adj	MRC5	T47D	Common MRC5-T47D	Rho	p.adj	MRC5	T47D	Common MRC5-T47D	Rho	p.adj	MRC5	T47D	Common MRC5-T47D	Rho	p.adj	MRC5	T47D	Common MRC5-T47D	Rho	p.adj	MRC5	T47D	Common MRC5-T47D	Rho	p.adj	MRC5	T47D	Common MRC5-T47D	Rho	p.adj	MRC5	T47D	Common MRC5-T47D	Rho	p.adj	MRC5	T47D	Common MRC5-T47D	Rho	p.adj	MRC5	T47D	Common MRC5-T47D	Rho	p.adj
SLC31A2	CCL2	IRF7	0.0579577	0.107463	MRPS12	POLR2F	AFG3L2	-0.0263716	0.493767	C3	TMEM9B	TMEM9B	-0.241797	3.03384e-13	TUBB2B	AR	ADD3	0.105997	0.00213248	SCARB1	TPBG	ACOX2	-0.0868876	0.0128688	LDLR	IFIT2	DUSP1	-0.0367222	0.327103	IGF2R	CD14	CD14	0.128969	0.000157935	TRAFD1	IFI27	IFI27	0.133426	9.04116e-05	DHX58	IFI27	IFI27	0.133426	9.04116e-05	MAPK12	TSC2	MAPK12	0.0602257	0.0932875
PCDH7	ABCA1	ITGA5	0.118893	0.000523684	MRPS30	NDUFB2	AIFM1	0.123709	0.000298564	MYL4	OSBP2	TRAK2	-0.0794238	0.0238331	SLC1A1	IGF1R	SNX24	-0.291477	6.24201e-19	STIL	ACOX2	CDC20	0.23361	2.04698e-12	MYC	CCL2	PPP1R15A	0.174928	2.01918e-07	TSPO	ANXA1	ANXA1	0.254787	1.2707e-14	GMPR	IFIT2	IFIT2	0.0866399	0.0131468	IFIT2	IFIT2	IFIT2	0.0866399	0.0131468	SMTN	ACSL1	SMTN	0.221826	2.70029e-11
EIF2AK2	CD14	CD14	0.128969	0.000157935	CYC1	ATP6V1C1	ATP5F1A	-0.159051	2.5217e-06	ASNS	ALAD	SIDT2	0.0273038	0.47787	HSPB8	FASN	CCND1	-0.379166	4.17716e-32	MOCS2	GINS2	ADD3	0.105997	0.00213248	SERPINB2	ABCA1	CEBPD	0.101091	0.00348329	CD14	PMAIP1	IRF1	0.13834	4.77111e-05	RNF31	SAMD9	ISG15	0.0875777	0.0121301	NUP93	CCL2	CCL2	0.232192	2.80568e-12	FHL1	RB1	MYO1C	-0.0225167	0.564503
SLC31A1	IRF7	IRF1	0.13834	4.77111e-05	PDK4	ATP5MC2	ATP5F1B	-0.0122245	0.762147	KAT2B	MPP1	CCND3	0.146389	1.6027e-05	SNX24	TPBG	FARP1	0.0533969	0.140699	ALDH3B1	LAMC2	CPE	-0.0799673	0.0228125	BHLHE40	DUSP1	NAMPT	0.316041	3.58881e-22	ERBB2	TNF				TRIM5	OASL	OAS1	0.0244847	0.527916	SOCS1	OASL	ISG15	0.0875777	0.0121301	BDKRB2	PLXNB2	DMPK	-0.12807	0.00017671
EMP3	CXCL8	CCL2	0.232192	2.80568e-12	GRPEL1	MRPS12	ATP5MC1	0.0155286	0.696647	NFE2L1	TRAK2	C3	0.209298	3.63903e-10	RHOBTB3	MLPH	TGM2	0.214587	1.23979e-10	NCOR2	CXCL12	CCND1	-0.379166	4.17716e-32	BMP2	ZC3H12A	NFIL3	0.372186	6.86808e-31	MGMT	CASP4				DHX58	ISG15	IRF7	0.0579577	0.107463	TAP1	ISG15	IFIT1	0.0160508	0.686914	MYO1C	OCEL1	NQO1	0.0418797	0.257497
PDPN	ITGA5	PLAUR	0.27523	5.87917e-17	HSPA9	MRPS11	ATP5MC2	-0.139074	4.34102e-05	BLVRB	CDC27	BLVRB	0.0351218	0.350461	PTGES	CXCL12	WFS1	-0.193128	8.1548e-09	ISG20	CDC20	FARP1	0.0533969	0.140699	YRDC	SIK1	CLCF1	-0.0298679	0.433572	FEZ1	ISG20				IFIT2	OAS1	ISG20	0.102721	0.00296316	IFIT3	IFIT1	IRF7	0.0579577	0.107463	COL15A1	TNNT1	TPD52L1	0.247397	7.91644e-14
TNFRSF1B	FZD5				UQCRFS1	NDUFS3	ATP5ME	0.0154938	0.697307	UBAC1	SIDT2	MGST3	0.116142	0.000715113	TPD52L1	ADD3	SYNGR1	-0.0690092	0.051955	IMPA2	ADD3	SGK1	0.201079	1.82093e-09	TRIB1	PPP1R15A	ATF3	0.199004	2.72044e-09	BCL2L2	CASP1				TAP1	IRF7	IRF9	-0.00842758	0.83809	CFB	CASP4	ISG20	0.102721	0.00296316	HSPB8	DMPK	ADCY9	-0.109395	0.00149517
LPAR1	NAMPT				NDUFS8	TIMM10	COX10	0.0306758	0.419943	GDE1	TFDP2	ATP6V0A1	-0.136387	6.17168e-05	SEMA3B	SLC22A5	NADSYN1	-0.0787808	0.0250523	CXCL14	SLC22A5	WFS1	-0.193128	8.1548e-09	IER3	TNF	JUN	0.0878671	0.0118366	TIMP2	BMF				IFIT3	ISG20	EPSTI1	0.207215	5.48429e-10	DDX58	IRF7	IRF9	-0.00842758	0.83809	DMPK	APP	GSN	0.161471	1.74963e-06
CD14	LAMP3				COX11	ATP5PD	CS	-0.105084	0.00234118	ABCB6	ICAM4	NNT	-0.254907	1.23268e-14	GLA	PDZK1	ADCY9	-0.109395	0.00149517	DNAJC1	PDZK1	SCARB1	0.0444522	0.226737	IRS2	CCN1	SQSTM1	-0.0845659	0.0156666	LGALS3	DDIT3				ISG20	IRF9	GBP2	0.190894	1.22574e-08	VCAM1	ISG20	EPSTI1	0.207215	5.48429e-10	SSPN	TEAD4	AGRN	0.0968659	0.00525644
SLC4A4	CD40				NDUFS3	UQCR10	CYC1	0.191909	1.02323e-08	CDR2	RAP1GAP	HAGH	-0.1588	2.62168e-06	ADCY9	SLC1A4	TPD52L1	0.247397	7.91644e-14	KIF20A	TST	IMPA2	0.219746	4.20855e-11	KYNU	GEM				TIMP1	HMOX1				USP18	CASP1	TRIM5	0.03753	0.315635	PML	IRF9	SOCS1	0.276565	4.07582e-17	MYL6B	CRAT	PLXNB2	0.117962	0.000582027
IRF7	KLF6				AFG3L2	ATP5ME	ECHS1	0.0544675	0.132324	TRIM58	BSG	TNS1	-0.000561714	0.990646	DHRS3	DHRS2	SLC2A1	0.137447	5.36993e-05	UGDH	ST14	TSPAN13	-0.190717	1.26509e-08	NAMPT	CEBPD				IRF1	GADD45A				PARP14	EPSTI1	DDX60	-0.067522	0.0575781	PFKP	CASP1	DDX60	-0.067522	0.0575781	DENND2B	DTNA	ATP6AP1	-0.122565	0.000341856
SLC11A2	IRF1				MRPS15	ETFA	GOT2	-0.1249	0.000259164	CAST	CCND3	CTNS	0.0483736	0.185411	SVIL	SNX24	OLFML3	0.0692871	0.0509214	ID2	SLC1A4	NCOR2	-0.196161	4.65878e-09	BTG1	PLPP3				GSN	IRF1				GBP2	LPAR6	IRF1	0.13834	4.77111e-05	ISG20	UPP1	IRF1	0.13834	4.77111e-05	NQO1	SYNGR2	EFS	0.203243	1.19636e-09
IL4R	PLAUR				IDH3B	TIMM9	IDH3B	0.107106	0.00190236	YPEL5	C3	PIGQ	-0.108439	0.00165365	TOB1	CLDN7	RHOBTB3	-0.0826173	0.0183805	SGK1	CPE	TPD52L1	0.247397	7.91644e-14	TIPARP	NAMPT				HSPB1	ATF3				PARP9	LAMP3	DHX58	-0.0890025	0.0107413	METTL7B	EPSTI1	HLA-G	0.107346	0.00185508	TPD52L1	AGRN	COL6A2	0.15699	3.44465e-06
BST2	BTG2				MRPS11	NDUFC1	LRPPRC	0.0138213	0.730709	RNF123	SLC66A2	UROS	0.0877081	0.0119988	DYNLT3	RAPGEFL1	NBL1	0.0655571	0.0657442	HSPB8	PRLR	NBL1	0.0655571	0.0657442	EGR2	NFIL3				ENO2	JUN				EIF2AK2	GBP2	MX1	0.128892	0.000159449	OAS2	SOCS1	DHX58	-0.0890025	0.0107413	ADCY9	NQO1	APP	0.15098	8.34755e-06
SELENOS	SGMS2				MFN2	ECH1	MDH2	0.242003	2.89339e-13	TNS1	BLVRB	H4C3	0.103984	0.0026129	HES1	CCND1				CDC20	DHRS2				EDN1	RELB				IFITM3	AIFM3				DDX60	TRIM5	HELZ2	0.0268827	0.485086	USP18	NAMPT	MX1	0.128892	0.000159449	SVIL	ATP6AP1	ITGB5	-0.0235393	0.545384
P2RX4	IRAK2				ECHS1	COX7C	MFN2	-0.015288	0.701398	ALDH6A1	TOP1	LRP10	-0.0420581	0.255203	MUC1	SLC7A5				ZFP36	RAPGEFL1				ATF3	TSC22D1				SOD2	TXNIP				PSME2	DDX60	TRAFD1	-0.00318353	0.941076	PARP14	CD40	HELZ2	0.0268827	0.485086	GSN	LARGE1	IGFBP7	0.0735208	0.0374791
AXL	HRH1				ATP5F1B	ACAA2	MRPL35	-0.139786	3.94492e-05	MOSPD1	HDGF	P4HA2	0.159902	2.21743e-06	IL6ST	UNC119				PTGES	CCND1				CEBPB	FUT4				CCND1	BTG2				IFI44L	TRIM26				EIF2AK2	DDX60				AGRN	CFD
CCL5	P2RX7				MRPL35	DLAT	MRPS11	0.0438754	0.233365	EPB41	MGST3	ENDOD1	0.102497	0.00303167	B4GALT1	ARL3				IDH2	DCXR				BCL6	GADD45A				NEDD9	SQSTM1				OAS1	IRF1				CFH	TRIM26				IGFBP3	SIRT2
TIMP1	LCP2				PDHX	UQCRC1	MRPS12	0.167795	6.49712e-07	EPOR	ATP6V0A1	HEBP1	-0.264999	9.09434e-16	OLFML3	SIAH2				COX6C	FGFR3				NR4A2	KLF6				ANXA1	BCL2L11				EPSTI1	HERC6				DDX60	IRF1				PLXNB2	MYO1C
IRF1	RGS16				SUPV3L1	COX7A2	MRPS15	0.131286	0.000118476	PRDX2	ADD1	GDE1	-0.0207131	0.597596	NBL1	CHPT1				TPD52L1	SLC7A5				NFIL3	CLCF1				IL6	FAS				TMEM140	TENT5A				PSME2	HLA-G				CDH13	COL6A2
TAPBP	HIF1A				MDH2	COX6C	MRPS22	0.161457	1.75292e-06	MGST3	BNIP3L	ALDH6A1	-0.171306	3.66762e-07	SYNGR1	OVOL2				TSPAN13	ARL3				JUN	DNAJB4				DCN	BCL10				IRF7	PLSCR1				IFI44L	HERC6				ATP6AP1	ITGB5
IL7R					NDUFA9	ATP5F1E	NDUFA9	0.190737	1.26083e-08	HEBP1	FBXO7	TENT5C	-0.0900926	0.00974967	CCND1	FARP1				CPE	SIAH2				PHLDA1	IRF1				APP	SC5D				WARS1	IFI30				SPPL2A	ZNFX1				PDLIM7	NOTCH1
SEMA4D					MRPS22	ATP5MG	NDUFS3	0.0315618	0.405406	MARCHF2	NNT	MAP2K3	0.229974	4.59443e-12	RPS6KA2	TGM2				SEMA3B	SLC2A8				PTGS2	ATF3				CD44					MOV10	DHX58				EPSTI1	PLSCR1				SGCD	VIPR1
ADM					LRPPRC	SLC25A5	NDUFS8	0.0498496	0.171375	MAP2K3	GMPS	ABCB6	0.0295849	0.438358	NADSYN1	GREB1				GLA	CHPT1				TGIF1	PLAUR				DAP					IL4R	TXNIP				IRF7	IFI30				EFS	ABLIM1
IL6					GOT2	IDH3G	NDUFV2	-0.0380602	0.308038	HAGH	RCL1	SLC2A1	0.137447	5.36993e-05	FARP1	ABCA3				TOB1	OVOL2				RHOB	IER2				CAV1					BST2	MX1				HLA-G	DHX58				MYH9	ITGB4
PLAUR					TOMM22	UQCRC2	OXA1L	0.0733034	0.0381039	SLC10A3	H1-0	UBAC1	0.0878609	0.0118425	WFS1	AKAP1				DYNLT3	FARP1				EIF1	JUN				GSTM1					SP110	HELZ2				SSPN	APOL6				COL6A2	CAMK2B
ITGA5					POLR2F	NDUFA4	PMPCA	0.0459019	0.210823	EIF2AK1	HAGH	PRDX2	-0.0990605	0.00425697	PLAAT3	WFS1				IL6ST	FABP5				PPP1R15A	MARCKS				IL1B					IRF1	TRAFD1				ST3GAL5	TXNIP				APP	ADCY9
LY6E					ISCU	ATP5PO	POLR2F	0.121587	0.000383231	CTNS	SEC14L1	MARCHF2	0.0355246	0.344402	MYOF	SYNGR1				NBL1	ABCA3				TNFAIP6	EFNA1				PEA15					PROCR	IFI44				WARS1	SECTM1				COL6A3	FXYD1
SERPINE1					TIMM9	HADHA	SDHA	0.250874	3.37579e-14	ENDOD1	MARK3				SLC2A1	IL17RB				PERP	SGK1				NFE2L2	KLF4				BGN					IFITM3					IFNAR2	PELI1				ITGB5	SLC6A8
CD82					NDUFV2	HADHB	SDHB	0.0757083	0.0317762	GCLM	TNS1				CD44	FLNB				CCND1	WFS1				FJX1	BTG2				LMNA					PSME1					TNFAIP3	MX1				CNN3	IGFBP7
IL1B					PMPCA	NDUFA2	TIMM10	0.106278	0.00207085	SNCA	CTNS				ADD3	SLC9A3R1				ACOX2	IL17RB				CDKN1A	SQSTM1				LUM					IRF9					IL4R	HELZ2				TPM2	SPDEF
F3					OXA1L	COX8A	TIMM9	0.00759997	0.854337	TMEM9B	PIGQ				FOS	CANT1				RPS6KA2	FLNB				ETS2					PDGFRB					LY6E					BST2	TRAFD1				AEBP1	SMTN
CCL2					COX10	UQCR11	TOMM70	-0.0207349	0.597359	SLC11A2	CPOX				TGM2	NADSYN1				TFPI2	SLC9A3R1				CLCF1					IGFBP6					HELZ2					RBCK1	IFI44				COL4A2	GSN
IFITM1					CS	NDUFS2				SELENBP1	SLC22A4					KCNK5				FARP1	PTGER3				SERPINB8					PLAT					CD47					CCL5	FAS				MYLK	PTP4A3
					SDHA	COX4I1				NNT	SMOX					P2RY2				WFS1	KCNK5				FOSL1										IFITM2					SP110	LCP2				CRYAB	TPD52L1
					MTRF1	VDAC2				H4C3	MARCHF8					SLC24A3				PLAAT3	LARGE1				CEBPD										IFI35					PSMB10	HIF1A				ITGB1	EFS
					SDHB	COX6B1				ATP6V0A1	SLC6A9					INHBB				MDK	LLGL2				SQSTM1										B2M					IRF1					COX7A1	MAPK12
					TIMM10	IDH2				CAT	BACH1					SCARB1				MYOF	SLC24A3				JAG1										UBE2L6					TAPBP					PPP1R3C	NAV2
					AIFM1	ACADVL				ARL2BP	UROS					ABAT				CD9	SCARB1				MAFF										LGALS3BP					MVP					IGFBP7	PSEN2
					ATP5MC2	ECI1				PIGQ	H4C3					TFF3				ATP2B4	IMPA2				KLF10										ISG15					IFITM3					COL3A1	GPX3
					CYCS	NDUFB5				CTSB	RAD23A					PAPSS2				CD44	TFF3				DUSP1										STAT2					IFIT1					TAGLN	SOD3
					ATP5MC1	CYB5R3				TRAK2	LRP10					LRIG1				ADD3	PAPSS2														C1S					STAT1					COL1A1	PC
					ABCB7	MRPS22				LAMP2	AGPAT4					NXT1				CAV1	NXT1														IFI27					SOD2						CACNG1
					HTRA2	ATP5F1B				OPTN	BCAM					SFN				FOS	SFN														MX1					C1R						BIN1
					IDH1	ECHS1				SLC2A1	PPOX					ABLIM1					TSPAN13														IFITM1					HLA-A						WWTR1
					DLST	MRPL34				UROS	E2F2					TJP3					CDC6																			MT2A						SH2B1
					ATP5ME	OXA1L				LRP10	BLVRA					ENDOD1					TJP3																			PSME1						EPHB3
					COX7A2L	NDUFA7				HBD	P4HA2					ELOVL5					SLC29A1																			IRF9
					TOMM70	RHOT1				SIDT2	ENDOD1					OLFM1					ELOVL5																			IL6
					ATP5F1A	LDHB				CCND3	NEK7					ISG20L2					PKP3																			LY6E
					COX6A1	ETFB				P4HA2	TCEA1					HR					OLFM1																			VAMP5
						MRPS15				TENT5C	MBOAT2					MED24					HR																			HELZ2
						NDUFB4					UCP2					ADCY9					RABEP1																			HLA-B
						NDUFB3					HEBP1					RAB31					RAB31																			IFITM2
						NDUFC2					GDE1					PRSS23					DLG5																			IFI35
						NDUFB8					ALDH6A1					MINDY1					PRSS23																			B2M
						BCKDHA					SLC6A8					THSD4					ITPK1																			UBE2L6
						NDUFS8					TENT5C					ITPK1					CALCR																			LGALS3BP
						SUCLG1					TSPAN5					CALCR					NMU																			HLA-DMA
						MFN2					PPP2R5B					FHL2					IGFBP4																			ISG15
						ATP5F1C					ALAS2					IGFBP4					NCOR2																			STAT2
						MGST3					PICALM					NCOR2					CLIC3																			C1S
						TIMM17A					MAP2K3					CLIC3					PDCD4																			IFI27
						NDUFB7					ABCB6					TPD52L1					ASS1																			CCL2
						NDUFS7					PGLS					SLC2A1					TPD52L1																			MX1
						CS					EZH1					NAV2					CELSR2																			FGL2
						UQCRB					SLC2A1					CELSR2					HMGCS2
						SDHB					HMBS					OLFML3					SCUBE2
						GPX4					UBAC1					RHOBTB3					XRCC3
						OPA1					PRDX2					KDM4B					HOMER2
						NDUFA5					IGSF3					CBFA2T3					NBL1
						TOMM70					DCAF10					PODXL					RET
						ATP5F1A					KLF3					NBL1					CISH
						ACO2					PSMD9					RET
						NDUFA3					PC					CISH
						NNT					BTRC					SYT12
						CYC1					RANBP10					GFRA1
						ATP5PB					KDM7A
						NDUFB1					MARCHF2
						COX17
						OGDH
						NDUFS4
						NDUFV2
						NDUFA8
						MTX2
						PMPCA
						HSD17B10
						SDHC
						ALAS1
						GLUD1
						FH
						AFG3L2
						ATP5MC1
						NDUFA9
						COX5B
						COX5A
						CYB5A
						IMMT
						SDHA
						TIMM8B
						ATP6AP1
						AIFM1
						DLD
						ATP1B1
						ATP6V0E1
						VDAC1
						SLC25A11
						POR
						MDH1
						NDUFS1
						MPC1
						SUCLA2
						MDH2
						ATP5MF
						PHB2
						COX7B
						ATP5F1D
						NQO2
						ATP6V1H
						IDH3B
						PDHA1
						COX10
						UQCRQ
						GOT2
						NDUFAB1
						LRPPRC
						GPI
						ETFDH
						SURF1
						ALDH6A1
						SLC25A6
						IDH3A
						MRPL35
						RHOT2
						CPT1A
[truncated: 5 more columns]
