# Supplementary material for: TP53mutation–associated and copy number–dependent KDM7A-DT expression affects DNA repair and promotes invasive breast cancer progression
Source: Research Square preprint supplement (doi:10.21203/rs.3.rs-1896103/v3), 2022-09-27
Supplement: Supplementary file 21 [file e2ae4912d7db69901259b6eb.xlsx]

## Sheet: st14
Table S14. Cancer Hallmark Geneset Enrichment Analysis for GO Terms and KEGG pathways in differential expressed genes after KDM7A-DT knock-down in breast cancer cells. Data was sorted by Groups, adjust. p-value and Up/Down regulation patterns
								(q was not used-delite?)
Regulation pattern	Group	ID	Description	GeneRatio	BgRatio	p-value	p.adjust	qvalue	geneID
Downregulated	Control untreated	hsa05135	Yersinia infection	16/290	137/8081	2.93587e-05	0.00642955	0.00525366	9138/10109/81873/10458/63916/9815/5605/5606/5600/6300/5595/4615/5585/5879/6195/10163
Downregulated	Control untreated	hsa04010	MAPK signaling pathway	24/290	294/8081	0.000136174	0.014911	0.012184	8912/1945/2065/2261/5605/5606/7786/4215/9064/5600/6300/5595/23542/9261/4137/4149/8569/4615/4791/255189/5568/5879/6195/57551
Downregulated	Control untreated	hsa04721	Synaptic vesicle cycle	10/290	78/8081	0.000439714	0.0284747	0.023267	160/161/535/527/245972/51606/1785/8775/10312/6844
Downregulated	Control untreated	hsa05131	Shigellosis	20/290	246/8081	0.000520087	0.0284747	0.023267	81/10109/81873/11335/8454/63916/2308/5600/6300/5595/4615/4636/10398/5879/57521/7094/10318/7188/10163/55062
Downregulated	Control untreated	hsa04142	Lysosome	13/290	128/8081	0.000653685	0.0286314	0.023395	20/23457/8906/535/527/245972/51606/1509/2548/2629/2760/23659/10312
Downregulated	Control untreated	GO:0045071	negative regulation of viral genome replication	9/572	59/18670	7.15854e-05	0.0376378	0.0344717	8815/5610/440275/10581/3609/22880/4938/84875/10318
Downregulated	Control untreated	GO:0048193	Golgi vesicle transport	26/572	368/18670	7.32899e-05	0.0376378	0.0344717	160/84364/400/403/254263/91949/84342/64764/1785/2621/127845/3064/3831/399687/8775/8774/340371/23760/81876/339122/51560/10427/6709/128637/6844/55062
Downregulated	Control untreated	GO:0019079	viral genome replication	13/572	122/18670	9.48593e-05	0.0376378	0.0344717	104/89849/8815/5610/440275/2621/10581/3609/22880/4938/84875/128637/10318
Downregulated	Control untreated	GO:0016236	macroautophagy	22/572	295/18670	0.000119665	0.0376378	0.0344717	89849/535/527/245972/51606/23274/2629/10013/3064/5595/340371/55968/5768/81876/10193/57521/8987/10312/25989/79720/55062/53349
Downregulated	Control untreated	GO:1901653	cellular response to peptide	26/572	385/18670	0.000152149	0.0376378	0.0344717	115/445/535/527/245972/51606/10458/1154/2101/2213/2308/2771/2950/3297/51274/23641/54741/4149/5106/5447/5568/5786/6772/6774/10312/6844
Downregulated	Control untreated	GO:0071375	cellular response to peptide hormone stimulus	23/572	321/18670	0.000153253	0.0376378	0.0344717	115/445/535/527/245972/51606/10458/1154/2101/2308/2771/2950/3297/54741/4149/5106/5447/5568/5786/6772/6774/10312/6844
Downregulated	Control untreated	GO:0045069	regulation of viral genome replication	11/572	95/18670	0.000154328	0.0376378	0.0344717	104/8815/5610/440275/10581/3609/22880/4938/84875/128637/10318
Downregulated	Control untreated	GO:1900024	regulation of substrate adhesion-dependent cell spreading	8/572	52/18670	0.000169478	0.0376378	0.0344717	81/10109/1785/91663/5879/6239/11078/201294
Downregulated	Control untreated	GO:0034976	response to endoplasmic reticulum stress	21/572	285/18670	0.00020019	0.0376378	0.0344717	578/64764/9820/65992/54788/3300/5610/440275/11160/26232/2213/80020/2907/64224/55666/5034/6818/9797/7094/64061/55062
Downregulated	Control untreated	GO:0051403	stress-activated MAPK cascade	21/572	286/18670	0.000210019	0.0376378	0.0344717	8454/5610/2213/2308/2873/2874/2950/4055/5605/5606/7786/4215/9064/5600/5595/23542/9261/5585/4920/57551/7477
Downregulated	Control untreated	GO:0006790	sulfur compound metabolic process	25/572	372/18670	0.00021833	0.0376378	0.0344717	32/80221/79369/8704/633/552900/79586/8534/9469/84188/2539/2639/2678/2950/64210/84245/4967/9061/51449/55066/6576/6484/6818/445329/8460
Downregulated	Control untreated	GO:0050792	regulation of viral process	17/572	208/18670	0.000239055	0.0376378	0.0344717	104/8815/5610/440275/3249/10581/3609/22880/4938/5034/84875/5430/51773/6772/128637/10318/79720
Downregulated	Control untreated	GO:0043901	negative regulation of multi-organism process	15/572	171/18670	0.00025646	0.0376378	0.0344717	100/8815/5610/440275/5654/10581/3609/22880/79671/55666/4938/84875/59307/6772/10318
Downregulated	Control untreated	GO:0010770	positive regulation of cell morphogenesis involved in differentiation	14/572	154/18670	0.000282639	0.0376378	0.0344717	10109/10458/9820/1785/1826/4137/91663/5361/23654/5879/6239/10507/11078/201294
Downregulated	Control untreated	GO:0031098	stress-activated protein kinase signaling cascade	22/572	315/18670	0.00030267	0.0376378	0.0344717	440193/8454/5610/2213/2308/2873/2874/2950/4055/5605/5606/7786/4215/9064/5600/5595/23542/9261/5585/4920/57551/7477
Downregulated	Control untreated	GO:0046165	alcohol biosynthetic process	15/572	175/18670	0.000329278	0.0376378	0.0344717	10449/32/8912/1181/1727/79947/1719/11160/2539/2629/3269/51477/5106/23007/5447
Downregulated	Control untreated	GO:0006914	autophagy	30/572	496/18670	0.000334488	0.0376378	0.0344717	89849/535/527/245972/51606/23274/1917/440275/2308/2629/10013/3064/10524/5595/4137/340371/55968/5768/81876/53917/10193/57521/6774/8987/10312/201292/25989/79720/55062/53349
Downregulated	Control untreated	GO:0061919	process utilizing autophagic mechanism	30/572	496/18670	0.000334488	0.0376378	0.0344717	89849/535/527/245972/51606/23274/1917/440275/2308/2629/10013/3064/10524/5595/4137/340371/55968/5768/81876/53917/10193/57521/6774/8987/10312/201292/25989/79720/55062/53349
Downregulated	Control untreated	GO:0031346	positive regulation of cell projection organization	25/572	383/18670	0.000338935	0.0376378	0.0344717	160/10109/10458/7401/57175/64764/9820/54849/1742/1785/1826/83715/3064/4137/23327/5064/5361/23654/5879/6239/10507/23064/8175/10163/23613
Downregulated	Control untreated	GO:0042119	neutrophil activation	30/572	498/18670	0.000357772	0.0376378	0.0344717	161/535/527/613/25798/338339/1265/8904/1509/1727/2213/2268/2548/2760/2950/10075/387921/5223/5777/5768/53917/5879/6709/8987/6813/10312/7077/11322/9725/201294
Downregulated	Control untreated	GO:0044843	cell cycle G1/S phase transition	21/572	298/18670	0.000365622	0.0376378	0.0344717	571/10498/8558/10263/58190/10217/8454/65992/1719/128239/25959/4149/4173/4582/11331/8554/5777/57521/85456/25946/79027
Downregulated	Control untreated	GO:0048545	response to steroid hormone	25/572	385/18670	0.000366277	0.0376378	0.0344717	20/21/445/790/10498/65992/2101/2308/2629/2950/10013/25959/10524/8648/9612/7376/5106/11331/8554/5467/6258/6382/10474/7349/7477
Downregulated	Control untreated	GO:0031667	response to nutrient levels	30/572	499/18670	0.000369944	0.0376378	0.0344717	32/100/445/10458/594/790/23274/5610/440275/2067/2308/2539/2621/2629/2771/2950/3297/25959/5595/4149/406912/8648/5106/5447/5467/57521/6772/7349/55062/53349
Downregulated	Control untreated	hsa04141	Protein processing in endoplasmic reticulum	15/290	171/8081	0.00120375	0.0392979	0.0321107	578/8454/54788/3300/5610/440275/26232/7841/55666/55968/5034/5589/6185/6238/10427
Downregulated	Control untreated	hsa05235	PD-L1 expression and PD-1 checkpoint pathway in cancer	10/290	89/8081	0.0012561	0.0392979	0.0321107	5605/5606/4215/5600/6300/5595/4615/5777/6772/6774
Downregulated	Control untreated	GO:0010769	regulation of cell morphogenesis involved in differentiation	21/572	301/18670	0.000417559	0.0398422	0.0364906	81/10109/10458/84446/9820/1785/1826/4137/91663/23327/5361/23654/5879/6239/6405/64218/10507/10501/11078/201294/65249
Downregulated	Control untreated	GO:0007030	Golgi organization	13/572	142/18670	0.000431304	0.0398422	0.0364906	400/91949/9820/1785/3064/5605/5595/399687/55666/55968/339122/128637/8674
Downregulated	Control untreated	GO:0022604	regulation of cell morphogenesis	29/572	484/18670	0.000486737	0.0398422	0.0364906	81/10109/10458/283149/84446/57175/9820/1742/1785/1826/2268/3249/4137/4343/91663/23327/5064/5361/23654/5879/6239/6405/64218/10507/10501/11078/201294/126374/65249
Downregulated	Control untreated	GO:0043312	neutrophil degranulation	29/572	485/18670	0.000503137	0.0398422	0.0364906	161/535/527/613/25798/338339/1265/8904/1509/1727/2268/2548/2760/2950/10075/387921/5223/5777/5768/53917/5879/6709/8987/6813/10312/7077/11322/9725/201294
Downregulated	Control untreated	GO:0010506	regulation of autophagy	22/572	327/18670	0.000504369	0.0398422	0.0364906	535/527/245972/51606/23274/1917/440275/2308/2629/10013/3064/10524/5595/4137/340371/5768/81876/10193/57521/6774/201292/25989
Downregulated	Control untreated	GO:0043903	regulation of symbiosis, encompassing mutualism through parasitism	17/572	222/18670	0.000509955	0.0398422	0.0364906	104/8815/5610/440275/3249/10581/3609/22880/4938/5034/84875/5430/51773/6772/128637/10318/79720
Downregulated	Control untreated	GO:0006575	cellular modified amino acid metabolic process	16/572	202/18670	0.000510797	0.0398422	0.0364906	445/1719/2539/2678/2950/3249/84245/5034/54681/51449/255189/5447/5625/347735/6472/376497
Downregulated	Control untreated	hsa05132	Salmonella infection	19/290	249/8081	0.00152396	0.03994	0.0326354	113146/10109/81873/578/1785/83658/63916/3831/5605/5606/5600/6300/5595/4615/4636/10398/5585/5879/83439
Downregulated	Control untreated	hsa04931	Insulin resistance	11/290	108/8081	0.00164137	0.03994	0.0326354	32/64764/2308/92579/7376/5106/5499/5792/6195/376497/6774
Downregulated	Control untreated	GO:0002283	neutrophil activation involved in immune response	29/572	488/18670	0.000555294	0.0408159	0.0373824	161/535/527/613/25798/338339/1265/8904/1509/1727/2268/2548/2760/2950/10075/387921/5223/5777/5768/53917/5879/6709/8987/6813/10312/7077/11322/9725/201294
Downregulated	Control untreated	GO:0006024	glycosaminoglycan biosynthetic process	11/572	110/18670	0.000558166	0.0408159	0.0373824	160/79369/8704/633/79586/8534/9469/2817/6382/6385/6484
Downregulated	Control untreated	hsa05110	Vibrio cholerae infection	7/290	50/8081	0.00189309	0.0414587	0.0338764	115/535/527/245972/51606/5568/10312
Downregulated	Control untreated	GO:1903900	regulation of viral life cycle	13/572	149/18670	0.000682594	0.0476496	0.0436413	104/8815/5610/440275/10581/3609/22880/4938/5034/84875/128637/10318/79720
Downregulated	Control untreated	GO:0006352	DNA-templated transcription, initiation	18/572	249/18670	0.000698925	0.0476496	0.0436413	56998/2101/2969/9330/9794/5595/9439/9862/81857/57106/7376/5430/5467/51773/6258/23064/9013/25937
Downregulated	Control untreated	GO:0071383	cellular response to steroid hormone stimulus	18/572	250/18670	0.00073228	0.0476496	0.0436413	445/10498/65992/2101/2308/2950/10013/25959/10524/8648/9612/7376/5106/11331/8554/5467/6258/10474
Downregulated	Control untreated	GO:0043900	regulation of multi-organism process	25/572	405/18670	0.000766024	0.0476496	0.0436413	100/104/8815/8912/5610/440275/3249/5654/10581/3609/5595/22880/79671/55666/4938/5034/84875/5430/54476/51773/59307/6772/128637/10318/79720
Downregulated	Control untreated	GO:0002446	neutrophil mediated immunity	29/572	499/18670	0.000789514	0.0476496	0.0436413	161/535/527/613/25798/338339/1265/8904/1509/1727/2268/2548/2760/2950/10075/387921/5223/5777/5768/53917/5879/6709/8987/6813/10312/7077/11322/9725/201294
Downregulated	Control untreated	GO:0016241	regulation of macroautophagy	14/572	171/18670	0.00081203	0.0476496	0.0436413	535/527/245972/51606/23274/2629/10013/3064/5595/340371/5768/81876/10193/57521
Downregulated	Control untreated	GO:0006023	aminoglycan biosynthetic process	11/572	115/18670	0.000812298	0.0476496	0.0436413	160/79369/8704/633/79586/8534/9469/2817/6382/6385/6484
Downregulated	Control untreated	GO:0071496	cellular response to external stimulus	22/572	339/18670	0.000814523	0.0476496	0.0436413	10458/578/23274/1265/5610/440275/2308/2621/2629/2950/3297/25959/4055/5595/4149/406912/4615/8648/5879/57521/55062/53349
Downregulated	Control untreated	GO:0044272	sulfur compound biosynthetic process	15/572	192/18670	0.000870743	0.0496961	0.0455156	32/79369/8704/633/79586/8534/9469/2639/2678/2950/84245/9061/55066/6576/6484
Upregulated	Control untreated	hsa05217	Basal cell carcinoma	3/22	63/8081	0.000625704	0.0437993	0.0309559	8321/4616/10912
Downregulated	Knockdown untreated	GO:0006790	sulfur compound metabolic process	52/914	372/18670	7.95542e-12	1.93317e-08	1.69492e-08	84320/122970/11332/2180/7915/411/22901/10331/654483/79586/8534/1312/1622/8694/83401/60481/79071/84188/2194/2539/2639/2678/2690/2879/2946/9446/2953/3141/3158/51144/7923/23479/56922/4259/84245/4482/4597/9054/4967/9061/9060/5096/51449/5164/6576/6482/6484/6818/6821/8460/10090/64132
Downregulated	Knockdown untreated	GO:0006732	coenzyme metabolic process	53/914	403/18670	5.22804e-11	6.35207e-08	5.56924e-08	8086/84320/122970/11332/2180/226/351/874/1528/1727/1622/51181/8694/1719/55526/83401/60481/79071/957/84188/2194/2348/2539/2584/2639/10243/9446/3098/3099/3141/3158/51144/7923/56922/4190/4191/84245/25902/4597/9054/348995/9688/4967/5092/5096/5164/23590/57107/6472/9962/6576/113235/7298
Downregulated	Knockdown untreated	GO:0045333	cellular respiration	31/914	193/18670	4.98827e-09	4.0405e-06	3.54255e-06	48/50/7915/55847/9377/1537/55526/2110/2271/3419/23479/4190/4191/4705/51079/4696/91942/4713/4715/4724/374291/4729/4967/6472/9016/83733/79085/6834/10131/440567/27089
Downregulated	Knockdown untreated	GO:0006575	cellular modified amino acid metabolic process	30/914	202/18670	5.50666e-08	3.34529e-05	2.93302e-05	26090/7915/445/548596/1159/1374/1384/10491/1719/2348/2539/2678/2806/2879/2946/2953/84245/25902/5034/54681/51449/255189/5447/5625/9791/347735/6472/376497/113235/7298
Downregulated	Knockdown untreated	GO:1901568	fatty acid derivative metabolic process	26/914	167/18670	1.62262e-07	7.88593e-05	6.91407e-05	11332/2180/622/8694/83401/60481/79071/2053/84188/2194/2639/2678/2879/3158/51144/7923/4048/5595/9261/4259/4282/255189/5730/22949/6576/10998
Downregulated	Knockdown untreated	GO:1901570	fatty acid derivative biosynthetic process	19/914	99/18670	2.77326e-07	8.39653e-05	7.36174e-05	2180/622/83401/60481/79071/84188/2194/2639/2678/3158/51144/7923/4048/4259/4282/255189/5730/6576/10998
Downregulated	Knockdown untreated	GO:0033865	nucleoside bisphosphate metabolic process	23/914	140/18670	3.10983e-07	8.39653e-05	7.36174e-05	84320/122970/11332/2180/1622/8694/83401/60481/79071/84188/2194/2639/3158/51144/7923/4597/4967/9061/9060/5164/6576/6818/8460
Downregulated	Knockdown untreated	GO:0033875	ribonucleoside bisphosphate metabolic process	23/914	140/18670	3.10983e-07	8.39653e-05	7.36174e-05	84320/122970/11332/2180/1622/8694/83401/60481/79071/84188/2194/2639/3158/51144/7923/4597/4967/9061/9060/5164/6576/6818/8460
Downregulated	Knockdown untreated	GO:0034032	purine nucleoside bisphosphate metabolic process	23/914	140/18670	3.10983e-07	8.39653e-05	7.36174e-05	84320/122970/11332/2180/1622/8694/83401/60481/79071/84188/2194/2639/3158/51144/7923/4597/4967/9061/9060/5164/6576/6818/8460
Downregulated	Knockdown untreated	GO:0015980	energy derivation by oxidation of organic compounds	35/914	285/18670	5.37581e-07	0.000130632	0.000114533	48/50/207/7915/801/55847/9377/1537/55526/2110/2271/3419/23479/4190/4191/4705/51079/4696/91942/4713/4715/4724/374291/4729/4967/5500/5834/6472/9016/83733/79085/6834/10131/440567/27089
Downregulated	Knockdown untreated	GO:0010038	response to metal ion	41/914	364/18670	6.06999e-07	0.000134092	0.000117566	18/48/207/351/445/23400/540/572/8912/801/595/1050/8895/1371/1528/1740/1742/955/2067/2539/2805/10243/2934/3485/3778/27345/5595/4331/4489/4520/5111/5530/2185/6284/6382/79085/6649/83849/9066/7020/706
Downregulated	Knockdown untreated	GO:0006637	acyl-CoA metabolic process	19/914	105/18670	7.19083e-07	0.000134413	0.000117848	84320/122970/11332/2180/1622/8694/83401/60481/79071/84188/2194/2639/3158/51144/7923/4597/4967/5164/6576
Downregulated	Knockdown untreated	GO:0035383	thioester metabolic process	19/914	105/18670	7.19083e-07	0.000134413	0.000117848	84320/122970/11332/2180/1622/8694/83401/60481/79071/84188/2194/2639/3158/51144/7923/4597/4967/5164/6576
Downregulated	Knockdown untreated	GO:0043648	dicarboxylic acid metabolic process	18/914	99/18670	1.30453e-06	0.000205932	0.000180553	122970/7915/445/1719/2271/2348/2678/2746/2805/2806/9380/4190/4191/25902/4967/5625/6472/113235
Downregulated	Knockdown untreated	GO:0009123	nucleoside monophosphate metabolic process	41/914	375/18670	1.31787e-06	0.000205932	0.000180553	8086/100/226/351/353/572/400916/9377/1537/1635/1716/55526/1740/957/56975/2584/3098/3099/3303/23479/4436/4705/51079/4696/4713/4715/4724/374291/4729/348995/9688/4967/5634/6472/79085/6834/706/7298/7371/440567/27089
Downregulated	Knockdown untreated	GO:0009141	nucleoside triphosphate metabolic process	40/914	362/18670	1.35593e-06	0.000205932	0.000180553	8086/100/226/351/572/400916/9377/1537/1716/55526/957/56975/2584/10243/3098/3099/3303/23479/4436/4705/51079/4696/4713/4715/4724/374291/4729/9054/348995/9688/4967/4976/6472/79085/6834/706/7298/7371/440567/27089
Downregulated	Knockdown untreated	GO:0009144	purine nucleoside triphosphate metabolic process	38/914	342/18670	2.17048e-06	0.000310252	0.000272016	8086/100/226/351/572/400916/9377/1537/1716/55526/957/56975/2584/10243/3098/3099/3303/23479/4436/4705/51079/4696/4713/4715/4724/374291/4729/9054/348995/9688/4967/4976/6472/79085/6834/706/440567/27089
Downregulated	Knockdown untreated	GO:0022900	electron transport chain	25/914	186/18670	4.46836e-06	0.000588473	0.00051595	8574/22977/7915/9377/1534/1528/1537/2110/2731/23479/4705/51079/4696/91942/4713/4715/4724/374291/4729/4835/5447/83733/6834/440567/27089
Downregulated	Knockdown untreated	GO:0051188	cofactor biosynthetic process	36/914	326/18670	4.60123e-06	0.000588473	0.00051595	8086/10058/11332/2180/226/351/1371/1719/55526/83401/60481/79071/957/2194/2584/2639/2678/10243/3098/3099/3145/51144/7923/326625/25902/9054/348995/9688/4967/5092/5164/23590/57107/6576/51629/706
Downregulated	Knockdown untreated	GO:0009161	ribonucleoside monophosphate metabolic process	38/914	354/18670	4.94025e-06	0.000592992	0.000519911	8086/100/226/351/353/572/400916/9377/1537/55526/1740/957/56975/2584/3098/3099/3303/23479/4436/4705/51079/4696/4713/4715/4724/374291/4729/348995/9688/4967/5634/6472/79085/6834/706/7371/440567/27089
Downregulated	Knockdown untreated	GO:0009199	ribonucleoside triphosphate metabolic process	37/914	341/18670	5.12462e-06	0.000592992	0.000519911	8086/226/351/572/400916/9377/1537/55526/957/56975/2584/10243/3098/3099/3303/23479/4436/4705/51079/4696/4713/4715/4724/374291/4729/9054/348995/9688/4967/4976/6472/79085/6834/706/7371/440567/27089
Downregulated	Knockdown untreated	GO:0044282	small molecule catabolic process	44/914	445/18670	7.79554e-06	0.000861053	0.000754937	18/122970/8309/8310/100/207/219/7915/4329/226/572/622/874/1374/1384/51181/55268/957/955/2110/2584/2639/2731/2746/2805/2806/3098/3099/3028/3613/3712/4041/56922/4245/4967/5092/5096/5106/51449/23659/5625/949/6472/6818
Downregulated	Knockdown untreated	GO:0009205	purine ribonucleoside triphosphate metabolic process	36/914	335/18670	8.50557e-06	0.000895657	0.000785276	8086/226/351/572/400916/9377/1537/55526/957/56975/2584/10243/3098/3099/3303/23479/4436/4705/51079/4696/4713/4715/4724/374291/4729/9054/348995/9688/4967/4976/6472/79085/6834/706/440567/27089
Downregulated	Knockdown untreated	GO:0046394	carboxylic acid biosynthetic process	45/914	462/18670	9.06795e-06	0.000895657	0.000785276	8086/18/122970/11332/8309/226/160/351/445/1382/1719/55526/83401/60481/79071/957/2053/2194/2264/2584/2678/2746/2805/2806/2879/3098/3099/51144/7923/4048/4259/4282/84245/25902/7376/348995/9688/4967/26031/255189/5730/5831/6472/10998/10090
Downregulated	Knockdown untreated	GO:0006066	alcohol metabolic process	38/914	364/18670	9.44534e-06	0.000895657	0.000785276	8574/219/351/8912/801/1050/1727/1595/123099/8694/79947/1719/10901/79071/2053/2194/2539/2584/51573/2805/3158/3613/3706/26119/8720/4597/5092/5106/51196/23007/5447/2185/6256/949/6713/6818/7108/158219
Downregulated	Knockdown untreated	GO:0016053	organic acid biosynthetic process	45/914	463/18670	9.58316e-06	0.000895657	0.000785276	8086/18/122970/11332/8309/226/160/351/445/1382/1719/55526/83401/60481/79071/957/2053/2194/2264/2584/2678/2746/2805/2806/2879/3098/3099/51144/7923/4048/4259/4282/84245/25902/7376/348995/9688/4967/26031/255189/5730/5831/6472/10998/10090
Downregulated	Knockdown untreated	GO:0009167	purine ribonucleoside monophosphate metabolic process	36/914	340/18670	1.18161e-05	0.00106345	0.000932389	8086/100/226/351/353/572/400916/9377/1537/55526/1740/957/56975/2584/3098/3099/3303/23479/4436/4705/51079/4696/4713/4715/4724/374291/4729/348995/9688/4967/6472/79085/6834/706/440567/27089
Downregulated	Knockdown untreated	GO:0009126	purine nucleoside monophosphate metabolic process	36/914	341/18670	1.26059e-05	0.00109401	0.000959186	8086/100/226/351/353/572/400916/9377/1537/55526/1740/957/56975/2584/3098/3099/3303/23479/4436/4705/51079/4696/4713/4715/4724/374291/4729/348995/9688/4967/6472/79085/6834/706/440567/27089
Downregulated	Knockdown untreated	GO:0046034	ATP metabolic process	33/914	305/18670	1.73663e-05	0.00145518	0.00127584	8086/226/351/572/400916/9377/1537/55526/957/56975/2584/3098/3099/3303/23479/4436/4705/51079/4696/4713/4715/4724/374291/4729/348995/9688/4967/6472/79085/6834/706/440567/27089
Downregulated	Knockdown untreated	GO:0033866	nucleoside bisphosphate biosynthetic process	13/914	68/18670	2.18367e-05	0.00165823	0.00145387	11332/2180/83401/60481/79071/2194/2639/51144/7923/9061/9060/5164/6576
Downregulated	Knockdown untreated	GO:0034030	ribonucleoside bisphosphate biosynthetic process	13/914	68/18670	2.18367e-05	0.00165823	0.00145387	11332/2180/83401/60481/79071/2194/2639/51144/7923/9061/9060/5164/6576
Downregulated	Knockdown untreated	GO:0034033	purine nucleoside bisphosphate biosynthetic process	13/914	68/18670	2.18367e-05	0.00165823	0.00145387	11332/2180/83401/60481/79071/2194/2639/51144/7923/9061/9060/5164/6576
Downregulated	Knockdown untreated	GO:0044272	sulfur compound biosynthetic process	24/914	192/18670	2.37311e-05	0.00174747	0.00153211	2180/10331/79586/8534/83401/60481/79071/2194/2639/2678/2946/9446/51144/7923/4259/84245/9061/9060/5164/6576/6482/6484/10090/64132
Downregulated	Knockdown untreated	GO:0009108	coenzyme biosynthetic process	29/914	261/18670	3.38895e-05	0.0024221	0.0021236	8086/11332/2180/226/351/1719/55526/83401/60481/79071/957/2194/2584/2639/10243/3098/3099/51144/7923/25902/9054/348995/9688/4967/5092/5164/23590/57107/6576
Downregulated	Knockdown untreated	hsa04810	Regulation of actin cytoskeleton	30/489	218/8081	1.79489e-05	0.00260825	0.0020988	71/81/10552/10109/81873/10458/1072/23191/81624/2245/2261/2264/2768/2934/128239/3691/3693/3985/5605/5595/10398/5062/10298/5216/375189/5500/5747/5829/5879/5880
Downregulated	Knockdown untreated	hsa01200	Carbon metabolism	20/489	118/8081	2.31844e-05	0.00260825	0.0020988	48/50/8310/4329/226/2271/2539/2731/2746/2805/2806/3098/3099/3419/4190/4191/4967/5096/5634/6472
Downregulated	Knockdown untreated	GO:2000058	regulation of ubiquitin-dependent protein catabolic process	20/914	149/18670	4.01292e-05	0.00278611	0.00244275	207/54467/6790/10134/1050/23274/150684/26263/10755/2768/3303/9683/55872/8554/5747/2185/5886/5887/9349/7874
Downregulated	Knockdown untreated	GO:0140053	mitochondrial gene expression	21/914	162/18670	4.39431e-05	0.0029044	0.00254646	400916/60528/26284/3028/10128/54948/51073/64975/51642/128308/51649/23107/28957/65993/64965/55005/6472/57570/26995/10102/7284
Downregulated	Knockdown untreated	GO:0043161	proteasome-mediated ubiquitin-dependent protein catabolic process	40/914	419/18670	4.43873e-05	0.0029044	0.00254646	207/267/54467/6790/10134/8945/1050/23274/150684/54788/11124/115290/26232/26263/80020/10755/2768/7184/3303/9928/9683/55666/55968/55872/8554/5527/5690/5693/5717/9861/9232/5886/5887/54476/81858/114088/11065/51465/9354/7874
Downregulated	Knockdown untreated	GO:0048732	gland development	41/914	434/18670	4.54186e-05	0.0029044	0.00254646	50/100/207/353/445/540/6790/55727/8945/595/1050/8837/1460/1605/780/10522/2194/2737/2806/3099/3482/3321/128239/4041/5595/4781/5021/5087/5106/5111/7001/5618/79810/90780/6195/6256/10512/7043/706/7298/7477
Downregulated	Knockdown untreated	GO:0046165	alcohol biosynthetic process	22/914	175/18670	4.68939e-05	0.00292185	0.00256176	8912/1727/1595/79947/1719/79071/2194/2539/2805/3158/3613/3706/8720/4597/5092/5106/51196/23007/5447/2185/6713/7108
Downregulated	Knockdown untreated	GO:0022904	respiratory electron transport chain	17/914	117/18670	5.45083e-05	0.00331138	0.00290329	7915/9377/1537/2110/23479/4705/51079/4696/91942/4713/4715/4724/374291/4729/83733/440567/27089
Downregulated	Knockdown untreated	GO:0006631	fatty acid metabolic process	37/914	383/18670	6.62169e-05	0.00392456	0.0034409	122970/11332/8309/8310/2180/207/7915/1374/1384/55268/83401/60481/79071/2053/2110/2194/2639/2678/2879/2946/51144/7923/3712/4048/5595/4282/7376/5096/5106/5164/23659/255189/5447/5730/22949/376497/10998
Downregulated	Knockdown untreated	GO:0072522	purine-containing compound biosynthetic process	32/914	313/18670	7.01063e-05	0.00405615	0.00355627	8086/11332/2180/100/109/115/226/351/353/1537/1716/55526/83401/60481/79071/957/2194/2584/2639/3098/3099/51144/7923/25902/348995/9688/4967/9061/9060/5164/5634/6576
Downregulated	Knockdown untreated	GO:0046390	ribose phosphate biosynthetic process	31/914	300/18670	7.41861e-05	0.00419238	0.00367571	8086/11332/2180/109/115/226/351/353/1537/55526/83401/60481/79071/957/2194/2539/2584/2639/3098/3099/51144/7923/348995/9688/4967/9061/9060/5164/5634/6576/7371
Downregulated	Knockdown untreated	GO:0009165	nucleotide biosynthetic process	37/914	386/18670	7.79115e-05	0.00427599	0.00374902	8086/11332/2180/100/109/115/10554/10555/226/351/353/1537/1635/1716/55526/83401/60481/79071/957/2194/2584/2639/3098/3099/51144/7923/348995/9688/4967/9061/9060/5164/5634/6240/6576/7298/7371
Downregulated	Knockdown untreated	GO:0009060	aerobic respiration	14/914	87/18670	7.9185e-05	0.00427599	0.00374902	48/50/9377/55526/2271/3419/4190/4191/374291/4967/6472/9016/6834/440567
Downregulated	Knockdown untreated	GO:0006767	water-soluble vitamin metabolic process	14/914	88/18670	8.99907e-05	0.00475386	0.00416799	171425/1528/1727/1719/2348/9446/3141/56922/326625/25902/5096/6472/9962/113235
Downregulated	Knockdown untreated	GO:0032434	regulation of proteasomal ubiquitin-dependent protein catabolic process	17/914	122/18670	9.30646e-05	0.00481164	0.00421865	207/54467/6790/10134/1050/23274/150684/26263/10755/2768/3303/9683/55872/8554/5886/5887/7874
Downregulated	Knockdown untreated	GO:1901293	nucleoside phosphate biosynthetic process	37/914	390/18670	9.64115e-05	0.00488083	0.00427932	8086/11332/2180/100/109/115/10554/10555/226/351/353/1537/1635/1716/55526/83401/60481/79071/957/2194/2584/2639/3098/3099/51144/7923/348995/9688/4967/9061/9060/5164/5634/6240/6576/7298/7371
Downregulated	Knockdown untreated	GO:0140014	mitotic nuclear division	28/914	264/18670	0.000104158	0.00516538	0.0045288	8086/9639/6790/332/1063/79643/9787/2316/3303/9928/4041/10459/9918/4751/10783/55968/25936/54984/5518/56984/84722/9232/5902/8243/7039/9319/7283/11065
Downregulated	Knockdown untreated	GO:0006520	cellular amino acid metabolic process	35/914	366/18670	0.000126207	0.00613367	0.00537776	18/95/7915/4329/445/548596/1159/1312/10491/2639/2678/2731/2746/2805/2806/3028/3712/56922/84245/4482/9054/4967/5034/54681/5092/51449/27068/5625/5690/5693/5717/9861/5831/6472/23428
Downregulated	Knockdown untreated	GO:0006839	mitochondrial transport	27/914	256/18670	0.000150822	0.00718625	0.00630061	572/598/400916/131474/1374/1537/3099/3303/3954/9927/4285/10651/51079/4976/10531/5664/5880/89941/6576/9016/83733/79085/293/7069/26521/706/7351
Downregulated	Knockdown untreated	GO:1901617	organic hydroxy compound biosynthetic process	28/914	271/18670	0.000162822	0.00760879	0.00667108	8309/8912/1727/1595/1652/79947/1719/79071/2194/2264/2539/10755/2805/3158/3613/3706/8720/4597/26031/5092/5106/51196/23007/5447/2185/10998/6713/7108
Downregulated	Knockdown untreated	GO:0006164	purine nucleotide biosynthetic process	30/914	300/18670	0.000172815	0.00782788	0.00686317	8086/11332/2180/100/109/115/226/351/353/1537/55526/83401/60481/79071/957/2194/2584/2639/3098/3099/51144/7923/348995/9688/4967/9061/9060/5164/5634/6576
Downregulated	Knockdown untreated	GO:0072330	monocarboxylic acid biosynthetic process	33/914	343/18670	0.000173953	0.00782788	0.00686317	8086/18/122970/11332/8309/226/351/1382/55526/83401/60481/79071/957/2053/2194/2264/2584/2879/3098/3099/51144/7923/4048/4282/7376/348995/9688/4967/26031/255189/5730/10998/10090
Downregulated	Knockdown untreated	GO:0016054	organic acid catabolic process	28/914	275/18670	0.00020823	0.0090318	0.00791872	18/122970/8309/8310/207/7915/4329/1374/1384/51181/55268/2110/2639/2731/2746/2805/2806/3028/3712/56922/4967/5092/5096/5106/51449/23659/5625/6472
Downregulated	Knockdown untreated	GO:0046395	carboxylic acid catabolic process	28/914	275/18670	0.00020823	0.0090318	0.00791872	18/122970/8309/8310/207/7915/4329/1374/1384/51181/55268/2110/2639/2731/2746/2805/2806/3028/3712/56922/4967/5092/5096/5106/51449/23659/5625/6472
Downregulated	Knockdown untreated	GO:0006979	response to oxidative stress	40/914	451/18670	0.000216517	0.0090318	0.00791872	8309/100/207/351/54840/23400/8455/572/83636/8837/1719/2067/2110/2539/2879/3303/10314/5595/79109/4358/4482/4520/318/5034/5111/5164/7001/8575/5625/5693/2185/5829/5831/6382/10280/9962/6649/10494/10131/154807
Downregulated	Knockdown untreated	GO:0090181	regulation of cholesterol metabolic process	11/914	63/18670	0.000216727	0.0090318	0.00791872	1595/79071/2053/2194/26119/8720/4597/5447/6713/7108/158219
Downregulated	Knockdown untreated	GO:0030879	mammary gland development	18/914	143/18670	0.000219291	0.0090318	0.00791872	207/353/540/8945/595/780/10522/2194/2737/2806/3099/128239/4041/5021/5618/90780/7043/7477
Downregulated	Knockdown untreated	GO:0032507	maintenance of protein location in cell	12/914	74/18670	0.00023439	0.00946435	0.00829796	207/1605/2317/8733/2934/3098/3099/3728/10945/375189/11079/706
Downregulated	Knockdown untreated	GO:1901605	alpha-amino acid metabolic process	24/914	222/18670	0.000237582	0.00946435	0.00829796	7915/4329/445/548596/1159/1312/10491/2639/2678/2731/2746/2805/2806/3712/56922/84245/4482/4967/5034/54681/5092/5625/5831/6472
Downregulated	Knockdown untreated	GO:0006694	steroid biosynthetic process	22/914	196/18670	0.000250636	0.00960226	0.00841888	8309/8912/1727/1595/79071/2194/2264/2539/3158/51144/7923/8720/4597/26031/5087/5447/5618/949/10998/6713/7108/706
Downregulated	Knockdown untreated	GO:0035384	thioester biosynthetic process	10/914	54/18670	0.000252899	0.00960226	0.00841888	2180/83401/60481/79071/2194/2639/51144/7923/5164/6576
Downregulated	Knockdown untreated	GO:0071616	acyl-CoA biosynthetic process	10/914	54/18670	0.000252899	0.00960226	0.00841888	2180/83401/60481/79071/2194/2639/51144/7923/5164/6576
Downregulated	Knockdown untreated	GO:0006119	oxidative phosphorylation	18/914	145/18670	0.000261094	0.00965005	0.00846077	400916/9377/1537/23479/4436/4705/51079/4696/4713/4715/4724/374291/4729/6472/79085/6834/440567/27089
Downregulated	Knockdown untreated	GO:0009260	ribonucleotide biosynthetic process	29/914	293/18670	0.0002621	0.00965005	0.00846077	8086/11332/2180/109/115/226/351/353/1537/55526/83401/60481/79071/957/2194/2584/2639/3098/3099/51144/7923/348995/9688/4967/9061/9060/5164/6576/7371
Downregulated	Knockdown untreated	GO:0001676	long-chain fatty acid metabolic process	15/914	109/18670	0.000271559	0.00984906	0.00863526	122970/11332/2180/1374/83401/60481/79071/2053/2879/2946/4048/5595/5730/376497/10998
Downregulated	Knockdown untreated	GO:0009152	purine ribonucleotide biosynthetic process	28/914	280/18670	0.000280621	0.0100281	0.00879222	8086/11332/2180/109/115/226/351/353/1537/55526/83401/60481/79071/957/2194/2584/2639/3098/3099/51144/7923/348995/9688/4967/9061/9060/5164/6576
Downregulated	Knockdown untreated	GO:0006766	vitamin metabolic process	17/914	134/18670	0.000295584	0.0104097	0.00912679	874/171425/1528/1727/1719/2348/9446/3141/56922/326625/25902/5096/6256/6472/9962/113235/154807
Downregulated	Knockdown untreated	GO:0051495	positive regulation of cytoskeleton organization	24/914	226/18670	0.000310341	0.0107733	0.00944558	9639/10552/10109/81873/10458/274/1072/57175/23191/51466/2316/29899/2934/3303/22998/51199/55968/5216/84722/2185/5829/5879/5902/7043
Downregulated	Knockdown untreated	GO:0032543	mitochondrial translation	17/914	135/18670	0.000323076	0.0110574	0.00969469	26284/10128/54948/51073/64975/51642/128308/51649/23107/28957/65993/64965/55005/6472/26995/10102/7284
Downregulated	Knockdown untreated	GO:0007015	actin filament organization	36/914	400/18670	0.0003333	0.0112489	0.00986257	81/83543/226/116985/10565/9639/10552/10109/81873/10458/274/832/1072/57175/23191/28988/81624/10278/83715/51466/2316/2934/7184/3693/22998/10459/10529/5216/375189/2185/5829/5879/5880/8153/7043/11078
Downregulated	Knockdown untreated	GO:0070125	mitochondrial translational elongation	13/914	88/18670	0.000338808	0.0112781	0.00988821	26284/54948/51073/64975/51642/128308/51649/23107/28957/65993/64965/10102/7284
Downregulated	Knockdown untreated	GO:1903050	regulation of proteolysis involved in cellular protein catabolic process	23/914	214/18670	0.000345514	0.0113047	0.00991146	207/54467/6790/10134/8945/1050/23274/150684/26263/10755/2768/3303/9683/55872/8554/5747/2185/5886/5887/9349/51465/8975/7874
Downregulated	Knockdown untreated	GO:0010498	proteasomal protein catabolic process	41/914	477/18670	0.000348909	0.0113047	0.00991146	207/267/54467/6790/10134/8945/1050/23274/150684/54788/11124/115290/26232/26263/80020/10755/2768/7184/3303/9928/9683/55666/55968/55872/8554/5527/5690/5693/5717/9861/9232/5886/5887/54476/81858/114088/11065/51465/9354/8975/7874
Downregulated	Knockdown untreated	GO:0008203	cholesterol metabolic process	18/914	150/18670	0.00039723	0.0124047	0.010876	351/1050/1727/1595/79071/2053/2194/2539/3158/26119/8720/4597/5447/6256/949/6713/7108/158219
Downregulated	Knockdown untreated	GO:0006805	xenobiotic metabolic process	16/914	125/18670	0.000398176	0.0124047	0.010876	2180/95/8574/22977/874/80777/1727/2053/2678/2690/2946/9446/4259/4835/5447/6818
Downregulated	Knockdown untreated	GO:0009063	cellular amino acid catabolic process	16/914	125/18670	0.000398176	0.0124047	0.010876	18/7915/4329/2639/2731/2746/2805/2806/3028/3712/56922/4967/5092/51449/5625/6472
Downregulated	Knockdown untreated	GO:0051235	maintenance of location	31/914	330/18670	0.000408791	0.0125742	0.0110246	207/540/801/1605/8694/11124/2280/2316/2317/8733/29899/2934/2946/9446/3098/3099/7184/3728/10945/3954/7376/375189/51196/23007/2185/11079/949/79085/6713/706/158219
Downregulated	Knockdown untreated	GO:0008202	steroid metabolic process	31/914	331/18670	0.000430511	0.0129249	0.011332	8309/351/8912/1050/1312/1727/1595/10901/79071/2053/2194/2264/2539/3158/51144/7923/26119/8720/4597/26031/5087/5447/5618/6256/949/10998/6713/6818/7108/706/158219
Downregulated	Knockdown untreated	GO:0016999	antibiotic metabolic process	18/914	151/18670	0.000430829	0.0129249	0.011332	48/50/8574/219/7915/55526/2271/3419/4190/4191/25902/4967/5106/7001/5879/5880/6482/6818
Downregulated	Knockdown untreated	hsa04370	VEGF signaling pathway	12/489	59/8081	0.000172831	0.0129624	0.0104305	207/572/5605/5600/5595/9261/255189/5530/5747/5829/5879/5880
Downregulated	Knockdown untreated	GO:1902905	positive regulation of supramolecular fiber organization	22/914	204/18670	0.000439206	0.0130155	0.0114115	351/9639/10552/10109/81873/10458/274/1072/57175/23191/51466/2316/2934/3303/22998/51199/5216/84722/2185/5829/5879/7043
Downregulated	Knockdown untreated	GO:1903362	regulation of cellular protein catabolic process	25/914	247/18670	0.000486534	0.0142443	0.0124888	207/54467/23400/6790/10134/8945/1050/23274/150684/11124/26263/10755/2768/3303/9683/55872/8554/5747/2185/5886/5887/9349/51465/8975/7874
Downregulated	Knockdown untreated	GO:0051017	actin filament bundle assembly	18/914	153/18670	0.000505461	0.0146223	0.0128202	81/83543/116985/9639/10458/57175/83715/51466/2316/7184/3693/22998/5216/2185/5829/5879/8153/7043
Downregulated	Knockdown untreated	hsa04144	Endocytosis	30/489	252/8081	0.000267935	0.0150713	0.0121276	160/1173/1175/116985/26286/10565/10552/10109/81873/274/832/79643/30846/29924/22905/58513/2261/2264/2348/8729/2870/3303/3482/9922/26119/5878/64744/51324/112936/137492
Downregulated	Knockdown untreated	GO:0071466	cellular response to xenobiotic stimulus	20/914	180/18670	0.000536087	0.0153258	0.013437	2180/95/8574/22977/445/874/8837/80777/1727/2053/2678/2690/2946/9446/4259/4835/5106/5111/5447/6818
Downregulated	Knockdown untreated	GO:0005996	monosaccharide metabolic process	28/914	292/18670	0.000552197	0.0156028	0.0136799	207/7915/226/572/8534/1374/1528/1727/51181/60343/92579/2539/2584/2805/2806/9446/3098/3099/4041/4190/4191/115209/5106/5164/5500/9962/6576/11091
Downregulated	Knockdown untreated	GO:0042176	regulation of protein catabolic process	34/914	381/18670	0.000560984	0.0156689	0.0137378	207/54467/23400/6790/10134/8945/1050/79643/23274/150684/1471/1595/11124/26263/2316/10755/2768/3303/10459/9683/51079/4905/55872/5245/8554/5747/2185/5886/5887/9349/6625/51465/8975/7874
Downregulated	Knockdown untreated	GO:1902652	secondary alcohol metabolic process	18/914	155/18670	0.000590997	0.0162443	0.0142424	351/1050/1727/1595/79071/2053/2194/2539/3158/26119/8720/4597/5447/6256/949/6713/7108/158219
Downregulated	Knockdown untreated	GO:0045185	maintenance of protein location	14/914	105/18670	0.000594957	0.0162443	0.0142424	207/1605/11124/2316/2317/8733/2934/3098/3099/3728/10945/375189/11079/706
Downregulated	Knockdown untreated	GO:0062012	regulation of small molecule metabolic process	39/914	459/18670	0.000602303	0.0162622	0.014258	8086/207/160/351/572/171425/1312/1374/1595/60481/79071/957/2053/60343/2194/2264/23479/26119/8720/4597/7376/348995/9688/5164/5447/5500/5690/5693/5717/9861/2185/6472/23408/79085/6713/7108/706/158219/11091
Downregulated	Knockdown untreated	GO:0006006	glucose metabolic process	22/914	209/18670	0.000611819	0.0163376	0.0143241	207/7915/226/572/1374/51181/60343/92579/2539/2805/2806/3098/3099/4041/4190/4191/115209/5106/5164/5500/6576/11091
Downregulated	Knockdown untreated	hsa01524	Platinum drug resistance	13/489	73/8081	0.000376907	0.0169608	0.013648	207/540/572/598/332/2067/2946/9446/2953/5595/4259/4436/331
Downregulated	Knockdown untreated	GO:0061136	regulation of proteasomal protein catabolic process	20/914	183/18670	0.00066239	0.0174957	0.0153396	207/54467/6790/10134/8945/1050/23274/150684/26263/10755/2768/3303/9683/55872/8554/5886/5887/51465/8975/7874
Downregulated	Knockdown untreated	GO:1901653	cellular response to peptide	34/914	385/18670	0.000674852	0.0176332	0.0154601	109/115/207/351/353/445/155066/51606/10458/8837/1154/23191/2101/2213/2690/2771/2805/2887/23641/4976/5106/5164/5447/5575/5618/5747/5770/5829/9349/29988/252983/94056/90933/7249
Downregulated	Knockdown untreated	GO:0061572	actin filament bundle organization	18/914	157/18670	0.00068871	0.0178039	0.0156097	81/83543/116985/9639/10458/57175/83715/51466/2316/7184/3693/22998/5216/2185/5829/5879/8153/7043
Downregulated	Knockdown untreated	GO:0051651	maintenance of location in cell	13/914	95/18670	0.00071893	0.0183895	0.0161231	207/1605/2317/8733/29899/2934/3098/3099/3728/10945/375189/11079/706
Downregulated	Knockdown untreated	GO:0048010	vascular endothelial growth factor receptor signaling pathway	13/914	96/18670	0.000795034	0.0201243	0.0176442	10458/23191/63916/22905/2887/5600/9261/5062/5747/2185/5770/5829/5879
Downregulated	Knockdown untreated	GO:0042119	neutrophil activation	41/914	498/18670	0.00082466	0.020659	0.018113	10120/10555/226/8907/327/353/411/124583/965/1675/338339/8895/8804/1460/1471/1508/1509/1727/23191/28988/8694/2213/2934/3303/3482/3728/4048/4282/5036/5717/9861/5834/5878/5879/9522/6836/11322/55754/9725/203068/81567
Downregulated	Knockdown untreated	GO:0042775	mitochondrial ATP synthesis coupled electron transport	13/914	97/18670	0.000877791	0.0217656	0.0190832	9377/1537/23479/4705/51079/4696/4713/4715/4724/374291/4729/440567/27089
Downregulated	Knockdown untreated	GO:0043687	post-translational protein modification	32/914	361/18670	0.000899928	0.0220892	0.0193669	334/351/51130/8945/1154/150684/10491/1471/79269/55827/56975/115290/26232/26263/26190/51280/7184/23463/8720/5034/5690/5693/5717/9861/8073/51156/25870/56995/140739/64856/11091/55884
Downregulated	Knockdown untreated	GO:0043312	neutrophil degranulation	40/914	485/18670	0.000918029	0.0223081	0.0195589	10120/10555/226/8907/327/353/411/124583/965/1675/338339/8895/8804/1460/1471/1508/1509/1727/23191/28988/8694/2934/3303/3482/3728/4048/4282/5036/5717/9861/5834/5878/5879/9522/6836/11322/55754/9725/203068/81567
Downregulated	Knockdown untreated	GO:0042773	ATP synthesis coupled electron transport	13/914	98/18670	0.00096765	0.0232811	0.0204119	9377/1537/23479/4705/51079/4696/4713/4715/4724/374291/4729/440567/27089
Downregulated	Knockdown untreated	GO:0006695	cholesterol biosynthetic process	11/914	75/18670	0.0010111	0.024088	0.0211194	1727/1595/79071/2194/2539/3158/8720/4597/5447/6713/7108
Downregulated	Knockdown untreated	GO:0002283	neutrophil activation involved in immune response	40/914	488/18670	0.00103182	0.024343	0.0213429	10120/10555/226/8907/327/353/411/124583/965/1675/338339/8895/8804/1460/1471/1508/1509/1727/23191/28988/8694/2934/3303/3482/3728/4048/4282/5036/5717/9861/5834/5878/5879/9522/6836/11322/55754/9725/203068/81567
Downregulated	Knockdown untreated	GO:1902653	secondary alcohol biosynthetic process	11/914	76/18670	0.00113094	0.0264249	0.0231683	1727/1595/79071/2194/2539/3158/8720/4597/5447/6713/7108
Downregulated	Knockdown untreated	GO:0071375	cellular response to peptide hormone stimulus	29/914	321/18670	0.00114536	0.0265068	0.0232401	109/115/207/353/445/155066/51606/10458/8837/1154/23191/2101/2690/2771/2805/2887/4976/5106/5164/5447/5575/5618/5747/5770/5829/29988/252983/94056/7249
Downregulated	Knockdown untreated	GO:0000070	mitotic sister chromatid segregation	17/914	151/18670	0.00117467	0.0269288	0.0236101	1063/79643/9787/9928/10459/9918/4751/10783/25936/54984/5518/56984/84722/9232/8243/9319/7283
Downregulated	Knockdown untreated	GO:0009410	response to xenobiotic stimulus	27/914	292/18670	0.00118728	0.0269634	0.0236405	18/2180/95/100/8574/22977/445/874/8837/80777/1727/2053/2678/2690/2806/2946/9446/9455/4259/4835/5021/5106/5111/5447/5530/2185/6818
Downregulated	Knockdown untreated	GO:0046486	glycerolipid metabolic process	35/914	414/18670	0.00122466	0.0275549	0.024159	26090/2180/10554/10555/7915/56994/1154/8895/1374/1460/1622/8694/55224/84188/51573/8733/3613/7376/5106/5833/23556/94005/51604/23659/255189/51196/9791/114971/949/347735/376497/10998/10809/7069/55697
Downregulated	Knockdown untreated	GO:0019318	hexose metabolic process	24/914	249/18670	0.00123916	0.0276253	0.0242207	207/7915/226/572/8534/1374/51181/60343/92579/2539/2584/2805/2806/3098/3099/4041/4190/4191/115209/5106/5164/5500/6576/11091
Downregulated	Knockdown untreated	GO:0006120	mitochondrial electron transport, NADH to ubiquinone	9/914	55/18670	0.00129776	0.0286687	0.0251356	23479/4705/51079/4696/4713/4715/4724/374291/4729
Downregulated	Knockdown untreated	GO:0016125	sterol metabolic process	18/914	166/18670	0.00131889	0.0288729	0.0253146	351/1050/1727/1595/79071/2053/2194/2539/3158/26119/8720/4597/5447/6256/949/6713/7108/158219
Downregulated	Knockdown untreated	GO:0045017	glycerolipid biosynthetic process	24/914	251/18670	0.00138216	0.0299879	0.0262922	2180/10554/10555/56994/8895/1460/8694/55224/84188/8733/7376/5106/5833/23556/94005/51604/51196/9791/114971/949/376497/10809/7069/55697
Downregulated	Knockdown untreated	GO:0046148	pigment biosynthetic process	9/914	56/18670	0.00148031	0.0318332	0.0279101	100/353/1371/1652/10755/3145/25902/51629/706
Downregulated	Knockdown untreated	GO:0007163	establishment or maintenance of cell polarity	21/914	210/18670	0.00154528	0.0327253	0.0286922	10120/10565/9826/1058/1072/1740/8729/29899/2934/55327/79109/64398/55968/5747/2185/8153/10653/10494/55333/10090/7477
Downregulated	Knockdown untreated	GO:0071897	DNA biosynthetic process	20/914	196/18670	0.00155109	0.0327253	0.0286922	7203/1063/54108/2264/3776/10459/5595/4751/55666/5111/5245/54984/5570/5422/5425/2185/5982/85456/7298/56897
Downregulated	Knockdown untreated	GO:0002446	neutrophil mediated immunity	40/914	499/18670	0.0015622	0.0327253	0.0286922	10120/10555/226/8907/327/353/411/124583/965/1675/338339/8895/8804/1460/1471/1508/1509/1727/23191/28988/8694/2934/3303/3482/3728/4048/4282/5036/5717/9861/5834/5878/5879/9522/6836/11322/55754/9725/203068/81567
Downregulated	Knockdown untreated	GO:0043434	response to peptide hormone	36/914	436/18670	0.00158606	0.0329412	0.0288815	109/115/207/353/445/155066/51606/10458/8837/1154/1537/23191/1605/8891/2101/2690/2771/2805/2806/2887/4976/5021/5106/5164/5447/5575/5618/5747/5770/5829/376497/29988/6272/252983/94056/7249
Downregulated	Knockdown untreated	hsa05022	Pathways of neurodegeneration - multiple diseases	46/489	475/8081	0.000910724	0.0339821	0.0273447	10120/351/489/6310/572/598/801/9377/1460/1537/1742/3028/3831/4041/5605/5606/5600/5595/9927/4705/51079/4696/4713/4715/4724/374291/4729/5530/5664/5690/5693/5717/9861/5879/10280/293/10131/84790/203068/7317/51465/440567/27089/55255/55062/7477
Downregulated	Knockdown untreated	hsa05132	Salmonella infection	28/489	249/8081	0.00105722	0.0339821	0.0273447	71/10120/79026/207/10552/10109/81873/1434/23191/63916/60412/26263/2316/2317/7184/3831/5605/5606/5600/5595/10398/5216/375189/5878/5879/83439/84790/203068
Downregulated	Knockdown untreated	GO:0006415	translational termination	13/914	104/18670	0.00168361	0.034671	0.0303981	327/26284/54948/51073/64975/51642/128308/51649/23107/28957/65993/64965/55239
Downregulated	Knockdown untreated	GO:0034976	response to endoplasmic reticulum stress	26/914	285/18670	0.00175452	0.0358276	0.0314122	267/83734/10134/598/595/64764/54788/115290/26232/2213/80020/2907/7184/3303/8720/55666/4976/5034/9601/5526/5770/6818/51465/9354/8975/55062
Downregulated	Knockdown untreated	GO:1902850	microtubule cytoskeleton organization involved in mitosis	15/914	131/18670	0.00188687	0.0382092	0.0335003	8086/10120/9639/6790/332/1058/114327/2316/29899/3303/4751/55968/84722/8243/7283
Downregulated	Knockdown untreated	GO:0016126	sterol biosynthetic process	11/914	81/18670	0.00191874	0.0385334	0.0337845	1727/1595/79071/2194/2539/3158/8720/4597/5447/6713/7108
Downregulated	Knockdown untreated	GO:0016051	carbohydrate biosynthetic process	21/914	214/18670	0.00195049	0.03885	0.0340621	207/226/160/10331/192134/60343/92579/2539/2805/2806/3613/4190/4191/54187/5106/5164/5500/2185/6576/6484/11091
Downregulated	Knockdown untreated	GO:0072329	monocarboxylic acid catabolic process	15/914	132/18670	0.00203492	0.040202	0.0352475	18/8309/8310/207/7915/1374/1384/51181/55268/2110/2639/3712/5096/5106/23659
Downregulated	Knockdown untreated	GO:0071902	positive regulation of protein serine/threonine kinase activity	29/914	334/18670	0.0020888	0.0409338	0.0358891	2180/207/801/595/28988/1847/2690/128239/5605/5606/5607/5600/5595/9261/4282/4331/4515/51196/7001/84722/2185/5770/376497/94056/9623/7039/7043/7164/7477
Downregulated	Knockdown untreated	hsa05135	Yersinia infection	18/489	137/8081	0.00146422	0.0411812	0.0331376	71/207/10552/10109/81873/10458/63916/5605/5606/5600/5595/4775/5747/2185/5829/5879/5880/6195
Downregulated	Knockdown untreated	hsa04114	Oocyte meiosis	17/489	129/8081	0.00190006	0.0426951	0.0343558	109/115/6790/8945/801/10459/5600/5595/5500/5518/5526/5527/5529/5530/9232/6195/8243
Downregulated	Knockdown untreated	hsa05020	Prion disease	29/489	273/8081	0.0020977	0.0426951	0.0343558	572/9377/64764/1460/1537/3303/3831/5600/5595/4705/51079/4696/4713/4715/4724/374291/4729/5530/5690/5693/5717/9861/5879/5880/293/84790/203068/440567/27089
Downregulated	Knockdown untreated	hsa05012	Parkinson disease	27/489	249/8081	0.00220231	0.0426951	0.0343558	598/801/9377/1537/2771/3831/9927/4705/51079/4696/4713/4715/4724/374291/4729/5690/5693/5717/9861/293/10131/84790/203068/7317/51465/440567/27089
Downregulated	Knockdown untreated	hsa05014	Amyotrophic lateral sclerosis	36/489	364/8081	0.00227707	0.0426951	0.0343558	71/10120/572/598/400916/9377/1537/3831/5606/5600/4705/51079/4696/4713/4715/4724/374291/4729/348995/9688/29107/5216/375189/5530/5690/5693/5717/9861/5879/10280/84790/203068/440567/27089/55255/55062
Downregulated	Knockdown untreated	GO:0006644	phospholipid metabolic process	35/914	430/18670	0.00231903	0.0444571	0.0389782	26090/10554/10555/7915/56994/1154/8895/1460/1622/79947/55224/84188/2261/51573/8733/2879/3158/3613/4597/5833/23556/94005/51604/23659/255189/9791/5747/2185/114971/949/347735/376497/27293/10809/55697
Downregulated	Knockdown untreated	GO:0110053	regulation of actin filament organization	24/914	261/18670	0.00232921	0.0444571	0.0389782	116985/10565/9639/10552/10109/81873/10458/274/832/1072/57175/23191/28988/51466/2316/2934/22998/5216/375189/2185/5829/5879/7043/11078
Downregulated	Knockdown untreated	GO:0031346	positive regulation of cell projection organization	32/914	383/18670	0.00233603	0.0444571	0.0389782	375790/160/116985/10109/411/26053/10458/8837/57175/1382/64764/23191/28988/54606/1742/83715/3706/7804/51199/27020/4976/5064/5216/5526/2185/5879/5880/8153/10507/10494/7043/55754
Downregulated	Knockdown untreated	GO:0007006	mitochondrial membrane organization	15/914	134/18670	0.00236007	0.0444571	0.0389782	79135/572/598/400916/54927/3099/3303/10989/3954/9927/51079/115209/4976/89941/8834
Downregulated	Knockdown untreated	GO:0032273	positive regulation of protein polymerization	15/914	134/18670	0.00236007	0.0444571	0.0389782	10552/10109/81873/10458/274/57175/23191/51466/2934/3303/51199/5216/84722/2185/5879
Downregulated	Knockdown untreated	GO:0000086	G2/M transition of mitotic cell cycle	23/914	247/18670	0.00242165	0.0452663	0.0396877	351/6790/8945/595/902/1063/80321/2305/9928/4331/4751/5087/54984/5500/5518/5690/5693/5717/9861/5889/7164/203068/7283
Downregulated	Knockdown untreated	GO:0001889	liver development	15/914	135/18670	0.00253812	0.0463731	0.0406581	50/100/445/6790/595/1050/8837/1460/2737/3482/5106/5111/79810/6195/7298
Downregulated	Knockdown untreated	GO:1903825	organic acid transmembrane transport	15/914	135/18670	0.00253812	0.0463731	0.0406581	207/23204/1374/2348/6510/9962/6576/9016/83733/10998/120103/124565/113235/23428/7069
Downregulated	Knockdown untreated	GO:1905039	carboxylic acid transmembrane transport	15/914	135/18670	0.00253812	0.0463731	0.0406581	207/23204/1374/2348/6510/9962/6576/9016/83733/10998/120103/124565/113235/23428/7069
Downregulated	Knockdown untreated	GO:0045540	regulation of cholesterol biosynthetic process	8/914	50/18670	0.00275856	0.0496541	0.0435347	1595/79071/2194/8720/4597/5447/6713/7108
Downregulated	Knockdown untreated	GO:0106118	regulation of sterol biosynthetic process	8/914	50/18670	0.00275856	0.0496541	0.0435347	1595/79071/2194/8720/4597/5447/6713/7108
Downregulated	Knockdown untreated	hsa05010	Alzheimer disease	36/489	369/8081	0.00286899	0.0496556	0.0399568	207/51107/351/489/25825/572/801/9377/1460/1537/3028/3831/4041/5605/5595/4705/51079/4696/4713/4715/4724/374291/4729/5530/5664/5690/5693/5717/9861/293/84790/203068/440567/27089/55062/7477
Upregulated	Knockdown untreated	GO:0050792	regulation of viral process	3/8	208/18670	7.32462e-05	0.0234209	0.0130519	1654/5978/80149
Upregulated	Knockdown untreated	GO:0043903	regulation of symbiosis, encompassing mutualism through parasitism	3/8	222/18670	8.88838e-05	0.0234209	0.0130519	1654/5978/80149
Upregulated	Knockdown untreated	GO:0051055	negative regulation of lipid biosynthetic process	2/8	57/18670	0.000253417	0.030448	0.0169679	341/5978
Upregulated	Knockdown untreated	GO:0045862	positive regulation of proteolysis	3/8	363/18670	0.000379638	0.030448	0.0169679	1654/5978/80149
Upregulated	Knockdown untreated	GO:0051851	modification by host of symbiont morphology or physiology	2/8	77/18670	0.000462608	0.030448	0.0169679	5978/80149
Upregulated	Knockdown untreated	GO:0032481	positive regulation of type I interferon production	2/8	77/18670	0.000462608	0.030448	0.0169679	929/1654
Upregulated	Knockdown untreated	GO:0043900	regulation of multi-organism process	3/8	405/18670	0.000523218	0.030448	0.0169679	1654/5978/80149
Upregulated	Knockdown untreated	GO:0051702	interaction with symbiont	2/8	82/18670	0.000524496	0.030448	0.0169679	5978/80149
Upregulated	Knockdown untreated	GO:0045833	negative regulation of lipid metabolic process	2/8	92/18670	0.000659692	0.030448	0.0169679	341/5978
Upregulated	Knockdown untreated	GO:0045069	regulation of viral genome replication	2/8	95/18670	0.000703208	0.030448	0.0169679	1654/80149
Upregulated	Knockdown untreated	GO:0048525	negative regulation of viral process	2/8	99/18670	0.000763345	0.030448	0.0169679	5978/80149
Upregulated	Knockdown untreated	GO:0032649	regulation of interferon-gamma production	2/8	101/18670	0.000794318	0.030448	0.0169679	929/80149
Upregulated	Knockdown untreated	GO:0050708	regulation of protein secretion	3/8	472/18670	0.000817864	0.030448	0.0169679	929/5978/80149
Upregulated	Knockdown untreated	GO:0062014	negative regulation of small molecule metabolic process	2/8	107/18670	0.000890848	0.030448	0.0169679	341/5978
Upregulated	Knockdown untreated	GO:0002791	regulation of peptide secretion	3/8	500/18670	0.000967035	0.030448	0.0169679	929/5978/80149
Upregulated	Knockdown untreated	GO:0051817	modification of morphology or physiology of other organism involved in symbiotic interaction	2/8	112/18670	0.000975414	0.030448	0.0169679	5978/80149
Upregulated	Knockdown untreated	GO:0032609	interferon-gamma production	2/8	113/18670	0.000992776	0.030448	0.0169679	929/80149
Upregulated	Knockdown untreated	GO:1901222	regulation of NIK/NF-kappaB signaling	2/8	117/18670	0.00106372	0.030448	0.0169679	929/80149
Upregulated	Knockdown untreated	GO:0019079	viral genome replication	2/8	122/18670	0.00115574	0.030448	0.0169679	1654/80149
Upregulated	Knockdown untreated	GO:0019218	regulation of steroid metabolic process	2/8	124/18670	0.00119359	0.030448	0.0169679	341/5978
Upregulated	Knockdown untreated	GO:0032479	regulation of type I interferon production	2/8	126/18670	0.00123204	0.030448	0.0169679	929/1654
Upregulated	Knockdown untreated	GO:0032606	type I interferon production	2/8	128/18670	0.00127107	0.030448	0.0169679	929/1654
Upregulated	Knockdown untreated	GO:0043280	positive regulation of cysteine-type endopeptidase activity involved in apoptotic process	2/8	132/18670	0.00135092	0.0309536	0.0172497	1654/5978
Upregulated	Knockdown untreated	GO:0050709	negative regulation of protein secretion	2/8	141/18670	0.00153919	0.0331229	0.0184586	5978/80149
Upregulated	Knockdown untreated	GO:0002792	negative regulation of peptide secretion	2/8	148/18670	0.00169383	0.0331229	0.0184586	5978/80149
Upregulated	Knockdown untreated	GO:2001056	positive regulation of cysteine-type endopeptidase activity	2/8	149/18670	0.00171651	0.0331229	0.0184586	1654/5978
Upregulated	Knockdown untreated	GO:1903900	regulation of viral life cycle	2/8	149/18670	0.00171651	0.0331229	0.0184586	1654/80149
Upregulated	Knockdown untreated	GO:0017156	calcium ion regulated exocytosis	2/8	154/18670	0.00183208	0.0331229	0.0184586	5978/415117
Upregulated	Knockdown untreated	GO:1905952	regulation of lipid localization	2/8	157/18670	0.00190317	0.0331229	0.0184586	341/80149
Upregulated	Knockdown untreated	GO:0032680	regulation of tumor necrosis factor production	2/8	160/18670	0.00197556	0.0331229	0.0184586	929/80149
Upregulated	Knockdown untreated	GO:1903555	regulation of tumor necrosis factor superfamily cytokine production	2/8	163/18670	0.00204925	0.0331229	0.0184586	929/80149
Upregulated	Knockdown untreated	GO:0032640	tumor necrosis factor production	2/8	163/18670	0.00204925	0.0331229	0.0184586	929/80149
Upregulated	Knockdown untreated	GO:0035821	modification of morphology or physiology of other organism	2/8	164/18670	0.00207411	0.0331229	0.0184586	5978/80149
Upregulated	Knockdown untreated	GO:0071706	tumor necrosis factor superfamily cytokine production	2/8	168/18670	0.00217497	0.033712	0.0187869	929/80149
Upregulated	Knockdown untreated	GO:0043901	negative regulation of multi-organism process	2/8	171/18670	0.00225212	0.0339105	0.0188975	5978/80149
Upregulated	Knockdown untreated	GO:0010950	positive regulation of endopeptidase activity	2/8	178/18670	0.00243718	0.0356776	0.0198822	1654/5978
Upregulated	Knockdown untreated	GO:0010565	regulation of cellular ketone metabolic process	2/8	181/18670	0.00251864	0.0356925	0.0198906	341/5978
Upregulated	Knockdown untreated	GO:0038061	NIK/NF-kappaB signaling	2/8	183/18670	0.00257365	0.0356925	0.0198906	929/80149
Upregulated	Knockdown untreated	GO:0051224	negative regulation of protein transport	2/8	193/18670	0.00285728	0.0376982	0.0210083	5978/80149
Upregulated	Knockdown untreated	GO:1904950	negative regulation of establishment of protein localization	2/8	197/18670	0.0029747	0.0376982	0.0210083	5978/80149
Upregulated	Knockdown untreated	GO:0010952	positive regulation of peptidase activity	2/8	197/18670	0.0029747	0.0376982	0.0210083	1654/5978
Upregulated	Knockdown untreated	GO:0046890	regulation of lipid biosynthetic process	2/8	198/18670	0.00300441	0.0376982	0.0210083	341/5978
Upregulated	Knockdown untreated	GO:0071222	cellular response to lipopolysaccharide	2/8	205/18670	0.00321632	0.0377146	0.0210174	929/80149
Upregulated	Knockdown untreated	GO:0051701	interaction with host	2/8	209/18670	0.0033405	0.0377146	0.0210174	1500/80149
Upregulated	Knockdown untreated	GO:0017148	negative regulation of translation	2/8	209/18670	0.0033405	0.0377146	0.0210174	1654/80149
Upregulated	Knockdown untreated	GO:0050707	regulation of cytokine secretion	2/8	210/18670	0.00337189	0.0377146	0.0210174	929/80149
Upregulated	Knockdown untreated	GO:1903531	negative regulation of secretion by cell	2/8	211/18670	0.00340343	0.0377146	0.0210174	5978/80149
Upregulated	Knockdown untreated	GO:0071219	cellular response to molecule of bacterial origin	2/8	212/18670	0.00343511	0.0377146	0.0210174	929/80149
Upregulated	Knockdown untreated	GO:0043281	regulation of cysteine-type endopeptidase activity involved in apoptotic process	2/8	215/18670	0.00353097	0.0379759	0.0211631	1654/5978
Upregulated	Knockdown untreated	GO:0034249	negative regulation of cellular amide metabolic process	2/8	229/18670	0.0039949	0.0421062	0.0234648	1654/80149
Upregulated	Knockdown untreated	GO:0071216	cellular response to biotic stimulus	2/8	236/18670	0.00423703	0.0427301	0.0238125	929/80149
Upregulated	Knockdown untreated	GO:0051048	negative regulation of secretion	2/8	238/18670	0.00430745	0.0427301	0.0238125	5978/80149
Upregulated	Knockdown untreated	GO:2000116	regulation of cysteine-type endopeptidase activity	2/8	239/18670	0.00434287	0.0427301	0.0238125	1654/5978
Upregulated	Knockdown untreated	GO:0050663	cytokine secretion	2/8	240/18670	0.00437842	0.0427301	0.0238125	929/80149
Upregulated	Knockdown untreated	GO:0042180	cellular ketone metabolic process	2/8	248/18670	0.00466778	0.0447258	0.0249246	341/5978
Downregulated	Control stressed	GO:0006937	regulation of muscle contraction	10/206	171/18670	2.07413e-05	0.0418975	0.0380112	18/1829/1832/2281/10398/255743/4878/8654/4092/7136
Upregulated	Control stressed	GO:0030218	erythrocyte differentiation	3/18	114/18670	0.000169225	0.0252952	0.0208949	3398/10365/9935
Upregulated	Control stressed	GO:0002761	regulation of myeloid leukocyte differentiation	3/18	117/18670	0.000182733	0.0252952	0.0208949	2353/3398/9935
Upregulated	Control stressed	GO:0034101	erythrocyte homeostasis	3/18	122/18670	0.000206773	0.0252952	0.0208949	3398/10365/9935
Upregulated	Control stressed	GO:0002262	myeloid cell homeostasis	3/18	147/18670	0.000357815	0.0328295	0.0271186	3398/10365/9935
Upregulated	Control stressed	GO:0030099	myeloid cell differentiation	4/18	416/18670	0.000580182	0.0357348	0.0295185	2353/3398/10365/9935
Upregulated	Control stressed	GO:0071248	cellular response to metal ion	3/18	190/18670	0.000756366	0.0357348	0.0295185	2353/2354/3398
Upregulated	Control stressed	GO:1901654	response to ketone	3/18	193/18670	0.000791525	0.0357348	0.0295185	2353/2354/10365
Upregulated	Control stressed	GO:0002573	myeloid leukocyte differentiation	3/18	204/18670	0.000929329	0.0357348	0.0295185	2353/3398/9935
Upregulated	Control stressed	GO:0071241	cellular response to inorganic substance	3/18	217/18670	0.00111081	0.0357348	0.0295185	2353/2354/3398
Upregulated	Control stressed	GO:0006376	mRNA splice site selection	2/18	53/18670	0.00117505	0.0357348	0.0295185	26869/100151683
Upregulated	Control stressed	GO:0002763	positive regulation of myeloid leukocyte differentiation	2/18	54/18670	0.00121955	0.0357348	0.0295185	2353/3398
Upregulated	Control stressed	GO:0043392	negative regulation of DNA binding	2/18	54/18670	0.00121955	0.0357348	0.0295185	1869/3398
Upregulated	Control stressed	GO:0045292	mRNA cis splicing, via spliceosome	2/18	56/18670	0.00131094	0.0357348	0.0295185	26869/100151683
Upregulated	Control stressed	GO:0097305	response to alcohol	3/18	233/18670	0.00136318	0.0357348	0.0295185	2353/2354/10365
Upregulated	Control stressed	GO:0048872	homeostasis of number of cells	3/18	246/18670	0.00159288	0.0368798	0.0304643	3398/10365/9935
Upregulated	Control stressed	GO:0045637	regulation of myeloid cell differentiation	3/18	251/18670	0.00168731	0.0368798	0.0304643	2353/3398/9935
Upregulated	Control stressed	GO:0045670	regulation of osteoclast differentiation	2/18	64/18670	0.00170833	0.0368798	0.0304643	2353/9935
Upregulated	Control stressed	GO:1902105	regulation of leukocyte differentiation	3/18	272/18670	0.00212219	0.0432691	0.0357422	2353/3398/9935
Upregulated	Control stressed	GO:0014015	positive regulation of gliogenesis	2/18	74/18670	0.00227577	0.0439583	0.0363115	1869/3398
Upregulated	Control stressed	hsa05224	Breast cancer	3/11	147/8081	0.000874294	0.048691	0.0334857	1869/2353/10912
Upregulated	Control stressed	hsa05031	Amphetamine addiction	2/11	69/8081	0.00376034	0.048691	0.0334857	2353/2354
Upregulated	Control stressed	hsa05218	Melanoma	2/11	72/8081	0.00408782	0.048691	0.0334857	1869/10912
Upregulated	Control stressed	hsa05223	Non-small cell lung cancer	2/11	72/8081	0.00408782	0.048691	0.0334857	1869/10912
Upregulated	Control stressed	hsa05214	Glioma	2/11	75/8081	0.00442819	0.048691	0.0334857	1869/10912
Upregulated	Control stressed	hsa05212	Pancreatic cancer	2/11	76/8081	0.00454449	0.048691	0.0334857	1869/10912
Upregulated	Control stressed	hsa05220	Chronic myeloid leukemia	2/11	76/8081	0.00454449	0.048691	0.0334857	1869/10912
Upregulated	Control stressed	GO:0071158	positive regulation of cell cycle arrest	2/18	82/18670	0.00278543	0.0487191	0.0402441	1869/3398
Upregulated	Control stressed	GO:0071277	cellular response to calcium ion	2/18	83/18670	0.00285258	0.0487191	0.0402441	2353/2354
Upregulated	Control stressed	GO:0000245	spliceosomal complex assembly	2/18	84/18670	0.00292049	0.0487191	0.0402441	26869/100151683
Downregulated	Knockdown Stressed	GO:0006520	cellular amino acid metabolic process	45/852	366/18670	1.46985e-09	3.54086e-06	3.30174e-06	84890/125061/8659/7915/4329/445/549/594/548596/1159/1160/10491/23576/124454/58478/10667/2593/23464/2639/2653/2731/2744/2746/8833/2806/11112/55699/3712/23395/4357/4482/10588/79731/9054/5184/5351/27068/152926/10213/9861/6470/23428/6611/63826/7263
Downregulated	Knockdown Stressed	GO:0044282	small molecule catabolic process	49/852	445/18670	1.10923e-08	1.33607e-05	1.24584e-05	11057/171586/122970/100/84890/125061/219/217/221/8659/7915/4329/226/549/594/622/874/1374/51084/23576/955/2108/2110/2585/2597/23464/2639/2653/2710/2720/2731/2744/2746/2806/3032/11112/3098/3712/4357/10588/55577/53343/5191/152926/6470/10478/6652/7167/7263
Downregulated	Knockdown Stressed	GO:1901605	alpha-amino acid metabolic process	31/852	222/18670	2.88069e-08	2.31319e-05	2.15698e-05	125061/8659/7915/4329/445/549/548596/1159/1160/10491/23576/58478/2593/23464/2639/2653/2731/2744/2746/8833/2806/11112/3712/4357/4482/10588/5351/6470/6611/63826/7263
Downregulated	Knockdown Stressed	GO:0016054	organic acid catabolic process	34/852	275/18670	1.3114e-07	6.31831e-05	5.89162e-05	11057/171586/122970/84890/125061/8659/7915/4329/549/594/1374/51084/23576/2108/2110/23464/2639/2653/2731/2744/2746/2806/3032/11112/3712/4357/10588/55577/5191/152926/6470/10478/6652/7263
Downregulated	Knockdown Stressed	GO:0046395	carboxylic acid catabolic process	34/852	275/18670	1.3114e-07	6.31831e-05	5.89162e-05	11057/171586/122970/84890/125061/8659/7915/4329/549/594/1374/51084/23576/2108/2110/23464/2639/2653/2731/2744/2746/2806/3032/11112/3712/4357/10588/55577/5191/152926/6470/10478/6652/7263
Downregulated	Knockdown Stressed	GO:0009063	cellular amino acid catabolic process	21/852	125/18670	2.1788e-07	8.7479e-05	8.15714e-05	84890/125061/8659/7915/4329/549/594/23576/23464/2639/2653/2731/2744/2746/2806/11112/3712/4357/152926/6470/7263
Downregulated	Knockdown Stressed	GO:0051188	cofactor biosynthetic process	34/852	326/18670	6.53271e-06	0.00224819	0.00209636	10058/11332/125061/226/51805/1352/1737/6785/2597/2639/10243/3098/3145/3418/3658/326625/4338/25902/10588/9054/23057/349565/57122/348995/55753/53354/5164/57107/5209/5562/5663/4891/8803/7167
Downregulated	Knockdown Stressed	GO:0006732	coenzyme metabolic process	39/852	403/18670	8.45674e-06	0.00254654	0.00237456	84320/122970/11332/125061/226/262/874/51805/1528/1737/6785/58478/2593/2597/2639/10243/3098/3158/3418/4338/25902/10588/9054/23057/349565/23530/57122/348995/55753/53354/5164/57107/5209/5562/5663/6470/8803/7167/7298
Downregulated	Knockdown Stressed	GO:0006575	cellular modified amino acid metabolic process	24/852	202/18670	1.77438e-05	0.00474942	0.00442868	8659/7915/445/548596/1159/1160/1374/10491/58478/2593/2806/2936/2944/2946/3249/25902/10588/114884/114882/81579/5351/6470/6583/7298
Downregulated	Knockdown Stressed	GO:0042278	purine nucleoside metabolic process	13/852	76/18670	3.60539e-05	0.00868538	0.00809884	100/262/1716/1740/58478/2593/8833/10243/28992/55669/4338/4354/9054
Downregulated	Knockdown Stressed	GO:0032543	mitochondrial translation	18/852	135/18670	4.26736e-05	0.00934552	0.0087144	124454/22868/85476/55699/23395/10128/29093/79590/51264/11222/54148/28977/122704/63931/51649/23107/28957/60488
Downregulated	Knockdown Stressed	GO:0140053	mitochondrial gene expression	20/852	162/18670	5.03785e-05	0.0101135	0.0094305	400916/124454/22868/85476/55699/23395/10128/29093/79590/51264/11222/54148/28977/122704/63931/51649/23107/28957/60488/5562
Downregulated	Knockdown Stressed	GO:0016999	antibiotic metabolic process	19/852	151/18670	5.93587e-05	0.0109996	0.0102568	48/219/217/221/7915/1737/81889/3418/3658/25902/10588/55577/23530/55753/7837/5879/6389/6391/8803
Downregulated	Knockdown Stressed	GO:0009108	coenzyme biosynthetic process	27/852	261/18670	6.54859e-05	0.0112682	0.0105073	11332/125061/226/51805/1737/6785/2597/2639/10243/3098/3418/4338/25902/10588/9054/23057/349565/57122/348995/55753/53354/5164/57107/5209/5562/5663/7167
Downregulated	Knockdown Stressed	GO:0045333	cellular respiration	22/852	193/18670	7.35651e-05	0.0118146	0.0110167	48/7915/55847/1352/1737/29103/2108/2110/81889/22868/3418/3658/4705/4713/4714/23530/55753/6389/6391/10165/8803/10131
Downregulated	Knockdown Stressed	GO:1901606	alpha-amino acid catabolic process	15/852	106/18670	9.18837e-05	0.0137865	0.0128554	125061/8659/4329/549/23576/23464/2639/2653/2731/2744/2746/2806/11112/3712/6470
Downregulated	Knockdown Stressed	GO:0055076	transition metal ion homeostasis	17/852	131/18670	9.72893e-05	0.0137865	0.0128554	10058/22/48/375/150684/79901/10539/3658/80762/8301/4891/64924/148867/10463/1317/64116/55240
Downregulated	Knockdown Stressed	GO:0046128	purine ribonucleoside metabolic process	12/852	73/18670	0.000106547	0.0142595	0.0132965	100/262/1716/1740/58478/2593/8833/10243/55669/4338/4354/9054
Downregulated	Knockdown Stressed	GO:0006664	glycolipid metabolic process	15/852	110/18670	0.000140694	0.0178385	0.0166338	7915/8706/2581/2720/4668/9488/93183/23556/94005/51604/55650/80235/5562/285362/7357
Downregulated	Knockdown Stressed	GO:1903509	liposaccharide metabolic process	15/852	111/18670	0.000155945	0.0180298	0.0168122	7915/8706/2581/2720/4668/9488/93183/23556/94005/51604/55650/80235/5562/285362/7357
Downregulated	Knockdown Stressed	GO:0043648	dicarboxylic acid metabolic process	14/852	99/18670	0.000157171	0.0180298	0.0168122	122970/8659/7915/445/2744/2746/2806/9380/3418/25902/10588/6389/6470/8803
Downregulated	Knockdown Stressed	GO:0070125	mitochondrial translational elongation	13/852	88/18670	0.000171231	0.0187498	0.0174836	85476/29093/79590/51264/11222/54148/28977/122704/63931/51649/23107/28957/60488
Downregulated	Knockdown Stressed	GO:0046148	pigment biosynthetic process	10/852	56/18670	0.000196024	0.0205314	0.0191449	100/1352/1652/8833/3145/3658/25902/4644/6470/4891
Downregulated	Knockdown Stressed	GO:0051258	protein polymerization	27/852	283/18670	0.000251689	0.0248933	0.0232122	10152/57180/118/120/375/84100/10092/274/832/55755/23122/28988/81624/10059/51466/2885/23189/4641/4690/54820/51199/5879/5921/85477/55761/7283/7756
Downregulated	Knockdown Stressed	GO:0032984	protein-containing complex disassembly	30/852	329/18670	0.000258336	0.0248933	0.0232122	118/120/196528/832/400916/26586/23122/1452/8321/3920/79929/29093/79590/51264/11222/54148/28977/122704/63931/51649/23107/28957/60488/85477/6601/57231/29979/8673/51534/10269
Downregulated	Knockdown Stressed	GO:0015980	energy derivation by oxidation of organic compounds	27/852	285/18670	0.000281829	0.0261126	0.0243491	48/7915/801/55847/1352/1737/29103/5167/2108/2110/81889/22868/3418/3658/3953/4705/4713/4714/23530/55753/5500/6389/6391/10165/8803/10131/7360
Downregulated	Knockdown Stressed	GO:0006414	translational elongation	16/852	133/18670	0.000372096	0.0328809	0.0306604	120526/51611/1915/85476/29093/79590/51264/11222/54148/28977/122704/63931/51649/23107/28957/60488
Downregulated	Knockdown Stressed	GO:0006605	protein targeting	36/852	432/18670	0.000383792	0.0328809	0.0306604	122970/10053/84100/131474/1121/29103/2053/60412/3329/23463/196294/3920/4053/4285/4641/9520/196743/5174/5191/5562/7879/27342/6164/6167/3921/7095/28972/9789/55333/66008/9697/7314/7323/8239/23230/54469
Downregulated	Knockdown Stressed	GO:0046916	cellular transition metal ion homeostasis	14/852	108/18670	0.000395827	0.0328809	0.0306604	10058/22/48/375/79901/10539/3658/80762/4891/64924/148867/10463/1317/64116
Downregulated	Knockdown Stressed	GO:0006790	sulfur compound metabolic process	32/852	372/18670	0.00046095	0.0370143	0.0345147	84320/122970/11332/84890/7915/262/22901/1737/6785/58478/5167/2593/2639/2720/26035/10539/2936/2944/2946/3158/122961/4357/4482/9054/9060/5164/6611/8803/6820/8459/7263/64131
Downregulated	Knockdown Stressed	GO:0009123	nucleoside monophosphate metabolic process	32/852	375/18670	0.000529395	0.0411391	0.0383609	100/226/481/525/400916/1352/1635/1716/1740/29103/10059/5167/2597/8833/3098/4354/4705/4713/4714/53343/57122/348995/55753/5209/5562/5663/6389/6391/6470/10165/7167/7298
Downregulated	Knockdown Stressed	GO:0043687	post-translational protein modification	31/852	361/18670	0.00057823	0.0435299	0.0405902	334/51130/140461/813/1121/150684/51138/10491/79269/5611/1161/115290/23291/84261/11167/2519/2621/23463/3490/90293/3915/51451/11320/10213/9861/6383/285362/54972/3371/56995/140739
Downregulated	Knockdown Stressed	hsa01200	Carbon metabolism	17/447	118/8081	0.000245577	0.0447156	0.0447156	48/4329/226/1737/2597/2653/2731/2746/2806/3098/3418/55753/6389/6391/6470/8803/7167
Downregulated	Knockdown Stressed	hsa00330	Arginine and proline metabolism	10/447	51/8081	0.000399247	0.0447156	0.0447156	219/217/8659/262/548596/1159/1160/2593/2806/6611
Downregulated	Knockdown Stressed	GO:0030041	actin filament polymerization	19/852	182/18670	0.000676567	0.0486184	0.0453352	10152/57180/118/120/375/10092/274/832/28988/81624/51466/2885/23189/4641/4690/5879/5921/85477/55761
Downregulated	Knockdown Stressed	GO:0034599	cellular response to oxidative stress	27/852	302/18670	0.000696716	0.0486184	0.0453352	9131/221/10550/488/890/8321/9283/2936/10314/79109/4482/253827/318/5111/5164/5562/5796/5829/140885/6649/140809/7168/10131/29979/154807/7444/11179
Downregulated	Knockdown Stressed	GO:0070126	mitochondrial translational termination	12/852	89/18670	0.00070637	0.0486184	0.0453352	29093/79590/51264/11222/54148/28977/122704/63931/51649/23107/28957/60488
Upregulated	Knockdown Stressed	GO:0032663	regulation of interleukin-2 production	3/15	54/18670	1.0154e-05	0.00347782	0.00285726	301/53833/10524
Upregulated	Knockdown Stressed	GO:0032623	interleukin-2 production	3/15	62/18670	1.54227e-05	0.00347782	0.00285726	301/53833/10524
Upregulated	Knockdown Stressed	GO:0071103	DNA conformation change	4/15	327/18670	0.000108262	0.0162754	0.0133713	301/1106/84875/64061
Upregulated	Knockdown Stressed	GO:0002460	adaptive immune response based on somatic recombination of immune receptors built from immunoglobulin superfamily domains	4/15	361/18670	0.000158507	0.0178717	0.0146828	301/11118/53833/3981
Upregulated	Knockdown Stressed	GO:0010212	response to ionizing radiation	3/15	147/18670	0.000203004	0.018311	0.0150437	301/10524/3981
