# Supplementary material for: TP53mutation–associated and copy number–dependent KDM7A-DT expression affects DNA repair and promotes invasive breast cancer progression
Source: Research Square preprint supplement (doi:10.21203/rs.3.rs-1896103/v3), 2022-09-27
Supplement: Supplementary file 22 [file e2ed442d741a241af8aa9e7c.xlsx]

## Sheet: TS1
Table S1. Primer pairs used for amplification of the DNA probes for different regions of KDM7A-DT transcript
Type	Name	Sequence (5'->3')
Cloning Primers	NR_036539F	5′-ACAACAGAATTCGGAGGCGCCATTTTGTAG-3′
	NR_036539R	5′-ACAACAGGATCCTGATTTAAACTTCTTTATTAACAGAATATATG-3′
	NR_002799F	5′-ACAACAGAATTCGAAGGCGGAGGGATGG-3′
	NR_002799R	5′-ACAACAGGATCCTTGGCCAGGCTGGTCTT-3′
	NR_036530F	5′-ACAACAGAATTCCGGGAAGTGGGAGCTTC-3′
	NR_036530R	5′-ACAACAGGATCCGAGTTATGTTTTGAGATTTTTTTGAAGG-3′
ASO	2OMe/PS-392	mG*mA*mC*mG*mC*T*C*T*G*G*T*C*T*C*C*mU*mU*mG*mC*m
	2OMe/PS-424	mA*mC*mA*mG*mC*C*C*T*C*C*C*G*C*A*A*mC*mU*mA*mA*mC
	2OMe/PS-457	mC*mC*mA*mG*mC*G*G*A*C*G*A*C*A*G*T*mG*mA*mU*mG*mA
	NC1	mG*mC*mG*mU*mA*T*T*A*T*A*G*C*C*G*A*mU*mU*mA*mA*mC
	NC5	mG*mC*mG*mA*mC*T*A*T*A*C*G*C*G*C*A*mA*mU*mA*mU*mG
qPCR Primers	KDM7A-DT-F	5′- GTGAAGAGAAGGCATGCAAAG-3
	KDM7A-DT-R	5′- CTTCATACCCCTGCCTAGTCC-3
	AS-KDM7A-DT-F	5′- ACCTCCAACATTGGGGATTAC-3′
	AS-KDM7A-DT-R	5′- GGCATCACATATTGCTGGAGT-3′
	NR_036539-F	5′-GGGGGTAGAATTGAGCTACCA-3′
	NR_036539-R	5′- ATCATCCAGCTTTCTCCCTGT-3′
	NR_002799-F	5′- CTCCAGGGAAGCTTTGTGATA-3′
	NR_002799-R	5′- ATTCAGCGAGGCAACAGTAAA-3′
	NR_036530-F	5′- TGGGTTGTGAGGAATGAAAAG-3′
	NR_036530-R	5′- GAAATTACGGGCACAGGAAGT-3′
	ACTB-F	5′- TGACCCAGATCATGTTTGAGA-3′
	ACTB-R	5′- ATAGCACAGCCTGGATAGCAA-3′
	TBP-F	5′- TCGGAGAGTTCTGGGATTGTA-3′
	TBP-R	5′- CGAAGTGCAATGGTCTTTAGG-3′
5' RACE primers	GSP1	5′-CGGAGCGAGAAGTCACTTAGAA-3′
	GSP2	5′-ACCCCATTTCAAGGTTGGTC-3′.
3' RACE primers	GSP1	5′- AGGAGCTGGCTCGGTTATTTC-3′
	GSP2	5′-CTTTCCGAGGGAGGAATGTG-3′
	GSP3	5′-TGGTGGAGAGAGGGATAGAGAA-3′
	GSP4	5′-AGAAAAGATTGCGTTGGAATCA-3′
	GSP5	5′-CTCAAAGTGCTGGGATTACAGG-3′
	GSP6	5′-CATCACATATTGCTGGAGTGGA-3′
Northern blot probes	NB1F	5′-AGGAGCTGGCTCGGTTATTT-3′
	NB1R	5′-CTATCCCTCTCTCCACCAACC-3′
	NB2F	5′-TGAATTTCTGCTGGCATTTCT-3′
	NB2R	5′-AGGAGATTAGGCAGGACTTGG-3′
RACE sequences	PrimaryCap1	chr7 139877282 139877812
	PrimaryCap2	chr7 139877282 139879440
	PrimaryCap3	chr7 139877282 139878633
	PrimaryCap4	chr7 139877282 139878131
	PrimaryCap5	chr7 139877282 139877872
	SecondaryCap1	chr7 139877527 139877812
	SecondaryCap2	chr7 139877527 139879440
	SecondaryCap3	chr7 139877527 139878624
	SecondaryCap4	chr7 139877527 139878131
	SecondaryCap5	chr7 139877527 139877872
